# Supplementary material for: The microbiome- and metabolome-modulating activity of dietary cholesterol: insights from the small and large intestines
Source: Royal Society of Chemistry journal article supplement (doi:10.1039/d4fo03049d), 2025-01-01
Supplement: d4fo03049d1.pdf [file d4fo03049d1.pdf]

Supplementary Table S1. Ingredients of Control diet.

| Ingredients, g/kg                                | Control diet |
|--------------------------------------------------|--------------|
| Protein (casein and L-cystine)                   | 141          |
| Carbohydrate (dextrin, sucrose, and corn starch) | 722          |
| Fat (soybean oil and lard)                       | 40           |
| Fiber (cellulose)                                | 50           |
| Mineral and vitamin mixture                      | 47           |
| Antioxidant (TBHQ)                               | 0.008        |
| Total, g                                         | 1000         |
| Energy, kcal/g                                   | 3.6          |
| % kcal from fat                                  | 10           |
