# Supplementary material for: The microbiome- and metabolome-modulating activity of dietary cholesterol: insights from the small and large intestines
Source: Royal Society of Chemistry journal article supplement (doi:10.1039/d4fo03049d), 2025-01-01
Supplement: d4fo03049d2.xlsx [file d4fo03049d2.xlsx]

## Sheet: Sheet1
Table S2. Metabolites Significantly Altered in eLI_0 and eLI_05 Groups Based on Metabolomics
ID	Metabolite	Metab ID	Significant	KEGG Compound ID	Mode	CAS ID	M/Z	Retention time	Adducts	Formula	Fragmentation Score	Theoretical Fragmentation Score	Library ID	KEGG Compound First Category	KEGG Compound Second Category	KEGG Pathway ID	KEGG Pathway First Category	KEGG Pathway Second Category	HMDB Superclass	HMDB Class	HMDB Subclass	Fragmentation Score	Theoretical Fragmentation Score	KEGG Pathway Description	KEGG Pathway Description	VIP_pred_OPLS-DA	VIP_PLS-DA	P_value	FDR	eLI_0_1	eLI_0_2	eLI_0_3	eLI_0_4	eLI_0_5	eLI_05_1	eLI_05_2	eLI_05_3	eLI_05_4	eLI_05_5
neg_135	4-Oxododecanedioic acid	metab_8265	yes	-	neg	-	243.124	5.53997	M-H, M+Na-2H, M-H2O-H	C12H20O5	84.6	0	-	-	-	-	-	-	-	-	-	84.6	0	-	-	1.3223	1.3077	3.984e-08	2.479e-06	6.3938	6.3688	6.3363	6.3573	6.3536	5.9632	5.886	5.9513	5.9988	5.944
neg_152	7-DEHYDROXYCHOL-8(14)-ENIC ACID	metab_8454	yes	-	neg	-	389.269	5.7879	M-H, 2M-H, M+FA-H	C24H38O4	59.2	0	-	-	-	-	-	-	-	-	-	59.2	0	-	-	1.0018	0.9784	0.002596	0.009114	6.3933	6.4863	6.3528	6.4006	6.3353	6.8422	6.6596	6.5554	6.7725	6.5379
neg_1955	DL-m-Tyrosine	metab_8907	yes	-	neg	-	180.066	1.6516	M-H	C9H11NO3	59.4	0	-	-	-	-	-	-	-	-	-	59.4	0	-	-	1.3271	1.3012	5.99e-05	0.0005694	4.1141	4.3189	4.2261	4.1941	4.1734	4.5845	4.766	4.6942	4.4995	4.6794
neg_3004	Tyr Thr Ala Glu	metab_10056	yes	-	neg	-	481.194	3.32863	M-H	C21H30N4O9	56.5	0	-	-	-	-	-	-	-	-	-	56.5	0	-	-	1.6961	1.7724	0.02498	0.05204	4.8152	3.2887	5.0249	4.6351	5.0387	3.8056	3.3069	3.7296	3.283	3.8642
neg_3031	Glu Tyr Asp Lys	metab_10086	yes	-	neg	-	552.231	3.36123	M-H	C24H35N5O10	69.8	0	-	-	-	-	-	-	-	-	-	69.8	0	-	-	1.5539	1.5218	0.0009048	0.004108	5.0572	4.6819	5.317	5.1225	5.336	4.594	4.4866	4.3423	4.4793	4.3619
neg_3248	Gln Val Tyr Asp	metab_10321	yes	-	neg	-	522.22	3.61042	M-H	C23H33N5O9	36.5	0	-	-	-	-	-	-	-	-	-	36.5	0	-	-	1.962	1.9057	0.0005899	0.002971	4.8178	4.1694	4.8933	4.8561	4.935	3.838	3.8247	3.6173	4.0031	3.3142
neg_3539	Ser Leu Ser Gly Leu	metab_10640	yes	-	neg	-	474.257	3.99705	M-H	C20H37N5O8	52.1	0	-	-	-	-	-	-	-	-	-	52.1	0	-	-	1.7512	1.708	0.002919	0.009967	4.9865	5.0164	4.9583	4.9266	4.9002	3.3863	3.9402	4.3728	4.5122	4.2924
neg_4003	Phe Lys Thr Glu	metab_11142	yes	-	neg	-	522.257	4.73017	M-H	C24H37N5O8	63.8	0	-	-	-	-	-	-	-	-	-	63.8	0	-	-	2.5591	2.4914	6.783e-08	3.793e-06	5.0954	4.8768	5.2994	5.1271	5.2646	3.5992	3.5137	3.697	3.5005	3.5946
neg_5420	Glycerophospho-N-Oleoyl Ethanolamine	metab_12675	yes	-	neg	-	478.294	7.0783	M-H	C23H46NO7P	64.2	0	-	-	-	-	-	-	-	-	-	64.2	0	-	-	1.4065	1.3738	1.197e-06	3.45e-05	4.9692	4.931	4.8091	4.8982	4.8113	5.3645	5.3798	5.3859	5.383	5.2897
neg_647	Tyr Ser Val Glu	metab_13802	yes	-	neg	-	495.209	3.24013	M-H, M+Na-2H	C22H32N4O9	33.5	0	-	-	-	-	-	-	-	-	-	33.5	0	-	-	2.4312	2.3668	9.771e-05	0.0008105	5.5692	4.8462	5.86	5.5788	5.8636	4.0369	4.2821	4.2478	3.9189	3.7914
neg_6667	Glu Ile Phe Lys	metab_14020	yes	-	neg	-	534.293	4.7522	M-H	C26H41N5O7	41.6	0	-	-	-	-	-	-	-	-	-	41.6	0	-	-	2.4846	2.4148	0.0001345	0.001022	5.0065	4.1322	5.072	5.0807	5.0468	3.5636	2.9438	3.009	3.4023	3.5877
neg_6996	Thr Glu Leu Lys	metab_14375	yes	-	neg	-	488.273	4.28507	M-H	C21H39N5O8	31.1	0	-	-	-	-	-	-	-	-	-	31.1	0	-	-	1.7213	1.6767	2.003e-05	0.0002606	4.4684	4.5332	4.6938	4.5038	4.7542	3.9077	3.9627	3.9931	3.7242	3.7093
neg_7027	Cis-and trans-Ethyl 2,4-dimethyl-1,3-dioxolane-2-acetate	metab_14410	yes	-	neg	-	421.209	4.23705	2M+FA-H	C9H16O4	0	57.6	-	-	-	-	-	-	-	-	-	0	57.6	-	-	1.923	1.9174	0.003695	0.01201	4.9264	3.8334	5.2072	4.6347	5.1732	3.5946	3.6039	3.8609	3.8583	3.5856
neg_7190	Ala Leu Gly Ile Ser	metab_14585	yes	-	neg	-	458.262	4.06903	M-H	C20H37N5O7	32.4	0	-	-	-	-	-	-	-	-	-	32.4	0	-	-	2.0915	2.0267	6.042e-05	0.0005732	5.3346	4.8034	5.3434	5.3204	5.3813	4.2773	3.8385	4.3417	4.2389	4.0501
neg_7191	Glu-val-phe	metab_14586	yes	-	neg	-	392.182	4.06903	M-H	C19H27N3O6	70.1	0	-	-	-	-	-	-	-	-	-	70.1	0	-	-	1.3856	1.3743	0.009157	0.02348	4.8294	4.343	4.8607	4.8309	4.9	4.274	4.0445	4.5412	3.7403	4.2739
neg_7530	Glu Val Ile Glu	metab_14959	yes	-	neg	-	487.241	3.6895	M-H	C21H36N4O9	49.1	0	-	-	-	-	-	-	-	-	-	49.1	0	-	-	2.089	2.1512	0.01553	0.03548	3.8426	2.4455	4.588	4.0083	4.5573	2.0485	2.0577	2.8162	2.3513	3.2363
neg_7778	Ser Asp Arg Asp	metab_15226	yes	-	neg	-	490.195	3.44182	M-H	C17H29N7O10	62.3	0	-	-	-	-	-	-	-	-	-	62.3	0	-	-	1.9605	1.9174	2.889e-07	1.167e-05	5.3596	5.3454	5.3706	5.3665	5.4015	4.2334	4.5354	4.5273	4.5343	4.4412
neg_8509	Ala Val Asp Asp	metab_16028	yes	-	neg	-	417.163	2.68603	M-H	C16H26N4O9	61.9	0	-	-	-	-	-	-	-	-	-	61.9	0	-	-	3.0862	2.9898	0.004886	0.01475	4.9121	3.8347	5.2466	4.8965	5.237	0.4585	3.1164	3.2775	3.1004	0.4526
neg_8633	Acetyl-DL-Valine	metab_16161	yes	-	neg	-	158.081	2.53303	M-H	C7H13NO3	44.4	0	-	-	-	-	-	-	-	-	-	44.4	0	-	-	1.0024	0.9754	7.251e-06	0.0001298	5.2525	5.2737	5.1959	5.275	5.238	5.5557	5.4779	5.4854	5.5003	5.4383
neg_8715	8-hydroxy-2'-deoxy Guanosine	metab_16252	yes	-	neg	-	282.084	2.42802	M-H	C10H13N5O5	30.7	0	-	-	-	-	-	-	-	-	-	30.7	0	-	-	1.8421	1.7912	0.03126	0.06262	5.2506	5.2031	5.2425	5.2282	5.2475	2.7736	4.8784	4.7867	3.2149	4.7023
neg_9300	5,5-Dimethylbarbituric acid	metab_16884	yes	-	neg	-	155.045	1.56413	M-H	C6H8N2O3	47	0	-	-	-	-	-	-	-	-	-	47	0	-	-	1.5189	1.485	2.295e-05	0.0002861	5.4253	5.3907	5.4422	5.4084	5.4599	6.1457	5.8622	5.9225	6.1482	5.8845
neg_9758	Glycylglycine	metab_17342	yes	C02037	neg	556-50-3	131.045	0.640783	M-H	C4H8N2O3	33.3	0	;MJDBOTE0000451	-	-	-	-	-	-	-	-	33.3	0	-	-	1.1114	1.0777	0.0005685	0.002899	4.583	4.6499	4.6	4.5842	4.5983	5.0243	4.8254	4.8462	5.105	4.8357
neg_980	Thr Ile Lys Glu	metab_17387	yes	-	neg	-	488.272	4.8244	M-H, M+Na-2H	C21H39N5O8	31.7	0	-	-	-	-	-	-	-	-	-	31.7	0	-	-	1.3105	1.2841	3.664e-08	2.371e-06	5.7981	5.7754	5.7767	5.7964	5.8161	5.4049	5.3965	5.4306	5.3805	5.3197
pos_1095	Val Arg	metab_104	yes	-	pos	-	274.187	1.12252	M+2H, M+H	C11H23N5O3	35.7	0	-	-	-	-	-	-	-	-	-	35.7	0	-	-	2.3854	2.3589	0.001938	0.01225	4.634	4.4433	4.431	4.6057	4.8518	3.1841	3.9689	4.0267	3.9346	3.9106
pos_1100	Ser Leu Lys	metab_111	yes	-	pos	-	347.228	1.14597	M+2H, M+H	C15H30N4O5	34.4	0	-	-	-	-	-	-	-	-	-	34.4	0	-	-	1.539	1.5258	0.00155	0.01021	4.7086	4.7434	4.6406	4.5861	4.4415	5.0525	4.886	4.9378	5.0437	4.8246
pos_1118	Pro Thr	metab_130	yes	-	pos	-	217.118	1.26308	M+H, M+K	C9H16N2O4	72.1	0	-	-	-	-	-	-	-	-	-	72.1	0	-	-	1.0721	1.0516	0.004299	0.02305	5.3185	5.2837	5.281	5.3837	5.4362	5.2272	5.1133	5.1457	5.2613	5.1396
pos_1818	Lys Ser Leu	metab_883	yes	-	pos	-	347.228	1.8675	M+H	C15H30N4O5	54.3	0	-	-	-	-	-	-	-	-	-	54.3	0	-	-	3.5828	3.5303	2.597e-09	6.209e-07	5.7306	5.7158	5.738	5.7451	5.7549	4.4506	4.1831	4.1873	4.1918	4.1935
pos_1986	Phe Asp	metab_1060	yes	-	pos	-	281.113	2.07717	M+H	C13H16N2O5	57.9	0	-	-	-	-	-	-	-	-	-	57.9	0	-	-	1.4908	1.4792	0.006988	0.03285	5.7214	5.2681	5.6913	5.7192	5.6913	5.2548	5.2372	5.3074	5.3434	5.3262
pos_2071	Asp Leu	metab_1151	yes	-	pos	-	247.129	2.22493	M+H	C10H18N2O5	62.5	0	-	-	-	-	-	-	-	-	-	62.5	0	-	-	1.2566	1.2829	0.02263	0.08083	5.5234	5.4097	5.6251	5.4848	5.6953	5.0605	5.3983	5.4137	5.1228	5.4216
pos_2084	Ser Leu	metab_1165	yes	-	pos	-	219.134	2.24833	M+H	C9H18N2O4	83.7	0	-	-	-	-	-	-	-	-	-	83.7	0	-	-	2.1581	2.1249	1.329e-10	7.333e-08	6.3096	6.3155	6.3332	6.3446	6.3199	5.7994	5.7639	5.801	5.8039	5.7476
pos_2095	Ala Glu Ala Leu Glu	metab_1176	yes	-	pos	-	532.262	2.26397	M+H	C22H37N5O10	57	0	-	-	-	-	-	-	-	-	-	57	0	-	-	2.0447	2.063	0.02633	0.09077	5.2698	4.9067	6.1117	5.2632	6.1204	4.7205	4.7652	4.982	5.0132	4.7315
pos_2104	Gly Gly Ile	metab_1187	yes	-	pos	-	246.145	2.27958	M+H	C10H19N3O4	61.6	0	-	-	-	-	-	-	-	-	-	61.6	0	-	-	1.5701	1.5497	0.001105	0.008025	4.9289	4.6729	4.839	4.9623	4.9015	4.4354	4.5621	4.6804	4.495	4.481
pos_2166	Ser Leu Asp	metab_1254	yes	-	pos	-	334.16	2.38105	M+H	C13H23N3O7	46.7	0	-	-	-	-	-	-	-	-	-	46.7	0	-	-	2.5222	2.5945	0.01977	0.07353	5.2501	3.8328	5.4839	5.2743	5.4773	3.6457	4.1461	4.5262	3.6617	4.1936
pos_2202	Thr Phe	metab_1294	yes	-	pos	-	267.134	2.4358	M+H	C13H18N2O4	78.6	0	-	-	-	-	-	-	-	-	-	78.6	0	-	-	1.4102	1.378	0.0009464	0.007062	4.7329	4.952	4.7806	4.9041	4.7153	5.0214	5.0964	5.1096	5.0392	5.1255
pos_2258	N-Acetyl-DL-methionine	metab_1352	yes	-	pos	-	192.069	2.54465	M+H	C7H13NO3S	90.3	0	-	-	-	-	-	-	-	-	-	90.3	0	-	-	2.4072	2.3805	4.098e-06	0.0001739	5.2093	5.2523	5.1867	5.2487	5.265	4.7223	4.5896	4.4347	4.3722	4.5636
pos_2260	Ile Leu Glu	metab_1355	yes	-	pos	-	374.228	2.54465	M+H	C17H31N3O6	79.9	0	-	-	-	-	-	-	-	-	-	79.9	0	-	-	2.5538	2.534	0.004056	0.02202	4.9073	3.9046	5.1685	4.9665	5.1017	3.8796	3.8868	3.8911	3.8955	3.8972
pos_2311	Gly Pro Ile	metab_1410	yes	-	pos	-	286.176	2.63835	M+H	C13H23N3O4	37.2	0	-	-	-	-	-	-	-	-	-	37.2	0	-	-	1.671	1.6415	2.134e-05	0.0006248	5.8649	5.8146	5.9151	5.8933	5.8852	5.4007	5.5506	5.5923	5.5842	5.5412
pos_2350	N-Benzyloxycarbonylglycine	metab_1453	yes	C03710	pos	1138-80-3	227.102	2.7244	M+NH4	C10H11NO4	59.4	0	-	-	-	-	-	-	-	-	-	59.4	0	-	-	1.2951	1.2765	0.001804	0.01152	4.6427	4.8594	4.9002	4.8219	4.9198	5.0688	5.0664	5.0453	5.0658	5.0396
pos_2418	Ala Asp Phe	metab_1528	yes	-	pos	-	352.149	2.86475	M+H	C16H21N3O6	48.3	0	-	-	-	-	-	-	-	-	-	48.3	0	-	-	2.8125	2.7928	0.004281	0.02304	5.229	3.8394	5.1761	5.1704	5.3999	3.8143	3.8215	3.9092	3.8303	3.832
pos_2436	Val Asp Ile	metab_1548	yes	-	pos	-	346.197	2.9038	M+H	C15H27N3O6	66.1	0	-	-	-	-	-	-	-	-	-	66.1	0	-	-	2.087	2.1069	0.01115	0.04708	5.4632	4.5551	5.5326	5.4521	5.5388	4.53	4.5372	4.8818	4.546	4.7353
pos_2547	Tyr Asp Ile	metab_1665	yes	-	pos	-	410.191	3.12997	M+H	C19H27N3O7	68.8	0	-	-	-	-	-	-	-	-	-	68.8	0	-	-	3.1256	3.0833	0.001731	0.01117	5.5464	4.1495	5.6463	5.5281	5.5855	3.9614	3.9686	3.9729	3.9774	3.9791
pos_257	Val Glu	metab_1689	yes	-	pos	-	247.129	1.11472	M+H, M+Na, M+K	C10H18N2O5	65.6	0	-	-	-	-	-	-	-	-	-	65.6	0	-	-	1.4095	1.3859	0.002497	0.01504	5.7848	5.5887	5.9409	5.8402	5.8736	5.5774	5.5059	5.5633	5.5464	5.476
pos_376	(3R,4R)-3-Amino-4-Hydroxypentanoic Acid	metab_2966	yes	-	pos	-	134.081	0.592	M+H, M+Na	C5H11NO3	57.9	0	-	-	-	-	-	-	-	-	-	57.9	0	-	-	1.3423	1.3132	0.0001433	0.002628	4.9037	4.9509	4.7661	4.9037	4.8579	5.122	5.0967	5.1037	5.061	5.1233
pos_4952	Ser Phe Leu	metab_4271	yes	-	pos	-	366.202	5.12578	M+H	C18H27N3O5	83.3	0	-	-	-	-	-	-	-	-	-	83.3	0	-	-	1.7541	1.7259	3.576e-07	2.881e-05	5.2722	5.308	5.2422	5.198	5.2716	5.624	5.5703	5.6671	5.63	5.6183
pos_5018	Phe Ile	metab_4343	yes	-	pos	-	279.17	4.97617	M+H	C15H22N2O3	72.7	0	-	-	-	-	-	-	-	-	-	72.7	0	-	-	1.4997	1.4682	4.648e-05	0.001175	5.065	5.2582	5.1342	5.1553	5.1248	5.4021	5.4096	5.4794	5.4	5.4244
pos_524	Ser Gly Ile	metab_4580	yes	-	pos	-	276.155	2.34205	M+H, M+ACN+Na	C11H21N3O5	40.5	0	-	-	-	-	-	-	-	-	-	40.5	0	-	-	1.3297	1.3245	0.006825	0.03231	5.5235	5.3644	5.4315	5.4517	5.4858	5.0483	5.299	5.3343	4.9994	5.2521
pos_530	Gly Pro Leu	metab_4645	yes	-	pos	-	286.176	2.38105	M+H, M+CH3OH+H	C13H23N3O4	57.3	0	-	-	-	-	-	-	-	-	-	57.3	0	-	-	1.1723	1.1531	1.852e-06	9.916e-05	6.0078	6.0212	6.0455	6.0435	6.0081	5.8257	5.8717	5.8903	5.8618	5.8564
pos_5637	Ile Thr Ile	metab_4986	yes	-	pos	-	346.233	3.58887	M+H	C16H31N3O5	85.8	0	-	-	-	-	-	-	-	-	-	85.8	0	-	-	2.3572	2.3418	0.02082	0.07631	5.1887	5.3745	3.9931	5.3691	4.1043	5.656	5.7306	5.7613	5.6737	5.6865
pos_5642	Flindersine	metab_4992	yes	C10679	pos	523-64-8	245.128	3.57328	M+NH4	C14H13NO2	56.2	0	-	-	-	-	-	-	-	-	-	56.2	0	-	-	1.1934	1.1915	0.008866	0.03926	5.1728	5.0219	5.1131	4.8303	5.0483	5.2088	5.2854	5.2832	5.3077	5.1825
pos_5697	Ile Asp Ile	metab_5042	yes	-	pos	-	360.212	3.39462	M+H	C16H29N3O6	77.4	0	-	-	-	-	-	-	-	-	-	77.4	0	-	-	1.6776	1.6852	0.008073	0.03656	5.0334	4.5965	5.191	5.1032	5.2351	4.5715	4.5787	4.7483	4.5874	4.5891
pos_5731	Ile Glu Val	metab_5076	yes	-	pos	-	360.212	3.27033	M+H	C16H29N3O6	64	0	-	-	-	-	-	-	-	-	-	64	0	-	-	1.2896	1.2591	0.03408	0.1101	4.71	4.3741	4.8425	4.8967	4.3886	4.349	4.3562	4.3605	4.365	4.3666
pos_5740	N-Acetyl-DL-Leucine	metab_5085	yes	-	pos	-	174.112	3.2625	M+H	C8H15NO3	49	0	;MJDBOTE0001584	-	-	-	-	-	-	-	-	49	0	-	-	1.2336	1.2299	0.003571	0.01993	4.6579	4.7062	4.7813	4.6363	4.6987	4.8749	4.8663	4.972	4.7851	5.0525
pos_5759	Val Asp Leu	metab_5105	yes	-	pos	-	346.197	3.19252	M+H	C15H27N3O6	79.5	0	-	-	-	-	-	-	-	-	-	79.5	0	-	-	1.6174	1.6135	0.01692	0.06524	4.7603	4.1994	4.661	4.9143	4.8684	4.3323	4.1816	4.4361	4.1903	4.192
pos_5806	1-Acetamidocyclopentanecarboxylic acid	metab_5153	yes	-	pos	-	172.097	3.10652	M+H	C8H13NO3	58.8	0	-	-	-	-	-	-	-	-	-	58.8	0	-	-	2.3994	2.3563	6.024e-05	0.001403	3.7095	4.0017	3.6886	3.4457	3.6715	4.5087	4.3249	4.4244	4.4174	4.4058
pos_5872	Pro Trp	metab_5222	yes	-	pos	-	302.149	2.96622	M+H	C16H19N3O3	50.2	0	-	-	-	-	-	-	-	-	-	50.2	0	-	-	2.1774	2.182	0.03675	0.1164	3.8048	2.4634	3.8746	2.4749	3.7065	2.4384	2.4456	2.4499	2.4544	2.456
pos_5970	N-(1-benzylpiperidin-4-yl)-1-(5-phenylpyrimidin-2-yl)piperidine-3-carboxamide	metab_5327	yes	-	pos	-	456.279	2.81802	M+H	C28H33N5O	62.3	0	-	-	-	-	-	-	-	-	-	62.3	0	-	-	1.0615	1.0587	0.01075	0.04577	5.077	5.1095	4.9362	5.0878	4.9202	5.3081	5.1821	5.2216	5.1749	5.1067
pos_6005	Gln Leu Thr Asp	metab_5365	yes	-	pos	-	476.234	2.76338	M+H	C19H33N5O9	44.2	0	-	-	-	-	-	-	-	-	-	44.2	0	-	-	2.7728	2.7724	0.01043	0.04471	5.299	3.9488	5.4802	5.3118	5.4896	4.1101	4.3384	3.9957	3.1874	4.0466
pos_6009	Gly Asp Phe	metab_5369	yes	-	pos	-	338.134	2.76338	M+H	C15H19N3O6	71.6	0	-	-	-	-	-	-	-	-	-	71.6	0	-	-	3.5565	3.5127	0.001233	0.00869	5.9707	4.3477	6.0582	5.93	6.0415	3.8732	3.8804	4.3821	3.8892	3.8909
pos_6079	Ile Thr Tyr	metab_5446	yes	-	pos	-	396.212	2.65402	M+H	C19H29N3O6	87	0	-	-	-	-	-	-	-	-	-	87	0	-	-	2.4951	2.4461	8.715e-06	0.0003157	4.9202	5.3425	5.0196	5.024	4.9611	5.7907	5.7909	5.8201	5.8224	5.7889
pos_6145	Asp Ser Leu	metab_5519	yes	-	pos	-	334.16	2.5603	M+H	C13H23N3O7	50.4	0	-	-	-	-	-	-	-	-	-	50.4	0	-	-	3.1539	3.1259	0.003811	0.02103	5.5209	3.8526	5.614	5.5133	5.6827	3.8275	3.8347	3.839	3.8435	3.8451
pos_6167	Val Glu Val	metab_5543	yes	-	pos	-	346.197	2.53683	M+H	C15H27N3O6	47.4	0	-	-	-	-	-	-	-	-	-	47.4	0	-	-	2.1927	2.1755	0.007382	0.03421	4.83	4.0904	4.9983	4.9629	5.0971	4.1691	3.854	4.3142	4.1275	3.9938
pos_6230	Ala Gly Ile	metab_5612	yes	-	pos	-	260.16	2.44362	M+H	C11H21N3O4	42	0	-	-	-	-	-	-	-	-	-	42	0	-	-	1.219	1.2083	0.01411	0.05697	4.4676	4.3389	4.3435	4.3089	4.3375	4.6214	4.5495	4.7291	4.7277	4.3492
pos_6257	Glu Thr Lys	metab_5640	yes	-	pos	-	377.203	2.41235	M+H	C15H28N4O7	51.9	0	-	-	-	-	-	-	-	-	-	51.9	0	-	-	1.2612	1.246	0.0007822	0.006039	5.4521	5.3401	5.4617	5.4877	5.4179	5.1289	5.2594	5.2951	5.1681	5.2538
pos_6270	Ser Val Tyr	metab_5655	yes	-	pos	-	368.181	2.39672	M+H	C17H25N3O6	52.5	0	-	-	-	-	-	-	-	-	-	52.5	0	-	-	3.3128	3.247	5.231e-06	0.0002108	5.3838	4.9507	5.4572	5.4807	5.4688	4.1888	4.0386	3.7741	4.1193	4.0588
pos_6331	Asn Glu Leu	metab_5723	yes	-	pos	-	375.187	2.31858	M+H	C15H26N4O7	44.9	0	-	-	-	-	-	-	-	-	-	44.9	0	-	-	2.6659	2.6293	0.0005111	0.004298	5.6768	5.1184	5.9617	5.7231	5.9534	4.6705	4.6337	4.9409	4.7255	4.8643
pos_6390	Gly Val Val	metab_5786	yes	-	pos	-	274.176	2.24833	M+H	C12H23N3O4	84.7	0	-	-	-	-	-	-	-	-	-	84.7	0	-	-	1.4985	1.5058	0.00842	0.03768	4.342	4.2274	4.4419	4.4958	4.6104	3.8899	4.236	4.2618	3.9647	4.0613
pos_6396	Ser Asp Ile	metab_5792	yes	-	pos	-	334.16	2.24058	M+H	C13H23N3O7	73.7	0	-	-	-	-	-	-	-	-	-	73.7	0	-	-	2.7951	2.7894	0.004612	0.02423	4.8416	3.929	5.407	5.0317	5.3854	3.6399	4.142	3.9121	3.6559	3.6576
pos_6520	Pro Glu Val	metab_5925	yes	-	pos	-	344.181	2.07717	M+H	C15H25N3O6	59.2	0	-	-	-	-	-	-	-	-	-	59.2	0	-	-	2.0631	2.0323	0.0007148	0.00561	4.8437	4.7943	5.193	4.9524	4.9871	4.3322	4.6382	4.4251	4.144	4.4211
pos_6572	Phe Gly	metab_5977	yes	-	pos	-	223.107	2.03025	M+H	C11H14N2O3	79.2	0	-	-	-	-	-	-	-	-	-	79.2	0	-	-	1.567	1.5399	1.17e-06	6.559e-05	5.3484	5.3274	5.3922	5.3964	5.3235	5.0837	5.0569	5.0417	5.1214	5.0333
pos_6585	Asp Ile Ser	metab_5990	yes	-	pos	-	334.16	2.01488	M+H	C13H23N3O7	71.9	0	-	-	-	-	-	-	-	-	-	71.9	0	-	-	1.8076	1.875	0.03105	0.103	5.5821	4.9118	6.0274	5.6773	6.0357	5.0105	5.1174	5.216	4.9194	5.1943
pos_6696	Leu Asp Thr	metab_6101	yes	-	pos	-	348.176	1.91418	M+H	C14H25N3O7	63.3	0	-	-	-	-	-	-	-	-	-	63.3	0	-	-	1.1266	1.1245	0.01663	0.06437	5.821	5.5482	5.904	5.8305	5.8671	5.6363	5.5308	5.6143	5.6085	5.5899
pos_6732	Leu Asp Glu	metab_6140	yes	-	pos	-	376.171	1.90642	M+H	C15H25N3O8	58.5	0	-	-	-	-	-	-	-	-	-	58.5	0	-	-	2.2733	2.2263	0.004488	0.02385	5.6152	5.0215	5.8674	5.6757	5.7798	5.1112	4.4465	4.8985	4.8752	4.9842
pos_6824	N-[1-(1-methyl-6-oxopyridazin-3-yl)piperidin-4-yl]-3-(tetrazol-1-yl)propanamide	metab_6239	yes	-	pos	-	333.176	1.82057	M+H	C14H20N8O2	50.1	0	-	-	-	-	-	-	-	-	-	50.1	0	-	-	1.3068	1.2787	0.002621	0.01556	5.6571	5.4069	5.6095	5.5559	5.6747	5.4012	5.2742	5.2956	5.3829	5.3782
pos_6912	Ile Asp Asp	metab_6337	yes	-	pos	-	362.155	1.75842	M+H	C14H23N3O8	57.9	0	-	-	-	-	-	-	-	-	-	57.9	0	-	-	2.1028	2.0765	0.008175	0.03693	5.7703	5.2893	6.0045	5.9459	6.0042	5.377	4.7919	5.3821	4.8748	5.315
pos_6941	Ile Glu	metab_6369	yes	-	pos	-	261.144	1.75058	M+H	C11H20N2O5	53.2	0	-	-	-	-	-	-	-	-	-	53.2	0	-	-	1.7355	1.7138	0.002321	0.01411	6.5842	6.1909	6.7309	6.5924	6.6435	6.127	6.103	6.1483	6.1669	6.14
pos_7022	His Leu Glu	metab_6457	yes	-	pos	-	398.203	1.70383	M+H	C17H27N5O6	68.1	0	-	-	-	-	-	-	-	-	-	68.1	0	-	-	1.366	1.3409	0.0002369	0.003997	5.4648	5.2939	5.3336	5.4149	5.3849	5.0898	5.0867	5.1975	5.1479	5.183
pos_7036	Lys Ile	metab_6472	yes	-	pos	-	260.197	1.69602	M+H	C12H25N3O3	48.1	0	-	-	-	-	-	-	-	-	-	48.1	0	-	-	1.4393	1.4053	0.000449	0.004298	5.7028	5.609	5.7203	5.6685	5.7449	5.5321	5.3161	5.3955	5.4994	5.3787
pos_7101	Lys Leu	metab_6538	yes	-	pos	-	260.196	1.43402	M+H	C12H25N3O3	83.2	0	-	-	-	-	-	-	-	-	-	83.2	0	-	-	1.7949	1.7578	1.876e-05	0.0005725	5.7975	5.6428	5.8974	5.7894	5.8241	5.4093	5.3872	5.4435	5.3942	5.3678
pos_7137	Tyr Lys	metab_6575	yes	-	pos	-	310.176	1.2709	M+H	C15H23N3O4	69.9	0	-	-	-	-	-	-	-	-	-	69.9	0	-	-	1.6034	1.5636	0.0006236	0.005043	4.9675	4.8674	5.0921	5.0204	5.0895	4.8002	4.578	4.6289	4.7628	4.6074
pos_7269	Leu Thr	metab_6713	yes	-	pos	-	233.149	0.9427	M+H	C10H20N2O4	32.3	0	-	-	-	-	-	-	-	-	-	32.3	0	-	-	1.9752	1.9442	0.0001484	0.002716	5.5499	5.4574	5.4968	5.5869	5.6496	5.1003	5.1289	5.2305	4.8718	4.9401
pos_7305	4-Methylpyrimidine	metab_6751	yes	-	pos	-	95.0607	0.903783	M+H	C5H6N2	74.3	0	-	-	-	-	-	-	-	-	-	74.3	0	-	-	1.2831	1.2634	8.516e-05	0.001839	5.6891	5.6812	5.6968	5.6627	5.679	5.5363	5.4267	5.4672	5.5481	5.4163
pos_7389	(R)-(+)-2-Pyrrolidone-5-carboxylic acid	metab_6838	yes	-	pos	-	130.05	0.68525	M+H	C5H7NO3	59.7	0	-	-	-	-	-	-	-	-	-	59.7	0	-	-	3.7115	3.6582	0.0006362	0.005097	6.0534	5.9166	6.0542	6.0032	6.0434	3.7182	4.8174	5.1873	3.6236	3.6307
pos_7437	Gly Pro Lys	metab_6884	yes	-	pos	-	301.187	0.623083	M+H	C13H24N4O4	71.9	0	-	-	-	-	-	-	-	-	-	71.9	0	-	-	1.4603	1.4484	0.03858	0.1205	3.9638	3.963	4.3223	4.0861	4.3281	3.7557	3.4733	3.7467	3.5848	4.2241
pos_7588	Laminine	metab_7044	yes	-	pos	-	189.16	0.53765	M+H	C9H20N2O2	69.9	0	-	-	-	-	-	-	-	-	-	69.9	0	-	-	1.6758	1.6432	0.001489	0.009938	4.6415	4.3426	4.4294	4.2926	4.6169	4.0021	4.1305	4.0178	4.2064	4.0713
neg_2408	Rhodamine B	metab_9401	yes	C19517	neg	81-88-9;64381-98-2	488.236	2.57288	M+FA-H	C28H31N2O3+	0	66.2	HMDB0031786	-	-	-	-	-	Organoheterocyclic compounds	Benzopyrans	1-benzopyrans	0	66.2	-	-	1.7178	1.6828	0.0006757	0.003295	5.7193	5.0422	5.7738	5.6926	5.7903	4.7222	4.8147	4.9216	4.8227	4.8476
neg_8534	Chromafenozide	metab_16055	yes	C18515	neg	143807-66-3	429.199	2.65342	M+Cl	C24H30N2O3	0	41.6	HMDB0250201	-	-	-	-	-	Organoheterocyclic compounds	Benzopyrans	1-benzopyrans	0	41.6	-	-	1.31	1.2742	2.83e-07	1.152e-05	6.2247	6.2021	6.3037	6.2592	6.3065	5.8192	5.8523	5.9106	5.8386	5.8332
neg_2154	4-Hydroxyphenylacetic acid sulfate	metab_9122	yes	-	neg	-	266.975	2.16367	M+Cl	C8H8O6S	0	32.3	HMDB0304906	-	-	-	-	-	Benzenoids	Phenols	1-hydroxy-2-unsubstituted benzenoids	0	32.3	-	-	1.1342	1.1239	0.003748	0.01213	5.8038	5.7849	5.7255	5.9509	5.9829	5.7412	5.5148	5.3328	5.3066	5.4865
neg_3215	4-Hydroxyphenylacetic Acid	metab_17597	yes	C00642	neg	156-38-7	151.039	3.58582	M-H	C8H8O3	44.5	0	HMDB0000020;HMDB0060390;MJDBOTE0000455	-	-	map01100;map01220;map00360;map01120;map00350	Metabolism;Metabolism;Metabolism;Metabolism;Metabolism	Global and overview maps;Global and overview maps;Amino acid metabolism;Global and overview maps;Amino acid metabolism	Benzenoids	Phenols	1-hydroxy-2-unsubstituted benzenoids	44.5	0	Metabolic pathways;Degradation of aromatic compounds;Phenylalanine metabolism;Microbial metabolism in diverse environments;Tyrosine metabolism	Metabolic pathways;Degradation of aromatic compounds;Phenylalanine metabolism;Microbial metabolism in diverse environments;Tyrosine metabolism	1.3383	1.302	7.15e-07	2.291e-05	4.7074	4.7806	4.6104	4.7313	4.6519	5.1383	5.1163	5.1157	5.151	5.1054
pos_812	(1R,9R,13R)-1,13-Dimethyl-10-[[(2R)-oxolan-2-yl]methyl]-10-azatricyclo[7.3.1.02,7]trideca-2(7),3,5-trien-4-ol	metab_7280	yes	-	pos	-	284.2	5.60573	M+H-H2O, M+CH3OH+H	C19H27NO2	0	39.1	HMDB0242342	-	-	-	-	-	Alkaloids and derivatives	6,7-benzomorphans	2,6-dimethyl-3-benzazocines	0	39.1	-	-	1.168	1.1546	0.02032	0.07504	5.4667	5.5327	5.5786	5.4944	5.5156	5.4018	5.1151	5.2063	5.5241	5.2596
neg_401	N-(Hydroxymethyl)acrylamide	metab_11149	yes	C19456	neg	924-42-5	247.093	0.62485	M-H2O-H, 2M+FA-H	C4H7NO2	0	34.2	HMDB0255023	-	-	-	-	-	Organic acids and derivatives	Carboxylic acids and derivatives	Acrylic acids and derivatives	0	34.2	-	-	1.351	1.3701	0.006872	0.01891	4.5301	4.09	4.8147	4.5072	4.7296	3.7264	4.2345	4.0583	3.932	4.0048
pos_3955	3H-Dopamine	metab_3181	yes	-	pos	-	156.102	7.4848	M+H	C8H13NO2	0	32.7	HMDB0246265	-	-	-	-	-	Organic oxygen compounds	Organooxygen compounds	Alcohols and polyols	0	32.7	-	-	1.1923	1.1744	0.002385	0.01446	4.9401	4.9646	4.976	4.9903	5.0254	4.6335	4.8026	4.7474	4.8796	4.8438
pos_5914	[3-(2-Aminopropyl)-6-methylidenecyclohexa-1,3-dien-1-yl]methanediol	metab_5268	yes	-	pos	-	454.265	2.91938	2M+ACN+Na	C11H17NO2	0	41.1	HMDB0257571	-	-	-	-	-	Organic oxygen compounds	Organooxygen compounds	Alcohols and polyols	0	41.1	-	-	1.0511	1.0534	0.0133	0.05441	5.2504	5.2997	5.2476	5.1636	5.3383	5.1569	5.1721	4.9372	5.1468	5.0279
neg_9132	2-Hydroxybutyric Acid	metab_16705	yes	C05984	neg	3347-90-8;600-15-7	103.039	1.88347	M-H	C4H8O3	61.4	0	HMDB0000008;PW_C000004	-	-	map00640	Metabolism	Carbohydrate metabolism	Organic acids and derivatives	Hydroxy acids and derivatives	Alpha hydroxy acids and derivatives	61.4	0	Propanoate metabolism	Propanoate metabolism	1.5944	1.581	8.215e-06	0.0001398	5.8225	6.0043	5.9539	6.061	6.0562	5.5175	5.3229	5.3143	5.3725	5.2606
pos_2211	Fluoroacetic acid	metab_1304	yes	C06108	pos	144-49-0	174.058	2.45145	2M+NH4	C2H3FO2	0	30.5	HMDB0252369	-	-	map00983	Metabolism	Xenobiotics biodegradation and metabolism	Organic acids and derivatives	Carboxylic acids and derivatives	Alpha-halocarboxylic acids and derivatives	0	30.5	Drug metabolism - other enzymes	Drug metabolism - other enzymes	2.0975	2.0384	0.02847	0.09624	3.6414	4.1027	5.1003	4.2798	4.2945	3.8435	3.2165	3.2208	3.76	3.7316
pos_231	Sphinganine	metab_1408	yes	C00836	pos	764-22-7	302.305	5.78572	M+H-H2O, M+H, M+H-2H2O	C18H39NO2	61.4	0	PW_C000184;HMDB0242634;LMSP01020001;HMDB0000269	-	-	map00600;map01100;map04071	Metabolism;Metabolism;Environmental Information Processing	Lipid metabolism;Global and overview maps;Signal transduction	Organic nitrogen compounds	Organonitrogen compounds	Amines	61.4	0	Sphingolipid metabolism;Metabolic pathways;Sphingolipid signaling pathway	Sphingolipid metabolism;Metabolic pathways;Sphingolipid signaling pathway	1.0641	1.049	1.852e-05	0.0005678	7.0576	7.0339	7.0317	6.9885	7.0209	7.1753	7.1462	7.1348	7.1904	7.179
pos_7106	Daunosamine	metab_6542	yes	-	pos	110344-61-1	189.123	1.39532	M+ACN+H	C6H13NO3	0	40.7	HMDB0250880;HMDB0039014	-	-	-	-	-	Organic nitrogen compounds	Organonitrogen compounds	Amines	0	40.7	-	-	1.3434	1.3351	0.005681	0.02832	4.9828	4.9426	5.0001	4.9454	4.9053	4.8354	4.6849	4.445	4.7691	4.7458
pos_7349	Spermine	metab_6796	yes	C00750	pos	71-44-3	203.223	0.73985	M+H	C10H26N4	62.9	0	HMDB0001256;PW_C000970	-	-	map01100;map00480;map00770;map01240;map04976;map00330;map00410	Metabolism;Metabolism;Metabolism;Metabolism;Organismal Systems;Metabolism;Metabolism	Global and overview maps;Metabolism of other amino acids;Metabolism of cofactors and vitamins;Global and overview maps;Digestive system;Amino acid metabolism;Metabolism of other amino acids	Organic nitrogen compounds	Organonitrogen compounds	Amines	62.9	0	Metabolic pathways;Glutathione metabolism;Pantothenate and CoA biosynthesis;Biosynthesis of cofactors;Bile secretion;Arginine and proline metabolism;beta-Alanine metabolism	Metabolic pathways;Glutathione metabolism;Pantothenate and CoA biosynthesis;Biosynthesis of cofactors;Bile secretion;Arginine and proline metabolism;beta-Alanine metabolism	1.3333	1.3088	0.00101	0.00742	6.6044	6.5106	6.5475	6.4825	6.6393	6.3619	6.2586	6.4434	6.2425	6.295
pos_7621	4,4'-Diaminodibutylamine	metab_7082	yes	C06366	pos	4427-76-3	160.181	0.522167	M+H	C8H21N3	0	47.9	HMDB0031506	-	-	map01110;map00960;map01064;map01060	Metabolism;Metabolism;Metabolism;Metabolism	Global and overview maps;Biosynthesis of other secondary metabolites;Chemical structure transformation maps;Chemical structure transformation maps	Organic nitrogen compounds	Organonitrogen compounds	Amines	0	47.9	Biosynthesis of secondary metabolites;Tropane, piperidine and pyridine alkaloid biosynthesis;Biosynthesis of alkaloids derived from ornithine, lysine and nicotinic acid;Biosynthesis of plant secondary metabolites	Biosynthesis of secondary metabolites;Tropane, piperidine and pyridine alkaloid biosynthesis;Biosynthesis of alkaloids derived from ornithine, lysine and nicotinic acid;Biosynthesis of plant secondary metabolites	2.4039	2.381	0.001323	0.009135	4.6948	4.9215	4.1698	4.4963	4.1085	5.3933	5.135	5.1879	5.3353	5.2276
pos_7622	Spermidine	metab_7083	yes	C00315	pos	124-20-9	146.165	0.522167	M+H	C7H19N3	48.5	0	PW_C000971;HMDB0001257	-	-	map01100;map00480;map04976;map02010;map00330;map01053;map00940;map00410	Metabolism;Metabolism;Organismal Systems;Environmental Information Processing;Metabolism;Metabolism;Metabolism;Metabolism	Global and overview maps;Metabolism of other amino acids;Digestive system;Membrane transport;Amino acid metabolism;Metabolism of terpenoids and polyketides;Biosynthesis of other secondary metabolites;Metabolism of other amino acids	Organic nitrogen compounds	Organonitrogen compounds	Amines	48.5	0	Metabolic pathways;Glutathione metabolism;Bile secretion;ABC transporters;Arginine and proline metabolism;Biosynthesis of siderophore group nonribosomal peptides;Phenylpropanoid biosynthesis;beta-Alanine metabolism	Metabolic pathways;Glutathione metabolism;Bile secretion;ABC transporters;Arginine and proline metabolism;Biosynthesis of siderophore group nonribosomal peptides;Phenylpropanoid biosynthesis;beta-Alanine metabolism	1.1777	1.1714	0.005206	0.02653	6.1623	6.0014	6.1572	6.0316	6.1782	5.8177	5.9311	6.0356	5.888	5.8554
pos_7688	Cadaverine	metab_7155	yes	C01672	pos	462-94-2	103.123	0.459617	M+H	C5H14N2	97.6	0	HMDB0002322;MJDBOTE0000688	-	-	map01100;map00310;map01110;map01120;map00960;map00470;map00480;map04974;map01064;map01060	Metabolism;Metabolism;Metabolism;Metabolism;Metabolism;Metabolism;Metabolism;Organismal Systems;Metabolism;Metabolism	Global and overview maps;Amino acid metabolism;Global and overview maps;Global and overview maps;Biosynthesis of other secondary metabolites;Metabolism of other amino acids;Metabolism of other amino acids;Digestive system;Chemical structure transformation maps;Chemical structure transformation maps	Organic nitrogen compounds	Organonitrogen compounds	Amines	97.6	0	Metabolic pathways;Lysine degradation;Biosynthesis of secondary metabolites;Microbial metabolism in diverse environments;Tropane, piperidine and pyridine alkaloid biosynthesis;D-Amino acid metabolism;Glutathione metabolism;Protein digestion and absorption;Biosynthesis of alkaloids derived from ornithine, lysine and nicotinic acid;Biosynthesis of plant secondary metabolites	Metabolic pathways;Lysine degradation;Biosynthesis of secondary metabolites;Microbial metabolism in diverse environments;Tropane, piperidine and pyridine alkaloid biosynthesis;D-Amino acid metabolism;Glutathione metabolism;Protein digestion and absorption;Biosynthesis of alkaloids derived from ornithine, lysine and nicotinic acid;Biosynthesis of plant secondary metabolites	1.119	1.0997	5.102e-05	0.001258	5.9387	5.8655	5.8976	5.8634	5.8811	5.7191	5.7801	5.7543	5.7055	5.7132
neg_1007	Cysteinyl-Threonine	metab_7597	yes	-	neg	-	203.049	1.69913	M-H2O-H, 2M-H	C7H14N2O4S	0	50.2	HMDB0028785	-	-	-	-	-	Organic acids and derivatives	Carboxylic acids and derivatives	Amino acids, peptides, and analogues	0	50.2	-	-	1.7032	1.6566	4.895e-06	9.623e-05	5.2118	5.2085	5.3075	5.2422	5.2435	4.5717	4.4597	4.7726	4.4203	4.4916
neg_1009	Aceglutamide	metab_7619	yes	-	neg	2490-97-3	169.061	1.70713	M-H2O-H, M-H	C7H12N2O4	41.4	0	HMDB0006029;MJDBOTE0000339	-	-	-	-	-	Organic acids and derivatives	Carboxylic acids and derivatives	Amino acids, peptides, and analogues	41.4	0	-	-	1.1519	1.1431	0.001423	0.005739	4.5269	4.3614	4.7175	4.542	4.7705	4.2251	4.254	4.2259	4.134	4.257
neg_10269	Glycyl-Lysine	metab_7816	yes	-	neg	-	202.119	0.464017	M-H	C8H17N3O3	0	35.6	HMDB0028846	-	-	-	-	-	Organic acids and derivatives	Carboxylic acids and derivatives	Amino acids, peptides, and analogues	0	35.6	-	-	1.5761	1.5711	0.0006797	0.003311	3.5409	3.4906	3.6141	3.5482	3.5946	3.1609	2.5829	2.6182	3.0375	3.0736
neg_1064	Leucyl-Threonine	metab_7951	yes	-	neg	-	213.124	1.85948	M-H2O-H, M-H	C10H20N2O4	0	30.7	HMDB0028939	-	-	-	-	-	Organic acids and derivatives	Carboxylic acids and derivatives	Amino acids, peptides, and analogues	0	30.7	-	-	1.2509	1.2142	0.0001455	0.001074	3.6443	3.8971	3.7472	3.5673	3.7264	4.096	4.1463	4.1599	4.1063	4.0506
neg_121	Glutamylalanine	metab_8111	yes	-	neg	21064-18-6	217.083	0.912367	M-H, M+Na-2H, M+K-2H	C8H14N2O5	0	52.8	HMDB0003764	-	-	-	-	-	Organic acids and derivatives	Carboxylic acids and derivatives	Amino acids, peptides, and analogues	0	52.8	-	-	1.2621	1.2396	0.00232	0.008327	4.8695	4.8796	5.0694	4.9141	5.1712	4.3063	4.6637	4.7125	4.3715	4.6227
neg_1390	Serylvaline	metab_8310	yes	-	neg	51782-06-0	203.103	1.87547	M-H, 2M+FA-H	C8H16N2O4	0	48.9	HMDB0029052	-	-	-	-	-	Organic acids and derivatives	Carboxylic acids and derivatives	Amino acids, peptides, and analogues	0	48.9	-	-	1.123	1.1227	3.15e-05	0.0003579	4.8727	4.9905	4.9447	5.0007	4.9526	4.6099	4.6439	4.6004	4.753	4.5904
neg_1616	Serylhydroxyproline	metab_8559	yes	-	neg	90965-81-4	217.083	0.62485	M-H	C8H14N2O5	0	69.6	HMDB0029040	-	-	-	-	-	Organic acids and derivatives	Carboxylic acids and derivatives	Amino acids, peptides, and analogues	0	69.6	-	-	1.0282	1.0328	0.006126	0.01741	4.8811	4.8073	5.1458	4.8884	5.2018	4.6619	4.7549	4.619	4.5697	4.731
neg_1744	Gamma-Glutamylglutamic acid	metab_8693	yes	C05282	neg	1116-22-9	275.088	0.888367	M-H	C10H16N2O7	0	37.4	HMDB0011737	-	-	-	-	-	Organic acids and derivatives	Carboxylic acids and derivatives	Amino acids, peptides, and analogues	0	37.4	-	-	1.5102	1.5415	0.008548	0.02232	4.5464	3.7587	4.8118	4.3159	4.8566	3.7676	3.7768	3.7686	3.753	3.7586
neg_1828	Gamma-Glutamylarginine	metab_8780	yes	-	neg	31106-03-3	284.136	1.11225	M-H2O-H	C11H21N5O5	0	53.9	HMDB0029143	-	-	-	-	-	Organic acids and derivatives	Carboxylic acids and derivatives	Amino acids, peptides, and analogues	0	53.9	-	-	2.2541	2.3983	0.04805	0.08893	0.0191	0.0185	0.0188	0.4381	0.0197	0.0189	3.3528	3.2217	0.0183	3.3647
neg_1943	Isoleucyl-Threonine	metab_8895	yes	-	neg	-	231.135	1.6038	M-H	C10H20N2O4	0	32.4	HMDB0028917	-	-	-	-	-	Organic acids and derivatives	Carboxylic acids and derivatives	Amino acids, peptides, and analogues	0	32.4	-	-	1.7074	1.6754	4.938e-05	0.0004964	3.4316	3.5588	3.3711	3.1221	3.575	3.9996	4.1869	4.1945	4.0735	4.2106
neg_2096	(2S,3'S)-alpha-Amino-2-carboxy-5-oxo-1-pyrrolidinebutanoic acid	metab_9060	yes	-	neg	96562-85-5	211.072	1.97147	M-H2O-H	C9H14N2O5	0	42.7	HMDB0033436;HMDB0039110	-	-	-	-	-	Organic acids and derivatives	Carboxylic acids and derivatives	Amino acids, peptides, and analogues	0	42.7	-	-	1.4594	1.4347	4.825e-09	4.533e-07	6.2075	6.1924	6.1967	6.2353	6.2095	5.7179	5.6789	5.7314	5.7518	5.6552
neg_2195	Leucylhydroxyproline	metab_9166	yes	-	neg	63912-01-6	243.135	2.26002	M-H	C11H20N2O4	0	59.1	HMDB0028930	-	-	-	-	-	Organic acids and derivatives	Carboxylic acids and derivatives	Amino acids, peptides, and analogues	0	59.1	-	-	1.3549	1.3213	0.0002485	0.001557	6.4196	6.1917	6.6344	6.4786	6.5486	5.9943	5.9824	5.9764	6.0135	5.9444
neg_2267	Tyrosyl-Asparagine	metab_9246	yes	-	neg	-	276.099	2.34802	M-H2O-H	C13H17N3O5	0	47.8	HMDB0029100	-	-	-	-	-	Organic acids and derivatives	Carboxylic acids and derivatives	Amino acids, peptides, and analogues	0	47.8	-	-	2.1386	2.0968	1.032e-05	0.0001616	4.8382	4.8431	4.7875	4.852	4.7739	3.8765	3.645	3.8462	3.2842	3.8688
neg_2270	N-[3,3-Dimethyl-1-(methylamino)-1-oxobutan-2-yl]-N'-hydroxy-3-(hydroxymethyl)-2-(4-methoxyphenyl)butanediamide	metab_9250	yes	-	neg	-	416.179	2.34802	M+Na-2H	C19H29N3O6	0	38.7	HMDB0260415	-	-	-	-	-	Organic acids and derivatives	Carboxylic acids and derivatives	Amino acids, peptides, and analogues	0	38.7	-	-	2.1178	2.0665	0.0001341	0.001022	4.906	4.3229	5.1645	4.9405	5.1792	3.8076	3.837	3.823	3.5222	3.8305
neg_2288	Neurotensin 11-13	metab_9268	yes	-	neg	-	428.215	2.38802	M+Na-2H	C21H33N3O5	0	51.1	HMDB0013024	-	-	-	-	-	Organic acids and derivatives	Carboxylic acids and derivatives	Amino acids, peptides, and analogues	0	51.1	-	-	1.0763	1.04	0.001339	0.005491	4.7373	4.6351	4.7824	4.8381	4.749	4.4923	4.3148	4.5686	4.5157	4.2961
neg_2318	Lysylhydroxyproline	metab_9301	yes	-	neg	870233-57-1	304.151	2.43663	M+FA-H	C11H21N3O4	0	54.1	HMDB0028952	-	-	-	-	-	Organic acids and derivatives	Carboxylic acids and derivatives	Amino acids, peptides, and analogues	0	54.1	-	-	1.32	1.2838	2.629e-05	0.0003163	4.7025	4.9334	4.6838	4.8181	4.6998	5.2111	5.1735	5.2486	5.1961	5.163
neg_2405	Threonylcysteine	metab_9398	yes	-	neg	186761-52-4	203.049	2.57288	M-H2O-H	C7H14N2O4S	0	32.7	HMDB0029058	-	-	-	-	-	Organic acids and derivatives	Carboxylic acids and derivatives	Amino acids, peptides, and analogues	0	32.7	-	-	1.3343	1.3182	1.997e-05	0.0002605	4.3719	4.4347	4.3278	4.5669	4.4648	4.0616	3.9238	4.0551	3.9742	3.9672
neg_2541	ARGININOSUCCINATE	metab_9545	yes	C03406	neg	2387-71-5	579.242	2.76653	2M-H	C10H18N4O6	0	40.9	HMDB0248585;HMDB0000052	Peptides	Amino acids	map01100;map00220;map00250;map01110;map01230	Metabolism;Metabolism;Metabolism;Metabolism;Metabolism	Global and overview maps;Amino acid metabolism;Amino acid metabolism;Global and overview maps;Global and overview maps	Organic acids and derivatives	Carboxylic acids and derivatives	Amino acids, peptides, and analogues	0	40.9	Metabolic pathways;Arginine biosynthesis;Alanine, aspartate and glutamate metabolism;Biosynthesis of secondary metabolites;Biosynthesis of amino acids	Metabolic pathways;Arginine biosynthesis;Alanine, aspartate and glutamate metabolism;Biosynthesis of secondary metabolites;Biosynthesis of amino acids	1.0626	1.0313	0.0001236	0.0009647	5.4266	5.4065	5.4342	5.4248	5.4382	5.1452	5.1726	5.2419	4.9924	5.1532
neg_2634	Bursopoietin	metab_9646	yes	-	neg	-	360.177	2.89488	M+Na-2H	C14H25N7O3	0	47.8	HMDB0249448;HMDB0249447	-	-	-	-	-	Organic acids and derivatives	Carboxylic acids and derivatives	Amino acids, peptides, and analogues	0	47.8	-	-	1.2126	1.2805	0.02542	0.05277	4.6931	4.2496	4.9383	4.6809	4.9495	4.157	4.3069	4.4972	3.7461	4.3368
neg_2635	Methyl N-({(2s,3s)-3-[(Propylamino)carbonyl]oxiran-2-Yl}carbonyl)-L-Isoleucyl-L-Prolinate	metab_9647	yes	-	neg	-	418.194	2.89488	M+Na-2H	C19H31N3O6	0	35.3	HMDB0249521	-	-	-	-	-	Organic acids and derivatives	Carboxylic acids and derivatives	Amino acids, peptides, and analogues	0	35.3	-	-	1.0354	1.0121	0.002059	0.007581	4.481	4.5852	4.2803	4.4756	4.3284	4.6565	4.7883	4.843	4.6486	4.7157
neg_2643	Gamma-Glutamyltryptophan	metab_9656	yes	-	neg	66471-20-3	332.125	2.90288	M-H	C16H19N3O5	0	46	HMDB0252908;HMDB0029160	-	-	-	-	-	Organic acids and derivatives	Carboxylic acids and derivatives	Amino acids, peptides, and analogues	0	46	-	-	1.0033	0.992	0.007053	0.01927	4.4674	4.3058	4.7194	4.6576	4.6085	4.3387	4.2768	4.1613	4.1538	4.3207
neg_2689	L-Agaritine	metab_9706	yes	-	neg	-	533.236	2.95932	2M-H	C12H17N3O4	0	36	HMDB0033758	-	-	-	-	-	Organic acids and derivatives	Carboxylic acids and derivatives	Amino acids, peptides, and analogues	0	36	-	-	1.4782	1.4329	0.0001273	0.0009866	4.5019	4.1964	4.526	4.5516	4.5026	3.9929	3.8585	4.0162	3.7634	3.8952
neg_2748	Gly-pro-arg-pro	metab_9772	yes	-	neg	-	460.204	3.03972	M+Cl	C18H31N7O5	0	75.4	HMDB0252829	-	-	-	-	-	Organic acids and derivatives	Carboxylic acids and derivatives	Amino acids, peptides, and analogues	0	75.4	-	-	1.8463	1.7991	1.12e-07	5.419e-06	5.4218	5.3196	5.5327	5.4677	5.562	4.6504	4.6615	4.6477	4.5935	4.6978
neg_2801	N-Acetyl-L-methionine	metab_9831	yes	C02712	neg	65-82-7	190.054	3.0956	M-H	C7H13NO3S	0	50.7	HMDB0011745	-	-	-	-	-	Organic acids and derivatives	Carboxylic acids and derivatives	Amino acids, peptides, and analogues	0	50.7	-	-	1.5504	1.5315	4.98e-06	9.751e-05	5.7393	5.7952	5.7262	5.7464	5.7681	5.2539	5.2617	5.1106	4.9871	5.2342
neg_2841	N-Allylglycine	metab_9875	yes	-	neg	-	344.183	3.1441	3M-H	C5H9NO2	0	42.8	HMDB0255080	-	-	-	-	-	Organic acids and derivatives	Carboxylic acids and derivatives	Amino acids, peptides, and analogues	0	42.8	-	-	1.1652	1.142	0.001549	0.00611	4.4419	4.2502	4.5175	4.4694	4.5205	4.0331	4.0693	4.1329	3.8683	4.2414
neg_2967	Amphibine H	metab_10013	yes	-	neg	52659-55-9	640.295	3.28068	M+Cl	C33H43N5O6	0	81.8	HMDB0029333	-	-	-	-	-	Organic acids and derivatives	Carboxylic acids and derivatives	Amino acids, peptides, and analogues	0	81.8	-	-	1.1419	1.121	2.654e-05	0.0003173	5.4866	5.4815	5.5183	5.5084	5.5647	5.2131	5.162	5.1972	5.294	5.0818
neg_3013	Seryltryptophan	metab_10066	yes	-	neg	94421-70-2	290.115	3.33663	M-H	C14H17N3O4	0	46.5	HMDB0029050	-	-	-	-	-	Organic acids and derivatives	Carboxylic acids and derivatives	Amino acids, peptides, and analogues	0	46.5	-	-	1.5586	1.528	3.181e-05	0.0003599	2.7969	2.7842	2.7908	2.841	2.8607	3.2691	3.4178	3.2439	3.5512	3.5849
neg_3095	(3R-(3alpha,4alpha(2R*,3R*),5beta,6beta))-5-Methoxy-4-(2-methyl-3-(3-methyl-2-butenyl)oxiranyl)-1-oxaspiro(2.5)octan-6-ol carbamate	metab_10155	yes	-	neg	-	360.156	3.44182	M+Cl	C17H27NO5	0	34.8	HMDB0260151	-	-	-	-	-	Organic acids and derivatives	Carboxylic acids and derivatives	Amino acids, peptides, and analogues	0	34.8	-	-	1.5371	1.5743	0.01807	0.04026	4.2611	3.0422	4.3352	3.8933	4.2642	3.0964	3.0603	3.4164	3.3907	3.0421
neg_3154	L-Arginine, L-asparaginylglycyl-	metab_10220	yes	-	neg	-	380.146	3.5138	M+Cl	C12H23N7O5	0	39.1	HMDB0253872	-	-	-	-	-	Organic acids and derivatives	Carboxylic acids and derivatives	Amino acids, peptides, and analogues	0	39.1	-	-	1.2858	1.2532	1.165e-06	3.377e-05	5.1473	5.0769	5.1551	5.1683	5.1995	4.7579	4.7316	4.7919	4.8071	4.6789
neg_3180	Histidylarginine	metab_10249	yes	-	neg	77369-21-2	681.358	3.54583	2M+Hac-H	C12H21N7O3	0	35.8	HMDB0028879	-	-	-	-	-	Organic acids and derivatives	Carboxylic acids and derivatives	Amino acids, peptides, and analogues	0	35.8	-	-	1.3179	1.2776	0.008042	0.02131	4.6944	4.6745	4.4967	4.6718	4.6334	3.6358	3.9973	4.4728	4.266	4.2251
neg_3184	L-cis-Cyclo(aspartylphenylalanyl)	metab_10253	yes	-	neg	5262-10-02	261.088	3.55382	M-H	C13H14N2O4	0	36.7	HMDB0031360	-	-	-	-	-	Organic acids and derivatives	Carboxylic acids and derivatives	Amino acids, peptides, and analogues	0	36.7	-	-	1.0444	1.0637	0.006969	0.01909	5.2227	5.545	5.061	5.3221	5.068	5.5968	5.5567	5.5718	5.5942	5.5324
neg_3186	Trandolaprilat	metab_10255	yes	C21515	neg	-	401.204	3.55382	M-H	C22H30N2O5	0	53.1	PW_C040469;HMDB0060583;HMDB0247506	-	-	-	-	-	Organic acids and derivatives	Carboxylic acids and derivatives	Amino acids, peptides, and analogues	0	53.1	-	-	1.2794	1.2982	0.00826	0.02174	4.5221	4.0286	4.7423	4.6104	4.776	4.0965	3.9292	4.1666	3.976	4.0501
neg_3251	Citrusin II	metab_10325	yes	-	neg	-	693.321	3.61042	M-H2O-H	C37H44N8O7	0	42.2	HMDB0303681	-	-	-	-	-	Organic acids and derivatives	Carboxylic acids and derivatives	Amino acids, peptides, and analogues	0	42.2	-	-	1.1308	1.1043	0.0007124	0.003422	4.7454	4.9014	4.8748	4.947	4.9482	4.5664	4.377	4.6813	4.4942	4.6048
neg_3295	Trans-4-Aminocyclohexanecarboxylic acid	metab_10372	yes	-	neg	-	188.092	3.67283	M+FA-H	C7H13NO2	0	46.3	HMDB0246355	-	-	-	-	-	Organic acids and derivatives	Carboxylic acids and derivatives	Amino acids, peptides, and analogues	0	46.3	-	-	1.1539	1.121	1.067e-06	3.156e-05	5.3827	5.2867	5.3516	5.3729	5.348	5.0103	5.0644	5.0693	4.9754	5.033
neg_3326	Glutathione peroxide	metab_10406	yes	-	neg	-	372.025	3.713	M+Cl	C10H15N3O8S	0	39.5	HMDB0252820	-	-	-	-	-	Organic acids and derivatives	Carboxylic acids and derivatives	Amino acids, peptides, and analogues	0	39.5	-	-	1.1931	1.1701	0.0007153	0.003433	4.6132	4.7429	4.4692	4.77	4.4896	5.0229	4.9557	4.9656	5.1231	4.9202
neg_3374	DL-Allylglycine	metab_10459	yes	-	neg	-	344.183	3.77698	3M-H	C5H9NO2	0	51.7	HMDB0251510	-	-	-	-	-	Organic acids and derivatives	Carboxylic acids and derivatives	Amino acids, peptides, and analogues	0	51.7	-	-	1.0511	1.0486	0.004872	0.01473	5.2075	4.8949	5.2801	5.1895	5.2747	4.854	4.7387	4.9763	4.7795	4.905
neg_3399	Fructosyl-lysine	metab_10486	yes	C16488	neg	21291-40-7	289.14	3.817	M-H2O-H	C12H24N2O7	0	55.5	HMDB0252495;HMDB0242138;HMDB0034879	-	-	map02060	Environmental Information Processing	Membrane transport	Organic acids and derivatives	Carboxylic acids and derivatives	Amino acids, peptides, and analogues	0	55.5	Phosphotransferase system (PTS)	Phosphotransferase system (PTS)	1.7908	1.7414	6.792e-06	0.0001245	3.908	4.1035	3.6876	3.8723	3.7393	4.6231	4.7129	4.6674	4.5971	4.6135
neg_3414	Asparaginyl-Threonine	metab_10504	yes	-	neg	-	465.199	3.84917	2M-H	C8H15N3O5	0	60.2	HMDB0028741	-	-	-	-	-	Organic acids and derivatives	Carboxylic acids and derivatives	Amino acids, peptides, and analogues	0	60.2	-	-	1.8325	1.7992	0.001757	0.006718	5.1828	4.3222	5.2453	5.0893	5.226	3.9459	3.8508	4.395	4.1122	4.1862
neg_3434	Paracetamol mercapturate	metab_10526	yes	-	neg	-	295.076	3.87317	M-H	C13H16N2O4S	0	32.9	HMDB0256121;HMDB0242140	-	-	-	-	-	Organic acids and derivatives	Carboxylic acids and derivatives	Amino acids, peptides, and analogues	0	32.9	-	-	1.1979	1.1984	0.01123	0.02752	3.6813	3.5893	3.4323	3.7071	3.6622	3.5102	3.4372	3.0293	2.924	2.9296
neg_3663	Pivagabine	metab_10775	yes	-	neg	-	168.102	4.17303	M-H2O-H	C9H17NO3	0	33.5	HMDB0246575	-	-	-	-	-	Organic acids and derivatives	Carboxylic acids and derivatives	Amino acids, peptides, and analogues	0	33.5	-	-	1.4844	1.4625	0.04281	0.08104	4.4665	4.3021	4.5129	4.4509	4.5142	2.7911	4.1239	4.2461	2.942	4.1995
neg_370	Glycyl-Glutamate	metab_10815	yes	-	neg	-	225.049	0.608917	M+Na-2H, M+K-2H	C7H12N2O5	0	33.4	HMDB0028840	-	-	-	-	-	Organic acids and derivatives	Carboxylic acids and derivatives	Amino acids, peptides, and analogues	0	33.4	-	-	1.8469	1.7988	0.0003884	0.00219	4.3104	3.9529	4.388	4.1674	4.6212	3.746	3.0865	3.4001	3.3777	3.3656
neg_3718	S-Formylglutathione	metab_10834	yes	C01031	neg	50409-81-9	316.061	4.24505	M-H2O-H	C11H17N3O7S	0	42.4	HMDB0001550	-	-	map00680;map01100;map01120	Metabolism;Metabolism;Metabolism	Energy metabolism;Global and overview maps;Global and overview maps	Organic acids and derivatives	Carboxylic acids and derivatives	Amino acids, peptides, and analogues	0	42.4	Methane metabolism;Metabolic pathways;Microbial metabolism in diverse environments	Methane metabolism;Metabolic pathways;Microbial metabolism in diverse environments	1.6797	1.6295	7.903e-06	0.0001368	4.4133	4.0536	4.4327	4.3128	4.3241	3.6252	3.6345	3.6263	3.6106	3.6162
neg_3736	Valyl-prolyl-glycyl-valyl-glycine	metab_10853	yes	-	neg	-	472.241	4.27705	M+FA-H	C19H33N5O6	0	76.1	HMDB0259877	-	-	-	-	-	Organic acids and derivatives	Carboxylic acids and derivatives	Amino acids, peptides, and analogues	0	76.1	-	-	2.1212	2.0597	2.813e-05	0.0003292	5.8843	5.2553	5.9298	5.7405	5.9149	4.651	4.6468	4.6209	4.7229	4.532
neg_3759	N-Heptanoylglycine	metab_10877	yes	-	neg	23783-23-5	168.102	4.32505	M-H2O-H	C9H17NO3	0	45.7	HMDB0013010	-	-	-	-	-	Organic acids and derivatives	Carboxylic acids and derivatives	Amino acids, peptides, and analogues	0	45.7	-	-	1.5898	1.5778	0.03144	0.06292	4.7729	4.5013	4.8165	4.8004	4.9716	3.1146	4.412	4.4335	3.1	4.4564
neg_3793	HBOA trihexose	metab_10915	yes	C08283	neg	-	202.108	4.36505	M+FA-H	C8H15NO2	0	31.9	HMDB0304552	-	-	-	-	-	Organic acids and derivatives	Carboxylic acids and derivatives	Amino acids, peptides, and analogues	0	31.9	-	-	2.2478	2.1897	1.147e-06	3.334e-05	4.7928	4.5829	4.8017	4.858	4.8313	3.4038	3.6702	3.5415	3.3892	3.8031
neg_381	L-Aspartate-semialdehyde	metab_10934	yes	C00441	neg	2338-03-06	233.078	0.616867	2M-H, 2M+Hac-H	C4H7NO3	0	32	HMDB0012249	-	-	map01100;map00998;map00997;map00300;map01120;map01210;map00270;map00330;map01230;map01110;map00260;map00261;map00400	Metabolism;Metabolism;Metabolism;Metabolism;Metabolism;Metabolism;Metabolism;Metabolism;Metabolism;Metabolism;Metabolism;Metabolism;Metabolism	Global and overview maps;Biosynthesis of other secondary metabolites;Biosynthesis of other secondary metabolites;Amino acid metabolism;Global and overview maps;Global and overview maps;Amino acid metabolism;Amino acid metabolism;Global and overview maps;Global and overview maps;Amino acid metabolism;Biosynthesis of other secondary metabolites;Amino acid metabolism	Organic acids and derivatives	Carboxylic acids and derivatives	Amino acids, peptides, and analogues	0	32	Metabolic pathways;Biosynthesis of various antibiotics;Biosynthesis of various other secondary metabolites;Lysine biosynthesis;Microbial metabolism in diverse environments;2-Oxocarboxylic acid metabolism;Cysteine and methionine metabolism;Arginine and proline metabolism;Biosynthesis of amino acids;Biosynthesis of secondary metabolites;Glycine, serine and threonine metabolism;Monobactam biosynthes…	Metabolic pathways;Biosynthesis of various antibiotics;Biosynthesis of various other secondary metabolites;Lysine biosynthesis;Microbial metabolism in diverse environments;2-Oxocarboxylic acid metabolism;Cysteine and methionine metabolism;Arginine and proline metabolism;Biosynthesis of amino acids;Biosynthesis of secondary metabolites;Glycine, serine and threonine metabolism;Monobactam biosynthes…	1.1641	1.2128	0.02118	0.04565	4.4182	4.1189	4.8983	4.38	4.8711	4.0648	4.2215	3.9476	4.0115	4.1676
neg_3890	2-n-Propylthiazolidine-4-carboxylic acid	metab_11018	yes	-	neg	-	174.059	4.52538	M-H	C7H13NO2S	0	35.5	HMDB0245245	-	-	-	-	-	Organic acids and derivatives	Carboxylic acids and derivatives	Amino acids, peptides, and analogues	0	35.5	-	-	1.0875	1.0526	0.01028	0.02573	5.8672	5.877	5.7905	5.9216	5.8924	5.3455	5.6161	5.7274	5.1779	5.6782
neg_3907	Semagacestat	metab_11037	yes	-	neg	-	406.198	4.5494	M+FA-H	C19H27N3O4	0	55.2	HMDB0258218	-	-	-	-	-	Organic acids and derivatives	Carboxylic acids and derivatives	Amino acids, peptides, and analogues	0	55.2	-	-	1.914	1.8798	0.001798	0.00683	4.3146	3.3321	4.3973	4.456	4.4802	3.1753	3.2593	3.1387	3.2486	3.1286
neg_3956	Gluten exorphin C	metab_11089	yes	-	neg	-	704.348	4.63793	M+K-2H	C29H57N5O12	0	76.8	HMDB0059796	-	-	-	-	-	Organic acids and derivatives	Carboxylic acids and derivatives	Amino acids, peptides, and analogues	0	76.8	-	-	2.3221	2.2593	0.000229	0.001467	4.6526	4.6923	4.5805	4.6832	4.7075	2.4706	3.4152	3.626	3.2454	3.6657
neg_3980	Tranexamic Acid	metab_11116	yes	C12535	neg	1197-18-8	202.108	4.67915	M+FA-H	C8H15NO2	0	55.3	PW_C008836;HMDB0014447;MJDBOTE0000780	-	-	-	-	-	Organic acids and derivatives	Carboxylic acids and derivatives	Amino acids, peptides, and analogues	0	55.3	-	-	2.0148	1.9663	4.409e-09	4.223e-07	5.5443	5.4749	5.6609	5.5912	5.5575	4.5552	4.6579	4.6478	4.5816	4.6079
neg_3998	N-(9H-Fluoren-9-ylacetyl)-L-phenylalanine	metab_11134	yes	-	neg	-	392.128	4.72515	M+Na-2H	C24H21NO3	0	45	HMDB0255020	-	-	-	-	-	Organic acids and derivatives	Carboxylic acids and derivatives	Amino acids, peptides, and analogues	0	45	-	-	1.5641	1.5392	4.452e-06	8.955e-05	5.5865	5.5755	5.6184	5.7661	5.6372	5.1871	4.9869	5.0372	5.0749	4.9399
neg_4057	Glycyl-prolyl-arginyl-valyl-valyl-glutamic acid	metab_11201	yes	-	neg	-	676.334	4.83802	M+Na-2H	C28H49N9O9	0	70.2	HMDB0252831	-	-	-	-	-	Organic acids and derivatives	Carboxylic acids and derivatives	Amino acids, peptides, and analogues	0	70.2	-	-	2.4936	2.4337	1.564e-07	7.041e-06	6.0197	5.7685	6.0078	6.0117	6.0164	4.3993	4.3819	4.4856	4.4037	4.7695
neg_4075	N-lactoyl-phenylalanine	metab_11220	yes	-	neg	183241-73-8	236.093	4.86625	M-H	C12H15NO4	37.1	0	HMDB0062175	-	-	-	-	-	Organic acids and derivatives	Carboxylic acids and derivatives	Amino acids, peptides, and analogues	37.1	0	-	-	1.3707	1.3303	1.377e-05	0.0002011	5.0196	4.9748	5.1976	5.023	5.0156	4.5659	4.5586	4.6533	4.5027	4.6572
neg_4096	Cyclo(D-trp-D-asp-pro-D-val-leu)	metab_11243	yes	-	neg	-	655.31	4.91668	M+FA-H	C31H42N6O7	0	57.2	HMDB0249361	-	-	-	-	-	Organic acids and derivatives	Carboxylic acids and derivatives	Amino acids, peptides, and analogues	0	57.2	-	-	3.332	3.3072	2.402e-05	0.000296	5.2361	5.2716	5.251	5.246	5.2485	2.1984	2.2076	2.1994	3.7737	2.1894
neg_4179	Moexipril	metab_11335	yes	C07704	neg	103775-10-6	479.215	5.11945	M-H2O-H	C27H34N2O7	0	37.7	HMDB0257333;PW_C009168;HMDB0014829	-	-	-	-	-	Organic acids and derivatives	Carboxylic acids and derivatives	Amino acids, peptides, and analogues	0	37.7	-	-	2.4309	2.378	1.242e-09	1.685e-07	5.966	5.7674	5.9381	5.9802	5.9677	4.5868	4.5755	4.5208	4.4826	4.5009
neg_4214	3-Hydroxymugineic acid	metab_11374	yes	-	neg	74235-23-7	335.107	5.20792	M-H	C12H20N2O9	0	31.1	HMDB0033927	-	-	-	-	-	Organic acids and derivatives	Carboxylic acids and derivatives	Amino acids, peptides, and analogues	0	31.1	-	-	2.7499	2.6825	2.283e-08	1.599e-06	4.6782	4.3734	4.75	4.8733	4.71	2.8948	2.904	2.8958	2.8802	2.8857
neg_4254	Coenzyme B	metab_11418	yes	C04628	neg	104302-77-4	342.076	5.26132	M-H	C11H22NO7PS	0	31.4	HMDB0304798	Vitamins and cofactors	Cofactors	map00680;map01100;map01200;map01120;map01240	Metabolism;Metabolism;Metabolism;Metabolism;Metabolism	Energy metabolism;Global and overview maps;Global and overview maps;Global and overview maps;Global and overview maps	Organic acids and derivatives	Carboxylic acids and derivatives	Amino acids, peptides, and analogues	0	31.4	Methane metabolism;Metabolic pathways;Carbon metabolism;Microbial metabolism in diverse environments;Biosynthesis of cofactors	Methane metabolism;Metabolic pathways;Carbon metabolism;Microbial metabolism in diverse environments;Biosynthesis of cofactors	1.2032	1.1781	0.0001846	0.001271	5.1532	5.1581	5.1367	5.3337	5.241	4.9649	4.78	4.9112	4.7693	4.7541
neg_4313	Valaciclovir	metab_11484	yes	C07184	neg	124832-27-5	647.308	5.36468	2M-H	C13H20N6O4	0	39.7	HMDB0014716	-	-	map04976	Organismal Systems	Digestive system	Organic acids and derivatives	Carboxylic acids and derivatives	Amino acids, peptides, and analogues	0	39.7	Bile secretion	Bile secretion	2.462	2.4256	6.331e-07	2.111e-05	5.2554	5.1911	5.2659	5.4407	5.3751	3.7915	3.9884	3.5103	3.9627	4.0014
neg_4339	Vignatic acid B	metab_11511	yes	-	neg	181485-20-1	540.267	5.4122	M+Na-2H	C27H41N3O7	0	40.6	HMDB0033617	-	-	-	-	-	Organic acids and derivatives	Carboxylic acids and derivatives	Amino acids, peptides, and analogues	0	40.6	-	-	1.8536	1.8503	7.178e-06	0.0001298	4.023	4.162	4.3653	4.0615	4.4104	4.9663	5.0525	5.0501	5.0892	5.0173
neg_4414	(2S,3As,6aS)-1-[(2R)-2-carboxy-2-[[(2S)-1-ethoxy-1-oxo-4-phenylbutan-2-yl]amino]acetyl]-3,3a,4,5,6,6a-hexahydro-2H-cyclopenta[b]pyrrole-2-carboxylic acid	metab_11594	yes	-	neg	-	427.183	5.50802	M-H2O-H	C23H30N2O7	0	51.2	HMDB0257995	-	-	-	-	-	Organic acids and derivatives	Carboxylic acids and derivatives	Amino acids, peptides, and analogues	0	51.2	-	-	1.0814	1.065	1.272e-06	3.607e-05	4.9534	4.9019	4.9424	4.9025	4.9381	5.2028	5.2214	5.1783	5.2733	5.1645
neg_542	Prolyl-Asparagine	metab_12674	yes	-	neg	-	517.227	2.8224	2M-H, 2M+Hac-H	C9H15N3O4	0	74.6	HMDB0029012	-	-	-	-	-	Organic acids and derivatives	Carboxylic acids and derivatives	Amino acids, peptides, and analogues	0	74.6	-	-	2.0769	2.0158	2.186e-05	0.000276	5.5072	5.2069	5.7713	5.7843	5.8078	4.5388	4.4751	4.6576	4.6011	4.5056
neg_5712	N-Oleoyl Glutamic acid	metab_12990	yes	-	neg	-	410.29	5.92508	M-H	C23H41NO5	0	38.8	HMDB0241959;LMFA08020088	-	-	-	-	-	Organic acids and derivatives	Carboxylic acids and derivatives	Amino acids, peptides, and analogues	0	38.8	-	-	1.1185	1.0826	0.001111	0.004774	5.1662	4.8724	5.1039	5.0781	5.12	4.7709	4.6739	4.8222	4.8102	4.5905
neg_575	Arginyl-prolyl-proline	metab_13031	yes	-	neg	-	403.183	2.97525	M+Cl, M+FA-H	C16H28N6O4	0	45.8	HMDB0249363	-	-	-	-	-	Organic acids and derivatives	Carboxylic acids and derivatives	Amino acids, peptides, and analogues	0	45.8	-	-	1.2075	1.1871	0.0006429	0.003174	5.6487	5.4857	5.8326	5.647	5.8648	5.2823	5.2903	5.3728	5.3232	5.2767
neg_6214	Aspartyl-Tryptophan	metab_13523	yes	-	neg	-	637.226	5.516	2M-H	C15H17N3O5	0	46.1	HMDB0028764	-	-	-	-	-	Organic acids and derivatives	Carboxylic acids and derivatives	Amino acids, peptides, and analogues	0	46.1	-	-	1.5264	1.5087	0.0001789	0.001242	5.022	4.966	5.0014	5.0069	5.0162	4.6151	4.2999	4.4487	4.5603	4.1197
neg_639	N-Methyl-L-Glutamic Acid	metab_13713	yes	C01046	neg	35989-16-3	160.061	0.94435	M-H, M+Cl	C6H11NO4	47.9	0	HMDB0062660	-	-	map00680;map01100;map01120	Metabolism;Metabolism;Metabolism	Energy metabolism;Global and overview maps;Global and overview maps	Organic acids and derivatives	Carboxylic acids and derivatives	Amino acids, peptides, and analogues	47.9	0	Methane metabolism;Metabolic pathways;Microbial metabolism in diverse environments	Methane metabolism;Metabolic pathways;Microbial metabolism in diverse environments	1.0949	1.0636	2.684e-06	6.245e-05	5.8424	5.7567	5.8821	5.8511	5.8904	5.5408	5.5715	5.5742	5.5432	5.5478
neg_6478	Proline glutamate	metab_13811	yes	-	neg	-	281.073	5.1481	M+Na-2H	C10H16N2O6	0	30.7	HMDB0256798	-	-	-	-	-	Organic acids and derivatives	Carboxylic acids and derivatives	Amino acids, peptides, and analogues	0	30.7	-	-	1.965	1.921	1.525e-06	4.14e-05	3.4878	3.6294	3.7448	3.8824	3.8629	2.7942	2.8034	2.7952	2.7796	2.7851
neg_6503	Elamipretide	metab_13839	yes	-	neg	-	676.334	5.09485	M+K-2H	C32H49N9O5	0	75.7	HMDB0251733	-	-	-	-	-	Organic acids and derivatives	Carboxylic acids and derivatives	Amino acids, peptides, and analogues	0	75.7	-	-	1.4365	1.396	2.469e-06	5.855e-05	5.4707	5.3713	5.466	5.4824	5.5149	4.8874	4.8813	5.0548	5.0029	5.0016
neg_6504	Teleocidin B 2	metab_13840	yes	-	neg	-	488.272	5.09485	M+K-2H	C28H41N3O2	0	58.4	HMDB0258787	-	-	-	-	-	Organic acids and derivatives	Carboxylic acids and derivatives	Amino acids, peptides, and analogues	0	58.4	-	-	1.0894	1.0562	5.211e-05	0.000518	5.6685	5.6163	5.6327	5.6952	5.7085	5.3575	5.3479	5.4983	5.3443	5.3041
neg_6636	Histidyltryptophan	metab_13986	yes	-	neg	23403-90-9	362.121	4.81178	M+Na-2H	C17H19N5O3	0	53.4	HMDB0028896	-	-	-	-	-	Organic acids and derivatives	Carboxylic acids and derivatives	Amino acids, peptides, and analogues	0	53.4	-	-	1.2228	1.2462	0.009754	0.02464	3.8909	3.5418	4.3214	4.0853	4.189	3.5507	3.5599	3.5518	3.5361	3.5417
neg_6640	(2R)-2-[[(2R)-2-amino-3-(1-methoxycarbonylindol-3-yl)propanoyl]-[(2S)-2-[[(2R,6S)-2,6-dimethylpiperidine-1-carbonyl]amino]-4,4-dimethylpentanoyl]amino]hexanoic acid	metab_13991	yes	-	neg	-	662.352	4.79768	M+Na-2H	C34H51N5O7	0	44.4	HMDB0260055	-	-	-	-	-	Organic acids and derivatives	Carboxylic acids and derivatives	Amino acids, peptides, and analogues	0	44.4	-	-	1.9314	1.8931	1.533e-06	4.15e-05	5.1578	5.2288	5.1418	5.1841	5.1991	4.0202	4.3185	4.4235	4.3584	4.3205
neg_6795	Cilastatin	metab_14160	yes	C01675	neg	82009-34-5	379.129	4.5414	M+Na-2H	C16H26N2O5S	0	48.2	HMDB0015535;HMDB0247784;MJDBOTE0001591	-	-	-	-	-	Organic acids and derivatives	Carboxylic acids and derivatives	Amino acids, peptides, and analogues	0	48.2	-	-	2.5818	2.5235	0.002802	0.009656	3.5846	3.9792	4.0573	4.1871	3.9297	3.2363	1.4007	3.0146	1.3778	1.3832
neg_6936	Tyr-D-thr-gly-phe-leu-thr	metab_14314	yes	-	neg	-	721.316	4.35705	M+Na-2H	C34H48N6O10	0	86.4	HMDB0251632	-	-	-	-	-	Organic acids and derivatives	Carboxylic acids and derivatives	Amino acids, peptides, and analogues	0	86.4	-	-	1.3401	1.2961	0.001058	0.004602	4.6541	4.5521	4.8346	4.6638	4.5759	4.155	4.0661	4.3542	3.943	4.3664
neg_6978	Phenylalanylglutamic acid	metab_14355	yes	-	neg	3617-45-6	275.104	4.31705	M-H2O-H	C14H18N2O5	0	42.3	HMDB0028994	-	-	-	-	-	Organic acids and derivatives	Carboxylic acids and derivatives	Amino acids, peptides, and analogues	0	42.3	-	-	1.051	1.0216	0.000861	0.003946	4.1934	4.4485	4.2171	4.3341	4.2501	4.5972	4.6693	4.6014	4.5831	4.4654
neg_6992	N-({(1s,2r)-2-[(S)-[(1r)-1-{[(Benzyloxy)carbonyl]amino}-2-Phenylethyl](Hydroxy)phosphoryl]cyclopentyl}carbonyl)-L-Tryptophan	metab_14371	yes	-	neg	-	598.215	4.29305	M-H2O-H	C33H36N3O7P	0	76.7	HMDB0257370	-	-	-	-	-	Organic acids and derivatives	Carboxylic acids and derivatives	Amino acids, peptides, and analogues	0	76.7	-	-	2.6558	2.6361	0.004053	0.01285	5.9249	3.4254	6.0196	5.8677	6.0054	3.4343	3.4436	3.4354	3.4197	3.4253
neg_707	Glabrin A	metab_14455	yes	-	neg	162157-00-8	174.077	0.62485	M-H, M+K-2H	C7H13NO4	0	33.3	HMDB0301777	-	-	-	-	-	Organic acids and derivatives	Carboxylic acids and derivatives	Amino acids, peptides, and analogues	0	33.3	-	-	1.8243	1.7943	1.156e-07	5.535e-06	4.8335	4.7962	4.8149	4.8525	4.8394	3.9206	4.1242	3.9408	4.1226	4.0715
neg_7138	N-alpha-Acetyl-L-citrulline	metab_14530	yes	C15532	neg	33965-42-3	479.215	4.12503	2M+FA-H	C8H15N3O4	0	71.8	HMDB0000856	-	-	map01100;map00220;map01230	Metabolism;Metabolism;Metabolism	Global and overview maps;Amino acid metabolism;Global and overview maps	Organic acids and derivatives	Carboxylic acids and derivatives	Amino acids, peptides, and analogues	0	71.8	Metabolic pathways;Arginine biosynthesis;Biosynthesis of amino acids	Metabolic pathways;Arginine biosynthesis;Biosynthesis of amino acids	1.325	1.2961	0.0006178	0.003077	5.6167	5.2683	5.6896	5.6349	5.7432	5.1519	5.0623	5.1474	5.1433	5.1318
neg_7241	Small bacteriocin	metab_14642	yes	-	neg	172617-17-3	362.175	4.01303	M+K-2H	C18H31NO4	0	54.9	HMDB0033503	-	-	-	-	-	Organic acids and derivatives	Carboxylic acids and derivatives	Amino acids, peptides, and analogues	0	54.9	-	-	1.0791	1.0809	0.006773	0.01872	4.2637	4.1744	4.5699	4.2621	4.6447	3.9951	3.969	4.0795	4.091	4.0301
neg_7242	Aspartyl-Asparagine	metab_14643	yes	-	neg	-	284.027	4.01303	M+K-2H	C8H13N3O6	0	34.4	HMDB0028748	-	-	-	-	-	Organic acids and derivatives	Carboxylic acids and derivatives	Amino acids, peptides, and analogues	0	34.4	-	-	1.1452	1.1246	0.002435	0.008632	5.2507	4.9827	5.2088	5.2682	5.2878	4.7824	4.9608	4.9475	4.6204	4.8635
neg_7458	L-Canaline	metab_14880	yes	C08270	neg	496-93-5	401.204	3.76898	3M-H	C4H10N2O3	0	50.7	HMDB0012251	-	-	-	-	-	Organic acids and derivatives	Carboxylic acids and derivatives	Amino acids, peptides, and analogues	0	50.7	-	-	2.1076	2.0825	0.001557	0.006136	4.6204	3.6012	4.8791	4.4856	4.9441	3.2018	3.6173	3.0699	3.1506	3.3844
neg_7459	L-Proline, 1-acetyl-4-hydroxy-, cis-	metab_14881	yes	-	neg	-	345.13	3.76898	2M-H	C7H11NO4	0	34.8	HMDB0253913	-	-	-	-	-	Organic acids and derivatives	Carboxylic acids and derivatives	Amino acids, peptides, and analogues	0	34.8	-	-	1.1984	1.1763	3.782e-06	7.992e-05	4.526	4.6141	4.5428	4.6764	4.5966	4.9188	4.9648	4.9842	4.9349	4.8942
neg_7463	Cyclo(aspartylleucylthreonylvalyltyrosylphenylalanylglycyl)	metab_14886	yes	-	neg	-	794.369	3.76098	M-H	C39H53N7O11	0	76	HMDB0303713	-	-	-	-	-	Organic acids and derivatives	Carboxylic acids and derivatives	Amino acids, peptides, and analogues	0	76	-	-	1.4137	1.4004	0.0001341	0.001022	4.7839	4.9576	4.8772	4.9603	4.6643	4.3538	4.4209	4.4737	4.2191	4.262
neg_7485	Threoninyl-Tryptophan	metab_14909	yes	-	neg	186761-42-2	304.13	3.745	M-H	C15H19N3O4	0	31.9	HMDB0029072;HMDB0304790	-	-	-	-	-	Organic acids and derivatives	Carboxylic acids and derivatives	Amino acids, peptides, and analogues	0	31.9	-	-	1.4857	1.449	2.429e-07	1.023e-05	4.0748	4.1846	4.0246	4.062	4.0083	4.5878	4.584	4.644	4.5793	4.5924
neg_7663	Hydroxyprolylhydroxyproline	metab_15103	yes	-	neg	21768-17-2	533.209	3.56182	2M+FA-H	C10H16N2O5	0	67.8	HMDB0028864	-	-	-	-	-	Organic acids and derivatives	Carboxylic acids and derivatives	Amino acids, peptides, and analogues	0	67.8	-	-	1.1963	1.1712	3.941e-07	1.453e-05	5.15	5.114	5.1114	5.1914	5.1904	4.8064	4.767	4.8421	4.8435	4.7943
neg_7665	Tryptophyl-Glutamine	metab_15105	yes	-	neg	-	377.146	3.56182	M+FA-H	C16H20N4O4	0	64.8	HMDB0029081	-	-	-	-	-	Organic acids and derivatives	Carboxylic acids and derivatives	Amino acids, peptides, and analogues	0	64.8	-	-	1.1838	1.1635	9.598e-10	1.4e-07	4.9718	4.9673	4.9873	4.9744	4.9476	5.3167	5.3002	5.2979	5.3133	5.2713
neg_7727	[3H]Pemetrexed	metab_15173	yes	-	neg	-	472.147	3.49782	M+FA-H	C20H21N5O6	0	43.2	HMDB0243759	-	-	-	-	-	Organic acids and derivatives	Carboxylic acids and derivatives	Amino acids, peptides, and analogues	0	43.2	-	-	1.3452	1.3303	0.003349	0.01108	4.9326	4.3475	4.9701	4.988	4.9751	4.3337	4.343	4.3348	4.3191	4.3247
neg_7784	(3xi,6xi)-Cyclo(alanylvalyl)	metab_15233	yes	-	neg	-	215.103	3.44182	M+FA-H	C8H14N2O2	0	32.1	HMDB0033926	-	-	-	-	-	Organic acids and derivatives	Carboxylic acids and derivatives	Amino acids, peptides, and analogues	0	32.1	-	-	1.7359	1.6887	0.0003871	0.002185	4.2798	3.721	4.3065	4.262	4.3813	3.5351	3.2805	3.2249	3.5019	3.4762
neg_785	Isoleucyl-prolyl-arginine-4-nitroanilide	metab_15306	yes	-	neg	-	503.272	3.79298	M-H, M+Na-2H	C23H36N8O5	0	48.3	HMDB0250210	-	-	-	-	-	Organic acids and derivatives	Carboxylic acids and derivatives	Amino acids, peptides, and analogues	0	48.3	-	-	1.1799	1.1456	4.096e-05	0.0004331	4.8351	5.0207	4.7962	4.8508	4.8505	5.2518	5.1598	5.2061	5.2567	5.2026
neg_7867	Morphiceptin	metab_15325	yes	-	neg	74135-04-9	566.259	3.34463	M+FA-H	C28H35N5O5	0	62.2	HMDB0005777	-	-	-	-	-	Organic acids and derivatives	Carboxylic acids and derivatives	Amino acids, peptides, and analogues	0	62.2	-	-	1.4177	1.4207	3.098e-05	0.0003528	5.0496	5.1219	5.0424	5.0618	4.9885	4.5472	4.7236	4.377	4.528	4.5879
neg_7885	Argatroban	metab_15344	yes	C04931	neg	74863-84-6	529.226	3.32863	M+Na-2H	C23H36N6O5S	0	42.4	PW_C008815;HMDB0014423	-	-	-	-	-	Organic acids and derivatives	Carboxylic acids and derivatives	Amino acids, peptides, and analogues	0	42.4	-	-	1.1968	1.178	1.046e-06	3.106e-05	5.1744	5.1564	5.0695	5.1337	5.1319	4.7569	4.7863	4.8646	4.7749	4.7735
neg_7991	Hexanoylglycine	metab_15460	yes	-	neg	24003-67-6	154.087	3.23213	M-H2O-H	C8H15NO3	0	38.6	HMDB0000701	-	-	-	-	-	Organic acids and derivatives	Carboxylic acids and derivatives	Amino acids, peptides, and analogues	0	38.6	-	-	1.6253	1.5916	0.03265	0.06498	4.2569	4.1291	4.3113	4.3408	4.3267	2.5136	3.8441	3.989	2.499	3.9695
neg_8007	Imazamox	metab_15479	yes	C18598	neg	114311-32-9	350.136	3.21612	M+FA-H	C15H19N3O4	0	42.8	HMDB0253404	-	-	-	-	-	Organic acids and derivatives	Carboxylic acids and derivatives	Amino acids, peptides, and analogues	0	42.8	-	-	1.0143	1.0363	0.008766	0.02278	5.2746	4.9452	5.4292	5.1749	5.4276	4.9344	4.9297	4.9714	4.944	4.9079
neg_8058	Val-Pro-Asp-Pro-Arg	metab_15534	yes	-	neg	-	627.311	3.1601	M+FA-H	C25H42N8O8	0	78.9	HMDB0244421	-	-	-	-	-	Organic acids and derivatives	Carboxylic acids and derivatives	Amino acids, peptides, and analogues	0	78.9	-	-	1.201	1.2042	0.004815	0.01461	4.4601	4.3696	4.2447	4.4499	4.2278	3.9073	3.5938	4.0812	4.1313	3.9805
neg_8098	Pegvaliase-Pqpz	metab_15578	yes	-	neg	-	355.162	3.12012	M+K-2H	C15H30N2O5	0	32.7	HMDB0304893	-	-	-	-	-	Organic acids and derivatives	Carboxylic acids and derivatives	Amino acids, peptides, and analogues	0	32.7	-	-	2.1086	2.0587	0.0007327	0.003494	4.832	4.1595	4.9046	4.7016	4.9359	3.5146	3.9519	3.8481	3.03	3.2979
neg_8141	Glycylserylprolylmethionylphenylalanylvalinamide	metab_15627	yes	-	neg	115525-98-9	656.29	3.07962	M+Na-2H	C29H45N7O7S	0	83.2	HMDB0033242	-	-	-	-	-	Organic acids and derivatives	Carboxylic acids and derivatives	Amino acids, peptides, and analogues	0	83.2	-	-	1.2446	1.2077	0.0004095	0.002279	5.3053	5.1941	5.3815	5.3991	5.377	5.0922	4.7504	5.0097	4.915	4.8786
neg_8314	Acetyl-Ser-Asp-Lys-Pro	metab_15813	yes	-	neg	-	486.22	2.91883	M-H	C20H33N5O9	0	65.2	HMDB0247929	-	-	-	-	-	Organic acids and derivatives	Carboxylic acids and derivatives	Amino acids, peptides, and analogues	0	65.2	-	-	1.552	1.5197	6.65e-09	5.716e-07	6.6004	6.5689	6.6297	6.6049	6.6135	6.0946	6.0076	6.0737	6.0101	5.9931
neg_8346	Gly-Pro-Arg-Pro-Lys	metab_15848	yes	-	neg	-	590.279	2.8869	M+K-2H	C24H43N9O6	0	37.5	HMDB0252830	-	-	-	-	-	Organic acids and derivatives	Carboxylic acids and derivatives	Amino acids, peptides, and analogues	0	37.5	-	-	1.6344	1.5975	1.136e-06	3.314e-05	5.2636	5.2468	5.2326	5.2652	5.2713	4.4383	4.5967	4.7102	4.6594	4.6815
neg_8360	Serylphenylalanine	metab_15864	yes	-	neg	16875-28-8	251.104	2.8789	M-H	C12H16N2O4	0	43.1	HMDB0029046	-	-	-	-	-	Organic acids and derivatives	Carboxylic acids and derivatives	Amino acids, peptides, and analogues	0	43.1	-	-	1.0111	1.0028	0.001323	0.005456	4.318	4.4805	4.2112	4.3755	4.1677	4.6019	4.5598	4.5874	4.6385	4.5648
neg_8429	(2S)-2-Amino-6-[(3-formylpiperidin-1-yl)amino]hexanoic acid	metab_15940	yes	-	neg	-	256.167	2.79842	M-H	C12H23N3O3	0	63.7	HMDB0255325	-	-	-	-	-	Organic acids and derivatives	Carboxylic acids and derivatives	Amino acids, peptides, and analogues	0	63.7	-	-	1.253	1.226	2.121e-06	5.328e-05	4.476	4.5037	4.5691	4.4808	4.5028	4.0742	4.057	4.164	4.191	4.1596
neg_8475	Leukotriene C4	metab_15990	yes	C02166	neg	74841-69-3;72025-60-6	624.299	2.7259	M-H	C30H47N3O9S	0	53.5	HMDB0005095;HMDB0001198;LMFA03020003;PW_C000933	Lipids	Eicosanoids	map01100;map05310;map04664;map00590;map04976;map04080;map04726	Metabolism;Human Diseases;Organismal Systems;Metabolism;Organismal Systems;Environmental Information Processing;Organismal Systems	Global and overview maps;Immune disease;Immune system;Lipid metabolism;Digestive system;Signaling molecules and interaction;Nervous system	Organic acids and derivatives	Carboxylic acids and derivatives	Amino acids, peptides, and analogues	0	53.5	Metabolic pathways;Asthma;Fc epsilon RI signaling pathway;Arachidonic acid metabolism;Bile secretion;Neuroactive ligand-receptor interaction;Serotonergic synapse	Metabolic pathways;Asthma;Fc epsilon RI signaling pathway;Arachidonic acid metabolism;Bile secretion;Neuroactive ligand-receptor interaction;Serotonergic synapse	1.265	1.2418	2.839e-05	0.000331	5.0764	5.0472	5.1554	5.1147	5.0705	4.8128	4.5545	4.6999	4.742	4.6831
neg_8496	3-Formyl Rifamycin	metab_16013	yes	-	neg	-	770.296	2.69402	M+FA-H	C38H47NO13	0	37.3	HMDB0245874	-	-	-	-	-	Organic acids and derivatives	Carboxylic acids and derivatives	Amino acids, peptides, and analogues	0	37.3	-	-	1.175	1.1582	1.154e-07	5.535e-06	5.6698	5.6593	5.6556	5.6604	5.5941	5.3129	5.2831	5.3553	5.3433	5.3148
neg_8518	Histidylprolineamide	metab_16038	yes	-	neg	-	501.268	2.6694	2M-H	C11H17N5O2	0	35.3	HMDB0253186	-	-	-	-	-	Organic acids and derivatives	Carboxylic acids and derivatives	Amino acids, peptides, and analogues	0	35.3	-	-	2.472	2.4483	1.516e-07	6.858e-06	4.8001	4.8359	4.8156	4.8442	4.8146	3.5976	3.1815	3.1733	3.3638	3.515
neg_8548	Fe(II)-nicotianamine	metab_16070	yes	-	neg	-	302.136	2.6375	M-H	C12H21N3O6	0	37.3	HMDB0304350	-	-	-	-	-	Organic acids and derivatives	Carboxylic acids and derivatives	Amino acids, peptides, and analogues	0	37.3	-	-	1.7483	1.7179	0.001004	0.004426	5.1156	4.4028	5.2872	5.0888	5.2679	4.2411	4.1719	4.2284	4.2191	4.2018
neg_8613	[(2S,3R)-2-Amino-3-hydroxybutanoyl] (2S)-pyrrolidine-2-carboxylate	metab_16141	yes	-	neg	-	431.214	2.55692	2M-H	C9H16N2O4	0	50.8	HMDB0257877	-	-	-	-	-	Organic acids and derivatives	Carboxylic acids and derivatives	Amino acids, peptides, and analogues	0	50.8	-	-	1.6337	1.6744	0.02096	0.04528	4.4467	4.2708	5.6169	4.5602	5.6818	4.2048	4.1241	3.9991	4.0061	3.7677
neg_8652	Valylhydroxyproline	metab_16182	yes	-	neg	90965-79-0	519.266	2.50053	2M+Hac-H	C10H18N2O4	0	52.6	HMDB0029128	-	-	-	-	-	Organic acids and derivatives	Carboxylic acids and derivatives	Amino acids, peptides, and analogues	0	52.6	-	-	1.5822	1.5349	3.422e-06	7.431e-05	3.9747	3.8655	3.9943	4.0268	4.0288	3.2956	3.329	3.5423	3.389	3.3265
neg_8699	Threonylhydroxyproline	metab_16233	yes	-	neg	844641-04-9	213.088	2.45255	M-H2O-H	C9H16N2O5	0	40.3	HMDB0029062	-	-	-	-	-	Organic acids and derivatives	Carboxylic acids and derivatives	Amino acids, peptides, and analogues	0	40.3	-	-	1.0257	1.0039	0.0001584	0.001144	5.1324	5.0643	5.0573	5.1715	5.0443	4.8667	4.7639	4.922	4.8368	4.7591
neg_874	Suberylglycine	metab_16279	yes	-	neg	60317-54-6	230.103	4.16505	M-H2O-H, M-H	C10H17NO5	0	33.8	HMDB0000953	-	-	-	-	-	Organic acids and derivatives	Carboxylic acids and derivatives	Amino acids, peptides, and analogues	0	33.8	-	-	1.4179	1.3934	0.02989	0.06028	6.0342	5.9045	6.0698	6.0502	6.1231	4.6948	5.751	5.806	4.7472	5.7556
neg_9266	3-Aminoisobutanoic Acid	metab_16846	yes	C05145	neg	144-90-1	102.055	1.68317	M-H	C4H9NO2	31.5	0	PW_C001993;HMDB0003911;MJDBOTE0000609	Peptides	Amino acids	-	-	-	Organic acids and derivatives	Carboxylic acids and derivatives	Amino acids, peptides, and analogues	31.5	0	-	-	1.2504	1.2151	0.001304	0.005404	4.8648	4.8698	4.9015	4.8845	4.9142	5.4353	5.1726	5.2024	5.5926	5.149
neg_9422	N-Formyl-L-glutamic acid	metab_17008	yes	C01045	neg	1681-96-5	211.996	1.17605	M+K-2H	C6H9NO5	0	36.4	PW_C001903;HMDB0003470	-	-	map01100;map00340	Metabolism;Metabolism	Global and overview maps;Amino acid metabolism	Organic acids and derivatives	Carboxylic acids and derivatives	Amino acids, peptides, and analogues	0	36.4	Metabolic pathways;Histidine metabolism	Metabolic pathways;Histidine metabolism	2.8568	2.7615	0.007052	0.01927	5.2273	5.1941	5.3084	5.1994	5.2541	1.7453	4.2862	4.6406	1.7309	1.7364
neg_9566	Gamma-Glutamylglutamine	metab_17147	yes	C05283	neg	1466-50-8;10148-81-9	274.104	0.84845	M-H	C10H17N3O6	52.9	0	HMDB0029147;HMDB0011738	-	-	-	-	-	Organic acids and derivatives	Carboxylic acids and derivatives	Amino acids, peptides, and analogues	52.9	0	-	-	1.816	1.7805	0.0004624	0.00249	4.2406	3.9355	4.7079	4.3368	4.6733	3.4127	3.4292	3.6907	3.5199	3.5251
neg_9799	Gamma-Glutamylproline	metab_17385	yes	-	neg	53411-63-5	243.098	0.632833	M-H	C10H16N2O5	0	43.9	HMDB0029157	-	-	-	-	-	Organic acids and derivatives	Carboxylic acids and derivatives	Amino acids, peptides, and analogues	0	43.9	-	-	1.3623	1.3351	0.0003882	0.00219	4.865	4.5682	5.0193	4.8991	4.9734	4.3097	4.4444	4.4123	4.3443	4.4016
neg_9807	O-Succinyl-L-homoserine	metab_17395	yes	C01118	neg	1492-23-5	218.067	0.632833	M-H	C8H13NO6	57.6	0	HMDB0255868	-	-	map01100;map00270;map01110;map00920;map01230	Metabolism;Metabolism;Metabolism;Metabolism;Metabolism	Global and overview maps;Amino acid metabolism;Global and overview maps;Energy metabolism;Global and overview maps	Organic acids and derivatives	Carboxylic acids and derivatives	Amino acids, peptides, and analogues	57.6	0	Metabolic pathways;Cysteine and methionine metabolism;Biosynthesis of secondary metabolites;Sulfur metabolism;Biosynthesis of amino acids	Metabolic pathways;Cysteine and methionine metabolism;Biosynthesis of secondary metabolites;Sulfur metabolism;Biosynthesis of amino acids	1.1573	1.1314	7.247e-06	0.0001298	4.4318	4.5639	4.5057	4.4571	4.4957	4.7766	4.8992	4.8221	4.7929	4.7856
neg_9844	Glu-Gln	metab_17432	yes	-	neg	26848-14-6	274.104	0.62485	M-H	C10H17N3O6	49.2	0	HMDB0028817	-	-	-	-	-	Organic acids and derivatives	Carboxylic acids and derivatives	Amino acids, peptides, and analogues	49.2	0	-	-	1.0211	1.0553	0.01222	0.02941	4.7853	4.5867	5.1111	4.7482	5.067	4.5277	4.5903	4.5632	4.4693	4.507
neg_9949	4-Hydroxy-L-Proline	metab_17544	yes	C01157	neg	51-35-4	130.05	0.560333	M-H	C5H9NO3	93.7	0	HMDB0000725;MJDBOTE0000547	Peptides	Amino acids	map01100;map00470;map00330;map02010	Metabolism;Metabolism;Metabolism;Environmental Information Processing	Global and overview maps;Metabolism of other amino acids;Amino acid metabolism;Membrane transport	Organic acids and derivatives	Carboxylic acids and derivatives	Amino acids, peptides, and analogues	93.7	0	Metabolic pathways;D-Amino acid metabolism;Arginine and proline metabolism;ABC transporters	Metabolic pathways;D-Amino acid metabolism;Arginine and proline metabolism;ABC transporters	1.4934	1.46	3.213e-07	1.271e-05	5.2191	5.2062	5.3536	5.2958	5.2556	4.782	4.74	4.6887	4.6784	4.7799
neg_9970	L-4-Hydroxyglutamate semialdehyde	metab_17566	yes	C05938	neg	-	168.027	0.560333	M+Na-2H	C5H9NO4	0	48.2	PW_C002808;HMDB0006556	-	-	map01100;map00330	Metabolism;Metabolism	Global and overview maps;Amino acid metabolism	Organic acids and derivatives	Carboxylic acids and derivatives	Amino acids, peptides, and analogues	0	48.2	Metabolic pathways;Arginine and proline metabolism	Metabolic pathways;Arginine and proline metabolism	2.4649	2.4183	2.202e-09	2.36e-07	5.3455	5.1466	5.2928	5.2768	5.3288	3.8747	3.8191	3.7728	3.9688	3.7976
pos_1092	Nepsilon-Acetyl-L-lysine	metab_101	yes	C02727	pos	692-04-6	189.123	0.630917	M+H-H2O, M+H	C8H16N2O3	61.9	0	HMDB0000206	-	-	map01100;map00310	Metabolism;Metabolism	Global and overview maps;Amino acid metabolism	Organic acids and derivatives	Carboxylic acids and derivatives	Amino acids, peptides, and analogues	61.9	0	Metabolic pathways;Lysine degradation	Metabolic pathways;Lysine degradation	2.0829	2.0458	7.857e-06	0.0002951	5.4025	5.3047	5.3417	5.3686	5.3144	4.9135	4.6716	4.9379	4.7739	4.8299
pos_1133	Creatine	metab_147	yes	C00300	pos	57-00-1	132.077	0.599817	M+H, M+K	C4H9N3O2	46.8	0	HMDB0000064;PW_C000046;MJDBOTE0000560	-	-	map01100;map00330;map00260	Metabolism;Metabolism;Metabolism	Global and overview maps;Amino acid metabolism;Amino acid metabolism	Organic acids and derivatives	Carboxylic acids and derivatives	Amino acids, peptides, and analogues	46.8	0	Metabolic pathways;Arginine and proline metabolism;Glycine, serine and threonine metabolism	Metabolic pathways;Arginine and proline metabolism;Glycine, serine and threonine metabolism	2.0269	1.9861	0.0002678	0.004298	4.3786	4.1436	4.2195	4.213	4.234	3.8576	3.5491	3.7639	3.8881	3.5379
pos_12	Oxiracetam	metab_218	yes	-	pos	-	141.066	0.623083	M+H-H2O, 2M+H, 2M+K, 2M+ACN+H, M+H-2H2O, M+CH3OH+H	C6H10N2O3	0	68.6	HMDB0255986	-	-	-	-	-	Organic acids and derivatives	Carboxylic acids and derivatives	Amino acids, peptides, and analogues	0	68.6	-	-	1.3171	1.2954	1.166e-06	6.559e-05	7.007	6.9745	7.0121	6.9729	6.9863	6.8141	6.8195	6.7759	6.7543	6.7598
pos_1446	Prolyl-Arginine	metab_487	yes	-	pos	-	272.171	0.623083	M+H	C11H21N5O3	0	76.3	HMDB0029011	-	-	-	-	-	Organic acids and derivatives	Carboxylic acids and derivatives	Amino acids, peptides, and analogues	0	76.3	-	-	1.7745	1.7461	0.001113	0.008052	5.2144	5.0361	5.2056	5.2129	5.2294	4.5109	4.8046	4.9271	4.889	4.6606
pos_1545	Valganciclovir, (S)-	metab_593	yes	-	pos	-	387.198	1.05997	M+CH3OH+H	C14H22N6O5	0	58.4	HMDB0259748	-	-	-	-	-	Organic acids and derivatives	Carboxylic acids and derivatives	Amino acids, peptides, and analogues	0	58.4	-	-	1.0508	1.0268	0.01234	0.05115	5.1688	5.0009	5.0453	5.112	5.1046	5.0097	4.8359	4.8572	5.0383	4.8545
pos_1700	Methotrexate	metab_755	yes	C01937	pos	1959-05-02	472.203	1.71157	M+NH4	C20H22N8O5	0	44.1	HMDB0014703;HMDB0248287;PW_C009057;MJDBOTE0000857	-	-	map04976	Organismal Systems	Digestive system	Organic acids and derivatives	Carboxylic acids and derivatives	Amino acids, peptides, and analogues	0	44.1	Bile secretion	Bile secretion	1.3021	1.2793	8.364e-06	0.0003077	6.5164	6.4579	6.5128	6.5032	6.4848	6.3312	6.3104	6.2371	6.3124	6.2673
pos_1712	Glycylprolylhydroxyproline	metab_768	yes	-	pos	2239-67-0	327.165	1.72718	M+ACN+H	C12H19N3O5	0	69.3	HMDB0002171	-	-	-	-	-	Organic acids and derivatives	Carboxylic acids and derivatives	Amino acids, peptides, and analogues	0	69.3	-	-	1.528	1.5007	0.0001094	0.00218	5.7527	5.7241	5.8417	5.7836	5.6318	5.5128	5.4618	5.4552	5.4786	5.3785
pos_1733	Gamma-L-Glutamyl-L-methionine sulfoxide	metab_791	yes	-	pos	39015-69-5	277.085	1.75058	M+H-H2O	C10H18N2O6S	0	36.1	HMDB0038613	-	-	-	-	-	Organic acids and derivatives	Carboxylic acids and derivatives	Amino acids, peptides, and analogues	0	36.1	-	-	2.5725	2.5568	0.004555	0.02404	5.0641	4.056	5.3907	5.0596	5.3347	4.0309	4.0382	4.0424	4.0469	4.0486
pos_1737	Trp-Lys-Tyr-Met-Val-D-Met	metab_795	yes	-	pos	-	429.209	1.75058	M+2H	C41H60N8O8S2	0	56.6	HMDB0247832	-	-	-	-	-	Organic acids and derivatives	Carboxylic acids and derivatives	Amino acids, peptides, and analogues	0	56.6	-	-	1.3338	1.3113	7.696e-07	4.929e-05	5.9201	5.896	5.9181	5.8707	5.8718	5.6531	5.6699	5.6837	5.7117	5.7063
pos_1780	Serylvalylglycylglutamic acid	metab_841	yes	-	pos	-	432.208	1.78947	M+ACN+H	C15H26N4O8	0	40	HMDB0302163	-	-	-	-	-	Organic acids and derivatives	Carboxylic acids and derivatives	Amino acids, peptides, and analogues	0	40	-	-	2.4829	2.4449	0.001294	0.009037	6.1717	5.7386	6.6255	6.4821	6.628	5.5238	5.4689	5.4674	5.5505	5.5191
pos_1820	Gamma-Glutamyl-beta-aminopropiononitrile	metab_886	yes	C06114	pos	-	440.225	1.8675	2M+ACN+H	C8H13N3O3	0	35.9	HMDB0060477	-	-	map00460	Metabolism	Metabolism of other amino acids	Organic acids and derivatives	Carboxylic acids and derivatives	Amino acids, peptides, and analogues	0	35.9	Cyanoamino acid metabolism	Cyanoamino acid metabolism	1.6244	1.5998	0.007216	0.03361	6.3215	6.0443	6.2641	6.2446	6.2034	5.7976	5.5742	6.0765	5.6606	6.0226
pos_1898	DL-Buthionine sulfoximine	metab_969	yes	C04543	pos	-	245.095	1.922	M+Na	C8H18N2O3S	0	32.7	HMDB0251513;HMDB0249462	-	-	-	-	-	Organic acids and derivatives	Carboxylic acids and derivatives	Amino acids, peptides, and analogues	0	32.7	-	-	1.7988	1.7679	2.242e-08	3.533e-06	5.5319	5.5315	5.5795	5.59	5.5678	5.1828	5.1564	5.2092	5.2107	5.1507
pos_1968	N(epsilon)-(carboxyethyl)lysine	metab_1040	yes	-	pos	-	219.134	2.0537	M+H	C9H18N2O4	0	62.5	HMDB0255289	-	-	-	-	-	Organic acids and derivatives	Carboxylic acids and derivatives	Amino acids, peptides, and analogues	0	62.5	-	-	1.1087	1.0866	0.0006446	0.005143	5.6391	5.7578	5.6148	5.7095	5.6262	5.8097	5.8179	5.8671	5.8391	5.8127
pos_2040	Leucyl-Asparagine	metab_1118	yes	-	pos	-	228.134	2.17822	M+H-H2O	C10H19N3O4	0	57.1	HMDB0028924	-	-	-	-	-	Organic acids and derivatives	Carboxylic acids and derivatives	Amino acids, peptides, and analogues	0	57.1	-	-	2.7312	2.6891	5.166e-07	3.705e-05	5.2645	5.263	5.2644	5.2889	5.2441	4.1775	4.4259	4.4361	4.5384	4.3305
pos_2067	N-Docosahexaenoyl Alanine	metab_1146	yes	-	pos	-	444.245	2.21723	M+2Na-H	C25H37NO3	0	31.6	HMDB0242007	-	-	-	-	-	Organic acids and derivatives	Carboxylic acids and derivatives	Amino acids, peptides, and analogues	0	31.6	-	-	1.1859	1.1629	0.000594	0.004836	5.141	5.0267	5.1428	5.1529	5.1828	4.9113	4.9634	4.8952	5.0093	4.9519
pos_2069	Prolyl-phenylalanyl-arginine-4-nitroanilide	metab_1148	yes	-	pos	-	602.277	2.21723	M+ACN+Na	C26H34N8O5	0	37.4	HMDB0259666	-	-	-	-	-	Organic acids and derivatives	Carboxylic acids and derivatives	Amino acids, peptides, and analogues	0	37.4	-	-	1.0825	1.0541	0.02086	0.07637	5.3282	5.2805	5.4772	5.4273	5.3671	5.2338	5.2651	5.1288	5.3118	5.0029
pos_2077	Aspartyl-Lysine	metab_1157	yes	-	pos	5891-51-0	586.282	2.23277	2M+ACN+Na	C10H19N3O5	0	53.8	HMDB0028758;HMDB0004987	-	-	-	-	-	Organic acids and derivatives	Carboxylic acids and derivatives	Amino acids, peptides, and analogues	0	53.8	-	-	1.6759	1.6554	1.181e-05	0.000398	5.9897	6.0413	5.9933	6.0114	5.9598	5.5349	5.6808	5.6609	5.7333	5.6803
pos_2163	Gamma glutamyl ornithine	metab_1251	yes	-	pos	56523-61-6	545.256	2.37332	2M+Na	C10H19N3O5	0	46.5	HMDB0002248	-	-	-	-	-	Organic acids and derivatives	Carboxylic acids and derivatives	Amino acids, peptides, and analogues	0	46.5	-	-	1.0292	1.0064	0.0003253	0.004298	6.1535	6.1111	6.1778	6.1905	6.2011	6.0761	6.0004	6.0538	6.0368	5.9926
pos_2277	N-Isobutyryl-L-cysteine	metab_1372	yes	-	pos	-	174.058	2.57593	M+H-H2O	C7H13NO3S	0	40.2	HMDB0255162	-	-	-	-	-	Organic acids and derivatives	Carboxylic acids and derivatives	Amino acids, peptides, and analogues	0	40.2	-	-	3.2535	3.1902	1.706e-05	0.0005368	4.42	4.6379	5.2293	4.5238	4.6693	3.4395	3.4406	3.394	3.3985	3.4002
pos_2288	Met-leu-phe	metab_1383	yes	-	pos	-	374.192	2.59925	M+H-2H2O	C20H31N3O4S	0	47.4	HMDB0254492	-	-	-	-	-	Organic acids and derivatives	Carboxylic acids and derivatives	Amino acids, peptides, and analogues	0	47.4	-	-	2.4378	2.3892	0.001307	0.009087	5.763	5.1187	5.9554	5.6364	5.8735	4.8295	4.7533	4.7806	5.1441	4.8914
pos_23	Glutamylproline	metab_1396	yes	-	pos	41745-47-5	286.139	0.623083	M+H, M+NH4, M+ACN+H, M+ACN+Na, M+H-2H2O	C10H16N2O5	0	44.9	HMDB0028827	-	-	-	-	-	Organic acids and derivatives	Carboxylic acids and derivatives	Amino acids, peptides, and analogues	0	44.9	-	-	1.6775	1.6413	0.0013	0.009053	5.8389	5.6058	5.9955	5.8179	5.9452	5.5048	5.3325	5.4431	5.5532	5.5029
pos_2342	Alanylvaline	metab_1444	yes	-	pos	3303-45-5	440.25	2.70095	2M+ACN+Na	C8H16N2O3	0	38.2	HMDB0028700	-	-	-	-	-	Organic acids and derivatives	Carboxylic acids and derivatives	Amino acids, peptides, and analogues	0	38.2	-	-	2.3092	2.2686	1.071e-06	6.146e-05	5.7329	5.6147	5.7109	5.6677	5.5631	5.0287	4.9608	5.0371	5.158	4.9573
pos_255	Gamma-Glutamylacetamide	metab_1668	yes	-	pos	-	189.087	0.592	M+H, M+K, M+Na	C7H12N2O4	0	33.8	HMDB0252618	-	-	-	-	-	Organic acids and derivatives	Carboxylic acids and derivatives	Amino acids, peptides, and analogues	0	33.8	-	-	1.1573	1.143	3.141e-05	0.0008503	5.0521	5.0527	5.0495	5.13	5.0604	4.9037	4.9165	4.8606	4.9341	4.909
pos_2551	3-Hydroxylidocaine	metab_1670	yes	C16560	pos	34604-55-2	251.175	3.1378	M+H	C14H22N2O2	0	41.7	HMDB0060655;PW_C040576	-	-	map00982	Metabolism	Xenobiotics biodegradation and metabolism	Organic acids and derivatives	Carboxylic acids and derivatives	Amino acids, peptides, and analogues	0	41.7	Drug metabolism - cytochrome P450	Drug metabolism - cytochrome P450	1.2016	1.1746	0.01859	0.07026	4.8675	4.8837	4.9632	4.9069	4.8708	4.5978	4.4092	4.7574	4.7258	4.8498
pos_2565	N-Formyl-met-leu-phe-lys	metab_1685	yes	-	pos	-	530.281	3.1847	M+H-2H2O	C27H43N5O6S	0	70.2	HMDB0252432	-	-	-	-	-	Organic acids and derivatives	Carboxylic acids and derivatives	Amino acids, peptides, and analogues	0	70.2	-	-	1.1042	1.0868	0.02417	0.08494	6.134	6.0157	6.287	6.2372	6.2402	6.1348	5.8702	6.0385	5.8563	6.0169
pos_2916	5-Hydroxylysinonorleucine	metab_2044	yes	-	pos	-	621.323	4.5503	2M+K	C12H25N3O5	0	52.3	HMDB0246805	-	-	-	-	-	Organic acids and derivatives	Carboxylic acids and derivatives	Amino acids, peptides, and analogues	0	52.3	-	-	3.9382	3.8768	7.851e-09	1.497e-06	5.5596	5.498	5.628	5.5117	5.5863	4.0256	3.6729	3.6772	3.6817	3.6834
pos_3316	5-Aminolevulinic Acid	metab_2479	yes	C00430	pos	106-60-5	114.055	5.61357	M+H-H2O	C5H9NO3	49.5	0	HMDB0001149;PW_C000894;MJDBOTE0001053	-	-	map01100;map01110;map01120;map01240;map02010;map00860;map00260;map01060	Metabolism;Metabolism;Metabolism;Metabolism;Environmental Information Processing;Metabolism;Metabolism;Metabolism	Global and overview maps;Global and overview maps;Global and overview maps;Global and overview maps;Membrane transport;Metabolism of cofactors and vitamins;Amino acid metabolism;Chemical structure transformation maps	Organic acids and derivatives	Carboxylic acids and derivatives	Amino acids, peptides, and analogues	49.5	0	Metabolic pathways;Biosynthesis of secondary metabolites;Microbial metabolism in diverse environments;Biosynthesis of cofactors;ABC transporters;Porphyrin metabolism;Glycine, serine and threonine metabolism;Biosynthesis of plant secondary metabolites	Metabolic pathways;Biosynthesis of secondary metabolites;Microbial metabolism in diverse environments;Biosynthesis of cofactors;ABC transporters;Porphyrin metabolism;Glycine, serine and threonine metabolism;Biosynthesis of plant secondary metabolites	1.2908	1.2777	0.004183	0.02261	4.4549	4.6129	4.6738	4.6281	4.7378	4.2967	4.3778	4.4782	4.2947	4.4567
pos_37	Glycylproline	metab_2900	yes	-	pos	704-15-4	173.092	0.630917	M+H, M+Na, M+CH3OH+H, M+K	C7H12N2O3	97	0	HMDB0000721	-	-	-	-	-	Organic acids and derivatives	Carboxylic acids and derivatives	Amino acids, peptides, and analogues	97	0	-	-	1.1225	1.1092	0.0008096	0.006218	5.986	5.9537	5.996	5.9856	5.977	5.7107	5.8795	5.8432	5.7669	5.8566
pos_398	N2-gamma-Glutamylglutamine	metab_3207	yes	C05283	pos	10148-81-9	276.119	0.623083	M+H, M+K	C10H17N3O6	0	58.2	HMDB0011738	-	-	-	-	-	Organic acids and derivatives	Carboxylic acids and derivatives	Amino acids, peptides, and analogues	0	58.2	-	-	1.844	1.8349	0.0227	0.08101	4.4921	3.5408	4.5354	3.7946	4.1419	3.5157	3.6485	3.5272	3.5317	3.5333
pos_4591	N-Stearoyl Glutamine	metab_3875	yes	-	pos	-	395.326	5.77788	M+H-H2O	C23H44N2O4	0	62.6	HMDB0241941;LMFA08020130	-	-	-	-	-	Organic acids and derivatives	Carboxylic acids and derivatives	Amino acids, peptides, and analogues	0	62.6	-	-	1.5307	1.503	1.603e-05	0.0005156	5.3293	5.3463	5.4443	5.2961	5.3139	5.0909	5.0576	5.0579	5.0044	5.1002
pos_4818	Opiorphin	metab_4125	yes	-	pos	-	734.408	5.55063	M+ACN+H	C29H48N12O8	0	66.8	HMDB0059792	-	-	-	-	-	Organic acids and derivatives	Carboxylic acids and derivatives	Amino acids, peptides, and analogues	0	66.8	-	-	2.1369	2.1016	0.03154	0.1039	4.2585	3.4824	3.9112	4.3339	4.3325	3.2671	3.8266	2.3477	3.3385	3.6096
pos_5575	Threonylproline	metab_4922	yes	-	pos	46398-79-2	474.255	3.75928	2M+ACN+H	C9H16N2O4	0	58	HMDB0029069	-	-	-	-	-	Organic acids and derivatives	Carboxylic acids and derivatives	Amino acids, peptides, and analogues	0	58	-	-	1.7036	1.6994	0.03616	0.1149	5.2731	4.3433	5.0939	4.3548	5.073	4.3182	4.3254	4.3297	4.3342	4.3359
pos_561	L-Prolyl-4-hydroxy-L-prolin	metab_4957	yes	-	pos	-	261.144	2.59143	M+H-H2O, M+CH3OH+H	C10H16N2O4	0	30.5	HMDB0256781	-	-	-	-	-	Organic acids and derivatives	Carboxylic acids and derivatives	Amino acids, peptides, and analogues	0	30.5	-	-	1.5868	1.6235	0.04112	0.1263	6.5011	6.3906	6.6692	6.4717	6.7612	5.6334	6.3989	6.3921	5.7017	6.3685
pos_5695	2-Aminomuconic acid semialdehyde	metab_5040	yes	C03824	pos	245128-91-0	124.039	3.40243	M+H-H2O	C6H7NO3	0	44.1	PW_C000991;LMFA01060191;HMDB0001280	-	-	map01100;map00627;map00380;map01120	Metabolism;Metabolism;Metabolism;Metabolism	Global and overview maps;Xenobiotics biodegradation and metabolism;Amino acid metabolism;Global and overview maps	Organic acids and derivatives	Carboxylic acids and derivatives	Amino acids, peptides, and analogues	0	44.1	Metabolic pathways;Aminobenzoate degradation;Tryptophan metabolism;Microbial metabolism in diverse environments	Metabolic pathways;Aminobenzoate degradation;Tryptophan metabolism;Microbial metabolism in diverse environments	1.3151	1.2946	0.02372	0.08373	4.2785	4.1606	4.1741	3.8632	4.003	3.5817	3.9182	4.0082	3.7657	3.7671
pos_5739	(2S,4S)-Pinnatanine	metab_5083	yes	-	pos	35214-74-5	245.113	3.2625	M+H	C10H16N2O5	0	32.9	HMDB0029439;LMFA01050445	-	-	-	-	-	Organic acids and derivatives	Carboxylic acids and derivatives	Amino acids, peptides, and analogues	0	32.9	-	-	2.3607	2.3187	1.91e-06	0.0001015	4.3584	4.4086	4.581	4.5338	4.5605	3.8913	3.7692	3.7735	3.778	3.9133
pos_5907	Merodesmosine	metab_5261	yes	-	pos	17096-97-8	385.244	2.92718	M+H-H2O	C18H34N4O6	0	63.7	HMDB0030407	-	-	-	-	-	Organic acids and derivatives	Carboxylic acids and derivatives	Amino acids, peptides, and analogues	0	63.7	-	-	3.191	3.1393	4.415e-07	3.265e-05	5.3062	5.1938	5.3288	5.3031	5.321	4.3515	4.1144	4.0871	4.026	3.8723
pos_596	(3s)-3-(Benzyloxy)-L-Aspartic Acid	metab_5315	yes	-	pos	-	281.113	2.73993	M+NH4, M+ACN+H	C11H13NO5	0	45	HMDB0250058	-	-	-	-	-	Organic acids and derivatives	Carboxylic acids and derivatives	Amino acids, peptides, and analogues	0	45	-	-	1.1313	1.1184	0.02015	0.07454	5.0748	4.7924	5.0546	5.0483	5.0139	4.7048	4.6774	4.865	4.9313	4.7849
pos_5963	N-Acetyltyrosine	metab_5319	yes	C01657	pos	537-55-3	188.07	2.83355	M+H-2H2O	C11H13NO4	0	46.8	HMDB0244966;HMDB0000866	-	-	-	-	-	Organic acids and derivatives	Carboxylic acids and derivatives	Amino acids, peptides, and analogues	0	46.8	-	-	1.335	1.3445	0.03111	0.1031	4.0305	4.0459	3.9764	3.7129	4.2239	4.1239	4.181	4.556	4.2195	4.4175
pos_6100	5-Hydroxyindoleacetylglycine	metab_5471	yes	C05832	pos	-	281.113	2.6227	M+CH3OH+H	C12H12N2O4	0	50	HMDB0004185	-	-	map00380	Metabolism	Amino acid metabolism	Organic acids and derivatives	Carboxylic acids and derivatives	Amino acids, peptides, and analogues	0	50	Tryptophan metabolism	Tryptophan metabolism	1.4864	1.4955	0.009645	0.04188	5.0504	4.6886	5.0923	5.0354	5.0708	4.4051	4.6715	4.7141	4.7091	4.7678
pos_6146	Phenylalanylthreonine	metab_5520	yes	-	pos	51352-44-4	267.134	2.5603	M+H	C13H18N2O4	0	42.3	HMDB0029005	-	-	-	-	-	Organic acids and derivatives	Carboxylic acids and derivatives	Amino acids, peptides, and analogues	0	42.3	-	-	2.0304	1.998	0.0005108	0.004298	4.9543	4.9933	5.1047	5.0733	5.0363	4.1419	4.5934	4.4885	4.6653	4.5796
pos_615	2-[(2S)-2,6-Diaminohexanoyl]oxyacetic acid	metab_5524	yes	-	pos	-	246.145	2.03807	M+H, M+ACN+H	C8H16N2O4	0	65.3	HMDB0257672	-	-	-	-	-	Organic acids and derivatives	Carboxylic acids and derivatives	Amino acids, peptides, and analogues	0	65.3	-	-	1.4624	1.4333	1.944e-06	0.0001025	5.7568	5.6791	5.7469	5.7728	5.7467	5.4862	5.4426	5.5131	5.5152	5.476
pos_6210	Tyr-Leu-Tyr-Glu-Ile-Ala-Arg	metab_5590	yes	-	pos	-	475.24	2.45918	M+H+Na	C44H66N10O12	0	39.4	HMDB0247897	-	-	-	-	-	Organic acids and derivatives	Carboxylic acids and derivatives	Amino acids, peptides, and analogues	0	39.4	-	-	1.8684	1.8358	0.02207	0.07966	4.9287	4.2303	4.3906	4.9491	4.8076	4.1851	3.801	3.9207	3.9542	4.5826
pos_6214	Hypoglycin B	metab_5594	yes	C08280	pos	502-37-4	253.118	2.45918	M+H-H2O	C12H18N2O5	0	57.8	HMDB0029428	-	-	-	-	-	Organic acids and derivatives	Carboxylic acids and derivatives	Amino acids, peptides, and analogues	0	57.8	-	-	2.2239	2.1888	2.536e-08	3.871e-06	6.064	6.0327	6.0583	6.0794	6.0497	5.4585	5.4326	5.436	5.5737	5.4933
pos_6279	Leu-Leu-Tyr	metab_5664	yes	C11331	pos	20368-24-5	430.229	2.38105	M+Na	C21H33N3O5	0	39.9	HMDB0304804	-	-	-	-	-	Organic acids and derivatives	Carboxylic acids and derivatives	Amino acids, peptides, and analogues	0	39.9	-	-	1.0104	0.992	0.003702	0.02054	5.5099	5.4655	5.592	5.4876	5.5772	5.4045	5.4362	5.4183	5.3592	5.2946
pos_6282	3-Hydroxy-L-proline	metab_5668	yes	C04397	pos	4298-08-02	304.15	2.38105	2M+ACN+H	C5H9NO3	0	48	HMDB0002113	-	-	-	-	-	Organic acids and derivatives	Carboxylic acids and derivatives	Amino acids, peptides, and analogues	0	48	-	-	1.0063	0.9927	0.008753	0.0389	5.5893	5.473	5.6962	5.5583	5.6791	5.4688	5.4026	5.4418	5.4884	5.4471
pos_6343	Phenylalanine glutamate	metab_5736	yes	-	pos	-	352.15	2.30293	M+ACN+H	C14H18N2O6	0	61.4	HMDB0256433	-	-	-	-	-	Organic acids and derivatives	Carboxylic acids and derivatives	Amino acids, peptides, and analogues	0	61.4	-	-	3.0673	3.0188	0.003831	0.02112	5.1854	3.8199	5.4347	5.3933	5.4495	4.1159	3.597	3.6012	3.6057	3.7603
pos_6378	Aspartame	metab_5772	yes	C11045	pos	22839-47-0	295.129	2.26397	M+H	C14H18N2O5	58.4	0	HMDB0001894;MJDBOTE0001640	-	-	map04742	Organismal Systems	Sensory system	Organic acids and derivatives	Carboxylic acids and derivatives	Amino acids, peptides, and analogues	58.4	0	Taste transduction	Taste transduction	1.6344	1.6214	0.004718	0.0246	5.5342	5.1711	5.7163	5.5644	5.6803	5.1302	5.1469	5.1519	5.2126	5.1266
pos_6437	(2S)-1-[2-[[(2S)-Pyrrolidine-2-carbonyl]amino]acetyl]pyrrolidine-2-carboxylic Acid	metab_5838	yes	-	pos	-	539.282	2.18603	2M+H	C12H19N3O4	0	78	HMDB0260136	-	-	-	-	-	Organic acids and derivatives	Carboxylic acids and derivatives	Amino acids, peptides, and analogues	0	78	-	-	1.1862	1.1696	0.0004478	0.004298	6.0012	6.0037	6.0247	5.9771	5.9698	5.7707	5.8199	5.7367	5.9144	5.8284
pos_6447	Beta-Hydroxy-gamma-trimethylaminobutyric acid	metab_5848	yes	-	pos	-	361.171	2.17822	2M+K	C7H15NO3	0	40.4	HMDB0244982	-	-	-	-	-	Organic acids and derivatives	Carboxylic acids and derivatives	Amino acids, peptides, and analogues	0	40.4	-	-	2.6527	2.5979	0.0001258	0.002388	6.1227	5.6658	6.3457	6.1615	6.315	5.2985	5.1236	5.2828	5.3208	5.2048
pos_6462	Glycylleucine	metab_5865	yes	C02155	pos	869-19-2	189.123	2.15492	M+H	C8H16N2O3	0	43.1	HMDB0000759;HMDB0028929	-	-	-	-	-	Organic acids and derivatives	Carboxylic acids and derivatives	Amino acids, peptides, and analogues	0	43.1	-	-	1.079	1.0662	0.0007404	0.00576	6.2001	6.2148	6.2546	6.2092	6.2486	5.9764	6.1073	6.1164	6.0419	6.1109
pos_6467	Trans-4-Hydroxy-L-proline	metab_5869	yes	C01157	pos	51-35-4	132.065	2.14708	M+H	C5H9NO3	44	0	HMDB0000725	Peptides	Amino acids	map01100;map00470;map00330;map02010	Metabolism;Metabolism;Metabolism;Environmental Information Processing	Global and overview maps;Metabolism of other amino acids;Amino acid metabolism;Membrane transport	Organic acids and derivatives	Carboxylic acids and derivatives	Amino acids, peptides, and analogues	44	0	Metabolic pathways;D-Amino acid metabolism;Arginine and proline metabolism;ABC transporters	Metabolic pathways;D-Amino acid metabolism;Arginine and proline metabolism;ABC transporters	1.7901	1.7546	6.629e-06	0.000257	6.139	6.0716	6.2712	6.1933	6.2175	5.7452	5.7824	5.8096	5.8333	5.8002
pos_6488	Tyrosyl-Proline	metab_5889	yes	-	pos	-	279.134	2.12377	M+H	C14H18N2O4	0	54.7	HMDB0029113	-	-	-	-	-	Organic acids and derivatives	Carboxylic acids and derivatives	Amino acids, peptides, and analogues	0	54.7	-	-	2.3647	2.3192	4.967e-06	0.0002013	7.2683	7.0595	7.4086	7.3295	7.3475	6.5537	6.612	6.6483	6.6114	6.6397
pos_6502	Panax ginseng Tetrapeptide	metab_5906	yes	-	pos	-	230.629	2.10823	M+2H	C18H33N7O7	0	30.4	HMDB0302146	-	-	-	-	-	Organic acids and derivatives	Carboxylic acids and derivatives	Amino acids, peptides, and analogues	0	30.4	-	-	3.0823	3.0318	2.703e-06	0.0001319	5.0379	4.7824	4.9923	4.9886	4.9953	3.9929	3.9821	3.518	3.8476	3.794
pos_6515	Alanylproline	metab_5919	yes	-	pos	13485-59-1	373.208	2.08483	2M+H	C8H14N2O3	0	45.1	HMDB0028695	-	-	-	-	-	Organic acids and derivatives	Carboxylic acids and derivatives	Amino acids, peptides, and analogues	0	45.1	-	-	1.5359	1.5046	3.35e-05	0.0008932	5.8588	5.7288	5.923	5.8816	5.8619	5.5307	5.5523	5.5869	5.594	5.5519
pos_6533	L-Coprine	metab_5938	yes	C08271	pos	58919-61-2	446.224	2.06152	2M+ACN+H	C8H14N2O4	0	74.3	HMDB0034266	-	-	-	-	-	Organic acids and derivatives	Carboxylic acids and derivatives	Amino acids, peptides, and analogues	0	74.3	-	-	2.1385	2.1043	0.0009073	0.006814	6.0626	5.6234	6.1954	6.0316	6.2514	5.359	5.3523	5.4798	5.567	5.399
pos_6548	Prolyl-Gamma-glutamate	metab_5954	yes	-	pos	-	487.251	2.04588	2M+H	C10H17N3O4	0	73.3	HMDB0029031	-	-	-	-	-	Organic acids and derivatives	Carboxylic acids and derivatives	Amino acids, peptides, and analogues	0	73.3	-	-	1.9155	1.8733	0.000836	0.006352	5.3528	5.0452	5.2281	5.2139	5.13	4.6517	4.5086	4.9743	4.7665	4.6623
pos_6599	Carboxy methyl lysine	metab_6003	yes	-	pos	-	431.213	1.9914	2M+Na	C8H16N2O4	0	54.8	HMDB0249649	-	-	-	-	-	Organic acids and derivatives	Carboxylic acids and derivatives	Amino acids, peptides, and analogues	0	54.8	-	-	1.6786	1.6489	3.159e-07	2.666e-05	6.8284	6.8183	6.8912	6.8526	6.8911	6.4962	6.5269	6.5814	6.5071	6.506
pos_6632	Atosiban	metab_6038	yes	-	pos	-	497.732	1.93727	M+2H	C43H67N11O12S2	0	87.4	HMDB0248705	-	-	-	-	-	Organic acids and derivatives	Carboxylic acids and derivatives	Amino acids, peptides, and analogues	0	87.4	-	-	1.9447	1.9118	2.258e-05	0.0006552	6.1999	6.1513	6.1744	6.1539	6.1378	5.7172	5.6928	5.8849	5.6376	5.5788
pos_6693	Pyroglutamyl-glutamyl-proline amide	metab_6098	yes	-	pos	-	372.187	1.91418	M+NH4	C15H22N4O6	0	59.3	HMDB0247524	-	-	-	-	-	Organic acids and derivatives	Carboxylic acids and derivatives	Amino acids, peptides, and analogues	0	59.3	-	-	2.574	2.5361	5.572e-09	1.142e-06	5.9418	5.8688	5.8796	5.8397	5.8921	5.1378	5.1953	5.0835	5.0727	5.0617
pos_6742	(2S,2'S)-Pyrosaccharopine	metab_6151	yes	-	pos	38495-84-0	276.155	1.90642	M+NH4	C11H18N2O5	0	56.7	HMDB0038676	-	-	-	-	-	Organic acids and derivatives	Carboxylic acids and derivatives	Amino acids, peptides, and analogues	0	56.7	-	-	1.3824	1.3453	0.0263	0.09069	4.871	4.6909	4.8317	4.7726	4.9198	4.519	4.0855	4.5679	4.691	4.6506
pos_6746	Hexanoylglutamine	metab_6154	yes	-	pos	-	245.149	1.90642	M+H	C11H20N2O4	0	35.8	HMDB0242182	-	-	-	-	-	Organic acids and derivatives	Carboxylic acids and derivatives	Amino acids, peptides, and analogues	0	35.8	-	-	2.3145	2.2687	7.095e-05	0.001613	7.2533	6.9374	7.4582	7.2741	7.3699	6.5908	6.5944	6.5914	6.6206	6.5914
pos_6788	Hydroxyprolyl-Tyrosine	metab_6199	yes	-	pos	-	630.271	1.8675	2M+ACN+H	C14H18N2O5	0	43	HMDB0028875	-	-	-	-	-	Organic acids and derivatives	Carboxylic acids and derivatives	Amino acids, peptides, and analogues	0	43	-	-	2.1336	2.1002	0.0004221	0.004298	5.5489	5.4691	5.5273	5.6342	5.43	4.8728	5.0677	4.9737	5.1593	4.6049
pos_6849	Tetrahydrodipicolinate	metab_6266	yes	C03972	pos	4226-22-6	213.087	1.77385	M+ACN+H	C7H9NO4	0	60.1	HMDB0012289	-	-	map01100;map01110;map00300;map01120;map01230;map00261	Metabolism;Metabolism;Metabolism;Metabolism;Metabolism;Metabolism	Global and overview maps;Global and overview maps;Amino acid metabolism;Global and overview maps;Global and overview maps;Biosynthesis of other secondary metabolites	Organic acids and derivatives	Carboxylic acids and derivatives	Amino acids, peptides, and analogues	0	60.1	Metabolic pathways;Biosynthesis of secondary metabolites;Lysine biosynthesis;Microbial metabolism in diverse environments;Biosynthesis of amino acids;Monobactam biosynthesis	Metabolic pathways;Biosynthesis of secondary metabolites;Lysine biosynthesis;Microbial metabolism in diverse environments;Biosynthesis of amino acids;Monobactam biosynthesis	2.0496	2.0209	3.74e-08	4.878e-06	5.7951	5.7615	5.7491	5.7543	5.7229	5.292	5.2314	5.2393	5.3374	5.2284
pos_6859	N(2)-phenylacetyl-L-glutaminate	metab_6277	yes	C05597	pos	-	529.224	1.7661	2M+H	C13H16N2O4	0	47.7	HMDB0062645	-	-	-	-	-	Organic acids and derivatives	Carboxylic acids and derivatives	Amino acids, peptides, and analogues	0	47.7	-	-	1.2497	1.2351	0.0001576	0.002858	5.8265	5.694	5.7408	5.7961	5.7011	5.9986	5.9482	5.9092	5.9531	5.9416
pos_6907	N-(gamma-Glutamyl)ethanolamine	metab_6331	yes	-	pos	2650-74-0	444.208	1.75842	2M+ACN+Na	C7H14N2O4	0	36.5	HMDB0039222	-	-	-	-	-	Organic acids and derivatives	Carboxylic acids and derivatives	Amino acids, peptides, and analogues	0	36.5	-	-	1.0472	1.0311	0.001727	0.01116	5.9012	5.8443	5.752	5.8096	5.8465	6.0126	5.9428	5.9749	6.0444	5.9296
pos_6996	DL-Norvaline	metab_6426	yes	C01799	pos	760-78-1	159.113	1.72718	M+ACN+H	C5H11NO2	0	47.8	HMDB0013716;HMDB0251527	-	-	-	-	-	Organic acids and derivatives	Carboxylic acids and derivatives	Amino acids, peptides, and analogues	0	47.8	-	-	1.2734	1.292	0.01573	0.06166	5.162	4.7767	5.1722	5.0883	5.232	4.8125	4.8015	4.9083	4.7966	4.841
pos_6999	1-Aminocyclopropanecarboxylic Acid	metab_6429	yes	C01234	pos	22059-21-8	84.0448	1.72718	M+H-H2O	C4H7NO2	44.2	0	HMDB0036458;MJDBZSJ0000128	-	-	map01100;map00270;map01110;map01070;map01060	Metabolism;Metabolism;Metabolism;Metabolism;Metabolism	Global and overview maps;Amino acid metabolism;Global and overview maps;Chemical structure transformation maps;Chemical structure transformation maps	Organic acids and derivatives	Carboxylic acids and derivatives	Amino acids, peptides, and analogues	44.2	0	Metabolic pathways;Cysteine and methionine metabolism;Biosynthesis of secondary metabolites;Biosynthesis of plant hormones;Biosynthesis of plant secondary metabolites	Metabolic pathways;Cysteine and methionine metabolism;Biosynthesis of secondary metabolites;Biosynthesis of plant hormones;Biosynthesis of plant secondary metabolites	1.0088	0.9934	0.001426	0.009647	5.138	5.0815	5.1708	5.2124	5.2353	5.0238	5.0002	5.0524	5.0463	5.0299
pos_7055	Kyotorphin	metab_6490	yes	C02993	pos	70904-56-2	338.182	1.66472	M+H	C15H23N5O4	0	55.5	HMDB0029099;HMDB0005768	-	-	-	-	-	Organic acids and derivatives	Carboxylic acids and derivatives	Amino acids, peptides, and analogues	0	55.5	-	-	5.1683	5.0869	3.631e-05	0.0009428	3.8574	3.9859	3.8869	4.2602	4.6258	0.4755	0.4803	0.4832	2.3385	0.4873
pos_7061	N-(1-(1,2-Dihydro-1-methanesulfonylspiro(3H-indole-3,4'-piperidine-1'-yl)carbonyl)-4-phenylbutyl)-2-amino-2-methylpropanamide hydrochloride	metab_6496	yes	-	pos	-	491.246	1.64932	M+H-2H2O	C28H38N4O4S	0	42.6	HMDB0253840	-	-	-	-	-	Organic acids and derivatives	Carboxylic acids and derivatives	Amino acids, peptides, and analogues	0	42.6	-	-	2.136	2.1489	0.01345	0.05488	5.047	5.2198	4.5389	4.9324	4.3184	5.8089	5.0146	5.3938	5.8784	5.5576
pos_7153	L-Threonine	metab_6593	yes	C00188	pos	72-19-5	84.0448	1.23195	M+H-2H2O	C4H9NO3	68	0	PW_C000109;HMDB0000167;MJDBOTE0000464	Peptides	Amino acids	map01100;map04978;map01110;map00260;map01120;map00290;map00470;map00860;map01230;map04974;map02010;map00970;map00261;map01060	Metabolism;Organismal Systems;Metabolism;Metabolism;Metabolism;Metabolism;Metabolism;Metabolism;Metabolism;Organismal Systems;Environmental Information Processing;Genetic Information Processing;Metabolism;Metabolism	Global and overview maps;Digestive system;Global and overview maps;Amino acid metabolism;Global and overview maps;Amino acid metabolism;Metabolism of other amino acids;Metabolism of cofactors and vitamins;Global and overview maps;Digestive system;Membrane transport;Translation;Biosynthesis of other secondary metabolites;Chemical structure transformation maps	Organic acids and derivatives	Carboxylic acids and derivatives	Amino acids, peptides, and analogues	68	0	Metabolic pathways;Mineral absorption;Biosynthesis of secondary metabolites;Glycine, serine and threonine metabolism;Microbial metabolism in diverse environments;Valine, leucine and isoleucine biosynthesis;D-Amino acid metabolism;Porphyrin metabolism;Biosynthesis of amino acids;Protein digestion and absorption;ABC transporters;Aminoacyl-tRNA biosynthesis;Monobactam biosynthesis;Biosynthesis of pl…	Metabolic pathways;Mineral absorption;Biosynthesis of secondary metabolites;Glycine, serine and threonine metabolism;Microbial metabolism in diverse environments;Valine, leucine and isoleucine biosynthesis;D-Amino acid metabolism;Porphyrin metabolism;Biosynthesis of amino acids;Protein digestion and absorption;ABC transporters;Aminoacyl-tRNA biosynthesis;Monobactam biosynthesis;Biosynthesis of pl…	2.065	2.0282	8.589e-08	9.627e-06	6.2248	6.1299	6.2173	6.1798	6.231	5.6623	5.6986	5.772	5.6726	5.6722
pos_7155	Nopalinic acid	metab_6595	yes	C01683	pos	63409-16-5	245.113	1.22412	M+H-H2O	C10H18N2O6	0	50.9	HMDB0029437	-	-	-	-	-	Organic acids and derivatives	Carboxylic acids and derivatives	Amino acids, peptides, and analogues	0	50.9	-	-	2.632	2.581	1.792e-06	9.664e-05	5.2338	5.0376	5.2506	5.2077	5.2444	4.3733	4.3757	4.4808	4.457	4.1756
pos_7194	Valylproline	metab_6637	yes	-	pos	20488-27-1	256.165	1.13815	M+ACN+H	C10H18N2O3	0	44.6	HMDB0029135	-	-	-	-	-	Organic acids and derivatives	Carboxylic acids and derivatives	Amino acids, peptides, and analogues	0	44.6	-	-	2.0688	2.0434	0.003145	0.01802	5.2081	4.7628	5.2512	5.0671	5.4017	4.4111	4.446	4.8516	4.6601	4.339
pos_7215	N-Alpha-acetyllysine	metab_6660	yes	C12989	pos	1946-82-3	189.123	1.1069	M+H	C8H16N2O3	36.1	0	HMDB0000446	-	-	-	-	-	Organic acids and derivatives	Carboxylic acids and derivatives	Amino acids, peptides, and analogues	36.1	0	-	-	1.2382	1.2185	1.98e-05	0.0005941	5.1249	5.1271	5.1174	5.1365	5.1739	4.9501	4.9522	4.9761	4.9871	4.8814
pos_7253	Homoserine Lactone	metab_6698	yes	C02926	pos	1192-20-7	102.055	0.981783	M+H	C4H7NO2	40.8	0	HMDB0029387	-	-	-	-	-	Organic acids and derivatives	Carboxylic acids and derivatives	Amino acids, peptides, and analogues	40.8	0	-	-	1.1364	1.1279	0.01054	0.04507	5.5797	5.5377	5.5581	5.5705	5.5967	5.3435	5.4443	5.4571	5.1447	5.4502
pos_7311	Hydroxyprolyl-Lysine	metab_6757	yes	-	pos	-	301.187	0.880333	M+ACN+H	C11H21N3O4	0	38.8	HMDB0028868	-	-	-	-	-	Organic acids and derivatives	Carboxylic acids and derivatives	Amino acids, peptides, and analogues	0	38.8	-	-	1.3867	1.3515	0.01862	0.07026	4.2066	3.7882	4.0595	3.6224	3.8284	3.5858	3.5931	3.5973	3.6018	3.6035
pos_7426	Alanylarginine	metab_6873	yes	-	pos	16709-12-9	228.145	0.630917	M+H-H2O	C9H19N5O3	0	44.9	HMDB0028681	-	-	-	-	-	Organic acids and derivatives	Carboxylic acids and derivatives	Amino acids, peptides, and analogues	0	44.9	-	-	2.1398	2.0923	0.01585	0.06198	4.5625	4.3354	4.5785	3.4434	4.4857	3.8817	3.414	3.4183	3.6981	3.4245
pos_7433	5-Aminopentanamide	metab_6881	yes	C00990	pos	13023-70-6	99.0919	0.630917	M+H-H2O	C5H12N2O	0	41.7	HMDB0012176	-	-	map01100;map00310;map01120	Metabolism;Metabolism;Metabolism	Global and overview maps;Amino acid metabolism;Global and overview maps	Organic acids and derivatives	Carboxylic acids and derivatives	Amino acids, peptides, and analogues	0	41.7	Metabolic pathways;Lysine degradation;Microbial metabolism in diverse environments	Metabolic pathways;Lysine degradation;Microbial metabolism in diverse environments	1.7894	1.7531	2.82e-05	0.0007779	5.1874	5.0405	5.2026	5.1531	5.2646	4.8586	4.7575	4.8262	4.743	4.7122
pos_7438	Glutaminylhydroxyproline	metab_6885	yes	-	pos	-	298.08	0.623083	M+K	C10H17N3O5	0	38.3	HMDB0028798	-	-	-	-	-	Organic acids and derivatives	Carboxylic acids and derivatives	Amino acids, peptides, and analogues	0	38.3	-	-	1.7177	1.6936	0.001452	0.009751	4.9914	4.9583	5.0489	5.0507	5.1348	4.8262	4.7388	4.3614	4.6293	4.6406
pos_7456	Cis-4-Hydroxy-D-proline	metab_6903	yes	C03440	pos	2584-71-6	132.065	0.623083	M+H	C5H9NO3	60.8	0	HMDB0060460	-	-	map01100;map00470	Metabolism;Metabolism	Global and overview maps;Metabolism of other amino acids	Organic acids and derivatives	Carboxylic acids and derivatives	Amino acids, peptides, and analogues	60.8	0	Metabolic pathways;D-Amino acid metabolism	Metabolic pathways;D-Amino acid metabolism	2.3347	2.2891	7.369e-07	4.85e-05	5.5218	5.4491	5.6819	5.5343	5.5372	4.9374	4.9115	4.8595	4.9778	4.8256
pos_7457	(3S)-3,6-Diaminohexanoate	metab_6904	yes	C01142	pos	4299-56-3	129.102	0.623083	M+H-H2O	C6H14N2O2	0	54.4	HMDB0012114	-	-	map01100;map00310	Metabolism;Metabolism	Global and overview maps;Amino acid metabolism	Organic acids and derivatives	Carboxylic acids and derivatives	Amino acids, peptides, and analogues	0	54.4	Metabolic pathways;Lysine degradation	Metabolic pathways;Lysine degradation	1.2037	1.1753	0.0295	0.09892	4.8281	4.7148	5.1024	5.1257	4.9876	4.818	4.581	4.7188	4.7943	4.6428
pos_7485	N,N-Dimethylarginine	metab_6932	yes	C03626	pos	30315-93-6	203.15	0.607633	M+H	C8H18N4O2	34.2	0	HMDB0001539	-	-	-	-	-	Organic acids and derivatives	Carboxylic acids and derivatives	Amino acids, peptides, and analogues	34.2	0	-	-	1.234	1.2185	0.00147	0.009848	5.0238	5.0806	5.1304	5.074	5.0822	4.8434	4.944	4.9223	4.7225	4.9175
pos_7686	DL-Ornithino-L-alanine	metab_7153	yes	-	pos	25693-39-4	220.129	0.459617	M+H	C8H17N3O4	0	39	HMDB0029448	-	-	-	-	-	Organic acids and derivatives	Carboxylic acids and derivatives	Amino acids, peptides, and analogues	0	39	-	-	2.7065	2.6597	9.355e-07	5.592e-05	4.5942	4.4912	4.615	4.5799	4.5566	3.6005	3.6154	3.5849	3.8431	3.8558
pos_7699	Lysyl-Lysine	metab_7167	yes	-	pos	13184-13-9	138.107	0.436233	M+2H	C12H26N4O3	0	36.6	HMDB0304785;HMDB0028956	-	-	-	-	-	Organic acids and derivatives	Carboxylic acids and derivatives	Amino acids, peptides, and analogues	0	36.6	-	-	2.1794	2.137	0.001209	0.008595	3.9704	3.4473	3.8991	3.7814	3.9145	3.3429	3.2582	3.3338	2.9898	2.9212
pos_79	Gamma-Glutamylalanine	metab_7254	yes	C03740	pos	5875-41-2	219.097	0.91145	M+H, M+K, M+Na, M+ACN+Na	C8H14N2O5	0	68.7	HMDB0006248;HMDB0036301	-	-	map01100;map00480	Metabolism;Metabolism	Global and overview maps;Metabolism of other amino acids	Organic acids and derivatives	Carboxylic acids and derivatives	Amino acids, peptides, and analogues	0	68.7	Metabolic pathways;Glutathione metabolism	Metabolic pathways;Glutathione metabolism	1.943	1.9156	0.002168	0.01342	5.0474	5.102	5.2647	5.1025	5.5145	4.4027	4.8	4.7458	4.8576	4.6132
pos_800	L-2-Amino-4-methylenepentanedioic acid	metab_7267	yes	C00651	pos	16804-57-2	124.039	0.973967	M+H-2H2O, M+ACN+H	C6H9NO4	0	31.7	HMDB0029433	-	-	map00660	Metabolism	Carbohydrate metabolism	Organic acids and derivatives	Carboxylic acids and derivatives	Amino acids, peptides, and analogues	0	31.7	C5-Branched dibasic acid metabolism	C5-Branched dibasic acid metabolism	1.9783	1.9465	7.968e-10	2.749e-07	6.5364	6.5136	6.5373	6.5406	6.5517	6.0907	6.0718	6.0891	6.1125	6.0382
pos_82	Pyroglutamic Acid	metab_7288	yes	C01879	pos	98-79-3	130.05	1.23195	M+H, M+K, 2M+H, 2M+Na	C5H7NO3	73.3	0	PW_C000182;HMDB0000267;MJDBOTE0000549	Peptides	Amino acids	map01100;map00480	Metabolism;Metabolism	Global and overview maps;Metabolism of other amino acids	Organic acids and derivatives	Carboxylic acids and derivatives	Amino acids, peptides, and analogues	73.3	0	Metabolic pathways;Glutathione metabolism	Metabolic pathways;Glutathione metabolism	3.5414	3.4885	0.0002315	0.003926	7.1324	7.0283	7.1178	7.0717	7.1118	5.1053	5.8973	6.2828	5.0778	5.0673
pos_9	N-gamma-L-Glutamyl-D-alanine	metab_7376	yes	-	pos	-	219.097	0.623083	M+H, M+Na, M+ACN+H, M+ACN+Na, M+K, M+H-H2O	C8H14N2O5	0	57.7	HMDB0036301	-	-	-	-	-	Organic acids and derivatives	Carboxylic acids and derivatives	Amino acids, peptides, and analogues	0	57.7	-	-	1.4227	1.3947	0.02651	0.09119	5.3065	5.118	5.4556	5.1607	5.4591	4.8238	5.1094	4.974	5.2426	4.6721
pos_6601	1-Pyrroline-5-carboxylic acid	metab_7487	yes	C03912	pos	64199-88-8;2906-39-0	227.102	1.9914	2M+H	C5H7NO2	0	51.4	PW_C001003;HMDB0001301	-	-	map01100;map01110;map00330;map01230;map00250;map00332	Metabolism;Metabolism;Metabolism;Metabolism;Metabolism;Metabolism	Global and overview maps;Global and overview maps;Amino acid metabolism;Global and overview maps;Amino acid metabolism;Biosynthesis of other secondary metabolites	Organic acids and derivatives	Carboxylic acids and derivatives	Amino acids, peptides, and analogues	0	51.4	Metabolic pathways;Biosynthesis of secondary metabolites;Arginine and proline metabolism;Biosynthesis of amino acids;Alanine, aspartate and glutamate metabolism;Carbapenem biosynthesis	Metabolic pathways;Biosynthesis of secondary metabolites;Arginine and proline metabolism;Biosynthesis of amino acids;Alanine, aspartate and glutamate metabolism;Carbapenem biosynthesis	1.343	1.3213	2.439e-05	0.0006914	6.3758	6.4277	6.4777	6.37	6.3652	6.1655	6.2134	6.217	6.1606	6.1594
pos_1433	4-Hydroxy-L-glutamic acid	metab_7491	yes	C05947	pos	2485-33-8	205.082	0.607633	M+ACN+H	C5H9NO5	0	57.2	HMDB0002273;PW_C001535	-	-	map01100;map00330	Metabolism;Metabolism	Global and overview maps;Amino acid metabolism	Organic acids and derivatives	Carboxylic acids and derivatives	Amino acids, peptides, and analogues	0	57.2	Metabolic pathways;Arginine and proline metabolism	Metabolic pathways;Arginine and proline metabolism	2.9794	2.9229	0.000322	0.004298	4.6661	4.4957	5.1441	4.6422	5.4531	3.777	3.5408	3.7169	3.81	3.8819
pos_1481	L-Glutamic Acid	metab_7504	yes	C00025	pos	56-86-0;6893-26-1	148.06	0.778767	M+H	C5H9NO4	88.6	0	PW_C000095;HMDB0060475;HMDB0000148;HMDB0003339;MJDBOTE0000649	Peptides;Hormones and transmitters	Amino acids;Neurotransmitters	map00997;map02010;map01240;map01200;map00998;map00480;map00332;map04742;map00250;map05033;map04974;map04072;map04216;map00630;map00430;map04964;map00470;map00860;map04080;map05016;map05017;map05014;map04727;map01064;map04723;map05031;map04721;map01060;map01100;map00220;map04540;map01120;map01210;map00340;map00524;map01230;map04068;map05034;map01110;map00660;map05230;map04724;map05030;map00650;map…	Metabolism;Environmental Information Processing;Metabolism;Metabolism;Metabolism;Metabolism;Metabolism;Organismal Systems;Metabolism;Human Diseases;Organismal Systems;Environmental Information Processing;Cellular Processes;Metabolism;Metabolism;Organismal Systems;Metabolism;Metabolism;Environmental Information Processing;Human Diseases;Human Diseases;Human Diseases;Organismal Systems;Metabolism;O…	Biosynthesis of other secondary metabolites;Membrane transport;Global and overview maps;Global and overview maps;Biosynthesis of other secondary metabolites;Metabolism of other amino acids;Biosynthesis of other secondary metabolites;Sensory system;Amino acid metabolism;Substance dependence;Digestive system;Signal transduction;Cell growth and death;Carbohydrate metabolism;Metabolism of other amino…	Organic acids and derivatives	Carboxylic acids and derivatives	Amino acids, peptides, and analogues	88.6	0	Biosynthesis of various other secondary metabolites;ABC transporters;Biosynthesis of cofactors;Carbon metabolism;Biosynthesis of various antibiotics;Glutathione metabolism;Carbapenem biosynthesis;Taste transduction;Alanine, aspartate and glutamate metabolism;Nicotine addiction;Protein digestion and absorption;Phospholipase D signaling pathway;Ferroptosis;Glyoxylate and dicarboxylate metabolism;Ta…	Biosynthesis of various other secondary metabolites;ABC transporters;Biosynthesis of cofactors;Carbon metabolism;Biosynthesis of various antibiotics;Glutathione metabolism;Carbapenem biosynthesis;Taste transduction;Alanine, aspartate and glutamate metabolism;Nicotine addiction;Protein digestion and absorption;Phospholipase D signaling pathway;Ferroptosis;Glyoxylate and dicarboxylate metabolism;Ta…	3.8631	3.7953	3.445e-07	2.808e-05	6.7147	6.4764	6.6914	6.6273	6.7199	5.073	4.6099	4.7459	5.1891	4.8454
pos_1512	N-Epsilon-Acetyl-L-Lysine	metab_7507	yes	C02727	pos	87-51-4;692-04-6	189.123	0.927067	M+H	C8H16N2O3	54	0	HMDB0000206;HMDB0000197;MJDBOTE0000583	-	-	map01100;map00310	Metabolism;Metabolism	Global and overview maps;Amino acid metabolism	Organic acids and derivatives	Carboxylic acids and derivatives	Amino acids, peptides, and analogues	54	0	Metabolic pathways;Lysine degradation	Metabolic pathways;Lysine degradation	2.3425	2.3064	3.209e-06	0.0001485	5.6931	5.6779	5.6633	5.7167	5.7062	5.123	5.0181	5.1928	4.9757	4.8671
neg_2779	3-Amino-4-methoxybenzanilide	metab_9805	yes	-	neg	-	725.311	3.07162	3M-H	C14H14N2O2	0	81.7	HMDB0245807	-	-	-	-	-	Benzenoids	Benzene and substituted derivatives	Anilides	0	81.7	-	-	1.1452	1.1198	0.0002266	0.00146	4.9356	4.8692	4.7254	5.0538	4.918	5.2394	5.2265	5.2284	5.2486	5.25
neg_6837	N-[4-Methoxy-5-[[4-(1-methylindol-3-yl)pyrimidin-2-yl]amino]-2-[methyl-[2-(methylamino)ethyl]amino]phenyl]prop-2-enamide	metab_14206	yes	-	neg	-	506.225	4.48513	M+Na-2H	C27H31N7O2	0	46.9	HMDB0248755	-	-	-	-	-	Benzenoids	Benzene and substituted derivatives	Anilides	0	46.9	-	-	2.0333	1.9971	1.046e-09	1.481e-07	5.156	5.0835	5.0838	5.178	5.1218	4.0875	4.1262	4.1705	4.2315	4.1508
pos_6358	Mozenavir	metab_5750	yes	-	pos	-	501.265	2.28742	M+H-2H2O	C33H36N4O3	0	60.4	HMDB0254911	-	-	-	-	-	Benzenoids	Benzene and substituted derivatives	Aniline and substituted anilines	0	60.4	-	-	1.0302	1.018	0.0023	0.01403	5.4081	5.3311	5.4725	5.4787	5.4228	5.2716	5.2653	5.3336	5.213	5.2985
neg_924	Flavidulol C	metab_16819	yes	-	neg	117568-34-0	559.31	4.45322	M+K-2H, M+FA-H	C34H42O4	0	51.3	HMDB0039150	-	-	-	-	-	Benzenoids	Phenol ethers	Anisoles	0	51.3	-	-	1.6649	1.6183	2.817e-07	1.151e-05	5.3725	5.228	5.4245	5.3603	5.4052	4.6144	4.7133	4.7576	4.7272	4.6834
pos_5755	1-(Isothiocyanatomethyl)-4-methoxybenzene	metab_5101	yes	-	pos	3694-57-3	212.074	3.20808	M+CH3OH+H	C9H9NOS	0	40.7	HMDB0032581	-	-	-	-	-	Benzenoids	Phenol ethers	Anisoles	0	40.7	-	-	1.4094	1.3983	0.009893	0.0427	5.4769	5.4663	5.377	5.5734	5.5342	5.4891	5.0416	5.2336	5.0917	5.0751
pos_2253	4,4'-Thiobis(6-tert-butyl-m-cresol)	metab_1347	yes	-	pos	-	755.356	2.52915	2M+K	C22H30O2S	0	54	HMDB0247683	-	-	-	-	-	Organosulfur compounds	Thioethers	Aryl thioethers	0	54	-	-	1.0997	1.105	0.03101	0.1029	4.2861	4.6701	4.5116	4.2915	4.6142	4.2549	4.2622	4.2664	4.2709	4.2726
neg_2519	Paucine	metab_9520	yes	C03002	neg	29554-26-5	559.273	2.7259	2M+Hac-H	C13H18N2O3	0	44.8	HMDB0029876	-	-	-	-	-	Benzenoids	Phenols	Benzenediols	0	44.8	-	-	1.61	1.5672	2.277e-07	9.714e-06	4.9028	4.7531	4.914	4.9761	4.9397	4.2837	4.293	4.2848	4.2691	4.2747
neg_3459	Mirodenafil	metab_10553	yes	-	neg	-	530.247	3.89567	M-H	C26H37N5O5S	0	62.9	HMDB0254750	-	-	-	-	-	Benzenoids	Benzene and substituted derivatives	Benzenesulfonamides	0	62.9	-	-	2.6174	2.5432	0.004563	0.01401	4.4268	3.7516	4.6948	4.4485	4.7021	1.4035	3.32	3.6768	2.415	1.3949
neg_8634	(R)-3-((2-(2-(4-Methylpiperidin-1-yl)ethyl)pyrrolidin-1-yl)sulfonyl)phenol	metab_16162	yes	-	neg	-	749.359	2.52505	2M+FA-H	C18H28N2O3S	0	63.5	HMDB0245575	-	-	-	-	-	Benzenoids	Benzene and substituted derivatives	Benzenesulfonamides	0	63.5	-	-	1.0145	0.9816	0.005972	0.01709	4.6738	4.5139	4.528	4.7779	4.49	4.3399	4.2382	4.3948	4.1024	4.4183
pos_5653	2-Dodecylbenzenesulfonic acid	metab_5002	yes	-	pos	-	344.227	3.53455	M+NH4	C18H30O3S	0	30.4	HMDB0031031	-	-	-	-	-	Benzenoids	Benzene and substituted derivatives	Benzenesulfonic acids and derivatives	0	30.4	-	-	1.3127	1.2965	0.00674	0.03206	5.0851	5.0933	5.02	5.1533	5.1679	4.6694	4.8581	5.0618	4.8841	4.7626
neg_3863	(+)-Isofebrifugine	metab_10988	yes	-	neg	-	346.144	4.46122	M+FA-H	C16H19N3O3	0	55.6	HMDB0242253	-	-	-	-	-	Organoheterocyclic compounds	Diazanaphthalenes	Benzodiazines	0	55.6	-	-	1.4696	1.4331	0.001817	0.006891	4.3517	4.3165	4.5921	4.6525	4.6258	4.3042	3.9531	3.8501	3.6652	3.7722
neg_2941	Coutaric acid	metab_9985	yes	C01327	neg	-	394.198	3.24812	M+FA-H	C18H27N3O4	0	56.8	HMDB0029225	-	-	map04742;map04974	Organismal Systems;Organismal Systems	Sensory system;Digestive system	Benzenoids	Benzene and substituted derivatives	Benzoic acids and derivatives	0	56.8	Taste transduction;Protein digestion and absorption	Taste transduction;Protein digestion and absorption	1.7642	1.7151	2.193e-05	0.0002764	4.3617	4.7778	4.3712	4.481	4.2891	5.2417	5.2077	5.2372	5.2529	5.1759
neg_3909	Leonurine	metab_11039	yes	C16985	neg	24697-74-3	621.288	4.5494	2M-H	C14H21N3O5	0	59.5	HMDB0254014	-	-	-	-	-	Benzenoids	Benzene and substituted derivatives	Benzoic acids and derivatives	0	59.5	-	-	1.5397	1.4967	0.004651	0.01423	5.0531	4.8352	5.1638	5.1846	5.1817	4.6455	4.2537	4.6438	3.8186	4.6324
neg_6342	Methyl 3-benzoyloxy-8-(3-hydroxypropyl)-8-azabicyclo[3.2.1]octane-2-carboxylate	metab_13661	yes	-	neg	-	693.346	5.37268	2M-H	C19H25NO5	0	46.3	HMDB0257742	-	-	-	-	-	Benzenoids	Benzene and substituted derivatives	Benzoic acids and derivatives	0	46.3	-	-	2.3246	2.2859	6.457e-07	2.138e-05	4.701	4.7693	4.8764	4.5962	4.7655	3.3106	3.6901	3.3427	3.5834	3.3016
neg_7649	Trocimine	metab_15087	yes	-	neg	-	328.151	3.57782	M+Na-2H	C17H25NO4	0	32.6	HMDB0259289	-	-	-	-	-	Benzenoids	Benzene and substituted derivatives	Benzoic acids and derivatives	0	32.6	-	-	1.4122	1.3812	4.468e-09	4.239e-07	5.2901	5.2813	5.2876	5.295	5.3145	4.7973	4.8353	4.8856	4.7996	4.8033
neg_8166	Medroxalol	metab_15653	yes	-	neg	-	393.142	3.06362	M+Na-2H	C20H24N2O5	0	71.2	HMDB0254407	-	-	-	-	-	Benzenoids	Benzene and substituted derivatives	Benzoic acids and derivatives	0	71.2	-	-	2.1665	2.1544	0.003792	0.01223	4.4377	3.1051	4.8122	4.4026	4.8176	3.3112	2.8185	3.1452	2.7946	2.8002
pos_2022	P-Aminobenzoic acid	metab_7510	yes	C00568	pos	94-09-7;150-13-0	138.055	2.13927	M+H	C7H7NO2	39	0	HMDB0304171;HMDB0004992;HMDB0001392	-	-	map01100;map01120;map01240;map00627;map00790;map01061	Metabolism;Metabolism;Metabolism;Metabolism;Metabolism;Metabolism	Global and overview maps;Global and overview maps;Global and overview maps;Xenobiotics biodegradation and metabolism;Metabolism of cofactors and vitamins;Chemical structure transformation maps	Benzenoids	Benzene and substituted derivatives	Benzoic acids and derivatives	39	0	Metabolic pathways;Microbial metabolism in diverse environments;Biosynthesis of cofactors;Aminobenzoate degradation;Folate biosynthesis;Biosynthesis of phenylpropanoids	Metabolic pathways;Microbial metabolism in diverse environments;Biosynthesis of cofactors;Aminobenzoate degradation;Folate biosynthesis;Biosynthesis of phenylpropanoids	1.3982	1.3773	3.812e-07	2.94e-05	4.7489	4.7776	4.775	4.7501	4.7219	4.9816	4.9665	5.0306	4.9821	4.9693
neg_8942	Quinagolida	metab_16502	yes	-	neg	-	430.194	2.14767	M+Cl	C20H33N3O3S	0	60.8	HMDB0257030	-	-	-	-	-	Organoheterocyclic compounds	Quinolines and derivatives	Benzoquinolines	0	60.8	-	-	2.1641	2.1215	0.0005972	0.002998	5.7889	5.1567	6.3267	6.1808	6.3419	4.7074	4.7448	4.8223	4.7006	4.6455
pos_5832	Benzaldehyde	metab_5180	yes	C00261	pos	100-52-7	107.049	3.03658	M+H	C7H6O	0	42.1	HMDB0006115	-	-	map01100;map00627;map00623;map01120;map01220	Metabolism;Metabolism;Metabolism;Metabolism;Metabolism	Global and overview maps;Xenobiotics biodegradation and metabolism;Xenobiotics biodegradation and metabolism;Global and overview maps;Global and overview maps	Benzenoids	Benzene and substituted derivatives	Benzoyl derivatives	0	42.1	Metabolic pathways;Aminobenzoate degradation;Toluene degradation;Microbial metabolism in diverse environments;Degradation of aromatic compounds	Metabolic pathways;Aminobenzoate degradation;Toluene degradation;Microbial metabolism in diverse environments;Degradation of aromatic compounds	2.3958	2.3571	0.0002548	0.004202	3.5058	3.8009	3.9035	4.0976	3.4942	4.4724	4.5061	4.4892	4.5576	4.445
pos_6127	(S)-3-Hydroxy-N-methylcoclaurine	metab_5499	yes	C05202	pos	-	338.134	2.58367	M+Na	C18H21NO4	0	39.3	HMDB0006921	-	-	map00950;map01100;map01110;map01063	Metabolism;Metabolism;Metabolism;Metabolism	Biosynthesis of other secondary metabolites;Global and overview maps;Global and overview maps;Chemical structure transformation maps	Organoheterocyclic compounds	Isoquinolines and derivatives	Benzylisoquinolines	0	39.3	Isoquinoline alkaloid biosynthesis;Metabolic pathways;Biosynthesis of secondary metabolites;Biosynthesis of alkaloids derived from shikimate pathway	Isoquinoline alkaloid biosynthesis;Metabolic pathways;Biosynthesis of secondary metabolites;Biosynthesis of alkaloids derived from shikimate pathway	3.2405	3.2236	0.005567	0.02792	5.7171	3.7685	5.7845	5.6393	5.8166	3.7434	3.7507	3.7549	3.7757	4.1371
neg_4267	Aplaviroc	metab_11432	yes	-	neg	-	598.288	5.28432	M+Na-2H	C33H43N3O6	0	70.3	HMDB0248516	-	-	-	-	-	Organoheterocyclic compounds	Piperidines	Benzylpiperidines	0	70.3	-	-	1.1143	1.0941	1.081e-05	0.0001665	5.3795	5.4452	5.4332	5.496	5.3943	5.7317	5.7152	5.7864	5.7833	5.6571
pos_2335	Revefenacin	metab_1436	yes	-	pos	-	642.308	2.67748	M+2Na-H	C35H43N5O4	0	76.9	HMDB0304897	-	-	-	-	-	Organoheterocyclic compounds	Piperidines	Benzylpiperidines	0	76.9	-	-	2.3895	2.3521	3.29e-05	0.0008806	5.3497	5.3436	5.4022	5.327	5.3056	4.3926	4.6531	4.5601	4.7219	4.8906
neg_3375	Biapenem	metab_10460	yes	C11268	neg	120410-24-4	385.074	3.77698	M+Cl	C15H18N4O4S	0	30.1	HMDB0249178	-	-	-	-	-	Organoheterocyclic compounds	Lactams	Beta lactams	0	30.1	-	-	1.1173	1.3472	0.02511	0.05227	4.3486	4.1349	4.6344	4.4243	4.7436	4.7277	5.0525	5.1095	4.5301	4.9608
neg_146	Cholylvaline	metab_8387	yes	-	neg	-	488.338	5.77997	M-H2O-H, M+FA-H, M-H	C29H49NO6	0	56.5	HMDB0242380	-	-	-	-	-	Lipids and lipid-like molecules	Steroids and steroid derivatives	Bile acids, alcohols and derivatives	0	56.5	-	-	1.1239	1.0908	0.0007812	0.003671	4.775	4.9001	4.8743	4.8323	4.6545	5.1815	5.278	5.0083	5.175	5.072
neg_2694	3-dehydrocholate	metab_9712	yes	-	neg	2304-89-4	426.236	2.96727	M+Na-2H	C24H37O5-	0	45.3	HMDB0000502;HMDB0304121	-	-	-	-	-	Lipids and lipid-like molecules	Steroids and steroid derivatives	Bile acids, alcohols and derivatives	0	45.3	-	-	1.41	1.3608	0.001431	0.00576	4.3211	4.1486	4.2943	4.3247	4.2682	3.3879	3.5923	3.9706	3.8397	3.8919
neg_3398	Taurohyocholate	metab_10485	yes	C15516	neg	117997-17-8	560.294	3.809	M+FA-H	C26H45NO7S	0	48.5	LMST05040010;HMDB0011637	-	-	-	-	-	Lipids and lipid-like molecules	Steroids and steroid derivatives	Bile acids, alcohols and derivatives	0	48.5	-	-	3.9487	3.8508	8.813e-06	0.0001465	4.5354	3.8856	4.2857	4.5163	4.5751	0.0014	0.0015	1.3126	1.586	0.0014
neg_3485	Sulfoglycolithocholate(2-)	metab_10582	yes	-	neg	-	512.272	3.92518	M-H	C26H43NO7S	0	49.6	HMDB0062801	-	-	-	-	-	Lipids and lipid-like molecules	Steroids and steroid derivatives	Bile acids, alcohols and derivatives	0	49.6	-	-	1.1734	1.1513	0.0003866	0.002183	4.6128	4.6377	4.6582	4.5988	4.6484	4.3722	4.0617	4.3433	4.2156	4.3728
neg_4701	Glycocholic acid	metab_11903	yes	C01921	neg	475-31-0;68753-51-5	446.29	5.74812	M-H2O-H	C26H43NO6	0	65.8	HMDB0000138;LMST05030001;PW_C000089;HMDB0000331	Steroids	24-Carbon atoms	map01100;map04976;map04979;map00121;map00120	Metabolism;Organismal Systems;Organismal Systems;Metabolism;Metabolism	Global and overview maps;Digestive system;Digestive system;Lipid metabolism;Lipid metabolism	Lipids and lipid-like molecules	Steroids and steroid derivatives	Bile acids, alcohols and derivatives	0	65.8	Metabolic pathways;Bile secretion;Cholesterol metabolism;Secondary bile acid biosynthesis;Primary bile acid biosynthesis	Metabolic pathways;Bile secretion;Cholesterol metabolism;Secondary bile acid biosynthesis;Primary bile acid biosynthesis	1.7372	1.686	7.986e-05	0.000703	5.1977	5.0101	5.2122	5.1233	5.1268	4.5212	4.2676	4.5711	4.055	4.4819
neg_5790	Chenodeoxycholylglycine	metab_13073	yes	C05466	neg	640-79-9	448.307	5.7879	M-H	C26H43NO5	0	33.4	HMDB0242392;HMDB0000637	-	-	map04976;map04979;map00121;map00120	Organismal Systems;Organismal Systems;Metabolism;Metabolism	Digestive system;Digestive system;Lipid metabolism;Lipid metabolism	Lipids and lipid-like molecules	Steroids and steroid derivatives	Bile acids, alcohols and derivatives	0	33.4	Bile secretion;Cholesterol metabolism;Secondary bile acid biosynthesis;Primary bile acid biosynthesis	Bile secretion;Cholesterol metabolism;Secondary bile acid biosynthesis;Primary bile acid biosynthesis	3.5169	3.4571	5.959e-09	5.293e-07	5.1664	5.0425	5.2493	5.1379	5.2537	2.6788	2.1538	2.1457	2.1301	2.1356
pos_3	Cholic Acid	metab_2133	yes	C00695	pos	81-25-4	817.581	5.83243	M+H-2H2O, 2M+NH4, 2M+H, M+K, M+H-H2O, M+NH4, M+H	C24H40O5	85.5	0	HMDB0000619;LMST04010001;PW_C000480;MJDBDZS0000046	Steroids	24-Carbon atoms	map01100;map04976;map00121;map00120	Metabolism;Organismal Systems;Metabolism;Metabolism	Global and overview maps;Digestive system;Lipid metabolism;Lipid metabolism	Lipids and lipid-like molecules	Steroids and steroid derivatives	Bile acids, alcohols and derivatives	85.5	0	Metabolic pathways;Bile secretion;Secondary bile acid biosynthesis;Primary bile acid biosynthesis	Metabolic pathways;Bile secretion;Secondary bile acid biosynthesis;Primary bile acid biosynthesis	1.0481	1.0323	0.001115	0.008052	7.8969	7.8291	7.8836	7.8549	7.8675	7.6771	7.6781	7.7805	7.6691	7.7912
pos_3582	Ursocholic acid	metab_2771	yes	C17644	pos	2955-27-3	426.321	6.21195	M+NH4	C24H40O5	0	58.7	HMDB0000917;LMST04010088;HMDB0249206	-	-	map00121	Metabolism	Lipid metabolism	Lipids and lipid-like molecules	Steroids and steroid derivatives	Bile acids, alcohols and derivatives	0	58.7	Secondary bile acid biosynthesis	Secondary bile acid biosynthesis	1.7074	1.6937	0.003211	0.01835	5.6528	5.5357	5.627	5.6305	5.6864	4.9714	5.2218	5.3612	5.0239	5.4798
pos_4744	Chenodeoxycholylarginine	metab_4045	yes	-	pos	-	549.4	5.6684	M+H	C30H52N4O5	0	42.5	HMDB0242396	-	-	-	-	-	Lipids and lipid-like molecules	Steroids and steroid derivatives	Bile acids, alcohols and derivatives	0	42.5	-	-	3.3844	3.3198	2.56e-07	2.319e-05	4.7734	5.063	4.594	4.6647	4.7292	6.139	6.0564	6.1898	6.0394	6.1364
pos_5926	Glycocholenate sulfate	metab_5280	yes	-	pos	-	585.287	2.88815	M+ACN+H	C26H41NO9S	0	63.3	HMDB0242178	-	-	-	-	-	Lipids and lipid-like molecules	Steroids and steroid derivatives	Bile acids, alcohols and derivatives	0	63.3	-	-	3.1307	3.0822	2.965e-08	4.089e-06	5.733	5.8404	5.9142	5.8746	5.9218	4.6372	4.7942	4.7099	4.8108	4.588
pos_823	7a,12a-Dihydroxy-3-oxo-4-cholenoic acid	metab_7292	yes	C15568	pos	13587-11-6	405.263	5.67623	M+H, M+Na	C24H36O5	0	43.6	HMDB0000447	-	-	-	-	-	Lipids and lipid-like molecules	Steroids and steroid derivatives	Bile acids, alcohols and derivatives	0	43.6	-	-	1.4313	1.4359	0.008518	0.03802	6.3656	6.5161	6.2334	6.3734	6.3287	6.9225	6.6513	6.5379	6.7523	6.4984
pos_3998	Alpha-Muricholic Acid	metab_7494	yes	C17647	pos	39016-49-4;2393-58-0;2393-59-1;6830-03-1	426.321	7.3054	M+NH4	C24H40O5	81.1	0	HMDB0000865;HMDB0000364;HMDB0000506;LMST04010066;HMDB0000415;MJDBDZS0000028	-	-	map00121	Metabolism	Lipid metabolism	Lipids and lipid-like molecules	Steroids and steroid derivatives	Bile acids, alcohols and derivatives	81.1	0	Secondary bile acid biosynthesis	Secondary bile acid biosynthesis	1.4892	1.4659	0.0004805	0.004298	6.1913	6.0765	6.271	6.2155	6.2595	5.9207	5.8452	6.0187	5.8215	5.9712
neg_7726	Stercobilin	metab_15172	yes	C05793	neg	34217-90-8	631.294	3.49782	M+K-2H	C33H46N4O6	0	79.8	HMDB0240259	-	-	map00860	Metabolism	Metabolism of cofactors and vitamins	Organoheterocyclic compounds	Tetrapyrroles and derivatives	Bilirubins	0	79.8	Porphyrin metabolism	Porphyrin metabolism	2.1261	2.0688	0.0001078	0.0008771	5.1944	4.6989	5.1402	5.2098	5.1802	4.1796	3.462	3.9223	4.0251	4.1413
neg_3995	Fumitremorgin B	metab_11131	yes	C20630	neg	12626-17-4	478.231	4.71913	M-H	C27H33N3O5	0	48.8	HMDB0030203	-	-	map01100;map01110;map00404	Metabolism;Metabolism;Metabolism	Global and overview maps;Global and overview maps;Biosynthesis of other secondary metabolites	Organoheterocyclic compounds	Indoles and derivatives	Carbazoles	0	48.8	Metabolic pathways;Biosynthesis of secondary metabolites;Staurosporine biosynthesis	Metabolic pathways;Biosynthesis of secondary metabolites;Staurosporine biosynthesis	1.8803	1.8341	0.0002961	0.001766	5.1395	4.4862	5.2553	4.9771	5.2185	4.1575	3.9716	4.2623	4.0167	4.1145
neg_8215	Hydroxylated N-acetyl desmethyl frovatriptan	metab_15707	yes	-	neg	-	334.141	3.02375	M+FA-H	C15H19N3O3	0	57.1	HMDB0061151	-	-	-	-	-	Organoheterocyclic compounds	Indoles and derivatives	Carbazoles	0	57.1	-	-	1.041	1.018	9.176e-08	4.694e-06	6.1724	6.1636	6.2296	6.1942	6.1799	5.9207	5.9156	5.9274	5.9631	5.9287
neg_160	D-Sorbitol	metab_8541	yes	C00794	neg	50-70-4	181.071	0.568333	M-H, M+FA-H, M+Cl	C6H14O6	52.2	0	HMDB0000247;MJDBOTE0001050	Carbohydrates	Monosaccharides	map01100;map02010;map00051;map00052;map02060;map05415	Metabolism;Environmental Information Processing;Metabolism;Metabolism;Environmental Information Processing;Human Diseases	Global and overview maps;Membrane transport;Carbohydrate metabolism;Carbohydrate metabolism;Membrane transport;Cardiovascular disease	Organic oxygen compounds	Organooxygen compounds	Carbohydrates and carbohydrate conjugates	52.2	0	Metabolic pathways;ABC transporters;Fructose and mannose metabolism;Galactose metabolism;Phosphotransferase system (PTS);Diabetic cardiomyopathy	Metabolic pathways;ABC transporters;Fructose and mannose metabolism;Galactose metabolism;Phosphotransferase system (PTS);Diabetic cardiomyopathy	2.2258	2.2335	0.0007821	0.003672	4.7785	4.8983	4.8103	3.927	4.0164	2.8881	3.4999	3.1007	3.4744	2.8791
neg_1921	6-Methyl 2-galloylgalactarate	metab_8873	yes	-	neg	-	413.01	1.5009	M+K-2H	C14H16O12	0	32.5	HMDB0036934	-	-	-	-	-	Organic oxygen compounds	Organooxygen compounds	Carbohydrates and carbohydrate conjugates	0	32.5	-	-	1.3992	1.3673	0.0001388	0.001044	5.0813	5.0682	4.9714	5.0402	4.9921	4.4258	4.4351	4.7041	4.4112	4.7101
neg_2024	Ribostamycin	metab_8983	yes	C01759	neg	25546-65-0	489.195	1.85948	M+Cl	C17H34N4O10	0	89.1	HMDB0257216	-	-	map01110;map00524	Metabolism;Metabolism	Global and overview maps;Biosynthesis of other secondary metabolites	Organic oxygen compounds	Organooxygen compounds	Carbohydrates and carbohydrate conjugates	0	89.1	Biosynthesis of secondary metabolites;Neomycin, kanamycin and gentamicin biosynthesis	Biosynthesis of secondary metabolites;Neomycin, kanamycin and gentamicin biosynthesis	2.5145	2.4504	5.496e-08	3.275e-06	4.8745	4.6907	5.1049	5.0428	5.0746	3.4619	3.4712	3.463	3.4473	3.4529
neg_2043	Hygromycin B	metab_9004	yes	C01925	neg	31282-04-9	572.232	1.87547	M+FA-H	C20H37N3O13	0	77.1	HMDB0034229	-	-	-	-	-	Organic oxygen compounds	Organooxygen compounds	Carbohydrates and carbohydrate conjugates	0	77.1	-	-	1.0707	1.0397	0.0002758	0.001675	5.3243	5.2627	5.4602	5.4787	5.4311	5.1684	5.0709	5.0919	5.1213	5.027
neg_3529	N-Acetylmuramoyl-Ala	metab_10629	yes	C02999	neg	-	345.13	3.98907	M-H2O-H	C14H24N2O9	0	40.4	HMDB0060494	-	-	-	-	-	Organic oxygen compounds	Organooxygen compounds	Carbohydrates and carbohydrate conjugates	0	40.4	-	-	1.2597	1.2622	3.66e-06	7.79e-05	4.5199	4.5486	4.5713	4.5781	4.6336	4.9125	4.9621	5.0635	4.9105	4.9246
neg_3808	2-O-alpha-D-Galactopyranosyl-1-deoxynojirimycin	metab_10932	yes	-	neg	155168-05-1	360.106	4.37305	M+Cl	C12H23NO9	0	35.9	HMDB0041337	-	-	-	-	-	Organic oxygen compounds	Organooxygen compounds	Carbohydrates and carbohydrate conjugates	0	35.9	-	-	1.0655	1.2534	0.04025	0.07729	3.7085	4.0013	3.2636	4.1042	3.4156	3.3937	3.3157	3.2671	3.2514	3.257
neg_3973	Gentamicin C	metab_11108	yes	C01918	neg	11097-82-8	470.262	4.66198	M+Na-2H	C19H39N5O7	0	59.8	HMDB0252688	Antibiotics	Aminoglycosides	-	-	-	Organic oxygen compounds	Organooxygen compounds	Carbohydrates and carbohydrate conjugates	0	59.8	-	-	1.1665	1.1319	0.001288	0.005351	4.6726	4.4772	4.7215	4.5896	4.6868	4.1064	4.1683	4.24	4.4607	4.3298
neg_4145	Dactimicin	metab_11298	yes	C17979	neg	73196-97-1	477.272	5.03642	M+FA-H	C18H36N6O6	0	75.7	HMDB0250824	-	-	-	-	-	Organic oxygen compounds	Organooxygen compounds	Carbohydrates and carbohydrate conjugates	0	75.7	-	-	1.7447	1.7023	1.319e-07	6.196e-06	6.0978	5.9359	6.0549	6.0655	6.1445	5.3309	5.2783	5.37	5.4088	5.2985
neg_5512	1-(4-O-beta-D-glucopyranosyl-3-methoxyphenyl)-3,5-dihydroxydecane	metab_12772	yes	-	neg	-	475.267	6.46495	M+Na-2H	C25H42O7	0	40	HMDB0303085	-	-	-	-	-	Organic oxygen compounds	Organooxygen compounds	Carbohydrates and carbohydrate conjugates	0	40	-	-	1.5031	1.4595	9.323e-05	0.0007812	6.1779	6.0866	6.3578	6.063	6.1047	5.4462	5.5247	5.6302	5.5624	5.7898
neg_6429	NeuAc(alpha->6)GalNAc(alpha1->O)Ser	metab_13757	yes	-	neg	-	580.205	5.23035	M-H2O-H	C22H37N3O16	0	90.1	HMDB0255554	-	-	-	-	-	Organic oxygen compounds	Organooxygen compounds	Carbohydrates and carbohydrate conjugates	0	90.1	-	-	2.0547	2.055	0.011	0.02708	5.341	3.8412	5.3766	5.3279	5.3756	3.8567	3.2217	4.4647	3.1978	4.089
neg_7664	Dide-O-methyl-4-O-alpha-D-glucopyranosylsimmondsin	metab_15104	yes	-	neg	370068-00-1	490.158	3.56182	M-H2O-H	C20H31NO14	0	77.1	HMDB0038329	-	-	-	-	-	Organic oxygen compounds	Organooxygen compounds	Carbohydrates and carbohydrate conjugates	0	77.1	-	-	1.5559	1.5222	2.002e-06	5.175e-05	5.0964	5.0919	5.1181	5.1533	5.2116	4.6164	4.5621	4.6314	4.5569	4.391
neg_8381	Dibekacin	metab_15887	yes	-	neg	-	472.241	2.84632	M+Na-2H	C18H37N5O8	0	56.7	HMDB0251157	-	-	-	-	-	Organic oxygen compounds	Organooxygen compounds	Carbohydrates and carbohydrate conjugates	0	56.7	-	-	1.0307	1.0262	5.95e-05	0.0005682	4.7262	4.7859	4.8772	4.8093	4.8783	5.1205	5.062	5.0787	5.1171	5.0187
neg_8702	[[(3R,4R,5S,6R)-3-Acetamido-4,5-dihydroxy-6-(hydroxymethyl)oxan-2-yl]amino] N-phenylcarbamate	metab_16238	yes	-	neg	-	354.131	2.44458	M-H	C15H21N3O7	0	39.8	HMDB0247872	-	-	-	-	-	Organic oxygen compounds	Organooxygen compounds	Carbohydrates and carbohydrate conjugates	0	39.8	-	-	1.1256	1.0953	0.000578	0.002928	5.5129	5.3378	5.5217	5.5743	5.5359	5.0633	5.2318	5.2698	5.0566	5.2043
neg_8855	2-(Arabinosylamino)-3-(glucosylamino)propanenitrile	metab_16407	yes	-	neg	26401-22-9	360.141	2.26802	M-H2O-H	C14H25N3O9	0	36.1	HMDB0039505	-	-	-	-	-	Organic oxygen compounds	Organooxygen compounds	Carbohydrates and carbohydrate conjugates	0	36.1	-	-	1.9966	1.9777	0.004312	0.01343	4.5803	3.7512	5.0007	4.8055	5.01	3.6236	3.0566	3.7942	3.0823	3.8646
neg_3517	Glucosamine	metab_17609	yes	C00329	neg	3416-24-8;14257-69-3	536.236	3.97313	3M-H	C6H13NO5	0	32.6	HMDB0001514;HMDB0245095;HMDB0242589;HMDB0030091;PW_C001167	Carbohydrates	Monosaccharides	map01100;map00520;map02060;map01250	Metabolism;Metabolism;Environmental Information Processing;Metabolism	Global and overview maps;Carbohydrate metabolism;Membrane transport;Global and overview maps	Organic oxygen compounds	Organooxygen compounds	Carbohydrates and carbohydrate conjugates	0	32.6	Metabolic pathways;Amino sugar and nucleotide sugar metabolism;Phosphotransferase system (PTS);Biosynthesis of nucleotide sugars	Metabolic pathways;Amino sugar and nucleotide sugar metabolism;Phosphotransferase system (PTS);Biosynthesis of nucleotide sugars	2.9685	2.8891	0.000234	0.001488	4.9362	3.7327	5.1655	4.8074	5.1877	3.4021	2.5878	2.1676	2.152	2.1576
pos_158	Rutinose	metab_630	yes	C08247	pos	90-74-4	365.084	0.615283	M+K, M+2Na-H, M+Na	C12H22O10	0	33.7	HMDB0302439;HMDB0247100	Carbohydrates	Oligosaccharides	-	-	-	Organic oxygen compounds	Organooxygen compounds	Carbohydrates and carbohydrate conjugates	0	33.7	-	-	1.0597	1.0353	0.01227	0.05098	5.2531	5.2257	5.1484	5.4043	5.2171	5.4875	5.4622	5.4477	5.3025	5.4067
pos_1622	(2S,3S,4S,5R)-3,4,5-Trihydroxy-6-sulfooxyoxane-2-carboxylic acid	metab_678	yes	-	pos	-	275.007	1.3487	M+H	C6H10O10S	0	33.2	HMDB0258086	-	-	-	-	-	Organic oxygen compounds	Organooxygen compounds	Carbohydrates and carbohydrate conjugates	0	33.2	-	-	1.9684	1.9418	3.649e-07	2.881e-05	5.9757	5.9244	5.8856	5.8837	5.8844	5.4085	5.4648	5.42	5.4245	5.5422
pos_1708	Neolinustatin	metab_763	yes	C08336	pos	72229-42-6	456.208	1.71937	M+CH3OH+H	C17H29NO11	0	56.8	HMDB0038482	-	-	-	-	-	Organic oxygen compounds	Organooxygen compounds	Carbohydrates and carbohydrate conjugates	0	56.8	-	-	1.8445	1.8228	0.0007333	0.005724	6.1911	6.1604	6.167	6.1929	6.1976	5.9076	5.6824	5.6397	5.9535	5.5129
pos_1992	Tobramycin	metab_1067	yes	C00397	pos	32986-56-4	531.276	2.08483	M+ACN+Na	C18H37N5O9	0	74.4	HMDB0014822;PW_C009161	-	-	map01110;map00524	Metabolism;Metabolism	Global and overview maps;Biosynthesis of other secondary metabolites	Organic oxygen compounds	Organooxygen compounds	Carbohydrates and carbohydrate conjugates	0	74.4	Biosynthesis of secondary metabolites;Neomycin, kanamycin and gentamicin biosynthesis	Biosynthesis of secondary metabolites;Neomycin, kanamycin and gentamicin biosynthesis	3.4734	3.4016	0.0008337	0.006342	5.4082	4.667	6.092	5.1803	6.0993	3.9662	3.4773	3.9681	4.2831	3.8647
pos_2066	Flurithromycin	metab_1145	yes	-	pos	-	398.718	2.21723	M+2Na	C37H66FNO13	0	92.7	HMDB0252409	-	-	-	-	-	Organic oxygen compounds	Organooxygen compounds	Carbohydrates and carbohydrate conjugates	0	92.7	-	-	1.2384	1.2168	0.00633	0.03052	5.118	5.162	5.2521	5.1707	5.0472	4.8423	4.9891	4.9434	5.0718	4.7892
pos_2160	Galactoarabinan	metab_1248	yes	-	pos	-	465.197	2.3655	M+H-2H2O	C20H36O14	0	55.1	HMDB0252576	-	-	-	-	-	Organic oxygen compounds	Organooxygen compounds	Carbohydrates and carbohydrate conjugates	0	55.1	-	-	2.3663	2.3258	2.734e-07	2.391e-05	6.1303	6.0861	6.1562	6.1432	6.1665	5.3398	5.448	5.5787	5.5137	5.4955
pos_2386	Agar	metab_1492	yes	C08815	pos	9002-18-0	319.14	2.80235	M+H-H2O	C14H24O9	0	42.4	HMDB0248056	-	-	-	-	-	Organic oxygen compounds	Organooxygen compounds	Carbohydrates and carbohydrate conjugates	0	42.4	-	-	1.4938	1.4777	0.009224	0.04047	4.1502	4.0967	4.2366	4.4707	3.9407	4.6444	4.4807	4.4508	4.628	4.3995
pos_2633	Netilmicin	metab_1757	yes	C07657	pos	56391-56-1	539.318	3.46468	M+ACN+Na	C21H41N5O7	0	56.7	HMDB0015090;PW_C009396	-	-	-	-	-	Organic oxygen compounds	Organooxygen compounds	Carbohydrates and carbohydrate conjugates	0	56.7	-	-	2.0102	1.9776	3.41e-07	2.808e-05	5.3424	5.4011	5.4813	5.5154	5.399	4.9405	4.9477	4.952	4.9565	4.9581
pos_6055	6-Deoxy-4-O-(3,6-di-O-methyl-beta-D-glucopyranosyl)-2,3-di-O-methyl-alpha-L-mannopyranose	metab_5420	yes	-	pos	-	383.192	2.6853	M+H	C16H30O10	0	59.8	HMDB0249889	-	-	-	-	-	Organic oxygen compounds	Organooxygen compounds	Carbohydrates and carbohydrate conjugates	0	59.8	-	-	3.32	3.2769	2.741e-06	0.0001326	5.1217	5.261	5.2856	5.1364	5.202	3.7586	4.315	3.7701	3.7746	3.7763
pos_6156	Aminodeoxykanamycin	metab_5531	yes	C01822	pos	8063-07-08	522.219	2.54465	M+K	C18H37N5O10	0	81.9	HMDB0242522;HMDB0015303	-	-	map01110;map00524	Metabolism;Metabolism	Global and overview maps;Biosynthesis of other secondary metabolites	Organic oxygen compounds	Organooxygen compounds	Carbohydrates and carbohydrate conjugates	0	81.9	Biosynthesis of secondary metabolites;Neomycin, kanamycin and gentamicin biosynthesis	Biosynthesis of secondary metabolites;Neomycin, kanamycin and gentamicin biosynthesis	2.2475	2.2071	1.936e-07	1.877e-05	6.023	5.966	6.0825	6.018	5.9852	5.5035	5.3504	5.4816	5.3712	5.4029
pos_6330	Ethyl beta-D-glucopyranoside	metab_5722	yes	-	pos	3198-49-0	458.223	2.31858	2M+ACN+H	C8H16O6	0	37	HMDB0029968	-	-	-	-	-	Organic oxygen compounds	Organooxygen compounds	Carbohydrates and carbohydrate conjugates	0	37	-	-	1.4677	1.4435	2.755e-06	0.0001326	6.2514	6.2417	6.2761	6.2705	6.2676	6.0082	6.0206	6.0689	5.9417	5.9781
pos_6377	Validamycin A	metab_5771	yes	C12112	pos	37248-47-8	515.245	2.26397	M+NH4	C20H35NO13	0	52.3	HMDB0036592	-	-	map01100;map01110;map00525	Metabolism;Metabolism;Metabolism	Global and overview maps;Global and overview maps;Biosynthesis of other secondary metabolites	Organic oxygen compounds	Organooxygen compounds	Carbohydrates and carbohydrate conjugates	0	52.3	Metabolic pathways;Biosynthesis of secondary metabolites;Acarbose and validamycin biosynthesis	Metabolic pathways;Biosynthesis of secondary metabolites;Acarbose and validamycin biosynthesis	1.0334	1.0141	9.481e-05	0.001977	6.8123	6.8066	6.826	6.8247	6.8344	6.6826	6.6448	6.7537	6.6768	6.6806
pos_6934	Cis-Zeatin-7-N-glucoside	metab_6361	yes	-	pos	823188-69-8	414.198	1.75058	M+CH3OH+H	C16H23N5O6	0	54.2	HMDB0012201	-	-	-	-	-	Organic oxygen compounds	Organooxygen compounds	Carbohydrates and carbohydrate conjugates	0	54.2	-	-	1.1078	1.086	0.0009756	0.007229	6.5701	6.5086	6.5528	6.5472	6.5388	6.4429	6.3322	6.3556	6.4661	6.3177
neg_8871	Carboquone	metab_16425	yes	-	neg	-	366.131	2.25203	M+FA-H	C15H19N3O5	0	45	HMDB0249646	-	-	-	-	-	Organic oxygen compounds	Organooxygen compounds	Carbonyl compounds	0	45	-	-	1.7144	1.7536	0.01067	0.02644	3.9267	3.0645	4.5847	4.1751	4.4502	3.1132	3.0827	3.0745	3.0589	3.3361
pos_4821	(2E,4E)-2,4-Dodecadienal	metab_4129	yes	-	pos	21662-16-8	222.185	5.55063	M+ACN+H	C12H20O	0	32.4	HMDB0039590	-	-	-	-	-	Organic oxygen compounds	Organooxygen compounds	Carbonyl compounds	0	32.4	-	-	1.4874	1.4857	0.004193	0.02265	5.392	5.1276	5.3063	5.2627	5.4276	4.8738	5.0192	5.1486	4.8204	5.0632
pos_5972	4-(2-Aminophenyl)-2,4-dioxobutanoic acid	metab_5329	yes	C01252	pos	90924-76-8	190.05	2.81802	M+H-H2O	C10H9NO4	0	59.6	HMDB0000978;PW_C000778	-	-	map01100;map00380	Metabolism;Metabolism	Global and overview maps;Amino acid metabolism	Organic oxygen compounds	Organooxygen compounds	Carbonyl compounds	0	59.6	Metabolic pathways;Tryptophan metabolism	Metabolic pathways;Tryptophan metabolism	1.359	1.3453	0.001777	0.01138	4.9804	5.0318	4.9252	5.0054	4.9436	5.3557	5.1328	5.2236	5.3436	5.1043
pos_2088	4-Aminobutyraldehyde	metab_7490	yes	C00555	pos	4390-05-0	129.102	2.25615	M+ACN+H	C4H9NO	0	34.2	HMDB0001080	-	-	map01100;map00330;map00410	Metabolism;Metabolism;Metabolism	Global and overview maps;Amino acid metabolism;Metabolism of other amino acids	Organic oxygen compounds	Organooxygen compounds	Carbonyl compounds	0	34.2	Metabolic pathways;Arginine and proline metabolism;beta-Alanine metabolism	Metabolic pathways;Arginine and proline metabolism;beta-Alanine metabolism	1.4659	1.4326	0.04855	0.1431	3.6067	2.8962	3.5332	3.5546	2.9108	2.8846	2.8784	2.8826	2.8871	3.0437
neg_6630	Dimerum acid	metab_13980	yes	-	neg	-	465.235	4.8244	M-H2O-H	C22H36N4O8	0	60	HMDB0251372	-	-	-	-	-	Organic acids and derivatives	Carboximidic acids and derivatives	Carboximidic acids	0	60	-	-	2.5987	2.6221	0.01578	0.03591	4.3236	1.5505	5.0483	4.1771	5.0862	1.5592	1.5682	1.7593	2.9848	1.5504
pos_1727	Laninamivir	metab_784	yes	C21557	pos	203120-17-6	388.182	1.74277	M+ACN+H	C13H22N4O7	0	43.8	HMDB0253972	-	-	-	-	-	Organic acids and derivatives	Carboxylic acids and derivatives	Carboxylic acid derivatives	0	43.8	-	-	2.794	2.7495	3.45e-05	0.0009132	5.8087	5.6795	5.8004	5.8494	5.8354	4.879	4.8455	4.5175	5.2083	4.7602
pos_7488	Propionic acid	metab_6935	yes	C00163	pos	1979-09-04	116.071	0.607633	M+ACN+H	C3H6O2	0	47.2	HMDB0000237;LMFA01010003;PW_C000159	Organic acids	Carboxylic acids	map01100;map01220;map00640;map00642;map01120;map00760;map04973;map04974	Metabolism;Metabolism;Metabolism;Metabolism;Metabolism;Metabolism;Organismal Systems;Organismal Systems	Global and overview maps;Global and overview maps;Carbohydrate metabolism;Xenobiotics biodegradation and metabolism;Global and overview maps;Metabolism of cofactors and vitamins;Digestive system;Digestive system	Organic acids and derivatives	Carboxylic acids and derivatives	Carboxylic acids	0	47.2	Metabolic pathways;Degradation of aromatic compounds;Propanoate metabolism;Ethylbenzene degradation;Microbial metabolism in diverse environments;Nicotinate and nicotinamide metabolism;Carbohydrate digestion and absorption;Protein digestion and absorption	Metabolic pathways;Degradation of aromatic compounds;Propanoate metabolism;Ethylbenzene degradation;Microbial metabolism in diverse environments;Nicotinate and nicotinamide metabolism;Carbohydrate digestion and absorption;Protein digestion and absorption	1.5003	1.4729	0.02773	0.09446	5.9776	5.9509	6.7086	6.0939	6.1666	5.8419	5.8	5.7756	5.8324	5.7886
neg_9265	(E,E)-1-Chloro-3,11-tridecadiene-5,7,9-triyn-2-ol	metab_16845	yes	-	neg	-	239.026	1.68317	M+Na-2H	C13H11ClO	0	34.4	HMDB0034007	-	-	-	-	-	Organohalogen compounds	Halohydrins	Chlorohydrins	0	34.4	-	-	2.184	2.1616	0.004337	0.0135	3.5767	1.7518	3.5986	3.3626	3.3314	1.7606	1.7697	1.7616	1.7462	1.7517
pos_1380	Lathosterol	metab_418	yes	C01189	pos	80-99-9	369.351	0.389417	M+H-H2O	C27H46O	55.4	0	HMDB0001170;LMST01010089;PW_C000908	-	-	map01100;map01110;map00100	Metabolism;Metabolism;Metabolism	Global and overview maps;Global and overview maps;Lipid metabolism	Lipids and lipid-like molecules	Steroids and steroid derivatives	Cholestane steroids	55.4	0	Metabolic pathways;Biosynthesis of secondary metabolites;Steroid biosynthesis	Metabolic pathways;Biosynthesis of secondary metabolites;Steroid biosynthesis	1.5883	1.5658	0.0239	0.0842	6.4905	6.3933	6.3168	6.3202	6.2845	6.2205	6.7921	6.9028	6.9304	7.0596
pos_1927	Polyporusterone C	metab_997	yes	-	pos	141360-90-9	521.281	1.97592	M+2Na-H	C28H44O6	0	54.3	HMDB0038497	-	-	-	-	-	Lipids and lipid-like molecules	Steroids and steroid derivatives	Cholestane steroids	0	54.3	-	-	2.4122	2.4033	0.001433	0.009676	2.6639	2.3232	2.5056	2.828	2.0543	2.9815	3.3777	3.1803	3.5378	3.2034
neg_6780	Porson	metab_14144	yes	-	neg	56222-03-8	421.14	4.56542	M+Cl	C22H26O6	0	64.7	HMDB0030810	-	-	-	-	-	Phenylpropanoids and polyketides	Diarylheptanoids	Cyclic diarylheptanoids	0	64.7	-	-	1.7745	1.7503	0.0009003	0.004092	4.6451	4.6437	4.7788	4.9505	4.8222	4.318	3.408	3.9549	4.1243	3.8304
neg_4193	26-Deoxyactein	metab_11350	yes	-	neg	-	705.383	5.15115	M+FA-H	C37H56O10	0	39	HMDB0245709	-	-	-	-	-	Lipids and lipid-like molecules	Steroids and steroid derivatives	Cycloartanols and derivatives	0	39	-	-	1.1972	1.1605	0.0002939	0.001755	5.4816	5.48	5.5471	5.3751	5.4697	4.9431	5.0564	5.2744	5.1278	5.1131
neg_6570	Cyclopassifloic acid E	metab_13913	yes	-	neg	301540-74-9	589.32	4.94365	M+K-2H	C31H52O8	0	52.9	HMDB0036298	-	-	-	-	-	Lipids and lipid-like molecules	Steroids and steroid derivatives	Cycloartanols and derivatives	0	52.9	-	-	1.1519	1.1192	3.112e-06	6.941e-05	6.0847	6.0146	6.0743	6.0963	6.0964	5.7419	5.7324	5.8314	5.7753	5.6919
pos_6281	Actein	metab_5667	yes	-	pos	-	350.192	2.38105	M+H+Na	C37H56O11	0	71.6	HMDB0247977	-	-	-	-	-	Lipids and lipid-like molecules	Steroids and steroid derivatives	Cycloartanols and derivatives	0	71.6	-	-	1.7421	1.7248	7.12e-08	8.238e-06	5.3798	5.3544	5.4273	5.3445	5.3847	5.7067	5.7495	5.7769	5.7222	5.7191
neg_4455	Dihydrocytochalasin B	metab_11638	yes	-	neg	-	516.249	5.54792	M+Cl	C29H39NO5	0	72.9	HMDB0251302	-	-	-	-	-	Alkaloids and derivatives	Cytochalasans	Cytochalasins	0	72.9	-	-	1.6353	1.6215	4.608e-05	0.0004748	4.934	4.8274	4.8624	5.0164	4.9518	4.4554	4.051	4.1039	4.3714	4.2772
pos_1109	Delta-Valerolactone	metab_120	yes	C02240	pos	542-28-9	101.06	0.623083	M+H-H2O, M+H	C5H8O2	0	46.8	HMDB0250981	-	-	-	-	-	Organoheterocyclic compounds	Lactones	Delta valerolactones	0	46.8	-	-	1.0882	1.0691	5.692e-05	0.001346	7.4466	7.4585	7.3748	7.4432	7.4273	7.6068	7.5483	7.5764	7.6003	7.5515
pos_3378	Lovastatin	metab_2547	yes	C07074	pos	75330-75-5	422.29	5.72315	M+NH4	C24H36O5	0	76.4	HMDB0248085;PW_C008769;HMDB0014372;MJDBOTE0001458	-	-	-	-	-	Organoheterocyclic compounds	Lactones	Delta valerolactones	0	76.4	-	-	1.2528	1.2965	0.03134	0.1036	5.9736	6.1785	5.7652	5.9578	5.873	6.4932	6.1554	6.0853	6.2902	6.0762
pos_6985	Mycobactins	metab_6415	yes	-	pos	-	574.246	1.72718	M+H-H2O	C27H37N5O10	0	65.2	HMDB0254968	-	-	-	-	-	Organic acids and derivatives	Peptidomimetics	Depsipeptides	0	65.2	-	-	1.7427	1.7122	0.000122	0.002334	5.4688	5.5571	5.6524	5.6515	5.69	5.2541	5.2601	5.1656	5.3259	5.1156
neg_5781	10-Hydroxycarbazepine	metab_13063	yes	C07493	neg	29331-92-8	507.205	5.79587	2M-H	C15H14N2O2	0	72.5	HMDB0060676;PW_C040604	-	-	map07033;map00982	Drug Development;Metabolism	Chronology: Nervous system agents;Xenobiotics biodegradation and metabolism	Organoheterocyclic compounds	Benzazepines	Dibenzazepines	0	72.5	Anticonvulsants;Drug metabolism - cytochrome P450	Anticonvulsants;Drug metabolism - cytochrome P450	1.0558	1.0272	0.003934	0.01258	5.0008	5.0428	5.0207	4.9264	5.0411	4.6221	4.6986	4.7911	4.4327	4.885
pos_2360	Quetiapine	metab_1464	yes	C07397	pos	111974-69-7	401.202	2.73993	M+NH4	C21H25N3O2S	0	34.9	PW_C002368;HMDB0005021	-	-	-	-	-	Organoheterocyclic compounds	Benzothiazepines	Dibenzothiazepines	0	34.9	-	-	1.0228	1.0113	0.002315	0.01409	5.663	5.6695	5.6887	5.6663	5.6844	5.411	5.5848	5.5301	5.5175	5.5965
neg_8060	Monatepil	metab_15537	yes	-	neg	-	520.205	3.1601	M+FA-H	C28H30FN3OS	0	34.8	HMDB0254841	-	-	-	-	-	Organoheterocyclic compounds	Benzothiepins	Dibenzothiepins	0	34.8	-	-	1.8313	1.7997	2.064e-08	1.466e-06	5.8907	5.8331	5.8964	5.8689	5.8531	5.1204	5.069	5.0864	5.1549	4.9525
neg_6949	(E)-2-Hydroxy-N-desmethyldoxepin	metab_14326	yes	-	neg	-	302.118	4.34105	M+Na-2H	C18H19NO2	0	39.2	PW_C040605;HMDB0060699	-	-	-	-	-	Organoheterocyclic compounds	Benzoxepines	Dibenzoxepines	0	39.2	-	-	1.2295	1.294	0.04271	0.08094	4.009	3.2474	4.1723	4.3968	4.3787	3.2153	3.6925	3.4144	3.5808	3.5752
neg_179	Succinic Acid	metab_8741	yes	C00042	neg	110-15-6	117.018	1.4931	M-H, 2M-H, M-H2O-H	C4H6O4	80.6	0	LMFA01170043;PW_C000174;HMDB0000254;MJDBOTE0000409	Organic acids	Carboxylic acids	map01220;map00310;map01110;map01200;map00250;map02020;map00350;map00020;map00630;map00920;map00650;map04922;map04727;map01066;map01065;map01064;map01063;map01062;map01061;map01060;map01100;map01120;map04024;map00361;map00360;map00640;map00760;map00190;map00720;map00620;map05230;map01070	Metabolism;Metabolism;Metabolism;Metabolism;Metabolism;Environmental Information Processing;Metabolism;Metabolism;Metabolism;Metabolism;Metabolism;Organismal Systems;Organismal Systems;Metabolism;Metabolism;Metabolism;Metabolism;Metabolism;Metabolism;Metabolism;Metabolism;Metabolism;Environmental Information Processing;Metabolism;Metabolism;Metabolism;Metabolism;Metabolism;Metabolism;Metabolism;H…	Global and overview maps;Amino acid metabolism;Global and overview maps;Global and overview maps;Amino acid metabolism;Signal transduction;Amino acid metabolism;Carbohydrate metabolism;Carbohydrate metabolism;Energy metabolism;Carbohydrate metabolism;Endocrine system;Nervous system;Chemical structure transformation maps;Chemical structure transformation maps;Chemical structure transformation maps…	Organic acids and derivatives	Carboxylic acids and derivatives	Dicarboxylic acids and derivatives	80.6	0	Degradation of aromatic compounds;Lysine degradation;Biosynthesis of secondary metabolites;Carbon metabolism;Alanine, aspartate and glutamate metabolism;Two-component system;Tyrosine metabolism;Citrate cycle (TCA cycle);Glyoxylate and dicarboxylate metabolism;Sulfur metabolism;Butanoate metabolism;Glucagon signaling pathway;GABAergic synapse;Biosynthesis of alkaloids derived from terpenoid and po…	Degradation of aromatic compounds;Lysine degradation;Biosynthesis of secondary metabolites;Carbon metabolism;Alanine, aspartate and glutamate metabolism;Two-component system;Tyrosine metabolism;Citrate cycle (TCA cycle);Glyoxylate and dicarboxylate metabolism;Sulfur metabolism;Butanoate metabolism;Glucagon signaling pathway;GABAergic synapse;Biosynthesis of alkaloids derived from terpenoid and po…	1.6095	1.5639	0.03482	0.06856	8.1415	8.1848	8.1199	8.1812	8.172	6.4157	7.8478	7.8621	6.362	7.8029
neg_9341	Methylmalonic Acid	metab_16925	yes	C02170	neg	516-05-2	152.995	1.37445	M+Cl	C4H6O4	48.7	0	HMDB0000202;PW_C000130;LMFA01170118	-	-	map00240;map00640;map01100;map00280	Metabolism;Metabolism;Metabolism;Metabolism	Nucleotide metabolism;Carbohydrate metabolism;Global and overview maps;Amino acid metabolism	Organic acids and derivatives	Carboxylic acids and derivatives	Dicarboxylic acids and derivatives	48.7	0	Pyrimidine metabolism;Propanoate metabolism;Metabolic pathways;Valine, leucine and isoleucine degradation	Pyrimidine metabolism;Propanoate metabolism;Metabolic pathways;Valine, leucine and isoleucine degradation	1.2246	1.1934	2.394e-05	0.000296	5.0017	5.0082	4.9945	5.0159	5.029	4.5518	4.7536	4.7023	4.5372	4.6572
neg_7325	Benzenebutanesulfonic acid, 3-phenoxy-alpha-phosphono-, (alphaS)-	metab_14734	yes	-	neg	-	431.059	3.91818	M+FA-H	C16H19O7PS	0	38	HMDB0244709	-	-	-	-	-	Benzenoids	Benzene and substituted derivatives	Diphenylethers	0	38	-	-	1.0736	1.0867	0.0001167	0.0009227	4.6552	4.5186	4.5306	4.6603	4.6362	4.8738	4.9337	4.9762	4.8104	4.8747
neg_4039	Sobetirome	metab_11181	yes	C15618	neg	211110-63-3	365.113	4.79413	M+K-2H	C20H24O4	0	41.6	HMDB0258355	-	-	-	-	-	Benzenoids	Benzene and substituted derivatives	Diphenylmethanes	0	41.6	-	-	1.412	1.4148	0.0005662	0.00289	4.2289	4.1105	4.0738	4.3787	4.1759	3.9441	3.6027	3.4555	3.6587	3.6723
neg_8259	Bisphenol B	metab_15752	yes	C14225	neg	77-40-7	529.263	2.97525	2M+FA-H	C16H18O2	0	31.8	HMDB0245327	-	-	-	-	-	Benzenoids	Benzene and substituted derivatives	Diphenylmethanes	0	31.8	-	-	1.461	1.4222	1.03e-05	0.0001616	5.5567	5.4456	5.7057	5.5603	5.7233	5.1218	5.0838	5.0747	5.0361	5.06
pos_1218	Cetirizine	metab_239	yes	C07778	pos	83881-51-0	430.193	1.74277	M+H, M+ACN+H	C21H25ClN2O3	0	32.5	PW_C002375;HMDB0005032	-	-	-	-	-	Benzenoids	Benzene and substituted derivatives	Diphenylmethanes	0	32.5	-	-	1.3008	1.2748	6.217e-06	0.000245	6.4129	6.3489	6.4189	6.4118	6.3934	6.249	6.1797	6.2001	6.1791	6.1663
pos_2201	Triglycerol	metab_1293	yes	-	pos	-	223.117	2.4358	M+H-H2O	C9H20O7	0	35.5	HMDB0259216	-	-	-	-	-	Lipids and lipid-like molecules	Glycerolipids	Diradylglycerols	0	35.5	-	-	1.0498	1.0518	0.01402	0.05664	5.4038	5.1953	5.3603	5.3202	5.4467	5.1453	5.0873	5.2942	5.1679	5.1754
neg_1428	Cinnzeylanine	metab_8352	yes	-	neg	62203-47-8	471.221	2.25203	M+Cl, M+FA-H	C22H34O8	0	54.6	HMDB0036011	-	-	-	-	-	Lipids and lipid-like molecules	Prenol lipids	Diterpenoids	0	54.6	-	-	1.4172	1.3804	3.112e-07	1.244e-05	5.2464	5.2082	5.2928	5.2389	5.2872	4.7297	4.7719	4.8594	4.8112	4.7139
neg_3364	Gibberellin A51-catabolite	metab_10448	yes	C11854	neg	-	365.113	3.76898	M+Cl	C19H22O5	0	37.1	HMDB0304363;LMPR0104170011	-	-	map01110;map00904	Metabolism;Metabolism	Global and overview maps;Metabolism of terpenoids and polyketides	Lipids and lipid-like molecules	Prenol lipids	Diterpenoids	0	37.1	Biosynthesis of secondary metabolites;Diterpenoid biosynthesis	Biosynthesis of secondary metabolites;Diterpenoid biosynthesis	1.7429	1.7013	0.04998	0.0916	0.9588	1.1109	3.0105	3.0921	1.3915	0.6963	1.2334	0.6971	0.6846	0.6891
neg_6607	Mesaconitine	metab_13954	yes	C08698	neg	2752-64-9	676.295	4.86122	M+FA-H	C33H45NO11	0	54.8	HMDB0254473	-	-	-	-	-	Lipids and lipid-like molecules	Prenol lipids	Diterpenoids	0	54.8	-	-	3.3032	3.2125	0.0001206	0.0009471	2.6921	1.2639	3.5531	3.1567	3.1218	0.0001	0.0001	0.0095	0.0001	0.0001
neg_7559	7-Hydroxymitragynine	metab_14990	yes	-	neg	-	887.449	3.65033	2M+Hac-H	C23H30N2O5	0	76.3	HMDB0247263	-	-	-	-	-	Lipids and lipid-like molecules	Prenol lipids	Diterpenoids	0	76.3	-	-	1.6366	1.6263	0.0009457	0.004231	5.0644	4.9326	4.8125	4.9157	4.8175	4.1622	3.7103	4.3606	4.4728	4.2823
pos_1767	Phorbol-12,13-dibutyrate	metab_826	yes	C03634	pos	37558-16-0	543.24	1.7661	M+K	C28H40O8	0	36.5	HMDB0246702	-	-	-	-	-	Lipids and lipid-like molecules	Prenol lipids	Diterpenoids	0	36.5	-	-	1.0166	0.9995	3.259e-05	0.0008757	6.6485	6.6346	6.6624	6.6478	6.6406	6.5468	6.5081	6.4918	6.5635	6.4961
pos_50	Plastoquinone 3	metab_4324	yes	-	pos	1168-52-1	323.236	5.67623	M+H-H2O, M+ACN+H, M+H, M+H-2H2O	C23H32O2	0	32.4	HMDB0033786	-	-	-	-	-	Lipids and lipid-like molecules	Prenol lipids	Diterpenoids	0	32.4	-	-	1.5507	1.5543	0.009832	0.04252	5.4629	5.6412	5.3167	5.4864	5.4192	6.1099	5.8599	5.6789	5.9409	5.5705
pos_5936	Crocin 4	metab_5289	yes	C00744	pos	55750-86-2	537.266	2.87258	M+CH3OH+H	C27H36O9	0	51.2	HMDB0039122	-	-	map01100;map00522;map01110	Metabolism;Metabolism;Metabolism	Global and overview maps;Metabolism of terpenoids and polyketides;Global and overview maps	Lipids and lipid-like molecules	Prenol lipids	Diterpenoids	0	51.2	Metabolic pathways;Biosynthesis of 12-, 14- and 16-membered macrolides;Biosynthesis of secondary metabolites	Metabolic pathways;Biosynthesis of 12-, 14- and 16-membered macrolides;Biosynthesis of secondary metabolites	1.0296	1.0129	0.0004953	0.004298	5.969	5.9615	5.9789	5.9422	5.8938	5.7381	5.8299	5.8506	5.8264	5.8108
pos_6414	Gibberellin A12	metab_5813	yes	C11857	pos	1164-45-0	355.186	2.21723	M+Na	C20H28O4	0	50.4	LMPR0104170014;HMDB0301912;HMDB0303453	-	-	map01100;map00904;map01110	Metabolism;Metabolism;Metabolism	Global and overview maps;Metabolism of terpenoids and polyketides;Global and overview maps	Lipids and lipid-like molecules	Prenol lipids	Diterpenoids	0	50.4	Metabolic pathways;Diterpenoid biosynthesis;Biosynthesis of secondary metabolites	Metabolic pathways;Diterpenoid biosynthesis;Biosynthesis of secondary metabolites	1.7336	1.7118	0.0003839	0.004298	5.8263	5.8907	5.6831	5.8482	5.6557	6.254	6.0816	6.1356	6.3097	6.0726
neg_2858	Leukotriene D4	metab_9893	yes	C05951	neg	73836-78-9	541.262	3.1601	M+FA-H	C25H40N2O6S	0	66.9	HMDB0244369;LMFA03020006;PW_C001775;HMDB0003080	Lipids	Eicosanoids	map00590;map01100;map04080;map04664;map05310	Metabolism;Metabolism;Environmental Information Processing;Organismal Systems;Human Diseases	Lipid metabolism;Global and overview maps;Signaling molecules and interaction;Immune system;Immune disease	Lipids and lipid-like molecules	Fatty Acyls	Eicosanoids	0	66.9	Arachidonic acid metabolism;Metabolic pathways;Neuroactive ligand-receptor interaction;Fc epsilon RI signaling pathway;Asthma	Arachidonic acid metabolism;Metabolic pathways;Neuroactive ligand-receptor interaction;Fc epsilon RI signaling pathway;Asthma	1.3664	1.3355	2.344e-06	5.711e-05	5.261	5.3169	5.3104	5.3316	5.3154	4.822	4.7686	4.9852	4.8514	4.8689
neg_3120	N-Acetyl-leukotriene E4	metab_10183	yes	C11361	neg	80115-95-3	526.252	3.4738	M+FA-H	C25H39NO6S	0	62.4	HMDB0005084;LMFA03020008;LMFA03020079;LMFA03020078	-	-	-	-	-	Lipids and lipid-like molecules	Fatty Acyls	Eicosanoids	0	62.4	-	-	1.6505	1.6231	1.364e-07	6.348e-06	6.1817	6.1703	6.1302	6.1735	6.1806	5.3886	5.5344	5.5287	5.6138	5.5377
neg_4052	Epothilone C	metab_11196	yes	C15694	neg	-	522.257	4.82993	M+FA-H	C26H39NO5S	0	78.6	HMDB0251875	-	-	-	-	-	Phenylpropanoids and polyketides	Macrolides and analogues	Epothilones and analogues	0	78.6	-	-	2.916	2.8695	1.423e-16	1.391e-12	5	5.0398	5.008	5.0324	5.029	3.0306	3.0398	3.0316	3.016	3.0216
neg_6855	4,17-Dimethyltrilostane	metab_14226	yes	-	neg	-	378.203	4.46122	M+Na-2H	C22H31NO3	0	31.4	HMDB0242688	-	-	-	-	-	Lipids and lipid-like molecules	Steroids and steroid derivatives	Estrane steroids	0	31.4	-	-	1.0232	0.9955	7.313e-06	0.0001304	4.9891	5.0639	4.9541	5.005	4.968	5.2992	5.2414	5.2768	5.2136	5.2239
neg_7403	Norerythromycin	metab_14820	yes	-	neg	-	740.395	3.83302	M+Cl	C35H63NO13	0	58	HMDB0061026	-	-	-	-	-	Lipids and lipid-like molecules	Steroids and steroid derivatives	Estrane steroids	0	58	-	-	1.2955	1.4567	0.02952	0.0597	3.1482	3.2686	3.9339	3.1157	3.9001	3.7763	4.4059	4.0047	3.8749	4.1226
neg_7996	Quinestrol	metab_15465	yes	C07619	neg	152-43-2	401.187	3.22412	M+K-2H	C25H32O2	0	34.6	HMDB0015579;LMST02010037	-	-	-	-	-	Lipids and lipid-like molecules	Steroids and steroid derivatives	Estrane steroids	0	34.6	-	-	3.1966	3.1523	0.000109	0.0008849	5.0812	4.9149	5.114	5.0889	5.1021	1.824	2.6872	2.1456	3.8122	1.9252
pos_6301	(8R,9S,13S,14S,17S)-17-Benzyl-13-methyl-7,8,9,11,12,14,15,16-octahydro-6H-cyclopenta[a]phenanthrene-3,17-diol	metab_5690	yes	-	pos	-	401.185	2.35768	M+K	C25H30O2	0	31.1	HMDB0260177	-	-	-	-	-	Lipids and lipid-like molecules	Steroids and steroid derivatives	Estrane steroids	0	31.1	-	-	1.1384	1.1192	0.0003175	0.004298	5.5198	5.6083	5.5513	5.5215	5.5042	5.7266	5.764	5.6629	5.7259	5.6568
pos_6143	Cadabicine	metab_5517	yes	-	pos	99964-83-7	458.207	2.5603	M+Na	C25H29N3O4	0	75.1	HMDB0033451	-	-	-	-	-	Organic oxygen compounds	Organooxygen compounds	Ethers	0	75.1	-	-	1.3077	1.2816	0.0003103	0.004298	5.3991	5.3933	5.3183	5.3826	5.3725	5.4998	5.6745	5.5637	5.6596	5.5576
neg_2228	Undeca-3,6,9-trienedioylcarnitine	metab_9203	yes	-	neg	-	374.157	2.3	M+Na-2H	C18H27NO6	0	45.6	HMDB0241205	-	-	-	-	-	Lipids and lipid-like molecules	Fatty Acyls	Fatty acid esters	0	45.6	-	-	1.3136	1.3129	0.003917	0.01254	5.4143	5.1403	5.7868	5.5664	5.7453	5.0918	4.9473	5.1448	4.9798	5.0148
neg_2545	(5E)-3-Hydroxyhept-5-enoylcarnitine	metab_9549	yes	-	neg	-	322.141	2.77452	M+Cl	C14H25NO5	0	41.1	HMDB0241686	-	-	-	-	-	Lipids and lipid-like molecules	Fatty Acyls	Fatty acid esters	0	41.1	-	-	1.9075	1.8574	2.025e-06	5.2e-05	5.6305	5.6651	5.8807	5.6501	5.6611	4.7621	4.9535	4.9619	4.7064	4.7319
neg_2885	3-Hydroxyhept-4-enoylcarnitine	metab_9923	yes	-	neg	-	322.141	3.20012	M+Cl	C14H25NO5	0	34.1	HMDB0241685	-	-	-	-	-	Lipids and lipid-like molecules	Fatty Acyls	Fatty acid esters	0	34.1	-	-	1.4321	1.3878	0.0002329	0.001487	4.8053	4.4641	4.8739	4.7435	4.7737	4.28	4.1057	4.2528	4.3045	4.0971
neg_3318	Dodec-6-enedioylcarnitine	metab_10397	yes	-	neg	-	408.177	3.705	M+K-2H	C19H33NO6	0	39.3	HMDB0241230	-	-	-	-	-	Lipids and lipid-like molecules	Fatty Acyls	Fatty acid esters	0	39.3	-	-	1.4548	1.4558	0.006024	0.01722	5.4181	4.5928	5.4547	5.3946	5.4345	4.5855	4.6431	4.666	4.6358	4.6645
neg_3682	Dodec-9-enedioylcarnitine	metab_10796	yes	-	neg	-	408.177	4.19705	M+K-2H	C19H33NO6	0	35.3	HMDB0241226	-	-	-	-	-	Lipids and lipid-like molecules	Fatty Acyls	Fatty acid esters	0	35.3	-	-	1.8784	1.9386	0.01319	0.03117	4.3621	3.2891	5.1016	3.9014	5.121	3.2398	3.2491	3.2409	3.2252	3.2308
neg_3745	Furfuryl isovalerate	metab_10862	yes	-	neg	13678-60-9	203.068	4.30105	M+Na-2H	C10H14O3	0	48.8	HMDB0039874;LMFA07010890	-	-	-	-	-	Lipids and lipid-like molecules	Fatty Acyls	Fatty acid esters	0	48.8	-	-	1.1579	1.2018	0.01294	0.03067	4.588	4.6737	4.4816	4.8016	4.6939	4.6559	3.9636	4.1517	4.3017	4.0562
neg_3831	(2E)-4-Hydroxy-3-methylpent-2-enedioylcarnitine	metab_10955	yes	-	neg	-	302.125	4.41307	M-H	C13H21NO7	0	34.6	HMDB0241661	-	-	-	-	-	Lipids and lipid-like molecules	Fatty Acyls	Fatty acid esters	0	34.6	-	-	1.1835	1.2002	0.01414	0.03301	4.6542	4.1022	4.7642	4.6971	4.7274	4.0992	3.9742	4.2433	4.0755	4.3595
neg_3940	4-Ethoxy-4-oxobutanoylcarnitine	metab_11073	yes	-	neg	-	288.145	4.60443	M-H	C13H23NO6	0	39.5	HMDB0241811	-	-	-	-	-	Lipids and lipid-like molecules	Fatty Acyls	Fatty acid esters	0	39.5	-	-	1.4658	1.4526	8.554e-09	7.024e-07	4.908	4.9473	4.8943	4.9356	4.9003	4.3898	4.375	4.396	4.4784	4.4122
neg_4129	Propenoylcarnitine	metab_11280	yes	-	neg	-	214.108	5.01013	M-H	C10H17NO4	0	30.7	HMDB0013124;LMFA07070104	-	-	-	-	-	Lipids and lipid-like molecules	Fatty Acyls	Fatty acid esters	0	30.7	-	-	1.4862	1.5018	0.005548	0.01613	4.1091	3.439	4.2041	4.1043	4.3736	3.3622	3.4657	3.4458	3.1627	3.5512
neg_561	3-Hydroxynona-4,6-dienoylcarnitine	metab_12878	yes	-	neg	-	350.136	2.90288	M+Cl, M+K-2H	C16H27NO5	0	38.7	HMDB0241771	-	-	-	-	-	Lipids and lipid-like molecules	Fatty Acyls	Fatty acid esters	0	38.7	-	-	1.2732	1.3258	0.01976	0.04324	4.8045	4.0419	4.9725	4.9286	4.9675	4.2245	4.1798	4.3365	4.1368	4.2093
neg_5949	(2E)-Undec-2-enedioylcarnitine	metab_13240	yes	-	neg	-	356.208	5.6762	M-H	C18H31NO6	0	37.1	HMDB0241174	-	-	-	-	-	Lipids and lipid-like molecules	Fatty Acyls	Fatty acid esters	0	37.1	-	-	1.3541	1.3236	0.001277	0.005314	5.5114	5.0153	5.484	5.4867	5.5415	4.8862	4.863	4.9641	4.9869	4.866
neg_6541	Fumarycarnitine	metab_13881	yes	-	neg	-	258.098	5.01682	M-H	C11H17NO6	0	42.2	LMFA07070064;HMDB0013134	-	-	-	-	-	Lipids and lipid-like molecules	Fatty Acyls	Fatty acid esters	0	42.2	-	-	1.7122	1.7461	0.01121	0.0275	5.1096	3.8549	5.2564	5.1357	5.3186	3.9221	3.9797	4.11	4.05	4.103
neg_8199	(5E,7E)-Undeca-2,5,7-trienedioylcarnitine	metab_15688	yes	-	neg	-	374.157	3.03972	M+Na-2H	C18H27NO6	0	35.7	HMDB0241202	-	-	-	-	-	Lipids and lipid-like molecules	Fatty Acyls	Fatty acid esters	0	35.7	-	-	1.076	1.1226	0.01531	0.0351	5.061	4.7569	5.3927	5.1072	5.4115	4.7643	4.7662	4.7962	4.7639	4.782
neg_8713	Dodeca-5,7,9-trienedioylcarnitine	metab_16250	yes	-	neg	-	388.173	2.42802	M+Na-2H	C19H29NO6	0	38.5	HMDB0241283	-	-	-	-	-	Lipids and lipid-like molecules	Fatty Acyls	Fatty acid esters	0	38.5	-	-	1.1719	1.1949	0.007509	0.02015	5.4375	5.2025	5.7982	5.467	5.7925	5.1264	5.1443	5.2042	5.0877	5.0664
pos_3462	Methyl 4,7,10,13,16-docosapentaenoate	metab_2639	yes	-	pos	-	309.257	5.84807	M+H-2H2O	C23H36O2	0	47	HMDB0254570	-	-	-	-	-	Lipids and lipid-like molecules	Fatty Acyls	Fatty acid esters	0	47	-	-	2.5408	2.5003	0.00018	0.003173	4.5682	4.9956	4.5591	4.7464	4.3844	5.5399	5.6082	5.3172	5.586	5.2805
pos_4762	(10Z)-12-Hydroxyhexadecenoylcarnitine	metab_4065	yes	-	pos	-	414.32	5.65275	M+H	C23H43NO5	0	58.8	HMDB0241477	-	-	-	-	-	Lipids and lipid-like molecules	Fatty Acyls	Fatty acid esters	0	58.8	-	-	1.1113	1.1026	0.005868	0.0289	5.7327	5.66	5.696	5.6655	5.8153	6.0325	5.8122	5.8448	5.9401	5.8536
neg_112	Leucinic Acid	metab_8013	yes	-	neg	498-36-2	177.076	4.33305	M+FA-H, 2M-H, M-H2O-H	C6H12O3	51.9	0	HMDB0000665;LMFA01050381	-	-	-	-	-	Lipids and lipid-like molecules	Fatty Acyls	Fatty acids and conjugates	51.9	0	-	-	2.6177	2.5838	1.438e-07	6.625e-06	5.1982	5.0959	5.2003	5.2107	5.2022	3.8283	3.4732	3.2654	3.5247	3.6491
neg_2570	D-Dethiobiotin	metab_9576	yes	C01909	neg	533-48-2	213.124	2.81438	M-H	C10H18N2O3	33	0	HMDB0003581	-	-	map01100;map00780;map01240	Metabolism;Metabolism;Metabolism	Global and overview maps;Metabolism of cofactors and vitamins;Global and overview maps	Lipids and lipid-like molecules	Fatty Acyls	Fatty acids and conjugates	33	0	Metabolic pathways;Biotin metabolism;Biosynthesis of cofactors	Metabolic pathways;Biotin metabolism;Biosynthesis of cofactors	1.5479	1.5074	1.553e-06	4.191e-05	4.3289	4.496	4.3074	4.4506	4.2621	4.9444	4.9117	4.9573	4.9852	4.9346
neg_574	2-Hydroxypentanoic Acid	metab_13020	yes	-	neg	617-31-2	117.055	2.97525	M-H, M+FA-H	C5H10O3	56	0	HMDB0001863	-	-	-	-	-	Lipids and lipid-like molecules	Fatty Acyls	Fatty acids and conjugates	56	0	-	-	2.2658	2.2253	1.37e-09	1.773e-07	6.5022	6.4646	6.4736	6.5193	6.4953	5.2607	5.2164	5.2784	5.2298	5.4286
neg_7754	2-Isopropylmalic Acid	metab_15201	yes	C02504	neg	49601-06-1	175.061	3.4738	M-H	C7H12O5	64.9	0	HMDB0000402	-	-	map01100;map01110;map00290;map01210;map01230;map00620	Metabolism;Metabolism;Metabolism;Metabolism;Metabolism;Metabolism	Global and overview maps;Global and overview maps;Amino acid metabolism;Global and overview maps;Global and overview maps;Carbohydrate metabolism	Lipids and lipid-like molecules	Fatty Acyls	Fatty acids and conjugates	64.9	0	Metabolic pathways;Biosynthesis of secondary metabolites;Valine, leucine and isoleucine biosynthesis;2-Oxocarboxylic acid metabolism;Biosynthesis of amino acids;Pyruvate metabolism	Metabolic pathways;Biosynthesis of secondary metabolites;Valine, leucine and isoleucine biosynthesis;2-Oxocarboxylic acid metabolism;Biosynthesis of amino acids;Pyruvate metabolism	1.5681	1.5466	4.745e-08	2.898e-06	5.2388	5.2464	5.2075	5.2909	5.2675	4.6929	4.6246	4.6922	4.7392	4.5938
neg_8228	3-(1-Hydroxymethyl-1-propenyl)pentanedioic acid	metab_15720	yes	-	neg	-	463.183	3.00725	2M+Hac-H	C9H14O5	0	33.5	HMDB0033092	-	-	-	-	-	Lipids and lipid-like molecules	Fatty Acyls	Fatty acids and conjugates	0	33.5	-	-	1.4839	1.4427	7.961e-07	2.509e-05	5.752	5.7103	5.7969	5.7834	5.8456	5.1814	5.2697	5.3438	5.1812	5.2797
neg_9160	3-Hydroxy-3-methylglutarate	metab_16735	yes	C03761	neg	503-49-1	161.045	1.87547	M-H	C6H10O5	77.6	0	HMDB0000355	-	-	-	-	-	Lipids and lipid-like molecules	Fatty Acyls	Fatty acids and conjugates	77.6	0	-	-	1.1357	1.1118	4.911e-07	1.732e-05	6.0177	5.9862	6.0185	5.9301	6.0508	5.7048	5.695	5.6987	5.6896	5.6693
neg_4689	Dodecanedioic Acid	metab_17607	yes	C02678	neg	693-23-2;6402-36-4	229.144	5.7322	M-H	C12H22O4	90.4	0	HMDB0000933;LMFA01170009;HMDB0000623;MJDBOTE0000650	-	-	-	-	-	Lipids and lipid-like molecules	Fatty Acyls	Fatty acids and conjugates	90.4	0	-	-	1.4825	1.4632	2.288e-10	4.14e-08	5.434	5.4055	5.4072	5.4344	5.4303	5.9188	5.9685	5.9481	5.9053	5.9549
pos_2189	6-Acetamidohexanoic acid	metab_1279	yes	-	pos	-	174.112	2.42017	M+H	C8H15NO3	0	34.6	HMDB0247031	-	-	-	-	-	Lipids and lipid-like molecules	Fatty Acyls	Fatty acids and conjugates	0	34.6	-	-	1.6635	1.6405	0.0005794	0.004761	4.9159	4.7692	4.6711	4.7299	4.7793	5.2921	4.9835	5.1787	5.1674	5.0658
pos_2356	Undecylenic acid	metab_1459	yes	C13910	pos	112-38-9	229.118	2.73223	M+2Na-H	C11H20O2	0	35.9	HMDB0033724;LMFA01030036	-	-	-	-	-	Lipids and lipid-like molecules	Fatty Acyls	Fatty acids and conjugates	0	35.9	-	-	1.0519	1.027	0.00652	0.03124	5.1017	4.9294	5.0795	5.1188	5.0996	4.9582	4.9005	4.9168	4.9467	4.8059
pos_3479	13,16,19-Docosatrienoic acid	metab_2656	yes	C16534	pos	28845-86-5	357.278	5.89557	M+Na	C22H38O2	0	82.4	LMFA01030407;HMDB0002823;HMDB0244522	-	-	-	-	-	Lipids and lipid-like molecules	Fatty Acyls	Fatty acids and conjugates	0	82.4	-	-	1.0162	0.9945	0.003305	0.01873	5.715	5.8073	5.7691	5.7324	5.6879	5.7984	5.9579	5.8602	5.933	5.8841
pos_4673	Pentadecanoic acid	metab_3966	yes	C16537	pos	1002-84-2	260.258	5.73097	M+NH4	C15H30O2	0	31.4	LMFA01010015;HMDB0000826	-	-	-	-	-	Lipids and lipid-like molecules	Fatty Acyls	Fatty acids and conjugates	0	31.4	-	-	1.5534	1.5267	5.452e-05	0.001304	4.8195	4.7762	4.8322	4.9154	4.819	4.6221	4.5177	4.5324	4.5716	4.4373
pos_7497	4-Trimethylammoniobutanoic Acid	metab_6945	yes	C01181	pos	407-64-7	146.117	0.599817	M+H	C7H15NO2	53.2	0	PW_C000899;HMDB0001161	-	-	map01100;map00310;map02010	Metabolism;Metabolism;Environmental Information Processing	Global and overview maps;Amino acid metabolism;Membrane transport	Lipids and lipid-like molecules	Fatty Acyls	Fatty acids and conjugates	53.2	0	Metabolic pathways;Lysine degradation;ABC transporters	Metabolic pathways;Lysine degradation;ABC transporters	1.1122	1.097	8.766e-05	0.001883	5.891	5.9213	5.9157	5.9253	5.8821	6.1024	6.0304	6.0313	6.1183	6.0309
pos_856	(12R)-12-Hydroxyoctadec-9-enoic acid	metab_7328	yes	-	pos	-	299.258	5.84807	M+H-2H2O, M+H	C18H34O3	0	51.7	HMDB0242322	-	-	-	-	-	Lipids and lipid-like molecules	Fatty Acyls	Fatty acids and conjugates	0	51.7	-	-	1.3078	1.2986	0.02375	0.08379	5.2844	5.3119	5.241	5.275	5.2381	5.5555	5.4434	5.4935	5.9471	5.353
neg_2397	7,8-Dihydrovomifoliol 9-[apiosyl-(1->6)-glucoside]	metab_9388	yes	-	neg	177261-70-0	519.242	2.55692	M-H	C24H40O12	0	61.3	HMDB0029771	-	-	-	-	-	Lipids and lipid-like molecules	Fatty Acyls	Fatty acyl glycosides	0	61.3	-	-	1.5908	1.5487	1.992e-07	8.73e-06	5.4255	5.3313	5.4484	5.4444	5.4137	4.7921	4.7503	4.9196	4.8339	4.7719
neg_3639	Ethyl 3-hydroxyoctanoate O-[glucosyl-(1->6)-glucoside]	metab_10748	yes	-	neg	-	493.23	4.14103	M-H2O-H	C22H40O13	0	35.6	HMDB0038738	-	-	-	-	-	Lipids and lipid-like molecules	Fatty Acyls	Fatty acyl glycosides	0	35.6	-	-	1.7643	1.8116	0.01284	0.03051	5.0868	3.8515	5.4071	4.888	5.4383	3.7951	3.8254	4.2413	4.1378	3.8236
neg_3999	1-Octen-3-yl primeveroside	metab_11135	yes	-	neg	209863-01-4	421.209	4.72515	M-H	C19H34O10	0	78.2	LMFA13010064;HMDB0032960	-	-	-	-	-	Lipids and lipid-like molecules	Fatty Acyls	Fatty acyl glycosides	0	78.2	-	-	1.3632	1.4088	0.0178	0.03976	5.2136	5.0478	5.9818	5.2252	5.9837	4.7932	4.9104	4.9419	4.9004	4.8586
neg_6270	Dihydrozeatin-9-N-glucoside-O-glucoside	metab_13584	yes	-	neg	619326-04-4	580.205	5.46455	M+Cl	C22H35N5O11	0	66.4	HMDB0012212	-	-	-	-	-	Lipids and lipid-like molecules	Fatty Acyls	Fatty acyl glycosides	0	66.4	-	-	1.7811	1.8003	0.009631	0.02439	5.9648	4.7732	5.9951	5.928	5.9971	4.7725	4.671	5.1533	4.2696	4.9961
neg_6594	(3S,5R,6S,7E,9x)-7-Megastigmene-3,6,9-triol 9-glucoside	metab_13939	yes	-	neg	-	435.224	4.8849	M+FA-H	C19H34O8	0	68.4	LMFA13010057;HMDB0041176	-	-	-	-	-	Lipids and lipid-like molecules	Fatty Acyls	Fatty acyl glycosides	0	68.4	-	-	1.6488	1.6171	0.0004009	0.002245	4.7295	4.2515	4.8883	4.6025	4.898	3.864	3.98	4.0015	3.956	4.0227
neg_8860	Cis-Zeatin O-glucoside	metab_16413	yes	C15546	neg	71866-93-8	426.163	2.26002	M+FA-H	C16H23N5O6	0	60.1	HMDB0012203	-	-	map01110;map00908	Metabolism;Metabolism	Global and overview maps;Metabolism of terpenoids and polyketides	Lipids and lipid-like molecules	Fatty Acyls	Fatty acyl glycosides	0	60.1	Biosynthesis of secondary metabolites;Zeatin biosynthesis	Biosynthesis of secondary metabolites;Zeatin biosynthesis	1.2231	1.194	1.445e-06	3.956e-05	5.3589	5.3595	5.4375	5.3413	5.3506	5.0234	5.0623	5.05	4.9726	4.9449
pos_1923	(3b,9R)-5-Megastigmene-3,9-diol 9-[apiosyl-(1->6)-glucoside]	metab_993	yes	-	pos	347852-04-4	570.287	1.95283	M+ACN+Na	C24H42O11	0	46.8	LMFA13010056;HMDB0038327	-	-	-	-	-	Lipids and lipid-like molecules	Fatty Acyls	Fatty acyl glycosides	0	46.8	-	-	1.5092	1.4755	0.0006279	0.005052	5.7826	5.6519	5.7553	5.8063	5.7214	5.5351	5.28	5.414	5.5197	5.4964
pos_2334	Eriojaposide B	metab_1435	yes	C17889	pos	351412-97-0	558.288	2.67748	M+ACN+H	C25H40O11	0	48.3	HMDB0038029	-	-	-	-	-	Lipids and lipid-like molecules	Fatty Acyls	Fatty acyl glycosides	0	48.3	-	-	2.5554	2.5111	0.002036	0.01277	4.9052	4.5192	4.8569	4.8779	5.0439	4.3286	3.8124	4.1384	3.3036	4.1338
pos_494	2-O-alpha-D-Glucopyranosyl-O-beta-D-galactopyranosylhydroxylysine	metab_4258	yes	-	pos	32448-35-4	519.241	2.17037	M+H-2H2O, M+CH3OH+H	C18H34N2O13	0	68.5	HMDB0246739;HMDB0000585	-	-	-	-	-	Lipids and lipid-like molecules	Fatty Acyls	Fatty acyl glycosides	0	68.5	-	-	1.5111	1.535	0.03746	0.118	5.2677	4.9342	5.7189	5.6766	5.6903	4.9584	5.1327	4.9938	5.1541	5.0613
pos_5087	7,8-Dihydro-3b,6a-dihydroxy-alpha-ionol 9-[apiosyl-(1->6)-glucoside]	metab_4416	yes	-	pos	177261-73-3	564.302	4.87383	M+ACN+H	C24H42O12	0	43.8	HMDB0041579	-	-	-	-	-	Lipids and lipid-like molecules	Fatty Acyls	Fatty acyl glycosides	0	43.8	-	-	2.5824	2.5347	0.0001894	0.003313	5.5806	5.0831	5.7436	5.653	5.7189	4.69	4.5695	4.8374	4.7477	4.7398
pos_5736	Butyl (S)-3-hydroxybutyrate [arabinosyl-(1->6)-glucoside]	metab_5080	yes	-	pos	-	487.239	3.2625	M+CH3OH+H	C19H34O12	0	46.7	HMDB0039214	-	-	-	-	-	Lipids and lipid-like molecules	Fatty Acyls	Fatty acyl glycosides	0	46.7	-	-	1.9637	1.9314	9.361e-05	0.001966	5.5119	5.5135	5.5156	5.5305	5.6652	5.0807	4.9229	5.2181	4.9317	5.1698
pos_6202	(S)-Nerolidol 3-O-[a-L-rhamnopyranosyl-(1->2)-b-D-glucopyranoside]	metab_5581	yes	-	pos	130466-30-7	553.297	2.46702	M+Na	C27H46O10	0	43.6	HMDB0040844	-	-	-	-	-	Lipids and lipid-like molecules	Fatty Acyls	Fatty acyl glycosides	0	43.6	-	-	1.6521	1.63	0.0006442	0.005143	5.9286	5.9793	6.0318	5.9193	5.9781	5.7342	5.7221	5.5944	5.6208	5.3858
pos_2251	Neuromedin N (1-4)	metab_1345	yes	-	pos	-	527.281	2.52915	M+Na	C26H40N4O6	0	45.9	HMDB0013021	-	-	-	-	-	Lipids and lipid-like molecules	Fatty Acyls	Fatty acyl thioesters	0	45.9	-	-	1.3992	1.3761	0.003795	0.02097	5.58	5.4278	5.4375	5.5604	5.6021	5.221	5.3031	5.0785	5.4265	5.1948
pos_7074	S-(2-Methylbutanoyl)-dihydrolipoamide	metab_6510	yes	C05118	pos	-	274.13	1.61812	M+H-H2O	C13H25NO2S2	0	48.7	PW_C002980;HMDB0006869	-	-	-	-	-	Lipids and lipid-like molecules	Fatty Acyls	Fatty acyl thioesters	0	48.7	-	-	1.574	1.556	0.01244	0.05143	3.5023	3.555	3.5683	3.3353	3.2924	3.1595	2.6923	3.0783	3.2968	3.1485
pos_2129	S-(3-Methylbutanoyl)-dihydrolipoamide-E	metab_7515	yes	C05119	pos	-	600.298	2.31075	2M+NH4	C13H25NO2S2	0	30.5	HMDB0006867;PW_C002978	-	-	-	-	-	Lipids and lipid-like molecules	Fatty Acyls	Fatty acyl thioesters	0	30.5	-	-	2.4784	2.4438	7.054e-10	2.749e-07	5.8922	5.9192	5.9001	5.886	5.8618	5.1519	5.1506	5.1371	5.2015	5.2396
neg_3467	Oxethazaine	metab_10562	yes	C12552	neg	183195-99-5;126-27-2	502.288	3.90218	M+Cl	C28H41N3O3	0	38.7	HMDB0031171;HMDB0255980	-	-	-	-	-	Lipids and lipid-like molecules	Fatty Acyls	Fatty alcohols	0	38.7	-	-	1.0579	1.0264	0.004291	0.01339	4.7194	4.5312	4.7607	4.6955	4.7672	4.2401	4.2073	4.5575	4.4935	4.3829
neg_4780	Methyl-[12]-gingerdiol	metab_11982	yes	-	neg	-	415.281	5.893	M+Na-2H	C24H42O4	0	48.2	HMDB0303110	-	-	-	-	-	Lipids and lipid-like molecules	Fatty Acyls	Fatty alcohols	0	48.2	-	-	1.5966	1.5624	8.353e-09	6.917e-07	5.6173	5.6071	5.6853	5.6159	5.6294	5.0171	5.0196	5.0827	5.065	4.968
pos_4510	Panaxynol	metab_7511	yes	C08450	pos	81203-57-8;21852-80-2	227.179	5.84025	M+H-H2O	C17H24O	0	40.5	HMDB0039588;LMFA05000019;HMDB0244256;LMFA05000689	-	-	-	-	-	Lipids and lipid-like molecules	Fatty Acyls	Fatty alcohols	0	40.5	-	-	1.0096	0.9921	0.0003237	0.004298	5.0878	5.0394	5.0462	5.0626	5.0185	4.9023	4.8765	4.9335	4.9041	4.9844
pos_4589	N-Isobutyl-2,4,8-decatrienamide	metab_3872	yes	-	pos	52657-13-3	443.363	5.77788	2M+H	C14H23NO	0	53.1	HMDB0030188	-	-	-	-	-	Lipids and lipid-like molecules	Fatty Acyls	Fatty amides	0	53.1	-	-	3.4237	3.3697	5.088e-05	0.001258	5.0406	4.623	4.9747	4.9309	4.6922	3.2018	4.0609	3.2133	3.2178	3.311
neg_8519	Flavan-3-ol	metab_16039	yes	C15598	neg	-	497.2	2.6694	2M+FA-H	C15H14O2	0	52.3	HMDB0252291	-	-	-	-	-	Phenylpropanoids and polyketides	Flavonoids	Flavans	0	52.3	-	-	1.9754	1.9372	5.464e-11	1.529e-08	5.7409	5.7294	5.7581	5.7556	5.7275	4.8049	4.7912	4.8994	4.8226	4.82
neg_3073	Cadabicine methyl ether	metab_10131	yes	-	neg	-	484.205	3.41712	M+Cl	C26H31N3O4	0	41.9	HMDB0039857	-	-	-	-	-	Phenylpropanoids and polyketides	Flavonoids	Flavonoid glycosides	0	41.9	-	-	1.58	1.5369	0.000125	0.0009726	4.919	4.612	5.0265	5.0564	5.1121	4.3772	4.3272	4.2941	4.3219	4.2414
neg_4513	Evobioside	metab_11702	yes	-	neg	79435-42-0	703.331	5.58785	M+Na-2H	C35H54O13	0	80.3	HMDB0038020	-	-	-	-	-	Organoheterocyclic compounds	Furans	Furoic acid and derivatives	0	80.3	-	-	1.5132	1.4684	0.0019	0.007123	4.1484	4.0993	3.9657	4.2365	4.0866	3.5514	3.5518	3.9013	3.2014	3.207
neg_5723	Nuatigenin	metab_13002	yes	C04715	neg	6811-35-4	429.297	5.90957	M-H	C27H42O4	0	53.6	LMST01090001;HMDB0301755	Steroids	27-Carbon atoms	-	-	-	Lipids and lipid-like molecules	Steroids and steroid derivatives	Furospirostanes and derivatives	0	53.6	-	-	1.2857	1.2655	7.132e-08	3.915e-06	5.3372	5.4057	5.4278	5.3986	5.4085	5.034	4.9793	5.0146	5.0283	4.9598
neg_5614	4-(4-Methylcyclohexyl)-4-oxobutanoic acid	metab_12883	yes	-	neg	-	243.123	6.08675	M+FA-H	C11H18O3	0	35.2	HMDB0253742	-	-	-	-	-	Organic acids and derivatives	Keto acids and derivatives	Gamma-keto acids and derivatives	0	35.2	-	-	1.3866	1.369	6.81e-08	3.793e-06	5.066	5.0572	5.0481	5.0516	5.058	4.6616	4.5475	4.6104	4.6411	4.5426
neg_6656	CPA(18:0/0:0)	metab_14008	yes	-	neg	-	441.235	4.76798	M+Na-2H	C21H41O6P	0	42.1	HMDB0007004	-	-	-	-	-	Lipids and lipid-like molecules	Glycerophospholipids	Glycerophosphates	0	42.1	-	-	1.5794	1.5299	0.0001073	0.0008744	4.8296	4.6748	4.8496	4.8972	4.8986	4.0845	4.2789	4.4018	4.2912	3.9646
neg_6611	LysoPC(0:0/16:0)	metab_13959	yes	-	neg	66757-27-5	516.304	4.85472	M+Na-2H	C24H50NO7P	0	50.2	HMDB0240262	-	-	-	-	-	Lipids and lipid-like molecules	Glycerophospholipids	Glycerophosphocholines	0	50.2	-	-	2.3575	2.3452	0.004943	0.01485	5.0661	3.0516	5.2307	4.9074	5.2095	3.3515	3.0248	3.0166	3.0009	3.0065
pos_4798	LysoPC(P-18:1(9Z)/0:0)	metab_4104	yes	C04230	pos	-	547.385	5.5979	M+ACN+H	C26H52NO6P	0	31.3	HMDB0010408	Lipids	Phospholipids	map00564;map05231	Metabolism;Human Diseases	Lipid metabolism;Cancer: overview	Lipids and lipid-like molecules	Glycerophospholipids	Glycerophosphocholines	0	31.3	Glycerophospholipid metabolism;Choline metabolism in cancer	Glycerophospholipid metabolism;Choline metabolism in cancer	3.2274	3.1806	3.208e-10	1.534e-07	4.6312	4.6251	4.633	4.6366	4.6397	5.9486	5.77	5.8801	5.7826	5.8546
neg_3783	LysoPE(0:0/18:2(9Z,12Z))	metab_10904	yes	-	neg	-	498.257	4.34105	M+Na-2H	C23H44NO7P	0	68.6	HMDB0011477	-	-	-	-	-	Lipids and lipid-like molecules	Glycerophospholipids	Glycerophosphoethanolamines	0	68.6	-	-	1.9881	1.9379	0.0001694	0.0012	4.9271	4.9038	4.9979	4.9539	4.9513	4.0539	3.9051	4.3414	4.0127	3.4158
neg_6421	LysoPE(22:5(4Z,7Z,10Z,13Z,16Z)/0:0)	metab_13749	yes	-	neg	-	548.273	5.23832	M+Na-2H	C27H46NO7P	0	84.5	HMDB0011524	-	-	-	-	-	Lipids and lipid-like molecules	Glycerophospholipids	Glycerophosphoethanolamines	0	84.5	-	-	1.3124	1.2704	0.0009695	0.004312	4.952	4.7151	4.9585	4.9743	5.0005	4.5629	4.4072	4.6078	4.5317	4.1956
neg_7398	LysoPE(P-16:0/0:0)	metab_14813	yes	-	neg	174062-72-7	458.262	3.84917	M+Na-2H	C21H44NO6P	0	52.4	HMDB0011152	-	-	-	-	-	Lipids and lipid-like molecules	Glycerophospholipids	Glycerophosphoethanolamines	0	52.4	-	-	1.5414	1.496	0.002691	0.009362	4.3404	3.9314	4.1873	4.183	4.2573	3.5018	3.831	3.8325	3.2081	3.2137
neg_8478	LysoPE(0:0/14:1(9Z))	metab_15993	yes	-	neg	-	444.21	2.7259	M+Na-2H	C19H38NO7P	0	58	HMDB0011471	-	-	-	-	-	Lipids and lipid-like molecules	Glycerophospholipids	Glycerophosphoethanolamines	0	58	-	-	1.9205	1.8642	5.236e-06	0.0001011	5.6717	5.335	5.7434	5.6478	5.7574	4.6939	4.6483	4.8009	4.8259	4.7239
pos_6412	PS(22:5(4Z,7Z,10Z,13Z,16Z)/22:6(4Z,7Z,10Z,13Z,16Z,19Z))	metab_5811	yes	C02737	pos	-	463.75	2.21723	M+2Na	C50H76NO10P	0	30.6	PW_C061273;HMDB0112837	Lipids	Phospholipids	map01100;map00564;map01110;map05146;map05322;map00260;map05140	Metabolism;Metabolism;Metabolism;Human Diseases;Human Diseases;Metabolism;Human Diseases	Global and overview maps;Lipid metabolism;Global and overview maps;Infectious disease: parasitic;Immune disease;Amino acid metabolism;Infectious disease: parasitic	Lipids and lipid-like molecules	Glycerophospholipids	Glycerophosphoserines	0	30.6	Metabolic pathways;Glycerophospholipid metabolism;Biosynthesis of secondary metabolites;Amoebiasis;Systemic lupus erythematosus;Glycine, serine and threonine metabolism;Leishmaniasis	Metabolic pathways;Glycerophospholipid metabolism;Biosynthesis of secondary metabolites;Amoebiasis;Systemic lupus erythematosus;Glycine, serine and threonine metabolism;Leishmaniasis	1.0471	1.0434	0.01173	0.04905	5.9089	5.8566	5.8823	5.9431	5.9055	6.1248	5.8762	6.1564	6.0672	6.125
neg_3978	Moroxydine	metab_11113	yes	-	neg	-	401.24	4.6735	2M+Hac-H	C6H13N5O	0	47.4	HMDB0254889	-	-	-	-	-	Organic nitrogen compounds	Organonitrogen compounds	Guanidines	0	47.4	-	-	2.1504	2.0939	2.862e-07	1.16e-05	5.6062	5.5129	5.7504	5.6508	5.7324	4.3322	4.5832	4.6359	4.6246	4.575
pos_6417	Psma-hbed-CC	metab_5816	yes	-	pos	-	474.218	2.2094	M+2H	C44H62N6O17	0	41.8	HMDB0259528	-	-	-	-	-	Organic acids and derivatives	Carboxylic acids and derivatives	Hexacarboxylic acids and derivatives	0	41.8	-	-	1.8077	1.7817	2.569e-06	0.0001272	5.6402	5.6533	5.6836	5.6993	5.6855	5.2611	5.3819	5.3011	5.1867	5.2696
neg_3178	Beta-Alanine, N-(N-(2-((2,2-dimethyl-1,3-dioxolan-4-yl)methoxy)-2-oxo-1-(phenylmethyl)ethyl)-L-phenylalanyl)-	metab_10246	yes	-	neg	-	479.215	3.54583	M-H2O-H	C27H34N2O7	0	36.5	HMDB0257549	-	-	-	-	-	Organic acids and derivatives	Peptidomimetics	Hybrid peptides	0	36.5	-	-	1.7824	1.762	0.0014	0.005673	4.209	3.7215	4.6634	4.1662	4.6586	3.5288	3.3514	3.5235	3.3412	3.3332
neg_4198	Amastatin	metab_11355	yes	C01552	neg	67655-94-1;69400-55-1	455.251	5.17465	M-H2O-H	C21H38N4O8	0	54.6	HMDB0248277	-	-	-	-	-	Organic acids and derivatives	Peptidomimetics	Hybrid peptides	0	54.6	-	-	1.0535	1.0361	0.004982	0.01495	5.265	5.4662	5.2523	5.2835	5.2692	5.5177	5.7189	5.8455	5.4203	5.6605
neg_9977	Beta-Alanyl-L-lysine	metab_17572	yes	C05341	neg	-	216.135	0.552333	M-H	C9H19N3O3	0	37.5	HMDB0060442	-	-	map01100;map00410	Metabolism;Metabolism	Global and overview maps;Metabolism of other amino acids	Organic acids and derivatives	Peptidomimetics	Hybrid peptides	0	37.5	Metabolic pathways;beta-Alanine metabolism	Metabolic pathways;beta-Alanine metabolism	1.2412	1.2376	0.0001771	0.001235	4.0923	4.1683	3.9955	4.0719	4.1038	3.5268	3.8146	3.6264	3.6929	3.7946
pos_7218	Beta-Alanyl-L-arginine	metab_6663	yes	C05340	pos	-	228.145	1.09908	M+H-H2O	C9H19N5O3	0	52.7	HMDB0060441	-	-	map01100;map00410	Metabolism;Metabolism	Global and overview maps;Metabolism of other amino acids	Organic acids and derivatives	Peptidomimetics	Hybrid peptides	0	52.7	Metabolic pathways;beta-Alanine metabolism	Metabolic pathways;beta-Alanine metabolism	2.2918	2.26	0.02905	0.09779	5.4657	5.4933	5.4739	4.129	5.4773	4.158	4.3857	3.8452	5.0188	4.22
pos_7014	Carteolol	metab_6448	yes	C06874	pos	51781-06-7	315.166	1.71157	M+Na	C16H24N2O3	0	34.8	PW_C009020;HMDB0014662	-	-	-	-	-	Organoheterocyclic compounds	Quinolines and derivatives	Hydroquinolines	0	34.8	-	-	1.3607	1.328	0.002104	0.0131	5.6603	5.446	5.6748	5.6323	5.6807	5.4163	5.2711	5.3987	5.4534	5.3025
neg_1427	N-cis-Caffeoyltyramine	metab_8351	yes	-	neg	219773-48-5	643.233	2.25203	M+FA-H, 2M+FA-H	C17H17NO4	0	40.1	HMDB0033026	-	-	-	-	-	Phenylpropanoids and polyketides	Cinnamic acids and derivatives	Hydroxycinnamic acids and derivatives	0	40.1	-	-	2.2669	2.2335	1.975e-06	5.121e-05	5.396	5.3778	5.4758	5.3702	5.3978	4.1296	3.8975	4.1688	4.52	4.1263
neg_3648	Avenanthramide 1f	metab_10758	yes	-	neg	-	294.077	4.14905	M-H2O-H	C17H15NO5	0	34.6	HMDB0029283	-	-	-	-	-	Phenylpropanoids and polyketides	Cinnamic acids and derivatives	Hydroxycinnamic acids and derivatives	0	34.6	-	-	1.5877	1.5412	4.181e-05	0.0004407	4.6306	4.5344	4.6063	4.6527	4.7137	4.0697	3.9632	4.2144	3.7743	3.9951
neg_6794	N1,N10-Diferuloylspermidine	metab_14159	yes	-	neg	70185-61-4	478.232	4.5414	M-H2O-H	C27H35N3O6	0	42	HMDB0033471	-	-	-	-	-	Phenylpropanoids and polyketides	Cinnamic acids and derivatives	Hydroxycinnamic acids and derivatives	0	42	-	-	1.7531	1.7139	0.0007989	0.003724	5.4182	4.6908	5.4427	5.2683	5.4398	4.2377	4.3694	4.5476	4.5524	4.4806
neg_7568	Subaphylline	metab_15000	yes	C10497	neg	501-13-3	573.289	3.64232	2M+FA-H	C14H20N2O3	0	61	HMDB0033463	-	-	map01100;map00330	Metabolism;Metabolism	Global and overview maps;Amino acid metabolism	Phenylpropanoids and polyketides	Cinnamic acids and derivatives	Hydroxycinnamic acids and derivatives	0	61	Metabolic pathways;Arginine and proline metabolism	Metabolic pathways;Arginine and proline metabolism	1.7465	1.8079	0.005701	0.01648	3.9299	4.0335	2.8011	3.7945	4.1179	2.8035	2.8127	2.8045	2.7889	2.9496
neg_8619	N1,N10-Dicoumaroylspermidine	metab_16147	yes	-	neg	65715-79-9	474.184	2.54897	M+K-2H	C25H31N3O4	0	51.5	HMDB0033469	-	-	-	-	-	Phenylpropanoids and polyketides	Cinnamic acids and derivatives	Hydroxycinnamic acids and derivatives	0	51.5	-	-	2.5948	2.5226	0.0001456	0.001074	5.1124	4.2374	5.3891	5.3175	5.3366	3.666	3.2168	3.2593	3.0049	3.6887
pos_2468	Caffeoylferuloylspermidine	metab_1582	yes	-	pos	114916-07-3	506.224	2.95065	M+Na	C26H33N3O6	0	52.1	HMDB0033470	-	-	-	-	-	Phenylpropanoids and polyketides	Cinnamic acids and derivatives	Hydroxycinnamic acids and derivatives	0	52.1	-	-	2.7696	2.7171	0.0007089	0.00557	5.4541	5.1016	5.7274	5.3946	5.6629	4.1384	4.7359	4.0464	4.7648	4.6229
pos_2520	Isopulegone caffeate	metab_1638	yes	-	pos	179694-78-1	380.18	3.07533	M+ACN+Na	C19H24O4	0	42.7	HMDB0029566	-	-	-	-	-	Phenylpropanoids and polyketides	Cinnamic acids and derivatives	Hydroxycinnamic acids and derivatives	0	42.7	-	-	2.2837	2.265	0.003988	0.02176	4.8202	4.0598	5.0373	4.969	5.0163	4.0347	4.0419	4.0462	4.0507	4.0523
pos_1650	2-Hydroxycinnamic acid	metab_7488	yes	C01772;C05838	pos	495-79-4;614-60-8	165.054	1.57222	M+H	C9H8O3	71.5	0	HMDB0041592;HMDB0002641	-	-	map01100;map00360;map01110;map00999;map01120	Metabolism;Metabolism;Metabolism;Metabolism;Metabolism	Global and overview maps;Amino acid metabolism;Global and overview maps;Biosynthesis of other secondary metabolites;Global and overview maps	Phenylpropanoids and polyketides	Cinnamic acids and derivatives	Hydroxycinnamic acids and derivatives	71.5	0	Metabolic pathways;Phenylalanine metabolism;Biosynthesis of secondary metabolites;Biosynthesis of various plant secondary metabolites;Microbial metabolism in diverse environments	Metabolic pathways;Phenylalanine metabolism;Biosynthesis of secondary metabolites;Biosynthesis of various plant secondary metabolites;Microbial metabolism in diverse environments	1.9471	1.9202	0.000635	0.005095	4.1411	4.1119	4.2165	4.1234	4.1827	4.8514	4.6488	4.3182	4.7251	4.7346
neg_2642	6-Hydroxymelatonin	metab_9655	yes	C05643	neg	2208-41-5	293.114	2.90288	M+FA-H	C13H16N2O3	0	43.6	PW_C002052;HMDB0004081	-	-	map00380	Metabolism	Amino acid metabolism	Organoheterocyclic compounds	Indoles and derivatives	Hydroxyindoles	0	43.6	Tryptophan metabolism	Tryptophan metabolism	1.0215	1.029	0.007833	0.02087	5.0913	4.7287	5.2009	5.11	5.1977	4.7764	4.7072	4.783	4.7817	4.7179
neg_4060	11-beta-Hydroxyandrosterone-3-glucuronide	metab_17596	yes	C05643	neg	-	527.251	4.84402	M+FA-H	C25H38O9	0	77.1	HMDB0010351;LMST05010030;LMST05010055	-	-	map00380	Metabolism	Amino acid metabolism	Organoheterocyclic compounds	Indoles and derivatives	Hydroxyindoles	0	77.1	Tryptophan metabolism	Tryptophan metabolism	2.0978	2.0812	0.00409	0.01291	5.111	3.5391	5.1722	5.074	5.1226	3.548	3.5572	3.549	3.5334	3.5389
pos_2243	Pirbuterol	metab_1337	yes	C07807	pos	38677-81-5	241.154	2.50575	M+H	C12H20N2O3	0	34.6	HMDB0015407	-	-	-	-	-	Organoheterocyclic compounds	Pyridines and derivatives	Hydroxypyridines	0	34.6	-	-	1.793	1.772	4.744e-07	3.437e-05	5.3568	5.3338	5.2872	5.3216	5.2418	4.9791	4.8918	4.9535	4.9208	4.8992
neg_6600	Prednisone	metab_13947	yes	C07370	neg	1953-03-02	393.145	4.87533	M+Cl	C21H26O5	0	59.9	PW_C009120;LMST02030180;HMDB0014773;MJDBOTE0001633	-	-	-	-	-	Lipids and lipid-like molecules	Steroids and steroid derivatives	Hydroxysteroids	0	59.9	-	-	1.8023	1.7456	0.01395	0.03269	2.8802	1.4006	2.898	2.9662	1.9002	1.4092	1.4181	1.4102	1.3952	1.4005
neg_384	Imidazole Lactic Acid	metab_10962	yes	C05568	neg	-	155.045	0.616867	M-H, 2M+Hac-H	C6H8N2O3	55.4	0	HMDB0253418	-	-	map01100;map00340	Metabolism;Metabolism	Global and overview maps;Amino acid metabolism	Organoheterocyclic compounds	Azoles	Imidazoles	55.4	0	Metabolic pathways;Histidine metabolism	Metabolic pathways;Histidine metabolism	1.4605	1.4277	3.67e-05	0.0003989	5.0686	5.0544	5.0934	5.0781	5.0615	4.5552	4.4918	4.706	4.6393	4.3363
pos_32	Methylimidazoleacetic acid	metab_2350	yes	C05828	pos	2625-49-2	173.092	0.895967	M+H, M+Na, M+K, M+CH3OH+H, M+H-H2O	C6H8N2O2	0	32.6	HMDB0002820;PW_C001712	-	-	map01100;map00340	Metabolism;Metabolism	Global and overview maps;Amino acid metabolism	Organoheterocyclic compounds	Azoles	Imidazoles	0	32.6	Metabolic pathways;Histidine metabolism	Metabolic pathways;Histidine metabolism	1.3691	1.345	1.27e-06	6.952e-05	7.4345	7.4035	7.4325	7.4089	7.413	7.2182	7.1733	7.2001	7.2422	7.1515
pos_4843	1-(2-Azabicyclo[2.2.2]octan-2-yl)-2-[2-(3,5-dimethylphenyl)-3-[(2S)-1-(2-pyridin-2-ylethylamino)propan-2-yl]-1H-indol-5-yl]-2-methylpropan-1-one	metab_4152	yes	-	pos	-	563.38	5.49573	M+H	C37H46N4O	0	56.5	HMDB0252903	-	-	-	-	-	Organoheterocyclic compounds	Indoles and derivatives	Indoles	0	56.5	-	-	2.504	2.4686	4.438e-10	1.99e-07	4.9712	4.9651	4.9731	4.9766	4.9797	5.716	5.6994	5.7688	5.6929	5.6415
pos_537	Indoleacrylic acid	metab_4717	yes	-	pos	29953-71-7	188.07	2.42798	M+H, M+NH4	C11H9NO2	40.9	0	HMDB0000734	-	-	-	-	-	Organoheterocyclic compounds	Indoles and derivatives	Indoles	40.9	0	-	-	1.152	1.1282	3.595e-05	0.0009379	5.9033	5.954	5.8365	5.9153	5.8844	6.0594	6.0466	6.0728	6.064	6.0609
pos_6237	Alpha-Methyltryptamine	metab_5619	yes	C20127	pos	299-26-3	207.149	2.4358	M+CH3OH+H	C11H14N2	0	56	HMDB0245770	-	-	-	-	-	Organoheterocyclic compounds	Indoles and derivatives	Indoles	0	56	-	-	1.654	1.6199	8.184e-05	0.001785	4.942	4.8643	4.9817	4.9656	4.9696	4.6844	4.4912	4.7086	4.543	4.6023
pos_6698	Alpha-(Dimethylaminomethyl)-2-(3-ethyl-5-methyl-4-isoxazolyl)-1H-indole-3-methanol	metab_6103	yes	-	pos	-	327.19	1.91418	2M+3H2O+2H	C18H23N3O2	0	43	HMDB0248184	-	-	-	-	-	Organoheterocyclic compounds	Indoles and derivatives	Indoles	0	43	-	-	1.3945	1.3634	0.005138	0.02629	5.2131	5.3586	5.4818	5.3056	5.4098	5.1127	4.866	5.2133	5.0769	5.1061
neg_8935	2-Oxomelatonin	metab_16495	yes	-	neg	-	293.114	2.16367	M+FA-H	C13H16N2O3	0	38.2	HMDB0060721	-	-	-	-	-	Organoheterocyclic compounds	Indoles and derivatives	Indolines	0	38.2	-	-	2.1424	2.0857	2.491e-05	0.000305	4.5756	4.3528	4.8811	4.8072	4.8089	3.7192	3.2451	3.4995	3.7113	3.5915
pos_560	3-Indolepropionic acid	metab_4947	yes	-	pos	830-96-6	190.086	2.56812	M+H-H2O, M+H	C11H11NO2	69.1	0	HMDB0002302	-	-	-	-	-	Organoheterocyclic compounds	Indoles and derivatives	Indolyl carboxylic acids and derivatives	69.1	0	-	-	1.5545	1.5252	0.002763	0.01621	5.1288	4.9189	5.1724	5.1246	5.1898	4.8885	4.5976	4.8868	4.6529	4.8383
pos_5964	Dazmegrel	metab_5320	yes	-	pos	-	584.303	2.82572	2M+NH4	C16H17N3O2	0	34.6	HMDB0250884	-	-	-	-	-	Organoheterocyclic compounds	Indoles and derivatives	Indolyl carboxylic acids and derivatives	0	34.6	-	-	1.639	1.6742	0.01616	0.06291	4.2402	4.8346	4.7397	4.7202	4.1928	4.2527	4.082	4.0863	4.0908	4.0924
neg_6556	Falipamil	metab_13897	yes	-	neg	-	473.225	4.9819	M+FA-H	C24H32N2O5	0	34.6	HMDB0252160	-	-	-	-	-	Organoheterocyclic compounds	Isoindoles and derivatives	Isoindolines	0	34.6	-	-	2.0368	1.9803	1.998e-05	0.0002605	4.0158	3.5577	4.0871	3.8552	4.2122	2.8913	2.9006	2.969	2.9779	2.8823
neg_6298	7-(4-Hydroxyphenyl)-1-phenyl-4-hepten-3-one	metab_13614	yes	-	neg	100667-52-5	605.294	5.4309	2M+FA-H	C19H20O2	0	81.5	HMDB0033295	-	-	-	-	-	Phenylpropanoids and polyketides	Diarylheptanoids	Linear diarylheptanoids	0	81.5	-	-	1.1497	1.181	0.0002335	0.001488	4.8514	4.5923	4.868	4.8135	4.8243	5.1712	5.0916	5.0899	5.1837	5.1162
pos_4763	Alpha-Dimorphecolic acid	metab_4066	yes	C14767	pos	73543-67-6	314.268	5.65275	M+NH4	C18H32O3	0	34.2	HMDB0004670	-	-	map00591;map03320	Metabolism;Organismal Systems	Lipid metabolism;Endocrine system	Lipids and lipid-like molecules	Fatty Acyls	Lineolic acids and derivatives	0	34.2	Linoleic acid metabolism;PPAR signaling pathway	Linoleic acid metabolism;PPAR signaling pathway	1.4734	1.4611	0.0009572	0.007122	5.1202	5.2646	5.0413	5.1687	4.9817	5.4899	5.3357	5.3565	5.4485	5.3922
neg_6911	Lipoyllysine	metab_14288	yes	-	neg	20902-53-8	315.12	4.38905	M-H2O-H	C14H26N2O3S2	0	44.6	HMDB0012996	-	-	-	-	-	Organoheterocyclic compounds	Dithiolanes	Lipoamides	0	44.6	-	-	2.1059	2.1102	0.007504	0.02014	4.7597	3.0632	5.0015	4.641	4.9974	3.5023	3.1294	3.0731	3.0575	3.0631
neg_4190	Lycorine	metab_11347	yes	C08532	neg	476-28-8	308.092	5.1481	M+Na-2H	C16H17NO4	0	40.5	HMDB0254256;MJDBOTE0000964	-	-	map00950;map01063	Metabolism;Metabolism	Biosynthesis of other secondary metabolites;Chemical structure transformation maps	Alkaloids and derivatives	Amaryllidaceae alkaloids	Lycorine-type amaryllidaceae alkaloids	0	40.5	Isoquinoline alkaloid biosynthesis;Biosynthesis of alkaloids derived from shikimate pathway	Isoquinoline alkaloid biosynthesis;Biosynthesis of alkaloids derived from shikimate pathway	1.4787	1.4414	9.538e-06	0.0001538	5.4917	5.4474	5.498	5.619	5.5961	5.1115	4.9617	5.0885	4.8986	4.9302
neg_1070	Dhesn	metab_7958	yes	-	neg	-	530.279	5.49008	M-H2O-H, M+Cl	C30H39N5O5	0	72.5	HMDB0251109	-	-	-	-	-	Alkaloids and derivatives	Ergoline and derivatives	Lysergic acids and derivatives	0	72.5	-	-	1.4378	1.399	0.0001313	0.00101	5.267	4.8873	5.2488	5.1706	5.2806	4.6565	4.7089	4.5757	4.6637	4.6248
neg_8268	Dihydroergocornine	metab_15762	yes	-	neg	-	598.284	2.96727	M+Cl	C31H41N5O5	0	83.5	HMDB0251308	-	-	-	-	-	Alkaloids and derivatives	Ergoline and derivatives	Lysergic acids and derivatives	0	83.5	-	-	1.8399	1.8024	4.923e-08	2.951e-06	5.6114	5.631	5.6572	5.6881	5.6364	4.7624	4.7513	4.9464	4.9082	4.8601
neg_6960	6-Hydroxyhexanoic Acid	metab_14338	yes	C06103	neg	1191-25-9	131.07	4.33305	M-H	C6H12O3	86	0	HMDB0012843	-	-	map01220;map00930;map01120	Metabolism;Metabolism;Metabolism	Global and overview maps;Xenobiotics biodegradation and metabolism;Global and overview maps	Organic acids and derivatives	Hydroxy acids and derivatives	Medium-chain hydroxy acids and derivatives	86	0	Degradation of aromatic compounds;Caprolactam degradation;Microbial metabolism in diverse environments	Degradation of aromatic compounds;Caprolactam degradation;Microbial metabolism in diverse environments	2.4083	2.3629	1.934e-10	3.857e-08	7.2408	7.1559	7.2288	7.2346	7.2349	5.9503	5.8607	5.8533	5.7554	5.8584
pos_49	Polyethylene, oxidized	metab_4213	yes	-	pos	68441-17-8	262.165	5.23607	M+H-2H2O, M+H, M+NH4, M+H-H2O	C12H20O5	0	56.2	HMDB0032472	-	-	-	-	-	Organic acids and derivatives	Keto acids and derivatives	Medium-chain keto acids and derivatives	0	56.2	-	-	2.4884	2.4549	1.077e-07	1.17e-05	5.9631	6.0318	5.9754	6.0054	5.9556	5.2331	5.1614	5.2481	5.3986	5.2567
pos_6212	(S)-5-Amino-3-oxohexanoate	metab_5592	yes	C03656	pos	19355-90-9	332.181	2.45918	2M+ACN+H	C6H11NO3	0	59.4	HMDB0012131	-	-	map01100;map00310	Metabolism;Metabolism	Global and overview maps;Amino acid metabolism	Organic acids and derivatives	Keto acids and derivatives	Medium-chain keto acids and derivatives	0	59.4	Metabolic pathways;Lysine degradation	Metabolic pathways;Lysine degradation	1.6078	1.5674	0.004443	0.02364	4.688	4.4196	4.6028	4.7127	4.7052	4.4874	4.0307	4.3281	4.2605	4.1967
neg_3460	Dihydroconiferyl alcohol	metab_10555	yes	C10448	neg	2305-13-7	545.273	3.89567	3M-H	C10H14O3	0	66.7	HMDB0303757	-	-	-	-	-	Benzenoids	Phenols	Methoxyphenols	0	66.7	-	-	2.2358	2.2295	0.004281	0.01337	5.1288	3.2891	5.1814	4.7501	5.2	3.2751	3.2843	3.2761	3.2604	3.266
neg_4348	(S)-[8]-Gingerol	metab_11521	yes	C17495	neg	23513-08-8	343.187	5.42625	M+Na-2H	C19H30O4	0	38.5	HMDB0033615	-	-	-	-	-	Benzenoids	Phenols	Methoxyphenols	0	38.5	-	-	1.8589	1.8503	0.002642	0.009238	4.7168	3.721	4.8519	4.6241	4.883	3.363	3.7305	3.5958	3.5337	3.7336
neg_8177	4-Deoxypyridoxine	metab_15664	yes	-	neg	-	458.226	3.05563	3M-H	C8H11NO2	0	59.6	HMDB0246408	-	-	-	-	-	Organoheterocyclic compounds	Pyridines and derivatives	Methylpyridines	0	59.6	-	-	1.126	1.0957	0.0002235	0.001447	5.5216	5.4527	5.6858	5.646	5.6954	5.3072	5.2436	5.2969	5.3049	5.22
neg_7691	2-[(1S,2S,4R)-2-Hydroxy-7,7-dimethyl-1-(spiro[indene-1,4'-piperidine]-1'-ylsulfonylmethyl)-2-bicyclo[2.2.1]heptanyl]acetic acid	metab_15133	yes	-	neg	-	504.21	3.5378	M+FA-H	C25H33NO5S	0	56.4	HMDB0249983	-	-	-	-	-	Lipids and lipid-like molecules	Prenol lipids	Monoterpenoids	0	56.4	-	-	1.6682	1.6217	1.979e-05	0.0002599	5.4821	5.2673	5.6578	5.4545	5.6351	4.7449	4.7567	4.8061	4.9047	4.8586
pos_126	(-)-Guttiferone E	metab_285	yes	C09929	pos	78824-30-3	324.171	1.89858	M+2Na, M+2Na-H, M+H+Na	C38H50O6	0	34.5	HMDB0039154	-	-	-	-	-	Lipids and lipid-like molecules	Prenol lipids	Monoterpenoids	0	34.5	-	-	1.6853	1.6665	0.002179	0.01346	5.2316	5.0938	5.1334	5.0396	4.9752	4.8715	4.7679	4.6954	4.7794	4.4277
pos_6040	Goyasaponin I	metab_5404	yes	-	pos	333333-20-3	690.324	2.70878	M+2H	C65H102O31	0	66.8	HMDB0037221	-	-	-	-	-	Lipids and lipid-like molecules	Prenol lipids	Monoterpenoids	0	66.8	-	-	1.6255	1.6276	0.04364	0.1321	5.2216	5.1329	4.3609	4.9734	5.3036	4.3089	4.431	4.6203	4.2816	4.9052
neg_4312	3-Fluorophenmetrazine	metab_11483	yes	-	neg	-	435.21	5.36468	2M+FA-H	C11H14FNO	0	30.2	HMDB0244559	-	-	-	-	-	Organoheterocyclic compounds	Oxazinanes	Morpholines	0	30.2	-	-	1.6601	1.7809	0.02885	0.05855	4.0354	3.21	4.9259	3.8212	4.8832	3.1114	3.328	3.7064	3.1248	2.8818
neg_8313	Landiolol	metab_15812	yes	-	neg	-	530.247	2.91883	M+Na-2H	C25H39N3O8	0	74	HMDB0253969	-	-	-	-	-	Organoheterocyclic compounds	Oxazinanes	Morpholines	0	74	-	-	1.7956	1.7935	0.002701	0.009382	5.5693	5.0193	6.1252	5.5811	6.1721	4.7809	4.7207	4.8312	4.7536	4.8274
neg_7633	5-Hydroxy-1-methylpyrrolidin-2-one	metab_15071	yes	-	neg	-	344.183	3.58582	3M-H	C5H9NO2	0	48.5	HMDB0246801	-	-	-	-	-	Organoheterocyclic compounds	Pyrrolidines	N-alkylpyrrolidines	0	48.5	-	-	1.4253	1.4064	0.01535	0.03516	4.9423	4.5363	5.0186	4.9325	5.045	4.4016	4.0909	4.5565	3.5907	4.6151
pos_6454	3,4-Dihydroxy-2-hydroxymethyl-1-pyrrolidinepropanamide	metab_5856	yes	-	pos	-	472.24	2.16267	2M+ACN+Na	C8H16N2O4	0	63.6	HMDB0039948	-	-	-	-	-	Organoheterocyclic compounds	Pyrrolidines	N-alkylpyrrolidines	0	63.6	-	-	1.6608	1.6261	0.000247	0.004102	6.1249	6.0857	6.2088	6.1244	6.1531	5.9052	5.7063	5.7821	5.9129	5.6559
pos_6251	Dansylcadaverine	metab_5634	yes	-	pos	-	318.165	2.42017	M+H-H2O	C17H25N3O2S	0	44.6	HMDB0250850	-	-	-	-	-	Benzenoids	Naphthalenes	Naphthalene sulfonic acids and derivatives	0	44.6	-	-	2.4399	2.4158	0.002795	0.01637	5.5611	4.8822	5.6889	5.5489	5.7562	4.8078	4.5403	4.945	4.2781	4.7318
neg_3021	Dioncophylline C	metab_10075	yes	C12337	neg	-	362.175	3.34463	M-H	C23H25NO3	0	41.3	HMDB0251431	-	-	-	-	-	Organoheterocyclic compounds	Isoquinolines and derivatives	Naphthylisoquinolines	0	41.3	-	-	1.5725	1.5915	0.008257	0.02174	4.451	4.8059	3.8374	4.6337	3.7192	5.0655	5.0556	5.032	5.0326	5.0431
neg_8908	(S)-3-(6-Methoxypyridin-3-yl)-3-(2-oxo-3-(3-(5,6,7,8-tetrahydro-1,8-naphthyridin-2-yl)propyl)imidazolidin-1-yl)propanoic acid	metab_16465	yes	-	neg	-	438.211	2.23612	M-H	C23H29N5O4	0	33.7	HMDB0254780	-	-	-	-	-	Organoheterocyclic compounds	Diazanaphthalenes	Naphthyridines	0	33.7	-	-	1.0238	0.9936	0.02228	0.04745	5.4076	5.2108	5.461	5.4729	5.4186	4.9578	4.7225	5.3343	4.9922	5.2624
neg_2961	Stallimycin	metab_10007	yes	-	neg	-	462.199	3.27273	M-H2O-H	C22H27N9O4	0	39.9	HMDB0251483	-	-	-	-	-	Organic nitrogen compounds	Organonitrogen compounds	N-arylamides	0	39.9	-	-	1.456	1.4221	8.613e-08	4.5e-06	5.5373	5.5522	5.5785	5.5496	5.5584	4.976	5.1054	5.1184	5.0156	5.05
neg_9729	TETRATHIONIC ACID	metab_17312	yes	C02084	neg	13760-29-7	224.866	0.6487	M-H	H2O6S4	0	43.2	HMDB0258934	-	-	map01100;map02020;map00920;map01120	Metabolism;Environmental Information Processing;Metabolism;Metabolism	Global and overview maps;Signal transduction;Energy metabolism;Global and overview maps	Homogeneous non-metal compounds	Non-metal oxoanionic compounds	Non-metal tetrathionates	0	43.2	Metabolic pathways;Two-component system;Sulfur metabolism;Microbial metabolism in diverse environments	Metabolic pathways;Two-component system;Sulfur metabolism;Microbial metabolism in diverse environments	1.0702	1.0318	0.001198	0.005055	5.1436	5.2491	5.1554	5.2099	5.2714	5.5529	5.5864	5.301	5.4876	5.6228
neg_1125	Homoarecoline	metab_8019	yes	-	neg	28125-84-0	397.234	5.64433	M+FA-H, 2M+Hac-H	C9H15NO2	0	31.3	HMDB0038321	-	-	-	-	-	Alkaloids and derivatives	Not Available	Not Available	0	31.3	-	-	1.0418	1.0124	0.0006126	0.003052	4.6681	4.5325	4.65	4.6726	4.6836	4.3813	4.3473	4.3663	4.2004	4.4784
neg_1657	Calystegine A6	metab_8604	yes	-	neg	177794-04-6	204.087	0.6487	M+FA-H	C7H13NO3	0	49.5	HMDB0031345	-	-	-	-	-	Alkaloids and derivatives	Tropane alkaloids	Not Available	0	49.5	-	-	1.3069	1.2796	7.891e-10	1.244e-07	4.4137	4.4687	4.4093	4.44	4.4374	4.8144	4.831	4.8402	4.8452	4.8465
neg_2130	PL	metab_9098	yes	C18210	neg	-	563.283	2.06795	M+Na-2H	C28H46O10	0	80.2	HMDB0302594	-	-	-	-	-	Phenylpropanoids and polyketides	Macrolides and analogues	Not Available	0	80.2	-	-	1.7623	1.7342	6.711e-09	5.716e-07	6.0304	6.0568	6.0358	6.0309	6.03	5.2148	5.277	5.3321	5.3868	5.3142
neg_2271	Stavudine	metab_9251	yes	C07312	neg	3056-17-5	447.156	2.34802	2M-H	C10H12N2O4	0	31.4	PW_C009132;HMDB0014787	-	-	-	-	-	Nucleosides, nucleotides, and analogues	Nucleoside and nucleotide analogues	Not Available	0	31.4	-	-	1.6489	1.609	6.628e-07	2.181e-05	5.1076	5.0691	5.1868	5.1235	5.1842	4.3594	4.4566	4.5231	4.6064	4.4779
neg_2337	Tigecycline	metab_9322	yes	C12012	neg	220620-09-7	584.268	2.46053	M-H	C29H39N5O8	0	55.3	PW_C009054;HMDB0014700	-	-	-	-	-	Phenylpropanoids and polyketides	Tetracyclines	Not Available	0	55.3	-	-	1.1783	1.1576	3.317e-06	7.3e-05	5.5916	5.6052	5.6293	5.6448	5.6	5.318	5.1795	5.3283	5.3144	5.2609
neg_2667	Vindoline	metab_9682	yes	C01626	neg	2182-14-1	437.204	2.9354	M-H2O-H	C25H32N2O6	0	53.7	HMDB0259814;MJDBOTE0000982	-	-	map01110;map01063;map00901	Metabolism;Metabolism;Metabolism	Global and overview maps;Chemical structure transformation maps;Biosynthesis of other secondary metabolites	Alkaloids and derivatives	Plumeran-type alkaloids	Not Available	0	53.7	Biosynthesis of secondary metabolites;Biosynthesis of alkaloids derived from shikimate pathway;Indole alkaloid biosynthesis	Biosynthesis of secondary metabolites;Biosynthesis of alkaloids derived from shikimate pathway;Indole alkaloid biosynthesis	2.0575	2.0322	0.002936	0.009992	4.693	3.9241	5.2009	4.2562	5.2244	3.1866	3.1685	3.4887	3.7029	3.7515
neg_2806	2'',6''-O-Diacetyloninin	metab_9836	yes	-	neg	-	461.189	3.0956	2M+FA-H	C9H12N4O2	0	61.2	HMDB0302015	-	-	-	-	-	Organoheterocyclic compounds	Pteridines and derivatives	Not Available	0	61.2	-	-	1.4675	1.47	0.01273	0.0303	4.5452	4.1769	5.0346	4.9067	5.0763	4.0902	3.6527	4.2961	4.0047	4.3383
neg_2818	DG(2:0/LTE4/0:0)	metab_9849	yes	-	neg	-	590.258	3.11213	M+Cl	C28H45NO8S	0	60.4	HMDB0296923	-	-	-	-	-	Not Available	Not Available	Not Available	0	60.4	-	-	1.2472	1.2802	0.01045	0.02605	5.2432	4.672	5.4029	5.0869	5.4376	4.5789	4.7538	4.7538	4.7431	4.6199
neg_2832	1-Isothiocyanatopentane	metab_9865	yes	-	neg	629-12-9	128.053	3.1361	M-H	C6H11NS	0	34.4	HMDB0038433	-	-	-	-	-	Organosulfur compounds	Isothiocyanates	Not Available	0	34.4	-	-	1.794	1.7546	0.006164	0.01751	3.4793	3.3847	4.3717	3.6439	3.5556	3.1512	2.3749	2.3667	3.227	2.5483
neg_2926	BERBAMINE	metab_9968	yes	C09357	neg	478-61-5	653.29	3.23213	M+FA-H	C37H40N2O6	0	57.9	HMDB0242681	-	-	-	-	-	Lignans, neolignans and related compounds	Not Available	Not Available	0	57.9	-	-	2.1645	2.1297	3.163e-05	0.0003589	4.9147	4.8601	4.8931	4.9107	4.8577	3.5291	4.2317	3.5302	3.8143	3.5201
neg_2950	2-[(3,17-Dihydroxy-13-methyl-8,9,11,12,14,15,16,17-octahydro-7H-cyclopenta[a]phenanthren-6-ylidene)amino]oxyacetic acid	metab_9995	yes	-	neg	-	380.146	3.25612	M+Na-2H	C20H25NO5	0	39.2	HMDB0246188	-	-	-	-	-	Not Available	Not Available	Not Available	0	39.2	-	-	1.1014	1.1087	0.004398	0.01363	4.9345	4.6881	5.1582	4.8634	5.132	4.5262	4.6512	4.5954	4.6118	4.628
neg_3489	Alpha-Hydroxy-N-desmethyltamoxifen	metab_10585	yes	C16549	neg	-	408.177	3.93317	M+Cl	C25H27NO2	0	45.8	HMDB0060668	-	-	map00982	Metabolism	Xenobiotics biodegradation and metabolism	Phenylpropanoids and polyketides	Stilbenes	Not Available	0	45.8	Drug metabolism - cytochrome P450	Drug metabolism - cytochrome P450	1.9219	1.9032	0.008489	0.02222	5.0833	3.7972	5.0994	5.0272	5.0773	3.5133	3.128	4.2229	3.7387	3.9788
neg_3499	MG(0:0/LTE4/0:0)	metab_10596	yes	-	neg	-	558.278	3.94918	M+FA-H	C26H43NO7S	0	55.9	HMDB0260532	-	-	-	-	-	Not Available	Not Available	Not Available	0	55.9	-	-	2.2892	2.2264	3.261e-05	0.0003667	5.0729	4.4695	5.0224	5.0151	5.0714	4.0093	3.4609	3.562	3.4406	3.6921
neg_3684	DG(2:0/PGF2alpha/0:0)	metab_10798	yes	-	neg	-	515.284	4.19705	M+FA-H	C25H42O8	0	59.3	HMDB0296915	-	-	-	-	-	Not Available	Not Available	Not Available	0	59.3	-	-	2.3971	2.3326	1.194e-07	5.663e-06	5.97	5.6404	6.0117	5.9605	6.0092	4.472	4.4958	4.6033	4.55	4.6585
neg_3735	Henatinib	metab_10852	yes	-	neg	-	449.204	4.27705	M-H2O-H	C25H29FN4O4	0	75.6	HMDB0253087	-	-	-	-	-	Organoheterocyclic compounds	Pyrroloazepines	Not Available	0	75.6	-	-	1.7457	1.7013	0.0001963	0.001313	5.428	4.9503	5.547	5.4034	5.5805	4.62	4.4958	4.7426	4.5514	4.6127
neg_3912	Capecitabine	metab_11043	yes	C12650	neg	154361-50-9	358.144	4.5574	M-H	C15H22FN3O6	0	36	HMDB0015233;PW_C009523	-	-	map00983	Metabolism	Xenobiotics biodegradation and metabolism	Nucleosides, nucleotides, and analogues	5''-deoxyribonucleosides	Not Available	0	36	Drug metabolism - other enzymes	Drug metabolism - other enzymes	1.4119	1.3869	6.115e-06	0.0001145	5.7919	5.7758	5.8483	5.9355	5.8642	5.4484	5.2563	5.3396	5.4364	5.3167
neg_3959	PC(2:0/20:4(6Z,8E,10E,14Z)-2OH(5S,12R))	metab_11092	yes	-	neg	-	654.278	4.64595	M+K-2H	C30H52NO10P	0	59.2	HMDB0288838	-	-	-	-	-	Not Available	Not Available	Not Available	0	59.2	-	-	1.6097	1.57	1.093e-06	3.197e-05	4.993	4.9685	4.7489	4.9462	4.8751	5.4983	5.5197	5.5374	5.5946	5.4965
neg_4005	Isopiperolein B	metab_11144	yes	-	neg	-	364.188	4.73765	M+Na-2H	C21H29NO3	0	40.7	HMDB0033959	-	-	-	-	-	Organoheterocyclic compounds	Benzodioxoles	Not Available	0	40.7	-	-	1.4602	1.4381	0.0007289	0.003481	5.3935	4.99	5.573	5.3576	5.5606	4.7608	4.8232	4.8627	4.8027	4.7947
neg_4019	PC(20:4(5Z,8Z,11Z,14Z)-OH(19S)/2:0)	metab_11159	yes	-	neg	-	646.342	4.75923	M+FA-H	C30H52NO9P	0	78.3	HMDB0288811	-	-	-	-	-	Not Available	Not Available	Not Available	0	78.3	-	-	1.6536	1.6293	1.152e-08	9.148e-07	5.3642	5.3982	5.343	5.3851	5.3373	4.6447	4.6806	4.7658	4.7639	4.7526
neg_4089	DG(20:4(5E,8Z,12Z,14Z)-OH(11R)/8:0/0:0)	metab_11235	yes	-	neg	-	557.33	4.89695	M+K-2H	C31H52O6	0	70.4	HMDB0297104	-	-	-	-	-	Not Available	Not Available	Not Available	0	70.4	-	-	1.0299	0.9985	1.407e-05	0.0002042	5.295	5.2184	5.2761	5.2578	5.2958	4.954	4.9678	5.0829	5.0065	5.0402
neg_4290	Cholylphenylalanine	metab_11458	yes	-	neg	-	592.299	5.32637	M+K-2H	C33H49NO6	0	48.8	HMDB0242371	-	-	-	-	-	Not Available	Not Available	Not Available	0	48.8	-	-	1.0266	0.9983	2.168e-05	0.0002744	5.4402	5.4439	5.4962	5.5316	5.481	5.1657	5.2295	5.2723	5.2706	5.1652
neg_4427	Calindol	metab_11608	yes	-	neg	-	645.325	5.516	2M+FA-H	C21H20N2	0	32	HMDB0249556	-	-	-	-	-	Benzenoids	Naphthalenes	Not Available	0	32	-	-	3.0978	3.0319	2.428e-09	2.524e-07	4.6798	4.6343	4.6575	4.7032	4.682	2.2533	2.388	2.7133	2.3467	2.3804
neg_4609	Deoxycholylarginine	metab_11806	yes	-	neg	-	547.387	5.66032	M-H	C30H52N4O5	0	61.2	HMDB0242418	-	-	-	-	-	Not Available	Not Available	Not Available	0	61.2	-	-	2.6017	2.528	2.419e-06	5.779e-05	3.4134	4.1116	3.4072	3.42	3.5953	5.2194	5.1892	5.3061	5.1458	5.2208
neg_594	4-tert-Butylphenyl salicylate	metab_13230	yes	-	neg	87-18-3	585.252	3.04768	M-H2O-H, 2M+FA-H	C17H18O3	0	59.6	HMDB0041314	-	-	-	-	-	Phenylpropanoids and polyketides	Depsides and depsidones	Not Available	0	59.6	-	-	1.3594	1.3441	1.654e-08	1.244e-06	5.5599	5.5916	5.5945	5.6033	5.5799	5.2039	5.1042	5.1146	5.1637	5.1568
neg_6050	N2-Maltulosylarginine	metab_13349	yes	-	neg	162966-06-5	479.197	5.62038	M-H2O-H	C18H34N4O12	0	43.9	HMDB0041542	-	-	-	-	-	Lipids and lipid-like molecules	Saccharolipids	Not Available	0	43.9	-	-	3.9121	3.8112	4.341e-06	8.8e-05	4.0876	3.7296	5.1289	4.2543	5.2396	0.603	1.43	0.6038	0.5921	0.5963
neg_6101	DG(LTE4/0:0/i-12:0)	metab_13403	yes	-	neg	-	732.394	5.58785	M+K-2H	C38H65NO8S	0	83.1	HMDB0298381	-	-	-	-	-	Not Available	Not Available	Not Available	0	83.1	-	-	2.0229	1.9684	0.005861	0.01684	4.7211	4.6508	4.6437	4.7573	4.5916	2.704	2.7132	3.9273	3.9472	4.126
neg_6222	3-hydroxyquinidine	metab_13532	yes	C07344	neg	53467-23-5	739.367	5.50802	2M+Hac-H	C20H24N2O3	0	30.7	HMDB0001091;HMDB0245907	-	-	-	-	-	Alkaloids and derivatives	Cinchona alkaloids	Not Available	0	30.7	-	-	1.5596	1.5265	1.603e-05	0.0002232	5.1716	5.1102	5.2087	5.1648	5.2276	4.4742	4.5824	4.5769	4.806	4.4623
neg_6228	(1R,9S,10S)-17-[(3-Hydroxycyclobutyl)methyl]-17-azatetracyclo[7.5.3.01,10.02,7]heptadeca-2(7),3,5-triene-4,10-diol	metab_13538	yes	-	neg	-	364.188	5.50802	M+Na-2H	C21H29NO3	0	43	HMDB0242344	-	-	-	-	-	Benzenoids	Phenanthrenes and derivatives	Not Available	0	43	-	-	1.0655	1.0453	1.309e-07	6.178e-06	5.4596	5.4461	5.4552	5.3987	5.4593	5.7127	5.7291	5.6806	5.7398	5.6999
neg_6271	(2r,3r,5s,6r)-2,6-Bis(hydroxymethyl)piperidine-3,4,5-triol	metab_13585	yes	-	neg	-	578.283	5.46455	3M-H	C7H15NO5	0	46.6	HMDB0242543	-	-	-	-	-	Organoheterocyclic compounds	Piperidines	Not Available	0	46.6	-	-	1.581	1.5369	7.863e-06	0.0001368	4.3131	4.5107	4.2719	4.3848	4.2203	5.0373	4.9366	4.9257	5.0011	4.8458
neg_6329	DG(6 keto-PGF1alpha/0:0/8:0)	metab_13648	yes	-	neg	-	615.372	5.38715	M+FA-H	C31H54O9	0	75.6	HMDB0297122	-	-	-	-	-	Not Available	Not Available	Not Available	0	75.6	-	-	1.921	1.8784	1.668e-07	7.441e-06	5.6555	5.6045	5.741	5.7294	5.7547	4.7045	4.784	4.8168	4.9745	4.8204
neg_6437	Indeloxazine	metab_13766	yes	C10918	neg	60929-23-9	461.241	5.22385	2M-H	C14H17NO2	0	64.5	HMDB0253450	-	-	-	-	-	Benzenoids	Indenes and isoindenes	Not Available	0	64.5	-	-	1.2158	1.2076	0.005046	0.01506	4.1159	3.875	4.2393	4.131	4.3536	3.7649	3.6176	3.9936	3.5363	3.6595
neg_6453	Thiencynonate	metab_13784	yes	-	neg	-	344.172	5.20792	M-H2O-H	C20H29NO3S	0	31.8	HMDB0258983	-	-	-	-	-	Organoheterocyclic compounds	Piperidines	Not Available	0	31.8	-	-	1.4914	1.4846	0.005162	0.0153	4.9752	4.1259	4.9512	4.9459	4.9733	4.132	4.1372	4.2442	4.1364	4.1035
neg_6693	Virginiamycin m1	metab_14049	yes	C11299	neg	21411-53-0	546.221	4.7146	M+Na-2H	C28H35N3O7	0	74.5	HMDB0259836	-	-	-	-	-	Phenylpropanoids and polyketides	Macrolide lactams	Not Available	0	74.5	-	-	2.8541	2.7884	1.426e-09	1.773e-07	5.2022	4.9108	5.2442	5.2456	5.1672	3.2414	3.2506	3.2424	3.2268	3.2324
neg_6704	Hygrine	metab_14062	yes	C06179	neg	496-49-1	186.113	4.68713	M+FA-H	C8H15NO	0	33.5	HMDB0302902	-	-	map01100;map00960;map01064	Metabolism;Metabolism;Metabolism	Global and overview maps;Biosynthesis of other secondary metabolites;Chemical structure transformation maps	Alkaloids and derivatives	Not Available	Not Available	0	33.5	Metabolic pathways;Tropane, piperidine and pyridine alkaloid biosynthesis;Biosynthesis of alkaloids derived from ornithine, lysine and nicotinic acid	Metabolic pathways;Tropane, piperidine and pyridine alkaloid biosynthesis;Biosynthesis of alkaloids derived from ornithine, lysine and nicotinic acid	1.0889	1.0707	0.002768	0.009561	4.9905	5.1192	4.9448	5.0441	4.9677	5.2008	5.4754	5.4413	5.1457	5.4769
neg_6745	Hordatine A	metab_14106	yes	C08307	neg	7073-64-5	587.269	4.61797	M+Na-2H	C28H38N8O5	0	71.8	HMDB0030461	-	-	map01100;map01110;map00999	Metabolism;Metabolism;Metabolism	Global and overview maps;Global and overview maps;Biosynthesis of other secondary metabolites	Phenylpropanoids and polyketides	2-arylbenzofuran flavonoids	Not Available	0	71.8	Metabolic pathways;Biosynthesis of secondary metabolites;Biosynthesis of various plant secondary metabolites	Metabolic pathways;Biosynthesis of secondary metabolites;Biosynthesis of various plant secondary metabolites	2.4127	2.3454	5.234e-06	0.0001011	4.396	4.1999	4.8511	4.7923	4.8224	3.2024	3.2117	3.2035	3.1878	3.1934
neg_6773	N-Docosahexaenoyl Methionine	metab_14136	yes	-	neg	-	494.247	4.57342	M+Cl	C27H41NO3S	0	53.8	HMDB0242019	-	-	-	-	-	Not Available	Not Available	Not Available	0	53.8	-	-	2.2186	2.2367	0.02091	0.04519	4.0933	3.3188	5.311	3.2726	5.362	3.2385	2.0385	3.6426	2.2701	2.0364
neg_6815	Ansamitocin P-3	metab_14182	yes	C12045	neg	66584-72-3	655.237	4.5174	M+Na-2H	C32H43ClN2O9	0	46.4	HMDB0248452	-	-	map01052;map01051;map01110	Metabolism;Metabolism;Metabolism	Metabolism of terpenoids and polyketides;Metabolism of terpenoids and polyketides;Global and overview maps	Phenylpropanoids and polyketides	Macrolactams	Not Available	0	46.4	Type I polyketide structures;Biosynthesis of ansamycins;Biosynthesis of secondary metabolites	Type I polyketide structures;Biosynthesis of ansamycins;Biosynthesis of secondary metabolites	2.2137	2.2037	0.004076	0.01289	5.0531	3.4214	5.204	5.1354	5.1781	3.3391	3.3484	3.6623	3.3245	3.3301
neg_6834	12-Hydroxy-13-O-D-glucuronoside-octadec-9Z-enoate	metab_14203	yes	-	neg	-	535.273	4.4931	M+FA-H	C24H42O10	0	33.5	HMDB0060118	-	-	-	-	-	Lipids and lipid-like molecules	Saccharolipids	Not Available	0	33.5	-	-	1.0565	1.0439	0.004836	0.01466	4.8363	4.4075	4.7605	4.8375	4.8389	4.4164	4.4256	4.4174	4.4018	4.4074
neg_7040	PC(2:0/5-iso PGF2VI)	metab_14425	yes	-	neg	-	588.289	4.22905	M-H2O-H	C28H50NO11P	0	68.4	HMDB0288846	-	-	-	-	-	Not Available	Not Available	Not Available	0	68.4	-	-	2.3165	2.443	0.04069	0.07796	0.423	3.6755	0.4191	3.4334	3.979	0.4206	0.4264	0.4212	0.4116	0.415
neg_712	Lethidrone	metab_14510	yes	-	neg	-	667.307	3.50582	M+Na-2H, 2M+FA-H	C19H21NO3	0	37.1	HMDB0254026	-	-	-	-	-	Alkaloids and derivatives	Morphinans	Not Available	0	37.1	-	-	1.0624	1.048	2.247e-05	0.0002822	5.3444	5.3877	5.3342	5.35	5.403	4.9974	5.1152	5.0985	5.1663	5.0495
neg_7220	PC(20:4(5Z,8Z,11Z,14Z)-OH(20)/2:0)	metab_14619	yes	-	neg	-	646.342	4.02902	M+FA-H	C30H52NO9P	0	65.3	HMDB0288807	-	-	-	-	-	Not Available	Not Available	Not Available	0	65.3	-	-	2.6188	2.5686	0.00848	0.02221	4.7125	4.7476	4.7068	4.6057	4.691	2.2381	0.4837	3.4591	3.4748	3.5454
neg_7277	Queuosine	metab_14681	yes	-	neg	57072-36-3	454.162	3.97313	M+FA-H	C17H23N5O7	0	36.5	HMDB0011596	-	-	-	-	-	Nucleosides, nucleotides, and analogues	Pyrrolopyrimidine nucleosides and nucleotides	Not Available	0	36.5	-	-	2.1277	2.129	0.004706	0.01438	4.8187	3.1842	4.9578	4.5524	4.9914	3.1931	3.2024	3.1942	3.1785	3.1841
neg_7546	PS(5-iso PGF2VI/15:0)	metab_14976	yes	-	neg	-	828.411	3.66633	M+K-2H	C39H70NO13P	0	59.2	HMDB0281051	-	-	-	-	-	Not Available	Not Available	Not Available	0	59.2	-	-	2.513	2.4945	0.03435	0.06773	5.7061	5.742	5.6995	5.7061	5.6831	4.735	3.9874	4.2629	4.4649	0.0873
neg_7725	PA(20:4(8Z,11Z,14Z,17Z)-2OH(5S,6R)/12:0)	metab_15171	yes	-	neg	-	709.352	3.49782	M+K-2H	C35H61O10P	0	33.9	HMDB0262821	-	-	-	-	-	Not Available	Not Available	Not Available	0	33.9	-	-	1.0435	1.0137	0.02804	0.05719	4.2232	4.4239	4.2924	4.2797	4.4151	3.6601	4.2369	4.2526	3.6455	3.9862
neg_7898	PC(20:5(7Z,9Z,11E,13E,17Z)-3OH(5,6,15)/2:0)	metab_15357	yes	-	neg	-	630.31	3.31262	M-H	C30H50NO11P	0	68.7	HMDB0288873	-	-	-	-	-	Not Available	Not Available	Not Available	0	68.7	-	-	2.9202	2.8297	1.015e-05	0.00016	5.1987	4.8261	5.2295	5.1842	5.2027	2.817	2.8262	3.8343	2.8024	3.0318
neg_8043	Alpha-[3-[(Hydroxymethyl)nitrosoamino]propyl]-3-pyridinemethanol	metab_15518	yes	C19580	neg	-	495.222	3.1761	2M+FA-H	C10H15N3O3	0	39.4	HMDB0062444	-	-	map05204;map00980	Human Diseases;Metabolism	Cancer: overview;Xenobiotics biodegradation and metabolism	Organoheterocyclic compounds	Pyridines and derivatives	Not Available	0	39.4	Chemical carcinogenesis - DNA adducts;Metabolism of xenobiotics by cytochrome P450	Chemical carcinogenesis - DNA adducts;Metabolism of xenobiotics by cytochrome P450	1.7014	1.6904	7.154e-06	0.0001298	5.0864	5.1693	5.0733	5.1727	4.9579	4.2658	4.4896	4.4063	4.5332	4.2601
neg_8090	5-Isothiocyanato-1-pentene	metab_15570	yes	-	neg	18060-79-2	172.043	3.1361	M+FA-H	C6H9NS	0	48.7	HMDB0034300	-	-	-	-	-	Organosulfur compounds	Isothiocyanates	Not Available	0	48.7	-	-	1.7067	1.66	0.004295	0.01339	4.005	3.9801	4.8975	4.2232	4.2596	3.7463	3.38	3.3275	3.695	3.0055
neg_8233	Miproxifene phosphate	metab_15726	yes	-	neg	-	490.216	2.99925	M-H2O-H	C29H36NO5P	0	53.2	HMDB0254746	-	-	-	-	-	Phenylpropanoids and polyketides	Stilbenes	Not Available	0	53.2	-	-	1.0372	1.1008	0.04689	0.08721	4.4282	4.4024	5.1015	4.4777	5.151	4.2076	4.3357	4.2723	4.3606	4.3626
neg_8731	Litcubinine	metab_16270	yes	-	neg	172924-24-2	627.275	2.40402	2M-H	C18H20NO4+	0	57.9	HMDB0032650	-	-	-	-	-	Organoheterocyclic compounds	Tetrahydroisoquinolines	Not Available	0	57.9	-	-	1.0598	1.041	5.797e-06	0.0001098	5.2973	5.3118	5.3514	5.3598	5.3131	5.0269	5.0291	5.0587	5.1417	5.0181
neg_8765	Cinepazide	metab_16307	yes	-	neg	-	462.221	2.34802	M+FA-H	C22H31N3O5	0	49.7	HMDB0250262	-	-	-	-	-	Phenylpropanoids and polyketides	Cinnamic acids and derivatives	Not Available	0	49.7	-	-	1.8742	1.8216	0.0001545	0.001123	5.1787	4.786	5.3917	5.1309	5.3895	4.1982	4.3084	4.3582	4.4928	4.0531
neg_8853	Batatasin IV	metab_16405	yes	C10247	neg	60347-67-3	487.216	2.26802	2M-H	C15H16O3	0	63.9	HMDB0032641;LMPK13090032	-	-	-	-	-	Phenylpropanoids and polyketides	Stilbenes	Not Available	0	63.9	-	-	2.2322	2.1646	1.997e-05	0.0002605	5.4778	5.154	5.7482	5.6728	5.7281	4.1739	4.3807	4.6058	4.3447	4.1741
neg_9074	Adenosine 3'-monophosphate	metab_16643	yes	C01367	neg	84-21-9	346.056	1.88347	M-H	C10H14N5O7P	86.6	0	HMDB0003540	-	-	map01100;map00230	Metabolism;Metabolism	Global and overview maps;Nucleotide metabolism	Nucleosides, nucleotides, and analogues	Ribonucleoside 3''-phosphates	Not Available	86.6	0	Metabolic pathways;Purine metabolism	Metabolic pathways;Purine metabolism	1.3645	1.3337	0.004532	0.01394	3.9171	3.6503	3.8012	3.1302	3.8075	3.1198	3.129	3.1208	3.1052	3.1108
neg_9303	3-Methyl-2-benzothiazolone hydrazone	metab_16887	yes	-	neg	-	214.021	1.55618	M+Cl	C8H9N3S	0	31.9	HMDB0244395	-	-	-	-	-	Organoheterocyclic compounds	Benzothiazoles	Not Available	0	31.9	-	-	1.3176	1.2775	0.001363	0.005561	6.0918	6.1478	6.1938	6.1341	6.0949	5.4408	5.7864	5.8185	5.4153	5.8503
neg_967	Sisomicin sulfate	metab_17251	yes	-	neg	-	492.267	4.72515	M+K-2H, M+FA-H	C19H37N5O7	0	38.2	HMDB0242632	-	-	-	-	-	Not Available	Not Available	Not Available	0	38.2	-	-	1.2341	1.2381	0.008497	0.02223	5.0143	5.006	5.5943	5.0949	5.5368	4.6809	4.7675	4.85	4.855	4.7664
pos_1120	4-Hydroxy Triamterene	metab_133	yes	-	pos	-	302.134	1.2007	M+H-H2O, M+CH3OH+H	C12H11N7O	0	34.1	HMDB0246440	-	-	-	-	-	Organoheterocyclic compounds	Pteridines and derivatives	Not Available	0	34.1	-	-	1.8271	1.7924	0.002539	0.01523	5.7508	5.3027	5.823	5.7673	5.816	5.2999	5.1047	5.1967	5.3199	5.2543
pos_1485	(-)-Slaframine	metab_528	yes	C06185	pos	20084-93-9	216.17	0.8022	M+NH4	C10H18N2O2	0	47.9	HMDB0243523	-	-	map01110;map00960;map01064	Metabolism;Metabolism;Metabolism	Global and overview maps;Biosynthesis of other secondary metabolites;Chemical structure transformation maps	Organoheterocyclic compounds	Indolizidines	Not Available	0	47.9	Biosynthesis of secondary metabolites;Tropane, piperidine and pyridine alkaloid biosynthesis;Biosynthesis of alkaloids derived from ornithine, lysine and nicotinic acid	Biosynthesis of secondary metabolites;Tropane, piperidine and pyridine alkaloid biosynthesis;Biosynthesis of alkaloids derived from ornithine, lysine and nicotinic acid	1.4143	1.3953	0.006391	0.03069	5.1094	4.9995	4.9213	5.0791	5.0911	4.9376	4.6072	4.8225	4.8198	4.5624
pos_1683	Dmg-mino	metab_736	yes	C12011	pos	151922-16-6	558.251	1.6882	M+H	C27H35N5O8	0	43.4	HMDB0251539;LMPK07000009	-	-	-	-	-	Phenylpropanoids and polyketides	Tetracyclines	Not Available	0	43.4	-	-	1.935	1.884	0.005536	0.02781	5.2253	4.7812	5.1637	4.797	4.675	4.2788	4.286	4.2915	4.7409	4.3766
pos_1806	Janthitrem B	metab_870	yes	C20600	pos	73561-90-7	315.664	1.85187	M+2Na	C37H47NO5	0	31.7	HMDB0030528	-	-	-	-	-	Organoheterocyclic compounds	Naphthopyrans	Not Available	0	31.7	-	-	1.2591	1.2402	3.544e-05	0.0009347	5.3446	5.339	5.3274	5.3131	5.4042	5.5883	5.5508	5.5044	5.5651	5.4952
pos_197	Dihydroactinidiolide	metab_1042	yes	-	pos	15356-74-8	181.122	5.23607	M+H-H2O, M+H, M+H-2H2O	C11H16O2	72	0	HMDB0035240	-	-	-	-	-	Organoheterocyclic compounds	Benzofurans	Not Available	72	0	-	-	2.6115	2.5718	5.521e-07	3.921e-05	5.2605	5.3131	5.2539	5.3117	5.3123	4.4819	4.2759	4.5673	4.5188	4.5751
pos_2063	PA(PGJ2/12:0)	metab_1142	yes	-	pos	-	347.192	2.2094	M+H+Na	C35H59O10P	0	39	HMDB0262779	-	-	-	-	-	Not Available	Not Available	Not Available	0	39	-	-	2.7208	2.6737	0.0002612	0.004298	5.5599	4.9111	5.6384	5.5087	5.6449	4.3818	4.6348	4.3387	4.5458	4.6529
pos_2109	PG(PGE2/18:3(9Z,12Z,15Z))	metab_1192	yes	-	pos	-	432.24	2.28742	M+H+Na	C44H73O13P	0	57.3	HMDB0269412	-	-	-	-	-	Not Available	Not Available	Not Available	0	57.3	-	-	1.7379	1.7205	0.007559	0.03489	5.6504	5.364	5.7567	5.6765	5.7303	5.0752	4.8863	5.3535	5.1526	5.4795
pos_2110	CDP-DG(PGD2/i-19:0)	metab_1194	yes	-	pos	-	568.764	2.28742	M+2Na	C51H87N3O18P2	0	45.4	HMDB0294013	-	-	-	-	-	Not Available	Not Available	Not Available	0	45.4	-	-	2.7197	2.6789	3.838e-09	8.097e-07	5.481	5.4737	5.4137	5.4042	5.5315	6.3815	6.2641	6.3203	6.3662	6.2945
pos_2112	SENECIPHYLLINE	metab_1196	yes	C10391	pos	480-81-9	730.335	2.28742	2M+ACN+Na	C18H23NO5	0	55.8	HMDB0258231	-	-	-	-	-	Alkaloids and derivatives	Not Available	Not Available	0	55.8	-	-	1.7889	1.7524	0.0004671	0.004298	5.672	5.6388	5.711	5.7017	5.6292	5.2757	5.0242	5.3202	5.4561	5.2259
pos_2167	PG(18:1(12Z)-2OH(9,10)/a-13:0)	metab_1255	yes	-	pos	-	392.221	2.38105	M+2Na	C37H71O12P	0	45.4	HMDB0270585	-	-	-	-	-	Not Available	Not Available	Not Available	0	45.4	-	-	1.1262	1.1129	0.00904	0.03988	5.1873	5.2448	5.13	5.2639	5.2313	4.8601	4.9381	5.1214	5.1044	5.0686
pos_2301	CDP-DG(20:2(11Z,14Z)/22:6(4Z,7Z,11E,13Z,15E,19Z)-2OH(10S,17))	metab_1399	yes	-	pos	-	555.779	2.61487	M+2H	C54H85N3O17P2	0	30.5	HMDB0291887	-	-	-	-	-	Not Available	Not Available	Not Available	0	30.5	-	-	2.6662	2.6276	8.639e-07	5.443e-05	4.6198	4.7224	4.792	4.9248	4.6348	5.6085	5.5237	5.5916	5.6729	5.5251
pos_2309	PIP(6 keto-PGF1alpha/18:1(11Z))	metab_1407	yes	-	pos	-	516.262	2.6305	M+2H	C47H84O20P2	0	65.1	HMDB0278859	-	-	-	-	-	Not Available	Not Available	Not Available	0	65.1	-	-	1.4771	1.4406	0.04159	0.1274	4.5079	4.2509	4.881	4.8005	4.101	4.0579	4.068	4.2964	4.1346	4.0755
pos_2398	Janthitrem E	metab_1505	yes	-	pos	90986-50-8	626.35	2.81802	M+Na	C37H49NO6	0	67.9	HMDB0030529	-	-	-	-	-	Organoheterocyclic compounds	Naphthopyrans	Not Available	0	67.9	-	-	2.3781	2.3439	3.995e-06	0.0001726	4.9426	5.0902	5.1659	5.1951	4.9448	4.3531	4.3604	4.3646	4.51	4.3708
pos_2499	5-(Hydroxymethyl)piperidine-3,4-diol	metab_1615	yes	-	pos	-	317.17	3.02095	2M+Na	C6H13NO3	0	37.3	HMDB0246730	-	-	-	-	-	Organoheterocyclic compounds	Piperidines	Not Available	0	37.3	-	-	2.3378	2.3176	0.001211	0.008595	4.8965	4.6675	4.9928	4.6702	5.2599	3.8983	4.3434	4.2971	3.9143	4.3367
pos_2505	Cibinetide	metab_1623	yes	-	pos	-	640.293	3.02877	M+H+Na	C51H84N16O21	0	44.8	HMDB0250230	-	-	-	-	-	Organic Polymers	Polypeptides	Not Available	0	44.8	-	-	2.112	2.0778	4.198e-07	3.137e-05	6.7949	6.7744	6.8061	6.7729	6.7639	6.1674	6.2445	6.3663	6.2022	6.2898
pos_2514	5'-Deoxy-5'-fluorouridine	metab_1632	yes	C12739	pos	-	229.064	3.052	M+H-H2O	C9H11FN2O5	0	56.7	HMDB0246881;HMDB0060406	-	-	map00983	Metabolism	Xenobiotics biodegradation and metabolism	Nucleosides, nucleotides, and analogues	5''-deoxyribonucleosides	Not Available	0	56.7	Drug metabolism - other enzymes	Drug metabolism - other enzymes	1.1114	1.0931	2.007e-06	0.0001043	6.215	6.2186	6.1825	6.2075	6.201	6.3427	6.3319	6.3808	6.3733	6.3325
pos_2617	3-Pyridinecarboximidamide, N-(2-hydroxy-3-(1-piperidinyl)propoxy)-	metab_1740	yes	-	pos	-	296.206	3.40243	M+NH4	C14H22N4O2	0	45.2	HMDB0249173	-	-	-	-	-	Organoheterocyclic compounds	Pyridines and derivatives	Not Available	0	45.2	-	-	1.1604	1.1374	0.007849	0.03572	5.0433	4.8185	5.0642	4.9784	5.0427	4.8938	4.6921	4.8129	4.7592	4.8041
pos_3331	2-Phenylethanethiol	metab_2496	yes	-	pos	4410-99-5	180.084	5.65275	M+ACN+H	C8H10S	0	51.6	HMDB0032637	-	-	-	-	-	Benzenoids	Benzene and substituted derivatives	Not Available	0	51.6	-	-	2.5824	2.5473	5.646e-07	3.932e-05	5.5778	5.597	5.5567	5.7031	5.6274	4.9886	4.7368	4.8105	4.716	4.8637
pos_3339	N-Nervonoyl Glutamine	metab_2504	yes	-	pos	-	477.405	5.67623	M+H-H2O	C29H54N2O4	0	35.5	HMDB0242089	-	-	-	-	-	Not Available	Not Available	Not Available	0	35.5	-	-	2.5328	2.5814	0.04293	0.1302	4.2538	5.5359	3.8342	4.1819	4.3571	6.0136	6.3907	4.7824	6.143	4.5527
pos_4519	Daucol	metab_3799	yes	C09652	pos	887-08-1	261.184	5.83243	M+Na	C15H26O2	0	71.8	HMDB0035287	-	-	-	-	-	Organoheterocyclic compounds	Oxanes	Not Available	0	71.8	-	-	1.0588	1.0384	0.000319	0.004298	5.4143	5.3689	5.4424	5.3796	5.3802	5.2607	5.2278	5.2858	5.1929	5.3007
pos_4728	Oxymorphone	metab_4027	yes	C08019	pos	76-41-5	302.142	5.69188	M+H	C17H19NO4	0	40.4	HMDB0015323;PW_C009605	-	-	-	-	-	Benzenoids	Phenanthrenes and derivatives	Not Available	0	40.4	-	-	1.1342	1.1128	0.001521	0.0101	4.9959	4.9197	4.9297	4.9409	4.9599	4.8795	4.7275	4.8328	4.744	4.6987
pos_4914	Ligustilide	metab_4230	yes	C16987	pos	4431-01-0	191.106	5.23607	M+H	C12H14O2	0	40.8	HMDB0034277;HMDB0259970;MJDBOTE0001288	-	-	-	-	-	Organoheterocyclic compounds	Isobenzofurans	Not Available	0	40.8	-	-	2.3833	2.3523	3.332e-07	2.779e-05	5.2614	5.3207	5.2152	5.2672	5.2591	4.6089	4.4414	4.6333	4.6799	4.6121
pos_5882	CDP-DG(PGF2alpha/20:1(11Z))	metab_5233	yes	-	pos	-	575.772	2.95065	M+2Na	C52H89N3O18P2	0	63.6	HMDB0291730	-	-	-	-	-	Not Available	Not Available	Not Available	0	63.6	-	-	2.0669	2.0382	1.281e-09	3.403e-07	5.8861	5.8672	5.886	5.9514	5.8916	6.3948	6.382	6.4116	6.4104	6.3755
pos_5931	17-Aminogeldanamycin	metab_5286	yes	-	pos	-	528.266	2.88032	M+H-H2O	C28H39N3O8	0	80.8	HMDB0259661	-	-	-	-	-	Phenylpropanoids and polyketides	Macrolactams	Not Available	0	80.8	-	-	2.8345	2.7905	2.571e-06	0.0001272	6.5049	6.4938	6.4762	6.4955	6.5292	5.2239	5.5454	5.6007	5.6854	5.6328
pos_6001	PA(20:4(5Z,8Z,11Z,14Z)-OH(20)/13:0)	metab_5361	yes	-	pos	-	358.197	2.7712	M+2Na	C36H63O9P	0	30.9	HMDB0262855	-	-	-	-	-	Not Available	Not Available	Not Available	0	30.9	-	-	1.2452	1.22	0.006254	0.0303	4.8953	4.8852	4.9295	4.8659	5.0847	4.6885	4.5316	4.7837	4.7848	4.7426
pos_6250	AB-MECA	metab_5633	yes	-	pos	-	417.197	2.42017	M+NH4	C18H21N7O4	0	62.1	HMDB0242721	-	-	-	-	-	Nucleosides, nucleotides, and analogues	Purine nucleosides	Not Available	0	62.1	-	-	1.0133	0.9924	9.95e-05	0.002045	6.1407	6.07	6.1563	6.1295	6.1195	6.0195	5.9905	6.0117	5.9601	5.9967
pos_6280	7-Acetyllycopsamine	metab_5666	yes	C16751	pos	-	405.197	2.38105	M+ACN+Na	C17H27NO6	0	41.1	HMDB0302356	-	-	-	-	-	Alkaloids and derivatives	Not Available	Not Available	0	41.1	-	-	2.5399	2.4793	0.001553	0.01022	5.323	5.0566	5.7485	5.45	5.7439	4.9814	4.6245	4.5478	4.6697	4.1767
pos_6293	PIP(PGF1alpha/18:0)	metab_5680	yes	-	pos	-	532.259	2.3655	M+2Na	C47H88O19P2	0	30.6	HMDB0278823	-	-	-	-	-	Not Available	Not Available	Not Available	0	30.6	-	-	1.8698	1.8368	1.095e-05	0.0003813	6.0882	6.005	6.1841	6.0755	6.2197	5.642	5.6809	5.7414	5.657	5.736
pos_6309	N-Docosahexaenoyl Proline	metab_5698	yes	-	pos	-	470.26	2.34205	M+2Na-H	C27H39NO3	0	32.6	HMDB0242020	-	-	-	-	-	Not Available	Not Available	Not Available	0	32.6	-	-	1.7897	1.7616	2.124e-07	1.979e-05	5.9529	5.9781	5.9711	5.9654	6.0127	5.527	5.5845	5.6283	5.6503	5.5999
pos_6344	Methyldopa	metab_5737	yes	C07194	pos	555-30-6	253.118	2.30293	M+ACN+H	C10H13NO4	0	47.7	HMDB0251525;HMDB0011754;MJDBOTE0001405	-	-	-	-	-	Phenylpropanoids and polyketides	Phenylpropanoic acids	Not Available	0	47.7	-	-	1.2839	1.2614	0.0006593	0.005243	5.0827	5.2203	5.0387	5.1348	5.0236	5.2714	5.2959	5.3402	5.3713	5.2972
pos_6368	CDP-DG(18:2(10E,12Z)+=O(9)/i-17:0)	metab_5761	yes	-	pos	-	525.746	2.2718	M+2Na	C47H81N3O16P2	0	36.5	HMDB0293829	-	-	-	-	-	Not Available	Not Available	Not Available	0	36.5	-	-	1.1737	1.1534	0.0006267	0.005052	5.8495	5.8912	5.8577	5.8422	5.7605	5.9757	6.0704	5.957	6.0857	6.0153
pos_6450	Morph	metab_5852	yes	C01516	pos	57-27-2	474.255	2.17037	2M+NH4	C10H16N2O4	0	53	HMDB0014440;HMDB0254890	-	-	map01100;map01110;map00982;map00950;map04080;map01063	Metabolism;Metabolism;Metabolism;Metabolism;Environmental Information Processing;Metabolism	Global and overview maps;Global and overview maps;Xenobiotics biodegradation and metabolism;Biosynthesis of other secondary metabolites;Signaling molecules and interaction;Chemical structure transformation maps	Alkaloids and derivatives	Morphinans	Not Available	0	53	Metabolic pathways;Biosynthesis of secondary metabolites;Drug metabolism - cytochrome P450;Isoquinoline alkaloid biosynthesis;Neuroactive ligand-receptor interaction;Biosynthesis of alkaloids derived from shikimate pathway	Metabolic pathways;Biosynthesis of secondary metabolites;Drug metabolism - cytochrome P450;Isoquinoline alkaloid biosynthesis;Neuroactive ligand-receptor interaction;Biosynthesis of alkaloids derived from shikimate pathway	1.5152	1.4926	3.87e-06	0.0001703	5.2834	5.2895	5.2791	5.3134	5.2344	5.5046	5.5171	5.5648	5.6243	5.5674
pos_6547	PIP(PGJ2/22:2(13Z,16Z))	metab_5953	yes	-	pos	-	525.271	2.04588	M+2H	C51H86O18P2	0	69.2	HMDB0280212	-	-	-	-	-	Not Available	Not Available	Not Available	0	69.2	-	-	1.952	1.9133	0.01053	0.04505	5.7054	5.5445	5.7726	5.7631	5.6917	4.9863	4.5518	5.4658	5.1326	5.4532
pos_6593	1H-Imidazole-1-ethanol, alpha-2-naphthalenyl-	metab_5998	yes	-	pos	-	499.214	1.99923	2M+Na	C15H14N2O	0	31.6	HMDB0255423	-	-	-	-	-	Benzenoids	Naphthalenes	Not Available	0	31.6	-	-	2.8704	2.8307	1.213e-05	0.0004047	5.3731	5.392	5.4046	5.4102	5.2782	4.1298	4.496	4.4034	4.1458	4.6621
pos_6777	PA(PGJ2/i-12:0)	metab_6187	yes	-	pos	-	347.19	1.89077	M+H+Na	C35H59O10P	0	53.3	HMDB0267348	-	-	-	-	-	Not Available	Not Available	Not Available	0	53.3	-	-	2.0703	2.0197	0.0009601	0.007137	5.3938	5.0965	5.3821	5.4482	5.4651	4.8984	4.4685	4.8455	4.9841	4.7767
pos_7166	Ethoxybenzyl diethylenetriamine	metab_6607	yes	-	pos	-	279.218	1.2007	M+ACN+H	C13H23N3O	0	39.8	HMDB0252022	-	-	-	-	-	Benzenoids	Benzene and substituted derivatives	Not Available	0	39.8	-	-	1.0128	1.0306	0.04186	0.1279	5.1553	5.0985	4.9975	5.1081	4.9058	5.3596	5.1376	5.1218	5.4266	5.1587
pos_7209	1-Isothiocyanato-7-(methylthio)heptane	metab_6654	yes	-	pos	4430-38-0	445.121	1.1069	2M+K	C9H17NS2	0	40.5	HMDB0038440	-	-	-	-	-	Organosulfur compounds	Isothiocyanates	Not Available	0	40.5	-	-	1.2222	1.2013	2.498e-05	0.0007054	6.0622	6.0461	5.9749	6.0496	6.0321	6.2584	6.1853	6.2156	6.2372	6.183
pos_7276	4-Guanidinobutanoic Acid	metab_6721	yes	C01035	pos	463-00-3;500-65-2	146.092	0.934883	M+H	C5H11N3O2	54.3	0	HMDB0031842;HMDB0003464;MJDBOTE0001114	-	-	map01100;map00330	Metabolism;Metabolism	Global and overview maps;Amino acid metabolism	Phenylpropanoids and polyketides	Stilbenes	Not Available	54.3	0	Metabolic pathways;Arginine and proline metabolism	Metabolic pathways;Arginine and proline metabolism	1.051	1.0504	0.01041	0.0447	6.4182	6.4051	6.3703	6.4414	6.4109	6.4087	6.1783	6.2183	6.2833	6.1288
pos_7486	Pyrroline	metab_6933	yes	C19907	pos	109-97-7	70.0656	0.607633	M+H	C4H7N	0	44	HMDB0035924;HMDB0245392	-	-	-	-	-	Organoheterocyclic compounds	Heteroaromatic compounds	Not Available	0	44	-	-	1.6487	1.6065	0.02646	0.09107	4.0676	4.0531	4.8747	4.1691	4.3787	3.9795	3.8258	3.6824	4.0064	3.8227
neg_2932	N-NITROSODIETHANOLAMINE	metab_9975	yes	C19278	neg	1116-54-7	401.204	3.24013	3M-H	C4H10N2O3	0	49.2	HMDB0255203	-	-	-	-	-	Organic nitrogen compounds	Organonitrogen compounds	Organic nitroso compounds	0	49.2	-	-	1.2525	1.2164	0.0001732	0.001215	4.9945	4.7398	4.9967	4.9623	5.0482	4.5118	4.4721	4.6228	4.5985	4.5443
neg_2606	1-Octanesulfonic acid	metab_9616	yes	-	neg	-	387.189	2.86292	2M-H	C8H18O3S	0	45.2	HMDB0243978	-	-	-	-	-	Organic acids and derivatives	Organic sulfonic acids and derivatives	Organosulfonic acids and derivatives	0	45.2	-	-	1.272	1.2759	0.003808	0.01228	5.0539	4.7938	5.3864	5.1155	5.4194	4.7078	4.6607	4.7172	4.6707	4.682
neg_2663	2-({4-[5-(3,4-Diethoxyphenyl)-1,2,4-oxadiazol-3-yl]-2,3-dihydro-1H-inden-1-yl}amino)ethan-1-ol	metab_9678	yes	-	neg	-	454.194	2.92678	M+FA-H	C23H27N3O4	0	41.5	HMDB0244335	-	-	-	-	-	Organoheterocyclic compounds	Azoles	Oxadiazoles	0	41.5	-	-	1.2148	1.2026	5.161e-07	1.795e-05	4.9915	5.0516	5.0107	5.0209	4.948	4.6778	4.6111	4.701	4.6181	4.6591
neg_7816	Cerulenin	metab_15269	yes	C12058	neg	17397-89-6	445.23	3.40113	2M-H	C12H17NO3	0	68.1	HMDB0015168;LMFA08010013	-	-	-	-	-	Organoheterocyclic compounds	Epoxides	Oxirane carboxylic acids and derivatives	0	68.1	-	-	1.8377	1.8273	0.002102	0.0077	4.4811	3.7767	4.8877	4.4745	4.9264	3.5237	3.533	3.5248	3.5324	3.7297
pos_5701	3-keto Fusidic acid	metab_5048	yes	-	pos	-	548.363	3.37898	M+NH4	C31H46O7	0	67.8	HMDB0060745	-	-	-	-	-	Lipids and lipid-like molecules	Steroids and steroid derivatives	Oxosteroids	0	67.8	-	-	1.4795	1.5612	0.01424	0.05728	5.0076	4.4706	5.0284	4.904	4.832	5.1544	5.2633	5.3301	5.1806	5.0534
neg_2696	Thapsigargin	metab_9714	yes	C09561	neg	67526-95-8	671.301	2.96727	M+Na-2H	C34H50O12	0	63.4	LMPR0103410001;HMDB0258957	-	-	-	-	-	Organic acids and derivatives	Carboxylic acids and derivatives	Pentacarboxylic acids and derivatives	0	63.4	-	-	1.1587	1.1369	3.403e-06	7.419e-05	5.6402	5.6847	5.7524	5.749	5.6364	5.371	5.385	5.3772	5.3957	5.3177
pos_2353	4-(1-Hydroxy-2-{[1-(4-hydroxyphenyl)propan-2-yl]amino}ethyl)benzene-1,2-diol	metab_1456	yes	-	pos	-	624.334	2.7244	2M+NH4	C17H21NO4	0	44.6	HMDB0245699	-	-	-	-	-	Benzenoids	Benzene and substituted derivatives	Phenethylamines	0	44.6	-	-	2.6394	2.5998	1.32e-05	0.0004343	5.1149	5.189	5.2354	5.2584	5.2209	4.4177	4.2129	4.2172	4.6724	4.3016
pos_5864	Salmefamol	metab_5214	yes	C11771	pos	18910-65-1	354.165	2.97402	M+Na	C19H25NO4	0	35.4	HMDB0257468	-	-	-	-	-	Benzenoids	Benzene and substituted derivatives	Phenethylamines	0	35.4	-	-	1.0378	1.0199	0.0008108	0.00622	5.3841	5.4181	5.2957	5.4072	5.3557	5.5106	5.5271	5.4935	5.5668	5.4716
pos_6712	Tyramine	metab_6118	yes	C00483	pos	51-67-2	179.118	1.91418	M+ACN+H	C8H11NO	71.2	0	PW_C000210;HMDB0000306;MJDBOTE0000392	Peptides	Amines	map01100;map00950;map01110;map01240;map04974;map00680;map04080;map00350;map01063;map01060	Metabolism;Metabolism;Metabolism;Metabolism;Organismal Systems;Metabolism;Environmental Information Processing;Metabolism;Metabolism;Metabolism	Global and overview maps;Biosynthesis of other secondary metabolites;Global and overview maps;Global and overview maps;Digestive system;Energy metabolism;Signaling molecules and interaction;Amino acid metabolism;Chemical structure transformation maps;Chemical structure transformation maps	Benzenoids	Benzene and substituted derivatives	Phenethylamines	71.2	0	Metabolic pathways;Isoquinoline alkaloid biosynthesis;Biosynthesis of secondary metabolites;Biosynthesis of cofactors;Protein digestion and absorption;Methane metabolism;Neuroactive ligand-receptor interaction;Tyrosine metabolism;Biosynthesis of alkaloids derived from shikimate pathway;Biosynthesis of plant secondary metabolites	Metabolic pathways;Isoquinoline alkaloid biosynthesis;Biosynthesis of secondary metabolites;Biosynthesis of cofactors;Protein digestion and absorption;Methane metabolism;Neuroactive ligand-receptor interaction;Tyrosine metabolism;Biosynthesis of alkaloids derived from shikimate pathway;Biosynthesis of plant secondary metabolites	1.5396	1.519	0.007032	0.03299	5.0212	4.7251	5.0739	4.7388	5.1656	4.6409	4.5211	4.7025	4.6005	4.5281
pos_2127	Paroxetine	metab_1212	yes	C07415	pos	61869-08-7	330.148	2.31075	M+H	C19H20FNO3	53.7	0	HMDB0014853	-	-	-	-	-	Organoheterocyclic compounds	Piperidines	Phenylpiperidines	53.7	0	-	-	1.0545	1.0361	0.002886	0.01681	5.2377	5.2947	5.1977	5.3033	5.2488	5.4366	5.4651	5.4023	5.4583	5.2949
neg_6816	Suloctidil	metab_14183	yes	-	neg	-	372.214	4.5174	M+Cl	C20H35NOS	0	37.3	HMDB0242578	-	-	-	-	-	Benzenoids	Benzene and substituted derivatives	Phenylpropanes	0	37.3	-	-	1.4771	1.482	0.006212	0.01758	3.8214	3.2198	4.0538	4.0814	4.2016	3.2287	3.238	3.2298	3.2382	3.2197
neg_2023	8H-Purin-8-one, 7-(2-butynyl)-7,9-dihydro-9-(6-methoxy-3-pyridinyl)-6-(1-piperazinyl)-	metab_8982	yes	-	neg	-	400.147	1.85948	M+Na-2H	C19H21N7O2	0	33.9	HMDB0259448	-	-	-	-	-	Organoheterocyclic compounds	Diazinanes	Piperazines	0	33.9	-	-	2.5505	2.4766	6.571e-06	0.0001216	4.8514	4.1713	4.9878	4.8639	4.9799	3.1945	3.2038	3.1956	3.1799	3.1855
neg_7196	Preladenant	metab_14591	yes	-	neg	-	548.236	4.06103	M+FA-H	C25H29N9O3	0	38.2	HMDB0256760	-	-	-	-	-	Organoheterocyclic compounds	Diazinanes	Piperazines	0	38.2	-	-	2.2288	2.167	2.439e-05	0.0002998	4.802	4.3647	4.9453	4.8235	5.0067	3.6932	3.7967	3.5798	3.3528	3.3862
neg_7199	Selpercatinib	metab_14594	yes	-	neg	-	506.228	4.05303	M-H2O-H	C29H31N7O3	0	57	HMDB0304865	-	-	-	-	-	Organoheterocyclic compounds	Diazinanes	Piperazines	0	57	-	-	2.3172	2.2707	7.697e-08	4.123e-06	5.7008	5.5373	5.6531	5.6373	5.6662	4.304	4.1628	4.4056	4.5359	4.4317
pos_6172	Avapritinib	metab_5549	yes	-	pos	-	531.276	2.52915	M+CH3OH+H	C26H27FN10	0	39.2	HMDB0304850	-	-	-	-	-	Organoheterocyclic compounds	Diazinanes	Piperazines	0	39.2	-	-	1.0286	1.0475	0.04659	0.1391	5.488	5.511	5.6273	5.5481	5.7224	5.1226	5.4134	5.5556	5.427	5.403
neg_8179	Cycloheximide	metab_15666	yes	C06685	neg	66-81-9	302.136	3.05563	M+Na-2H	C15H23NO4	0	30.4	HMDB0250657	Antibiotics	Others	-	-	-	Organoheterocyclic compounds	Piperidines	Piperidinones	0	30.4	-	-	1.6252	1.6388	0.006777	0.01872	5.6527	4.6169	5.7537	5.5111	5.7405	4.6634	4.6066	4.7745	4.6468	4.6779
neg_2442	Xymedon	metab_9439	yes	-	neg	-	213.088	2.62153	M+FA-H	C8H12N2O2	0	58.9	HMDB0244633;HMDB0259943	-	-	-	-	-	Lipids and lipid-like molecules	Steroids and steroid derivatives	Pregnane steroids	0	58.9	-	-	1.0383	1.0182	0.001638	0.006366	5.1027	4.7878	5.0743	4.9941	5.1044	4.7329	4.6924	4.7776	4.7346	4.6549
neg_7682	(6S)-Tetrahydro-L-biopterin	metab_15124	yes	-	neg	-	481.23	3.54583	2M-H	C9H15N5O3	0	61.4	HMDB0257928	-	-	-	-	-	Organoheterocyclic compounds	Pteridines and derivatives	Pterins and derivatives	0	61.4	-	-	1.6838	1.645	6.253e-08	3.594e-06	4.3682	4.4573	4.3931	4.4763	4.3266	5.1309	5.0706	5.0627	5.1167	5.0058
neg_7492	Dihydrobiopterin	metab_17605	yes	C02953	neg	6779-87-9	523.204	3.73698	2M+FA-H	C9H13N5O3	0	65.2	HMDB0000038;PW_C000027	-	-	map01100;map00790;map01240	Metabolism;Metabolism;Metabolism	Global and overview maps;Metabolism of cofactors and vitamins;Global and overview maps	Organoheterocyclic compounds	Pteridines and derivatives	Pterins and derivatives	0	65.2	Metabolic pathways;Folate biosynthesis;Biosynthesis of cofactors	Metabolic pathways;Folate biosynthesis;Biosynthesis of cofactors	2.1257	2.0753	3.677e-09	3.592e-07	6.1786	6.0359	6.1541	6.1538	6.1536	4.9938	5.0374	5.1547	5.0486	5.1286
neg_2535	Puromycin	metab_9538	yes	C01610	neg	53-79-2	508.168	2.7579	M+K-2H	C22H29N7O5	0	65.5	HMDB0256926	-	-	map01100;map01110;map00998	Metabolism;Metabolism;Metabolism	Global and overview maps;Global and overview maps;Biosynthesis of other secondary metabolites	Nucleosides, nucleotides, and analogues	Purine nucleosides	Purine 3''-deoxyribonucleosides	0	65.5	Metabolic pathways;Biosynthesis of secondary metabolites;Biosynthesis of various antibiotics	Metabolic pathways;Biosynthesis of secondary metabolites;Biosynthesis of various antibiotics	1.3139	1.3476	0.04045	0.07755	3.2274	3.2146	4.2784	4.3064	4.1839	3.2235	3.2328	3.2246	3.2089	3.2145
neg_9253	Deoxyguanylic Acid	metab_16833	yes	C00362	neg	902-04-5	346.056	1.69913	M-H	C10H14N5O7P	48.2	0	HMDB0001044	Nucleic acids	Nucleotides	map01100;map01232;map00230	Metabolism;Metabolism;Metabolism	Global and overview maps;Global and overview maps;Nucleotide metabolism	Nucleosides, nucleotides, and analogues	Purine nucleotides	Purine deoxyribonucleotides	48.2	0	Metabolic pathways;Nucleotide metabolism;Purine metabolism	Metabolic pathways;Nucleotide metabolism;Purine metabolism	1.5177	1.4731	0.003115	0.01049	4.2591	4.2063	4.2077	4.1069	4.1547	3.1717	3.8301	3.6944	3.1571	3.828
neg_1903	8-Hydroxyguanine	metab_8856	yes	C20155	neg	5614-64-2	166.036	1.41392	M-H	C5H5N5O2	0	39.7	HMDB0002032	-	-	-	-	-	Organoheterocyclic compounds	Imidazopyrimidines	Purines and purine derivatives	0	39.7	-	-	1.7526	1.7341	0.0004215	0.002327	4.1797	4.1259	4.506	3.8981	3.7294	5.0139	4.8924	4.95	4.736	4.8815
neg_1929	Oxypurinol	metab_8880	yes	C07599	neg	2465-59-0	151.025	1.55618	M-H	C5H4N4O2	86.5	0	HMDB0000786	-	-	-	-	-	Organoheterocyclic compounds	Imidazopyrimidines	Purines and purine derivatives	86.5	0	-	-	1.2499	1.2187	1.24e-06	3.553e-05	7.1984	7.2301	7.2942	7.2355	7.2075	6.8164	6.8285	6.9236	6.8185	6.9105
neg_2011	1-Methylguanine	metab_8970	yes	C04152	neg	938-85-2	164.057	1.82747	M-H	C6H7N5O	73.6	0	HMDB0003282	-	-	-	-	-	Organoheterocyclic compounds	Imidazopyrimidines	Purines and purine derivatives	73.6	0	-	-	1.907	1.8567	1.805e-05	0.0002432	4.1851	4.1301	4.1516	4.1326	4.1661	3.2812	3.1401	3.5271	2.9673	3.4017
neg_3772	Islatravir	metab_10892	yes	-	neg	-	328.062	4.33305	M+Cl	C12H12FN5O3	0	33.5	HMDB0253596	-	-	-	-	-	Organoheterocyclic compounds	Imidazopyrimidines	Purines and purine derivatives	0	33.5	-	-	1.1419	1.1089	0.0001904	0.001292	4.9057	4.7385	4.94	4.7207	4.6955	4.4715	4.4807	4.4726	4.4569	4.4625
neg_9396	Hypoxanthine	metab_16978	yes	C00262	neg	68-94-0	135.03	1.23982	M-H	C5H4N4O	96.8	0	PW_C000102;HMDB0000157	-	-	map01100;map01232;map00230	Metabolism;Metabolism;Metabolism	Global and overview maps;Global and overview maps;Nucleotide metabolism	Organoheterocyclic compounds	Imidazopyrimidines	Purines and purine derivatives	96.8	0	Metabolic pathways;Nucleotide metabolism;Purine metabolism	Metabolic pathways;Nucleotide metabolism;Purine metabolism	1.2264	1.1992	0.001032	0.00452	4.0907	4.3466	4.4977	4.3188	4.3297	4.8496	4.6573	4.6494	4.8119	4.624
pos_1785	6-Dimethylaminopurine	metab_846	yes	-	pos	938-55-6	164.093	1.8051	M+H	C7H9N5	54.1	0	HMDB0000473	-	-	-	-	-	Organoheterocyclic compounds	Imidazopyrimidines	Purines and purine derivatives	54.1	0	-	-	1.4857	1.499	0.02879	0.09701	3.5402	3.6424	3.7392	3.7584	3.1206	3.4766	3.0881	3.0924	3.0969	3.2067
pos_1875	Guanine	metab_946	yes	C00242	pos	73-40-5	152.057	1.91418	M+H	C5H5N5O	88.6	0	PW_C000086;HMDB0000132;MJDBOTE0000457	Nucleic acids	Bases	map01100;map01232;map00230	Metabolism;Metabolism;Metabolism	Global and overview maps;Global and overview maps;Nucleotide metabolism	Organoheterocyclic compounds	Imidazopyrimidines	Purines and purine derivatives	88.6	0	Metabolic pathways;Nucleotide metabolism;Purine metabolism	Metabolic pathways;Nucleotide metabolism;Purine metabolism	1.2081	1.2081	0.02737	0.09354	4.2056	3.9172	4.0198	3.9901	3.8827	4.2688	3.9909	4.3395	4.4419	4.2362
pos_2415	Aciclovir	metab_1525	yes	C06810	pos	59277-89-3	492.208	2.857	2M+ACN+H	C8H11N5O3	0	47.9	HMDB0014925;MJDBOTE0001429	-	-	map04976	Organismal Systems	Digestive system	Organoheterocyclic compounds	Imidazopyrimidines	Purines and purine derivatives	0	47.9	Bile secretion	Bile secretion	3.4843	3.4275	3.114e-07	2.659e-05	5.6094	5.5808	5.6129	5.6162	5.5893	4.0645	4.0717	4.5382	4.0804	4.0821
pos_2417	Kinetin	metab_1527	yes	C08272	pos	525-79-1	216.088	2.86475	M+H	C10H9N5O	83	0	HMDB0012245;MJDBZSJ0000125	-	-	-	-	-	Organoheterocyclic compounds	Imidazopyrimidines	Purines and purine derivatives	83	0	-	-	1.7369	1.7222	0.00344	0.0193	3.8835	3.9642	4.0685	3.9251	3.4693	3.4296	3.4369	3.4411	3.4456	3.4473
pos_7094	Xanthine	metab_6529	yes	C00385	pos	69-89-6	153.041	1.50273	M+H	C5H4N4O2	88.6	0	HMDB0000292;PW_C000198;MJDBOTE0000403	-	-	map01100;map01110;map00230;map01120;map00232;map01232;map01065;map01060	Metabolism;Metabolism;Metabolism;Metabolism;Metabolism;Metabolism;Metabolism;Metabolism	Global and overview maps;Global and overview maps;Nucleotide metabolism;Global and overview maps;Biosynthesis of other secondary metabolites;Global and overview maps;Chemical structure transformation maps;Chemical structure transformation maps	Organoheterocyclic compounds	Imidazopyrimidines	Purines and purine derivatives	88.6	0	Metabolic pathways;Biosynthesis of secondary metabolites;Purine metabolism;Microbial metabolism in diverse environments;Caffeine metabolism;Nucleotide metabolism;Biosynthesis of alkaloids derived from histidine and purine;Biosynthesis of plant secondary metabolites	Metabolic pathways;Biosynthesis of secondary metabolites;Purine metabolism;Microbial metabolism in diverse environments;Caffeine metabolism;Nucleotide metabolism;Biosynthesis of alkaloids derived from histidine and purine;Biosynthesis of plant secondary metabolites	1.641	1.6104	0.002	0.01259	6.7956	6.7022	6.8116	6.6918	6.6832	6.5394	6.1549	6.2914	6.5496	6.3391
pos_7059	7-Methylguanine	metab_7492	yes	C02242	pos	10030-78-1;578-76-7	166.072	1.65698	M+H	C6H7N5O	79.9	0	HMDB0006040;HMDB0000897	-	-	-	-	-	Organoheterocyclic compounds	Imidazopyrimidines	Purines and purine derivatives	79.9	0	-	-	3.1712	3.1237	1.046e-07	1.154e-05	5.6532	5.599	5.683	5.6917	5.6717	4.3587	4.6496	4.4117	4.339	4.6075
neg_9469	Nicotinic Acid	metab_17613	yes	C00253	neg	59-67-6;583-08-4	122.024	1.01622	M-H	C6H5NO2	74.8	0	PW_C001145;HMDB0001488;HMDB0003269;MJDBOTE0000774	Vitamins and cofactors	Vitamins	map01100;map01110;map01120;map00760;map00960;map01240;map05133;map01064;map01060	Metabolism;Metabolism;Metabolism;Metabolism;Metabolism;Metabolism;Human Diseases;Metabolism;Metabolism	Global and overview maps;Global and overview maps;Global and overview maps;Metabolism of cofactors and vitamins;Biosynthesis of other secondary metabolites;Global and overview maps;Infectious disease: bacterial;Chemical structure transformation maps;Chemical structure transformation maps	Organoheterocyclic compounds	Pyridines and derivatives	Pyridinecarboxylic acids and derivatives	74.8	0	Metabolic pathways;Biosynthesis of secondary metabolites;Microbial metabolism in diverse environments;Nicotinate and nicotinamide metabolism;Tropane, piperidine and pyridine alkaloid biosynthesis;Biosynthesis of cofactors;Pertussis;Biosynthesis of alkaloids derived from ornithine, lysine and nicotinic acid;Biosynthesis of plant secondary metabolites	Metabolic pathways;Biosynthesis of secondary metabolites;Microbial metabolism in diverse environments;Nicotinate and nicotinamide metabolism;Tropane, piperidine and pyridine alkaloid biosynthesis;Biosynthesis of cofactors;Pertussis;Biosynthesis of alkaloids derived from ornithine, lysine and nicotinic acid;Biosynthesis of plant secondary metabolites	1.0907	1.0816	1.116e-07	5.419e-06	5.231	5.2877	5.2603	5.2765	5.2774	5.0156	4.9873	4.9706	5.0012	4.9424
neg_2598	Uridine, 2'-deoxy-2'-fluoro-2'-methyl-, (2'R)-	metab_9606	yes	-	neg	-	305.081	2.84632	M+FA-H	C10H13FN2O5	0	45.5	HMDB0247529	-	-	-	-	-	Nucleosides, nucleotides, and analogues	Pyrimidine nucleosides	Pyrimidine 2''-deoxyribonucleosides	0	45.5	-	-	1.6864	1.715	0.02248	0.04781	4.5911	3.831	5.3297	4.5968	5.3144	3.4813	3.2879	3.7507	4.1001	4.3054
neg_2524	2,6-Diamino-4-hydroxy-5-N-methylformamidopyrimidine	metab_9526	yes	C04744	neg	77440-13-2	365.146	2.73388	2M-H	C6H9N5O2	0	39.2	HMDB0011657	-	-	-	-	-	Organoheterocyclic compounds	Diazines	Pyrimidines and pyrimidine derivatives	0	39.2	-	-	1.3813	1.3495	0.001635	0.006356	4.7643	4.2803	4.8147	4.7305	4.8022	4.28	4.0079	4.2419	4.1567	4.1047
neg_7855	AFN911	metab_15312	yes	-	neg	-	546.242	3.36123	M+Cl	C29H33N7O2	0	82.9	HMDB0013863	-	-	-	-	-	Organoheterocyclic compounds	Diazines	Pyrimidines and pyrimidine derivatives	0	82.9	-	-	3.2933	3.1999	1.467e-05	0.0002108	3.3993	3.412	4.0825	3.4034	4.1093	1.1597	0.7347	1.8757	0.6818	0.6863
pos_2318	Bucolome	metab_1417	yes	-	pos	-	596.34	2.64618	2M+ACN+Na	C14H22N2O3	0	35.4	HMDB0249422	-	-	-	-	-	Organoheterocyclic compounds	Diazines	Pyrimidines and pyrimidine derivatives	0	35.4	-	-	1.8021	1.7809	0.0005817	0.004764	5.483	5.5379	5.5761	5.5524	5.5304	5.2394	5.0019	4.9612	5.3466	5.0357
pos_254	Cytosine	metab_1657	yes	C00380	pos	71-30-7	112.051	0.599817	M+H, M+K, M+Na	C4H5N3O	57.9	0	HMDB0000630;MJDBOTE0000458	Nucleic acids	Bases	map00240;map01100;map01232	Metabolism;Metabolism;Metabolism	Nucleotide metabolism;Global and overview maps;Global and overview maps	Organoheterocyclic compounds	Diazines	Pyrimidines and pyrimidine derivatives	57.9	0	Pyrimidine metabolism;Metabolic pathways;Nucleotide metabolism	Pyrimidine metabolism;Metabolic pathways;Nucleotide metabolism	3.7428	3.6922	3.957e-06	0.000172	5.7283	5.7562	5.7127	5.7028	5.8292	4.4731	3.8164	3.8789	4.4065	3.8091
neg_6470	BATRACHOTOXIN	metab_13803	yes	C13750	neg	23509-16-2	573.271	5.16667	M+Cl	C31H42N2O6	0	31.4	HMDB0248882	-	-	-	-	-	Organoheterocyclic compounds	Pyrroles	Pyrrole carboxylic acids and derivatives	0	31.4	-	-	2.6933	2.6326	1.761e-08	1.294e-06	4.9361	4.6928	4.9369	5.1306	5.0374	3.3296	3.2221	3.2139	3.1982	3.2038
pos_135	Methyl 5-(hydroxymethyl)pyrrolidine-3-carboxylate	metab_384	yes	-	pos	-	341.171	2.01488	M+H, 2M+Na, M+CH3OH+H	C7H13NO3	0	36.6	HMDB0061678	-	-	-	-	-	Organoheterocyclic compounds	Pyrrolidines	Pyrrolidine carboxylic acids and derivatives	0	36.6	-	-	1.3198	1.2999	0.0002438	0.004067	5.6543	5.6604	5.5476	5.6287	5.5543	5.857	5.8018	5.8381	5.9089	5.7542
pos_820	N-Methylnicotinium	metab_7289	yes	-	pos	24554-05-0	219.174	5.66057	M+ACN+H, 2M+ACN+H	C11H17N2+	0	31.4	HMDB0001009	-	-	-	-	-	Organoheterocyclic compounds	Pyridines and derivatives	Pyrrolidinylpyridines	0	31.4	-	-	1.3893	1.3695	0.03337	0.1087	5.9943	5.7719	5.5095	5.5052	5.9396	5.5105	5.2925	5.6738	5.3169	5.2538
pos_6089	(2,5-Dihydroxypyrrol-1-yl) 4-[(2,5-dioxopyrrol-1-yl)methyl]cyclohexane-1-carboxylate	metab_5457	yes	-	pos	-	352.15	2.63835	M+NH4	C16H18N2O6	0	57.7	HMDB0242490	-	-	-	-	-	Organoheterocyclic compounds	Pyrrolidines	Pyrrolidones	0	57.7	-	-	2.3078	2.3411	0.02329	0.08251	5.2003	3.8157	5.344	5.1671	5.3398	3.9067	4.3995	3.8583	3.9966	4.3357
pos_1761	7-Aminomethyl-7-carbaguanine	metab_820	yes	C16675	pos	-	180.088	1.7661	M+H	C7H9N5O	0	60.8	HMDB0011690	-	-	map01100;map00790	Metabolism;Metabolism	Global and overview maps;Metabolism of cofactors and vitamins	Organoheterocyclic compounds	Pyrrolopyrimidines	Pyrrolo[2,3-d]pyrimidines	0	60.8	Metabolic pathways;Folate biosynthesis	Metabolic pathways;Folate biosynthesis	1.4253	1.4067	4.169e-06	0.0001749	6.2598	6.2653	6.2446	6.2684	6.2513	5.9992	6.0356	6.0418	5.9333	6.054
neg_7201	Cyclic 3-Hydroxymelatonin	metab_14598	yes	-	neg	-	293.114	4.05303	M+FA-H	C13H16N2O3	0	44.9	HMDB0060069	-	-	-	-	-	Organoheterocyclic compounds	Indoles and derivatives	Pyrroloindoles	0	44.9	-	-	1.4467	1.5284	0.02362	0.04973	3.9174	3.2498	4.3531	3.8975	4.5001	3.2758	3.4315	3.6476	3.1444	2.9269
pos_1836	Blebbistatin	metab_903	yes	-	pos	-	585.25	1.89077	2M+H	C18H16N2O2	0	31.3	HMDB0243556	-	-	-	-	-	Organoheterocyclic compounds	Quinolines and derivatives	Pyrroloquinolines	0	31.3	-	-	1.2761	1.2559	0.01883	0.07079	5.6811	5.5416	5.6286	5.7139	5.6198	5.6102	5.2425	5.2686	5.5502	5.2339
pos_265	L-Carnitine	metab_1775	yes	C00318	pos	541-15-1	162.112	0.5766	M+H, M+K, M+Na	C7H15NO3	94.7	0	PW_C000044;HMDB0000062;MJDBOTE0000806	-	-	map05415;map04976;map04714	Human Diseases;Organismal Systems;Organismal Systems	Cardiovascular disease;Digestive system;Environmental adaptation	Organic nitrogen compounds	Organonitrogen compounds	Quaternary ammonium salts	94.7	0	Diabetic cardiomyopathy;Bile secretion;Thermogenesis	Diabetic cardiomyopathy;Bile secretion;Thermogenesis	1.045	1.032	0.0004284	0.004298	5.9704	5.948	5.9593	5.9471	5.953	5.7938	5.8945	5.7806	5.7566	5.8393
neg_7834	Kynurenic Acid	metab_15289	yes	C01717	neg	492-27-3	188.035	3.38515	M-H	C10H7NO3	90.8	0	HMDB0000715;PW_C000566;MJDBOTE0000367	-	-	map01100;map00380	Metabolism;Metabolism	Global and overview maps;Amino acid metabolism	Organoheterocyclic compounds	Quinolines and derivatives	Quinoline carboxylic acids	90.8	0	Metabolic pathways;Tryptophan metabolism	Metabolic pathways;Tryptophan metabolism	1.1546	1.1235	0.0001926	0.001298	4.5732	4.6507	4.542	4.6472	4.5208	5.0385	4.8292	4.8841	5.0371	4.8535
neg_6609	Di-deacetyl adrogolide	metab_13956	yes	-	neg	-	336.102	4.86122	M+Na-2H	C18H21NO2S	0	47.8	HMDB0247722	-	-	-	-	-	Organoheterocyclic compounds	Quinolines and derivatives	Quinolones and derivatives	0	47.8	-	-	1.6094	1.579	0.006994	0.01914	3.7121	2.7216	3.5554	3.9671	3.6361	2.7305	2.7398	2.7316	2.7159	2.854
neg_2342	Dihydrophaseic acid	metab_9328	yes	C15971	neg	41756-77-8	563.283	2.46853	2M-H	C15H22O5	0	54.6	HMDB0038660;LMPR0103050005	-	-	map00906	Metabolism	Metabolism of terpenoids and polyketides	Lipids and lipid-like molecules	Prenol lipids	Sesquiterpenoids	0	54.6	Carotenoid biosynthesis	Carotenoid biosynthesis	1.99	1.9708	2.832e-08	1.906e-06	5.2997	5.2906	5.2501	5.3043	5.2649	4.3901	4.2504	4.2286	4.411	4.44
neg_3955	Tanacetol A	metab_11088	yes	-	neg	86778-06-5	315.156	4.63793	M+Na-2H	C17H26O4	0	35.2	HMDB0035722	-	-	-	-	-	Lipids and lipid-like molecules	Prenol lipids	Sesquiterpenoids	0	35.2	-	-	1.7108	1.6566	0.003249	0.01083	4.4209	4.3501	4.4828	4.6167	4.5667	2.9439	3.864	3.9839	3.5801	3.9438
neg_8045	Farnesylcysteine	metab_15520	yes	C19691	neg	68000-92-0	360.178	3.1761	M+Cl	C18H31NO2S	0	57.1	HMDB0011627	-	-	map01110;map00900	Metabolism;Metabolism	Global and overview maps;Metabolism of terpenoids and polyketides	Lipids and lipid-like molecules	Prenol lipids	Sesquiterpenoids	0	57.1	Biosynthesis of secondary metabolites;Terpenoid backbone biosynthesis	Biosynthesis of secondary metabolites;Terpenoid backbone biosynthesis	1.1705	1.2167	0.01892	0.04178	4.1354	4.0463	4.734	4.1902	4.7262	3.8216	4.0227	3.9396	3.8476	3.9354
neg_943	24-Acetyl-25-cinnamoylvulgaroside	metab_17015	yes	-	neg	172616-89-6	589.32	4.50108	M-H2O-H, M+Na-2H	C36H48O8	0	72.6	HMDB0041368	-	-	-	-	-	Lipids and lipid-like molecules	Prenol lipids	Sesterterpenoids	0	72.6	-	-	1.5115	1.4767	0.000574	0.002912	5.9081	5.4143	5.9704	5.8786	5.9924	5.2184	5.202	5.2798	5.2926	5.171
neg_1821	L-2-Hydroxyglutaric acid	metab_8774	yes	C03196	neg	13095-48-2	147.029	1.08007	M-H	C5H8O5	0	44.4	PW_C000546;HMDB0000694	-	-	map01100;map00310;map01120	Metabolism;Metabolism;Metabolism	Global and overview maps;Amino acid metabolism;Global and overview maps	Organic acids and derivatives	Hydroxy acids and derivatives	Short-chain hydroxy acids and derivatives	0	44.4	Metabolic pathways;Lysine degradation;Microbial metabolism in diverse environments	Metabolic pathways;Lysine degradation;Microbial metabolism in diverse environments	1.6935	1.649	1.713e-05	0.0002345	5.2829	5.2965	5.6222	5.3345	5.5968	4.709	4.7582	4.7707	4.6888	4.6704
pos_5826	Fusidic Acid	metab_7498	yes	C06694	pos	6990-06-3;54-31-9	555.312	3.052	M+K	C31H48O6	0	34.3	HMDB0015570;HMDB0001933;MJDBOTE0000983	Antibiotics	Others	-	-	-	Lipids and lipid-like molecules	Steroids and steroid derivatives	Steroid esters	0	34.3	-	-	1.3491	1.3316	0.001568	0.01025	4.8816	4.9405	4.8993	5.0996	5.0599	5.1653	5.2715	5.2924	5.1518	5.2165
neg_5078	Physangulide	metab_12297	yes	-	neg	131749-58-1	543.255	7.1103	M+Na-2H	C28H42O9	0	53.9	HMDB0037381	-	-	-	-	-	Lipids and lipid-like molecules	Steroids and steroid derivatives	Steroid lactones	0	53.9	-	-	1.1425	1.107	0.01251	0.02995	4.5271	4.4865	4.6076	4.5601	4.6324	4.2468	3.777	4.3411	3.9704	4.4493
neg_704	Glycosides	metab_14424	yes	C01443	neg	-	583.273	3.4738	M-H, M+Na-2H	C29H44O12	0	43.7	HMDB0031448	Steroids	23-Carbon atoms	map04976	Organismal Systems	Digestive system	Lipids and lipid-like molecules	Steroids and steroid derivatives	Steroid lactones	0	43.7	Bile secretion	Bile secretion	1.5953	1.564	1.817e-09	2.064e-07	5.7783	5.7389	5.8052	5.7701	5.7882	5.1794	5.1845	5.1779	5.2247	5.1186
pos_1056	Bufalin	metab_64	yes	C16922	pos	465-21-4	369.242	5.67623	M+H-H2O, M+H	C24H34O4	67.1	0	LMST01130001;HMDB0249428	Steroids	24-Carbon atoms	-	-	-	Lipids and lipid-like molecules	Steroids and steroid derivatives	Steroid lactones	67.1	0	-	-	1.33	1.3404	0.0122	0.05083	6.3903	6.513	6.2542	6.3859	6.3266	6.9028	6.6142	6.5232	6.7141	6.4933
pos_5911	Physagulin G	metab_5266	yes	-	pos	148076-22-6	705.319	2.91938	M+H-H2O	C36H50O15	0	78	HMDB0039694	-	-	-	-	-	Lipids and lipid-like molecules	Steroids and steroid derivatives	Steroid lactones	0	78	-	-	1.9693	1.9332	0.001417	0.009616	4.4963	4.8944	5.1737	4.9606	4.8815	4.3483	4.3556	4.3598	4.3643	4.366
pos_6042	Corchorosol A	metab_5406	yes	-	pos	23838-13-3	269.155	2.70878	M+2H	C29H44O9	0	34	HMDB0041137	-	-	-	-	-	Lipids and lipid-like molecules	Steroids and steroid derivatives	Steroid lactones	0	34	-	-	2.864	2.8109	8.883e-06	0.0003186	4.8605	4.6118	4.8336	4.4491	4.8432	3.6306	3.6378	3.8971	3.6466	3.8393
neg_2753	Veratrine	metab_9778	yes	-	neg	-	628.295	3.04768	M+K-2H	C32H49NO9	0	64.8	HMDB0259783	-	-	-	-	-	Lipids and lipid-like molecules	Steroids and steroid derivatives	Steroidal alkaloids	0	64.8	-	-	1.5094	1.5083	0.0004501	0.00244	4.7093	4.66	4.4643	4.7498	4.5891	4.1897	3.8793	4.201	4.1757	3.7734
pos_2177	Ginsenoside I	metab_1266	yes	C10822	pos	227758-58-9	501.266	2.39672	M+H+Na	C48H82O20	0	33.8	HMDB0035285	-	-	map01066	Metabolism	Chemical structure transformation maps	Lipids and lipid-like molecules	Steroids and steroid derivatives	Steroidal alkaloids	0	33.8	Biosynthesis of alkaloids derived from terpenoid and polyketide	Biosynthesis of alkaloids derived from terpenoid and polyketide	1.0595	1.0353	0.004904	0.02529	5.4513	5.352	5.5506	5.4791	5.5017	5.3214	5.2747	5.3273	5.3816	5.2356
pos_4772	Jervine	metab_4076	yes	C10811	pos	469-59-0	426.3	5.63707	M+H	C27H39NO3	0	62.1	HMDB0253731;MJDBOTE0000999	-	-	map01066	Metabolism	Chemical structure transformation maps	Lipids and lipid-like molecules	Steroids and steroid derivatives	Steroidal alkaloids	0	62.1	Biosynthesis of alkaloids derived from terpenoid and polyketide	Biosynthesis of alkaloids derived from terpenoid and polyketide	2.8071	2.7626	8.124e-06	0.0003004	4.5043	4.6743	4.4596	4.5832	4.4917	5.7587	5.3184	5.396	5.6479	5.3668
neg_6762	Deoxycholic acid 3-glucuronide	metab_14124	yes	C03033	neg	72504-58-6	589.301	4.5894	M+Na-2H	C30H48O10	0	75.8	LMST05010046;HMDB0002596	-	-	map01100;map00040;map04976;map00053;map01240	Metabolism;Metabolism;Organismal Systems;Metabolism;Metabolism	Global and overview maps;Carbohydrate metabolism;Digestive system;Carbohydrate metabolism;Global and overview maps	Lipids and lipid-like molecules	Steroids and steroid derivatives	Steroidal glycosides	0	75.8	Metabolic pathways;Pentose and glucuronate interconversions;Bile secretion;Ascorbate and aldarate metabolism;Biosynthesis of cofactors	Metabolic pathways;Pentose and glucuronate interconversions;Bile secretion;Ascorbate and aldarate metabolism;Biosynthesis of cofactors	2.1611	2.1135	1.644e-09	1.959e-07	5.2276	5.1256	5.2341	5.2798	5.2437	4.0876	4.1094	4.1952	4.1737	4.0578
neg_7215	Notoginsenoside R10	metab_14613	yes	-	neg	335157-20-5	589.32	4.03702	M+Cl	C30H50O9	0	72.1	HMDB0039051	-	-	-	-	-	Lipids and lipid-like molecules	Steroids and steroid derivatives	Steroidal glycosides	0	72.1	-	-	1.3577	1.3272	2.594e-08	1.76e-06	5.8521	5.821	5.8474	5.8341	5.8469	5.3379	5.389	5.4518	5.4311	5.4176
neg_8276	Cortolone-3-glucuronide	metab_15771	yes	-	neg	56162-46-0	541.263	2.95932	M-H	C27H42O11	0	70.8	HMDB0010320	-	-	-	-	-	Lipids and lipid-like molecules	Steroids and steroid derivatives	Steroidal glycosides	0	70.8	-	-	1.2072	1.1913	6.022e-05	0.0005718	4.8095	4.8212	4.7336	4.9857	4.8142	4.4793	4.3925	4.5354	4.4761	4.4739
pos_1790	Capsicoside A1	metab_852	yes	-	pos	-	320.176	1.82057	M+2Na	C33H54O9	0	35.9	HMDB0303762	-	-	-	-	-	Lipids and lipid-like molecules	Steroids and steroid derivatives	Steroidal glycosides	0	35.9	-	-	1.9306	1.8992	0.0002815	0.004298	5.0756	5.0448	5.0906	4.9769	5.0832	4.7768	4.4491	4.5732	4.7211	4.3963
pos_2525	Trigofoenoside E1	metab_1642	yes	-	pos	101910-70-7	547.261	3.09097	M+2Na	C51H84O22	0	35.4	HMDB0038617	-	-	-	-	-	Lipids and lipid-like molecules	Steroids and steroid derivatives	Steroidal glycosides	0	35.4	-	-	1.5359	1.5217	2.333e-05	0.0006688	6.3223	6.3011	6.2347	6.2637	6.2063	5.9071	6.0662	5.9634	5.9701	5.9738
pos_6233	Esculeoside A	metab_5615	yes	-	pos	-	635.803	2.4358	M+2H	C58H95NO29	0	90.5	HMDB0251947	-	-	-	-	-	Lipids and lipid-like molecules	Steroids and steroid derivatives	Steroidal glycosides	0	90.5	-	-	1.6375	1.5969	0.04807	0.1423	4.1841	3.2525	3.7121	4.1865	3.267	3.2274	3.2346	3.2389	3.2434	3.245
pos_6448	(3a,5b,7a)-23-Carboxy-7-hydroxy-24-norcholan-3-yl-b-D-Glucopyranosiduronic acid	metab_5849	yes	-	pos	58814-71-4	285.168	2.17822	M+2H	C30H48O10	0	52.2	HMDB0002430;HMDB0243600	-	-	-	-	-	Lipids and lipid-like molecules	Steroids and steroid derivatives	Steroidal glycosides	0	52.2	-	-	2.4286	2.3883	0.00123	0.008675	4.6659	4.7027	5.1238	4.9613	4.9555	4.2787	4.1454	4.3325	3.5589	4.1253
pos_6737	Cholestane-3,7,12,25-tetrol-3-glucuronide	metab_6145	yes	C03033	pos	77172-80-6	329.182	1.90642	M+2Na	C33H56O10	0	36.5	LMST05010042;HMDB0010355	-	-	map01100;map00040;map04976;map00053;map01240	Metabolism;Metabolism;Organismal Systems;Metabolism;Metabolism	Global and overview maps;Carbohydrate metabolism;Digestive system;Carbohydrate metabolism;Global and overview maps	Lipids and lipid-like molecules	Steroids and steroid derivatives	Steroidal glycosides	0	36.5	Metabolic pathways;Pentose and glucuronate interconversions;Bile secretion;Ascorbate and aldarate metabolism;Biosynthesis of cofactors	Metabolic pathways;Pentose and glucuronate interconversions;Bile secretion;Ascorbate and aldarate metabolism;Biosynthesis of cofactors	1.5415	1.5083	7.105e-05	0.001613	5.8531	5.7334	5.9243	5.8985	5.8282	5.5694	5.5496	5.6164	5.5519	5.4857
pos_5860	4-Hydroxystyrene	metab_5210	yes	C05627	pos	2628-17-3	263.102	2.98183	2M+Na	C8H8O	0	34.7	HMDB0004072	-	-	map01110;map00940	Metabolism;Metabolism	Global and overview maps;Biosynthesis of other secondary metabolites	Benzenoids	Benzene and substituted derivatives	Styrenes	0	34.7	Biosynthesis of secondary metabolites;Phenylpropanoid biosynthesis	Biosynthesis of secondary metabolites;Phenylpropanoid biosynthesis	1.4336	1.4417	0.01588	0.06202	4.7313	5.1184	4.4898	4.8095	4.6493	5.1022	5.0699	5.0446	5.0626	5.12
pos_481	Styrene	metab_7516	yes	C07083	pos	100-42-5	105.07	2.1004	M+H, M+NH4	C8H8	72.1	0	HMDB0034240	-	-	map01100;map01220;map01120;map00642;map00643	Metabolism;Metabolism;Metabolism;Metabolism;Metabolism	Global and overview maps;Global and overview maps;Global and overview maps;Xenobiotics biodegradation and metabolism;Xenobiotics biodegradation and metabolism	Benzenoids	Benzene and substituted derivatives	Styrenes	72.1	0	Metabolic pathways;Degradation of aromatic compounds;Microbial metabolism in diverse environments;Ethylbenzene degradation;Styrene degradation	Metabolic pathways;Degradation of aromatic compounds;Microbial metabolism in diverse environments;Ethylbenzene degradation;Styrene degradation	1.7901	1.7673	6.282e-06	0.000246	6.3598	6.4439	6.4393	6.4976	6.3258	5.9601	6.0191	6.035	6.0331	6.0875
neg_3949	Estrone	metab_17608	yes	C02538	neg	53-16-7;481-97-0	585.325	4.62198	2M+FA-H	C18H22O2	0	33.7	HMDB0001425;LMST02010004;HMDB0000145;PW_C000094;MJDBOTE0000769	Hormones and transmitters	Steroid hormones	map01100;map00140;map04976	Metabolism;Metabolism;Organismal Systems	Global and overview maps;Lipid metabolism;Digestive system	Lipids and lipid-like molecules	Steroids and steroid derivatives	Sulfated steroids	0	33.7	Metabolic pathways;Steroid hormone biosynthesis;Bile secretion	Metabolic pathways;Steroid hormone biosynthesis;Bile secretion	1.3803	1.3737	2.109e-05	0.0002683	4.9948	5.07	4.9758	5.0416	4.9469	4.6655	4.6125	4.5306	4.3911	4.483
neg_3482	Sertraline	metab_10579	yes	C07246	neg	79617-96-2	326.048	3.92518	M+Na-2H	C17H17Cl2N	0	33.2	HMDB0258197;HMDB0005010	-	-	-	-	-	Benzenoids	Tetralins	Tametralines	0	33.2	-	-	1.1458	1.1211	0.003835	0.01235	4.5842	4.5432	4.5061	4.6846	4.5945	4.4634	4.0432	4.336	3.9927	4.2071
neg_3256	Pisumionoside	metab_10330	yes	-	neg	371113-06-3	449.207	3.61837	M+FA-H	C19H32O9	0	68.8	HMDB0039947	-	-	-	-	-	Lipids and lipid-like molecules	Prenol lipids	Terpene glycosides	0	68.8	-	-	1.5967	1.5629	0.0007005	0.003385	4.5396	5.1738	4.4989	4.6804	4.5325	5.332	5.3823	5.3647	5.3836	5.3369
neg_4550	(3b,20R,22R)-3,20,27-Trihydroxy-1-oxowitha-5,24-dienolide 3-glucoside	metab_11743	yes	-	neg	227179-09-1	615.318	5.62038	M-H2O-H	C34H50O11	0	51.7	HMDB0033573	-	-	-	-	-	Lipids and lipid-like molecules	Prenol lipids	Terpene glycosides	0	51.7	-	-	1.8825	1.8704	1.714e-06	4.527e-05	4.3142	4.2958	4.1067	4.3316	4.3404	3.638	3.382	3.3738	3.3581	3.3657
neg_529	Cinncassiol D2 glucoside	metab_12530	yes	-	neg	-	529.262	2.7419	M-H2O-H, M-H	C26H42O11	0	39.3	HMDB0034679	-	-	-	-	-	Lipids and lipid-like molecules	Prenol lipids	Terpene glycosides	0	39.3	-	-	1.4959	1.543	0.01773	0.03964	4.9375	4.4886	5.6716	4.7081	5.662	4.3672	4.4011	4.3705	4.4186	4.2439
neg_7847	Shanzhiside methyl ester	metab_15303	yes	-	neg	-	451.147	3.3692	M+FA-H	C17H26O11	0	49.3	HMDB0258271	-	-	-	-	-	Lipids and lipid-like molecules	Prenol lipids	Terpene glycosides	0	49.3	-	-	1.9567	1.9759	0.008326	0.02185	4.8746	3.5869	4.9996	4.7525	4.9838	3.6024	3.7126	3.7737	2.7147	3.6375
pos_1579	(1R,4Ar,5S,7R)-7-methyl-1-[(2R,3S,4R,5R,6S)-3,4,5-trihydroxy-6-(hydroxymethyl)oxan-2-yl]oxy-1,5,6,7a-tetrahydrocyclopenta[c]pyran-4a,5,7-triol	metab_629	yes	-	pos	-	403.098	1.16162	M+K	C15H24O10	0	30.3	HMDB0242331	-	-	-	-	-	Lipids and lipid-like molecules	Prenol lipids	Terpene glycosides	0	30.3	-	-	2.8334	2.7921	5.419e-05	0.0013	5.5937	5.4908	5.6058	5.6001	5.507	4.7684	4.5795	4.3787	4.9171	4.2347
pos_2082	Lablaboside C	metab_1163	yes	-	pos	209802-42-6	633.314	2.24058	M+2H	C60H96O28	0	80.7	HMDB0032893	-	-	-	-	-	Lipids and lipid-like molecules	Prenol lipids	Terpene glycosides	0	80.7	-	-	2.5609	2.5125	6.256e-07	4.233e-05	5.2003	5.1313	5.3505	5.3457	5.1754	4.4919	4.3634	4.4557	4.5548	4.4736
pos_6913	Lyciumoside VIII	metab_6338	yes	-	pos	212773-47-2	335.179	1.75842	M+H+Na	C32H54O13	0	48.6	HMDB0033210	-	-	-	-	-	Lipids and lipid-like molecules	Prenol lipids	Terpene glycosides	0	48.6	-	-	1.0329	1.0174	0.01804	0.06856	5.4827	5.3455	5.5231	5.5941	5.4831	5.3708	5.3069	5.439	5.2423	5.2198
pos_5992	3-Dehydronobilin	metab_5350	yes	-	pos	63529-14-6	408.176	2.78683	M+ACN+Na	C20H24O5	0	36	HMDB0036691	-	-	-	-	-	Lipids and lipid-like molecules	Prenol lipids	Terpene lactones	0	36	-	-	3.9393	3.8625	0.001512	0.01005	5.4243	4.0965	5.795	5.2382	5.764	3.8277	2.665	4.0652	2.6737	2.6754
neg_6893	Fluvoxamine	metab_14268	yes	C07571	neg	54739-18-3	635.308	4.40507	2M-H	C15H21F3N2O2	0	34.2	HMDB0014322	-	-	-	-	-	Benzenoids	Benzene and substituted derivatives	Trifluoromethylbenzenes	0	34.2	-	-	2.2671	2.2241	1.849e-09	2.077e-07	4.758	4.7828	4.8542	4.7907	4.8634	3.5635	3.5728	3.5646	3.5489	3.7381
pos_6244	Lucidenic acid B	metab_5626	yes	-	pos	95311-95-8	488.27	2.42798	2M+3H2O+2H	C27H38O7	0	33.6	HMDB0037610	-	-	-	-	-	Lipids and lipid-like molecules	Prenol lipids	Triterpenoids	0	33.6	-	-	2.4428	2.3885	0.0001329	0.002469	4.9411	4.6727	4.9374	4.8363	5.072	4.3427	3.9313	4.3011	4.2097	3.9573
pos_6875	Triterpenoid	metab_6295	yes	C06085	pos	-	288.155	1.7661	M+H+Na	C30H48O7S	0	49.3	HMDB0004309	-	-	-	-	-	Lipids and lipid-like molecules	Prenol lipids	Triterpenoids	0	49.3	-	-	1.6657	1.633	3.655e-07	2.881e-05	5.6699	5.5969	5.7109	5.6915	5.6839	5.3231	5.3276	5.3538	5.3737	5.3416
pos_1946	5-Hydroxy-L-tryptophan	metab_1017	yes	C00643	pos	4350-09-08	221.092	2.0227	M+H	C11H12N2O3	0	70.9	HMDB0000472;PW_C000358	-	-	map01100;map04726;map01063;map00380;map04361	Metabolism;Organismal Systems;Metabolism;Metabolism;Organismal Systems	Global and overview maps;Nervous system;Chemical structure transformation maps;Amino acid metabolism;Development and regeneration	Organoheterocyclic compounds	Indoles and derivatives	Tryptamines and derivatives	0	70.9	Metabolic pathways;Serotonergic synapse;Biosynthesis of alkaloids derived from shikimate pathway;Tryptophan metabolism;Axon regeneration	Metabolic pathways;Serotonergic synapse;Biosynthesis of alkaloids derived from shikimate pathway;Tryptophan metabolism;Axon regeneration	1.3952	1.3735	0.000384	0.004298	5.6252	5.7931	5.5921	5.7065	5.5784	5.9117	5.8785	5.8743	5.9468	5.9348
neg_6672	Allyl-isopropyl-acetylharnstoff	metab_14026	yes	-	neg	-	427.256	4.74817	2M+Hac-H	C9H16N2O2	0	40.1	HMDB0258084	-	-	-	-	-	Organic acids and derivatives	Organic carbonic acids and derivatives	Ureas	0	40.1	-	-	1.1919	1.162	0.0001802	0.00125	4.8277	4.7057	4.977	4.8564	4.9401	4.4007	4.5502	4.5548	4.5173	4.4727
pos_256	3-ureido-isobutyrate	metab_1679	yes	C05100	pos	-	129.066	0.592	M+H-H2O, M+Na, M+H	C5H10N2O3	0	32.3	HMDB0304156	-	-	-	-	-	Organic acids and derivatives	Organic carbonic acids and derivatives	Ureas	0	32.3	-	-	2.3398	2.3013	2.266e-08	3.533e-06	5.6877	5.6184	5.6719	5.6657	5.6819	4.986	5.0173	4.9652	5.1218	5.0351
neg_4199	Chymostatin	metab_11356	yes	C11308	neg	9076-44-2	642.278	5.17465	M+Cl	C31H41N7O6	0	74.3	HMDB0242696	-	-	-	-	-	Lipids and lipid-like molecules	Steroids and steroid derivatives	Vitamin D and derivatives	0	74.3	-	-	1.8354	1.7818	4.684e-06	9.34e-05	5.4927	5.202	5.5959	5.599	5.5687	4.6535	4.6972	4.6744	4.6864	4.6737
neg_4567	Calcitroic acid	metab_11759	yes	C18230	neg	71204-89-2	419.244	5.63635	M+FA-H	C23H34O4	0	69.5	HMDB0006472	-	-	-	-	-	Lipids and lipid-like molecules	Steroids and steroid derivatives	Vitamin D and derivatives	0	69.5	-	-	1.406	1.37	0.0002169	0.001416	4.6554	4.9457	4.4702	4.6864	4.6577	5.2296	5.1775	5.1575	5.2497	5.1273
pos_2388	(S,E)-Zearalenone	metab_1494	yes	C09981	pos	17924-92-4	382.16	2.80235	M+ACN+Na	C18H22O5	0	52.1	HMDB0031752	-	-	-	-	-	Phenylpropanoids and polyketides	Macrolides and analogues	Zearalenones	0	52.1	-	-	1.8375	1.8015	0.003242	0.01847	5.2219	5.0412	5.1859	5.3304	5.2737	4.77	4.9003	4.8414	4.8436	4.3335
