# Supplementary material for: The microbiome- and metabolome-modulating activity of dietary cholesterol: insights from the small and large intestines
Source: Royal Society of Chemistry journal article supplement (doi:10.1039/d4fo03049d), 2025-01-01
Supplement: d4fo03049d3.xlsx [file d4fo03049d3.xlsx]

## Sheet: Sheet1
Table S3. Metabolites Significantly Altered in eSI_0 and eSI_05 Groups Based on Metabolomics
ID	Metabolite	Metab ID	Significant	KEGG Compound ID	Mode	CAS ID	M/Z	Retention time	Adducts	Formula	Fragmentation Score	Theoretical Fragmentation Score	Library ID	KEGG Compound First Category	KEGG Compound Second Category	KEGG Pathway ID	KEGG Pathway First Category	KEGG Pathway Second Category	HMDB Superclass	HMDB Class	HMDB Subclass	Fragmentation Score	Theoretical Fragmentation Score	KEGG Pathway Description	KEGG Pathway Description	VIP_pred_OPLS-DA	VIP_PLS-DA	P_value	FDR	eSI_0_1	eSI_0_2	eSI_0_3	eSI_0_4	eSI_0_5	eSI_05_1	eSI_05_2	eSI_05_3	eSI_05_4	eSI_05_5
neg_2583	Leu-Gly-Gly	metab_9590	yes	-	neg	-	244.13	2.83038	M-H	C10H19N3O4	53.9	0	-	-	-	-	-	-	-	-	-	53.9	0	-	-	1.6655	1.6541	5.186e-05	0.01087	5.6545	5.6812	5.6718	5.669	5.6728	5.5128	5.5368	5.5277	5.5416	5.6031
neg_3031	Glu Tyr Asp Lys	metab_10086	yes	-	neg	-	552.231	3.36123	M-H	C24H35N5O10	69.8	0	-	-	-	-	-	-	-	-	-	69.8	0	-	-	1.0846	1.0735	0.04271	0.2318	4.8569	4.9128	4.8958	5.0055	4.8752	4.8476	4.8455	4.7784	4.8086	4.8852
neg_3875	Ala Tyr Ile Asp	metab_11001	yes	-	neg	-	479.215	4.48513	M-H	C22H32N4O8	54.3	0	-	-	-	-	-	-	-	-	-	54.3	0	-	-	1.572	1.5619	0.0006257	0.02805	5.3557	5.3459	5.3372	5.3819	5.3593	5.2483	5.2109	5.2335	5.1865	5.308
neg_5028	Glycerophospho-N-Palmitoyl Ethanolamine	metab_12243	yes	-	neg	-	452.278	7.0783	M-H	C21H44NO7P	42.5	0	-	-	-	-	-	-	-	-	-	42.5	0	-	-	1.4621	1.4504	0.03241	0.2017	5.9811	6.0215	6.0354	6.0238	6.0469	6.1178	6.0867	6.1286	6.0879	6.3534
neg_5539	Dodecyl Hydrogen Sulfate	metab_12799	yes	-	neg	-	265.148	6.34922	M-H	C12H26O4S	59.8	0	-	-	-	-	-	-	-	-	-	59.8	0	-	-	2.1218	2.1107	0.0005261	0.02661	5.0652	4.9735	4.9851	5.0101	5.086	5.1823	5.268	5.1552	5.3313	5.2576
neg_5666	PE(18:1(9Z)/0:0)	metab_12939	yes	-	neg	-	478.294	6.01507	M-H	C23H46NO7P	85.7	0	LMGP02050004	-	-	-	-	-	-	-	-	85.7	0	-	-	1.5813	1.567	0.0451	0.2377	5.7323	6.06	6.0538	6.1148	6.0448	6.1614	6.1936	6.1599	6.1241	6.1904
neg_647	Tyr Ser Val Glu	metab_13802	yes	-	neg	-	495.209	3.24013	M-H, M+Na-2H	C22H32N4O9	33.5	0	-	-	-	-	-	-	-	-	-	33.5	0	-	-	1.8774	1.8659	0.004591	0.07694	4.8308	4.9979	4.9569	4.8266	4.8194	4.6459	4.6209	4.7289	4.7311	4.7769
neg_6783	N-Acetyl-D-phenylalanine	metab_14147	yes	C05620	neg	10172-89-1	206.082	4.56542	M-H	C11H13NO3	85.9	0	-	-	-	map01100;map00470	Metabolism;Metabolism	Global and overview maps;Metabolism of other amino acids	-	-	-	85.9	0	Metabolic pathways;D-Amino acid metabolism	Metabolic pathways;D-Amino acid metabolism	1.0396	1.0308	0.001486	0.04233	5.6763	5.6775	5.6553	5.6419	5.6554	5.6162	5.5837	5.6232	5.6273	5.5892
neg_7191	Glu-val-phe	metab_14586	yes	-	neg	-	392.182	4.06903	M-H	C19H27N3O6	70.1	0	-	-	-	-	-	-	-	-	-	70.1	0	-	-	1.176	1.1711	0.002933	0.06217	5.2843	5.267	5.2381	5.1995	5.2813	5.2013	5.168	5.1839	5.1863	5.1752
neg_7778	Ser Asp Arg Asp	metab_15226	yes	-	neg	-	490.195	3.44182	M-H	C17H29N7O10	62.3	0	-	-	-	-	-	-	-	-	-	62.3	0	-	-	1.2991	1.2916	0.00656	0.08915	4.7967	4.8261	4.7909	4.879	4.7962	4.6786	4.742	4.7901	4.7145	4.7084
neg_8715	8-hydroxy-2'-deoxy Guanosine	metab_16252	yes	-	neg	-	282.084	2.42802	M-H	C10H13N5O5	30.7	0	-	-	-	-	-	-	-	-	-	30.7	0	-	-	1.262	1.2608	0.003441	0.06639	5.1618	5.1507	5.1761	5.1258	5.1411	5.0273	5.0675	5.1055	5.0267	5.1126
neg_8930	8-hydroxy Guanosine	metab_16490	yes	-	neg	-	298.079	2.17167	M-H	C10H13N5O6	34.6	0	-	-	-	-	-	-	-	-	-	34.6	0	-	-	2.1253	2.1062	2.716e-05	0.006983	4.7523	4.7462	4.8082	4.7787	4.7795	5.0092	4.9411	4.9945	4.9103	5.0173
neg_9204	3-Deoxyguanosine	metab_16783	yes	-	neg	-	266.089	1.82747	M-H	C10H13N5O4	67	0	-	-	-	-	-	-	-	-	-	67	0	-	-	2.4306	2.4075	0.002445	0.0562	3.9041	3.8621	3.9988	3.9384	3.9824	3.4637	3.7449	3.6093	3.8185	3.563
pos_1118	Pro Thr	metab_130	yes	-	pos	-	217.118	1.26308	M+H, M+K	C9H16N2O4	72.1	0	-	-	-	-	-	-	-	-	-	72.1	0	-	-	1.5237	1.5189	3.11e-07	0.0004461	6.5512	6.5355	6.5366	6.534	6.5495	6.4627	6.4517	6.4592	6.4479	6.4699
pos_1165	Gly Leu Arg	metab_180	yes	-	pos	-	345.224	1.67255	M+2H, M+H	C14H28N6O4	70.7	0	-	-	-	-	-	-	-	-	-	70.7	0	-	-	1.1733	1.1725	0.0479	0.314	5.8202	5.9145	5.8459	5.7649	5.8479	5.9432	5.9314	5.9076	5.9605	5.8334
pos_125	N-[4-(4-methylphenyl)-1,3-thiazol-2-yl]heptanamide	metab_274	yes	-	pos	-	285.144	1.89077	M+H, 2M+K, M+H-H2O	C17H22N2OS	56.1	0	-	-	-	-	-	-	-	-	-	56.1	0	-	-	3.2744	3.2736	0.007833	0.1354	4.6009	4.7003	4.8191	4.888	4.8451	4.4306	4.3234	4.0082	3.9963	4.6636
pos_1321	Glu His Leu	metab_353	yes	-	pos	-	398.203	1.91418	M+H, M+CH3OH+H	C17H27N5O6	32	0	-	-	-	-	-	-	-	-	-	32	0	-	-	1.018	1.0159	0.02659	0.2569	6.2876	6.3124	6.3233	6.3112	6.3068	6.2351	6.2097	6.2361	6.312	6.2843
pos_1746	Arg Leu	metab_803	yes	-	pos	-	288.202	1.75842	M+H	C12H25N5O3	77.3	0	-	-	-	-	-	-	-	-	-	77.3	0	-	-	1.9284	1.9227	2.074e-05	0.00597	6.2219	6.2475	6.2016	6.2412	6.2237	6.3713	6.3509	6.4029	6.3233	6.3746
pos_2104	Gly Gly Ile	metab_1187	yes	-	pos	-	246.145	2.27958	M+H	C10H19N3O4	61.6	0	-	-	-	-	-	-	-	-	-	61.6	0	-	-	1.8364	1.8336	9.155e-06	0.003648	6.1108	6.1288	6.1169	6.1181	6.1354	5.9875	5.9971	5.9733	5.9904	6.0422
pos_2268	Val Ile	metab_1363	yes	-	pos	-	231.17	2.5603	M+H	C11H22N2O3	45.5	0	-	-	-	-	-	-	-	-	-	45.5	0	-	-	1.4521	1.4523	0.0144	0.1904	6.523	6.5741	6.5234	6.5082	6.5585	6.3987	6.3989	6.3862	6.451	6.5478
pos_2311	Gly Pro Ile	metab_1410	yes	-	pos	-	286.176	2.63835	M+H	C13H23N3O4	37.2	0	-	-	-	-	-	-	-	-	-	37.2	0	-	-	1.4793	1.4771	1.688e-05	0.005505	6.7279	6.7302	6.7248	6.7397	6.7576	6.6537	6.6479	6.6379	6.6582	6.6778
pos_2436	Val Asp Ile	metab_1548	yes	-	pos	-	346.197	2.9038	M+H	C15H27N3O6	66.1	0	-	-	-	-	-	-	-	-	-	66.1	0	-	-	1.1418	1.1385	0.02646	0.2567	5.438	5.4366	5.4512	5.4212	5.513	5.3862	5.3296	5.3787	5.4456	5.3888
pos_2485	Leu Leu	metab_1601	yes	-	pos	-	245.186	2.98183	M+H	C12H24N2O3	37.9	0	-	-	-	-	-	-	-	-	-	37.9	0	-	-	1.4795	1.4808	0.004452	0.1027	6.1184	6.1895	6.1001	6.1294	6.1376	6.0213	6.0258	6.0043	6.0307	6.1144
pos_2547	Tyr Asp Ile	metab_1665	yes	-	pos	-	410.191	3.12997	M+H	C19H27N3O7	68.8	0	-	-	-	-	-	-	-	-	-	68.8	0	-	-	1.4072	1.4067	0.01533	0.1978	4.8226	4.9264	4.8566	4.8145	4.8733	5.0059	4.9678	4.8997	4.8967	4.9974
pos_331	3-Methylpyridazine	metab_2472	yes	-	pos	-	112.087	0.459617	M+H, M+NH4	C5H6N2	40.1	0	-	-	-	-	-	-	-	-	-	40.1	0	-	-	1.6967	1.6893	0.0007629	0.04275	5.8794	5.862	5.8877	5.8387	5.8402	5.7769	5.8025	5.7252	5.7373	5.6922
pos_4335	(20R,22R)-20,22-dihydroxycholesterol	metab_3598	yes	C05501	pos	-	401.341	6.14908	M+H-H2O	C27H46O3	58.8	0	LMST01010200	-	-	map01100;map00140	Metabolism;Metabolism	Global and overview maps;Lipid metabolism	-	-	-	58.8	0	Metabolic pathways;Steroid hormone biosynthesis	Metabolic pathways;Steroid hormone biosynthesis	1.8064	1.8065	0.000104	0.01408	5.1335	5.079	5.0952	5.0697	5.1172	5.2612	5.2027	5.2127	5.2468	5.1938
pos_470	Gly Leu	metab_3996	yes	-	pos	-	189.123	2.04588	M+H, 2M+ACN+Na	C8H16N2O3	70.4	0	-	-	-	-	-	-	-	-	-	70.4	0	-	-	1.3064	1.3027	0.0004062	0.02702	6.8828	6.8939	6.8876	6.8675	6.8784	6.8207	6.8036	6.7962	6.801	6.8544
pos_4842	Cyclopenin	metab_4151	yes	-	pos	-	312.134	5.50358	M+NH4	C17H14N2O3	60.7	0	-	-	-	-	-	-	-	-	-	60.7	0	-	-	1.2243	1.2229	0.01379	0.1884	5.2719	5.3259	5.3169	5.3075	5.304	5.2172	5.2116	5.1918	5.3118	5.2373
pos_524	Ser Gly Ile	metab_4580	yes	-	pos	-	276.155	2.34205	M+H, M+ACN+Na	C11H21N3O5	40.5	0	-	-	-	-	-	-	-	-	-	40.5	0	-	-	1.3902	1.3875	0.0008702	0.0452	5.4888	5.5349	5.5411	5.5426	5.5231	5.4595	5.4277	5.4719	5.4149	5.4674
pos_530	Gly Pro Leu	metab_4645	yes	-	pos	-	286.176	2.38105	M+H, M+CH3OH+H	C13H23N3O4	57.3	0	-	-	-	-	-	-	-	-	-	57.3	0	-	-	1.3706	1.3697	5.397e-05	0.009677	6.6533	6.7049	6.6696	6.6744	6.6839	6.6042	6.6095	6.5984	6.603	6.6173
pos_5634	Propham	metab_4983	yes	C18887	pos	122-42-9	180.102	3.5967	M+H	C10H13NO2	59.8	0	-	-	-	-	-	-	-	-	-	59.8	0	-	-	1.6679	1.6661	0.01972	0.224	4.9051	4.9851	4.7757	4.8991	4.9381	4.7602	4.6752	4.7242	4.8647	4.7928
pos_5642	Flindersine	metab_4992	yes	C10679	pos	523-64-8	245.128	3.57328	M+NH4	C14H13NO2	56.2	0	-	-	-	-	-	-	-	-	-	56.2	0	-	-	1.1758	1.1744	0.04791	0.314	5.0587	5.1032	5.0629	5.0526	5.0568	4.9822	4.9922	5.0784	5.0153	4.884
pos_5723	NH-DVal(NMe)-Val-OMe	metab_5067	yes	-	pos	-	245.186	3.28585	M+H	C12H24N2O3	34.8	0	-	-	-	-	-	-	-	-	-	34.8	0	-	-	1.3174	1.315	0.01839	0.2163	6.2197	6.301	6.2479	6.1713	6.2381	6.1399	6.1269	6.1039	6.1649	6.2185
pos_5792	Ile Ser Leu	metab_5138	yes	-	pos	-	332.217	3.12213	M+H	C15H29N3O5	62.4	0	-	-	-	-	-	-	-	-	-	62.4	0	-	-	1.4364	1.4284	0.0074	0.1329	5.4376	5.358	5.3015	5.3657	5.353	5.3096	5.2278	5.2544	5.2746	5.2882
pos_5798	Gly Val Ile	metab_5143	yes	-	pos	-	288.191	3.1143	M+H	C13H25N3O4	42.3	0	-	-	-	-	-	-	-	-	-	42.3	0	-	-	1.2638	1.2593	0.004434	0.1027	5.87	5.9149	5.8614	5.8335	5.8406	5.8209	5.7818	5.7682	5.7867	5.8172
pos_5815	Leu Ile	metab_5162	yes	-	pos	-	245.186	3.09097	M+H	C12H24N2O3	38.2	0	-	-	-	-	-	-	-	-	-	38.2	0	-	-	1.4944	1.4922	0.008423	0.1405	6.6944	6.7607	6.7026	6.6612	6.7041	6.5871	6.5595	6.5723	6.5987	6.6973
pos_5828	Gly Pro Phe	metab_5175	yes	-	pos	-	320.16	3.04425	M+H	C16H21N3O4	59.3	0	-	-	-	-	-	-	-	-	-	59.3	0	-	-	1.2737	1.2733	0.001664	0.06186	5.8923	5.9041	5.8271	5.8828	5.9003	5.8081	5.8117	5.8118	5.8104	5.8283
pos_5836	Ile Pro Val	metab_5183	yes	-	pos	-	328.222	3.02877	M+H	C16H29N3O4	57	0	-	-	-	-	-	-	-	-	-	57	0	-	-	1.9254	1.9211	0.001849	0.06532	5.2397	5.23	5.2219	5.2557	5.2494	5.4359	5.4314	5.3315	5.2973	5.4681
pos_5837	Val Ala Val	metab_5184	yes	-	pos	-	288.191	3.02877	M+H	C13H25N3O4	55.9	0	-	-	-	-	-	-	-	-	-	55.9	0	-	-	1.2233	1.2197	0.02108	0.2301	5.7583	5.82	5.7074	5.6867	5.7643	5.6974	5.6533	5.6417	5.6905	5.6839
pos_5917	Val Phe	metab_5271	yes	-	pos	-	265.154	2.91938	M+H	C14H20N2O3	66.2	0	-	-	-	-	-	-	-	-	-	66.2	0	-	-	1.0667	1.067	0.04688	0.314	5.9451	6.041	5.9547	5.9104	5.9653	5.8712	5.8771	5.8841	5.9096	5.9592
pos_5989	Ile Leu	metab_5346	yes	-	pos	-	245.186	2.79463	M+H	C12H24N2O3	66.7	0	-	-	-	-	-	-	-	-	-	66.7	0	-	-	1.7674	1.7653	0.002022	0.06819	6.4198	6.4638	6.3918	6.396	6.4232	6.2626	6.2451	6.2642	6.2807	6.3902
pos_6058	Thr Leu	metab_5423	yes	-	pos	-	233.149	2.6853	M+H	C10H20N2O4	78.4	0	-	-	-	-	-	-	-	-	-	78.4	0	-	-	1.3528	1.3504	0.0003502	0.02644	5.7363	5.7525	5.7234	5.7287	5.7595	5.6711	5.6619	5.6342	5.6882	5.6872
pos_6230	Ala Gly Ile	metab_5612	yes	-	pos	-	260.16	2.44362	M+H	C11H21N3O4	42	0	-	-	-	-	-	-	-	-	-	42	0	-	-	1.5554	1.5517	0.005374	0.1156	5.2441	5.2964	5.3684	5.2764	5.3033	5.1993	5.1786	5.148	5.1688	5.2613
pos_6270	Ser Val Tyr	metab_5655	yes	-	pos	-	368.181	2.39672	M+H	C17H25N3O6	52.5	0	-	-	-	-	-	-	-	-	-	52.5	0	-	-	1.2479	1.2441	0.02321	0.2403	5.3478	5.4405	5.4273	5.3807	5.3946	5.3088	5.2377	5.3576	5.3537	5.3434
pos_6325	Leu Val	metab_5716	yes	-	pos	-	231.17	2.3264	M+H	C11H22N2O3	42.5	0	-	-	-	-	-	-	-	-	-	42.5	0	-	-	1.47	1.4711	0.01044	0.1608	6.616	6.6818	6.613	6.6249	6.6243	6.4911	6.5012	6.4954	6.5322	6.6374
pos_6331	Asn Glu Leu	metab_5723	yes	-	pos	-	375.187	2.31858	M+H	C15H26N4O7	44.9	0	-	-	-	-	-	-	-	-	-	44.9	0	-	-	1.0564	1.0588	0.004457	0.1027	6.1307	6.1381	6.136	6.1369	6.1595	6.0497	6.0866	6.0988	6.1164	6.1051
pos_6390	Gly Val Val	metab_5786	yes	-	pos	-	274.176	2.24833	M+H	C12H23N3O4	84.7	0	-	-	-	-	-	-	-	-	-	84.7	0	-	-	1.4827	1.476	0.0008284	0.0452	6.3881	6.4065	6.3791	6.3357	6.3466	6.2792	6.2729	6.2736	6.325	6.2658
pos_64	Gly Pro Gln	metab_5796	yes	-	pos	-	301.15	0.623083	M+H, M+K, M+CH3OH+H, M+Na	C12H20N4O5	58.1	0	-	-	-	-	-	-	-	-	-	58.1	0	-	-	1.0914	1.0914	0.007471	0.1333	6.0635	6.0624	6.0443	6.0942	6.0631	6.0192	6.0114	5.9639	6.0233	6.0404
pos_6466	Thr Ile	metab_5868	yes	-	pos	-	233.149	2.14708	M+H	C10H20N2O4	68.1	0	-	-	-	-	-	-	-	-	-	68.1	0	-	-	1.2225	1.2229	0.01402	0.1886	6.4519	6.4724	6.4128	6.4298	6.4609	6.3414	6.3462	6.3611	6.3706	6.4518
pos_6579	Gln Leu Val	metab_5983	yes	-	pos	-	359.228	2.0227	M+H	C16H30N4O5	36	0	-	-	-	-	-	-	-	-	-	36	0	-	-	4.6748	4.6642	5.325e-08	0.000191	6.2564	6.2546	6.1515	6.2261	6.2109	5.3906	5.5098	5.3882	5.5432	5.3729
pos_6585	Asp Ile Ser	metab_5990	yes	-	pos	-	334.16	2.01488	M+H	C13H23N3O7	71.9	0	-	-	-	-	-	-	-	-	-	71.9	0	-	-	1.4637	1.4646	0.006979	0.1305	5.7264	5.8113	5.7588	5.7136	5.7455	5.616	5.732	5.6512	5.6527	5.6205
pos_6828	Val Val	metab_6243	yes	-	pos	-	217.154	1.81288	M+H	C10H20N2O3	65.8	0	-	-	-	-	-	-	-	-	-	65.8	0	-	-	1.9197	1.9161	0.0002674	0.02256	6.2861	6.3283	6.286	6.2853	6.2864	6.1299	6.1119	6.1162	6.1726	6.2262
pos_7101	Lys Leu	metab_6538	yes	-	pos	-	260.196	1.43402	M+H	C12H25N3O3	83.2	0	-	-	-	-	-	-	-	-	-	83.2	0	-	-	1.09	1.0874	0.02909	0.2666	7.0044	7.0218	6.9731	6.9335	6.9603	6.9151	6.9129	6.9135	6.8705	6.9759
pos_7137	Tyr Lys	metab_6575	yes	-	pos	-	310.176	1.2709	M+H	C15H23N3O4	69.9	0	-	-	-	-	-	-	-	-	-	69.9	0	-	-	1.6785	1.6838	0.01069	0.1619	5.9907	6.0041	6.0199	5.9085	5.9016	6.2011	6.1152	6.1019	6.0284	6.0381
pos_7305	4-Methylpyrimidine	metab_6751	yes	-	pos	-	95.0607	0.903783	M+H	C5H6N2	74.3	0	-	-	-	-	-	-	-	-	-	74.3	0	-	-	1.0628	1.0543	0.03227	0.2782	5.066	4.965	5.0434	5.0018	5.0177	4.9845	4.9633	4.9763	4.9044	4.9736
neg_2408	Rhodamine B	metab_9401	yes	C19517	neg	81-88-9;64381-98-2	488.236	2.57288	M+FA-H	C28H31N2O3+	0	66.2	HMDB0031786	-	-	-	-	-	Organoheterocyclic compounds	Benzopyrans	1-benzopyrans	0	66.2	-	-	1.0724	1.0633	0.03095	0.1974	5.5081	5.5145	5.4904	5.5432	5.5527	5.4238	5.4494	5.3734	5.5023	5.504
pos_2522	Cromakalim	metab_1640	yes	C11819	pos	94470-67-4	304.165	3.08315	M+NH4	C16H18N2O3	0	54.2	HMDB0250542	-	-	-	-	-	Organoheterocyclic compounds	Benzopyrans	1-benzopyrans	0	54.2	-	-	1.5761	1.5709	0.006157	0.123	5.2408	5.2775	5.2777	5.2201	5.2753	5.1693	5.0922	5.0783	5.1769	5.2241
neg_2154	4-Hydroxyphenylacetic acid sulfate	metab_9122	yes	-	neg	-	266.975	2.16367	M+Cl	C8H8O6S	0	32.3	HMDB0304906	-	-	-	-	-	Benzenoids	Phenols	1-hydroxy-2-unsubstituted benzenoids	0	32.3	-	-	3.7418	3.706	8.477e-05	0.01255	3.0986	3.1215	3.2406	3.3864	3.4033	3.7471	3.8525	4.1052	3.8432	3.879
neg_2626	1H-Imidazole-4-carboxamide, 5-amino-1-(5-O-phosphono-beta-D-ribofuranosyl)-	metab_9637	yes	-	neg	-	383.059	2.8869	M+FA-H	C9H15N4O8P	0	38.2	HMDB0248071	-	-	-	-	-	Nucleosides, nucleotides, and analogues	Imidazole ribonucleosides and ribonucleotides	1-ribosyl-imidazolecarboxamides	0	38.2	-	-	1.4189	1.4064	0.002346	0.05445	4.8835	4.8708	4.9215	4.9452	4.9389	4.8425	4.752	4.8452	4.7897	4.8239
neg_9865	L-Histidinol	metab_17454	yes	C00860	neg	4836-52-6	327.178	0.616867	2M+FA-H	C6H11N3O	0	35.6	HMDB0003431	-	-	map01100;map00340;map01110;map01230	Metabolism;Metabolism;Metabolism;Metabolism	Global and overview maps;Amino acid metabolism;Global and overview maps;Global and overview maps	Organic nitrogen compounds	Organonitrogen compounds	Amines	0	35.6	Metabolic pathways;Histidine metabolism;Biosynthesis of secondary metabolites;Biosynthesis of amino acids	Metabolic pathways;Histidine metabolism;Biosynthesis of secondary metabolites;Biosynthesis of amino acids	1.2341	1.2204	0.00652	0.08886	4.7391	4.7916	4.7901	4.7047	4.8083	4.8443	4.8344	4.817	4.8657	4.8788
pos_3557	Dihomo-gamma-linolenoylethanolamide	metab_2743	yes	C13828	pos	150314-34-4	367.335	6.14908	M+NH4	C22H39NO2	0	32	HMDB0013625	-	-	-	-	-	Organic nitrogen compounds	Organonitrogen compounds	Amines	0	32	-	-	1.1033	1.1036	0.0291	0.2666	5.2112	5.1803	5.2471	5.1179	5.1897	5.212	5.2724	5.266	5.2514	5.2593
neg_10277	Lysyllysine	metab_7825	yes	-	neg	13184-13-9	273.193	0.448517	M-H	C12H26N4O3	0	41.3	HMDB0304785;HMDB0028956	-	-	-	-	-	Organic acids and derivatives	Carboxylic acids and derivatives	Amino acids, peptides, and analogues	0	41.3	-	-	1.891	1.8775	0.001496	0.04248	4.4719	4.4915	4.551	4.5034	4.5363	4.7788	4.6749	4.7545	4.6213	4.6076
neg_129	N-alpha-Acetyl-L-lysine	metab_8198	yes	C12989	neg	1946-82-3	187.108	2.66142	M-H, 2M-H, M+Cl	C8H16N2O3	0	49.9	HMDB0000446	-	-	-	-	-	Organic acids and derivatives	Carboxylic acids and derivatives	Amino acids, peptides, and analogues	0	49.9	-	-	1.2459	1.2396	0.001119	0.03744	6.509	6.5559	6.5396	6.5468	6.5467	6.4343	6.4735	6.4477	6.4515	6.5094
neg_1589	Ectoine	metab_8528	yes	C06231	neg	96702-03-3	187.072	0.59235	M+FA-H	C6H10N2O2	0	32	HMDB0240650;MJDBOTE0001351	-	-	map01100;map01120;map00260	Metabolism;Metabolism;Metabolism	Global and overview maps;Global and overview maps;Amino acid metabolism	Organic acids and derivatives	Carboxylic acids and derivatives	Amino acids, peptides, and analogues	0	32	Metabolic pathways;Microbial metabolism in diverse environments;Glycine, serine and threonine metabolism	Metabolic pathways;Microbial metabolism in diverse environments;Glycine, serine and threonine metabolism	1.1929	1.1783	0.002535	0.05724	5.1128	5.1057	5.1583	5.1774	5.1238	5.039	5.0818	5.0667	5.085	5.0485
neg_1672	N-acetylaspartate	metab_8619	yes	C01042	neg	997-55-7	174.04	0.6647	M-H	C6H9NO5	61.6	0	HMDB0000812	-	-	map01100;map00250	Metabolism;Metabolism	Global and overview maps;Amino acid metabolism	Organic acids and derivatives	Carboxylic acids and derivatives	Amino acids, peptides, and analogues	61.6	0	Metabolic pathways;Alanine, aspartate and glutamate metabolism	Metabolic pathways;Alanine, aspartate and glutamate metabolism	1.112	1.1081	0.00196	0.04937	5.4566	5.434	5.4222	5.4017	5.4096	5.4921	5.4701	5.4769	5.5234	5.473
neg_1828	Gamma-Glutamylarginine	metab_8780	yes	-	neg	31106-03-3	284.136	1.11225	M-H2O-H	C11H21N5O5	0	53.9	HMDB0029143	-	-	-	-	-	Organic acids and derivatives	Carboxylic acids and derivatives	Amino acids, peptides, and analogues	0	53.9	-	-	1.61	1.5971	0.0001338	0.01342	5.0458	5.0406	5.0434	5.0127	4.9926	5.1289	5.1541	5.1779	5.1683	5.1012
neg_1844	N5-Acetyl-N2-gamma-L-glutamyl-L-ornithine	metab_8797	yes	-	neg	102148-92-5	284.125	1.16807	M-H2O-H	C12H21N3O6	0	39.7	HMDB0039423	-	-	-	-	-	Organic acids and derivatives	Carboxylic acids and derivatives	Amino acids, peptides, and analogues	0	39.7	-	-	1.0834	1.073	0.00866	0.1024	6.0437	6.0474	6.0994	6.1264	6.0937	6.0309	6.0361	6.0015	5.9896	6.0327
neg_1914	Glycylvaline	metab_8867	yes	-	neg	1963-21-9	173.092	1.47718	M-H	C7H14N2O3	75.6	0	HMDB0028854;MJDBOTE0000605	-	-	-	-	-	Organic acids and derivatives	Carboxylic acids and derivatives	Amino acids, peptides, and analogues	75.6	0	-	-	2.0516	2.0257	0.001309	0.03947	4.866	4.8868	4.8614	4.9848	4.9201	4.7364	4.5814	4.6533	4.776	4.748
neg_1943	Isoleucyl-Threonine	metab_8895	yes	-	neg	-	231.135	1.6038	M-H	C10H20N2O4	0	32.4	HMDB0028917	-	-	-	-	-	Organic acids and derivatives	Carboxylic acids and derivatives	Amino acids, peptides, and analogues	0	32.4	-	-	1.4905	1.4909	0.02666	0.1825	4.9147	5.007	4.9237	4.8786	4.9129	4.7478	4.7274	4.7266	4.7779	4.9701
neg_2195	Leucylhydroxyproline	metab_9166	yes	-	neg	63912-01-6	243.135	2.26002	M-H	C11H20N2O4	0	59.1	HMDB0028930	-	-	-	-	-	Organic acids and derivatives	Carboxylic acids and derivatives	Amino acids, peptides, and analogues	0	59.1	-	-	1.4065	1.3956	0.000359	0.02278	6.4874	6.5065	6.5203	6.5432	6.5456	6.4317	6.4106	6.4202	6.4061	6.469
neg_2288	Neurotensin 11-13	metab_9268	yes	-	neg	-	428.215	2.38802	M+Na-2H	C21H33N3O5	0	51.1	HMDB0013024	-	-	-	-	-	Organic acids and derivatives	Carboxylic acids and derivatives	Amino acids, peptides, and analogues	0	51.1	-	-	1.0269	1.0198	0.02263	0.167	5.6073	5.6081	5.6425	5.676	5.7037	5.5847	5.5569	5.5882	5.5634	5.6267
neg_2294	2,4-Thiazolidinedicarboxylic acid, 2-methyl-	metab_9275	yes	-	neg	-	190.017	2.40402	M-H	C6H9NO4S	0	31.3	HMDB0244750	-	-	-	-	-	Organic acids and derivatives	Carboxylic acids and derivatives	Amino acids, peptides, and analogues	0	31.3	-	-	1.0605	1.0598	0.04915	0.2488	4.959	5.0248	4.896	4.9031	4.9633	4.8915	4.9085	4.8955	4.8882	4.7819
neg_2363	Threonylleucine	metab_9351	yes	-	neg	50299-12-2	231.135	2.50053	M-H	C10H20N2O4	0	30.4	HMDB0029065	-	-	-	-	-	Organic acids and derivatives	Carboxylic acids and derivatives	Amino acids, peptides, and analogues	0	30.4	-	-	1.2052	1.2036	0.02681	0.1825	5.3111	5.3714	5.339	5.3141	5.375	5.2131	5.2078	5.2222	5.2469	5.3706
neg_2526	Isoleucyl-Valine	metab_9528	yes	-	neg	-	229.155	2.7419	M-H	C11H22N2O3	0	43.7	HMDB0028920	-	-	-	-	-	Organic acids and derivatives	Carboxylic acids and derivatives	Amino acids, peptides, and analogues	0	43.7	-	-	1.4345	1.4325	0.005611	0.084	5.5329	5.5923	5.5234	5.5286	5.5601	5.3967	5.4095	5.4165	5.4207	5.5417
neg_2548	4-hydroxy-2-nonenal-[Cys-Gly] conjugate	metab_9552	yes	-	neg	-	667.305	2.77452	2M-H	C14H26N2O5S	0	78.5	HMDB0304175	-	-	-	-	-	Organic acids and derivatives	Carboxylic acids and derivatives	Amino acids, peptides, and analogues	0	78.5	-	-	1.1917	1.1825	0.0006056	0.02748	5.99	5.9884	5.984	5.9886	5.9829	5.8861	5.9505	5.8939	5.9281	5.9355
neg_2732	Gluten exorphin A5	metab_9755	yes	-	neg	-	598.248	3.01578	M-H	C29H37N5O9	0	73.9	HMDB0059793	-	-	-	-	-	Organic acids and derivatives	Carboxylic acids and derivatives	Amino acids, peptides, and analogues	0	73.9	-	-	2.9417	2.9305	0.01136	0.1178	4.2237	4.8598	4.5482	4.5543	4.681	4.1301	4.2075	4.1956	4.2348	3.6683
neg_2744	Asparaginyl-Phenylalanine	metab_9768	yes	-	neg	-	278.115	3.03972	M-H	C13H17N3O4	0	40.8	HMDB0028738	-	-	-	-	-	Organic acids and derivatives	Carboxylic acids and derivatives	Amino acids, peptides, and analogues	0	40.8	-	-	1.2993	1.2917	0.0006049	0.02748	5.1906	5.2247	5.2083	5.2177	5.2228	5.1008	5.1192	5.1245	5.1333	5.1814
neg_2799	Mucronine D	metab_9827	yes	C10009	neg	38496-00-3	682.353	3.0876	M+Na-2H	C37H51N5O6	0	30.5	HMDB0029335	-	-	-	-	-	Organic acids and derivatives	Carboxylic acids and derivatives	Amino acids, peptides, and analogues	0	30.5	-	-	1.0478	1.0413	0.0123	0.1203	5.6474	5.5914	5.5956	5.5524	5.5723	5.6691	5.6312	5.6363	5.6434	5.6886
neg_2824	N-Succinyl-L,L-2,6-diaminopimelate	metab_9856	yes	C04421	neg	26605-36-7	271.095	3.12012	M-H2O-H	C11H18N2O7	0	38.1	HMDB0012267	-	-	map01100;map01230;map00300;map01120	Metabolism;Metabolism;Metabolism;Metabolism	Global and overview maps;Global and overview maps;Amino acid metabolism;Global and overview maps	Organic acids and derivatives	Carboxylic acids and derivatives	Amino acids, peptides, and analogues	0	38.1	Metabolic pathways;Biosynthesis of amino acids;Lysine biosynthesis;Microbial metabolism in diverse environments	Metabolic pathways;Biosynthesis of amino acids;Lysine biosynthesis;Microbial metabolism in diverse environments	1.7798	1.7663	0.009096	0.1054	3.8251	3.8801	3.8593	3.9676	3.8394	3.6868	3.735	3.5795	3.655	3.8456
neg_2833	Valylleucine	metab_9866	yes	-	neg	3989-97-7	229.155	3.1361	M-H	C11H22N2O3	0	33.4	HMDB0029131	-	-	-	-	-	Organic acids and derivatives	Carboxylic acids and derivatives	Amino acids, peptides, and analogues	0	33.4	-	-	1.0933	1.098	0.04917	0.2488	5.5269	5.6229	5.5409	5.5621	5.5811	5.4358	5.4573	5.4447	5.4882	5.6031
neg_2996	Bremelanotide	metab_10045	yes	-	neg	-	1005.5	3.31262	M-H2O-H	C50H68N14O10	0	89.8	HMDB0249376	-	-	-	-	-	Organic acids and derivatives	Carboxylic acids and derivatives	Amino acids, peptides, and analogues	0	89.8	-	-	1.1778	1.173	0.0106	0.1138	5.8229	5.8222	5.7592	5.7753	5.7763	5.9229	5.8527	5.8616	5.898	5.8099
neg_2997	N-(2-Amino-2-oxoethyl)-2-methylprop-2-enamide	metab_10046	yes	-	neg	-	343.162	3.32062	2M+Hac-H	C6H10N2O2	0	40.9	HMDB0245677	-	-	-	-	-	Organic acids and derivatives	Carboxylic acids and derivatives	Amino acids, peptides, and analogues	0	40.9	-	-	1.0991	1.0941	0.00278	0.05996	4.8914	4.9362	4.9322	4.8916	4.9368	4.8655	4.8297	4.8514	4.8443	4.8878
neg_3035	Leucyl-leucine	metab_10090	yes	C11332	neg	3303-31-9;2883-36-5	243.171	3.3692	M-H	C12H24N2O3	0	35.3	HMDB0254039;HMDB0028933	-	-	-	-	-	Organic acids and derivatives	Carboxylic acids and derivatives	Amino acids, peptides, and analogues	0	35.3	-	-	1.5053	1.5029	0.005271	0.08183	5.4738	5.5166	5.4307	5.4517	5.4573	5.3017	5.3196	5.3037	5.3482	5.4538
neg_3094	Threonyltryptophan	metab_10154	yes	-	neg	186761-42-2	304.13	3.44182	M-H	C15H19N3O4	0	42.5	HMDB0029072	-	-	-	-	-	Organic acids and derivatives	Carboxylic acids and derivatives	Amino acids, peptides, and analogues	0	42.5	-	-	1.1048	1.0917	0.01562	0.1365	4.6	4.6821	4.5763	4.5722	4.6424	4.7065	4.6533	4.6801	4.6888	4.6924
neg_3154	L-Arginine, L-asparaginylglycyl-	metab_10220	yes	-	neg	-	380.146	3.5138	M+Cl	C12H23N7O5	0	39.1	HMDB0253872	-	-	-	-	-	Organic acids and derivatives	Carboxylic acids and derivatives	Amino acids, peptides, and analogues	0	39.1	-	-	1.0622	1.0628	0.02262	0.167	5.0295	4.9776	4.8973	4.9717	5.009	4.8828	4.8989	4.9264	4.9	4.9333
neg_3180	Histidylarginine	metab_10249	yes	-	neg	77369-21-2	681.358	3.54583	2M+Hac-H	C12H21N7O3	0	35.8	HMDB0028879	-	-	-	-	-	Organic acids and derivatives	Carboxylic acids and derivatives	Amino acids, peptides, and analogues	0	35.8	-	-	1.2709	1.2617	0.01176	0.1192	6.2555	6.2073	6.1622	6.1313	6.1365	6.2921	6.2772	6.2749	6.2932	6.2102
neg_3267	H-D-Tyr-val-gly-OH	metab_10342	yes	-	neg	-	318.146	3.63433	M-H2O-H	C16H23N3O5	0	33.2	HMDB0253011	-	-	-	-	-	Organic acids and derivatives	Carboxylic acids and derivatives	Amino acids, peptides, and analogues	0	33.2	-	-	1.1132	1.1013	0.001463	0.04193	5.3035	5.3251	5.3261	5.3206	5.2681	5.2596	5.2595	5.2269	5.2364	5.2563
neg_3288	Leucylleucine	metab_10364	yes	C11332	neg	3303-31-9	243.171	3.66633	M-H	C12H24N2O3	0	53.4	HMDB0254039;HMDB0028933	-	-	-	-	-	Organic acids and derivatives	Carboxylic acids and derivatives	Amino acids, peptides, and analogues	0	53.4	-	-	1.2205	1.2197	0.01779	0.147	5.9127	5.9891	5.9269	5.908	5.906	5.8158	5.8522	5.7885	5.8129	5.9327
neg_3326	Glutathione peroxide	metab_10406	yes	-	neg	-	372.025	3.713	M+Cl	C10H15N3O8S	0	39.5	HMDB0252820	-	-	-	-	-	Organic acids and derivatives	Carboxylic acids and derivatives	Amino acids, peptides, and analogues	0	39.5	-	-	2.6409	2.627	0.042	0.2293	3.4014	3.7916	4.1295	3.1693	4.05	4.1674	4.2058	4.1522	4.195	4.0769
neg_3358	Valyltryptophan	metab_10441	yes	-	neg	24587-37-9	302.151	3.76098	M-H	C16H21N3O3	0	34.6	HMDB0029138	-	-	-	-	-	Organic acids and derivatives	Carboxylic acids and derivatives	Amino acids, peptides, and analogues	0	34.6	-	-	1.595	1.5883	0.004546	0.07685	4.7371	4.8346	4.7602	4.7583	4.7503	4.5831	4.61	4.5833	4.6534	4.7416
neg_3376	Tyr-pro-leu-gly-NH2	metab_10461	yes	-	neg	-	492.246	3.77698	M+FA-H	C22H33N5O5	0	60.3	HMDB0259345	-	-	-	-	-	Organic acids and derivatives	Carboxylic acids and derivatives	Amino acids, peptides, and analogues	0	60.3	-	-	1.5203	1.5155	0.001085	0.0368	5.2965	5.3806	5.3037	5.3375	5.3905	5.1993	5.2233	5.228	5.2149	5.2735
neg_3810	Kinetensin 4-7	metab_10935	yes	-	neg	138482-56-1	592.262	4.37305	M+Na-2H	C26H37N9O6	0	47.4	HMDB0012986	-	-	-	-	-	Organic acids and derivatives	Carboxylic acids and derivatives	Amino acids, peptides, and analogues	0	47.4	-	-	1.6304	1.6231	0.0008075	0.03143	5.2548	5.1222	5.2337	5.2074	5.2215	5.3244	5.3503	5.3311	5.3675	5.3126
neg_3956	Gluten exorphin C	metab_11089	yes	-	neg	-	704.348	4.63793	M+K-2H	C29H57N5O12	0	76.8	HMDB0059796	-	-	-	-	-	Organic acids and derivatives	Carboxylic acids and derivatives	Amino acids, peptides, and analogues	0	76.8	-	-	1.1705	1.1668	0.0006581	0.02871	5.4693	5.4547	5.4801	5.4719	5.4893	5.5464	5.5148	5.5339	5.5775	5.5242
neg_4214	3-Hydroxymugineic acid	metab_11374	yes	-	neg	74235-23-7	335.107	5.20792	M-H	C12H20N2O9	0	31.1	HMDB0033927	-	-	-	-	-	Organic acids and derivatives	Carboxylic acids and derivatives	Amino acids, peptides, and analogues	0	31.1	-	-	1.4384	1.4247	0.00396	0.07061	4.7578	4.6384	4.7216	4.7273	4.7726	4.5867	4.5832	4.6393	4.6457	4.6277
neg_4322	N-Arachidonoyl Histidine	metab_11493	yes	-	neg	-	476.272	5.37918	M+Cl	C26H39N3O3	0	52.2	HMDB0241996;LMFA08020131	-	-	-	-	-	Organic acids and derivatives	Carboxylic acids and derivatives	Amino acids, peptides, and analogues	0	52.2	-	-	2.0432	2.0284	5.099e-05	0.01087	5.1345	5.1439	5.1335	5.0531	5.1023	5.3565	5.2913	5.2769	5.3259	5.2597
neg_601	Dslet	metab_13306	yes	C20165	neg	75644-90-5	685.316	3.05563	M-H, M+Na-2H	C33H46N6O10	0	88.2	HMDB0251628	-	-	-	-	-	Organic acids and derivatives	Carboxylic acids and derivatives	Amino acids, peptides, and analogues	0	88.2	-	-	1.1782	1.1663	0.002531	0.05724	5.6829	5.6941	5.6942	5.7268	5.7133	5.6026	5.5945	5.6446	5.6652	5.6541
neg_6476	Hydroxyprolyl-Valine	metab_13809	yes	-	neg	-	211.108	5.15115	M-H2O-H	C10H18N2O4	0	43.6	HMDB0028876	-	-	-	-	-	Organic acids and derivatives	Carboxylic acids and derivatives	Amino acids, peptides, and analogues	0	43.6	-	-	1.0728	1.0673	0.01168	0.1187	5.5626	5.4966	5.5224	5.5012	5.5588	5.447	5.4176	5.5003	5.4695	5.4821
neg_6478	Proline glutamate	metab_13811	yes	-	neg	-	281.073	5.1481	M+Na-2H	C10H16N2O6	0	30.7	HMDB0256798	-	-	-	-	-	Organic acids and derivatives	Carboxylic acids and derivatives	Amino acids, peptides, and analogues	0	30.7	-	-	1.3545	1.3502	0.01133	0.1177	5.1353	5.031	5.1372	5.0827	5.182	5.0096	4.9543	5.0569	4.9934	5.0385
neg_6992	N-({(1s,2r)-2-[(S)-[(1r)-1-{[(Benzyloxy)carbonyl]amino}-2-Phenylethyl](Hydroxy)phosphoryl]cyclopentyl}carbonyl)-L-Tryptophan	metab_14371	yes	-	neg	-	598.215	4.29305	M-H2O-H	C33H36N3O7P	0	76.7	HMDB0257370	-	-	-	-	-	Organic acids and derivatives	Carboxylic acids and derivatives	Amino acids, peptides, and analogues	0	76.7	-	-	1.2313	1.2211	0.004948	0.07925	5.564	5.5922	5.606	5.6093	5.6491	5.4813	5.5112	5.5087	5.5563	5.5638
neg_7092	(3S)-4-[[(1S)-1-Carboxy-2-phenylethyl]amino]-3-[8-(diaminomethylideneamino)octanoylamino]-4-oxobutanoic acid	metab_14480	yes	-	neg	-	444.225	4.16505	M-H2O-H	C22H33N5O6	0	32	HMDB0257534	-	-	-	-	-	Organic acids and derivatives	Carboxylic acids and derivatives	Amino acids, peptides, and analogues	0	32	-	-	1.1551	1.1396	0.03726	0.2165	4.7125	4.69	4.7331	4.7943	4.6853	4.6581	4.5743	4.5822	4.6622	4.7194
neg_7138	N-alpha-Acetyl-L-citrulline	metab_14530	yes	C15532	neg	33965-42-3	479.215	4.12503	2M+FA-H	C8H15N3O4	0	71.8	HMDB0000856	-	-	map01100;map00220;map01230	Metabolism;Metabolism;Metabolism	Global and overview maps;Amino acid metabolism;Global and overview maps	Organic acids and derivatives	Carboxylic acids and derivatives	Amino acids, peptides, and analogues	0	71.8	Metabolic pathways;Arginine biosynthesis;Biosynthesis of amino acids	Metabolic pathways;Arginine biosynthesis;Biosynthesis of amino acids	1.1885	1.1769	0.002301	0.05365	5.4009	5.4522	5.424	5.4237	5.4474	5.3699	5.3105	5.3641	5.3908	5.3576
neg_7251	Glucitol-lysine	metab_14653	yes	-	neg	-	331.151	3.99705	M+Na-2H	C12H26N2O7	0	32.1	HMDB0252764	-	-	-	-	-	Organic acids and derivatives	Carboxylic acids and derivatives	Amino acids, peptides, and analogues	0	32.1	-	-	1.019	1.0198	0.01348	0.1265	4.9104	4.9068	4.9131	4.8922	4.9151	4.8775	4.8619	4.8496	4.7758	4.8729
neg_7387	Dynorphin B (6-9)	metab_14802	yes	-	neg	-	626.315	3.85717	M+Na-2H	C26H43N11O6	0	78	HMDB0012937	-	-	-	-	-	Organic acids and derivatives	Carboxylic acids and derivatives	Amino acids, peptides, and analogues	0	78	-	-	1.3337	1.3262	0.003272	0.06511	5.4464	5.3687	5.4129	5.3768	5.3734	5.5065	5.4817	5.5252	5.4954	5.4282
neg_7463	Cyclo(aspartylleucylthreonylvalyltyrosylphenylalanylglycyl)	metab_14886	yes	-	neg	-	794.369	3.76098	M-H	C39H53N7O11	0	76	HMDB0303713	-	-	-	-	-	Organic acids and derivatives	Carboxylic acids and derivatives	Amino acids, peptides, and analogues	0	76	-	-	1.1248	1.1169	0.00201	0.05002	6.1258	6.0868	6.1043	6.0541	6.0656	6.1573	6.1284	6.1533	6.1582	6.1568
neg_7464	Mauritine A	metab_14887	yes	-	neg	38478-72-7	610.285	3.76098	M+Cl	C32H41N5O5	0	63.5	HMDB0029338	-	-	-	-	-	Organic acids and derivatives	Carboxylic acids and derivatives	Amino acids, peptides, and analogues	0	63.5	-	-	1.1951	1.1834	0.00209	0.05119	5.695	5.6204	5.6495	5.611	5.6486	5.6932	5.7229	5.7287	5.725	5.7121
neg_7509	Nummularine A	metab_14935	yes	C10011	neg	53947-95-8	682.341	3.713	M+Cl	C36H49N5O6	0	52.4	HMDB0029336	-	-	-	-	-	Organic acids and derivatives	Carboxylic acids and derivatives	Amino acids, peptides, and analogues	0	52.4	-	-	1.2324	1.23	0.012	0.1197	5.5799	5.4333	5.4911	5.4646	5.465	5.5815	5.572	5.54	5.5979	5.575
neg_7675	Deoxypyridinoline	metab_15116	yes	-	neg	83462-55-9	411.188	3.55382	M-H	C18H28N4O7	0	47.5	HMDB0000569	-	-	-	-	-	Organic acids and derivatives	Carboxylic acids and derivatives	Amino acids, peptides, and analogues	0	47.5	-	-	1.5109	1.4994	0.0003002	0.02095	5.4077	5.3775	5.4473	5.4418	5.396	5.5285	5.5103	5.5531	5.484	5.5292
neg_7715	Threonylphenylalanine	metab_15160	yes	-	neg	16875-27-7	265.119	3.5138	M-H	C13H18N2O4	0	47.4	HMDB0029068	-	-	-	-	-	Organic acids and derivatives	Carboxylic acids and derivatives	Amino acids, peptides, and analogues	0	47.4	-	-	1.0721	1.0592	0.002163	0.05245	4.883	4.8751	4.887	4.8642	4.8679	4.8019	4.8226	4.7812	4.8507	4.834
neg_7774	Acetyl-L-tyrosine	metab_15222	yes	C01657	neg	537-55-3	222.077	3.44982	M-H	C11H13NO4	68	0	HMDB0244966;HMDB0000866	-	-	-	-	-	Organic acids and derivatives	Carboxylic acids and derivatives	Amino acids, peptides, and analogues	68	0	-	-	1.1742	1.1696	0.0007776	0.03076	4.3914	4.3948	4.4268	4.4093	4.4447	4.3729	4.3486	4.3443	4.3242	4.3446
neg_80	Alanylhydroxyproline	metab_15470	yes	-	neg	76400-25-4	201.088	0.616867	M-H2O-H, M-H, M+Cl	C8H14N2O4	0	45.5	HMDB0028688	-	-	-	-	-	Organic acids and derivatives	Carboxylic acids and derivatives	Amino acids, peptides, and analogues	0	45.5	-	-	1.0121	1.0005	0.001918	0.04916	5.3959	5.3989	5.4137	5.3971	5.4302	5.3547	5.3423	5.3325	5.3833	5.3686
neg_8015	N-((Hexahydro-1-azepinyl)carbonyl)-leucyl(1-methyl)-tryptophyl-tryptophan	metab_15487	yes	-	neg	-	656.29	3.20812	M+K-2H	C34H45N5O6	0	57.5	HMDB0256177	-	-	-	-	-	Organic acids and derivatives	Carboxylic acids and derivatives	Amino acids, peptides, and analogues	0	57.5	-	-	1.9252	1.9071	0.0002737	0.01996	5.08	4.9663	5.0673	5.0108	5.004	4.8883	4.8339	4.8266	4.8114	4.9058
neg_8058	Val-Pro-Asp-Pro-Arg	metab_15534	yes	-	neg	-	627.311	3.1601	M+FA-H	C25H42N8O8	0	78.9	HMDB0244421	-	-	-	-	-	Organic acids and derivatives	Carboxylic acids and derivatives	Amino acids, peptides, and analogues	0	78.9	-	-	1.4266	1.4195	0.00171	0.04528	5.7109	5.6775	5.647	5.6406	5.6205	5.8043	5.7611	5.7495	5.7783	5.7121
neg_8141	Glycylserylprolylmethionylphenylalanylvalinamide	metab_15627	yes	-	neg	115525-98-9	656.29	3.07962	M+Na-2H	C29H45N7O7S	0	83.2	HMDB0033242	-	-	-	-	-	Organic acids and derivatives	Carboxylic acids and derivatives	Amino acids, peptides, and analogues	0	83.2	-	-	2.5879	2.5609	0.0005015	0.02629	5.0261	4.9653	4.8971	4.8682	4.9831	4.7438	4.5212	4.5098	4.7038	4.6782
neg_8373	Delta-Hydroxylysylnorleucine	metab_15878	yes	-	neg	-	272.162	2.86292	M-H2O-H	C12H25N3O5	0	46.2	HMDB0253190	-	-	-	-	-	Organic acids and derivatives	Carboxylic acids and derivatives	Amino acids, peptides, and analogues	0	46.2	-	-	1.1955	1.1862	0.002195	0.05275	5.8335	5.8586	5.8316	5.7822	5.7792	5.7422	5.7376	5.7359	5.7613	5.7482
neg_8452	Prolyl-Alanine	metab_15965	yes	-	neg	-	371.193	2.76653	2M-H	C8H14N2O3	0	52.2	HMDB0029010	-	-	-	-	-	Organic acids and derivatives	Carboxylic acids and derivatives	Amino acids, peptides, and analogues	0	52.2	-	-	1.0305	1.0262	0.002129	0.05188	5.4113	5.4282	5.3875	5.4292	5.4228	5.3699	5.3717	5.346	5.336	5.3869
neg_8463	Nelfinavir	metab_15977	yes	C07257	neg	159989-64-7	612.311	2.7419	M+FA-H	C32H45N3O4S	0	83.8	HMDB0014365	-	-	-	-	-	Organic acids and derivatives	Carboxylic acids and derivatives	Amino acids, peptides, and analogues	0	83.8	-	-	4.5355	4.4682	0.02239	0.1662	4.1747	3.5877	3.8038	3.9897	4.2694	3.5666	1.7671	3.0251	3.6133	1.7771
neg_8515	Phenylalanylaspartic acid	metab_16035	yes	-	neg	22828-05-3	279.099	2.6774	M-H	C13H16N2O5	0	33.4	HMDB0028991	-	-	-	-	-	Organic acids and derivatives	Carboxylic acids and derivatives	Amino acids, peptides, and analogues	0	33.4	-	-	1.0768	1.0644	0.008778	0.103	5.0404	5.0243	5.0374	5.0195	5.0855	4.9835	4.9544	4.9381	5.0142	5.0008
neg_8574	N-Succinyl-ala-ala-pro-phe-p-nitroanilide	metab_16098	yes	-	neg	-	623.243	2.60557	M-H	C30H36N6O9	0	40.8	HMDB0247308	-	-	-	-	-	Organic acids and derivatives	Carboxylic acids and derivatives	Amino acids, peptides, and analogues	0	40.8	-	-	1.6783	1.6688	0.005997	0.08598	4.6806	4.6391	4.8077	4.7399	4.6677	4.5639	4.5015	4.6556	4.516	4.5495
neg_8652	Valylhydroxyproline	metab_16182	yes	-	neg	90965-79-0	519.266	2.50053	2M+Hac-H	C10H18N2O4	0	52.6	HMDB0029128	-	-	-	-	-	Organic acids and derivatives	Carboxylic acids and derivatives	Amino acids, peptides, and analogues	0	52.6	-	-	5.5574	5.5211	3.431e-05	0.008178	3.9692	3.8912	4.8043	4.0824	3.9777	5.5592	5.5322	5.5537	5.5048	5.5198
neg_8657	Glycyl-leucine	metab_16187	yes	C02155	neg	869-19-2	187.108	2.50053	M-H	C8H16N2O3	91.6	0	HMDB0000759;MJDBOTE0000578	-	-	-	-	-	Organic acids and derivatives	Carboxylic acids and derivatives	Amino acids, peptides, and analogues	91.6	0	-	-	1.1021	1.0978	0.003708	0.06846	6.1465	6.1796	6.1583	6.1578	6.1753	6.084	6.081	6.0869	6.0915	6.1574
neg_8676	Glutaminylisoleucine	metab_16208	yes	-	neg	86416-45-7	258.146	2.47653	M-H	C11H21N3O4	0	46.4	HMDB0028800	-	-	-	-	-	Organic acids and derivatives	Carboxylic acids and derivatives	Amino acids, peptides, and analogues	0	46.4	-	-	1.0276	1.0225	0.007556	0.09588	5.5617	5.5886	5.5682	5.5414	5.5554	5.5119	5.4783	5.4818	5.4986	5.5571
neg_8800	MURABUTIDE	metab_16347	yes	-	neg	-	583.237	2.308	M+Cl	C23H40N4O11	0	37.7	HMDB0254948	-	-	-	-	-	Organic acids and derivatives	Carboxylic acids and derivatives	Amino acids, peptides, and analogues	0	37.7	-	-	2.5062	2.484	0.00805	0.09822	4.9209	4.9629	4.8706	4.7129	4.931	4.5108	4.7622	4.2582	4.6758	4.4821
neg_8877	Beta-Casomorphin-5	metab_16431	yes	-	neg	-	614.242	2.24407	M+Cl	C30H37N5O7	0	82.6	HMDB0249107	-	-	-	-	-	Organic acids and derivatives	Carboxylic acids and derivatives	Amino acids, peptides, and analogues	0	82.6	-	-	1.2106	1.2039	0.00984	0.1095	5.5305	5.5408	5.5056	5.5727	5.5836	5.471	5.4263	5.4362	5.4562	5.5371
neg_9179	Glutaminylvaline	metab_16754	yes	-	neg	31189-73-8	244.13	1.86747	M-H	C10H19N3O4	0	37.9	HMDB0028810	-	-	-	-	-	Organic acids and derivatives	Carboxylic acids and derivatives	Amino acids, peptides, and analogues	0	37.9	-	-	1.0514	1.0433	0.0005284	0.02661	5.4858	5.4988	5.4852	5.4957	5.4942	5.4497	5.4154	5.4308	5.4325	5.4682
neg_9266	3-Aminoisobutanoic Acid	metab_16846	yes	C05145	neg	144-90-1	102.055	1.68317	M-H	C4H9NO2	31.5	0	PW_C001993;HMDB0003911;MJDBOTE0000609	Peptides	Amino acids	-	-	-	Organic acids and derivatives	Carboxylic acids and derivatives	Amino acids, peptides, and analogues	31.5	0	-	-	1.5846	1.5738	0.00162	0.04387	4.1832	4.2059	4.2059	4.1853	4.1828	4.0774	4.089	4.0017	4.0211	4.1495
neg_9845	Glutamyllysine	metab_17433	yes	-	neg	5891-53-2	256.13	0.62485	M-H2O-H	C11H21N3O5	0	33.8	HMDB0004207	-	-	-	-	-	Organic acids and derivatives	Carboxylic acids and derivatives	Amino acids, peptides, and analogues	0	33.8	-	-	1.0704	1.0542	0.001335	0.04003	4.8435	4.8658	4.8412	4.8293	4.8613	4.8954	4.9377	4.9073	4.8821	4.8966
neg_9902	L-Glutamine	metab_17495	yes	C00064	neg	56-85-9;5959-95-5	145.061	0.608917	M-H	C5H10N2O3	0	77.8	HMDB0003423;HMDB0000641;PW_C000500;MJDBOTE0000775	Peptides	Amino acids	map00470;map00230;map01240;map00250;map02020;map00750;map00630;map04964;map02010;map04727;map04724;map01060;map01100;map00220;map01120;map01232;map01230;map00240;map04978;map00910;map04974;map00970;map05230	Metabolism;Metabolism;Metabolism;Metabolism;Environmental Information Processing;Metabolism;Metabolism;Organismal Systems;Environmental Information Processing;Organismal Systems;Organismal Systems;Metabolism;Metabolism;Metabolism;Metabolism;Metabolism;Metabolism;Metabolism;Organismal Systems;Metabolism;Organismal Systems;Genetic Information Processing;Human Diseases	Metabolism of other amino acids;Nucleotide metabolism;Global and overview maps;Amino acid metabolism;Signal transduction;Metabolism of cofactors and vitamins;Carbohydrate metabolism;Excretory system;Membrane transport;Nervous system;Nervous system;Chemical structure transformation maps;Global and overview maps;Amino acid metabolism;Global and overview maps;Global and overview maps;Global and over…	Organic acids and derivatives	Carboxylic acids and derivatives	Amino acids, peptides, and analogues	0	77.8	D-Amino acid metabolism;Purine metabolism;Biosynthesis of cofactors;Alanine, aspartate and glutamate metabolism;Two-component system;Vitamin B6 metabolism;Glyoxylate and dicarboxylate metabolism;Proximal tubule bicarbonate reclamation;ABC transporters;GABAergic synapse;Glutamatergic synapse;Biosynthesis of plant secondary metabolites;Metabolic pathways;Arginine biosynthesis;Microbial metabolism i…	D-Amino acid metabolism;Purine metabolism;Biosynthesis of cofactors;Alanine, aspartate and glutamate metabolism;Two-component system;Vitamin B6 metabolism;Glyoxylate and dicarboxylate metabolism;Proximal tubule bicarbonate reclamation;ABC transporters;GABAergic synapse;Glutamatergic synapse;Biosynthesis of plant secondary metabolites;Metabolic pathways;Arginine biosynthesis;Microbial metabolism i…	1.2695	1.2617	0.0002794	0.02007	5.5478	5.5953	5.5768	5.5628	5.5583	5.4956	5.5026	5.4726	5.4721	5.5201
neg_9980	L-Histidine	metab_17575	yes	C00135	neg	71-00-1	154.061	0.552333	M-H	C6H9N3O2	71.8	0	HMDB0000177;PW_C000116;MJDBOTE0000427	Peptides	Amino acids	map01100;map01110;map02010;map00340;map00470;map01230;map04974;map00970;map01065;map05230;map00410;map00404;map01060	Metabolism;Metabolism;Environmental Information Processing;Metabolism;Metabolism;Metabolism;Organismal Systems;Genetic Information Processing;Metabolism;Human Diseases;Metabolism;Metabolism;Metabolism	Global and overview maps;Global and overview maps;Membrane transport;Amino acid metabolism;Metabolism of other amino acids;Global and overview maps;Digestive system;Translation;Chemical structure transformation maps;Cancer: overview;Metabolism of other amino acids;Biosynthesis of other secondary metabolites;Chemical structure transformation maps	Organic acids and derivatives	Carboxylic acids and derivatives	Amino acids, peptides, and analogues	71.8	0	Metabolic pathways;Biosynthesis of secondary metabolites;ABC transporters;Histidine metabolism;D-Amino acid metabolism;Biosynthesis of amino acids;Protein digestion and absorption;Aminoacyl-tRNA biosynthesis;Biosynthesis of alkaloids derived from histidine and purine;Central carbon metabolism in cancer;beta-Alanine metabolism;Staurosporine biosynthesis;Biosynthesis of plant secondary metabolites	Metabolic pathways;Biosynthesis of secondary metabolites;ABC transporters;Histidine metabolism;D-Amino acid metabolism;Biosynthesis of amino acids;Protein digestion and absorption;Aminoacyl-tRNA biosynthesis;Biosynthesis of alkaloids derived from histidine and purine;Central carbon metabolism in cancer;beta-Alanine metabolism;Staurosporine biosynthesis;Biosynthesis of plant secondary metabolites	4.494	4.4429	0.0004385	0.0255	4.4521	4.7284	4.5062	4.6115	5.1511	5.2364	5.6677	5.6647	5.7261	5.8955
pos_1122	N-a-Acetyl-L-arginine	metab_135	yes	-	pos	155-84-0	258.156	0.615283	M+Na, M+ACN+H	C8H16N4O3	0	44.8	HMDB0004620	-	-	-	-	-	Organic acids and derivatives	Carboxylic acids and derivatives	Amino acids, peptides, and analogues	0	44.8	-	-	1.0626	1.0631	0.02562	0.2547	5.3292	5.3772	5.3001	5.3703	5.2778	5.4194	5.3824	5.3753	5.3877	5.3763
pos_1446	Prolyl-Arginine	metab_487	yes	-	pos	-	272.171	0.623083	M+H	C11H21N5O3	0	76.3	HMDB0029011	-	-	-	-	-	Organic acids and derivatives	Carboxylic acids and derivatives	Amino acids, peptides, and analogues	0	76.3	-	-	1.3271	1.3269	0.01056	0.1613	6.1252	6.0799	6.1242	6.1451	6.1217	6.259	6.23	6.2081	6.1801	6.1288
pos_1489	Arginylproline	metab_532	yes	-	pos	2418-69-1	272.171	0.833433	M+H	C11H21N5O3	0	63.9	HMDB0028717	-	-	-	-	-	Organic acids and derivatives	Carboxylic acids and derivatives	Amino acids, peptides, and analogues	0	63.9	-	-	1.3442	1.3462	0.007325	0.1328	6.4723	6.4484	6.5149	6.4531	6.451	6.6018	6.57	6.5674	6.5087	6.5016
pos_1491	Prolylhydroxyproline	metab_535	yes	-	pos	18684-24-7	229.118	0.8491	M+H	C10H16N2O4	61.5	0	HMDB0256781;HMDB0006695	-	-	-	-	-	Organic acids and derivatives	Carboxylic acids and derivatives	Amino acids, peptides, and analogues	61.5	0	-	-	2.2279	2.2221	9.165e-05	0.01289	6.1357	6.2478	6.1722	6.089	6.1601	5.9742	5.9748	5.9679	5.9686	5.9796
pos_1705	N-(N-(3-Amino-3-carboxypropyl)-3-amino-3-carboxypropyl)azetidine-2-carboxylic acid	metab_760	yes	-	pos	-	286.139	1.71937	M+H-H2O	C12H21N3O6	0	64	HMDB0255025	-	-	-	-	-	Organic acids and derivatives	Carboxylic acids and derivatives	Amino acids, peptides, and analogues	0	64	-	-	1.0794	1.0771	0.007167	0.1318	6.0256	6.0134	6.0277	6.0577	6.0344	6.0116	5.9754	5.9589	5.9466	6.0048
pos_1733	Gamma-L-Glutamyl-L-methionine sulfoxide	metab_791	yes	-	pos	39015-69-5	277.085	1.75058	M+H-H2O	C10H18N2O6S	0	36.1	HMDB0038613	-	-	-	-	-	Organic acids and derivatives	Carboxylic acids and derivatives	Amino acids, peptides, and analogues	0	36.1	-	-	1.091	1.0872	0.0005254	0.03221	5.8966	5.9132	5.9026	5.8931	5.8973	5.8647	5.8379	5.8591	5.8336	5.8728
pos_1734	Melanostatin	metab_792	yes	-	pos	9083-38-9	317.218	1.75058	M+CH3OH+H	C13H24N4O3	0	40.9	HMDB0005764;HMDB0254713	-	-	-	-	-	Organic acids and derivatives	Carboxylic acids and derivatives	Amino acids, peptides, and analogues	0	40.9	-	-	1.0387	1.0316	0.006538	0.1274	6.0941	6.0908	6.0812	6.0597	6.0941	6.0774	6.029	6.0416	6.0121	6.0213
pos_1898	DL-Buthionine sulfoximine	metab_969	yes	C04543	pos	-	245.095	1.922	M+Na	C8H18N2O3S	0	32.7	HMDB0251513;HMDB0249462	-	-	-	-	-	Organic acids and derivatives	Carboxylic acids and derivatives	Amino acids, peptides, and analogues	0	32.7	-	-	1.1389	1.1376	0.004288	0.1012	6.1006	6.1122	6.0874	6.0969	6.0624	6.0244	6.0363	6.0032	6.0396	6.0742
pos_2017	Ala-Leu	metab_1093	yes	-	pos	3303-34-2	203.139	2.13158	M+H	C9H18N2O3	77.7	0	HMDB0251509;HMDB0028691	-	-	-	-	-	Organic acids and derivatives	Carboxylic acids and derivatives	Amino acids, peptides, and analogues	77.7	0	-	-	1.3884	1.3884	0.01876	0.2191	5.9936	6.0247	5.9484	5.9445	5.9867	5.8574	5.8593	5.8304	5.884	5.9938
pos_2067	N-Docosahexaenoyl Alanine	metab_1146	yes	-	pos	-	444.245	2.21723	M+2Na-H	C25H37NO3	0	31.6	HMDB0242007	-	-	-	-	-	Organic acids and derivatives	Carboxylic acids and derivatives	Amino acids, peptides, and analogues	0	31.6	-	-	1.2391	1.2363	0.03959	0.3064	5.7166	5.6494	5.5663	5.6216	5.6915	5.5683	5.5928	5.4911	5.6142	5.566
pos_2181	Carbocysteine-lysine	metab_1271	yes	-	pos	-	330.111	2.40453	M+Na	C11H21N3O5S	0	60.6	HMDB0249634	-	-	-	-	-	Organic acids and derivatives	Carboxylic acids and derivatives	Amino acids, peptides, and analogues	0	60.6	-	-	1.7353	1.7331	0.002143	0.06954	4.8883	4.9378	4.9621	4.9949	4.9548	4.8213	4.7891	4.7714	4.9014	4.8241
pos_2288	Met-leu-phe	metab_1383	yes	-	pos	-	374.192	2.59925	M+H-2H2O	C20H31N3O4S	0	47.4	HMDB0254492	-	-	-	-	-	Organic acids and derivatives	Carboxylic acids and derivatives	Amino acids, peptides, and analogues	0	47.4	-	-	1.9194	1.9162	0.0003485	0.02644	5.3288	5.2821	5.2449	5.2661	5.2639	5.0935	5.1624	5.1048	5.1086	5.1959
pos_23	Glutamylproline	metab_1396	yes	-	pos	41745-47-5	286.139	0.623083	M+H, M+NH4, M+ACN+H, M+ACN+Na, M+H-2H2O	C10H16N2O5	0	44.9	HMDB0028827	-	-	-	-	-	Organic acids and derivatives	Carboxylic acids and derivatives	Amino acids, peptides, and analogues	0	44.9	-	-	1.0818	1.0812	0.01582	0.2019	6.5024	6.4703	6.509	6.5607	6.5354	6.4789	6.4845	6.4273	6.4558	6.449
pos_2304	N-Acetylaspartylglutamic acid	metab_1402	yes	C12270	pos	3106-85-2	305.098	2.6227	M+H	C11H16N2O8	0	61.3	HMDB0001067	-	-	map01100;map04080;map00250	Metabolism;Environmental Information Processing;Metabolism	Global and overview maps;Signaling molecules and interaction;Amino acid metabolism	Organic acids and derivatives	Carboxylic acids and derivatives	Amino acids, peptides, and analogues	0	61.3	Metabolic pathways;Neuroactive ligand-receptor interaction;Alanine, aspartate and glutamate metabolism	Metabolic pathways;Neuroactive ligand-receptor interaction;Alanine, aspartate and glutamate metabolism	1.4919	1.4834	0.00519	0.1139	5.7059	5.7042	5.6272	5.6088	5.6892	5.6127	5.5573	5.5723	5.5863	5.521
pos_2486	Prolyl-Lysine	metab_1602	yes	-	pos	-	285.192	2.98183	M+ACN+H	C11H21N3O3	0	75.8	HMDB0029022	-	-	-	-	-	Organic acids and derivatives	Carboxylic acids and derivatives	Amino acids, peptides, and analogues	0	75.8	-	-	1.3628	1.3624	0.0008794	0.0452	5.7818	5.8155	5.7445	5.7951	5.8115	5.707	5.6937	5.7178	5.7188	5.7358
pos_255	Gamma-Glutamylacetamide	metab_1668	yes	-	pos	-	189.087	0.592	M+H, M+K, M+Na	C7H12N2O4	0	33.8	HMDB0252618	-	-	-	-	-	Organic acids and derivatives	Carboxylic acids and derivatives	Amino acids, peptides, and analogues	0	33.8	-	-	1.2217	1.2196	0.0003913	0.02673	5.8992	5.9187	5.9326	5.9288	5.9182	5.8692	5.8796	5.8364	5.8724	5.8471
pos_2580	L-phenylalanyl-L-proline	metab_1700	yes	-	pos	7669-65-0	263.139	3.23903	M+H	C14H18N2O3	89.6	0	HMDB0011177	-	-	-	-	-	Organic acids and derivatives	Carboxylic acids and derivatives	Amino acids, peptides, and analogues	89.6	0	-	-	1.0356	1.0303	0.0005387	0.03247	7.0395	7.0471	7.0411	7.027	7.0497	7.0173	6.9833	6.9922	7.0105	6.9899
pos_2833	Asn-Arg-Ala-Ile	metab_1957	yes	-	pos	-	486.285	4.14577	2M+3H2O+2H	C19H36N8O6	0	59.4	HMDB0304797	-	-	-	-	-	Organic acids and derivatives	Carboxylic acids and derivatives	Amino acids, peptides, and analogues	0	59.4	-	-	1.0519	1.0525	0.04436	0.314	6.0346	5.9799	5.9985	6.0723	6.0114	5.9451	5.9727	5.9884	5.9992	5.8884
pos_3316	5-Aminolevulinic Acid	metab_2479	yes	C00430	pos	106-60-5	114.055	5.61357	M+H-H2O	C5H9NO3	49.5	0	HMDB0001149;PW_C000894;MJDBOTE0001053	-	-	map01100;map01110;map01120;map01240;map02010;map00860;map00260;map01060	Metabolism;Metabolism;Metabolism;Metabolism;Environmental Information Processing;Metabolism;Metabolism;Metabolism	Global and overview maps;Global and overview maps;Global and overview maps;Global and overview maps;Membrane transport;Metabolism of cofactors and vitamins;Amino acid metabolism;Chemical structure transformation maps	Organic acids and derivatives	Carboxylic acids and derivatives	Amino acids, peptides, and analogues	49.5	0	Metabolic pathways;Biosynthesis of secondary metabolites;Microbial metabolism in diverse environments;Biosynthesis of cofactors;ABC transporters;Porphyrin metabolism;Glycine, serine and threonine metabolism;Biosynthesis of plant secondary metabolites	Metabolic pathways;Biosynthesis of secondary metabolites;Microbial metabolism in diverse environments;Biosynthesis of cofactors;ABC transporters;Porphyrin metabolism;Glycine, serine and threonine metabolism;Biosynthesis of plant secondary metabolites	2.4258	2.4155	8.281e-06	0.003641	4.8604	4.9027	4.877	4.9172	4.8565	5.0492	5.1107	5.0993	5.0735	5.1547
pos_3817	1-Aminocyclohexanecarboxylic acid	metab_3028	yes	-	pos	2756-56-1	144.102	7.29758	M+H	C7H13NO2	44.3	0	HMDB0243822;HMDB0038249	-	-	-	-	-	Organic acids and derivatives	Carboxylic acids and derivatives	Amino acids, peptides, and analogues	44.3	0	-	-	1.1007	1.0972	5.049e-05	0.009286	5.7559	5.7596	5.7717	5.7624	5.7736	5.8051	5.8058	5.8018	5.828	5.8091
pos_4591	N-Stearoyl Glutamine	metab_3875	yes	-	pos	-	395.326	5.77788	M+H-H2O	C23H44N2O4	0	62.6	HMDB0241941;LMFA08020130	-	-	-	-	-	Organic acids and derivatives	Carboxylic acids and derivatives	Amino acids, peptides, and analogues	0	62.6	-	-	2.1698	2.1592	0.0008976	0.0452	5.4265	5.4746	5.3603	5.4051	5.5058	5.5519	5.5793	5.6225	5.6924	5.6695
pos_472	1-Acetylproline	metab_4018	yes	-	pos	-	158.081	2.0537	M+H, M+NH4	C7H11NO3	0	36.4	HMDB0242126	-	-	-	-	-	Organic acids and derivatives	Carboxylic acids and derivatives	Amino acids, peptides, and analogues	0	36.4	-	-	1.4479	1.4435	0.003806	0.09381	5.8851	5.9009	5.8194	5.8163	5.8663	5.7546	5.7633	5.7739	5.8167	5.7285
pos_5669	Bucillamine	metab_5018	yes	-	pos	-	206.03	3.47252	M+H-H2O	C7H13NO3S2	0	35.8	HMDB0249419	-	-	-	-	-	Organic acids and derivatives	Carboxylic acids and derivatives	Amino acids, peptides, and analogues	0	35.8	-	-	1.1609	1.1628	0.006567	0.1276	5.5612	5.5929	5.5534	5.5744	5.5921	5.4908	5.5399	5.5558	5.4787	5.5057
pos_5764	Plazomicin	metab_5111	yes	-	pos	-	557.329	3.17687	M+H-2H2O	C25H48N6O10	0	51.1	HMDB0256636	-	-	-	-	-	Organic acids and derivatives	Carboxylic acids and derivatives	Amino acids, peptides, and analogues	0	51.1	-	-	1.774	1.7712	0.007147	0.1318	5.493	5.376	5.3887	5.4755	5.3925	5.5031	5.5415	5.6151	5.662	5.5111
pos_5891	Etelcalcetide	metab_5243	yes	-	pos	-	524.774	2.94282	M+2H	C38H73N21O10S2	0	50.7	HMDB0251992	-	-	-	-	-	Organic acids and derivatives	Carboxylic acids and derivatives	Amino acids, peptides, and analogues	0	50.7	-	-	1.1638	1.1564	0.00324	0.08552	6.0476	6.0084	6.0164	6.0174	6.0315	5.9904	5.9458	5.9537	6.001	5.9435
pos_5907	Merodesmosine	metab_5261	yes	-	pos	17096-97-8	385.244	2.92718	M+H-H2O	C18H34N4O6	0	63.7	HMDB0030407	-	-	-	-	-	Organic acids and derivatives	Carboxylic acids and derivatives	Amino acids, peptides, and analogues	0	63.7	-	-	1.0224	1.026	0.04668	0.314	6.5977	6.5678	6.5267	6.5305	6.5384	6.657	6.6123	6.6233	6.6277	6.5325
pos_5954	Glycyl-proline-1-naphthylamide	metab_5309	yes	-	pos	-	612.334	2.84918	2M+NH4	C17H19N3O2	0	58.1	HMDB0252835	-	-	-	-	-	Organic acids and derivatives	Carboxylic acids and derivatives	Amino acids, peptides, and analogues	0	58.1	-	-	1.9808	1.9841	0.001919	0.06642	6.0003	5.894	5.9422	5.8532	5.9176	6.132	6.0799	6.0918	6.1369	5.9887
pos_596	(3s)-3-(Benzyloxy)-L-Aspartic Acid	metab_5315	yes	-	pos	-	281.113	2.73993	M+NH4, M+ACN+H	C11H13NO5	0	45	HMDB0250058	-	-	-	-	-	Organic acids and derivatives	Carboxylic acids and derivatives	Amino acids, peptides, and analogues	0	45	-	-	1.129	1.1319	0.0332	0.2815	5.1959	5.2037	5.207	5.1552	5.2382	5.0671	5.1211	5.2078	5.1305	5.1379
pos_6100	5-Hydroxyindoleacetylglycine	metab_5471	yes	C05832	pos	-	281.113	2.6227	M+CH3OH+H	C12H12N2O4	0	50	HMDB0004185	-	-	map00380	Metabolism	Amino acid metabolism	Organic acids and derivatives	Carboxylic acids and derivatives	Amino acids, peptides, and analogues	0	50	Tryptophan metabolism	Tryptophan metabolism	1.3008	1.2966	0.002488	0.07532	5.6102	5.6091	5.5932	5.5753	5.5856	5.4953	5.4848	5.5279	5.5453	5.5645
pos_6146	Phenylalanylthreonine	metab_5520	yes	-	pos	51352-44-4	267.134	2.5603	M+H	C13H18N2O4	0	42.3	HMDB0029005	-	-	-	-	-	Organic acids and derivatives	Carboxylic acids and derivatives	Amino acids, peptides, and analogues	0	42.3	-	-	1.384	1.3823	0.01517	0.1971	5.3521	5.3807	5.3578	5.2854	5.3899	5.26	5.2875	5.1801	5.2561	5.3228
pos_6213	N-Acetyl-1-aspartylglutamic acid	metab_5593	yes	C12270	pos	3106-85-2	305.098	2.45918	M+H	C11H16N2O8	0	57.3	HMDB0255414;HMDB0001067	-	-	map01100;map04080;map00250	Metabolism;Environmental Information Processing;Metabolism	Global and overview maps;Signaling molecules and interaction;Amino acid metabolism	Organic acids and derivatives	Carboxylic acids and derivatives	Amino acids, peptides, and analogues	0	57.3	Metabolic pathways;Neuroactive ligand-receptor interaction;Alanine, aspartate and glutamate metabolism	Metabolic pathways;Neuroactive ligand-receptor interaction;Alanine, aspartate and glutamate metabolism	1.6822	1.6775	0.001099	0.04958	5.3296	5.3707	5.264	5.2921	5.2958	5.2238	5.1835	5.1468	5.218	5.2069
pos_6290	L-Threo-3-Phenylserine	metab_5677	yes	C03290	pos	6254-48-4	223.107	2.37332	M+ACN+H	C9H11NO3	0	67.3	HMDB0002184	-	-	-	-	-	Organic acids and derivatives	Carboxylic acids and derivatives	Amino acids, peptides, and analogues	0	67.3	-	-	1.2509	1.2498	0.005567	0.1175	6.645	6.7036	6.6416	6.6229	6.6595	6.5837	6.5712	6.5602	6.5792	6.6324
pos_6360	L-Valine, N-(2-hydroxy-3-butenyl)-	metab_5753	yes	-	pos	-	229.154	2.28742	M+ACN+H	C9H17NO3	0	45.4	HMDB0253927	-	-	-	-	-	Organic acids and derivatives	Carboxylic acids and derivatives	Amino acids, peptides, and analogues	0	45.4	-	-	1.1447	1.1413	2.005e-05	0.00597	7.8941	7.8941	7.8827	7.8823	7.8954	7.8405	7.8285	7.8351	7.8479	7.8544
pos_6437	(2S)-1-[2-[[(2S)-Pyrrolidine-2-carbonyl]amino]acetyl]pyrrolidine-2-carboxylic Acid	metab_5838	yes	-	pos	-	539.282	2.18603	2M+H	C12H19N3O4	0	78	HMDB0260136	-	-	-	-	-	Organic acids and derivatives	Carboxylic acids and derivatives	Amino acids, peptides, and analogues	0	78	-	-	1.2079	1.2077	0.004959	0.1118	6.1694	6.2478	6.2008	6.2258	6.1973	6.1407	6.1143	6.1632	6.1327	6.1693
pos_6460	L-Proline, 1-(1-L-leucyl-L-prolyl)-	metab_5863	yes	-	pos	-	326.207	2.15492	M+H	C16H27N3O4	0	70.6	HMDB0253022	-	-	-	-	-	Organic acids and derivatives	Carboxylic acids and derivatives	Amino acids, peptides, and analogues	0	70.6	-	-	1.2444	1.243	0.0003106	0.02503	6.1865	6.2244	6.192	6.1869	6.1865	6.1239	6.1465	6.1522	6.1157	6.1357
pos_6462	Glycylleucine	metab_5865	yes	C02155	pos	869-19-2	189.123	2.15492	M+H	C8H16N2O3	0	43.1	HMDB0000759;HMDB0028929	-	-	-	-	-	Organic acids and derivatives	Carboxylic acids and derivatives	Amino acids, peptides, and analogues	0	43.1	-	-	1.5104	1.5077	2.586e-05	0.006683	7.3258	7.3366	7.3189	7.3313	7.3344	7.2383	7.2287	7.2361	7.2388	7.2812
pos_6467	Trans-4-Hydroxy-L-proline	metab_5869	yes	C01157	pos	51-35-4	132.065	2.14708	M+H	C5H9NO3	44	0	HMDB0000725	Peptides	Amino acids	map01100;map00470;map00330;map02010	Metabolism;Metabolism;Metabolism;Environmental Information Processing	Global and overview maps;Metabolism of other amino acids;Amino acid metabolism;Membrane transport	Organic acids and derivatives	Carboxylic acids and derivatives	Amino acids, peptides, and analogues	44	0	Metabolic pathways;D-Amino acid metabolism;Arginine and proline metabolism;ABC transporters	Metabolic pathways;D-Amino acid metabolism;Arginine and proline metabolism;ABC transporters	1.173	1.1699	0.002993	0.08328	6.584	6.5564	6.6012	6.6149	6.5958	6.5455	6.5234	6.5168	6.5108	6.5635
pos_6488	Tyrosyl-Proline	metab_5889	yes	-	pos	-	279.134	2.12377	M+H	C14H18N2O4	0	54.7	HMDB0029113	-	-	-	-	-	Organic acids and derivatives	Carboxylic acids and derivatives	Amino acids, peptides, and analogues	0	54.7	-	-	1.34	1.3378	0.0001841	0.01761	7.5559	7.5483	7.5622	7.5752	7.5813	7.4904	7.4775	7.4849	7.4967	7.5278
pos_6561	Histidylvaline	metab_5968	yes	-	pos	76019-15-3	277.125	2.03807	M+Na	C11H18N4O3	0	76	HMDB0028898	-	-	-	-	-	Organic acids and derivatives	Carboxylic acids and derivatives	Amino acids, peptides, and analogues	0	76	-	-	1.5168	1.5171	0.01121	0.1657	5.2066	5.2629	5.2736	5.2117	5.1909	5.0396	5.1446	5.188	5.0704	5.1649
pos_6582	Trypanothione disulfide	metab_5987	yes	C03170	pos	96304-42-6	739.325	2.01488	M+NH4	C27H47N9O10S2	0	82.8	HMDB0060521	-	-	map01100;map00480	Metabolism;Metabolism	Global and overview maps;Metabolism of other amino acids	Organic acids and derivatives	Carboxylic acids and derivatives	Amino acids, peptides, and analogues	0	82.8	Metabolic pathways;Glutathione metabolism	Metabolic pathways;Glutathione metabolism	2.0848	2.0858	0.04799	0.314	5.0547	5.2262	5.3866	5.2506	5.4291	5.1204	5.2242	4.7437	5.0376	5.0098
pos_6746	Hexanoylglutamine	metab_6154	yes	-	pos	-	245.149	1.90642	M+H	C11H20N2O4	0	35.8	HMDB0242182	-	-	-	-	-	Organic acids and derivatives	Carboxylic acids and derivatives	Amino acids, peptides, and analogues	0	35.8	-	-	1.6808	1.6777	8.836e-05	0.01289	7.3319	7.3278	7.3507	7.3757	7.3872	7.265	7.2346	7.2363	7.2287	7.2732
pos_6859	N(2)-phenylacetyl-L-glutaminate	metab_6277	yes	C05597	pos	-	529.224	1.7661	2M+H	C13H16N2O4	0	47.7	HMDB0062645	-	-	-	-	-	Organic acids and derivatives	Carboxylic acids and derivatives	Amino acids, peptides, and analogues	0	47.7	-	-	1.7329	1.7343	0.04019	0.3075	5.5399	5.5309	5.4111	5.6367	5.6341	5.4163	5.456	5.4372	5.4485	5.1818
pos_6876	Pro-Pro-Pro	metab_6296	yes	-	pos	-	310.176	1.7661	M+H	C15H23N3O4	0	53.7	HMDB0256689	-	-	-	-	-	Organic acids and derivatives	Carboxylic acids and derivatives	Amino acids, peptides, and analogues	0	53.7	-	-	1.386	1.3798	0.0001778	0.01747	6.3459	6.3209	6.3259	6.3231	6.3495	6.2908	6.2444	6.2425	6.2484	6.272
pos_6962	L-3-Aminodihydro-2(3H)-furanone	metab_6391	yes	C02926	pos	-	244.129	1.74277	2M+ACN+H	C4H7NO2	0	38.4	HMDB0029387	-	-	-	-	-	Organic acids and derivatives	Carboxylic acids and derivatives	Amino acids, peptides, and analogues	0	38.4	-	-	1.2036	1.2006	0.0007904	0.04361	5.7683	5.7932	5.7707	5.7571	5.7795	5.7162	5.7198	5.7462	5.7074	5.6889
pos_7096	N2-Acetylornithine	metab_6531	yes	C00437	pos	6205-08-09	175.108	1.47988	M+H	C7H14N2O3	0	49.7	HMDB0003357	-	-	map01100;map01210;map00220;map01110;map01230	Metabolism;Metabolism;Metabolism;Metabolism;Metabolism	Global and overview maps;Global and overview maps;Amino acid metabolism;Global and overview maps;Global and overview maps	Organic acids and derivatives	Carboxylic acids and derivatives	Amino acids, peptides, and analogues	0	49.7	Metabolic pathways;2-Oxocarboxylic acid metabolism;Arginine biosynthesis;Biosynthesis of secondary metabolites;Biosynthesis of amino acids	Metabolic pathways;2-Oxocarboxylic acid metabolism;Arginine biosynthesis;Biosynthesis of secondary metabolites;Biosynthesis of amino acids	1.5169	1.5164	0.0001651	0.01692	6.6669	6.693	6.641	6.6714	6.6603	6.553	6.5832	6.5623	6.5776	6.6135
pos_7120	Levetiracetam	metab_6557	yes	C07841	pos	102767-28-2	212.139	1.33308	M+ACN+H	C8H14N2O2	0	70.1	HMDB0015333;HMDB0252105	-	-	-	-	-	Organic acids and derivatives	Carboxylic acids and derivatives	Amino acids, peptides, and analogues	0	70.1	-	-	4.9408	4.9174	8.628e-06	0.003641	6.2357	6.0451	6.0601	5.932	5.8026	5.2736	5.0467	4.9872	5.2138	5.1013
pos_7155	Nopalinic acid	metab_6595	yes	C01683	pos	63409-16-5	245.113	1.22412	M+H-H2O	C10H18N2O6	0	50.9	HMDB0029437	-	-	-	-	-	Organic acids and derivatives	Carboxylic acids and derivatives	Amino acids, peptides, and analogues	0	50.9	-	-	1.4768	1.4688	0.002673	0.0789	5.3912	5.3666	5.3677	5.4016	5.4058	5.3607	5.2598	5.3202	5.2709	5.2634
pos_7215	N-Alpha-acetyllysine	metab_6660	yes	C12989	pos	1946-82-3	189.123	1.1069	M+H	C8H16N2O3	36.1	0	HMDB0000446	-	-	-	-	-	Organic acids and derivatives	Carboxylic acids and derivatives	Amino acids, peptides, and analogues	36.1	0	-	-	1.2448	1.2439	0.002821	0.08063	5.4882	5.5357	5.4731	5.4613	5.5236	5.4302	5.4425	5.4087	5.4323	5.4388
pos_7274	Linatine	metab_6719	yes	C05939	pos	10139-06-7	301.15	0.934883	M+ACN+H	C10H17N3O5	0	56.7	HMDB0038516	-	-	map00470	Metabolism	Metabolism of other amino acids	Organic acids and derivatives	Carboxylic acids and derivatives	Amino acids, peptides, and analogues	0	56.7	D-Amino acid metabolism	D-Amino acid metabolism	1.4432	1.4372	0.002025	0.06819	5.9459	5.9752	6	5.9537	5.9136	5.8845	5.845	5.8454	5.8693	5.9122
pos_7281	N(epsilon)-(Carboxymethyl)hydroxylysine	metab_6727	yes	-	pos	-	203.102	0.927067	M+H-H2O	C8H16N2O5	0	41.4	HMDB0250375	-	-	-	-	-	Organic acids and derivatives	Carboxylic acids and derivatives	Amino acids, peptides, and analogues	0	41.4	-	-	1.324	1.3172	7.643e-05	0.01218	6.0177	5.994	6.0177	5.9901	6.0191	5.9654	5.939	5.9375	5.9386	5.9291
pos_7433	5-Aminopentanamide	metab_6881	yes	C00990	pos	13023-70-6	99.0919	0.630917	M+H-H2O	C5H12N2O	0	41.7	HMDB0012176	-	-	map01100;map00310;map01120	Metabolism;Metabolism;Metabolism	Global and overview maps;Amino acid metabolism;Global and overview maps	Organic acids and derivatives	Carboxylic acids and derivatives	Amino acids, peptides, and analogues	0	41.7	Metabolic pathways;Lysine degradation;Microbial metabolism in diverse environments	Metabolic pathways;Lysine degradation;Microbial metabolism in diverse environments	1.4316	1.4229	0.008312	0.14	5.3778	5.4366	5.4541	5.5119	5.5158	5.5661	5.5437	5.5581	5.5621	5.5284
pos_7436	Glycylprolylarginine	metab_6883	yes	-	pos	-	329.193	0.623083	M+H	C13H24N6O4	0	78.2	HMDB0252828	-	-	-	-	-	Organic acids and derivatives	Carboxylic acids and derivatives	Amino acids, peptides, and analogues	0	78.2	-	-	1.1113	1.1115	0.001012	0.04766	6.3544	6.318	6.3313	6.3141	6.3392	6.3867	6.3767	6.3721	6.4056	6.3672
pos_7681	5-Hydroxylysine	metab_7148	yes	C16741	pos	1190-94-9	163.108	0.467433	M+H	C6H14N2O3	89.9	0	HMDB0245508;HMDB0000450	-	-	map01100;map00310	Metabolism;Metabolism	Global and overview maps;Amino acid metabolism	Organic acids and derivatives	Carboxylic acids and derivatives	Amino acids, peptides, and analogues	89.9	0	Metabolic pathways;Lysine degradation	Metabolic pathways;Lysine degradation	1.2519	1.2487	0.008476	0.1407	4.7833	4.7321	4.7691	4.7138	4.7478	4.6576	4.7394	4.6696	4.6782	4.6453
pos_7686	DL-Ornithino-L-alanine	metab_7153	yes	-	pos	25693-39-4	220.129	0.459617	M+H	C8H17N3O4	0	39	HMDB0029448	-	-	-	-	-	Organic acids and derivatives	Carboxylic acids and derivatives	Amino acids, peptides, and analogues	0	39	-	-	1.9317	1.9268	0.001926	0.06642	4.8308	4.6967	4.7237	4.7852	4.841	4.6175	4.6244	4.5725	4.6868	4.6011
pos_7699	Lysyl-Lysine	metab_7167	yes	-	pos	13184-13-9	138.107	0.436233	M+2H	C12H26N4O3	0	36.6	HMDB0304785;HMDB0028956	-	-	-	-	-	Organic acids and derivatives	Carboxylic acids and derivatives	Amino acids, peptides, and analogues	0	36.6	-	-	2.0072	2.0076	0.0003185	0.0251	5.1065	5.1147	5.1578	5.0751	5.1202	5.3477	5.248	5.3018	5.232	5.2339
pos_80	L-Methionine	metab_7266	yes	C00073	pos	63-68-3;59-51-8	150.058	0.973967	M+Na, M+K, M+2Na-H, M+H	C5H11NO2S	97	0	HMDB0000696;PW_C000548;HMDB0033951;MJDBOTE0001368	Peptides	Amino acids	map01100;map04978;map01110;map01240;map01210;map00270;map00470;map00999;map01230;map00966;map04974;map00970;map01523;map05230;map01070;map01060	Metabolism;Organismal Systems;Metabolism;Metabolism;Metabolism;Metabolism;Metabolism;Metabolism;Metabolism;Metabolism;Organismal Systems;Genetic Information Processing;Human Diseases;Human Diseases;Metabolism;Metabolism	Global and overview maps;Digestive system;Global and overview maps;Global and overview maps;Global and overview maps;Amino acid metabolism;Metabolism of other amino acids;Biosynthesis of other secondary metabolites;Global and overview maps;Biosynthesis of other secondary metabolites;Digestive system;Translation;Drug resistance: antineoplastic;Cancer: overview;Chemical structure transformation map…	Organic acids and derivatives	Carboxylic acids and derivatives	Amino acids, peptides, and analogues	97	0	Metabolic pathways;Mineral absorption;Biosynthesis of secondary metabolites;Biosynthesis of cofactors;2-Oxocarboxylic acid metabolism;Cysteine and methionine metabolism;D-Amino acid metabolism;Biosynthesis of various plant secondary metabolites;Biosynthesis of amino acids;Glucosinolate biosynthesis;Protein digestion and absorption;Aminoacyl-tRNA biosynthesis;Antifolate resistance;Central carbon m…	Metabolic pathways;Mineral absorption;Biosynthesis of secondary metabolites;Biosynthesis of cofactors;2-Oxocarboxylic acid metabolism;Cysteine and methionine metabolism;D-Amino acid metabolism;Biosynthesis of various plant secondary metabolites;Biosynthesis of amino acids;Glucosinolate biosynthesis;Protein digestion and absorption;Aminoacyl-tRNA biosynthesis;Antifolate resistance;Central carbon m…	1.0123	1.0079	0.0002475	0.02191	7.5757	7.5791	7.5586	7.5517	7.5711	7.5389	7.5272	7.5313	7.5237	7.5176
pos_1569	Allysine	metab_7493	yes	C04076	pos	1962-83-0;6665-12-9	187.107	1.13033	M+ACN+H	C6H11NO3	0	58.7	HMDB0001263;HMDB0303320;PW_C000976	-	-	map01100;map00310;map01110;map00300;map00960;map01230;map01064;map01060	Metabolism;Metabolism;Metabolism;Metabolism;Metabolism;Metabolism;Metabolism;Metabolism	Global and overview maps;Amino acid metabolism;Global and overview maps;Amino acid metabolism;Biosynthesis of other secondary metabolites;Global and overview maps;Chemical structure transformation maps;Chemical structure transformation maps	Organic acids and derivatives	Carboxylic acids and derivatives	Amino acids, peptides, and analogues	0	58.7	Metabolic pathways;Lysine degradation;Biosynthesis of secondary metabolites;Lysine biosynthesis;Tropane, piperidine and pyridine alkaloid biosynthesis;Biosynthesis of amino acids;Biosynthesis of alkaloids derived from ornithine, lysine and nicotinic acid;Biosynthesis of plant secondary metabolites	Metabolic pathways;Lysine degradation;Biosynthesis of secondary metabolites;Lysine biosynthesis;Tropane, piperidine and pyridine alkaloid biosynthesis;Biosynthesis of amino acids;Biosynthesis of alkaloids derived from ornithine, lysine and nicotinic acid;Biosynthesis of plant secondary metabolites	1.3073	1.3026	3.805e-07	0.0004549	6.8853	6.877	6.8758	6.8662	6.8851	6.8208	6.8129	6.8163	6.8218	6.8118
pos_1481	L-Glutamic Acid	metab_7504	yes	C00025	pos	56-86-0;6893-26-1	148.06	0.778767	M+H	C5H9NO4	88.6	0	PW_C000095;HMDB0060475;HMDB0000148;HMDB0003339;MJDBOTE0000649	Peptides;Hormones and transmitters	Amino acids;Neurotransmitters	map00997;map02010;map01240;map01200;map00998;map00480;map00332;map04742;map00250;map05033;map04974;map04072;map04216;map00630;map00430;map04964;map00470;map00860;map04080;map05016;map05017;map05014;map04727;map01064;map04723;map05031;map04721;map01060;map01100;map00220;map04540;map01120;map01210;map00340;map00524;map01230;map04068;map05034;map01110;map00660;map05230;map04724;map05030;map00650;map…	Metabolism;Environmental Information Processing;Metabolism;Metabolism;Metabolism;Metabolism;Metabolism;Organismal Systems;Metabolism;Human Diseases;Organismal Systems;Environmental Information Processing;Cellular Processes;Metabolism;Metabolism;Organismal Systems;Metabolism;Metabolism;Environmental Information Processing;Human Diseases;Human Diseases;Human Diseases;Organismal Systems;Metabolism;O…	Biosynthesis of other secondary metabolites;Membrane transport;Global and overview maps;Global and overview maps;Biosynthesis of other secondary metabolites;Metabolism of other amino acids;Biosynthesis of other secondary metabolites;Sensory system;Amino acid metabolism;Substance dependence;Digestive system;Signal transduction;Cell growth and death;Carbohydrate metabolism;Metabolism of other amino…	Organic acids and derivatives	Carboxylic acids and derivatives	Amino acids, peptides, and analogues	88.6	0	Biosynthesis of various other secondary metabolites;ABC transporters;Biosynthesis of cofactors;Carbon metabolism;Biosynthesis of various antibiotics;Glutathione metabolism;Carbapenem biosynthesis;Taste transduction;Alanine, aspartate and glutamate metabolism;Nicotine addiction;Protein digestion and absorption;Phospholipase D signaling pathway;Ferroptosis;Glyoxylate and dicarboxylate metabolism;Ta…	Biosynthesis of various other secondary metabolites;ABC transporters;Biosynthesis of cofactors;Carbon metabolism;Biosynthesis of various antibiotics;Glutathione metabolism;Carbapenem biosynthesis;Taste transduction;Alanine, aspartate and glutamate metabolism;Nicotine addiction;Protein digestion and absorption;Phospholipase D signaling pathway;Ferroptosis;Glyoxylate and dicarboxylate metabolism;Ta…	1.2096	1.2058	0.002379	0.07324	6.9045	6.8705	6.8888	6.8731	6.9031	6.8318	6.8509	6.8202	6.8469	6.7838
pos_5933	Phenylacetylglutamine	metab_7513	yes	C04148	pos	28047-15-6	306.144	2.88032	M+ACN+H	C13H16N2O4	0	51.6	HMDB0006344;HMDB0062645;PW_C002728;MJDBOTE0000584	-	-	map00360	Metabolism	Amino acid metabolism	Organic acids and derivatives	Carboxylic acids and derivatives	Amino acids, peptides, and analogues	0	51.6	Phenylalanine metabolism	Phenylalanine metabolism	1.1393	1.1382	0.02682	0.2586	5.2875	5.393	5.3304	5.3118	5.3311	5.4342	5.3631	5.4291	5.3503	5.4084
neg_2779	3-Amino-4-methoxybenzanilide	metab_9805	yes	-	neg	-	725.311	3.07162	3M-H	C14H14N2O2	0	81.7	HMDB0245807	-	-	-	-	-	Benzenoids	Benzene and substituted derivatives	Anilides	0	81.7	-	-	2.8956	2.8921	0.01404	0.1301	3.8772	4.2312	4.4765	4.5848	4.3738	3.7678	4.0758	3.9516	3.5239	3.8167
pos_2454	Phenacetin	metab_1567	yes	C07591	pos	62-44-2	180.102	2.93502	M+H	C10H13NO2	0	58.3	HMDB0256387	-	-	-	-	-	Benzenoids	Benzene and substituted derivatives	Anilides	0	58.3	-	-	2.1969	2.1876	0.001038	0.04766	6.5085	6.4914	6.4063	6.3656	6.4831	6.2621	6.2199	6.2871	6.3357	6.1769
neg_5484	1-(6-((3-Methoxyestra-1,3,5(10)-trien-17-yl)amino)hexyl)-1H-pyrrole-2,5-dione	metab_12742	yes	-	neg	-	485.282	6.83718	M+Na-2H	C29H40N2O3	0	70.3	HMDB0244394	-	-	-	-	-	Lipids and lipid-like molecules	Steroids and steroid derivatives	Azasteroids and derivatives	0	70.3	-	-	1.3917	1.3947	0.004116	0.07247	5.7981	5.7578	5.7329	5.7731	5.7039	5.8878	5.7995	5.8496	5.9109	5.8291
pos_5942	Isofebrifugine	metab_5296	yes	C10698	pos	32434-44-9	644.324	2.86475	2M+ACN+H	C16H19N3O3	0	54.6	HMDB0242253;HMDB0253633	-	-	-	-	-	Organoheterocyclic compounds	Diazanaphthalenes	Benzodiazines	0	54.6	-	-	1.8544	1.8547	0.001483	0.05688	6.334	6.3262	6.291	6.2575	6.2293	6.4255	6.3857	6.4486	6.5047	6.3836
neg_3563	4-Hydroxybenzoic Acid	metab_10667	yes	C00156	neg	99-96-7	137.024	4.03702	M-H	C7H6O3	36.9	0	HMDB0000500;HMDB0304180;PW_C000382;MJDBOTE0001079	-	-	map01100;map01220;map01110;map01120;map01240;map00627;map00130;map00623;map00363;map00362;map00790;map07110;map01061	Metabolism;Metabolism;Metabolism;Metabolism;Metabolism;Metabolism;Metabolism;Metabolism;Metabolism;Metabolism;Metabolism;Drug Development;Metabolism	Global and overview maps;Global and overview maps;Global and overview maps;Global and overview maps;Global and overview maps;Xenobiotics biodegradation and metabolism;Metabolism of cofactors and vitamins;Xenobiotics biodegradation and metabolism;Xenobiotics biodegradation and metabolism;Xenobiotics biodegradation and metabolism;Metabolism of cofactors and vitamins;Skeleton-based classification;Ch…	Benzenoids	Benzene and substituted derivatives	Benzoic acids and derivatives	36.9	0	Metabolic pathways;Degradation of aromatic compounds;Biosynthesis of secondary metabolites;Microbial metabolism in diverse environments;Biosynthesis of cofactors;Aminobenzoate degradation;Ubiquinone and other terpenoid-quinone biosynthesis;Toluene degradation;Bisphenol degradation;Benzoate degradation;Folate biosynthesis;Benzoic acid family;Biosynthesis of phenylpropanoids	Metabolic pathways;Degradation of aromatic compounds;Biosynthesis of secondary metabolites;Microbial metabolism in diverse environments;Biosynthesis of cofactors;Aminobenzoate degradation;Ubiquinone and other terpenoid-quinone biosynthesis;Toluene degradation;Bisphenol degradation;Benzoate degradation;Folate biosynthesis;Benzoic acid family;Biosynthesis of phenylpropanoids	1.2612	1.2498	0.001574	0.04387	4.3153	4.3279	4.3578	4.3887	4.3822	4.4262	4.4563	4.4293	4.407	4.4464
neg_3983	3-Methoxyanthranilate	metab_11119	yes	C05831	neg	-	188.035	4.68713	M+Na-2H	C8H9NO3	0	32.9	HMDB0060374	-	-	map00380	Metabolism	Amino acid metabolism	Benzenoids	Benzene and substituted derivatives	Benzoic acids and derivatives	0	32.9	Tryptophan metabolism	Tryptophan metabolism	1.2861	1.2723	0.001581	0.04387	4.5736	4.5965	4.602	4.5488	4.5247	4.627	4.677	4.6695	4.6417	4.6382
neg_4575	Benzoylnorecgonine	metab_11768	yes	-	neg	-	256.098	5.64433	M-H2O-H	C15H17NO4	0	31.1	HMDB0249054	-	-	-	-	-	Benzenoids	Benzene and substituted derivatives	Benzoic acids and derivatives	0	31.1	-	-	1.4769	1.4639	0.0003955	0.0244	4.7155	4.7248	4.7506	4.7228	4.7929	4.8485	4.8806	4.8354	4.8376	4.8175
neg_4668	Benzoyl ecgonine	metab_11867	yes	-	neg	519-09-5	270.114	5.70833	M-H2O-H	C16H19NO4	0	32.8	HMDB0041836	-	-	-	-	-	Benzenoids	Benzene and substituted derivatives	Benzoic acids and derivatives	0	32.8	-	-	1.2983	1.2915	0.008659	0.1024	4.78	4.7814	4.8727	4.8469	4.8608	4.9045	4.9677	4.9582	4.8825	4.8893
neg_6081	2-Methylhippuric Acid	metab_13380	yes	C01586	neg	42013-20-7	192.066	5.60447	M-H	C10H11NO3	67.3	0	HMDB0011723	-	-	map01100	Metabolism	Global and overview maps	Benzenoids	Benzene and substituted derivatives	Benzoic acids and derivatives	67.3	0	Metabolic pathways	Metabolic pathways	1.9537	1.9343	6.672e-05	0.01185	3.9091	3.9292	3.9003	3.8968	3.9477	4.0875	4.1089	4.1392	4.0952	4.0139
neg_4896	Dioctyl phthalate	metab_17606	yes	C03690	neg	117-81-7	435.275	6.11068	M+FA-H	C24H38O4	0	30.4	HMDB0249243;HMDB0251427	-	-	map05207	Human Diseases	Cancer: overview	Benzenoids	Benzene and substituted derivatives	Benzoic acids and derivatives	0	30.4	Chemical carcinogenesis - receptor activation	Chemical carcinogenesis - receptor activation	1.1855	1.1621	0.03105	0.1978	5.2023	5.1344	5.1411	5.0872	5.1783	5.2348	5.2583	5.2771	5.1334	5.2685
neg_6235	Salicylic Acid	metab_17615	yes	C00805	neg	69-72-7;487-54-7	137.024	5.50802	M-H	C7H6O3	55.4	0	PW_C001263;HMDB0001895;HMDB0302214;HMDB0000840;MJDBZSJ0000117	-	-	map01100;map01220;map00996;map01110;map01120;map00626;map00624;map04976;map00621;map01053;map04075;map01070;map01061	Metabolism;Metabolism;Metabolism;Metabolism;Metabolism;Metabolism;Metabolism;Organismal Systems;Metabolism;Metabolism;Environmental Information Processing;Metabolism;Metabolism	Global and overview maps;Global and overview maps;Biosynthesis of other secondary metabolites;Global and overview maps;Global and overview maps;Xenobiotics biodegradation and metabolism;Xenobiotics biodegradation and metabolism;Digestive system;Xenobiotics biodegradation and metabolism;Metabolism of terpenoids and polyketides;Signal transduction;Chemical structure transformation maps;Chemical str…	Benzenoids	Benzene and substituted derivatives	Benzoic acids and derivatives	55.4	0	Metabolic pathways;Degradation of aromatic compounds;Biosynthesis of various alkaloids;Biosynthesis of secondary metabolites;Microbial metabolism in diverse environments;Naphthalene degradation;Polycyclic aromatic hydrocarbon degradation;Bile secretion;Dioxin degradation;Biosynthesis of siderophore group nonribosomal peptides;Plant hormone signal transduction;Biosynthesis of plant hormones;Biosyn…	Metabolic pathways;Degradation of aromatic compounds;Biosynthesis of various alkaloids;Biosynthesis of secondary metabolites;Microbial metabolism in diverse environments;Naphthalene degradation;Polycyclic aromatic hydrocarbon degradation;Bile secretion;Dioxin degradation;Biosynthesis of siderophore group nonribosomal peptides;Plant hormone signal transduction;Biosynthesis of plant hormones;Biosyn…	1.647	1.6375	0.0001355	0.01342	4.4626	4.4633	4.4695	4.516	4.5147	4.6124	4.6288	4.605	4.643	4.5629
pos_658	2-Aminobenzoic Acid	metab_5984	yes	C00108	pos	118-92-3	120.044	3.5967	M+H-H2O, M+H	C7H7NO2	52	0	PW_C000877;HMDB0001123	-	-	map01100;map01220;map00996;map00997;map01120;map00627;map00998;map00999;map01230;map00621;map01110;map01070;map07110;map00400;map01060;map01063;map00380;map01061;map00405	Metabolism;Metabolism;Metabolism;Metabolism;Metabolism;Metabolism;Metabolism;Metabolism;Metabolism;Metabolism;Metabolism;Metabolism;Drug Development;Metabolism;Metabolism;Metabolism;Metabolism;Metabolism;Metabolism	Global and overview maps;Global and overview maps;Biosynthesis of other secondary metabolites;Biosynthesis of other secondary metabolites;Global and overview maps;Xenobiotics biodegradation and metabolism;Biosynthesis of other secondary metabolites;Biosynthesis of other secondary metabolites;Global and overview maps;Xenobiotics biodegradation and metabolism;Global and overview maps;Chemical struc…	Benzenoids	Benzene and substituted derivatives	Benzoic acids and derivatives	52	0	Metabolic pathways;Degradation of aromatic compounds;Biosynthesis of various alkaloids;Biosynthesis of various other secondary metabolites;Microbial metabolism in diverse environments;Aminobenzoate degradation;Biosynthesis of various antibiotics;Biosynthesis of various plant secondary metabolites;Biosynthesis of amino acids;Dioxin degradation;Biosynthesis of secondary metabolites;Biosynthesis of …	Metabolic pathways;Degradation of aromatic compounds;Biosynthesis of various alkaloids;Biosynthesis of various other secondary metabolites;Microbial metabolism in diverse environments;Aminobenzoate degradation;Biosynthesis of various antibiotics;Biosynthesis of various plant secondary metabolites;Biosynthesis of amino acids;Dioxin degradation;Biosynthesis of secondary metabolites;Biosynthesis of …	1.4564	1.4534	8.671e-05	0.01289	5.1932	5.1804	5.21	5.1965	5.2121	5.2745	5.2592	5.2707	5.3146	5.2747
pos_6127	(S)-3-Hydroxy-N-methylcoclaurine	metab_5499	yes	C05202	pos	-	338.134	2.58367	M+Na	C18H21NO4	0	39.3	HMDB0006921	-	-	map00950;map01100;map01110;map01063	Metabolism;Metabolism;Metabolism;Metabolism	Biosynthesis of other secondary metabolites;Global and overview maps;Global and overview maps;Chemical structure transformation maps	Organoheterocyclic compounds	Isoquinolines and derivatives	Benzylisoquinolines	0	39.3	Isoquinoline alkaloid biosynthesis;Metabolic pathways;Biosynthesis of secondary metabolites;Biosynthesis of alkaloids derived from shikimate pathway	Isoquinoline alkaloid biosynthesis;Metabolic pathways;Biosynthesis of secondary metabolites;Biosynthesis of alkaloids derived from shikimate pathway	1.1392	1.1357	0.002264	0.07124	5.6092	5.6179	5.6077	5.6187	5.6494	5.5861	5.532	5.5598	5.5708	5.5827
pos_7252	Malic acid	metab_7506	yes	C00149	pos	6915-15-7;97-67-6;617-48-1	135.027	0.981783	M+H	C4H6O5	0	32	HMDB0000156;PW_C000592	Organic acids	Carboxylic acids	map01110;map05211;map01200;map00620;map00020;map00630;map04964;map00710;map04922;map01066;map01065;map04742;map01063;map01062;map01061;map01060;map01100;map01120;map05200;map00680;map01064;map00720;map02020;map05230;map01070	Metabolism;Human Diseases;Metabolism;Metabolism;Metabolism;Metabolism;Organismal Systems;Metabolism;Organismal Systems;Metabolism;Metabolism;Organismal Systems;Metabolism;Metabolism;Metabolism;Metabolism;Metabolism;Metabolism;Human Diseases;Metabolism;Metabolism;Metabolism;Environmental Information Processing;Human Diseases;Metabolism	Global and overview maps;Cancer: specific types;Global and overview maps;Carbohydrate metabolism;Carbohydrate metabolism;Carbohydrate metabolism;Excretory system;Energy metabolism;Endocrine system;Chemical structure transformation maps;Chemical structure transformation maps;Sensory system;Chemical structure transformation maps;Chemical structure transformation maps;Chemical structure transformati…	Organic acids and derivatives	Hydroxy acids and derivatives	Beta hydroxy acids and derivatives	0	32	Biosynthesis of secondary metabolites;Renal cell carcinoma;Carbon metabolism;Pyruvate metabolism;Citrate cycle (TCA cycle);Glyoxylate and dicarboxylate metabolism;Proximal tubule bicarbonate reclamation;Carbon fixation in photosynthetic organisms;Glucagon signaling pathway;Biosynthesis of alkaloids derived from terpenoid and polyketide;Biosynthesis of alkaloids derived from histidine and purine;T…	Biosynthesis of secondary metabolites;Renal cell carcinoma;Carbon metabolism;Pyruvate metabolism;Citrate cycle (TCA cycle);Glyoxylate and dicarboxylate metabolism;Proximal tubule bicarbonate reclamation;Carbon fixation in photosynthetic organisms;Glucagon signaling pathway;Biosynthesis of alkaloids derived from terpenoid and polyketide;Biosynthesis of alkaloids derived from histidine and purine;T…	1.1253	1.1198	0.0004701	0.02955	5.5284	5.5303	5.5113	5.5	5.5226	5.479	5.4555	5.4723	5.486	5.4516
neg_19	3-Dehydrocholic Acid	metab_8851	yes	-	neg	2304-89-4	405.264	5.74015	M-H, 2M-H, M+Cl, M+FA-H	C24H38O5	66.1	0	HMDB0000502;HMDB0304121	-	-	-	-	-	Lipids and lipid-like molecules	Steroids and steroid derivatives	Bile acids, alcohols and derivatives	66.1	0	-	-	1.0134	1.0025	0.01508	0.1344	7.4494	7.4153	7.4869	7.4733	7.491	7.4932	7.5378	7.5422	7.4879	7.5482
neg_7886	Sulfolithocholylglycine	metab_17616	yes	C11301	neg	15324-64-8;474-74-8	494.262	3.32863	M-H2O-H	C26H43NO7S	0	52.8	HMDB0002639;HMDB0000698;HMDB0062801	-	-	-	-	-	Lipids and lipid-like molecules	Steroids and steroid derivatives	Bile acids, alcohols and derivatives	0	52.8	-	-	1.6346	1.6159	0.03875	0.2209	4.4326	4.3748	4.2414	4.3574	4.3308	4.25	3.9524	4.2388	4.2997	4.1431
pos_845	7-Ketodeoxycholic Acid	metab_7316	yes	-	pos	911-40-0	407.279	5.77007	M+H, M+K	C24H38O5	78	0	HMDB0000391;MJDBDZS0000043	-	-	-	-	-	Lipids and lipid-like molecules	Steroids and steroid derivatives	Bile acids, alcohols and derivatives	78	0	-	-	1.7422	1.7412	3.159e-05	0.007247	6.4864	6.4726	6.4935	6.4871	6.4943	6.3345	6.4136	6.3841	6.3726	6.3626
pos_2467	TUG-891	metab_1581	yes	-	pos	-	365.157	2.95065	M+H	C23H21FO3	0	37.6	HMDB0259323	-	-	-	-	-	Benzenoids	Benzene and substituted derivatives	Biphenyls and derivatives	0	37.6	-	-	1.3116	1.3108	0.01206	0.1734	5.2207	5.2005	5.2451	5.2658	5.2337	5.377	5.3242	5.3412	5.2515	5.2766
neg_8215	Hydroxylated N-acetyl desmethyl frovatriptan	metab_15707	yes	-	neg	-	334.141	3.02375	M+FA-H	C15H19N3O3	0	57.1	HMDB0061151	-	-	-	-	-	Organoheterocyclic compounds	Indoles and derivatives	Carbazoles	0	57.1	-	-	1.099	1.087	0.0002169	0.01751	6.2892	6.3023	6.3121	6.3219	6.3038	6.2664	6.2559	6.2275	6.2424	6.2586
neg_1611	Lacto-N-biose I	metab_8554	yes	C06372	neg	50787-09-2	418.112	0.616867	M+Cl	C14H25NO11	0	47	HMDB0006575;HMDB0252594	Carbohydrates	Oligosaccharides	-	-	-	Organic oxygen compounds	Organooxygen compounds	Carbohydrates and carbohydrate conjugates	0	47	-	-	1.2547	1.2431	0.02962	0.1927	6.6479	6.6654	6.6339	6.6108	6.6299	6.5864	6.582	6.5255	6.6014	6.4085
neg_3008	Erythromycin A enol ether	metab_10060	yes	-	neg	-	752.394	3.32863	M+K-2H	C37H65NO12	0	71.4	HMDB0251934	-	-	-	-	-	Organic oxygen compounds	Organooxygen compounds	Carbohydrates and carbohydrate conjugates	0	71.4	-	-	1.5141	1.5048	0.0012	0.03831	5.1336	5.1653	5.072	5.0814	5.0727	5.2422	5.1677	5.224	5.2202	5.2306
neg_3490	Etimicin	metab_10587	yes	-	neg	-	498.293	3.93317	M+Na-2H	C21H43N5O7	0	45	HMDB0252101	-	-	-	-	-	Organic oxygen compounds	Organooxygen compounds	Carbohydrates and carbohydrate conjugates	0	45	-	-	1.3394	1.3353	0.01659	0.1405	5.1898	5.3177	5.1616	5.1426	5.1817	5.1218	5.1128	5.0321	5.0916	5.1094
neg_3973	Gentamicin C	metab_11108	yes	C01918	neg	11097-82-8	470.262	4.66198	M+Na-2H	C19H39N5O7	0	59.8	HMDB0252688	Antibiotics	Aminoglycosides	-	-	-	Organic oxygen compounds	Organooxygen compounds	Carbohydrates and carbohydrate conjugates	0	59.8	-	-	1.0277	1.0159	0.006291	0.08714	5.6324	5.6144	5.58	5.5526	5.5827	5.627	5.6613	5.6439	5.6527	5.6569
neg_5512	1-(4-O-beta-D-glucopyranosyl-3-methoxyphenyl)-3,5-dihydroxydecane	metab_12772	yes	-	neg	-	475.267	6.46495	M+Na-2H	C25H42O7	0	40	HMDB0303085	-	-	-	-	-	Organic oxygen compounds	Organooxygen compounds	Carbohydrates and carbohydrate conjugates	0	40	-	-	1.8397	1.8357	0.001583	0.04387	6.206	6.1821	6.1077	6.2264	6.0791	6.3011	6.3203	6.3147	6.2911	6.4117
neg_6841	D-Glucamine	metab_14211	yes	-	neg	-	542.283	4.47717	3M-H	C6H15NO5	0	75.8	HMDB0246693	-	-	-	-	-	Organic oxygen compounds	Organooxygen compounds	Carbohydrates and carbohydrate conjugates	0	75.8	-	-	1.6997	1.6937	0.001262	0.03875	4.808	4.905	4.8651	4.8747	4.9008	4.7458	4.7341	4.7168	4.6475	4.794
neg_8197	Ethyl glucoside	metab_15686	yes	-	neg	3198-49-0	415.183	3.03972	2M-H	C8H16O6	0	49.6	HMDB0242122;HMDB0029968	-	-	-	-	-	Organic oxygen compounds	Organooxygen compounds	Carbohydrates and carbohydrate conjugates	0	49.6	-	-	1.5136	1.5012	2.51e-05	0.006959	5.6705	5.7169	5.6938	5.6793	5.6946	5.5898	5.5558	5.592	5.6079	5.5982
neg_3517	Glucosamine	metab_17609	yes	C00329	neg	3416-24-8;14257-69-3	536.236	3.97313	3M-H	C6H13NO5	0	32.6	HMDB0001514;HMDB0245095;HMDB0242589;HMDB0030091;PW_C001167	Carbohydrates	Monosaccharides	map01100;map00520;map02060;map01250	Metabolism;Metabolism;Environmental Information Processing;Metabolism	Global and overview maps;Carbohydrate metabolism;Membrane transport;Global and overview maps	Organic oxygen compounds	Organooxygen compounds	Carbohydrates and carbohydrate conjugates	0	32.6	Metabolic pathways;Amino sugar and nucleotide sugar metabolism;Phosphotransferase system (PTS);Biosynthesis of nucleotide sugars	Metabolic pathways;Amino sugar and nucleotide sugar metabolism;Phosphotransferase system (PTS);Biosynthesis of nucleotide sugars	1.3554	1.3399	0.0005864	0.02748	4.9019	4.8728	4.9159	4.9164	4.9093	4.8199	4.7625	4.8295	4.833	4.836
pos_1544	D-manno-2-Heptulose	metab_592	yes	C08236	pos	60426-75-7	252.109	1.05997	M+ACN+H	C7H14O7	0	52.9	HMDB0029935	-	-	-	-	-	Organic oxygen compounds	Organooxygen compounds	Carbohydrates and carbohydrate conjugates	0	52.9	-	-	1.8072	1.8018	0.001878	0.06543	5.364	5.3326	5.3429	5.3114	5.3241	5.1923	5.1994	5.2294	5.1019	5.2749
pos_2419	Nomilinic acid	metab_1529	yes	-	pos	35930-20-2	565.261	2.86475	M+CH3OH+H	C28H36O10	0	55.5	HMDB0035771	-	-	-	-	-	Organic oxygen compounds	Organooxygen compounds	Carbohydrates and carbohydrate conjugates	0	55.5	-	-	2.3112	2.3016	0.01715	0.2059	4.6453	5.027	4.9932	4.8056	4.8044	4.7402	4.4284	4.5761	4.6172	4.6238
pos_387	N-Acetyllactosamine	metab_3086	yes	C00611	pos	32181-59-2	422.105	0.607633	M+Na, M+K	C14H25NO11	0	55.5	HMDB0001542	-	-	-	-	-	Organic oxygen compounds	Organooxygen compounds	Carbohydrates and carbohydrate conjugates	0	55.5	-	-	1.7888	1.78	0.01697	0.2058	6.999	6.9868	6.9436	6.9068	6.9636	6.8661	6.8651	6.7757	6.8939	6.6285
pos_6330	Ethyl beta-D-glucopyranoside	metab_5722	yes	-	pos	3198-49-0	458.223	2.31858	2M+ACN+H	C8H16O6	0	37	HMDB0029968	-	-	-	-	-	Organic oxygen compounds	Organooxygen compounds	Carbohydrates and carbohydrate conjugates	0	37	-	-	1.3449	1.3396	0.001025	0.04766	6.0082	6.0251	6.0246	6.0081	6.0538	5.9923	5.9356	5.9533	5.9213	5.9524
pos_6909	Galbeta1-3GIcNAcbeta	metab_6333	yes	-	pos	-	416.177	1.75842	M+CH3OH+H	C14H25NO11	0	50.3	HMDB0252594	-	-	-	-	-	Organic oxygen compounds	Organooxygen compounds	Carbohydrates and carbohydrate conjugates	0	50.3	-	-	1.5438	1.5425	0.007663	0.1347	5.6683	5.6485	5.5575	5.7163	5.632	5.5373	5.4859	5.5343	5.5385	5.5873
pos_7015	1-(beta-D-Ribofuranosyl)-1,4-dihydronicotinamide	metab_6449	yes	C15497	pos	-	274.139	1.71157	M+NH4	C11H16N2O5	0	36	HMDB0011648;HMDB0011643	-	-	-	-	-	Organic oxygen compounds	Organooxygen compounds	Carbohydrates and carbohydrate conjugates	0	36	-	-	1.7727	1.7653	2.988e-05	0.007247	5.8029	5.7717	5.7462	5.7466	5.7773	5.6817	5.6567	5.6553	5.6309	5.6376
neg_1915	(1R,2S,3R)-2-Acetyl-4(5)-(1,2,3,4-tetrahydroxybutyl)imidazole	metab_8868	yes	-	neg	94944-70-4	275.088	1.47718	M+FA-H	C9H14N2O5	0	31.1	HMDB0029756	-	-	-	-	-	Organic oxygen compounds	Organooxygen compounds	Carbonyl compounds	0	31.1	-	-	1.2072	1.1959	0.01411	0.1305	5.1107	4.9861	5.0033	5.0759	5.1075	4.9838	4.9838	4.9611	4.964	4.975
neg_8871	Carboquone	metab_16425	yes	-	neg	-	366.131	2.25203	M+FA-H	C15H19N3O5	0	45	HMDB0249646	-	-	-	-	-	Organic oxygen compounds	Organooxygen compounds	Carbonyl compounds	0	45	-	-	1.0994	1.0926	0.001548	0.04383	5.1235	5.1539	5.1516	5.1245	5.1657	5.077	5.0624	5.1002	5.1122	5.0682
pos_6820	Pseudooxynicotine	metab_6235	yes	C20361	pos	2055-23-4	196.144	1.82838	M+NH4	C10H14N2O	0	34.1	HMDB0001240	-	-	map01100;map01120;map00760	Metabolism;Metabolism;Metabolism	Global and overview maps;Global and overview maps;Metabolism of cofactors and vitamins	Organic oxygen compounds	Organooxygen compounds	Carbonyl compounds	0	34.1	Metabolic pathways;Microbial metabolism in diverse environments;Nicotinate and nicotinamide metabolism	Metabolic pathways;Microbial metabolism in diverse environments;Nicotinate and nicotinamide metabolism	2.1854	2.1748	0.001648	0.06157	5.8505	5.8482	5.8067	5.7373	5.6768	5.6504	5.5977	5.5051	5.5625	5.624
pos_7712	Furfural	metab_7182	yes	C14279	pos	1998-01-01	97.0287	0.397233	M+H	C5H4O2	47	0	HMDB0032914	-	-	map01100;map01120;map00365	Metabolism;Metabolism;Metabolism	Global and overview maps;Global and overview maps;Xenobiotics biodegradation and metabolism	Organic oxygen compounds	Organooxygen compounds	Carbonyl compounds	47	0	Metabolic pathways;Microbial metabolism in diverse environments;Furfural degradation	Metabolic pathways;Microbial metabolism in diverse environments;Furfural degradation	1.1984	1.1931	0.0009074	0.0452	4.7152	4.6968	4.7046	4.7142	4.6591	4.6339	4.6259	4.6484	4.6494	4.6443
pos_2088	4-Aminobutyraldehyde	metab_7490	yes	C00555	pos	4390-05-0	129.102	2.25615	M+ACN+H	C4H9NO	0	34.2	HMDB0001080	-	-	map01100;map00330;map00410	Metabolism;Metabolism;Metabolism	Global and overview maps;Amino acid metabolism;Metabolism of other amino acids	Organic oxygen compounds	Organooxygen compounds	Carbonyl compounds	0	34.2	Metabolic pathways;Arginine and proline metabolism;beta-Alanine metabolism	Metabolic pathways;Arginine and proline metabolism;beta-Alanine metabolism	1.0462	1.0408	0.01104	0.1646	5.0202	5.0213	4.9955	4.965	4.9805	4.9435	4.9453	4.9164	4.9835	4.9408
pos_1200	2-Furamide	metab_220	yes	C07637	pos	3736-81-0	129.066	1.74277	M+H, M+NH4	C5H5NO2	0	38.2	HMDB0245133;HMDB0015684	-	-	-	-	-	Organic acids and derivatives	Carboxylic acids and derivatives	Carboxylic acid derivatives	0	38.2	-	-	2.0635	2.0577	0.0001532	0.01636	6.4726	6.4455	6.4917	6.4913	6.4847	6.3354	6.2997	6.3271	6.2364	6.373
pos_2933	N-Phenethylacetamide	metab_2062	yes	C06746	pos	-	164.107	4.637	M+H	C10H13NO	80.8	0	HMDB0255222	-	-	-	-	-	Organic acids and derivatives	Carboxylic acids and derivatives	Carboxylic acid derivatives	80.8	0	-	-	2.9073	2.8951	0.0009157	0.0453	5.1208	5.0545	5.1604	5.0875	5.1353	4.8505	4.7332	4.8848	4.8554	4.5404
pos_7292	Nomega-Acetylhistamine	metab_6738	yes	C05135	pos	673-49-4	154.097	0.91145	M+H	C7H11N3O	85.1	0	HMDB0013253	-	-	map00340	Metabolism	Amino acid metabolism	Organic acids and derivatives	Carboxylic acids and derivatives	Carboxylic acid derivatives	85.1	0	Histidine metabolism	Histidine metabolism	2.0598	2.052	0.0001182	0.0157	5.4208	5.3631	5.4356	5.4068	5.3917	5.2758	5.2897	5.252	5.1883	5.207
pos_7454	N-Acetylhistamine	metab_6901	yes	C05135	pos	673-49-4	154.097	0.623083	M+H	C7H11N3O	74.6	0	HMDB0013253	-	-	map00340	Metabolism	Amino acid metabolism	Organic acids and derivatives	Carboxylic acids and derivatives	Carboxylic acid derivatives	74.6	0	Histidine metabolism	Histidine metabolism	1.5673	1.5577	0.00547	0.1167	5.233	5.1735	5.1936	5.2019	5.1656	5.1581	5.1254	5.0495	5.0844	5.0127
pos_7488	Propionic acid	metab_6935	yes	C00163	pos	1979-09-04	116.071	0.607633	M+ACN+H	C3H6O2	0	47.2	HMDB0000237;LMFA01010003;PW_C000159	Organic acids	Carboxylic acids	map01100;map01220;map00640;map00642;map01120;map00760;map04973;map04974	Metabolism;Metabolism;Metabolism;Metabolism;Metabolism;Metabolism;Organismal Systems;Organismal Systems	Global and overview maps;Global and overview maps;Carbohydrate metabolism;Xenobiotics biodegradation and metabolism;Global and overview maps;Metabolism of cofactors and vitamins;Digestive system;Digestive system	Organic acids and derivatives	Carboxylic acids and derivatives	Carboxylic acids	0	47.2	Metabolic pathways;Degradation of aromatic compounds;Propanoate metabolism;Ethylbenzene degradation;Microbial metabolism in diverse environments;Nicotinate and nicotinamide metabolism;Carbohydrate digestion and absorption;Protein digestion and absorption	Metabolic pathways;Degradation of aromatic compounds;Propanoate metabolism;Ethylbenzene degradation;Microbial metabolism in diverse environments;Nicotinate and nicotinamide metabolism;Carbohydrate digestion and absorption;Protein digestion and absorption	1.3189	1.3161	6.188e-06	0.003458	7.5929	7.6029	7.5803	7.5809	7.6017	7.5255	7.5326	7.5242	7.5398	7.5186
pos_6084	CDP-DG(18:2(9Z,11Z)/i-19:0)	metab_5452	yes	C00269	pos	-	532.772	2.64618	M+2Na	C49H87N3O15P2	0	60.9	PW_C076395;HMDB0116059	-	-	map01100;map00564;map01110;map04070	Metabolism;Metabolism;Metabolism;Environmental Information Processing	Global and overview maps;Lipid metabolism;Global and overview maps;Signal transduction	Lipids and lipid-like molecules	Glycerophospholipids	CDP-glycerols	0	60.9	Metabolic pathways;Glycerophospholipid metabolism;Biosynthesis of secondary metabolites;Phosphatidylinositol signaling system	Metabolic pathways;Glycerophospholipid metabolism;Biosynthesis of secondary metabolites;Phosphatidylinositol signaling system	1.2902	1.2953	0.02033	0.2271	6.3891	6.2819	6.2909	6.2341	6.2793	6.3805	6.3395	6.4086	6.4058	6.357
pos_1927	Polyporusterone C	metab_997	yes	-	pos	141360-90-9	521.281	1.97592	M+2Na-H	C28H44O6	0	54.3	HMDB0038497	-	-	-	-	-	Lipids and lipid-like molecules	Steroids and steroid derivatives	Cholestane steroids	0	54.3	-	-	9.0101	8.9967	0.001138	0.04958	1.7882	1.7838	5.135	1.7837	3.4382	6.1188	6.0142	6.1127	6.0797	6.1241
neg_4105	N-[2-Ethoxy-2-(4-methoxyphenyl)ethyl]cinnamide	metab_11254	yes	-	neg	70546-94-0	709.353	4.94365	2M+Hac-H	C20H23NO3	0	35.3	HMDB0039633	-	-	-	-	-	Phenylpropanoids and polyketides	Cinnamic acids and derivatives	Cinnamic acid amides	0	35.3	-	-	1.5337	1.5225	0.01391	0.1293	5.2168	5.4366	5.365	5.3616	5.4037	5.5466	5.5037	5.447	5.5196	5.4399
neg_2063	3',5'-Cyclic GMP	metab_9026	yes	C00942	neg	7665-99-8	344.04	1.88347	M-H	C10H12N5O7P	42.1	0	HMDB0001314	Nucleic acids	Cyclic nucleotides	map01100;map00230;map04976;map04970;map04540;map04714;map04270;map04921;map04713;map04923;map04925;map04924;map04022;map04740;map04730;map04744;map04611	Metabolism;Metabolism;Organismal Systems;Organismal Systems;Cellular Processes;Organismal Systems;Organismal Systems;Organismal Systems;Organismal Systems;Organismal Systems;Organismal Systems;Organismal Systems;Environmental Information Processing;Organismal Systems;Organismal Systems;Organismal Systems;Organismal Systems	Global and overview maps;Nucleotide metabolism;Digestive system;Digestive system;Cellular community - eukaryotes;Environmental adaptation;Circulatory system;Endocrine system;Environmental adaptation;Endocrine system;Endocrine system;Endocrine system;Signal transduction;Sensory system;Nervous system;Sensory system;Immune system	Nucleosides, nucleotides, and analogues	Purine nucleotides	Cyclic purine nucleotides	42.1	0	Metabolic pathways;Purine metabolism;Bile secretion;Salivary secretion;Gap junction;Thermogenesis;Vascular smooth muscle contraction;Oxytocin signaling pathway;Circadian entrainment;Regulation of lipolysis in adipocytes;Aldosterone synthesis and secretion;Renin secretion;cGMP-PKG signaling pathway;Olfactory transduction;Long-term depression;Phototransduction;Platelet activation	Metabolic pathways;Purine metabolism;Bile secretion;Salivary secretion;Gap junction;Thermogenesis;Vascular smooth muscle contraction;Oxytocin signaling pathway;Circadian entrainment;Regulation of lipolysis in adipocytes;Aldosterone synthesis and secretion;Renin secretion;cGMP-PKG signaling pathway;Olfactory transduction;Long-term depression;Phototransduction;Platelet activation	3.1221	3.1079	0.0002466	0.01868	4.015	3.8518	3.9205	4.1052	3.7404	4.4531	4.335	4.3872	4.2712	4.4649
neg_4193	26-Deoxyactein	metab_11350	yes	-	neg	-	705.383	5.15115	M+FA-H	C37H56O10	0	39	HMDB0245709	-	-	-	-	-	Lipids and lipid-like molecules	Steroids and steroid derivatives	Cycloartanols and derivatives	0	39	-	-	2.2459	2.2104	0.02101	0.1598	4.4044	4.4856	4.5887	4.5979	4.4706	4.399	4.2157	3.8535	4.2396	4.36
neg_6510	Alpha-Carboxy-delta-nonalactone	metab_13847	yes	-	neg	-	245.103	5.08518	M+FA-H	C10H16O4	0	31.5	HMDB0030990	-	-	-	-	-	Organoheterocyclic compounds	Lactones	Delta valerolactones	0	31.5	-	-	1.8345	1.8263	0.01436	0.131	4.09	4.0804	4.1074	3.9761	4.0417	4.4224	4.0651	4.2267	4.2535	4.298
pos_6115	Hydroxydestruxin B	metab_5487	yes	-	pos	-	654.345	2.59925	M+2Na-H	C30H51N5O8	0	81.2	HMDB0040135	-	-	-	-	-	Organic acids and derivatives	Peptidomimetics	Depsipeptides	0	81.2	-	-	4.6113	4.5991	3.067e-05	0.007247	5.3186	4.9964	5.0414	5.1364	5.3024	4.2519	4.2472	4.3621	4.6173	4.3644
neg_4039	Sobetirome	metab_11181	yes	C15618	neg	211110-63-3	365.113	4.79413	M+K-2H	C20H24O4	0	41.6	HMDB0258355	-	-	-	-	-	Benzenoids	Benzene and substituted derivatives	Diphenylmethanes	0	41.6	-	-	1.8004	1.7883	0.003076	0.06347	5.1312	5.0111	5.0473	5.0392	5.1284	4.8313	4.827	4.9729	4.9481	4.9456
pos_1218	Cetirizine	metab_239	yes	C07778	pos	83881-51-0	430.193	1.74277	M+H, M+ACN+H	C21H25ClN2O3	0	32.5	PW_C002375;HMDB0005032	-	-	-	-	-	Benzenoids	Benzene and substituted derivatives	Diphenylmethanes	0	32.5	-	-	1.1138	1.1111	0.001318	0.05224	6.2839	6.2876	6.2621	6.293	6.3004	6.2612	6.2208	6.2307	6.2158	6.2452
neg_4092	1,2-dibutyrin	metab_11239	yes	-	neg	-	463.256	4.90652	2M-H	C11H20O5	0	48.5	HMDB0304007	-	-	-	-	-	Lipids and lipid-like molecules	Glycerolipids	Diradylglycerols	0	48.5	-	-	2.0849	2.0683	2.564e-05	0.006959	5.2842	5.3193	5.2067	5.2575	5.2643	5.075	5.0487	5.0387	5.1099	5.0894
neg_4786	DG(18:1(9Z)/20:2(11Z,14Z)/0:0)	metab_11988	yes	C00165	neg	-	691.551	5.90105	M+FA-H	C41H74O5	0	41.8	PW_C003276;HMDB0007225	-	-	map05214;map05167;map04650;map05163;map04750;map05235;map04015;map04014;map04659;map04540;map04010;map04012;map05022;map04370;map04371;map04072;map04071;map04975;map05143;map05012;map05231;map05146;map04919;map05200;map04961;map04745;map04921;map04920;map04923;map04925;map05017;map04625;map04929;map04726;map04725;map04724;map04723;map04722;map05223;map04720;map04666;map05170;map04664;map04658;map…	Human Diseases;Human Diseases;Organismal Systems;Human Diseases;Organismal Systems;Human Diseases;Environmental Information Processing;Environmental Information Processing;Organismal Systems;Cellular Processes;Environmental Information Processing;Environmental Information Processing;Human Diseases;Environmental Information Processing;Environmental Information Processing;Environmental Information …	Cancer: specific types;Infectious disease: viral;Immune system;Infectious disease: viral;Sensory system;Cancer: overview;Signal transduction;Signal transduction;Immune system;Cellular community - eukaryotes;Signal transduction;Signal transduction;Neurodegenerative disease;Signal transduction;Signal transduction;Signal transduction;Signal transduction;Digestive system;Infectious disease: parasitic…	Lipids and lipid-like molecules	Glycerolipids	Diradylglycerols	0	41.8	Glioma;Kaposi sarcoma-associated herpesvirus infection;Natural killer cell mediated cytotoxicity;Human cytomegalovirus infection;Inflammatory mediator regulation of TRP channels;PD-L1 expression and PD-1 checkpoint pathway in cancer;Rap1 signaling pathway;Ras signaling pathway;Th17 cell differentiation;Gap junction;MAPK signaling pathway;ErbB signaling pathway;Pathways of neurodegeneration - mult…	Glioma;Kaposi sarcoma-associated herpesvirus infection;Natural killer cell mediated cytotoxicity;Human cytomegalovirus infection;Inflammatory mediator regulation of TRP channels;PD-L1 expression and PD-1 checkpoint pathway in cancer;Rap1 signaling pathway;Ras signaling pathway;Th17 cell differentiation;Gap junction;MAPK signaling pathway;ErbB signaling pathway;Pathways of neurodegeneration - mult…	1.3042	1.2961	0.00932	0.106	5.067	5.0779	5.0229	5.0133	5.0166	5.0086	4.9629	4.9589	4.9361	4.8623
pos_50	Plastoquinone 3	metab_4324	yes	-	pos	1168-52-1	323.236	5.67623	M+H-H2O, M+ACN+H, M+H, M+H-2H2O	C23H32O2	0	32.4	HMDB0033786	-	-	-	-	-	Lipids and lipid-like molecules	Prenol lipids	Diterpenoids	0	32.4	-	-	1.8973	1.8887	0.03975	0.3066	4.4675	4.3749	4.3687	4.3857	4.7761	4.6441	4.6802	4.677	4.7034	4.6317
pos_5936	Crocin 4	metab_5289	yes	C00744	pos	55750-86-2	537.266	2.87258	M+CH3OH+H	C27H36O9	0	51.2	HMDB0039122	-	-	map01100;map00522;map01110	Metabolism;Metabolism;Metabolism	Global and overview maps;Metabolism of terpenoids and polyketides;Global and overview maps	Lipids and lipid-like molecules	Prenol lipids	Diterpenoids	0	51.2	Metabolic pathways;Biosynthesis of 12-, 14- and 16-membered macrolides;Biosynthesis of secondary metabolites	Metabolic pathways;Biosynthesis of 12-, 14- and 16-membered macrolides;Biosynthesis of secondary metabolites	2.4728	2.4783	0.01045	0.1608	4.9433	5.3851	5.2591	5.3354	5.2401	4.8526	4.9113	5.0846	4.9394	4.9472
pos_6414	Gibberellin A12	metab_5813	yes	C11857	pos	1164-45-0	355.186	2.21723	M+Na	C20H28O4	0	50.4	LMPR0104170014;HMDB0301912;HMDB0303453	-	-	map01100;map00904;map01110	Metabolism;Metabolism;Metabolism	Global and overview maps;Metabolism of terpenoids and polyketides;Global and overview maps	Lipids and lipid-like molecules	Prenol lipids	Diterpenoids	0	50.4	Metabolic pathways;Diterpenoid biosynthesis;Biosynthesis of secondary metabolites	Metabolic pathways;Diterpenoid biosynthesis;Biosynthesis of secondary metabolites	2.4036	2.396	0.03365	0.284	4.5854	4.1123	4.5163	4.7328	4.6945	4.8244	4.8401	4.6831	4.9318	4.8769
neg_3579	Leukotriene F4	metab_10684	yes	C06462	neg	-	567.278	4.06103	M-H	C28H44N2O8S	0	48.6	LMFA03020076;LMFA03020009;HMDB0006465	Lipids	Eicosanoids	map00590;map01100	Metabolism;Metabolism	Lipid metabolism;Global and overview maps	Lipids and lipid-like molecules	Fatty Acyls	Eicosanoids	0	48.6	Arachidonic acid metabolism;Metabolic pathways	Arachidonic acid metabolism;Metabolic pathways	1.3341	1.3293	0.000107	0.01315	5.4203	5.3888	5.394	5.4101	5.3588	5.4935	5.4658	5.4686	5.4738	5.4793
neg_6305	N-acetyl Leukotriene E4	metab_13623	yes	-	neg	-	526.252	5.42625	M+FA-H	C25H39NO6S	0	48.3	HMDB0255045	-	-	-	-	-	Lipids and lipid-like molecules	Fatty Acyls	Eicosanoids	0	48.3	-	-	1.534	1.5327	0.008925	0.1042	4.3963	4.4628	4.3847	4.4636	4.509	4.3424	4.4018	4.3261	4.2631	4.2312
pos_2090	Leukotriene-f4	metab_1171	yes	-	pos	-	569.292	2.25615	M+H	C28H44N2O8S	0	34.6	HMDB0062488	-	-	-	-	-	Lipids and lipid-like molecules	Fatty Acyls	Eicosanoids	0	34.6	-	-	1.0262	1.0223	0.001075	0.04881	6.3364	6.3379	6.3749	6.3284	6.342	6.299	6.3029	6.2916	6.3051	6.308
pos_4503	Resolvin E2	metab_3784	yes	C18173	pos	-	352.248	5.85592	M+NH4	C20H30O4	0	67.1	LMFA03140011;HMDB0257163	-	-	-	-	-	Lipids and lipid-like molecules	Fatty Acyls	Eicosanoids	0	67.1	-	-	1.6544	1.6447	0.02438	0.2468	4.7884	4.9181	4.8769	4.9359	4.7057	4.8902	4.9865	4.9882	5.0221	5.0232
neg_6030	Danatrol	metab_13327	yes	C06938	neg	17230-88-5	358.18	5.63635	M+Na-2H	C22H27NO2	0	48.4	HMDB0250842;HMDB0002835	-	-	-	-	-	Lipids and lipid-like molecules	Steroids and steroid derivatives	Estrane steroids	0	48.4	-	-	1.3976	1.3845	0.006607	0.08966	5.6591	5.6037	5.6341	5.576	5.6133	5.4765	5.4464	5.5623	5.5781	5.4999
neg_7403	Norerythromycin	metab_14820	yes	-	neg	-	740.395	3.83302	M+Cl	C35H63NO13	0	58	HMDB0061026	-	-	-	-	-	Lipids and lipid-like molecules	Steroids and steroid derivatives	Estrane steroids	0	58	-	-	1.3356	1.3232	0.002294	0.05361	6.885	6.8429	6.8532	6.8046	6.8159	6.8877	6.9733	6.9241	6.9496	6.9158
pos_1224	(16R,17R)-3-Cyclopentyloxy-17-ethynyl-13-methyl-7,8,9,11,12,14,15,16-octahydro-6H-cyclopenta[a]phenanthrene-16,17-diol	metab_246	yes	-	pos	-	345.223	1.75842	M+H-2H2O, M+2Na-H	C25H32O3	0	30.3	HMDB0242295	-	-	-	-	-	Lipids and lipid-like molecules	Steroids and steroid derivatives	Estrane steroids	0	30.3	-	-	1.3803	1.3788	0.01139	0.1677	5.587	5.5797	5.5593	5.5353	5.5623	5.436	5.5112	5.5589	5.4232	5.4495
neg_2545	(5E)-3-Hydroxyhept-5-enoylcarnitine	metab_9549	yes	-	neg	-	322.141	2.77452	M+Cl	C14H25NO5	0	41.1	HMDB0241686	-	-	-	-	-	Lipids and lipid-like molecules	Fatty Acyls	Fatty acid esters	0	41.1	-	-	1.5037	1.4924	0.0001803	0.01545	5.3589	5.375	5.3879	5.3711	5.3902	5.2492	5.2332	5.2768	5.2804	5.3203
neg_2885	3-Hydroxyhept-4-enoylcarnitine	metab_9923	yes	-	neg	-	322.141	3.20012	M+Cl	C14H25NO5	0	34.1	HMDB0241685	-	-	-	-	-	Lipids and lipid-like molecules	Fatty Acyls	Fatty acid esters	0	34.1	-	-	1.0891	1.0835	0.005778	0.08504	4.8425	4.8741	4.843	4.8189	4.8349	4.7581	4.781	4.7399	4.7947	4.823
neg_3518	3,4,5-Trihydroxypentanoylcarnitine	metab_10617	yes	-	neg	-	585.289	3.97313	2M-H	C12H23NO7	0	77.5	HMDB0241652	-	-	-	-	-	Lipids and lipid-like molecules	Fatty Acyls	Fatty acid esters	0	77.5	-	-	1.7887	1.7784	0.003843	0.06967	4.8228	4.9921	4.9413	4.8937	4.9612	4.8434	4.7147	4.7167	4.6971	4.8063
neg_5037	2-Tiglylcarnitine	metab_12253	yes	-	neg	-	485.282	7.0863	2M-H	C12H21NO4	0	58.7	HMDB0241658	-	-	-	-	-	Lipids and lipid-like molecules	Fatty Acyls	Fatty acid esters	0	58.7	-	-	1.467	1.468	0.005897	0.08587	5.3174	5.3298	5.3024	5.2835	5.2712	5.4262	5.3471	5.3946	5.523	5.394
neg_5857	Dodeca-2,4,6-trienoylcarnitine	metab_13142	yes	-	neg	-	382.223	5.7322	M+FA-H	C19H31NO4	0	46.7	HMDB0241276	-	-	-	-	-	Lipids and lipid-like molecules	Fatty Acyls	Fatty acid esters	0	46.7	-	-	1.1683	1.1543	0.01505	0.1344	5.2532	5.2084	5.2157	5.2192	5.3075	5.2567	5.3194	5.3489	5.3543	5.3146
neg_7693	8-Oxononanoylcarnitine	metab_15135	yes	-	neg	-	352.151	3.5378	M+K-2H	C16H29NO5	0	44.6	HMDB0241786	-	-	-	-	-	Lipids and lipid-like molecules	Fatty Acyls	Fatty acid esters	0	44.6	-	-	1.2379	1.2232	0.01738	0.1447	4.5541	4.5374	4.5099	4.5422	4.549	4.452	4.4176	4.3651	4.5321	4.4849
pos_6090	Neuraminic acid	metab_5459	yes	C06469	pos	114-04-5	232.083	2.63835	M+H-2H2O	C9H17NO8	0	60.1	HMDB0000830	Carbohydrates	Monosaccharides	-	-	-	Lipids and lipid-like molecules	Fatty Acyls	Fatty acid esters	0	60.1	-	-	1.0609	1.0585	0.02589	0.2555	5.3871	5.3267	5.3863	5.3483	5.4371	5.3248	5.3319	5.299	5.3443	5.3004
neg_5672	Eicosanedioic acid	metab_12946	yes	-	neg	-	341.269	6.01507	M-H	C20H38O4	0	50.5	HMDB0242141;LMFA01170035	-	-	-	-	-	Lipids and lipid-like molecules	Fatty Acyls	Fatty acids and conjugates	0	50.5	-	-	1.5692	1.5571	0.001861	0.04823	4.7978	4.7897	4.8179	4.8852	4.8288	4.9871	4.9611	4.9922	4.8915	4.9025
neg_574	2-Hydroxypentanoic Acid	metab_13020	yes	-	neg	617-31-2	117.055	2.97525	M-H, M+FA-H	C5H10O3	56	0	HMDB0001863	-	-	-	-	-	Lipids and lipid-like molecules	Fatty Acyls	Fatty acids and conjugates	56	0	-	-	1.1172	1.1118	4.527e-05	0.01029	6.3188	6.3151	6.3288	6.3287	6.3288	6.4011	6.3776	6.3747	6.3871	6.3625
neg_6330	Auda	metab_13650	yes	-	neg	-	413.277	5.38715	M+Na-2H	C23H40N2O3	0	30.6	HMDB0248721	-	-	-	-	-	Lipids and lipid-like molecules	Fatty Acyls	Fatty acids and conjugates	0	30.6	-	-	1.6823	1.6713	0.0005751	0.02748	5.6514	5.6369	5.6378	5.564	5.5718	5.79	5.7647	5.723	5.7633	5.6982
pos_3502	Dihomo-alpha-linolenic acid	metab_2683	yes	C16522	pos	17046-59-2	307.263	5.94375	M+H	C20H34O2	0	31	HMDB0060039	-	-	map01040	Metabolism	Lipid metabolism	Lipids and lipid-like molecules	Fatty Acyls	Fatty acids and conjugates	0	31	Biosynthesis of unsaturated fatty acids	Biosynthesis of unsaturated fatty acids	1.0874	1.0773	0.01439	0.1904	4.6066	4.6632	4.5919	4.6603	4.6489	4.6711	4.7215	4.7066	4.6735	4.676
pos_3947	(+)-15,16-Dihydroxyoctadecanoic acid	metab_3172	yes	-	pos	-	299.258	7.5865	M+H-H2O	C18H36O4	0	44.9	HMDB0031008	-	-	-	-	-	Lipids and lipid-like molecules	Fatty Acyls	Fatty acids and conjugates	0	44.9	-	-	1.2046	1.1949	0.02074	0.229	5.9384	5.8822	5.8706	5.8656	5.7939	5.8278	5.7945	5.7756	5.8078	5.7903
pos_4007	Caproic acid	metab_3237	yes	C01585	pos	142-62-1	158.117	7.28975	M+ACN+H	C6H12O2	0	31.5	LMFA01010006;HMDB0000535;PW_C000412	Organic acids;Lipids	Carboxylic acids;Fatty acids	-	-	-	Lipids and lipid-like molecules	Fatty Acyls	Fatty acids and conjugates	0	31.5	-	-	1.1025	1.0998	0.0001677	0.01694	6.0783	6.0698	6.0883	6.1001	6.0916	6.1406	6.1232	6.1223	6.1456	6.1294
pos_4705	7,8-diaminopelargonate	metab_4002	yes	C01037	pos	-	377.316	5.70757	2M+H	C9H20N2O2	0	72.9	HMDB0304236	-	-	map01100;map00780;map01240	Metabolism;Metabolism;Metabolism	Global and overview maps;Metabolism of cofactors and vitamins;Global and overview maps	Lipids and lipid-like molecules	Fatty Acyls	Fatty acids and conjugates	0	72.9	Metabolic pathways;Biotin metabolism;Biosynthesis of cofactors	Metabolic pathways;Biotin metabolism;Biosynthesis of cofactors	1.4721	1.4712	0.0001493	0.01636	5.5087	5.4941	5.464	5.4672	5.4756	5.5823	5.5591	5.5901	5.5491	5.5449
pos_5786	Undecanedioic acid	metab_5131	yes	-	pos	1852-04-6	234.17	3.12997	M+NH4	C11H20O4	0	65.8	LMFA01170007;HMDB0000888	-	-	-	-	-	Lipids and lipid-like molecules	Fatty Acyls	Fatty acids and conjugates	0	65.8	-	-	1.1626	1.1589	0.0009071	0.0452	5.454	5.4787	5.4541	5.4459	5.438	5.4174	5.3892	5.3882	5.3829	5.4216
pos_6674	Aminocaproic Acid	metab_6078	yes	C02378	pos	60-32-2	173.128	1.922	M+ACN+H	C6H13NO2	38.6	0	PW_C001268;HMDB0001901	-	-	map01100;map00930;map01120	Metabolism;Metabolism;Metabolism	Global and overview maps;Xenobiotics biodegradation and metabolism;Global and overview maps	Lipids and lipid-like molecules	Fatty Acyls	Fatty acids and conjugates	38.6	0	Metabolic pathways;Caprolactam degradation;Microbial metabolism in diverse environments	Metabolic pathways;Caprolactam degradation;Microbial metabolism in diverse environments	1.5086	1.4988	0.01469	0.1931	5.4102	5.2908	5.2539	5.2036	5.2938	5.1829	5.1989	5.197	5.1657	5.169
pos_7497	4-Trimethylammoniobutanoic Acid	metab_6945	yes	C01181	pos	407-64-7	146.117	0.599817	M+H	C7H15NO2	53.2	0	PW_C000899;HMDB0001161	-	-	map01100;map00310;map02010	Metabolism;Metabolism;Environmental Information Processing	Global and overview maps;Amino acid metabolism;Membrane transport	Lipids and lipid-like molecules	Fatty Acyls	Fatty acids and conjugates	53.2	0	Metabolic pathways;Lysine degradation;ABC transporters	Metabolic pathways;Lysine degradation;ABC transporters	1.4836	1.4792	0.0009672	0.04688	5.8391	5.8565	5.8329	5.8215	5.8176	5.7648	5.7347	5.7457	5.6915	5.7875
pos_316	Cis-Vaccenic acid	metab_7496	yes	C21944	pos	506-17-2	283.263	0.358167	M+H-H2O, M+H	C18H34O2	0	60.7	HMDB0240219;LMFA01030076	-	-	-	-	-	Lipids and lipid-like molecules	Fatty Acyls	Fatty acids and conjugates	0	60.7	-	-	1.0035	0.995	0.01089	0.1631	6.3488	6.3994	6.4091	6.4253	6.4069	6.425	6.4481	6.4494	6.442	6.4561
neg_2185	Dihydrozeatin-O-glucoside	metab_9156	yes	C16448	neg	62512-96-3	428.178	2.24407	M+FA-H	C16H25N5O6	0	43.3	HMDB0012214	-	-	map01110;map00908	Metabolism;Metabolism	Global and overview maps;Metabolism of terpenoids and polyketides	Lipids and lipid-like molecules	Fatty Acyls	Fatty acyl glycosides	0	43.3	Biosynthesis of secondary metabolites;Zeatin biosynthesis	Biosynthesis of secondary metabolites;Zeatin biosynthesis	1.0079	1.0007	0.002614	0.05805	5.576	5.5649	5.5615	5.5423	5.5576	5.5178	5.4722	5.5101	5.5057	5.538
neg_2397	7,8-Dihydrovomifoliol 9-[apiosyl-(1->6)-glucoside]	metab_9388	yes	-	neg	177261-70-0	519.242	2.55692	M-H	C24H40O12	0	61.3	HMDB0029771	-	-	-	-	-	Lipids and lipid-like molecules	Fatty Acyls	Fatty acyl glycosides	0	61.3	-	-	1.3296	1.3234	0.0005076	0.02629	5.2919	5.3373	5.3244	5.3163	5.3548	5.2044	5.2543	5.2321	5.2429	5.2682
neg_2463	Blumenol C O-[rhamnosyl-(1->6)-glucoside]	metab_9462	yes	-	neg	177261-67-5	539.247	2.64547	M+Na-2H	C25H42O11	0	37	HMDB0031935	-	-	-	-	-	Lipids and lipid-like molecules	Fatty Acyls	Fatty acyl glycosides	0	37	-	-	1.6739	1.6662	0.0003082	0.02106	5.2269	5.2326	5.2263	5.1953	5.2322	5.1291	5.0544	5.1109	5.0287	5.1298
neg_3639	Ethyl 3-hydroxyoctanoate O-[glucosyl-(1->6)-glucoside]	metab_10748	yes	-	neg	-	493.23	4.14103	M-H2O-H	C22H40O13	0	35.6	HMDB0038738	-	-	-	-	-	Lipids and lipid-like molecules	Fatty Acyls	Fatty acyl glycosides	0	35.6	-	-	1.0472	1.0328	0.01565	0.1365	5.2072	5.2131	5.2462	5.2749	5.2605	5.1447	5.1513	5.1933	5.2307	5.1687
neg_7002	(R)-1-O-[b-D-Glucopyranosyl-(1->6)-b-D-glucopyranoside]-1,3-octanediol	metab_14384	yes	-	neg	-	491.215	4.27705	M+Na-2H	C20H38O12	0	63.9	HMDB0032799	-	-	-	-	-	Lipids and lipid-like molecules	Fatty Acyls	Fatty acyl glycosides	0	63.9	-	-	1.3408	1.3326	0.0007277	0.03019	5.4779	5.4481	5.5018	5.4222	5.4666	5.5803	5.5366	5.5561	5.551	5.5259
pos_1923	(3b,9R)-5-Megastigmene-3,9-diol 9-[apiosyl-(1->6)-glucoside]	metab_993	yes	-	pos	347852-04-4	570.287	1.95283	M+ACN+Na	C24H42O11	0	46.8	LMFA13010056;HMDB0038327	-	-	-	-	-	Lipids and lipid-like molecules	Fatty Acyls	Fatty acyl glycosides	0	46.8	-	-	1.14	1.1405	0.02987	0.2674	6.0412	6.013	6.0814	6.0719	6.0543	5.938	5.9602	6.0564	5.9516	6.0186
pos_7074	S-(2-Methylbutanoyl)-dihydrolipoamide	metab_6510	yes	C05118	pos	-	274.13	1.61812	M+H-H2O	C13H25NO2S2	0	48.7	PW_C002980;HMDB0006869	-	-	-	-	-	Lipids and lipid-like molecules	Fatty Acyls	Fatty acyl thioesters	0	48.7	-	-	2.6972	2.6795	0.002522	0.07569	5.3702	5.6211	5.5465	5.5146	5.7766	5.7926	5.9157	5.9112	5.8687	5.8602
pos_208	Falcarindiol	metab_1160	yes	C08449	pos	55297-87-5	225.164	5.76225	M+H-2H2O, 2M+NH4, M+H-H2O	C17H24O2	0	61.2	LMFA05000658;HMDB0244257;HMDB0033941	-	-	-	-	-	Lipids and lipid-like molecules	Fatty Acyls	Fatty alcohols	0	61.2	-	-	1.3029	1.299	0.02138	0.2303	5.1393	5.2523	5.2696	5.1451	5.2498	5.3125	5.311	5.2907	5.2946	5.2684
neg_5684	Palmitaldehyde	metab_12958	yes	C00517	neg	629-80-1	285.243	5.97808	M+FA-H	C16H32O	0	37.7	LMFA06000088;PW_C001193;HMDB0001551	-	-	map00071	Metabolism	Lipid metabolism	Lipids and lipid-like molecules	Fatty Acyls	Fatty aldehydes	0	37.7	Fatty acid degradation	Fatty acid degradation	1.5044	1.4911	0.001236	0.03851	5.0137	5.0444	5.0633	5.1198	5.0394	5.1571	5.183	5.1847	5.1158	5.1939
pos_4589	N-Isobutyl-2,4,8-decatrienamide	metab_3872	yes	-	pos	52657-13-3	443.363	5.77788	2M+H	C14H23NO	0	53.1	HMDB0030188	-	-	-	-	-	Lipids and lipid-like molecules	Fatty Acyls	Fatty amides	0	53.1	-	-	1.8839	1.8774	0.02142	0.2303	5.4952	5.7023	5.4572	5.4149	5.5023	5.6597	5.7493	5.6394	5.6014	5.7979
neg_3073	Cadabicine methyl ether	metab_10131	yes	-	neg	-	484.205	3.41712	M+Cl	C26H31N3O4	0	41.9	HMDB0039857	-	-	-	-	-	Phenylpropanoids and polyketides	Flavonoids	Flavonoid glycosides	0	41.9	-	-	1.0914	1.0798	0.004162	0.07302	5.1286	5.0648	5.1172	5.1151	5.0826	5.0082	5.0255	5.0592	5.0482	5.0584
neg_2772	Fumonisin B2	metab_9798	yes	C19242	neg	116355-84-1	742.338	3.06362	M+K-2H	C34H59NO14	0	70.2	LMSP01080023;HMDB0034703	-	-	-	-	-	Organic acids and derivatives	Carboxylic acids and derivatives	Fumonisins	0	70.2	-	-	1.1459	1.1323	0.005161	0.08134	6.0439	6.0694	6.0999	6.134	6.1077	6.0425	6.0074	6.0043	6.0108	6.0458
pos_2382	Artabsin	metab_1488	yes	C09301	pos	24399-20-0	266.175	2.79463	M+NH4	C15H20O3	0	51.9	HMDB0036641	-	-	-	-	-	Organoheterocyclic compounds	Lactones	Gamma butyrolactones	0	51.9	-	-	1.2732	1.268	0.01673	0.2055	5.0587	5.0361	5.0197	4.9578	4.9825	4.8768	4.908	4.9825	4.9421	4.9551
pos_7291	2-C-Methyl-1,4-erythrono-D-lactone	metab_6737	yes	-	pos	18465-71-9	150.077	0.91145	M+NH4	C5H8O4	0	42.4	HMDB0029884	-	-	-	-	-	Organoheterocyclic compounds	Lactones	Gamma butyrolactones	0	42.4	-	-	1.606	1.6018	0.01674	0.2055	4.8165	4.7976	4.9149	4.804	4.863	4.7397	4.8043	4.7599	4.6136	4.6558
neg_6643	PA(8:0/i-12:0)	metab_13994	yes	C00416	neg	-	501.256	4.79413	M+Na-2H	C23H45O8P	0	40	HMDB0115685;PW_C064070	Lipids	Phospholipids	map01100;map00564;map01110;map00561;map05212;map05200;map04975;map04024;map05231;map04072;map04912;map04070;map04666	Metabolism;Metabolism;Metabolism;Metabolism;Human Diseases;Human Diseases;Organismal Systems;Environmental Information Processing;Human Diseases;Environmental Information Processing;Organismal Systems;Environmental Information Processing;Organismal Systems	Global and overview maps;Lipid metabolism;Global and overview maps;Lipid metabolism;Cancer: specific types;Cancer: overview;Digestive system;Signal transduction;Cancer: overview;Signal transduction;Endocrine system;Signal transduction;Immune system	Lipids and lipid-like molecules	Glycerophospholipids	Glycerophosphates	0	40	Metabolic pathways;Glycerophospholipid metabolism;Biosynthesis of secondary metabolites;Glycerolipid metabolism;Pancreatic cancer;Pathways in cancer;Fat digestion and absorption;cAMP signaling pathway;Choline metabolism in cancer;Phospholipase D signaling pathway;GnRH signaling pathway;Phosphatidylinositol signaling system;Fc gamma R-mediated phagocytosis	Metabolic pathways;Glycerophospholipid metabolism;Biosynthesis of secondary metabolites;Glycerolipid metabolism;Pancreatic cancer;Pathways in cancer;Fat digestion and absorption;cAMP signaling pathway;Choline metabolism in cancer;Phospholipase D signaling pathway;GnRH signaling pathway;Phosphatidylinositol signaling system;Fc gamma R-mediated phagocytosis	1.1297	1.1216	0.004498	0.0767	4.8811	4.8704	4.8488	4.8439	4.8927	4.9761	4.8956	4.9165	4.9263	4.956
pos_2479	PA(18:4(6Z,9Z,12Z,15Z)/14:1(9Z))	metab_1594	yes	C00416	pos	-	683.371	2.96622	M+2Na-H	C35H59O8P	0	55.3	HMDB0115028;PW_C062446;LMGP10010426	Lipids	Phospholipids	map01100;map00564;map01110;map00561;map05212;map05200;map04975;map04024;map05231;map04072;map04912;map04070;map04666	Metabolism;Metabolism;Metabolism;Metabolism;Human Diseases;Human Diseases;Organismal Systems;Environmental Information Processing;Human Diseases;Environmental Information Processing;Organismal Systems;Environmental Information Processing;Organismal Systems	Global and overview maps;Lipid metabolism;Global and overview maps;Lipid metabolism;Cancer: specific types;Cancer: overview;Digestive system;Signal transduction;Cancer: overview;Signal transduction;Endocrine system;Signal transduction;Immune system	Lipids and lipid-like molecules	Glycerophospholipids	Glycerophosphates	0	55.3	Metabolic pathways;Glycerophospholipid metabolism;Biosynthesis of secondary metabolites;Glycerolipid metabolism;Pancreatic cancer;Pathways in cancer;Fat digestion and absorption;cAMP signaling pathway;Choline metabolism in cancer;Phospholipase D signaling pathway;GnRH signaling pathway;Phosphatidylinositol signaling system;Fc gamma R-mediated phagocytosis	Metabolic pathways;Glycerophospholipid metabolism;Biosynthesis of secondary metabolites;Glycerolipid metabolism;Pancreatic cancer;Pathways in cancer;Fat digestion and absorption;cAMP signaling pathway;Choline metabolism in cancer;Phospholipase D signaling pathway;GnRH signaling pathway;Phosphatidylinositol signaling system;Fc gamma R-mediated phagocytosis	1.5307	1.5327	0.002879	0.08186	6.4751	6.4491	6.4246	6.3802	6.4225	6.5569	6.5142	6.5383	6.5715	6.471
pos_2488	PA(14:1(9Z)/18:3(6Z,9Z,12Z))	metab_1604	yes	C00416	pos	-	685.386	2.98183	M+2Na-H	C35H61O8P	0	34.3	LMGP10010120;PW_C062214;HMDB0114797	Lipids	Phospholipids	map01100;map00564;map01110;map00561;map05212;map05200;map04975;map04024;map05231;map04072;map04912;map04070;map04666	Metabolism;Metabolism;Metabolism;Metabolism;Human Diseases;Human Diseases;Organismal Systems;Environmental Information Processing;Human Diseases;Environmental Information Processing;Organismal Systems;Environmental Information Processing;Organismal Systems	Global and overview maps;Lipid metabolism;Global and overview maps;Lipid metabolism;Cancer: specific types;Cancer: overview;Digestive system;Signal transduction;Cancer: overview;Signal transduction;Endocrine system;Signal transduction;Immune system	Lipids and lipid-like molecules	Glycerophospholipids	Glycerophosphates	0	34.3	Metabolic pathways;Glycerophospholipid metabolism;Biosynthesis of secondary metabolites;Glycerolipid metabolism;Pancreatic cancer;Pathways in cancer;Fat digestion and absorption;cAMP signaling pathway;Choline metabolism in cancer;Phospholipase D signaling pathway;GnRH signaling pathway;Phosphatidylinositol signaling system;Fc gamma R-mediated phagocytosis	Metabolic pathways;Glycerophospholipid metabolism;Biosynthesis of secondary metabolites;Glycerolipid metabolism;Pancreatic cancer;Pathways in cancer;Fat digestion and absorption;cAMP signaling pathway;Choline metabolism in cancer;Phospholipase D signaling pathway;GnRH signaling pathway;Phosphatidylinositol signaling system;Fc gamma R-mediated phagocytosis	1.1165	1.1155	0.00119	0.05021	6.3077	6.297	6.2845	6.2728	6.284	6.3284	6.3135	6.3445	6.358	6.356
neg_4976	PE-NMe(15:0/18:1(9Z))	metab_12190	yes	C01241	neg	-	716.523	6.72757	M-H	C39H76NO8P	0	47.1	PW_C057516;HMDB0112953	-	-	-	-	-	Lipids and lipid-like molecules	Glycerophospholipids	Glycerophosphoethanolamines	0	47.1	-	-	2.0334	2.0198	1.295e-06	0.00151	5.3967	5.4002	5.4435	5.4285	5.3991	5.5837	5.6261	5.5629	5.6016	5.5943
neg_7398	LysoPE(P-16:0/0:0)	metab_14813	yes	-	neg	174062-72-7	458.262	3.84917	M+Na-2H	C21H44NO6P	0	52.4	HMDB0011152	-	-	-	-	-	Lipids and lipid-like molecules	Glycerophospholipids	Glycerophosphoethanolamines	0	52.4	-	-	1.315	1.3043	0.01232	0.1204	5.0253	4.9737	4.9653	4.8811	4.9054	5.0763	5.0705	5.0485	5.058	4.9859
neg_2381	Z-Vdvad-fmk	metab_9371	yes	-	neg	-	694.317	2.53303	M-H	C32H46FN5O11	0	41.3	HMDB0259976	-	-	-	-	-	Organic acids and derivatives	Peptidomimetics	Hybrid peptides	0	41.3	-	-	1.2567	1.2476	0.0001507	0.01389	6.2844	6.2802	6.2738	6.2351	6.2658	6.346	6.3339	6.3288	6.3632	6.3312
neg_8742	Glu-Ile-Leu-Asp-Val	metab_16282	yes	-	neg	-	624.263	2.38802	M+K-2H	C26H45N5O10	0	87.6	HMDB0252757	-	-	-	-	-	Organic acids and derivatives	Peptidomimetics	Hybrid peptides	0	87.6	-	-	1.0882	1.0763	0.01077	0.1149	5.7293	5.6991	5.698	5.649	5.7545	5.7744	5.7397	5.7667	5.7909	5.787
pos_7218	Beta-Alanyl-L-arginine	metab_6663	yes	C05340	pos	-	228.145	1.09908	M+H-H2O	C9H19N5O3	0	52.7	HMDB0060441	-	-	map01100;map00410	Metabolism;Metabolism	Global and overview maps;Metabolism of other amino acids	Organic acids and derivatives	Peptidomimetics	Hybrid peptides	0	52.7	Metabolic pathways;beta-Alanine metabolism	Metabolic pathways;beta-Alanine metabolism	1.0651	1.0587	0.001279	0.0516	6.3125	6.3003	6.2833	6.2774	6.2996	6.2763	6.2384	6.2459	6.2392	6.2433
neg_3648	Avenanthramide 1f	metab_10758	yes	-	neg	-	294.077	4.14905	M-H2O-H	C17H15NO5	0	34.6	HMDB0029283	-	-	-	-	-	Phenylpropanoids and polyketides	Cinnamic acids and derivatives	Hydroxycinnamic acids and derivatives	0	34.6	-	-	1.2569	1.2457	0.01102	0.1164	5.8864	5.8167	5.8399	5.8455	5.8722	5.7174	5.6954	5.8022	5.8091	5.7956
neg_7568	Subaphylline	metab_15000	yes	C10497	neg	501-13-3	573.289	3.64232	2M+FA-H	C14H20N2O3	0	61	HMDB0033463	-	-	map01100;map00330	Metabolism;Metabolism	Global and overview maps;Amino acid metabolism	Phenylpropanoids and polyketides	Cinnamic acids and derivatives	Hydroxycinnamic acids and derivatives	0	61	Metabolic pathways;Arginine and proline metabolism	Metabolic pathways;Arginine and proline metabolism	1.026	1.0141	0.02892	0.1903	4.8439	4.839	4.813	4.7653	4.8402	4.7925	4.7007	4.7257	4.8027	4.7559
neg_1598	5-Aminoimidazole-4-Carboxamide	metab_8538	yes	C04051	neg	360-97-4	125.046	0.608917	M-H	C4H6N4O	42	0	PW_C001801;HMDB0003192	-	-	map01100;map00230	Metabolism;Metabolism	Global and overview maps;Nucleotide metabolism	Organoheterocyclic compounds	Azoles	Imidazoles	42	0	Metabolic pathways;Purine metabolism	Metabolic pathways;Purine metabolism	1.7251	1.7142	0.0005085	0.02629	3.7545	3.7234	3.6794	3.7083	3.6307	3.5061	3.5794	3.5733	3.5475	3.5807
neg_1646	Urocanic Acid	metab_8592	yes	C00785	neg	104-98-3;3465-72-3	137.035	0.640783	M-H	C6H6N2O2	82.8	0	HMDB0000301;HMDB0062562;PW_C000205;MJDBOTE0000716	-	-	map01100;map00340	Metabolism;Metabolism	Global and overview maps;Amino acid metabolism	Organoheterocyclic compounds	Azoles	Imidazoles	82.8	0	Metabolic pathways;Histidine metabolism	Metabolic pathways;Histidine metabolism	1.5998	1.5796	0.0218	0.1634	4.4451	4.5065	4.4792	4.545	4.6418	4.5171	4.6746	4.715	4.7181	4.7507
neg_8880	4-[4-(4-Fluorophenyl)-1-(3-phenylpropyl)-5-(4-pyridinyl)-1H-imidazol-2-yl]-3-butyn-1-ol	metab_16435	yes	-	neg	-	470.189	2.24407	M+FA-H	C27H24FN3O	0	40.4	HMDB0245616	-	-	-	-	-	Organoheterocyclic compounds	Azoles	Imidazoles	0	40.4	-	-	1.1603	1.1433	0.004643	0.07731	5.3864	5.3822	5.4232	5.4698	5.4126	5.3335	5.3343	5.3263	5.3633	5.3683
pos_2597	Grapiprant	metab_1717	yes	-	pos	-	492.208	3.28585	M+H	C26H29N5O3S	0	33.6	HMDB0252937	-	-	-	-	-	Organoheterocyclic compounds	Azoles	Imidazoles	0	33.6	-	-	1.4591	1.467	0.03615	0.2918	5.4905	5.4224	5.4536	5.3514	5.3745	5.5595	5.4198	5.6021	5.6141	5.4705
pos_32	Methylimidazoleacetic acid	metab_2350	yes	C05828	pos	2625-49-2	173.092	0.895967	M+H, M+Na, M+K, M+CH3OH+H, M+H-H2O	C6H8N2O2	0	32.6	HMDB0002820;PW_C001712	-	-	map01100;map00340	Metabolism;Metabolism	Global and overview maps;Amino acid metabolism	Organoheterocyclic compounds	Azoles	Imidazoles	0	32.6	Metabolic pathways;Histidine metabolism	Metabolic pathways;Histidine metabolism	1.0611	1.057	0.0003064	0.02503	7.2737	7.2731	7.2908	7.2682	7.284	7.2469	7.2441	7.2263	7.2389	7.2152
neg_2840	Etodolac	metab_9874	yes	C06991	neg	41340-25-4	308.125	3.1441	M+Na-2H	C17H21NO3	0	49.7	HMDB0014887;PW_C009220;MJDBOTE0001379	-	-	-	-	-	Organoheterocyclic compounds	Indoles and derivatives	Indolyl carboxylic acids and derivatives	0	49.7	-	-	1.2175	1.2123	0.006037	0.08598	4.8116	4.8519	4.8024	4.8666	4.806	4.7314	4.7633	4.7087	4.7324	4.8064
neg_6669	Indolelactic acid	metab_14022	yes	C02043	neg	7417-65-4	204.066	4.7522	M-H	C11H11NO3	95.5	0	HMDB0000671	-	-	-	-	-	Organoheterocyclic compounds	Indoles and derivatives	Indolyl carboxylic acids and derivatives	95.5	0	-	-	1.2135	1.2037	1.842e-05	0.006126	5.0582	5.0729	5.0399	5.0594	5.0564	5.1328	5.1271	5.1102	5.1111	5.1318
pos_5964	Dazmegrel	metab_5320	yes	-	pos	-	584.303	2.82572	2M+NH4	C16H17N3O2	0	34.6	HMDB0250884	-	-	-	-	-	Organoheterocyclic compounds	Indoles and derivatives	Indolyl carboxylic acids and derivatives	0	34.6	-	-	1.2342	1.2318	0.01296	0.1809	5.6666	5.6597	5.5676	5.6535	5.6446	5.7154	5.6653	5.7023	5.7486	5.7196
pos_6312	5-Methoxyindoleacetate	metab_5702	yes	C05660	pos	3471-31-6	247.107	2.34205	M+ACN+H	C11H11NO3	0	55.5	HMDB0004096;PW_C002060	-	-	map00380	Metabolism	Amino acid metabolism	Organoheterocyclic compounds	Indoles and derivatives	Indolyl carboxylic acids and derivatives	0	55.5	Tryptophan metabolism	Tryptophan metabolism	1.2825	1.2786	0.000743	0.04196	5.7763	5.8269	5.7794	5.7617	5.7928	5.8564	5.8618	5.8479	5.8658	5.8335
neg_5618	10-Nitrolinoleic acid	metab_12886	yes	C13800	neg	774603-04-2	306.207	6.0788	M-H2O-H	C18H31NO4	0	41.8	HMDB0005049	-	-	-	-	-	Lipids and lipid-like molecules	Fatty Acyls	Lineolic acids and derivatives	0	41.8	-	-	1.0284	1.029	0.03078	0.1967	5.8558	5.8615	5.8044	5.8665	5.829	5.8762	5.9118	5.8882	5.8746	5.9927
neg_4190	Lycorine	metab_11347	yes	C08532	neg	476-28-8	308.092	5.1481	M+Na-2H	C16H17NO4	0	40.5	HMDB0254256;MJDBOTE0000964	-	-	map00950;map01063	Metabolism;Metabolism	Biosynthesis of other secondary metabolites;Chemical structure transformation maps	Alkaloids and derivatives	Amaryllidaceae alkaloids	Lycorine-type amaryllidaceae alkaloids	0	40.5	Isoquinoline alkaloid biosynthesis;Biosynthesis of alkaloids derived from shikimate pathway	Isoquinoline alkaloid biosynthesis;Biosynthesis of alkaloids derived from shikimate pathway	1.1161	1.1083	0.0163	0.1392	6.7554	6.6673	6.7263	6.706	6.7521	6.6293	6.593	6.6903	6.6547	6.6781
neg_1070	Dhesn	metab_7958	yes	-	neg	-	530.279	5.49008	M-H2O-H, M+Cl	C30H39N5O5	0	72.5	HMDB0251109	-	-	-	-	-	Alkaloids and derivatives	Ergoline and derivatives	Lysergic acids and derivatives	0	72.5	-	-	1.6846	1.6666	0.0001109	0.01315	5.3509	5.4128	5.3945	5.4006	5.4083	5.559	5.5272	5.5376	5.4704	5.5186
pos_2639	Methoxamine	metab_1763	yes	C07513	pos	390-28-3	194.117	3.48815	M+H-H2O	C11H17NO3	0	37.8	HMDB0014861	-	-	-	-	-	Benzenoids	Benzene and substituted derivatives	Methoxybenzenes	0	37.8	-	-	2.7564	2.7464	0.000208	0.01963	5.4343	5.4617	5.4309	5.3449	5.4067	5.0814	4.9928	5.1281	5.2271	5.1884
pos_3868	Vanillylamine	metab_3084	yes	C16666	pos	1196-92-5	136.076	7.64143	M+H-H2O	C8H11NO2	0	57.6	HMDB0012309	-	-	map01100;map00996;map01110;map01063	Metabolism;Metabolism;Metabolism;Metabolism	Global and overview maps;Biosynthesis of other secondary metabolites;Global and overview maps;Chemical structure transformation maps	Benzenoids	Phenols	Methoxyphenols	0	57.6	Metabolic pathways;Biosynthesis of various alkaloids;Biosynthesis of secondary metabolites;Biosynthesis of alkaloids derived from shikimate pathway	Metabolic pathways;Biosynthesis of various alkaloids;Biosynthesis of secondary metabolites;Biosynthesis of alkaloids derived from shikimate pathway	1.2039	1.199	0.0001716	0.0171	4.9613	4.9723	4.9825	5.0037	4.9642	5.0245	5.0269	5.0287	5.0414	5.0397
neg_5722	MG(0:0/22:4(7Z,10Z,13Z,16Z)/0:0)	metab_13001	yes	-	neg	-	451.306	5.9131	M+FA-H	C25H42O4	0	66.2	HMDB0011554	-	-	-	-	-	Lipids and lipid-like molecules	Glycerolipids	Monoradylglycerols	0	66.2	-	-	1.0132	1.001	0.04036	0.2253	4.654	4.7163	4.6646	4.6394	4.6922	4.7298	4.6948	4.8089	4.775	4.6882
pos_6040	Goyasaponin I	metab_5404	yes	-	pos	333333-20-3	690.324	2.70878	M+2H	C65H102O31	0	66.8	HMDB0037221	-	-	-	-	-	Lipids and lipid-like molecules	Prenol lipids	Monoterpenoids	0	66.8	-	-	1.0878	1.0857	0.04814	0.314	6.4874	6.4572	6.495	6.4926	6.4519	6.3703	6.3841	6.3865	6.5158	6.3999
neg_8313	Landiolol	metab_15812	yes	-	neg	-	530.247	2.91883	M+Na-2H	C25H39N3O8	0	74	HMDB0253969	-	-	-	-	-	Organoheterocyclic compounds	Oxazinanes	Morpholines	0	74	-	-	1.1096	1.1065	0.003737	0.06846	5.9977	5.9852	5.9764	5.9614	6.0334	5.9006	5.9107	5.9328	5.9273	5.9606
neg_7825	N-(3-acetamidopropyl)pyrrolidin-2-one	metab_15279	yes	-	neg	106692-36-8	413.24	3.39313	2M+FA-H	C9H16N2O2	0	32.6	HMDB0061384	-	-	-	-	-	Organoheterocyclic compounds	Pyrrolidines	N-alkylpyrrolidines	0	32.6	-	-	1.086	1.077	0.01885	0.1512	4.9665	5.0389	4.979	5.0547	4.9659	4.9485	4.9298	4.8809	4.9421	4.9597
neg_9729	TETRATHIONIC ACID	metab_17312	yes	C02084	neg	13760-29-7	224.866	0.6487	M-H	H2O6S4	0	43.2	HMDB0258934	-	-	map01100;map02020;map00920;map01120	Metabolism;Environmental Information Processing;Metabolism;Metabolism	Global and overview maps;Signal transduction;Energy metabolism;Global and overview maps	Homogeneous non-metal compounds	Non-metal oxoanionic compounds	Non-metal tetrathionates	0	43.2	Metabolic pathways;Two-component system;Sulfur metabolism;Microbial metabolism in diverse environments	Metabolic pathways;Two-component system;Sulfur metabolism;Microbial metabolism in diverse environments	2.034	2.0177	0.001148	0.03769	4.9523	5.0357	5.1552	5.1332	5.095	5.2612	5.3322	5.2905	5.2194	5.2791
neg_1059	1,4-Butanediol diglycidyl ether	metab_7945	yes	-	neg	-	463.256	5.4309	M-H2O-H, 2M+Hac-H	C10H18O4	0	62	HMDB0244203	-	-	-	-	-	Organoheterocyclic compounds	Epoxides	Not Available	0	62	-	-	1.0478	1.0398	0.04279	0.2318	5.0584	5.1056	5.1035	5.1465	5.053	5.0021	5.0063	4.9572	5.0476	5.0992
neg_2337	Tigecycline	metab_9322	yes	C12012	neg	220620-09-7	584.268	2.46053	M-H	C29H39N5O8	0	55.3	PW_C009054;HMDB0014700	-	-	-	-	-	Phenylpropanoids and polyketides	Tetracyclines	Not Available	0	55.3	-	-	1.0979	1.0918	0.007705	0.09676	5.6419	5.6344	5.6786	5.6612	5.7138	5.5925	5.5817	5.5933	5.5863	5.6475
neg_2667	Vindoline	metab_9682	yes	C01626	neg	2182-14-1	437.204	2.9354	M-H2O-H	C25H32N2O6	0	53.7	HMDB0259814;MJDBOTE0000982	-	-	map01110;map01063;map00901	Metabolism;Metabolism;Metabolism	Global and overview maps;Chemical structure transformation maps;Biosynthesis of other secondary metabolites	Alkaloids and derivatives	Plumeran-type alkaloids	Not Available	0	53.7	Biosynthesis of secondary metabolites;Biosynthesis of alkaloids derived from shikimate pathway;Indole alkaloid biosynthesis	Biosynthesis of secondary metabolites;Biosynthesis of alkaloids derived from shikimate pathway;Indole alkaloid biosynthesis	1.9588	1.9432	0.001362	0.04017	4.6755	4.6941	4.6288	4.6845	4.7139	4.4971	4.5467	4.3563	4.4858	4.5665
neg_3172	Norbinaltorphimine	metab_10240	yes	C18130	neg	105618-26-6	696.285	3.5378	M+Cl	C40H43N3O6	0	83.8	HMDB0255724	-	-	-	-	-	Alkaloids and derivatives	Morphinans	Not Available	0	83.8	-	-	1.3287	1.3185	0.001147	0.03769	5.3417	5.3364	5.321	5.2965	5.3346	5.4266	5.3737	5.4414	5.4439	5.3766
neg_4558	DG(6 keto-PGF1alpha/2:0/0:0)	metab_11750	yes	-	neg	-	523.231	5.62835	M+K-2H	C25H42O9	0	36.1	HMDB0296912	-	-	-	-	-	Not Available	Not Available	Not Available	0	36.1	-	-	1.2844	1.2771	0.0001873	0.01578	5.7497	5.7327	5.7259	5.7011	5.7498	5.6609	5.6517	5.6678	5.6688	5.6278
neg_5726	Harmalol	metab_13005	yes	C06537	neg	525-57-5	399.184	5.90458	2M-H	C12H12N2O	0	33.4	HMDB0029838	-	-	-	-	-	Alkaloids and derivatives	Harmala alkaloids	Not Available	0	33.4	-	-	1.6292	1.6256	0.006224	0.08677	4.8069	4.8067	4.7834	4.7378	4.7021	4.6085	4.745	4.6343	4.5559	4.5774
neg_5961	7-O-Succinyl macrolactin A	metab_13253	yes	-	neg	-	483.236	5.66828	M-H2O-H	C28H38O8	0	61.3	HMDB0247277	-	-	-	-	-	Phenylpropanoids and polyketides	Macrolides and analogues	Not Available	0	61.3	-	-	1.2438	1.2313	0.0008211	0.03165	6.7308	6.7094	6.7036	6.6814	6.7133	6.6751	6.6069	6.6215	6.642	6.621
neg_6050	N2-Maltulosylarginine	metab_13349	yes	-	neg	162966-06-5	479.197	5.62038	M-H2O-H	C18H34N4O12	0	43.9	HMDB0041542	-	-	-	-	-	Lipids and lipid-like molecules	Saccharolipids	Not Available	0	43.9	-	-	1.8369	1.825	0.02447	0.1738	4.5672	4.5148	4.5142	4.55	4.5333	4.0663	4.2823	4.405	4.4797	4.4203
neg_6222	3-hydroxyquinidine	metab_13532	yes	C07344	neg	53467-23-5	739.367	5.50802	2M+Hac-H	C20H24N2O3	0	30.7	HMDB0001091;HMDB0245907	-	-	-	-	-	Alkaloids and derivatives	Cinchona alkaloids	Not Available	0	30.7	-	-	2.0668	2.0458	0.0407	0.2262	4.253	4.2948	4.3307	4.6155	4.1908	4.2359	3.8814	4.1585	3.8236	4.2038
neg_6251	3-[2-[[(1S,2R,3S)-3-[4-(Pentylcarbamoyl)-1,3-oxazol-2-yl]-7-oxabicyclo[2.2.1]heptan-2-yl]methyl]phenyl]propanoic acid	metab_13563	yes	-	neg	-	421.209	5.49008	M-H2O-H	C25H32N2O5	0	65.8	HMDB0247885	-	-	-	-	-	Phenylpropanoids and polyketides	Phenylpropanoic acids	Not Available	0	65.8	-	-	1.5496	1.5367	0.0128	0.1225	4.7136	4.8163	4.7915	4.8587	4.7936	4.6936	4.655	4.5649	4.6098	4.7713
neg_709	5'-Deoxyadenosine	metab_14477	yes	C05198	neg	4754-39-6	250.094	1.05618	M-H, M+FA-H	C10H13N5O3	88.1	0	HMDB0001983	-	-	-	-	-	Nucleosides, nucleotides, and analogues	5''-deoxyribonucleosides	Not Available	88.1	0	-	-	1.8196	1.8065	0.0001226	0.01342	5.3216	5.2817	5.3054	5.3258	5.3396	5.1657	5.1298	5.1612	5.1234	5.2338
neg_7277	Queuosine	metab_14681	yes	-	neg	57072-36-3	454.162	3.97313	M+FA-H	C17H23N5O7	0	36.5	HMDB0011596	-	-	-	-	-	Nucleosides, nucleotides, and analogues	Pyrrolopyrimidine nucleosides and nucleotides	Not Available	0	36.5	-	-	4.2297	4.2026	0.001572	0.04387	4.5448	4.4803	4.5366	3.838	4.5332	3.6714	3.7674	3.185	3.6942	3.1868
neg_7495	Asimilobine	metab_14919	yes	-	neg	-	288.102	3.73698	M+Na-2H	C17H17NO2	0	41.7	HMDB0302145	-	-	-	-	-	Alkaloids and derivatives	Aporphines	Not Available	0	41.7	-	-	1.9242	1.9085	0.00222	0.05287	4.8429	4.7524	4.8071	4.8152	4.853	4.5352	4.5327	4.6959	4.6853	4.6893
neg_8056	PGP(i-12:0/PGF1alpha)	metab_15532	yes	-	neg	-	881.401	3.1601	M+Cl	C38H72O16P2	0	61.7	HMDB0274881	-	-	-	-	-	Not Available	Not Available	Not Available	0	61.7	-	-	1.0347	1.0283	0.0113	0.1176	6.0014	5.9723	5.961	5.9775	5.9688	5.8707	5.9308	5.8813	5.9436	5.9551
neg_8307	Amabiline	metab_15805	yes	C10263	neg	17958-43-9	304.151	2.92678	M+Na-2H	C15H25NO4	0	31	HMDB0302358	-	-	-	-	-	Alkaloids and derivatives	Not Available	Not Available	0	31	-	-	1.249	1.2382	0.0006035	0.02748	4.8156	4.771	4.788	4.8112	4.8122	4.7092	4.7095	4.7577	4.7431	4.7068
neg_8343	PGP(22:5(7Z,10Z,13Z,16Z,19Z)/5-iso PGF2VI)	metab_15845	yes	-	neg	-	981.428	2.8869	M+Cl	C46H76O16P2	0	75.4	HMDB0274102	-	-	-	-	-	Not Available	Not Available	Not Available	0	75.4	-	-	2.2477	2.2455	0.04077	0.2262	4.2399	4.2668	4.4323	3.9162	4.1298	3.7201	3.7112	3.9124	3.7132	4.2628
neg_8388	PA(22:6(5Z,8E,10Z,13Z,15E,19Z)-2OH(7S, 17S)/8:0)	metab_15894	yes	-	neg	-	677.29	2.83837	M+K-2H	C33H53O10P	0	54.2	HMDB0266656	-	-	-	-	-	Not Available	Not Available	Not Available	0	54.2	-	-	1.0743	1.0697	0.0005477	0.02729	5.885	5.9055	5.9248	5.9088	5.9339	5.8363	5.8629	5.8593	5.8566	5.8668
neg_8745	1-Methylguanosine	metab_16285	yes	C04545	neg	2140-65-0	296.1	2.38802	M-H	C11H15N5O5	35.8	0	HMDB0001563	-	-	-	-	-	Nucleosides, nucleotides, and analogues	Purine nucleosides	Not Available	35.8	0	-	-	1.3826	1.3722	0.01211	0.1197	4.9931	4.9446	4.9093	4.864	4.9186	5.0994	5.0486	5.0357	5.045	4.9406
neg_9074	Adenosine 3'-monophosphate	metab_16643	yes	C01367	neg	84-21-9	346.056	1.88347	M-H	C10H14N5O7P	86.6	0	HMDB0003540	-	-	map01100;map00230	Metabolism;Metabolism	Global and overview maps;Nucleotide metabolism	Nucleosides, nucleotides, and analogues	Ribonucleoside 3''-phosphates	Not Available	86.6	0	Metabolic pathways;Purine metabolism	Metabolic pathways;Purine metabolism	2.023	2.0247	0.01208	0.1197	5.9337	6.0678	5.7804	5.7816	5.7771	5.6475	5.5632	5.6104	5.5579	5.7937
neg_9303	3-Methyl-2-benzothiazolone hydrazone	metab_16887	yes	-	neg	-	214.021	1.55618	M+Cl	C8H9N3S	0	31.9	HMDB0244395	-	-	-	-	-	Organoheterocyclic compounds	Benzothiazoles	Not Available	0	31.9	-	-	3.5041	3.4608	0.0005201	0.02647	5.5694	5.8222	5.6494	5.4616	5.993	6.1239	6.2958	6.3307	6.3811	6.259
pos_1060	Himbacine	metab_69	yes	C10598	pos	6879-74-9	363.3	5.6684	M+H, M+NH4	C22H35NO2	0	40.2	HMDB0253171	-	-	-	-	-	Organoheterocyclic compounds	Naphthofurans	Not Available	0	40.2	-	-	1.5629	1.5601	4.431e-06	0.003179	6.3515	6.3352	6.3219	6.3304	6.318	6.4218	6.4256	6.4304	6.4262	6.3984
pos_1120	4-Hydroxy Triamterene	metab_133	yes	-	pos	-	302.134	1.2007	M+H-H2O, M+CH3OH+H	C12H11N7O	0	34.1	HMDB0246440	-	-	-	-	-	Organoheterocyclic compounds	Pteridines and derivatives	Not Available	0	34.1	-	-	1.4537	1.4525	4.801e-05	0.009062	6.0139	5.9903	6.0009	6.0056	6.0118	5.8928	5.9405	5.9175	5.9337	5.9411
pos_131	(S)-scoulerine	metab_341	yes	C02106	pos	6451-73-6	696.33	1.922	M+H, 2M+ACN+H, M+H-H2O	C19H21NO4	0	41.8	HMDB0304001	-	-	map00950;map01100;map01110;map01063	Metabolism;Metabolism;Metabolism;Metabolism	Biosynthesis of other secondary metabolites;Global and overview maps;Global and overview maps;Chemical structure transformation maps	Alkaloids and derivatives	Protoberberine alkaloids and derivatives	Not Available	0	41.8	Isoquinoline alkaloid biosynthesis;Metabolic pathways;Biosynthesis of secondary metabolites;Biosynthesis of alkaloids derived from shikimate pathway	Isoquinoline alkaloid biosynthesis;Metabolic pathways;Biosynthesis of secondary metabolites;Biosynthesis of alkaloids derived from shikimate pathway	1.8477	1.8445	0.003128	0.08512	6.3215	6.2138	6.3405	6.2218	6.3315	6.4301	6.5041	6.3898	6.3908	6.4425
pos_1387	Palustrine	metab_425	yes	C10608	pos	22324-44-3	166.618	0.444033	M+H+Na	C17H31N3O2	0	33.1	HMDB0256095	-	-	-	-	-	Phenylpropanoids and polyketides	Macrolactams	Not Available	0	33.1	-	-	1.5325	1.5351	0.01397	0.1886	4.6392	4.5359	4.5078	4.5332	4.579	4.7115	4.6473	4.7315	4.6904	4.5767
pos_1477	(2R,3R,4R,5S)-2-(Hydroxymethyl)-1-nonylpiperidine-3,4,5-triol	metab_520	yes	-	pos	-	322.26	0.747583	M+CH3OH+H	C15H31NO4	0	31.9	HMDB0242572	-	-	-	-	-	Organoheterocyclic compounds	Piperidines	Not Available	0	31.9	-	-	1.6047	1.5949	0.006283	0.1242	7.1	7.0688	7.0834	6.9888	7.0358	6.9969	6.9639	6.8535	6.9479	6.9463
pos_1560	Pentostatin	metab_610	yes	C02267	pos	53910-25-1	286.15	1.1069	M+NH4	C11H16N4O4	0	51.8	HMDB0014692;HMDB0245535	-	-	-	-	-	Organoheterocyclic compounds	Imidazodiazepines	Not Available	0	51.8	-	-	1.3327	1.3338	0.004755	0.1083	6.2348	6.2744	6.2684	6.1969	6.2182	6.3394	6.2963	6.359	6.3005	6.2879
pos_2063	PA(PGJ2/12:0)	metab_1142	yes	-	pos	-	347.192	2.2094	M+H+Na	C35H59O10P	0	39	HMDB0262779	-	-	-	-	-	Not Available	Not Available	Not Available	0	39	-	-	1.0044	1.004	0.01791	0.2134	5.551	5.6318	5.5507	5.5807	5.5575	5.5313	5.5104	5.5207	5.546	5.5167
pos_2371	1,6-anhydro-N-acetyl-beta-muramate	metab_1476	yes	C19769	pos	-	292.129	2.7712	M+NH4	C11H16NO7-	0	36.1	HMDB0304012	-	-	map01100;map00520;map01250	Metabolism;Metabolism;Metabolism	Global and overview maps;Carbohydrate metabolism;Global and overview maps	Organoheterocyclic compounds	Oxepanes	Not Available	0	36.1	Metabolic pathways;Amino sugar and nucleotide sugar metabolism;Biosynthesis of nucleotide sugars	Metabolic pathways;Amino sugar and nucleotide sugar metabolism;Biosynthesis of nucleotide sugars	1.1983	1.1948	0.007534	0.1338	5.3806	5.3938	5.3478	5.303	5.3764	5.4031	5.4319	5.4296	5.41	5.4503
pos_3331	2-Phenylethanethiol	metab_2496	yes	-	pos	4410-99-5	180.084	5.65275	M+ACN+H	C8H10S	0	51.6	HMDB0032637	-	-	-	-	-	Benzenoids	Benzene and substituted derivatives	Not Available	0	51.6	-	-	1.5531	1.5487	0.01802	0.2141	6.0554	5.9604	6.0611	6.0629	6.0937	5.9214	5.8315	6.0071	5.9933	5.8953
pos_3646	PE(18:0/TXB2)	metab_2841	yes	-	pos	-	851.576	7.02225	M+NH4	C43H80NO12P	0	34.3	HMDB0261128	-	-	-	-	-	Not Available	Not Available	Not Available	0	34.3	-	-	1.2961	1.2832	0.01441	0.1904	6.0276	6.0592	5.9937	6.0812	6.059	6.0613	6.1695	6.1083	6.1099	6.1659
pos_395	(8R)-3-[(4S,5R)-4-Hydroxy-5-(hydroxymethyl)oxolan-2-yl]-7,8-dihydro-4H-imidazo[4,5-d][1,3]diazepin-8-ol	metab_3175	yes	-	pos	-	251.113	0.623083	M+H-H2O, M+NH4	C11H16N4O4	0	45.2	HMDB0245535	-	-	-	-	-	Organoheterocyclic compounds	Imidazodiazepines	Not Available	0	45.2	-	-	1.2712	1.2708	0.001879	0.06543	5.96	5.921	5.9621	5.9202	5.954	6.0351	6.0336	5.9779	5.991	6.0163
pos_4598	N-Docosahexaenoyl Arginine	metab_3882	yes	-	pos	-	449.325	5.77007	M+H-2H2O	C28H44N4O3	0	60.6	HMDB0242008	-	-	-	-	-	Not Available	Not Available	Not Available	0	60.6	-	-	1.0911	1.0915	0.01657	0.2055	5.6849	5.6152	5.6967	5.7007	5.6678	5.5833	5.6517	5.6153	5.6058	5.6206
pos_4728	Oxymorphone	metab_4027	yes	C08019	pos	76-41-5	302.142	5.69188	M+H	C17H19NO4	0	40.4	HMDB0015323;PW_C009605	-	-	-	-	-	Benzenoids	Phenanthrenes and derivatives	Not Available	0	40.4	-	-	1.2375	1.2372	0.002313	0.07212	5.1773	5.1342	5.1249	5.1815	5.1745	5.0663	5.0876	5.0923	5.1098	5.114
pos_5772	PS(22:5(4Z,7Z,10Z,13Z,16Z)/6 keto-PGF1alpha)	metab_5118	yes	-	pos	-	462.766	3.16123	M+2H	C48H78NO14P	0	34.4	HMDB0283320	-	-	-	-	-	Not Available	Not Available	Not Available	0	34.4	-	-	1.308	1.3056	0.03588	0.2912	6.0299	6.1227	5.9928	5.9125	6.0518	6.1187	6.1311	6.0767	6.1298	6.1069
pos_625	Penitrem B	metab_5632	yes	C20731	pos	11076-67-8	584.339	1.98375	M+2H, M+H	C37H45NO5	0	45.8	HMDB0242736;HMDB0256239	-	-	-	-	-	Organoheterocyclic compounds	Naphthopyrans	Not Available	0	45.8	-	-	1.0341	1.0371	0.02763	0.2632	6.4481	6.4529	6.4194	6.3546	6.4184	6.503	6.4781	6.4418	6.4878	6.459
pos_6250	AB-MECA	metab_5633	yes	-	pos	-	417.197	2.42017	M+NH4	C18H21N7O4	0	62.1	HMDB0242721	-	-	-	-	-	Nucleosides, nucleotides, and analogues	Purine nucleosides	Not Available	0	62.1	-	-	2.0945	2.0954	0.0008669	0.0452	5.5791	5.6627	5.665	5.6486	5.6495	5.3895	5.4666	5.451	5.4362	5.5744
pos_6293	PIP(PGF1alpha/18:0)	metab_5680	yes	-	pos	-	532.259	2.3655	M+2Na	C47H88O19P2	0	30.6	HMDB0278823	-	-	-	-	-	Not Available	Not Available	Not Available	0	30.6	-	-	1.4804	1.4794	0.00177	0.06379	5.7551	5.7869	5.7661	5.7433	5.7532	5.6194	5.6618	5.6465	5.6998	5.7219
pos_6361	5'-Deoxy-5-fluorouridine	metab_5754	yes	C12739	pos	3094-09-05	229.064	2.28742	M+H-H2O	C9H11FN2O5	0	37.9	PW_C040484;HMDB0060406	-	-	map00983	Metabolism	Xenobiotics biodegradation and metabolism	Nucleosides, nucleotides, and analogues	5''-deoxyribonucleosides	Not Available	0	37.9	Drug metabolism - other enzymes	Drug metabolism - other enzymes	2.6159	2.613	0.01621	0.2043	5.0802	5.1579	4.9181	5.1079	5.0359	4.6636	4.4711	4.6069	4.8595	5.0473
pos_6450	Morph	metab_5852	yes	C01516	pos	57-27-2	474.255	2.17037	2M+NH4	C10H16N2O4	0	53	HMDB0014440;HMDB0254890	-	-	map01100;map01110;map00982;map00950;map04080;map01063	Metabolism;Metabolism;Metabolism;Metabolism;Environmental Information Processing;Metabolism	Global and overview maps;Global and overview maps;Xenobiotics biodegradation and metabolism;Biosynthesis of other secondary metabolites;Signaling molecules and interaction;Chemical structure transformation maps	Alkaloids and derivatives	Morphinans	Not Available	0	53	Metabolic pathways;Biosynthesis of secondary metabolites;Drug metabolism - cytochrome P450;Isoquinoline alkaloid biosynthesis;Neuroactive ligand-receptor interaction;Biosynthesis of alkaloids derived from shikimate pathway	Metabolic pathways;Biosynthesis of secondary metabolites;Drug metabolism - cytochrome P450;Isoquinoline alkaloid biosynthesis;Neuroactive ligand-receptor interaction;Biosynthesis of alkaloids derived from shikimate pathway	2.1712	2.1684	0.002073	0.06875	5.2915	5.2198	5.3656	5.3487	5.3432	5.0773	5.1475	5.0018	5.2044	5.1528
pos_6623	PI(PGJ2/22:5(4Z,7Z,10Z,13Z,16Z))	metab_6029	yes	-	pos	-	504.247	1.95283	M+2Na	C51H79O15P	0	35.2	HMDB0278138	-	-	-	-	-	Not Available	Not Available	Not Available	0	35.2	-	-	1.5275	1.5207	0.03093	0.2718	6.0154	5.932	5.9183	6.0389	5.8771	6.0533	6.2069	6.0129	6.0844	6.0277
pos_7002	3'-Adenylic Acid	metab_6435	yes	C01367	pos	84-21-9	348.07	1.71937	M+H	C10H14N5O7P	70.2	0	HMDB0003540;HMDB0258140	-	-	map01100;map00230	Metabolism;Metabolism	Global and overview maps;Nucleotide metabolism	Nucleosides, nucleotides, and analogues	Ribonucleoside 3''-phosphates	Not Available	70.2	0	Metabolic pathways;Purine metabolism	Metabolic pathways;Purine metabolism	2.2824	2.2787	0.01176	0.1704	6.0735	6.2172	5.9019	5.888	5.9437	5.7404	5.6965	5.7161	5.7286	5.9253
pos_7166	Ethoxybenzyl diethylenetriamine	metab_6607	yes	-	pos	-	279.218	1.2007	M+ACN+H	C13H23N3O	0	39.8	HMDB0252022	-	-	-	-	-	Benzenoids	Benzene and substituted derivatives	Not Available	0	39.8	-	-	2.3069	2.2944	0.01584	0.2019	5.0433	5.0503	4.9599	4.904	4.712	4.7618	4.8174	4.5483	4.7243	4.546
pos_7209	1-Isothiocyanato-7-(methylthio)heptane	metab_6654	yes	-	pos	4430-38-0	445.121	1.1069	2M+K	C9H17NS2	0	40.5	HMDB0038440	-	-	-	-	-	Organosulfur compounds	Isothiocyanates	Not Available	0	40.5	-	-	1.0279	1.022	0.0296	0.2674	5.9722	6.0021	6.0123	5.9234	5.9723	5.9341	5.9274	5.9575	5.9169	5.8758
pos_7486	Pyrroline	metab_6933	yes	C19907	pos	109-97-7	70.0656	0.607633	M+H	C4H7N	0	44	HMDB0035924;HMDB0245392	-	-	-	-	-	Organoheterocyclic compounds	Heteroaromatic compounds	Not Available	0	44	-	-	1.2028	1.2012	0.001227	0.05058	5.753	5.7705	5.748	5.7571	5.7574	5.6923	5.7172	5.6874	5.7296	5.6643
pos_5667	17beta-Estradiol-3,4-quinone	metab_5017	yes	-	pos	-	614.35	3.47252	2M+ACN+H	C18H22O3	0	36.8	HMDB0060085	-	-	-	-	-	Lipids and lipid-like molecules	Steroids and steroid derivatives	Oxosteroids	0	36.8	-	-	1.8196	1.8199	0.003029	0.0839	6.1559	6.0282	5.9966	6.0465	5.9872	6.1968	6.2048	6.168	6.2186	6.134
pos_2353	4-(1-Hydroxy-2-{[1-(4-hydroxyphenyl)propan-2-yl]amino}ethyl)benzene-1,2-diol	metab_1456	yes	-	pos	-	624.334	2.7244	2M+NH4	C17H21NO4	0	44.6	HMDB0245699	-	-	-	-	-	Benzenoids	Benzene and substituted derivatives	Phenethylamines	0	44.6	-	-	1.1007	1.0925	0.0485	0.314	5.7456	5.772	5.7162	5.7562	5.7416	5.7673	5.6004	5.6891	5.6863	5.6562
pos_5864	Salmefamol	metab_5214	yes	C11771	pos	18910-65-1	354.165	2.97402	M+Na	C19H25NO4	0	35.4	HMDB0257468	-	-	-	-	-	Benzenoids	Benzene and substituted derivatives	Phenethylamines	0	35.4	-	-	2.2587	2.2629	0.04927	0.314	4.3044	4.6636	4.4179	4.5411	4.4595	3.9681	3.9635	4.5454	4.2579	4.222
neg_7149	Diethylenetriamine crosslinked with epichlorohydrin	metab_14541	yes	-	neg	25085-17-0	569.294	4.10903	2M+Hac-H	C14H22ClNO	0	47.5	HMDB0032216	-	-	-	-	-	Benzenoids	Benzene and substituted derivatives	Phenylbutylamines	0	47.5	-	-	1.2376	1.2338	0.01205	0.1197	5.5252	5.4751	5.4471	5.4307	5.4331	5.5697	5.5192	5.557	5.6094	5.4914
pos_1319	3-Pyridinemethanol, 6-amino-alpha-(((1-methyl-4-phenylbutyl)amino)methyl)-	metab_351	yes	-	pos	-	322.187	1.91418	M+H, M+Na	C18H25N3O	0	33.3	HMDB0253841	-	-	-	-	-	Benzenoids	Benzene and substituted derivatives	Phenylbutylamines	0	33.3	-	-	1.0843	1.0796	0.04446	0.314	5.6613	5.6826	5.7307	5.668	5.6749	5.7237	5.7663	5.7844	5.6659	5.7978
pos_6172	Avapritinib	metab_5549	yes	-	pos	-	531.276	2.52915	M+CH3OH+H	C26H27FN10	0	39.2	HMDB0304850	-	-	-	-	-	Organoheterocyclic compounds	Diazinanes	Piperazines	0	39.2	-	-	1.5695	1.5562	0.02833	0.2652	5.8705	5.7362	5.7505	5.7721	5.8608	5.7682	5.54	5.6863	5.7029	5.6678
pos_6234	Terazosin	metab_5616	yes	C07127	pos	63590-64-7	405.223	2.4358	M+NH4	C19H25N5O4	47.1	0	HMDB0015293	-	-	-	-	-	Organoheterocyclic compounds	Diazinanes	Piperazines	47.1	0	-	-	1.0121	1.0041	0.04652	0.314	5.7235	5.8002	5.7426	5.7421	5.8075	5.8041	5.8344	5.8698	5.7693	5.8177
neg_7350	1-Tert-Butyl 4-ethyl 3-oxopiperidine-1,4-dicarboxylate	metab_14762	yes	-	neg	-	292.115	3.88765	M+Na-2H	C13H21NO5	0	39.8	HMDB0247311	-	-	-	-	-	Organoheterocyclic compounds	Piperidines	Piperidinecarboxylic acids and derivatives	0	39.8	-	-	1.3497	1.3392	0.0003078	0.02106	5.3438	5.3484	5.3581	5.4065	5.37	5.2839	5.2705	5.3016	5.2524	5.2918
neg_8741	Didanosine	metab_16281	yes	C06953	neg	69655-05-6	281.089	2.39602	M+FA-H	C10H12N4O3	50	0	HMDB0015037;PW_C009350	-	-	-	-	-	Nucleosides, nucleotides, and analogues	Purine nucleosides	Purine 2'',3''-dideoxyribonucleosides	50	0	-	-	1.8323	1.8207	0.001941	0.04927	5.0419	5.0543	5.0253	4.9519	4.9881	5.283	5.173	5.1674	5.1989	5.0822
pos_7098	Deoxyguanosine	metab_6533	yes	C00330	pos	961-07-9	268.104	1.46467	M+H	C10H13N5O4	0	73.3	PW_C000058;HMDB0000085;MJDBOTE0000696	Nucleic acids	Nucleosides	map01100;map02010;map01232;map00230	Metabolism;Environmental Information Processing;Metabolism;Metabolism	Global and overview maps;Membrane transport;Global and overview maps;Nucleotide metabolism	Nucleosides, nucleotides, and analogues	Purine nucleosides	Purine 2''-deoxyribonucleosides	0	73.3	Metabolic pathways;ABC transporters;Nucleotide metabolism;Purine metabolism	Metabolic pathways;ABC transporters;Nucleotide metabolism;Purine metabolism	2.7854	2.7732	0.02972	0.2674	5.0932	4.9936	5.0812	5.1067	4.4709	4.3591	4.3544	4.7267	4.5193	4.7893
pos_1656	Cordycepin	metab_709	yes	C08431	pos	73-03-0	234.098	1.6103	M+H-H2O	C10H13N5O3	72.8	0	HMDB0250451;MJDBOTE0001321	-	-	-	-	-	Nucleosides, nucleotides, and analogues	Purine nucleosides	Purine 3''-deoxyribonucleosides	72.8	0	-	-	1.6343	1.6269	0.001687	0.06238	5.9773	5.9184	5.945	5.9243	5.9901	5.8497	5.7796	5.885	5.8194	5.8721
neg_1903	8-Hydroxyguanine	metab_8856	yes	C20155	neg	5614-64-2	166.036	1.41392	M-H	C5H5N5O2	0	39.7	HMDB0002032	-	-	-	-	-	Organoheterocyclic compounds	Imidazopyrimidines	Purines and purine derivatives	0	39.7	-	-	3.1729	3.127	0.004779	0.078	3.1644	3.6367	3.2609	3.1583	3.7643	3.7931	3.8399	4.0371	4.0065	3.9203
neg_1929	Oxypurinol	metab_8880	yes	C07599	neg	2465-59-0	151.025	1.55618	M-H	C5H4N4O2	86.5	0	HMDB0000786	-	-	-	-	-	Organoheterocyclic compounds	Imidazopyrimidines	Purines and purine derivatives	86.5	0	-	-	3.5019	3.4587	0.0004817	0.02572	6.6887	6.934	6.7732	6.5842	7.0997	7.2266	7.3919	7.4556	7.4967	7.3936
neg_762	Uric Acid	metab_15056	yes	C00366	neg	69-93-2	167.02	1.18403	M-H, 2M-H	C5H4N4O3	89.9	0	PW_C000195;HMDB0000289;MJDBOTE0001097	-	-	map01100;map04976;map00230;map01120	Metabolism;Organismal Systems;Metabolism;Metabolism	Global and overview maps;Digestive system;Nucleotide metabolism;Global and overview maps	Organoheterocyclic compounds	Imidazopyrimidines	Purines and purine derivatives	89.9	0	Metabolic pathways;Bile secretion;Purine metabolism;Microbial metabolism in diverse environments	Metabolic pathways;Bile secretion;Purine metabolism;Microbial metabolism in diverse environments	3.3758	3.3438	0.0001229	0.01342	5.2664	5.3713	5.1811	5.1477	5.3682	5.6843	5.8437	5.8254	5.9593	5.6261
neg_8719	1-METHYLXANTHINE	metab_16256	yes	C16358	neg	6136-37-4	165.041	2.42802	M-H	C6H6N4O2	33.8	0	HMDB0010738;PW_C006745	-	-	map01100;map01110;map01120;map00232	Metabolism;Metabolism;Metabolism;Metabolism	Global and overview maps;Global and overview maps;Global and overview maps;Biosynthesis of other secondary metabolites	Organoheterocyclic compounds	Imidazopyrimidines	Purines and purine derivatives	33.8	0	Metabolic pathways;Biosynthesis of secondary metabolites;Microbial metabolism in diverse environments;Caffeine metabolism	Metabolic pathways;Biosynthesis of secondary metabolites;Microbial metabolism in diverse environments;Caffeine metabolism	1.3585	1.3472	0.03971	0.2235	5.0516	4.969	5.0545	5.0294	5.0036	4.9859	4.8515	4.8573	4.7845	5.0319
neg_8874	8-Hydroxy-7-methylguanine	metab_16428	yes	-	neg	1688-85-3	180.052	2.25203	M-H	C6H7N5O2	0	38.9	HMDB0006037	-	-	-	-	-	Organoheterocyclic compounds	Imidazopyrimidines	Purines and purine derivatives	0	38.9	-	-	2.7043	2.6817	0.001961	0.04937	4.239	4.1582	4.2531	4.1199	4.0694	4.0248	3.8038	3.6959	3.604	3.883
neg_9251	7-Methyladenine	metab_16831	yes	C02241	neg	935-69-3	148.062	1.71512	M-H	C6H7N5	70.4	0	HMDB0011614	-	-	-	-	-	Organoheterocyclic compounds	Imidazopyrimidines	Purines and purine derivatives	70.4	0	-	-	1.1785	1.1734	0.0001989	0.01633	4.9379	4.95	4.943	4.9679	4.9594	5.0362	4.9868	5.0109	5.0213	5.0262
neg_9396	Hypoxanthine	metab_16978	yes	C00262	neg	68-94-0	135.03	1.23982	M-H	C5H4N4O	96.8	0	PW_C000102;HMDB0000157	-	-	map01100;map01232;map00230	Metabolism;Metabolism;Metabolism	Global and overview maps;Global and overview maps;Nucleotide metabolism	Organoheterocyclic compounds	Imidazopyrimidines	Purines and purine derivatives	96.8	0	Metabolic pathways;Nucleotide metabolism;Purine metabolism	Metabolic pathways;Nucleotide metabolism;Purine metabolism	2.0439	2.0232	0.002045	0.05045	6.4705	6.631	6.6179	6.6223	6.7257	6.7402	6.8331	6.8378	6.8748	6.8248
pos_1822	8-Cyclopentyl-3-(3-fluoro-propyl)-1-propyl-3,7-dihydro-purine-2,6-dione	metab_888	yes	-	pos	-	667.351	1.8675	2M+Na	C16H23FN4O2	0	32.8	HMDB0260333	-	-	-	-	-	Organoheterocyclic compounds	Imidazopyrimidines	Purines and purine derivatives	0	32.8	-	-	1.2476	1.2499	0.02938	0.2668	5.8951	5.9544	5.8428	5.8844	5.8677	6.0235	5.9065	5.9498	6.029	5.9396
pos_6163	1H-Purine-2,6-dione, 3,7-dihydro-1,3-dimethyl-7-(3-(methylphenylamino)propyl)-	metab_5539	yes	-	pos	-	655.341	2.53683	2M+H	C17H21N5O2	0	35.4	HMDB0244897	-	-	-	-	-	Organoheterocyclic compounds	Imidazopyrimidines	Purines and purine derivatives	0	35.4	-	-	1.3204	1.3219	0.002806	0.0806	6.7289	6.7083	6.7027	6.6623	6.6721	6.783	6.7624	6.7297	6.8057	6.7651
pos_7094	Xanthine	metab_6529	yes	C00385	pos	69-89-6	153.041	1.50273	M+H	C5H4N4O2	88.6	0	HMDB0000292;PW_C000198;MJDBOTE0000403	-	-	map01100;map01110;map00230;map01120;map00232;map01232;map01065;map01060	Metabolism;Metabolism;Metabolism;Metabolism;Metabolism;Metabolism;Metabolism;Metabolism	Global and overview maps;Global and overview maps;Nucleotide metabolism;Global and overview maps;Biosynthesis of other secondary metabolites;Global and overview maps;Chemical structure transformation maps;Chemical structure transformation maps	Organoheterocyclic compounds	Imidazopyrimidines	Purines and purine derivatives	88.6	0	Metabolic pathways;Biosynthesis of secondary metabolites;Purine metabolism;Microbial metabolism in diverse environments;Caffeine metabolism;Nucleotide metabolism;Biosynthesis of alkaloids derived from histidine and purine;Biosynthesis of plant secondary metabolites	Metabolic pathways;Biosynthesis of secondary metabolites;Purine metabolism;Microbial metabolism in diverse environments;Caffeine metabolism;Nucleotide metabolism;Biosynthesis of alkaloids derived from histidine and purine;Biosynthesis of plant secondary metabolites	4.0501	4.0311	0.0003794	0.02673	6.1551	6.4287	6.2498	6.0534	6.5723	6.7169	6.9794	6.9876	7.0411	6.9307
neg_2409	2-(1,2,3,4-Tetrahydroxybutyl)-6-(2,3,4-trihydroxybutyl)pyrazine	metab_9402	yes	-	neg	36806-15-2	667.27	2.57288	2M+Hac-H	C12H20N2O7	0	74.4	HMDB0034894	-	-	-	-	-	Organoheterocyclic compounds	Diazines	Pyrazines	0	74.4	-	-	1.4351	1.4212	0.0001584	0.0142	6.1129	6.1528	6.1749	6.1674	6.175	6.0497	6.0479	6.0488	6.0829	6.0808
pos_6303	Implitapide	metab_5692	yes	-	pos	-	496.276	2.34987	M+H-2H2O	C35H37N3O2	0	30.9	HMDB0259646	-	-	-	-	-	Organoheterocyclic compounds	Indoles and derivatives	Pyridoindoles	0	30.9	-	-	1.1375	1.1343	0.001166	0.04958	6.2033	6.237	6.2457	6.2413	6.2077	6.1871	6.1697	6.1851	6.1545	6.1757
pos_6801	2',3'-Dideoxy-3'-fluorouridine	metab_6215	yes	-	pos	-	213.069	1.85968	M+H-H2O	C9H11FN2O4	0	42.1	HMDB0245543	-	-	-	-	-	Nucleosides, nucleotides, and analogues	Pyrimidine nucleosides	Pyrimidine 2'',3''-dideoxyribonucleosides	0	42.1	-	-	2.1439	2.1321	0.004529	0.1035	5.2103	5.1802	5.0248	5.0268	5.1289	5.0079	4.9152	4.8586	4.9684	4.8263
neg_2598	Uridine, 2'-deoxy-2'-fluoro-2'-methyl-, (2'R)-	metab_9606	yes	-	neg	-	305.081	2.84632	M+FA-H	C10H13FN2O5	0	45.5	HMDB0247529	-	-	-	-	-	Nucleosides, nucleotides, and analogues	Pyrimidine nucleosides	Pyrimidine 2''-deoxyribonucleosides	0	45.5	-	-	1.2173	1.2065	0.000358	0.02278	5.3483	5.3609	5.3605	5.3277	5.3412	5.2738	5.2581	5.2573	5.2934	5.3082
neg_6216	Fosteabine	metab_13525	yes	C21596	neg	73532-83-9	574.325	5.516	M-H	C27H50N3O8P	0	47.8	HMDB0252470	-	-	-	-	-	Nucleosides, nucleotides, and analogues	Pyrimidine nucleotides	Pyrimidine ribonucleotides	0	47.8	-	-	1.9352	1.9266	0.001208	0.03831	5.0297	5.2282	5.0863	5.1677	5.113	4.9013	4.9293	4.9742	4.9127	4.9831
neg_2576	Carmofur	metab_9582	yes	C13252	neg	61422-45-5	559.237	2.81438	2M+FA-H	C11H16FN3O3	0	67.2	HMDB0249685	-	-	map00983	Metabolism	Xenobiotics biodegradation and metabolism	Organoheterocyclic compounds	Diazines	Pyrimidines and pyrimidine derivatives	0	67.2	Drug metabolism - other enzymes	Drug metabolism - other enzymes	1.0943	1.0927	0.001365	0.04017	5.365	5.3806	5.3823	5.3758	5.4143	5.3285	5.3374	5.3207	5.2902	5.3433
neg_5601	Fursultiamine	metab_12869	yes	-	neg	-	435.097	6.08675	M+K-2H	C17H26N4O3S2	0	40.1	HMDB0252549	-	-	-	-	-	Organoheterocyclic compounds	Diazines	Pyrimidines and pyrimidine derivatives	0	40.1	-	-	2.2655	2.2391	0.03842	0.2202	5.1734	5.0206	5.5228	5.5372	5.4084	4.9901	4.7859	5.2048	5.1847	4.8737
neg_7643	Hydroxy Desmethyl Bosentan	metab_15081	yes	-	neg	-	598.156	3.57782	M+FA-H	C26H27N5O7S	0	41.2	HMDB0253253	-	-	-	-	-	Organoheterocyclic compounds	Diazines	Pyrimidines and pyrimidine derivatives	0	41.2	-	-	1.0005	0.9985	0.04829	0.2463	5.0902	4.9617	4.9572	4.988	4.9802	4.8935	4.9604	4.9619	4.8882	4.9351
neg_9719	Uracil	metab_17302	yes	C00106	neg	66-22-8	111.019	0.656683	M-H	C4H4N2O2	68.2	0	HMDB0000300;PW_C000204;MJDBOTE0000838	Nucleic acids	Bases	map00240;map01100;map01232;map00770;map00410	Metabolism;Metabolism;Metabolism;Metabolism;Metabolism	Nucleotide metabolism;Global and overview maps;Global and overview maps;Metabolism of cofactors and vitamins;Metabolism of other amino acids	Organoheterocyclic compounds	Diazines	Pyrimidines and pyrimidine derivatives	68.2	0	Pyrimidine metabolism;Metabolic pathways;Nucleotide metabolism;Pantothenate and CoA biosynthesis;beta-Alanine metabolism	Pyrimidine metabolism;Metabolic pathways;Nucleotide metabolism;Pantothenate and CoA biosynthesis;beta-Alanine metabolism	1.4435	1.4301	0.003369	0.06584	6.0435	6.1237	6.0204	5.9993	6.0251	6.1137	6.1622	6.1434	6.197	6.1287
pos_254	Cytosine	metab_1657	yes	C00380	pos	71-30-7	112.051	0.599817	M+H, M+K, M+Na	C4H5N3O	57.9	0	HMDB0000630;MJDBOTE0000458	Nucleic acids	Bases	map00240;map01100;map01232	Metabolism;Metabolism;Metabolism	Nucleotide metabolism;Global and overview maps;Global and overview maps	Organoheterocyclic compounds	Diazines	Pyrimidines and pyrimidine derivatives	57.9	0	Pyrimidine metabolism;Metabolic pathways;Nucleotide metabolism	Pyrimidine metabolism;Metabolic pathways;Nucleotide metabolism	1.5528	1.5432	0.006072	0.122	5.6727	5.6677	5.6156	5.6079	5.5915	5.5762	5.5459	5.5299	5.536	5.4361
pos_319	Dihydrouracil	metab_2339	yes	C00429	pos	504-07-4	115.05	0.194067	M+H-H2O, M+H	C4H6N2O2	70.9	0	PW_C000053;HMDB0000076	-	-	map00240;map01100;map00770;map00410	Metabolism;Metabolism;Metabolism;Metabolism	Nucleotide metabolism;Global and overview maps;Metabolism of cofactors and vitamins;Metabolism of other amino acids	Organoheterocyclic compounds	Diazines	Pyrimidines and pyrimidine derivatives	70.9	0	Pyrimidine metabolism;Metabolic pathways;Pantothenate and CoA biosynthesis;beta-Alanine metabolism	Pyrimidine metabolism;Metabolic pathways;Pantothenate and CoA biosynthesis;beta-Alanine metabolism	1.0395	1.0313	0.02058	0.2281	6.0844	6.149	6.1601	6.1752	6.1895	6.2037	6.2085	6.2018	6.2119	6.1964
neg_6470	BATRACHOTOXIN	metab_13803	yes	C13750	neg	23509-16-2	573.271	5.16667	M+Cl	C31H42N2O6	0	31.4	HMDB0248882	-	-	-	-	-	Organoheterocyclic compounds	Pyrroles	Pyrrole carboxylic acids and derivatives	0	31.4	-	-	1.0767	1.0658	0.04917	0.2488	5.1933	5.0695	5.1196	5.1075	5.1269	5.0777	4.9592	5.1143	5.06	5.0202
pos_4812	1-Pyrrolidinyloxy, 3-(aminocarbonyl)-2,2,5,5-tetramethyl-	metab_4119	yes	-	pos	-	436.292	5.57413	2M+ACN+Na	C9H18N2O2	0	60.5	HMDB0255776	-	-	-	-	-	Organoheterocyclic compounds	Pyrrolidines	Pyrrolidine carboxylic acids and derivatives	0	60.5	-	-	1.01	1.0068	0.009776	0.1541	6.0488	6.0498	6.0288	6.0178	6.0653	6.0223	6.0056	5.9553	5.9943	5.9989
pos_820	N-Methylnicotinium	metab_7289	yes	-	pos	24554-05-0	219.174	5.66057	M+ACN+H, 2M+ACN+H	C11H17N2+	0	31.4	HMDB0001009	-	-	-	-	-	Organoheterocyclic compounds	Pyridines and derivatives	Pyrrolidinylpyridines	0	31.4	-	-	3.2018	3.2019	0.0107	0.1619	5.3168	5.3485	5.353	5.318	5.3305	5.9678	5.5244	5.4267	6.1877	5.9465
pos_5720	Queuine	metab_5064	yes	C01449	pos	72496-59-4	291.127	3.3015	2M+3H2O+2H	C12H15N5O3	0	38.1	HMDB0001495	-	-	-	-	-	Organoheterocyclic compounds	Pyrrolopyrimidines	Pyrrolo[2,3-d]pyrimidines	0	38.1	-	-	1.02	1.0163	0.01983	0.2244	6.0813	6.0783	6.0454	6.0044	6.0989	6.0063	6.0002	6.0003	6.0172	6.0288
pos_7310	METHACHOLINE	metab_6756	yes	C07471	pos	55-92-5	160.133	0.880333	M+H	C8H17NO2	45.2	0	HMDB0015654	-	-	-	-	-	Organic nitrogen compounds	Organonitrogen compounds	Quaternary ammonium salts	45.2	0	-	-	1.3976	1.3899	0.02572	0.2547	4.7779	4.7193	4.8886	4.7578	4.7838	4.7304	4.7386	4.6949	4.6254	4.646
pos_234	Retinyl propionate	metab_1441	yes	-	pos	-	307.242	5.77007	M+H-2H2O, M+H-H2O, M+H	C23H34O2	0	46.7	HMDB0257180	-	-	-	-	-	Lipids and lipid-like molecules	Prenol lipids	Retinoids	0	46.7	-	-	1.3326	1.3299	0.001844	0.06532	5.5432	5.5367	5.4968	5.4784	5.5163	5.4079	5.4491	5.4606	5.4234	5.4619
pos_2224	(1alpha,3beta,20S,22R,24S,25S)-Pubescenin	metab_1318	yes	-	pos	100217-93-4	684.366	2.45918	M+ACN+Na	C34H52O10	0	49	HMDB0030011	-	-	-	-	-	Lipids and lipid-like molecules	Prenol lipids	Sesquiterpenoids	0	49	-	-	1.5886	1.5869	0.01707	0.2058	5.8472	5.6953	5.6834	5.7228	5.7487	5.804	5.7846	5.8887	5.9039	5.9293
neg_4954	25-Acetylvulgaroside	metab_12168	yes	-	neg	172616-88-5	459.273	6.46495	M-H2O-H	C27H42O7	0	37	HMDB0041365	-	-	-	-	-	Lipids and lipid-like molecules	Prenol lipids	Sesterterpenoids	0	37	-	-	1.5667	1.5633	0.00225	0.05313	6.0309	6.0593	5.9566	6.0678	5.9609	6.1017	6.1592	6.1211	6.1261	6.1836
neg_1821	L-2-Hydroxyglutaric acid	metab_8774	yes	C03196	neg	13095-48-2	147.029	1.08007	M-H	C5H8O5	0	44.4	PW_C000546;HMDB0000694	-	-	map01100;map00310;map01120	Metabolism;Metabolism;Metabolism	Global and overview maps;Amino acid metabolism;Global and overview maps	Organic acids and derivatives	Hydroxy acids and derivatives	Short-chain hydroxy acids and derivatives	0	44.4	Metabolic pathways;Lysine degradation;Microbial metabolism in diverse environments	Metabolic pathways;Lysine degradation;Microbial metabolism in diverse environments	1.0869	1.0697	0.002713	0.05918	5.7176	5.6877	5.7112	5.7181	5.7063	5.6882	5.6378	5.6274	5.6691	5.623
neg_4820	Testosterone enanthate	metab_12027	yes	C08157	neg	315-37-7	445.296	5.96508	M+FA-H	C26H40O3	0	37.5	HMDB0005814;LMST02020075	-	-	-	-	-	Lipids and lipid-like molecules	Steroids and steroid derivatives	Steroid esters	0	37.5	-	-	1.6093	1.589	0.003626	0.06775	4.6168	4.6913	4.6625	4.6109	4.6402	4.6911	4.8442	4.7458	4.7642	4.8387
neg_4568	Bufogenin	metab_11760	yes	-	neg	-	421.176	5.63635	M+K-2H	C24H32O4	0	50.2	LMST01130031;HMDB0249430	-	-	-	-	-	Lipids and lipid-like molecules	Steroids and steroid derivatives	Steroid lactones	0	50.2	-	-	1.3732	1.3614	0.03267	0.2029	5.2907	5.2177	5.1904	5.1836	5.2604	5.0864	4.9842	5.2047	5.1964	5.078
neg_8300	Dihydroouabain	metab_15799	yes	-	neg	-	567.278	2.9354	M-H2O-H	C29H46O12	0	75.4	HMDB0251322	-	-	-	-	-	Lipids and lipid-like molecules	Steroids and steroid derivatives	Steroid lactones	0	75.4	-	-	1.3711	1.3682	0.001399	0.04068	5.545	5.6189	5.5839	5.5805	5.6206	5.4942	5.4804	5.513	5.456	5.5366
pos_2044	Acolongifloriside K	metab_1122	yes	C01443	pos	-	626.312	2.17822	M+ACN+H	C29H44O12	0	55.3	HMDB0247956;HMDB0031448	Steroids	23-Carbon atoms	map04976	Organismal Systems	Digestive system	Lipids and lipid-like molecules	Steroids and steroid derivatives	Steroid lactones	0	55.3	Bile secretion	Bile secretion	2.0757	2.0724	0.006506	0.1273	5.464	5.4856	5.5674	5.3999	5.6008	5.3128	5.405	5.3579	5.1754	5.3045
pos_5674	Foliandrin	metab_5023	yes	-	pos	-	618.369	3.44925	M+ACN+H	C32H48O9	0	74.8	HMDB0252427	-	-	-	-	-	Lipids and lipid-like molecules	Steroids and steroid derivatives	Steroid lactones	0	74.8	-	-	1.2724	1.2686	0.01571	0.2013	5.8255	5.7868	5.8447	5.7846	5.862	5.8653	5.9659	5.8793	5.922	5.8589
pos_6042	Corchorosol A	metab_5406	yes	-	pos	23838-13-3	269.155	2.70878	M+2H	C29H44O9	0	34	HMDB0041137	-	-	-	-	-	Lipids and lipid-like molecules	Steroids and steroid derivatives	Steroid lactones	0	34	-	-	5.5258	5.5184	7.736e-06	0.003641	5.1072	5.2548	5.0625	5.1311	5.2082	3.7079	3.9621	4.2967	4.2245	3.974
pos_6126	Canesceol	metab_5498	yes	-	pos	82228-15-7	586.318	2.58367	M+NH4	C29H44O11	0	47.1	HMDB0034084	-	-	-	-	-	Lipids and lipid-like molecules	Steroids and steroid derivatives	Steroid lactones	0	47.1	-	-	1.1802	1.1798	0.01341	0.1843	5.977	5.896	5.8969	5.8877	5.928	5.9798	5.9939	5.9348	6.0072	6.0008
neg_2753	Veratrine	metab_9778	yes	-	neg	-	628.295	3.04768	M+K-2H	C32H49NO9	0	64.8	HMDB0259783	-	-	-	-	-	Lipids and lipid-like molecules	Steroids and steroid derivatives	Steroidal alkaloids	0	64.8	-	-	1.3364	1.323	0.0005729	0.02748	5.6969	5.713	5.7068	5.7298	5.6955	5.5982	5.5936	5.6119	5.6555	5.6591
neg_6472	Cholic acid glucuronide	metab_13805	yes	-	neg	76060-22-5	621.27	5.15915	M+K-2H	C30H48O11	0	47.5	HMDB0002577;LMST05010044	-	-	-	-	-	Lipids and lipid-like molecules	Steroids and steroid derivatives	Steroidal glycosides	0	47.5	-	-	2.5097	2.4914	5.591e-07	0.0008802	5.1826	5.1823	5.1566	5.1928	5.2452	4.8954	4.8974	4.9176	4.9215	4.9635
neg_8784	Estriol-17-glucuronide	metab_16328	yes	C11346	neg	7219-89-8	509.2	2.32402	M+FA-H	C24H32O9	0	70.1	HMDB0010333	-	-	-	-	-	Lipids and lipid-like molecules	Steroids and steroid derivatives	Steroidal glycosides	0	70.1	-	-	1.3814	1.3889	0.004944	0.07925	5.0952	5.0903	5.1046	5.0074	5.0823	4.9841	5.0008	5.0286	4.9268	4.9306
neg_6646	Isbogrel	metab_13997	yes	-	neg	-	302.118	4.78812	M+Na-2H	C18H19NO2	0	49.6	HMDB0253595	-	-	-	-	-	Benzenoids	Benzene and substituted derivatives	Styrenes	0	49.6	-	-	1.7742	1.7625	0.001463	0.04193	5.5427	5.4444	5.4697	5.4711	5.5358	5.2931	5.2604	5.4065	5.3564	5.3677
pos_5868	Flobetair	metab_5217	yes	-	pos	-	743.355	2.96622	2M+Na	C20H25FN2O3	0	65.5	HMDB0252306	-	-	-	-	-	Benzenoids	Benzene and substituted derivatives	Styrenes	0	65.5	-	-	1.3584	1.3526	0.01806	0.2142	5.8953	5.9437	5.8862	5.9965	6.0051	6.0984	6.0281	5.9932	6.0207	6.0336
pos_481	Styrene	metab_7516	yes	C07083	pos	100-42-5	105.07	2.1004	M+H, M+NH4	C8H8	72.1	0	HMDB0034240	-	-	map01100;map01220;map01120;map00642;map00643	Metabolism;Metabolism;Metabolism;Metabolism;Metabolism	Global and overview maps;Global and overview maps;Global and overview maps;Xenobiotics biodegradation and metabolism;Xenobiotics biodegradation and metabolism	Benzenoids	Benzene and substituted derivatives	Styrenes	72.1	0	Metabolic pathways;Degradation of aromatic compounds;Microbial metabolism in diverse environments;Ethylbenzene degradation;Styrene degradation	Metabolic pathways;Degradation of aromatic compounds;Microbial metabolism in diverse environments;Ethylbenzene degradation;Styrene degradation	2.0839	2.0844	0.0001519	0.01636	6.6067	6.5975	6.5816	6.5236	6.6004	6.8085	6.702	6.7627	6.7638	6.7082
neg_6191	Ethinyl estradiol sulfate	metab_13498	yes	-	neg	-	397.111	5.53997	M+Na-2H	C20H24O5S	0	49.7	HMDB0252017	-	-	-	-	-	Lipids and lipid-like molecules	Steroids and steroid derivatives	Sulfated steroids	0	49.7	-	-	1.0212	1.0085	0.04028	0.2251	4.7519	4.7402	4.835	4.8211	4.7974	4.697	4.6589	4.7663	4.7577	4.7318
neg_3482	Sertraline	metab_10579	yes	C07246	neg	79617-96-2	326.048	3.92518	M+Na-2H	C17H17Cl2N	0	33.2	HMDB0258197;HMDB0005010	-	-	-	-	-	Benzenoids	Tetralins	Tametralines	0	33.2	-	-	1.6646	1.6507	0.005064	0.08037	5.1044	5.0031	5.0388	5.0109	5.073	4.8323	4.8072	4.9429	4.964	4.9531
neg_3419	Loganoside	metab_10509	yes	-	neg	-	389.146	3.85717	M-H	C17H26O10	0	31.8	HMDB0247827	-	-	-	-	-	Lipids and lipid-like molecules	Prenol lipids	Terpene glycosides	0	31.8	-	-	1.2084	1.2134	0.02969	0.1929	4.6317	4.6499	4.5792	4.5731	4.6322	4.5474	4.5783	4.5153	4.4008	4.5598
neg_529	Cinncassiol D2 glucoside	metab_12530	yes	-	neg	-	529.262	2.7419	M-H2O-H, M-H	C26H42O11	0	39.3	HMDB0034679	-	-	-	-	-	Lipids and lipid-like molecules	Prenol lipids	Terpene glycosides	0	39.3	-	-	1.0135	1.0099	0.01377	0.1285	5.6039	5.6034	5.5939	5.6571	5.6709	5.5746	5.5584	5.5919	5.5323	5.5769
pos_1579	(1R,4Ar,5S,7R)-7-methyl-1-[(2R,3S,4R,5R,6S)-3,4,5-trihydroxy-6-(hydroxymethyl)oxan-2-yl]oxy-1,5,6,7a-tetrahydrocyclopenta[c]pyran-4a,5,7-triol	metab_629	yes	-	pos	-	403.098	1.16162	M+K	C15H24O10	0	30.3	HMDB0242331	-	-	-	-	-	Lipids and lipid-like molecules	Prenol lipids	Terpene glycosides	0	30.3	-	-	1.361	1.3561	0.03106	0.2722	5.39	5.4537	5.4872	5.4258	5.4674	5.4246	5.2978	5.3488	5.2574	5.416
pos_2549	Steviobioside	metab_1667	yes	-	pos	41093-60-1	684.355	3.12997	M+ACN+H	C32H50O13	0	40.8	HMDB0036707	-	-	-	-	-	Lipids and lipid-like molecules	Prenol lipids	Terpene glycosides	0	40.8	-	-	1.8225	1.8285	0.04753	0.314	5.7972	5.38	5.452	5.4158	5.4918	5.6391	5.6384	5.7747	5.7334	5.6801
pos_2570	(1R*,2R*,4R*,8S*)-p-Menthane-1,2,8,9-tetrol 9-glucoside	metab_1690	yes	-	pos	402593-84-4	384.222	3.20035	M+NH4	C16H30O9	0	43.6	HMDB0039976	-	-	-	-	-	Lipids and lipid-like molecules	Prenol lipids	Terpene glycosides	0	43.6	-	-	1.2851	1.2931	0.04175	0.314	5.2709	5.3376	5.2381	5.2841	5.3161	5.0796	5.2181	5.2782	5.2304	5.1869
pos_4271	Soyasaponin II	metab_3527	yes	C12081	pos	55319-36-3	877.499	6.49562	M+H-2H2O	C47H76O17	0	59.1	HMDB0034650	-	-	-	-	-	Lipids and lipid-like molecules	Prenol lipids	Terpene glycosides	0	59.1	-	-	1.7234	1.7331	0.02846	0.2652	5.719	5.6072	5.7945	5.5683	5.5802	5.8476	5.7523	5.8694	5.8849	5.6893
pos_5912	Assamsaponin F	metab_5267	yes	-	pos	316157-15-0	652.298	2.91938	M+2H	C62H94O29	0	81.8	HMDB0036480	-	-	-	-	-	Lipids and lipid-like molecules	Prenol lipids	Terpene glycosides	0	81.8	-	-	1.4846	1.4843	0.001163	0.04958	6.4312	6.3851	6.3713	6.378	6.3606	6.4696	6.4562	6.5274	6.4726	6.4506
pos_6242	Phaseoloside A	metab_5624	yes	C08967	pos	-	702.324	2.42798	M+H+Na	C65H104O31	0	39.3	HMDB0303708	-	-	-	-	-	Lipids and lipid-like molecules	Prenol lipids	Terpene glycosides	0	39.3	-	-	2.1521	2.1347	0.0493	0.314	4.6833	4.6268	4.7822	4.8303	4.3455	4.5708	4.2553	4.277	4.5652	4.3256
pos_6648	Medicagenic acid 3-O-b-D-glucuronide	metab_6054	yes	-	pos	84161-90-0	351.182	1.92968	M+H+Na	C36H54O12	0	36.8	HMDB0034693	-	-	-	-	-	Lipids and lipid-like molecules	Prenol lipids	Terpene glycosides	0	36.8	-	-	1.0564	1.0558	0.003639	0.09158	6.1629	6.1295	6.1306	6.1564	6.1161	6.195	6.1935	6.1693	6.2095	6.1689
neg_8096	Dehydroandrographolide succinate	metab_15576	yes	-	neg	-	577.226	3.12012	M+FA-H	C28H36O10	0	88	HMDB0250944	-	-	-	-	-	Lipids and lipid-like molecules	Prenol lipids	Terpene lactones	0	88	-	-	1.0861	1.076	0.001013	0.03547	5.2938	5.2667	5.2505	5.23	5.2481	5.3235	5.3248	5.3061	5.3116	5.3091
pos_6173	8beta-Angeloyloxy-15-hydroxy-1alpha,10R-dimethoxy-3-oxo-11(13)-germacren-12,6alpha-olide	metab_5550	yes	-	pos	-	457.24	2.52915	M+CH3OH+H	C22H32O8	0	40.6	HMDB0039013	-	-	-	-	-	Lipids and lipid-like molecules	Prenol lipids	Terpene lactones	0	40.6	-	-	1.5657	1.571	0.04528	0.314	5.0594	4.9977	4.9813	5.0759	5.1689	4.8731	4.9931	4.8367	4.8325	5.0673
neg_6392	3-trans-p-Coumaroylrotundic acid	metab_13716	yes	-	neg	144624-03-3	615.372	5.28432	M-H2O-H	C39H54O7	0	74	HMDB0040667	-	-	-	-	-	Lipids and lipid-like molecules	Prenol lipids	Triterpenoids	0	74	-	-	1.6401	1.6351	0.0199	0.1555	4.9759	5.1153	4.9547	5.085	4.9834	5.3239	5.1828	5.1568	5.2112	5.0438
pos_6875	Triterpenoid	metab_6295	yes	C06085	pos	-	288.155	1.7661	M+H+Na	C30H48O7S	0	49.3	HMDB0004309	-	-	-	-	-	Lipids and lipid-like molecules	Prenol lipids	Triterpenoids	0	49.3	-	-	1.2162	1.2132	0.0002235	0.02055	5.9769	5.9516	5.9766	5.998	5.992	5.9277	5.9114	5.9341	5.9161	5.9204
neg_7760	O-Demethylmetoprolol	metab_15208	yes	-	neg	-	290.115	3.46582	M+K-2H	C14H23NO3	0	30.9	HMDB0255850	-	-	-	-	-	Benzenoids	Phenols	Tyrosols and derivatives	0	30.9	-	-	1.0322	1.0314	0.006174	0.08677	4.5081	4.5144	4.5529	4.5115	4.5271	4.4453	4.4658	4.4803	4.4291	4.5055
neg_6672	Allyl-isopropyl-acetylharnstoff	metab_14026	yes	-	neg	-	427.256	4.74817	2M+Hac-H	C9H16N2O2	0	40.1	HMDB0258084	-	-	-	-	-	Organic acids and derivatives	Organic carbonic acids and derivatives	Ureas	0	40.1	-	-	1.0281	1.0119	0.005539	0.08339	5.2658	5.292	5.2448	5.2305	5.2515	5.3318	5.3169	5.3338	5.2792	5.2992
pos_1519	Ureidopropionic acid	metab_564	yes	C02642	pos	462-88-4	115.05	0.9427	M+H-H2O	C4H8N2O3	0	33.9	PW_C000018;HMDB0000026	-	-	map00240;map01100;map00770;map00410	Metabolism;Metabolism;Metabolism;Metabolism	Nucleotide metabolism;Global and overview maps;Metabolism of cofactors and vitamins;Metabolism of other amino acids	Organic acids and derivatives	Organic carbonic acids and derivatives	Ureas	0	33.9	Pyrimidine metabolism;Metabolic pathways;Pantothenate and CoA biosynthesis;beta-Alanine metabolism	Pyrimidine metabolism;Metabolic pathways;Pantothenate and CoA biosynthesis;beta-Alanine metabolism	1.083	1.0787	0.002103	0.0692	6.8305	6.8145	6.8291	6.8239	6.8384	6.7982	6.7787	6.7897	6.7396	6.7861
neg_4199	Chymostatin	metab_11356	yes	C11308	neg	9076-44-2	642.278	5.17465	M+Cl	C31H41N7O6	0	74.3	HMDB0242696	-	-	-	-	-	Lipids and lipid-like molecules	Steroids and steroid derivatives	Vitamin D and derivatives	0	74.3	-	-	2.2102	2.1979	0.004408	0.07556	4.4552	4.4046	4.292	4.513	4.5471	4.7146	4.5506	4.7951	4.7973	4.6354
