# Supplementary material for: The microbiome- and metabolome-modulating activity of dietary cholesterol: insights from the small and large intestines
Source: Royal Society of Chemistry journal article supplement (doi:10.1039/d4fo03049d), 2025-01-01
Supplement: d4fo03049d4.xlsx [file d4fo03049d4.xlsx]

## Sheet: Supplementary Table S4
Table S4. Metabolites Significantly Altered in eSI_0 and eLI_0 Groups Based on Metabolomics
ID	Metabolite	Metab ID	P_value	FDR	VIP_pred_OPLS-DA	VIP_PLS-DA	FC(eLI_0/eSI_0)	Log2FC(eLI_0/eSI_0)	Significant	KEGG Compound ID	KEGG Compound First Category	KEGG Compound Second Category	KEGG Pathway ID	KEGG Pathway Description	KEGG Pathway First Category	KEGG Pathway Second Category	Library ID	HMDB Superclass	HMDB Class	HMDB Subclass	CAS ID	M/Z	Retention time	Adducts	Formula	Fragmentation Score	Theoretical Fragmentation Score	Mode
pos_5891	Etelcalcetide	metab_5243	6.13e-10	1.57e-08	3.719	3.7157	0.2	-2.3217	yes	-	-	-	-	-	-	-	HMDB0251992	Organic acids and derivatives	Carboxylic acids and derivatives	Amino acids, peptides, and analogues	-	524.774	2.94282	M+2H	C38H73N21O10S2	0	50.7	pos
pos_6126	Canesceol	metab_5498	5.3e-07	3.65e-06	3.6163	3.6148	0.2172	-2.2031	yes	-	-	-	-	-	-	-	HMDB0034084	Lipids and lipid-like molecules	Steroids and steroid derivatives	Steroid lactones	82228-15-7	586.318	2.58367	M+NH4	C29H44O11	0	47.1	pos
pos_5954	Glycyl-proline-1-naphthylamide	metab_5309	1.52e-15	1.09e-12	3.4879	3.4848	0.2866	-1.8029	yes	-	-	-	-	-	-	-	HMDB0252835	Organic acids and derivatives	Carboxylic acids and derivatives	Amino acids, peptides, and analogues	-	612.334	2.84918	2M+NH4	C17H19N3O2	0	58.1	pos
neg_1828	Gamma-Glutamylarginine	metab_8780	8.33e-12	5.02e-10	3.355	3.3442	0.0205	-5.6104	yes	-	-	-	-	-	-	-	HMDB0029143	Organic acids and derivatives	Carboxylic acids and derivatives	Amino acids, peptides, and analogues	31106-03-3	284.136	1.11225	M-H2O-H	C11H21N5O5	0	53.9	neg
pos_397	N,N,O-Tridesmethylvenlafaxine	metab_3197	3.16e-05	0.0001151	3.0824	3.0781	0.4062	-1.2997	yes	-	-	-	-	-	-	-	PW_C040613;HMDB0061345	Organic oxygen compounds	Organooxygen compounds	Alcohols and polyols	149289-29-2	258.145	0.623083	M+H-2H2O, M+Na	C14H21NO2	0	37.5	pos
neg_1611	Lacto-N-biose I	metab_8554	2.71e-18	9.1e-15	2.9871	2.9773	0.4126	-1.2771	yes	C06372	Carbohydrates	Oligosaccharides	-	-	-	-	HMDB0006575;HMDB0252594	Organic oxygen compounds	Organooxygen compounds	Carbohydrates and carbohydrate conjugates	50787-09-2	418.112	0.616867	M+Cl	C14H25NO11	0	47	neg
neg_7546	PS(5-iso PGF2VI/15:0)	metab_14976	0.000241	0.000588	2.937	2.9442	3.7301	1.8992	yes	-	-	-	-	-	-	-	HMDB0281051	Not Available	Not Available	Not Available	-	828.411	3.66633	M+K-2H	C39H70NO13P	0	59.2	neg
pos_1288	Glabrin C	metab_316	1.81e-05	7.19e-05	2.8431	2.8405	0.4829	-1.0501	yes	-	-	-	-	-	-	-	HMDB0033612	Organic acids and derivatives	Carboxylic acids and derivatives	Amino acids, peptides, and analogues	-	429.232	1.89077	M+2Na+H, M+2Na	C41H64N8O9	0	87.3	pos
neg_5985	Taurocholic acid 3-sulfate	metab_13278	4.04e-07	2.73e-06	2.8194	2.8078	0.3723	-1.4254	yes	-	-	-	-	-	-	-	LMST05020031;HMDB0002581	Lipids and lipid-like molecules	Steroids and steroid derivatives	Steroidal glycosides	67030-62-0	296.617	5.66032	M-2H	C26H45NO10S2	0	59.7	neg
neg_6600	Prednisone	metab_13947	3.67e-06	1.71e-05	2.8162	2.81	0.402	-1.3148	yes	C07370	-	-	-	-	-	-	PW_C009120;LMST02030180;HMDB0014773;MJDBOTE0001633	Lipids and lipid-like molecules	Steroids and steroid derivatives	Hydroxysteroids	1953-03-02	393.145	4.87533	M+Cl	C21H26O5	0	59.9	neg
neg_4047	Bmn-673 8R,9S	metab_11190	5.92e-06	2.53e-05	2.8055	2.7944	0.2873	-1.7996	yes	-	-	-	-	-	-	-	HMDB0244463	Organoheterocyclic compounds	Quinolines and derivatives	Phenylquinolines	-	425.117	4.81178	M+FA-H	C19H14F2N6O	0	58.9	neg
pos_5760	Val Trp	metab_5107	3.7e-08	4.27e-07	2.7836	2.7819	0.4942	-1.0167	yes	-	-	-	-	-	-	-	-	-	-	-	-	304.165	3.19252	M+H	C16H21N3O3	76.9	0	pos
neg_7403	Norerythromycin	metab_14820	8.03e-08	7.46e-07	2.7623	2.7499	0.5077	-0.9778	yes	-	-	-	-	-	-	-	HMDB0061026	Lipids and lipid-like molecules	Steroids and steroid derivatives	Estrane steroids	-	740.395	3.83302	M+Cl	C35H63NO13	0	58	neg
pos_2271	Pro Phe	metab_1367	6.35e-09	1.04e-07	2.7526	2.751	0.6031	-0.7294	yes	-	-	-	-	-	-	-	-	-	-	-	-	263.139	2.56812	M+H	C14H18N2O3	59.7	0	pos
neg_4187	Arginylphenylalanine	metab_11343	1.45e-05	5.33e-05	2.7119	2.7099	0.3624	-1.4642	yes	-	-	-	-	-	-	-	HMDB0028716	Organic acids and derivatives	Carboxylic acids and derivatives	Amino acids, peptides, and analogues	2047-13-4	641.351	5.14457	2M-H	C15H23N5O3	0	81	neg
pos_1165	Gly Leu Arg	metab_180	9.3e-14	1.73e-11	2.6747	2.6722	0.5744	-0.7998	yes	-	-	-	-	-	-	-	-	-	-	-	-	345.224	1.67255	M+2H, M+H	C14H28N6O4	70.7	0	pos
pos_6123	CDP-DG(20:1(11Z)/20:5(5Z,8Z,11Z,14Z,16E)-OH(18R))	metab_5495	2.35e-07	1.89e-06	2.662	2.6592	0.6088	-0.7159	yes	-	-	-	-	-	-	-	HMDB0291759	Not Available	Not Available	Not Available	-	546.769	2.59143	M+H+Na	C52H85N3O16P2	0	67.1	pos
pos_2401	Pyropheophorbide a	metab_1510	3.32e-05	0.0001199	2.624	2.6236	0.5464	-0.872	yes	C18064	-	-	map01110;map00860	Biosynthesis of secondary metabolites;Porphyrin metabolism	Metabolism;Metabolism	Global and overview maps;Metabolism of cofactors and vitamins	HMDB0256993	Not Available	Not Available	Not Available	-	576.3	2.82572	M+ACN+H	C33H34N4O3	0	66.9	pos
pos_1821	Trans-Zeatin-O-glucoside riboside	metab_887	0.000138	0.0004106	2.6226	2.624	1.9382	0.9547	yes	-	-	-	-	-	-	-	HMDB0032880	Benzenoids	Naphthalenes	Naphthalene sulfonic acids and derivatives	62512-97-4	555.24	1.8675	M+ACN+H	C21H31N5O10	0	34.9	pos
pos_1491	Prolylhydroxyproline	metab_535	1.56e-05	6.33e-05	2.6124	2.612	0.5975	-0.7431	yes	-	-	-	-	-	-	-	HMDB0256781;HMDB0006695	Organic acids and derivatives	Carboxylic acids and derivatives	Amino acids, peptides, and analogues	18684-24-7	229.118	0.8491	M+H	C10H16N2O4	61.5	0	pos
pos_2127	Paroxetine	metab_1212	2.37e-14	8.1e-12	2.6061	2.604	1.8143	0.8594	yes	C07415	-	-	-	-	-	-	HMDB0014853	Organoheterocyclic compounds	Piperidines	Phenylpiperidines	61869-08-7	330.148	2.31075	M+H	C19H20FNO3	53.7	0	pos
pos_1652	1-Methyladenine	metab_705	8.7e-16	1.04e-12	2.6049	2.6028	0.6091	-0.7152	yes	C02216	-	-	-	-	-	-	HMDB0011599	Organoheterocyclic compounds	Imidazopyrimidines	Purines and purine derivatives	5142-22-3	150.077	1.58717	M+H	C6H7N5	0	47.4	pos
pos_6233	Esculeoside A	metab_5615	3.38e-06	1.72e-05	2.6003	2.5984	0.6058	-0.7232	yes	-	-	-	-	-	-	-	HMDB0251947	Lipids and lipid-like molecules	Steroids and steroid derivatives	Steroidal glycosides	-	635.803	2.4358	M+2H	C58H95NO29	0	90.5	pos
neg_2996	Bremelanotide	metab_10045	3.44e-16	3.36e-13	2.5719	2.5631	0.5011	-0.9968	yes	-	-	-	-	-	-	-	HMDB0249376	Organic acids and derivatives	Carboxylic acids and derivatives	Amino acids, peptides, and analogues	-	1005.5	3.31262	M-H2O-H	C50H68N14O10	0	89.8	neg
neg_4423	Tanabalin	metab_11604	5.2e-07	3.35e-06	2.5709	2.5607	0.4729	-1.0803	yes	C20205	-	-	-	-	-	-	HMDB0041330	Lipids and lipid-like molecules	Prenol lipids	Terpene lactones	179094-52-1;172548-61-7	407.161	5.516	M+Cl	C22H28O5	0	36.9	neg
pos_5942	Isofebrifugine	metab_5296	5.74e-07	3.88e-06	2.5479	2.5459	0.6344	-0.6566	yes	C10698	-	-	-	-	-	-	HMDB0242253;HMDB0253633	Organoheterocyclic compounds	Diazanaphthalenes	Benzodiazines	32434-44-9	644.324	2.86475	2M+ACN+H	C16H19N3O3	0	54.6	pos
pos_6116	7-Oxociguatoxin	metab_5488	5.32e-09	8.97e-08	2.5477	2.5463	0.6853	-0.5453	yes	-	-	-	-	-	-	-	HMDB0039389	Phenylpropanoids and polyketides	Ciguatera toxins	Not Available	263336-55-6	575.28	2.59925	M+H+Na	C60H86O20	0	83.6	pos
pos_7105	Fluocinolone	metab_6541	1.25e-05	5.21e-05	2.5448	2.5417	0.5844	-0.7751	yes	C07006	-	-	-	-	-	-	HMDB0252347	Lipids and lipid-like molecules	Steroids and steroid derivatives	Hydroxysteroids	807-38-5	445.203	1.39532	M+CH3OH+H	C21H26F2O6	0	45.1	pos
neg_3364	Gibberellin A51-catabolite	metab_10448	0.0001845	0.0004668	2.5399	2.5299	0.384	-1.3809	yes	C11854	-	-	map01110;map00904	Biosynthesis of secondary metabolites;Diterpenoid biosynthesis	Metabolism;Metabolism	Global and overview maps;Metabolism of terpenoids and polyketides	HMDB0304363;LMPR0104170011	Lipids and lipid-like molecules	Prenol lipids	Diterpenoids	-	365.113	3.76898	M+Cl	C19H22O5	0	37.1	neg
pos_6189	Ent-6R,16bOH,17-Trihydroxy-7-oxo-6,7-seco-19,6-kauranolide 6-O-glucoside	metab_5565	5.81e-07	3.91e-06	2.4862	2.4844	0.6498	-0.6219	yes	-	-	-	-	-	-	-	HMDB0038546	Lipids and lipid-like molecules	Prenol lipids	Terpene glycosides	132242-50-3	592.272	2.48227	M+ACN+Na	C26H40O11	0	68.8	pos
pos_5912	Assamsaponin F	metab_5267	1.42e-15	1.09e-12	2.4858	2.4837	0.6639	-0.591	yes	-	-	-	-	-	-	-	HMDB0036480	Lipids and lipid-like molecules	Prenol lipids	Terpene glycosides	316157-15-0	652.298	2.91938	M+2H	C62H94O29	0	81.8	pos
pos_313	L-Lysine	metab_2275	1.35e-12	1.35e-10	2.4817	2.4795	0.6688	-0.5803	yes	C00047	Peptides	Amino acids	map01100;map00310;map00997;map00300;map01120;map01210;map00780;map00470;map01230;map04974;map01110;map02010;map00970;map00960;map01064;map01060	Metabolic pathways;Lysine degradation;Biosynthesis of various other secondary metabolites;Lysine biosynthesis;Microbial metabolism in diverse environments;2-Oxocarboxylic acid metabolism;Biotin metabolism;D-Amino acid metabolism;Biosynthesis of amino acids;Protein digestion and absorption;Biosynthesis of secondary metabolites;ABC transporters;Aminoacyl-tRNA biosynthesis;Tropane, piperidine and py…	Metabolism;Metabolism;Metabolism;Metabolism;Metabolism;Metabolism;Metabolism;Metabolism;Metabolism;Organismal Systems;Metabolism;Environmental Information Processing;Genetic Information Processing;Metabolism;Metabolism;Metabolism	Global and overview maps;Amino acid metabolism;Biosynthesis of other secondary metabolites;Amino acid metabolism;Global and overview maps;Global and overview maps;Metabolism of cofactors and vitamins;Metabolism of other amino acids;Global and overview maps;Digestive system;Global and overview maps;Membrane transport;Translation;Biosynthesis of other secondary metabolites;Chemical structure transf…	PW_C000118;HMDB0000182;HMDB0301757;MJDBOTE0000528	Organic acids and derivatives	Carboxylic acids and derivatives	Amino acids, peptides, and analogues	56-87-1;10098-89-2	147.113	0.467433	M+H-H2O, M+H	C6H14N2O2	89.5	0	pos
pos_2065	Bezitramide	metab_1144	1.04e-05	4.46e-05	2.4786	2.477	0.6418	-0.6397	yes	-	-	-	-	-	-	-	HMDB0249171	Benzenoids	Benzene and substituted derivatives	Diphenylacetonitriles	-	506.259	2.2094	2M+3H2O+2H	C31H32N4O2	0	55.7	pos
neg_7509	Nummularine A	metab_14935	0.0002258	0.0005553	2.474	2.476	0.4625	-1.1123	yes	C10011	-	-	-	-	-	-	HMDB0029336	Organic acids and derivatives	Carboxylic acids and derivatives	Amino acids, peptides, and analogues	53947-95-8	682.341	3.713	M+Cl	C36H49N5O6	0	52.4	neg
pos_7074	S-(2-Methylbutanoyl)-dihydrolipoamide	metab_6510	9.47e-09	1.42e-07	2.4589	2.4576	0.62	-0.6896	yes	C05118	-	-	-	-	-	-	PW_C002980;HMDB0006869	Lipids and lipid-like molecules	Fatty Acyls	Fatty acyl thioesters	-	274.13	1.61812	M+H-H2O	C13H25NO2S2	0	48.7	pos
pos_6012	Floratheasaponin F	metab_5373	4.24e-05	0.0001479	2.456	2.4542	1.5746	0.655	yes	-	-	-	-	-	-	-	HMDB0302064	Lipids and lipid-like molecules	Prenol lipids	Terpene glycosides	-	667.309	2.74773	M+2Na	C63H100O27	0	58.5	pos
pos_625	Penitrem B	metab_5632	1.2e-10	4.37e-09	2.4548	2.4526	0.6732	-0.571	yes	C20731	-	-	-	-	-	-	HMDB0242736;HMDB0256239	Organoheterocyclic compounds	Naphthopyrans	Not Available	11076-67-8	584.339	1.98375	M+2H, M+H	C37H45NO5	0	45.8	pos
neg_2154	4-Hydroxyphenylacetic acid sulfate	metab_9122	9.71e-10	2.24e-08	2.4369	2.4265	1.8	0.848	yes	-	-	-	-	-	-	-	HMDB0304906	Benzenoids	Phenols	1-hydroxy-2-unsubstituted benzenoids	-	266.975	2.16367	M+Cl	C8H8O6S	0	32.3	neg
pos_1785	6-Dimethylaminopurine	metab_846	1.04e-07	9.7e-07	2.4362	2.4349	0.6303	-0.6659	yes	-	-	-	-	-	-	-	HMDB0000473	Organoheterocyclic compounds	Imidazopyrimidines	Purines and purine derivatives	938-55-6	164.093	1.8051	M+H	C7H9N5	54.1	0	pos
neg_2178	1-Methyluric acid	metab_9148	1.48e-12	1.26e-10	2.4335	2.4241	1.981	0.9863	yes	C16359	-	-	map00232	Caffeine metabolism	Metabolism	Biosynthesis of other secondary metabolites	HMDB0003099;PW_C001777	Organoheterocyclic compounds	Imidazopyrimidines	Purines and purine derivatives	708-79-2	181.036	2.24407	M-H	C6H6N4O3	70.3	0	neg
pos_5798	Gly Val Ile	metab_5143	1.57e-12	1.42e-10	2.4293	2.427	0.6504	-0.6206	yes	-	-	-	-	-	-	-	-	-	-	-	-	288.191	3.1143	M+H	C13H25N3O4	42.3	0	pos
pos_1109	Delta-Valerolactone	metab_120	2.3e-11	1.29e-09	2.4281	2.4267	1.3813	0.466	yes	C02240	-	-	-	-	-	-	HMDB0250981	Organoheterocyclic compounds	Lactones	Delta valerolactones	542-28-9	101.06	0.623083	M+H-H2O, M+H	C5H8O2	0	46.8	pos
pos_2018	Lotusine	metab_1094	5.61e-10	1.47e-08	2.4222	2.4208	0.6213	-0.6866	yes	C17567	-	-	-	-	-	-	HMDB0033347	Organoheterocyclic compounds	Isoquinolines and derivatives	Benzylisoquinolines	6871-67-6	315.181	2.13158	M+H	C19H24NO3+	0	44.6	pos
pos_2479	PA(18:4(6Z,9Z,12Z,15Z)/14:1(9Z))	metab_1594	2.83e-09	5.38e-08	2.399	2.3967	0.6877	-0.5401	yes	C00416	Lipids	Phospholipids	map01100;map00564;map01110;map00561;map05212;map05200;map04975;map04024;map05231;map04072;map04912;map04070;map04666	Metabolic pathways;Glycerophospholipid metabolism;Biosynthesis of secondary metabolites;Glycerolipid metabolism;Pancreatic cancer;Pathways in cancer;Fat digestion and absorption;cAMP signaling pathway;Choline metabolism in cancer;Phospholipase D signaling pathway;GnRH signaling pathway;Phosphatidylinositol signaling system;Fc gamma R-mediated phagocytosis	Metabolism;Metabolism;Metabolism;Metabolism;Human Diseases;Human Diseases;Organismal Systems;Environmental Information Processing;Human Diseases;Environmental Information Processing;Organismal Systems;Environmental Information Processing;Organismal Systems	Global and overview maps;Lipid metabolism;Global and overview maps;Lipid metabolism;Cancer: specific types;Cancer: overview;Digestive system;Signal transduction;Cancer: overview;Signal transduction;Endocrine system;Signal transduction;Immune system	HMDB0115028;PW_C062446;LMGP10010426	Lipids and lipid-like molecules	Glycerophospholipids	Glycerophosphates	-	683.371	2.96622	M+2Na-H	C35H59O8P	0	55.3	pos
pos_7091	4-(Glutamylamino) butanoate	metab_6526	3.32e-14	9.57e-12	2.3826	2.3805	0.6624	-0.5941	yes	C15767	-	-	map01100;map00330	Metabolic pathways;Arginine and proline metabolism	Metabolism;Metabolism	Global and overview maps;Amino acid metabolism	HMDB0012161	Organic acids and derivatives	Carboxylic acids and derivatives	Amino acids, peptides, and analogues	5105-96-4	233.113	1.52592	M+H	C9H16N2O5	0	64	pos
pos_5962	N-hydroxy-L-tryptophan	metab_5318	7.19e-05	0.0002332	2.3803	2.3761	0.6301	-0.6664	yes	C19716	-	-	-	-	-	-	HMDB0255152	Organoheterocyclic compounds	Indoles and derivatives	Indolyl carboxylic acids and derivatives	-	262.118	2.83355	M+ACN+H	C11H12N2O3	0	60.2	pos
pos_5872	Pro Trp	metab_5222	0.0001759	0.000507	2.378	2.3794	0.604	-0.7275	yes	-	-	-	-	-	-	-	-	-	-	-	-	302.149	2.96622	M+H	C16H19N3O3	50.2	0	pos
neg_4096	Cyclo(D-trp-D-asp-pro-D-val-leu)	metab_11243	3.33e-06	1.58e-05	2.3692	2.3654	1.9341	0.9516	yes	-	-	-	-	-	-	-	HMDB0249361	Organic acids and derivatives	Carboxylic acids and derivatives	Amino acids, peptides, and analogues	-	655.31	4.91668	M+FA-H	C31H42N6O7	0	57.2	neg
pos_6390	Gly Val Val	metab_5786	2.05e-09	4.09e-08	2.3632	2.3608	0.6944	-0.5262	yes	-	-	-	-	-	-	-	-	-	-	-	-	274.176	2.24833	M+H	C12H23N3O4	84.7	0	pos
pos_5868	Flobetair	metab_5217	0.000343	0.0009132	2.3572	2.3578	0.6399	-0.6442	yes	-	-	-	-	-	-	-	HMDB0252306	Benzenoids	Benzene and substituted derivatives	Styrenes	-	743.355	2.96622	2M+Na	C20H25FN2O3	0	65.5	pos
neg_7273	Arg-His-Phe-Trp-Gln-Gln	metab_14677	6.45e-16	4.84e-13	2.3545	2.3464	0.6143	-0.7031	yes	-	-	-	-	-	-	-	HMDB0248576	Organic acids and derivatives	Carboxylic acids and derivatives	Amino acids, peptides, and analogues	-	945.432	3.97313	M+FA-H	C42H56N14O9	0	93.1	neg
neg_9300	5,5-Dimethylbarbituric acid	metab_16884	1.27e-07	1.07e-06	2.3537	2.3413	1.8192	0.8633	yes	-	-	-	-	-	-	-	-	-	-	-	-	155.045	1.56413	M-H	C6H8N2O3	47	0	neg
neg_7040	PC(2:0/5-iso PGF2VI)	metab_14425	0.005908	0.009859	2.3479	2.3365	0.4432	-1.1741	yes	-	-	-	-	-	-	-	HMDB0288846	Not Available	Not Available	Not Available	-	588.289	4.22905	M-H2O-H	C28H50NO11P	0	68.4	neg
neg_6725	Corynantheine	metab_14085	0.0009827	0.002016	2.3469	2.3498	0.4219	-1.245	yes	C17872	-	-	-	-	-	-	HMDB0250477	Alkaloids and derivatives	Corynanthean-type alkaloids	Not Available	-	387.171	4.65048	M+Na-2H	C22H26N2O3	0	35.5	neg
neg_6299	CDP-DG(22:5(7Z,10Z,13Z,16Z,19Z)/PGJ2)	metab_13615	1.38e-07	1.14e-06	2.3433	2.3365	1.8481	0.886	yes	-	-	-	-	-	-	-	HMDB0292563	Not Available	Not Available	Not Available	-	551.75	5.4309	M-2H	C54H81N3O17P2	0	37.7	neg
pos_1689	Lys Ile Glu	metab_742	8.32e-10	1.97e-08	2.3362	2.3338	0.6744	-0.5684	yes	-	-	-	-	-	-	-	-	-	-	-	-	389.239	1.69602	M+H	C17H32N4O6	65	0	pos
pos_6106	28-Glucosylarjunolate 3-[rhamnosyl-(1->3)-glucuronide]	metab_5477	1.9e-06	1.05e-05	2.3258	2.3237	0.6882	-0.539	yes	-	-	-	-	-	-	-	HMDB0033580	Lipids and lipid-like molecules	Prenol lipids	Terpene glycosides	214840-33-2	498.242	2.61487	M+H+Na	C48H76O20	0	46.4	pos
pos_6084	CDP-DG(18:2(9Z,11Z)/i-19:0)	metab_5452	0.0001035	0.0003185	2.3136	2.3129	0.6818	-0.5526	yes	C00269	-	-	map01100;map00564;map01110;map04070	Metabolic pathways;Glycerophospholipid metabolism;Biosynthesis of secondary metabolites;Phosphatidylinositol signaling system	Metabolism;Metabolism;Metabolism;Environmental Information Processing	Global and overview maps;Lipid metabolism;Global and overview maps;Signal transduction	PW_C076395;HMDB0116059	Lipids and lipid-like molecules	Glycerophospholipids	CDP-glycerols	-	532.772	2.64618	M+2Na	C49H87N3O15P2	0	60.9	pos
neg_8056	PGP(i-12:0/PGF1alpha)	metab_15532	3.95e-13	4.71e-11	2.3057	2.2977	0.6111	-0.7105	yes	-	-	-	-	-	-	-	HMDB0274881	Not Available	Not Available	Not Available	-	881.401	3.1601	M+Cl	C38H72O16P2	0	61.7	neg
neg_9251	7-Methyladenine	metab_16831	7.19e-10	1.78e-08	2.2973	2.2913	0.5327	-0.9086	yes	C02241	-	-	-	-	-	-	HMDB0011614	Organoheterocyclic compounds	Imidazopyrimidines	Purines and purine derivatives	935-69-3	148.062	1.71512	M-H	C6H7N5	70.4	0	neg
neg_9396	Hypoxanthine	metab_16978	1.72e-09	3.51e-08	2.2869	2.2799	0.6528	-0.6153	yes	C00262	-	-	map01100;map01232;map00230	Metabolic pathways;Nucleotide metabolism;Purine metabolism	Metabolism;Metabolism;Metabolism	Global and overview maps;Global and overview maps;Nucleotide metabolism	PW_C000102;HMDB0000157	Organoheterocyclic compounds	Imidazopyrimidines	Purines and purine derivatives	68-94-0	135.03	1.23982	M-H	C5H4N4O	96.8	0	neg
neg_8549	Pro-leu	metab_16071	2.64e-08	3.02e-07	2.2818	2.2776	0.5643	-0.8254	yes	-	-	-	-	-	-	-	HMDB0253028	Organic acids and derivatives	Carboxylic acids and derivatives	Amino acids, peptides, and analogues	-	227.14	2.6375	M-H	C11H20N2O3	0	30.3	neg
neg_8930	8-hydroxy Guanosine	metab_16490	2.97e-14	7.07e-12	2.2719	2.2648	0.5271	-0.9238	yes	-	-	-	-	-	-	-	-	-	-	-	-	298.079	2.17167	M-H	C10H13N5O6	34.6	0	neg
pos_3512	Sclareol	metab_2694	1.85e-10	6.15e-09	2.2663	2.2643	1.5525	0.6346	yes	C09183	-	-	map01110;map00904	Biosynthesis of secondary metabolites;Diterpenoid biosynthesis	Metabolism;Metabolism	Global and overview maps;Metabolism of terpenoids and polyketides	LMPR0104030010;HMDB0036827;MJDBOTE0001479	Lipids and lipid-like molecules	Prenol lipids	Diterpenoids	515-03-7	341.305	5.95947	M+CH3OH+H	C20H36O2	0	41.3	pos
neg_7495	Asimilobine	metab_14919	8.44e-11	3.38e-09	2.265	2.258	0.5332	-0.9072	yes	-	-	-	-	-	-	-	HMDB0302145	Alkaloids and derivatives	Aporphines	Not Available	-	288.102	3.73698	M+Na-2H	C17H17NO2	0	41.7	neg
pos_2417	Kinetin	metab_1527	1.21e-07	1.09e-06	2.2608	2.2596	0.6822	-0.5517	yes	C08272	-	-	-	-	-	-	HMDB0012245;MJDBZSJ0000125	Organoheterocyclic compounds	Imidazopyrimidines	Purines and purine derivatives	525-79-1	216.088	2.86475	M+H	C10H9N5O	83	0	pos
pos_7437	Gly Pro Lys	metab_6884	2.35e-08	2.98e-07	2.2494	2.2473	0.6999	-0.5147	yes	-	-	-	-	-	-	-	-	-	-	-	-	301.187	0.623083	M+H	C13H24N4O4	71.9	0	pos
neg_3103	Natamycin	metab_10164	5.54e-06	2.4e-05	2.2481	2.2441	0.5851	-0.7733	yes	C08073	-	-	map01052	Type I polyketide structures	Metabolism	Metabolism of terpenoids and polyketides	HMDB0242755;HMDB0014964;MJDBOTE0001394	Organic oxygen compounds	Organooxygen compounds	Carbonyl compounds	7681-93-8	646.285	3.44982	M-H2O-H	C33H47NO13	0	84.3	neg
pos_1734	Melanostatin	metab_792	9.82e-06	4.26e-05	2.243	2.2403	0.7015	-0.5115	yes	-	-	-	-	-	-	-	HMDB0005764;HMDB0254713	Organic acids and derivatives	Carboxylic acids and derivatives	Amino acids, peptides, and analogues	9083-38-9	317.218	1.75058	M+CH3OH+H	C13H24N4O3	0	40.9	pos
neg_6778	Ile Glu Val Asp Leu	metab_14141	2.75e-10	8.03e-09	2.2422	2.2325	0.536	-0.8998	yes	-	-	-	-	-	-	-	-	-	-	-	-	586.309	4.56542	M-H	C26H45N5O10	49.7	0	neg
pos_7311	Hydroxyprolyl-Lysine	metab_6757	1.45e-07	1.27e-06	2.2415	2.2406	0.6879	-0.5398	yes	-	-	-	-	-	-	-	HMDB0028868	Organic acids and derivatives	Carboxylic acids and derivatives	Amino acids, peptides, and analogues	-	301.187	0.880333	M+ACN+H	C11H21N3O4	0	38.8	pos
pos_132	Trans-Cinnamic acid	metab_7517	6.66e-13	7.35e-11	2.2358	2.2339	0.7948	-0.3312	yes	C00423	-	-	map01100;map01220;map00996;map01110;map01120;map00130;map00999;map00940;map00360;map01070;map01060	Metabolic pathways;Degradation of aromatic compounds;Biosynthesis of various alkaloids;Biosynthesis of secondary metabolites;Microbial metabolism in diverse environments;Ubiquinone and other terpenoid-quinone biosynthesis;Biosynthesis of various plant secondary metabolites;Phenylpropanoid biosynthesis;Phenylalanine metabolism;Biosynthesis of plant hormones;Biosynthesis of plant secondary metaboli…	Metabolism;Metabolism;Metabolism;Metabolism;Metabolism;Metabolism;Metabolism;Metabolism;Metabolism;Metabolism;Metabolism	Global and overview maps;Global and overview maps;Biosynthesis of other secondary metabolites;Global and overview maps;Global and overview maps;Metabolism of cofactors and vitamins;Biosynthesis of other secondary metabolites;Biosynthesis of other secondary metabolites;Amino acid metabolism;Chemical structure transformation maps;Chemical structure transformation maps	HMDB0000567;HMDB0000930	Phenylpropanoids and polyketides	Cinnamic acids and derivatives	Cinnamic acids	140-10-3;102-94-3	166.086	1.93727	M+H-H2O, M+NH4, M+H	C9H8O2	0	56.7	pos
pos_6182	Strophanthin	metab_5560	1.96e-10	6.37e-09	2.2325	2.2311	0.6933	-0.5285	yes	-	-	-	-	-	-	-	HMDB0242744	Lipids and lipid-like molecules	Steroids and steroid derivatives	Steroid lactones	-	711.364	2.50575	M+H	C36H54O14	0	60.5	pos
neg_9074	Adenosine 3'-monophosphate	metab_16643	4.72e-07	3.1e-06	2.2283	2.2189	0.6239	-0.6806	yes	C01367	-	-	map01100;map00230	Metabolic pathways;Purine metabolism	Metabolism;Metabolism	Global and overview maps;Nucleotide metabolism	HMDB0003540	Nucleosides, nucleotides, and analogues	Ribonucleoside 3''-phosphates	Not Available	84-21-9	346.056	1.88347	M-H	C10H14N5O7P	86.6	0	neg
neg_7850	Capsidiol	metab_15307	1.78e-05	6.38e-05	2.2279	2.2084	1.8792	0.9101	yes	C09627	-	-	map00909	Sesquiterpenoid and triterpenoid biosynthesis	Metabolism	Metabolism of terpenoids and polyketides	HMDB0002352;LMPR0103250002	Lipids and lipid-like molecules	Prenol lipids	Sesquiterpenoids	37208-05-2	257.151	3.3692	M+Na-2H	C15H24O2	0	34.8	neg
neg_6607	Mesaconitine	metab_13954	0.0003256	0.0007634	2.2208	2.2235	0.5364	-0.8987	yes	C08698	-	-	-	-	-	-	HMDB0254473	Lipids and lipid-like molecules	Prenol lipids	Diterpenoids	2752-64-9	676.295	4.86122	M+FA-H	C33H45NO11	0	54.8	neg
pos_2309	PIP(6 keto-PGF1alpha/18:1(11Z))	metab_1407	2.88e-06	1.5e-05	2.2195	2.2183	0.7189	-0.4762	yes	-	-	-	-	-	-	-	HMDB0278859	Not Available	Not Available	Not Available	-	516.262	2.6305	M+2H	C47H84O20P2	0	65.1	pos
pos_2253	4,4'-Thiobis(6-tert-butyl-m-cresol)	metab_1347	2.32e-08	2.95e-07	2.2191	2.217	0.7219	-0.4701	yes	-	-	-	-	-	-	-	HMDB0247683	Organosulfur compounds	Thioethers	Aryl thioethers	-	755.356	2.52915	2M+K	C22H30O2S	0	54	pos
pos_6242	Phaseoloside A	metab_5624	3.93e-08	4.49e-07	2.2189	2.2168	1.3709	0.4551	yes	C08967	-	-	-	-	-	-	HMDB0303708	Lipids and lipid-like molecules	Prenol lipids	Terpene glycosides	-	702.324	2.42798	M+H+Na	C65H104O31	0	39.3	pos
pos_2103	Capsianoside V	metab_1186	3.69e-11	1.83e-09	2.2158	2.2138	0.7459	-0.423	yes	-	-	-	-	-	-	-	HMDB0030737	Lipids and lipid-like molecules	Prenol lipids	Terpene glycosides	121924-06-9	556.308	2.2718	M+ACN+H	C26H42O10	0	44.2	pos
neg_6183	Sar-Arg-Val-Tyr-Val-His-Pro-Ala	metab_13489	0.0003034	0.0007171	2.2055	2.205	0.5787	-0.7892	yes	-	-	-	-	-	-	-	HMDB0257488	Organic acids and derivatives	Carboxylic acids and derivatives	Amino acids, peptides, and analogues	-	956.494	5.53997	M+FA-H	C42H65N13O10	0	82.7	neg
neg_4526	4-Hydroxy-3-(3-methyl-2-butenyl)acetophenone	metab_11716	3.21e-07	2.28e-06	2.2027	2.1987	0.6428	-0.6376	yes	C10702	-	-	-	-	-	-	HMDB0030770	Organic oxygen compounds	Organooxygen compounds	Carbonyl compounds	26932-05-8	611.341	5.59585	3M-H	C13H16O2	0	53.7	neg
neg_9981	Taurine	metab_17576	8.66e-08	7.86e-07	2.1976	2.1887	0.5237	-0.9333	yes	C00245	-	-	map01100;map00920;map00430;map02010;map00120;map04080	Metabolic pathways;Sulfur metabolism;Taurine and hypotaurine metabolism;ABC transporters;Primary bile acid biosynthesis;Neuroactive ligand-receptor interaction	Metabolism;Metabolism;Metabolism;Environmental Information Processing;Metabolism;Environmental Information Processing	Global and overview maps;Energy metabolism;Metabolism of other amino acids;Membrane transport;Lipid metabolism;Signaling molecules and interaction	HMDB0000251;PW_C000171;MJDBOTE0000787	Organic acids and derivatives	Organic sulfonic acids and derivatives	Organosulfonic acids and derivatives	107-35-7	124.006	0.552333	M-H	C2H7NO3S	42.5	0	neg
pos_5911	Physagulin G	metab_5266	3.03e-07	2.33e-06	2.1975	2.1953	0.7411	-0.4322	yes	-	-	-	-	-	-	-	HMDB0039694	Lipids and lipid-like molecules	Steroids and steroid derivatives	Steroid lactones	148076-22-6	705.319	2.91938	M+H-H2O	C36H50O15	0	78	pos
pos_6637	Retinyl ester	metab_6043	7.74e-08	7.64e-07	2.1922	2.1906	0.7053	-0.5037	yes	C02075	-	-	map01100;map00830;map04977	Metabolic pathways;Retinol metabolism;Vitamin digestion and absorption	Metabolism;Metabolism;Organismal Systems	Global and overview maps;Metabolism of cofactors and vitamins;Digestive system	PW_C001935;HMDB0003598	Lipids and lipid-like molecules	Prenol lipids	Retinoids	-	163.112	1.93727	M+H+Na	C20H30O2	0	43.4	pos
pos_454	N,N-Didesmethyltramadol	metab_3820	4.91e-10	1.33e-08	2.1887	2.1871	0.7187	-0.4765	yes	-	-	-	-	-	-	-	PW_C040584;HMDB0060849	Benzenoids	Phenol ethers	Anisoles	931115-27-4	258.144	0.856883	M+H-2H2O, M+Na	C14H21NO2	0	50.6	pos
neg_4105	N-[2-Ethoxy-2-(4-methoxyphenyl)ethyl]cinnamide	metab_11254	1.68e-09	3.46e-08	2.1873	2.1817	0.6072	-0.7197	yes	-	-	-	-	-	-	-	HMDB0039633	Phenylpropanoids and polyketides	Cinnamic acids and derivatives	Cinnamic acid amides	70546-94-0	709.353	4.94365	2M+Hac-H	C20H23NO3	0	35.3	neg
pos_6632	Atosiban	metab_6038	3.95e-06	1.96e-05	2.1854	2.185	1.3849	0.4698	yes	-	-	-	-	-	-	-	HMDB0248705	Organic acids and derivatives	Carboxylic acids and derivatives	Amino acids, peptides, and analogues	-	497.732	1.93727	M+2H	C43H67N11O12S2	0	87.4	pos
neg_9452	N-Acetylmuramate	metab_17038	9.2e-09	1.31e-07	2.1805	2.1739	0.6671	-0.584	yes	C02713	Carbohydrates	Monosaccharides	map01100;map00520;map02060;map01250	Metabolic pathways;Amino sugar and nucleotide sugar metabolism;Phosphotransferase system (PTS);Biosynthesis of nucleotide sugars	Metabolism;Metabolism;Environmental Information Processing;Metabolism	Global and overview maps;Carbohydrate metabolism;Membrane transport;Global and overview maps	HMDB0060493	Organic oxygen compounds	Organooxygen compounds	Carbohydrates and carbohydrate conjugates	61633-75-8	292.104	1.08007	M-H	C11H19NO8	34.8	0	neg
pos_1387	Palustrine	metab_425	1.82e-12	1.61e-10	2.1779	2.1758	0.6385	-0.6472	yes	C10608	-	-	-	-	-	-	HMDB0256095	Phenylpropanoids and polyketides	Macrolactams	Not Available	22324-44-3	166.618	0.444033	M+H+Na	C17H31N3O2	0	33.1	pos
pos_3282	17-AAG	metab_2442	2.03e-14	7.29e-12	2.1768	2.1752	0.7086	-0.4969	yes	-	-	-	-	-	-	-	HMDB0244762	Phenylpropanoids and polyketides	Macrolactams	Not Available	-	550.287	5.51142	M+H-2H2O	C31H43N3O8	0	83.4	pos
pos_5933	Phenylacetylglutamine	metab_7513	1.53e-12	1.42e-10	2.1748	2.1729	0.6916	-0.532	yes	C04148	-	-	map00360	Phenylalanine metabolism	Metabolism	Amino acid metabolism	HMDB0006344;HMDB0062645;PW_C002728;MJDBOTE0000584	Organic acids and derivatives	Carboxylic acids and derivatives	Amino acids, peptides, and analogues	28047-15-6	306.144	2.88032	M+ACN+H	C13H16N2O4	0	51.6	pos
pos_2165	Thymidine	metab_1253	1.05e-05	4.5e-05	2.1743	2.1734	0.6972	-0.5204	yes	C00214	Nucleic acids	Nucleosides	map00240;map01100;map01232	Pyrimidine metabolism;Metabolic pathways;Nucleotide metabolism	Metabolism;Metabolism;Metabolism	Nucleotide metabolism;Global and overview maps;Global and overview maps	HMDB0000273;PW_C000187;MJDBOTE0000448	Nucleosides, nucleotides, and analogues	Pyrimidine nucleosides	Pyrimidine 2''-deoxyribonucleosides	50-89-5	260.124	2.38105	M+NH4	C10H14N2O5	0	61.3	pos
pos_2088	4-Aminobutyraldehyde	metab_7490	6.25e-06	2.88e-05	2.1703	2.1694	0.6604	-0.5986	yes	C00555	-	-	map01100;map00330;map00410	Metabolic pathways;Arginine and proline metabolism;beta-Alanine metabolism	Metabolism;Metabolism;Metabolism	Global and overview maps;Amino acid metabolism;Metabolism of other amino acids	HMDB0001080	Organic oxygen compounds	Organooxygen compounds	Carbonyl compounds	4390-05-0	129.102	2.25615	M+ACN+H	C4H9NO	0	34.2	pos
neg_2898	PGP(22:6(5Z,8E,10Z,13Z,15E,19Z)-2OH(7S, 17S)/20:2(11Z,14Z))	metab_9936	4.33e-15	1.92e-12	2.1689	2.1615	0.6443	-0.6341	yes	-	-	-	-	-	-	-	HMDB0273400	Not Available	Not Available	Not Available	-	993.465	3.20812	M+Cl	C48H80O15P2	0	33.5	neg
neg_6488	Dehydrodolichol diphosphate	metab_17603	3.12e-06	1.5e-05	2.1686	2.1597	0.6088	-0.716	yes	C17435	-	-	-	-	-	-	HMDB0060469	Lipids and lipid-like molecules	Prenol lipids	Polyprenols	-	499.241	5.1245	M-H2O-H	C25H44O7P2	0	66.9	neg
neg_7412	DIPROTIN B	metab_14830	1.39e-09	2.99e-08	2.166	2.1589	0.5827	-0.7792	yes	-	-	-	-	-	-	-	-	-	-	-	-	326.208	3.82502	M-H	C16H29N3O4	35.1	0	neg
neg_7149	Diethylenetriamine crosslinked with epichlorohydrin	metab_14541	7.7e-06	3.14e-05	2.1558	2.1505	0.6131	-0.7057	yes	-	-	-	-	-	-	-	HMDB0032216	Benzenoids	Benzene and substituted derivatives	Phenylbutylamines	25085-17-0	569.294	4.10903	2M+Hac-H	C14H22ClNO	0	47.5	neg
pos_7436	Glycylprolylarginine	metab_6883	5.04e-09	8.62e-08	2.1512	2.1497	0.7447	-0.4252	yes	-	-	-	-	-	-	-	HMDB0252828	Organic acids and derivatives	Carboxylic acids and derivatives	Amino acids, peptides, and analogues	-	329.193	0.623083	M+H	C13H24N6O4	0	78.2	pos
neg_8753	Bursin	metab_16294	2.3e-08	2.7e-07	2.1512	2.1434	0.6156	-0.6998	yes	-	-	-	-	-	-	-	HMDB0249447	Organic acids and derivatives	Carboxylic acids and derivatives	Amino acids, peptides, and analogues	-	360.178	2.37202	M+Na-2H	C14H25N7O3	0	41.2	neg
pos_1485	(-)-Slaframine	metab_528	5.81e-11	2.57e-09	2.1491	2.1474	1.4681	0.554	yes	C06185	-	-	map01110;map00960;map01064	Biosynthesis of secondary metabolites;Tropane, piperidine and pyridine alkaloid biosynthesis;Biosynthesis of alkaloids derived from ornithine, lysine and nicotinic acid	Metabolism;Metabolism;Metabolism	Global and overview maps;Biosynthesis of other secondary metabolites;Chemical structure transformation maps	HMDB0243523	Organoheterocyclic compounds	Indolizidines	Not Available	20084-93-9	216.17	0.8022	M+NH4	C10H18N2O2	0	47.9	pos
pos_7683	Pipecolic Acid	metab_7150	9.14e-14	1.73e-11	2.145	2.1432	0.7342	-0.4458	yes	C00408	-	-	map01100;map00310;map01110;map00960;map01064;map01060	Metabolic pathways;Lysine degradation;Biosynthesis of secondary metabolites;Tropane, piperidine and pyridine alkaloid biosynthesis;Biosynthesis of alkaloids derived from ornithine, lysine and nicotinic acid;Biosynthesis of plant secondary metabolites	Metabolism;Metabolism;Metabolism;Metabolism;Metabolism;Metabolism	Global and overview maps;Amino acid metabolism;Global and overview maps;Biosynthesis of other secondary metabolites;Chemical structure transformation maps;Chemical structure transformation maps	HMDB0000716;HMDB0000070;MJDBOTE0000664	Organic acids and derivatives	Carboxylic acids and derivatives	Amino acids, peptides, and analogues	3105-95-1;535-75-1	130.086	0.467433	M+H	C6H11NO2	85.7	0	pos
neg_4568	Bufogenin	metab_11760	5.52e-13	6.12e-11	2.1437	2.1361	0.6158	-0.6995	yes	-	-	-	-	-	-	-	LMST01130031;HMDB0249430	Lipids and lipid-like molecules	Steroids and steroid derivatives	Steroid lactones	-	421.176	5.63635	M+K-2H	C24H32O4	0	50.2	neg
pos_2468	Caffeoylferuloylspermidine	metab_1582	7.51e-05	0.0002421	2.1428	2.1402	1.4527	0.5387	yes	-	-	-	-	-	-	-	HMDB0033470	Phenylpropanoids and polyketides	Cinnamic acids and derivatives	Hydroxycinnamic acids and derivatives	114916-07-3	506.224	2.95065	M+Na	C26H33N3O6	0	52.1	pos
neg_7892	Latrunculin B	metab_15351	3.29e-11	1.54e-09	2.1355	2.1284	0.6869	-0.5418	yes	C19904	-	-	-	-	-	-	HMDB0253990	Phenylpropanoids and polyketides	Macrolides and analogues	Not Available	76343-94-7	789.343	3.32062	2M-H	C20H29NO5S	0	73.6	neg
pos_2371	1,6-anhydro-N-acetyl-beta-muramate	metab_1476	9.6e-12	6.31e-10	2.1345	2.1326	0.7045	-0.5054	yes	C19769	-	-	map01100;map00520;map01250	Metabolic pathways;Amino sugar and nucleotide sugar metabolism;Biosynthesis of nucleotide sugars	Metabolism;Metabolism;Metabolism	Global and overview maps;Carbohydrate metabolism;Global and overview maps	HMDB0304012	Organoheterocyclic compounds	Oxepanes	Not Available	-	292.129	2.7712	M+NH4	C11H16NO7-	0	36.1	pos
pos_2466	Ser Leu Ile	metab_1580	1.29e-11	7.9e-10	2.1279	2.1257	0.7179	-0.4781	yes	-	-	-	-	-	-	-	-	-	-	-	-	332.217	2.95065	M+H	C15H29N3O5	60.6	0	pos
neg_6420	Stercobilinogen	metab_13748	9.85e-08	8.69e-07	2.1279	2.1194	0.6376	-0.6492	yes	C05789	-	-	map00860	Porphyrin metabolism	Metabolism	Metabolism of cofactors and vitamins	HMDB0004157	Organoheterocyclic compounds	Tetrapyrroles and derivatives	Bilirubins	17095-63-5	641.352	5.23832	M+FA-H	C33H48N4O6	0	82.5	neg
neg_4155	Oxypinnatanine	metab_11309	2.23e-07	1.68e-06	2.1236	2.1146	0.5973	-0.7436	yes	-	-	-	-	-	-	-	HMDB0029403	Organic acids and derivatives	Carboxylic acids and derivatives	Amino acids, peptides, and analogues	52329-55-2	281.073	5.0716	M+Na-2H	C10H16N2O6	0	32.1	neg
pos_2473	Thr Val Phe Asp	metab_1588	4.29e-09	7.48e-08	2.1179	2.1161	0.723	-0.4679	yes	-	-	-	-	-	-	-	-	-	-	-	-	481.228	2.95848	M+H	C22H32N4O8	41.2	0	pos
pos_6281	Actein	metab_5667	0.0009468	0.00223	2.1125	2.1082	1.4902	0.5755	yes	-	-	-	-	-	-	-	HMDB0247977	Lipids and lipid-like molecules	Steroids and steroid derivatives	Cycloartanols and derivatives	-	350.192	2.38105	M+H+Na	C37H56O11	0	71.6	pos
pos_1660	Monopropionylcadaverine	metab_713	2.4e-07	1.93e-06	2.1119	2.1091	1.4164	0.5022	yes	-	-	-	-	-	-	-	HMDB0254871	Organic acids and derivatives	Carboxylic acids and derivatives	Carboxylic acid derivatives	-	159.149	1.63368	M+H	C8H18N2O	0	44.2	pos
pos_2663	Cyclosquamosin G	metab_1789	1.52e-15	1.09e-12	2.109	2.1072	0.7503	-0.4145	yes	-	-	-	-	-	-	-	HMDB0303372	Organic acids and derivatives	Carboxylic acids and derivatives	Amino acids, peptides, and analogues	-	846.419	3.60453	2M+3H2O+2H	C39H60N8O10S	0	60	pos
pos_6388	PG(18:1(12Z)-2OH(9,10)/i-13:0)	metab_5783	6.48e-05	0.000214	2.1084	2.1091	0.7123	-0.4895	yes	-	-	-	-	-	-	-	HMDB0271208	Not Available	Not Available	Not Available	-	392.221	2.24833	M+2Na	C37H71O12P	0	42.9	pos
neg_7002	(R)-1-O-[b-D-Glucopyranosyl-(1->6)-b-D-glucopyranoside]-1,3-octanediol	metab_14384	4.74e-08	4.81e-07	2.0988	2.0908	0.6443	-0.6341	yes	-	-	-	-	-	-	-	HMDB0032799	Lipids and lipid-like molecules	Fatty Acyls	Fatty acyl glycosides	-	491.215	4.27705	M+Na-2H	C20H38O12	0	63.9	neg
pos_2521	Tyrosyl-Phenylalanine	metab_1639	3.8e-10	1.07e-08	2.0971	2.0949	1.357	0.4404	yes	-	-	-	-	-	-	-	HMDB0029112	Organic acids and derivatives	Carboxylic acids and derivatives	Amino acids, peptides, and analogues	-	674.313	3.07533	2M+NH4	C18H20N2O4	0	31.3	pos
pos_2398	Janthitrem E	metab_1505	2.51e-09	4.9e-08	2.0968	2.0951	0.7676	-0.3815	yes	-	-	-	-	-	-	-	HMDB0030529	Organoheterocyclic compounds	Naphthopyrans	Not Available	90986-50-8	626.35	2.81802	M+Na	C37H49NO6	0	67.9	pos
neg_3588	(-)-trans-Carveol glucoside	metab_10694	1.11e-07	9.55e-07	2.0963	2.0892	0.6027	-0.7305	yes	-	-	-	-	-	-	-	HMDB0029848	Lipids and lipid-like molecules	Prenol lipids	Terpene glycosides	113349-30-7	349.14	4.07703	M+Cl	C16H26O6	0	35.1	neg
pos_250	Lysylproline	metab_1617	2.32e-09	4.59e-08	2.0948	2.0928	0.7613	-0.3935	yes	-	-	-	-	-	-	-	HMDB0028959	Organic acids and derivatives	Carboxylic acids and derivatives	Amino acids, peptides, and analogues	52766-27-5	244.165	0.599817	M+Na, M+K, M+H	C11H21N3O3	0	48.6	pos
pos_2565	N-Formyl-met-leu-phe-lys	metab_1685	0.0003941	0.001029	2.0944	2.0897	1.3758	0.4603	yes	-	-	-	-	-	-	-	HMDB0252432	Organic acids and derivatives	Carboxylic acids and derivatives	Amino acids, peptides, and analogues	-	530.281	3.1847	M+H-2H2O	C27H43N5O6S	0	70.2	pos
pos_1829	CDP-DG(22:6(5Z,8E,10Z,13Z,15E,19Z)-2OH(7S, 17S)/20:2(11Z,14Z))	metab_895	3.51e-07	2.61e-06	2.0912	2.0915	1.3294	0.4107	yes	-	-	-	-	-	-	-	HMDB0291872	Not Available	Not Available	Not Available	-	577.756	1.88298	M+2Na	C54H85N3O17P2	0	62.3	pos
neg_6330	Auda	metab_13650	7.34e-12	4.54e-10	2.088	2.08	0.6605	-0.5983	yes	-	-	-	-	-	-	-	HMDB0248721	Lipids and lipid-like molecules	Fatty Acyls	Fatty acids and conjugates	-	413.277	5.38715	M+Na-2H	C23H40N2O3	0	30.6	neg
pos_398	N2-gamma-Glutamylglutamine	metab_3207	3.59e-05	0.0001281	2.0822	2.0829	0.7201	-0.4737	yes	C05283	-	-	-	-	-	-	HMDB0011738	Organic acids and derivatives	Carboxylic acids and derivatives	Amino acids, peptides, and analogues	10148-81-9	276.119	0.623083	M+H, M+K	C10H17N3O6	0	58.2	pos
neg_7197	Beta-Funaltrexamine	metab_14592	1.19e-07	1.01e-06	2.0662	2.0558	0.6427	-0.6378	yes	C18127	-	-	-	-	-	-	HMDB0249128	Benzenoids	Phenanthrenes and derivatives	Not Available	72782-05-9	435.188	4.06103	M-H2O-H	C25H30N2O6	0	53.5	neg
pos_4818	Opiorphin	metab_4125	1.55e-05	6.29e-05	2.0651	2.064	0.7242	-0.4656	yes	-	-	-	-	-	-	-	HMDB0059792	Organic acids and derivatives	Carboxylic acids and derivatives	Amino acids, peptides, and analogues	-	734.408	5.55063	M+ACN+H	C29H48N12O8	0	66.8	pos
neg_3013	Seryltryptophan	metab_10066	2.6e-13	3.48e-11	2.0571	2.0499	0.6036	-0.7284	yes	-	-	-	-	-	-	-	HMDB0029050	Organic acids and derivatives	Carboxylic acids and derivatives	Amino acids, peptides, and analogues	94421-70-2	290.115	3.33663	M-H	C14H17N3O4	0	46.5	neg
pos_2189	6-Acetamidohexanoic acid	metab_1279	3.66e-08	4.24e-07	2.0288	2.0277	1.4338	0.5198	yes	-	-	-	-	-	-	-	HMDB0247031	Lipids and lipid-like molecules	Fatty Acyls	Fatty acids and conjugates	-	174.112	2.42017	M+H	C8H15NO3	0	34.6	pos
neg_1914	Glycylvaline	metab_8867	1.45e-09	3.09e-08	2.0245	2.0186	0.6332	-0.6594	yes	-	-	-	-	-	-	-	HMDB0028854;MJDBOTE0000605	Organic acids and derivatives	Carboxylic acids and derivatives	Amino acids, peptides, and analogues	1963-21-9	173.092	1.47718	M-H	C7H14N2O3	75.6	0	neg
pos_6040	Goyasaponin I	metab_5404	2.26e-05	8.64e-05	2.013	2.0114	0.7717	-0.374	yes	-	-	-	-	-	-	-	HMDB0037221	Lipids and lipid-like molecules	Prenol lipids	Monoterpenoids	333333-20-3	690.324	2.70878	M+2H	C65H102O31	0	66.8	pos
pos_6014	DL-Alanyl-DL-leucine	metab_5375	4.69e-14	1.11e-11	2.0125	2.0106	0.7557	-0.4041	yes	-	-	-	-	-	-	-	HMDB0251509	Organic acids and derivatives	Carboxylic acids and derivatives	Amino acids, peptides, and analogues	-	468.281	2.74773	2M+ACN+Na	C9H18N2O3	0	55.6	pos
pos_1133	Creatine	metab_147	3.59e-10	1.03e-08	2.0095	2.0081	0.7508	-0.4136	yes	C00300	-	-	map01100;map00330;map00260	Metabolic pathways;Arginine and proline metabolism;Glycine, serine and threonine metabolism	Metabolism;Metabolism;Metabolism	Global and overview maps;Amino acid metabolism;Amino acid metabolism	HMDB0000064;PW_C000046;MJDBOTE0000560	Organic acids and derivatives	Carboxylic acids and derivatives	Amino acids, peptides, and analogues	57-00-1	132.077	0.599817	M+H, M+K	C4H9N3O2	46.8	0	pos
pos_5876	Doxepin N-oxide glucuronide	metab_5226	1.64e-07	1.4e-06	2.008	2.0065	0.7447	-0.4252	yes	-	-	-	-	-	-	-	PW_C040598;HMDB0061139	Organoheterocyclic compounds	Benzoxepines	Dibenzoxepines	-	490.229	2.95848	M+NH4	C25H30NO8+	0	31.4	pos
neg_6392	3-trans-p-Coumaroylrotundic acid	metab_13716	1.89e-09	3.78e-08	2.0076	2.003	0.6472	-0.6277	yes	-	-	-	-	-	-	-	HMDB0040667	Lipids and lipid-like molecules	Prenol lipids	Triterpenoids	144624-03-3	615.372	5.28432	M-H2O-H	C39H54O7	0	74	neg
pos_7486	Pyrroline	metab_6933	1.28e-05	5.32e-05	1.9992	1.998	0.7485	-0.418	yes	C19907	-	-	-	-	-	-	HMDB0035924;HMDB0245392	Organoheterocyclic compounds	Heteroaromatic compounds	Not Available	109-97-7	70.0656	0.607633	M+H	C4H7N	0	44	pos
pos_6644	Benzene	metab_6051	5.08e-10	1.36e-08	1.9916	1.9901	0.7395	-0.4354	yes	C01407	-	-	map01100;map01220;map01120;map05208;map00362;map00361	Metabolic pathways;Degradation of aromatic compounds;Microbial metabolism in diverse environments;Chemical carcinogenesis - reactive oxygen species;Benzoate degradation;Chlorocyclohexane and chlorobenzene degradation	Metabolism;Metabolism;Metabolism;Human Diseases;Metabolism;Metabolism	Global and overview maps;Global and overview maps;Global and overview maps;Cancer: overview;Xenobiotics biodegradation and metabolism;Xenobiotics biodegradation and metabolism	HMDB0001505	Benzenoids	Benzene and substituted derivatives	Not Available	71-43-2	79.0546	1.93727	M+H	C6H6	0	38.9	pos
neg_6643	PA(8:0/i-12:0)	metab_13994	1.26e-10	4.49e-09	1.9886	1.9811	0.6443	-0.6341	yes	C00416	Lipids	Phospholipids	map01100;map00564;map01110;map00561;map05212;map05200;map04975;map04024;map05231;map04072;map04912;map04070;map04666	Metabolic pathways;Glycerophospholipid metabolism;Biosynthesis of secondary metabolites;Glycerolipid metabolism;Pancreatic cancer;Pathways in cancer;Fat digestion and absorption;cAMP signaling pathway;Choline metabolism in cancer;Phospholipase D signaling pathway;GnRH signaling pathway;Phosphatidylinositol signaling system;Fc gamma R-mediated phagocytosis	Metabolism;Metabolism;Metabolism;Metabolism;Human Diseases;Human Diseases;Organismal Systems;Environmental Information Processing;Human Diseases;Environmental Information Processing;Organismal Systems;Environmental Information Processing;Organismal Systems	Global and overview maps;Lipid metabolism;Global and overview maps;Lipid metabolism;Cancer: specific types;Cancer: overview;Digestive system;Signal transduction;Cancer: overview;Signal transduction;Endocrine system;Signal transduction;Immune system	HMDB0115685;PW_C064070	Lipids and lipid-like molecules	Glycerophospholipids	Glycerophosphates	-	501.256	4.79413	M+Na-2H	C23H45O8P	0	40	neg
neg_8552	Beta-Zearalenol	metab_17600	4.52e-08	4.65e-07	1.9865	1.9795	0.705	-0.5043	yes	C14751	-	-	-	-	-	-	HMDB0041838;HMDB0041824	Phenylpropanoids and polyketides	Macrolides and analogues	Not Available	36455-72-8;71030-11-0	699.344	2.62952	2M+Hac-H	C18H24O5	0	52.1	neg
pos_5921	4-(Phenylamino)benzoic acid	metab_5276	2.44e-11	1.34e-09	1.9823	1.9809	1.3844	0.4693	yes	C13697	-	-	-	-	-	-	HMDB0246312;HMDB0255225	Benzenoids	Benzene and substituted derivatives	Benzoic acids and derivatives	-	231.113	2.91162	M+NH4	C13H11NO2	0	43	pos
neg_1646	Urocanic Acid	metab_8592	3.71e-07	2.55e-06	1.9816	1.9777	0.6141	-0.7036	yes	C00785	-	-	map01100;map00340	Metabolic pathways;Histidine metabolism	Metabolism;Metabolism	Global and overview maps;Amino acid metabolism	HMDB0000301;HMDB0062562;PW_C000205;MJDBOTE0000716	Organoheterocyclic compounds	Azoles	Imidazoles	104-98-3;3465-72-3	137.035	0.640783	M-H	C6H6N2O2	82.8	0	neg
pos_7488	Propionic acid	metab_6935	7.15e-06	3.22e-05	1.9797	1.9785	0.814	-0.2969	yes	C00163	Organic acids	Carboxylic acids	map01100;map01220;map00640;map00642;map01120;map00760;map04973;map04974	Metabolic pathways;Degradation of aromatic compounds;Propanoate metabolism;Ethylbenzene degradation;Microbial metabolism in diverse environments;Nicotinate and nicotinamide metabolism;Carbohydrate digestion and absorption;Protein digestion and absorption	Metabolism;Metabolism;Metabolism;Metabolism;Metabolism;Metabolism;Organismal Systems;Organismal Systems	Global and overview maps;Global and overview maps;Carbohydrate metabolism;Xenobiotics biodegradation and metabolism;Global and overview maps;Metabolism of cofactors and vitamins;Digestive system;Digestive system	HMDB0000237;LMFA01010003;PW_C000159	Organic acids and derivatives	Carboxylic acids and derivatives	Carboxylic acids	1979-09-04	116.071	0.607633	M+ACN+H	C3H6O2	0	47.2	pos
pos_1548	Cinaciguat	metab_596	2.56e-06	1.36e-05	1.9743	1.9732	0.7466	-0.4216	yes	-	-	-	-	-	-	-	HMDB0250257	Phenylpropanoids and polyketides	Stilbenes	Not Available	-	294.64	1.0756	M+H+Na	C36H39NO5	0	38.1	pos
neg_2135	Lomefloxacin	metab_9103	7.07e-08	6.71e-07	1.9688	1.9637	0.687	-0.5416	yes	C07078	-	-	-	-	-	-	HMDB0015113	Organoheterocyclic compounds	Lactams	Beta lactams	98079-51-7	701.275	2.0839	2M-H	C17H19F2N3O3	0	81.6	neg
pos_2522	Cromakalim	metab_1640	4.79e-14	1.11e-11	1.9666	1.965	0.7446	-0.4255	yes	C11819	-	-	-	-	-	-	HMDB0250542	Organoheterocyclic compounds	Benzopyrans	1-benzopyrans	94470-67-4	304.165	3.08315	M+NH4	C16H18N2O3	0	54.2	pos
pos_1822	8-Cyclopentyl-3-(3-fluoro-propyl)-1-propyl-3,7-dihydro-purine-2,6-dione	metab_888	6.16e-08	6.43e-07	1.9666	1.9653	0.7694	-0.3782	yes	-	-	-	-	-	-	-	HMDB0260333	Organoheterocyclic compounds	Imidazopyrimidines	Purines and purine derivatives	-	667.351	1.8675	2M+Na	C16H23FN4O2	0	32.8	pos
neg_3839	Omadacycline	metab_10961	7.96e-07	4.83e-06	1.965	1.9586	0.6596	-0.6004	yes	-	-	-	-	-	-	-	HMDB0255962	Phenylpropanoids and polyketides	Tetracyclines	Not Available	-	555.278	4.42107	M-H	C29H40N4O7	0	64.9	neg
neg_2700	Isoleucyl-Tyrosine	metab_9720	9.01e-06	3.57e-05	1.9634	1.9523	0.6557	-0.6088	yes	-	-	-	-	-	-	-	HMDB0028919	Organic acids and derivatives	Carboxylic acids and derivatives	Amino acids, peptides, and analogues	-	293.151	2.97525	M-H	C15H22N2O4	0	54.7	neg
neg_9865	L-Histidinol	metab_17454	1e-11	5.9e-10	1.9623	1.9562	0.6465	-0.6292	yes	C00860	-	-	map01100;map00340;map01110;map01230	Metabolic pathways;Histidine metabolism;Biosynthesis of secondary metabolites;Biosynthesis of amino acids	Metabolism;Metabolism;Metabolism;Metabolism	Global and overview maps;Amino acid metabolism;Global and overview maps;Global and overview maps	HMDB0003431	Organic nitrogen compounds	Organonitrogen compounds	Amines	4836-52-6	327.178	0.616867	2M+FA-H	C6H11N3O	0	35.6	neg
neg_3358	Valyltryptophan	metab_10441	9.52e-07	5.6e-06	1.9619	1.9531	0.6401	-0.6436	yes	-	-	-	-	-	-	-	HMDB0029138	Organic acids and derivatives	Carboxylic acids and derivatives	Amino acids, peptides, and analogues	24587-37-9	302.151	3.76098	M-H	C16H21N3O3	0	34.6	neg
pos_6784	Mpomeovt	metab_6195	1.17e-06	7.01e-06	1.9618	1.9611	1.2982	0.3765	yes	-	-	-	-	-	-	-	HMDB0254916	Organic acids and derivatives	Carboxylic acids and derivatives	Amino acids, peptides, and analogues	-	549.246	1.87515	M+H+Na	C48H74N12O12S2	0	92.9	pos
pos_856	(12R)-12-Hydroxyoctadec-9-enoic acid	metab_7328	7.84e-07	5e-06	1.9595	1.9586	1.3485	0.4314	yes	-	-	-	-	-	-	-	HMDB0242322	Lipids and lipid-like molecules	Fatty Acyls	Fatty acids and conjugates	-	299.258	5.84807	M+H-2H2O, M+H	C18H34O3	0	51.7	pos
pos_2069	Prolyl-phenylalanyl-arginine-4-nitroanilide	metab_1148	3.48e-10	1e-08	1.9551	1.9535	0.8016	-0.3191	yes	-	-	-	-	-	-	-	HMDB0259666	Organic acids and derivatives	Carboxylic acids and derivatives	Amino acids, peptides, and analogues	-	602.277	2.21723	M+ACN+Na	C26H34N8O5	0	37.4	pos
neg_3490	Etimicin	metab_10587	4.7e-07	3.09e-06	1.9543	1.9445	0.6742	-0.5688	yes	-	-	-	-	-	-	-	HMDB0252101	Organic oxygen compounds	Organooxygen compounds	Carbohydrates and carbohydrate conjugates	-	498.293	3.93317	M+Na-2H	C21H43N5O7	0	45	neg
pos_2119	10-Hydroxy-octadec-12Z-enoate-9-beta-D-glucuronide	metab_1203	3.81e-05	0.000135	1.9525	1.953	0.77	-0.3771	yes	-	-	-	-	-	-	-	HMDB0060120	Lipids and lipid-like molecules	Saccharolipids	Not Available	-	535.25	2.29515	M+2Na-H	C24H42O10	0	68.6	pos
pos_5828	Gly Pro Phe	metab_5175	3.44e-10	9.97e-09	1.9509	1.9493	0.7747	-0.3683	yes	-	-	-	-	-	-	-	-	-	-	-	-	320.16	3.04425	M+H	C16H21N3O4	59.3	0	pos
neg_4267	Aplaviroc	metab_11432	9.6e-07	5.64e-06	1.9484	1.9399	1.453	0.5391	yes	-	-	-	-	-	-	-	HMDB0248516	Organoheterocyclic compounds	Piperidines	Benzylpiperidines	-	598.288	5.28432	M+Na-2H	C33H43N3O6	0	70.3	neg
pos_125	N-[4-(4-methylphenyl)-1,3-thiazol-2-yl]heptanamide	metab_274	1.61e-08	2.2e-07	1.9415	1.9387	1.276	0.3517	yes	-	-	-	-	-	-	-	-	-	-	-	-	285.144	1.89077	M+H, 2M+K, M+H-H2O	C17H22N2OS	56.1	0	pos
pos_3393	CL(8:0/11:0/15:0/18:2(9Z,11Z))	metab_2564	1.95e-07	1.62e-06	1.9395	1.9388	0.7827	-0.3534	yes	-	-	-	-	-	-	-	HMDB0118268	Lipids and lipid-like molecules	Glycerophospholipids	Glycerophosphoglycerophosphoglycerols	-	591.389	5.7388	M+2H	C61H114O17P2	0	32.4	pos
pos_2110	CDP-DG(PGD2/i-19:0)	metab_1194	8.16e-06	3.62e-05	1.9374	1.9349	1.3294	0.4107	yes	-	-	-	-	-	-	-	HMDB0294013	Not Available	Not Available	Not Available	-	568.764	2.28742	M+2Na	C51H87N3O18P2	0	45.4	pos
pos_5989	Ile Leu	metab_5346	2.36e-12	1.99e-10	1.9367	1.9348	0.797	-0.3273	yes	-	-	-	-	-	-	-	-	-	-	-	-	245.186	2.79463	M+H	C12H24N2O3	66.7	0	pos
neg_8373	Delta-Hydroxylysylnorleucine	metab_15878	7.87e-12	4.81e-10	1.9349	1.9279	0.7186	-0.4768	yes	-	-	-	-	-	-	-	HMDB0253190	Organic acids and derivatives	Carboxylic acids and derivatives	Amino acids, peptides, and analogues	-	272.162	2.86292	M-H2O-H	C12H25N3O5	0	46.2	neg
pos_6548	Prolyl-Gamma-glutamate	metab_5954	6.77e-09	1.09e-07	1.9342	1.9329	0.7988	-0.324	yes	-	-	-	-	-	-	-	HMDB0029031	Organic acids and derivatives	Carboxylic acids and derivatives	Amino acids, peptides, and analogues	-	487.251	2.04588	2M+H	C10H17N3O4	0	73.3	pos
neg_6795	Cilastatin	metab_14160	2.16e-07	1.64e-06	1.9295	1.921	0.7056	-0.503	yes	C01675	-	-	-	-	-	-	HMDB0015535;HMDB0247784;MJDBOTE0001591	Organic acids and derivatives	Carboxylic acids and derivatives	Amino acids, peptides, and analogues	82009-34-5	379.129	4.5414	M+Na-2H	C16H26N2O5S	0	48.2	neg
neg_8810	L-Phenylalanine	metab_16358	2.85e-13	3.67e-11	1.928	1.9221	0.7507	-0.4137	yes	C00079	Peptides	Amino acids	map00996;map00997;map02010;map00999;map01110;map00960;map00470;map00966;map00940;map01064;map01063;map01061;map01060;map01100;map01210;map01230;map00360;map00400;map04978;map00460;map04974;map00970;map05230;map01070	Biosynthesis of various alkaloids;Biosynthesis of various other secondary metabolites;ABC transporters;Biosynthesis of various plant secondary metabolites;Biosynthesis of secondary metabolites;Tropane, piperidine and pyridine alkaloid biosynthesis;D-Amino acid metabolism;Glucosinolate biosynthesis;Phenylpropanoid biosynthesis;Biosynthesis of alkaloids derived from ornithine, lysine and nicotinic …	Metabolism;Metabolism;Environmental Information Processing;Metabolism;Metabolism;Metabolism;Metabolism;Metabolism;Metabolism;Metabolism;Metabolism;Metabolism;Metabolism;Metabolism;Metabolism;Metabolism;Metabolism;Metabolism;Organismal Systems;Metabolism;Organismal Systems;Genetic Information Processing;Human Diseases;Metabolism	Biosynthesis of other secondary metabolites;Biosynthesis of other secondary metabolites;Membrane transport;Biosynthesis of other secondary metabolites;Global and overview maps;Biosynthesis of other secondary metabolites;Metabolism of other amino acids;Biosynthesis of other secondary metabolites;Biosynthesis of other secondary metabolites;Chemical structure transformation maps;Chemical structure t…	PW_C000104;HMDB0250791;HMDB0000159;MJDBAA00000196	Organic acids and derivatives	Carboxylic acids and derivatives	Amino acids, peptides, and analogues	63-91-2	164.071	2.308	M-H	C9H11NO2	96.9	0	neg
pos_1444	Pro His	metab_486	7.81e-08	7.69e-07	1.9264	1.9243	0.771	-0.3752	yes	-	-	-	-	-	-	-	-	-	-	-	-	253.129	0.623083	M+H	C11H16N4O3	74.7	0	pos
pos_7699	Lysyl-Lysine	metab_7167	7.24e-07	4.68e-06	1.9237	1.923	0.7435	-0.4276	yes	-	-	-	-	-	-	-	HMDB0304785;HMDB0028956	Organic acids and derivatives	Carboxylic acids and derivatives	Amino acids, peptides, and analogues	13184-13-9	138.107	0.436233	M+2H	C12H26N4O3	0	36.6	pos
neg_8413	(1E)-1-Phenyltriaz-1-ene	metab_15923	0.0001895	0.0004782	1.9197	1.9217	1.5547	0.6367	yes	-	-	-	-	-	-	-	HMDB0242314	Benzenoids	Benzene and substituted derivatives	Not Available	-	287.125	2.81438	2M+FA-H	C6H7N3	0	44	neg
neg_9265	(E,E)-1-Chloro-3,11-tridecadiene-5,7,9-triyn-2-ol	metab_16845	0.0007517	0.001591	1.919	1.9252	0.6301	-0.6664	yes	-	-	-	-	-	-	-	HMDB0034007	Organohalogen compounds	Halohydrins	Chlorohydrins	-	239.026	1.68317	M+Na-2H	C13H11ClO	0	34.4	neg
pos_2145	Ile Tyr	metab_1231	1.77e-09	3.64e-08	1.9149	1.9128	0.7865	-0.3464	yes	-	-	-	-	-	-	-	-	-	-	-	-	295.165	2.34205	M+H	C15H22N2O4	60.8	0	pos
pos_6448	(3a,5b,7a)-23-Carboxy-7-hydroxy-24-norcholan-3-yl-b-D-Glucopyranosiduronic acid	metab_5849	4.03e-07	2.9e-06	1.9148	1.9129	0.7904	-0.3394	yes	-	-	-	-	-	-	-	HMDB0002430;HMDB0243600	Lipids and lipid-like molecules	Steroids and steroid derivatives	Steroidal glycosides	58814-71-4	285.168	2.17822	M+2H	C30H48O10	0	52.2	pos
pos_6536	Phenylalanyllysine	metab_5941	3.54e-11	1.78e-09	1.9141	1.9124	0.7916	-0.3372	yes	-	-	-	-	-	-	-	HMDB0029000	Organic acids and derivatives	Carboxylic acids and derivatives	Amino acids, peptides, and analogues	6456-72-0	276.17	2.06152	M+H-H2O	C15H23N3O3	0	52.3	pos
neg_2246	Glutaminylglycine	metab_9223	1.04e-10	3.91e-09	1.9138	1.9068	0.7493	-0.4163	yes	-	-	-	-	-	-	-	HMDB0028797	Organic acids and derivatives	Carboxylic acids and derivatives	Amino acids, peptides, and analogues	2650-65-9	608.269	2.316	3M-H	C7H13N3O4	0	32.2	neg
neg_495	D-Galactose	metab_17602	2.73e-10	8e-09	1.9106	1.9046	0.7582	-0.3993	yes	C00124	Carbohydrates	Monosaccharides	map01100;map02030;map04978;map04973;map00052;map02060	Metabolic pathways;Bacterial chemotaxis;Mineral absorption;Carbohydrate digestion and absorption;Galactose metabolism;Phosphotransferase system (PTS)	Metabolism;Cellular Processes;Organismal Systems;Organismal Systems;Metabolism;Environmental Information Processing	Global and overview maps;Cell motility;Digestive system;Digestive system;Carbohydrate metabolism;Membrane transport	HMDB0250761;HMDB0003449;HMDB0000143;PW_C000093;MJDBOTE0001042	Organic oxygen compounds	Organooxygen compounds	Carbohydrates and carbohydrate conjugates	3646-73-9;7296-64-2;59-23-4;10257-28-0;59-23-4	201.038	0.744367	M+Na-2H, M+K-2H	C6H12O6	45.6	0	neg
neg_3008	Erythromycin A enol ether	metab_10060	6.02e-06	2.57e-05	1.9104	1.9014	0.6776	-0.5616	yes	-	-	-	-	-	-	-	HMDB0251934	Organic oxygen compounds	Organooxygen compounds	Carbohydrates and carbohydrate conjugates	-	752.394	3.32863	M+K-2H	C37H65NO12	0	71.4	neg
neg_2694	3-dehydrocholate	metab_9712	3.61e-11	1.68e-09	1.9095	1.9036	0.7278	-0.4583	yes	-	-	-	-	-	-	-	HMDB0000502;HMDB0304121	Lipids and lipid-like molecules	Steroids and steroid derivatives	Bile acids, alcohols and derivatives	2304-89-4	426.236	2.96727	M+Na-2H	C24H37O5-	0	45.3	neg
pos_5907	Merodesmosine	metab_5261	6.68e-11	2.82e-09	1.9044	1.9026	0.8075	-0.3084	yes	-	-	-	-	-	-	-	HMDB0030407	Organic acids and derivatives	Carboxylic acids and derivatives	Amino acids, peptides, and analogues	17096-97-8	385.244	2.92718	M+H-H2O	C18H34N4O6	0	63.7	pos
neg_1083	N-[(2S)-1-[[(2S)-1-Amino-1-oxopropan-2-yl]amino]-3-naphthalen-2-yl-1-oxopropan-2-yl]-N'-hydroxy-2-(2-methylpropyl)butanediamide	metab_7972	1.6e-08	2.04e-07	1.9005	1.8918	0.7141	-0.4858	yes	-	-	-	-	-	-	-	HMDB0258718	Organic acids and derivatives	Carboxylic acids and derivatives	Amino acids, peptides, and analogues	-	971.486	5.524	M-H, 2M+Hac-H	C24H32N4O5	0	66.9	neg
pos_2104	Gly Gly Ile	metab_1187	8.08e-09	1.24e-07	1.8993	1.8978	0.794	-0.3327	yes	-	-	-	-	-	-	-	-	-	-	-	-	246.145	2.27958	M+H	C10H19N3O4	61.6	0	pos
pos_6210	Tyr-Leu-Tyr-Glu-Ile-Ala-Arg	metab_5590	2.3e-05	8.77e-05	1.8901	1.8889	0.7814	-0.3559	yes	-	-	-	-	-	-	-	HMDB0247897	Organic acids and derivatives	Carboxylic acids and derivatives	Amino acids, peptides, and analogues	-	475.24	2.45918	M+H+Na	C44H66N10O12	0	39.4	pos
pos_6866	Betavulgaroside VII	metab_6285	5.44e-07	3.71e-06	1.8886	1.8869	0.7954	-0.3302	yes	-	-	-	-	-	-	-	HMDB0033427	Lipids and lipid-like molecules	Prenol lipids	Terpene glycosides	178535-51-8	406.205	1.7661	M+2H	C41H62O16	0	55.5	pos
pos_6623	PI(PGJ2/22:5(4Z,7Z,10Z,13Z,16Z))	metab_6029	1.18e-08	1.71e-07	1.8818	1.8805	0.792	-0.3365	yes	-	-	-	-	-	-	-	HMDB0278138	Not Available	Not Available	Not Available	-	504.247	1.95283	M+2Na	C51H79O15P	0	35.2	pos
pos_466	Isamoxole	metab_3951	2.27e-08	2.94e-07	1.8791	1.8779	0.8127	-0.2992	yes	-	-	-	-	-	-	-	HMDB0253591	Organoheterocyclic compounds	Azoles	Oxazoles	-	242.186	2.03025	M+H, M+NH4	C12H20N2O2	0	31.4	pos
neg_3180	Histidylarginine	metab_10249	3.79e-10	1.04e-08	1.8781	1.8716	0.75	-0.4151	yes	-	-	-	-	-	-	-	HMDB0028879	Organic acids and derivatives	Carboxylic acids and derivatives	Amino acids, peptides, and analogues	77369-21-2	681.358	3.54583	2M+Hac-H	C12H21N7O3	0	35.8	neg
pos_7156	Cerivastatin lactone	metab_6596	2.61e-05	9.72e-05	1.8683	1.8686	0.772	-0.3733	yes	-	-	-	-	-	-	-	HMDB0249823	Organoheterocyclic compounds	Pyridines and derivatives	Phenylpyridines	-	221.624	1.22412	M+2H	C26H32FNO4	0	32.4	pos
pos_1209	5-Acetamidovalerate	metab_229	3.4e-05	0.0001221	1.8682	1.8664	1.3121	0.3918	yes	C03087	-	-	map01100;map00310	Metabolic pathways;Lysine degradation	Metabolism;Metabolism	Global and overview maps;Amino acid metabolism	LMFA01030987;HMDB0012175	Lipids and lipid-like molecules	Fatty Acyls	Fatty acids and conjugates	-	160.097	1.75058	M+H, M+K	C7H13NO3	0	57.3	pos
pos_6414	Gibberellin A12	metab_5813	6.3e-06	2.89e-05	1.8673	1.8642	1.2767	0.3524	yes	C11857	-	-	map01100;map00904;map01110	Metabolic pathways;Diterpenoid biosynthesis;Biosynthesis of secondary metabolites	Metabolism;Metabolism;Metabolism	Global and overview maps;Metabolism of terpenoids and polyketides;Global and overview maps	LMPR0104170014;HMDB0301912;HMDB0303453	Lipids and lipid-like molecules	Prenol lipids	Diterpenoids	1164-45-0	355.186	2.21723	M+Na	C20H28O4	0	50.4	pos
pos_2415	Aciclovir	metab_1525	1.05e-06	6.41e-06	1.8667	1.8648	1.2834	0.36	yes	C06810	-	-	map04976	Bile secretion	Organismal Systems	Digestive system	HMDB0014925;MJDBOTE0001429	Organoheterocyclic compounds	Imidazopyrimidines	Purines and purine derivatives	59277-89-3	492.208	2.857	2M+ACN+H	C8H11N5O3	0	47.9	pos
neg_1456	3-Methoxytyrosine	metab_8383	1.74e-08	2.17e-07	1.8665	1.8616	0.7011	-0.5123	yes	-	-	-	-	-	-	-	HMDB0060747;HMDB0001434	Organic acids and derivatives	Carboxylic acids and derivatives	Amino acids, peptides, and analogues	7636-26-2	210.077	2.308	M-H, M+Na-2H	C10H13NO4	0	33.9	neg
pos_131	(S)-scoulerine	metab_341	6.79e-09	1.09e-07	1.8643	1.8632	0.8067	-0.3099	yes	C02106	-	-	map00950;map01100;map01110;map01063	Isoquinoline alkaloid biosynthesis;Metabolic pathways;Biosynthesis of secondary metabolites;Biosynthesis of alkaloids derived from shikimate pathway	Metabolism;Metabolism;Metabolism;Metabolism	Biosynthesis of other secondary metabolites;Global and overview maps;Global and overview maps;Chemical structure transformation maps	HMDB0304001	Alkaloids and derivatives	Protoberberine alkaloids and derivatives	Not Available	6451-73-6	696.33	1.922	M+H, 2M+ACN+H, M+H-H2O	C19H21NO4	0	41.8	pos
pos_1836	Blebbistatin	metab_903	2.86e-06	1.49e-05	1.863	1.8616	1.2823	0.3587	yes	-	-	-	-	-	-	-	HMDB0243556	Organoheterocyclic compounds	Quinolines and derivatives	Pyrroloquinolines	-	585.25	1.89077	2M+H	C18H16N2O2	0	31.3	pos
pos_2334	Eriojaposide B	metab_1435	6.36e-07	4.22e-06	1.8621	1.861	0.7977	-0.3262	yes	C17889	-	-	-	-	-	-	HMDB0038029	Lipids and lipid-like molecules	Fatty Acyls	Fatty acyl glycosides	351412-97-0	558.288	2.67748	M+ACN+H	C25H40O11	0	48.3	pos
pos_1560	Pentostatin	metab_610	5.41e-08	5.84e-07	1.8603	1.8585	0.8053	-0.3125	yes	C02267	-	-	-	-	-	-	HMDB0014692;HMDB0245535	Organoheterocyclic compounds	Imidazodiazepines	Not Available	53910-25-1	286.15	1.1069	M+NH4	C11H16N4O4	0	51.8	pos
pos_1118	Pro Thr	metab_130	1.88e-10	6.24e-09	1.8573	1.8556	0.8165	-0.2924	yes	-	-	-	-	-	-	-	-	-	-	-	-	217.118	1.26308	M+H, M+K	C9H16N2O4	72.1	0	pos
pos_7328	Glycyl-Arginine	metab_6774	0.005936	0.01139	1.8553	1.8548	0.7711	-0.375	yes	-	-	-	-	-	-	-	HMDB0028835	Organic acids and derivatives	Carboxylic acids and derivatives	Amino acids, peptides, and analogues	-	214.13	0.8022	M+H-H2O	C8H17N5O3	0	62	pos
neg_8096	Dehydroandrographolide succinate	metab_15576	0.000286	0.0006805	1.8547	1.8421	0.6873	-0.5409	yes	-	-	-	-	-	-	-	HMDB0250944	Lipids and lipid-like molecules	Prenol lipids	Terpene lactones	-	577.226	3.12012	M+FA-H	C28H36O10	0	88	neg
neg_1943	Isoleucyl-Threonine	metab_8895	9.7e-08	8.63e-07	1.8523	1.8451	0.6925	-0.5301	yes	-	-	-	-	-	-	-	HMDB0028917	Organic acids and derivatives	Carboxylic acids and derivatives	Amino acids, peptides, and analogues	-	231.135	1.6038	M-H	C10H20N2O4	0	32.4	neg
neg_6636	Histidyltryptophan	metab_13986	3.6e-06	1.69e-05	1.8485	1.8424	0.7226	-0.4688	yes	-	-	-	-	-	-	-	HMDB0028896	Organic acids and derivatives	Carboxylic acids and derivatives	Amino acids, peptides, and analogues	23403-90-9	362.121	4.81178	M+Na-2H	C17H19N5O3	0	53.4	neg
pos_2647	Ile Phe	metab_1772	3.6e-09	6.49e-08	1.8483	1.8464	0.796	-0.3291	yes	-	-	-	-	-	-	-	-	-	-	-	-	279.17	3.53455	M+H	C15H22N2O3	66.4	0	pos
neg_6084	N-Acetyl-3-hydroxyprocainamide	metab_13383	0.000313	0.0007372	1.8474	1.8464	0.673	-0.5712	yes	-	-	-	-	-	-	-	HMDB0060996	Benzenoids	Benzene and substituted derivatives	Benzoic acids and derivatives	-	631.346	5.59585	2M+FA-H	C15H23N3O3	0	56.9	neg
neg_3810	Kinetensin 4-7	metab_10935	4.94e-12	3.4e-10	1.8451	1.839	0.7141	-0.4858	yes	-	-	-	-	-	-	-	HMDB0012986	Organic acids and derivatives	Carboxylic acids and derivatives	Amino acids, peptides, and analogues	138482-56-1	592.262	4.37305	M+Na-2H	C26H37N9O6	0	47.4	neg
pos_7101	Lys Leu	metab_6538	4.05e-09	7.14e-08	1.845	1.8433	0.8296	-0.2695	yes	-	-	-	-	-	-	-	-	-	-	-	-	260.196	1.43402	M+H	C12H25N3O3	83.2	0	pos
pos_2525	Trigofoenoside E1	metab_1642	2.48e-05	9.33e-05	1.8441	1.8442	1.248	0.3196	yes	-	-	-	-	-	-	-	HMDB0038617	Lipids and lipid-like molecules	Steroids and steroid derivatives	Steroidal glycosides	101910-70-7	547.261	3.09097	M+2Na	C51H84O22	0	35.4	pos
pos_2211	Fluoroacetic acid	metab_1304	0.0005257	0.001326	1.8416	1.8397	0.7646	-0.3872	yes	C06108	-	-	map00983	Drug metabolism - other enzymes	Metabolism	Xenobiotics biodegradation and metabolism	HMDB0252369	Organic acids and derivatives	Carboxylic acids and derivatives	Alpha-halocarboxylic acids and derivatives	144-49-0	174.058	2.45145	2M+NH4	C2H3FO2	0	30.5	pos
neg_2852	(3E,6Z)-3-Benzylidene-6-[[4-[2-(dimethylamino)ethoxy]phenyl]methylidene]piperazine-2,5-dione	metab_9887	5.47e-06	2.38e-05	1.8409	1.8421	0.7545	-0.4064	yes	-	-	-	-	-	-	-	HMDB0259935	Benzenoids	Phenol ethers	Not Available	-	753.343	3.1521	2M-H	C22H23N3O3	0	45.4	neg
pos_3378	Lovastatin	metab_2547	8.57e-07	5.39e-06	1.8405	1.8397	1.2534	0.3259	yes	C07074	-	-	-	-	-	-	HMDB0248085;PW_C008769;HMDB0014372;MJDBOTE0001458	Organoheterocyclic compounds	Lactones	Delta valerolactones	75330-75-5	422.29	5.72315	M+NH4	C24H36O5	0	76.4	pos
pos_5705	Prenalterol	metab_5052	6.74e-10	1.67e-08	1.8405	1.8393	0.7868	-0.3459	yes	C07533	-	-	-	-	-	-	HMDB0256762;HMDB0243809	Benzenoids	Phenols	4-alkoxyphenols	57526-81-5	514.286	3.36337	2M+ACN+Na	C12H19NO3	0	45.7	pos
neg_7560	Milbemycin alpha9	metab_14992	1.25e-07	1.06e-06	1.8393	1.8327	1.3507	0.4337	yes	-	-	-	-	-	-	-	HMDB0254730;HMDB0254721;HMDB0254726;HMDB0242623	Phenylpropanoids and polyketides	Macrolides and analogues	Milbemycins	-	672.3	3.65033	M+Cl	C36H47NO9	0	30.3	neg
pos_7096	N2-Acetylornithine	metab_6531	6.2e-10	1.58e-08	1.8383	1.837	0.8233	-0.2805	yes	C00437	-	-	map01100;map01210;map00220;map01110;map01230	Metabolic pathways;2-Oxocarboxylic acid metabolism;Arginine biosynthesis;Biosynthesis of secondary metabolites;Biosynthesis of amino acids	Metabolism;Metabolism;Metabolism;Metabolism;Metabolism	Global and overview maps;Global and overview maps;Amino acid metabolism;Global and overview maps;Global and overview maps	HMDB0003357	Organic acids and derivatives	Carboxylic acids and derivatives	Amino acids, peptides, and analogues	6205-08-09	175.108	1.47988	M+H	C7H14N2O3	0	49.7	pos
pos_7588	Laminine	metab_7044	1.68e-07	1.43e-06	1.8379	1.8368	0.7896	-0.3409	yes	-	-	-	-	-	-	-	-	-	-	-	-	189.16	0.53765	M+H	C9H20N2O2	69.9	0	pos
neg_1028	4-Methylbenzoic Acid	metab_7828	7.67e-15	2.62e-12	1.833	1.8267	1.3668	0.4508	yes	C01454	-	-	map01100;map01220;map00622;map01120	Metabolic pathways;Degradation of aromatic compounds;Xylene degradation;Microbial metabolism in diverse environments	Metabolism;Metabolism;Metabolism;Metabolism	Global and overview maps;Global and overview maps;Xenobiotics biodegradation and metabolism;Global and overview maps	HMDB0029635	Benzenoids	Benzene and substituted derivatives	Benzoic acids and derivatives	99-94-5	135.044	5.23832	M-H, M+FA-H	C8H8O2	78.8	0	neg
neg_4705	PS(20:5(5Z,8Z,11Z,14Z,16E)-OH(18R)/20:5(5Z,8Z,11Z,14Z,17Z))	metab_11906	5.46e-11	2.35e-09	1.8288	1.8218	1.3482	0.431	yes	-	-	-	-	-	-	-	HMDB0282834	Not Available	Not Available	Not Available	-	864.447	5.74812	M+Na-2H	C46H70NO11P	0	39.7	neg
neg_2381	Z-Vdvad-fmk	metab_9371	1.03e-11	6.01e-10	1.825	1.8187	0.7677	-0.3814	yes	-	-	-	-	-	-	-	HMDB0259976	Organic acids and derivatives	Peptidomimetics	Hybrid peptides	-	694.317	2.53303	M-H	C32H46FN5O11	0	41.3	neg
pos_1958	Valyllysine	metab_1029	7.29e-12	4.98e-10	1.8226	1.8211	1.3095	0.389	yes	-	-	-	-	-	-	-	HMDB0029132	Organic acids and derivatives	Carboxylic acids and derivatives	Amino acids, peptides, and analogues	22677-62-9	210.16	2.03807	M+H-2H2O	C11H23N3O3	0	37	pos
pos_2074	Leukotriene E4	metab_1154	8.6e-08	8.35e-07	1.821	1.8196	0.8085	-0.3068	yes	C05952	Lipids	Eicosanoids	map00590;map01100;map04080;map04664	Arachidonic acid metabolism;Metabolic pathways;Neuroactive ligand-receptor interaction;Fc epsilon RI signaling pathway	Metabolism;Metabolism;Environmental Information Processing;Organismal Systems	Lipid metabolism;Global and overview maps;Signaling molecules and interaction;Immune system	PW_C001485;HMDB0002200;HMDB0247369;LMFA03020075;LMFA03020002	Lipids and lipid-like molecules	Fatty Acyls	Eicosanoids	75715-89-8	404.228	2.23277	M+H-2H2O	C23H37NO5S	0	32.8	pos
pos_1105	Epsilon-(Carboxymethyl)lysine	metab_116	2.83e-15	1.56e-12	1.8195	1.8179	0.827	-0.274	yes	-	-	-	-	-	-	-	HMDB0251887;HMDB0240347	Organic acids and derivatives	Carboxylic acids and derivatives	Amino acids, peptides, and analogues	5746-04-03	187.108	0.623083	M+H-H2O, M+ACN+H	C8H16N2O4	0	57.1	pos
pos_2082	Lablaboside C	metab_1163	1.24e-08	1.78e-07	1.8135	1.8122	0.8201	-0.2862	yes	-	-	-	-	-	-	-	HMDB0032893	Lipids and lipid-like molecules	Prenol lipids	Terpene glycosides	209802-42-6	633.314	2.24058	M+2H	C60H96O28	0	80.7	pos
neg_1064	Leucyl-Threonine	metab_7951	5.96e-09	9.32e-08	1.8131	1.8073	0.72	-0.4739	yes	-	-	-	-	-	-	-	HMDB0028939	Organic acids and derivatives	Carboxylic acids and derivatives	Amino acids, peptides, and analogues	-	213.124	1.85948	M-H2O-H, M-H	C10H20N2O4	0	30.7	neg
neg_8742	Glu-Ile-Leu-Asp-Val	metab_16282	1.11e-05	4.24e-05	1.8126	1.8099	0.7369	-0.4404	yes	-	-	-	-	-	-	-	HMDB0252757	Organic acids and derivatives	Peptidomimetics	Hybrid peptides	-	624.263	2.38802	M+K-2H	C26H45N5O10	0	87.6	neg
neg_10277	Lysyllysine	metab_7825	4.86e-06	2.16e-05	1.8117	1.8096	0.6697	-0.5784	yes	-	-	-	-	-	-	-	HMDB0304785;HMDB0028956	Organic acids and derivatives	Carboxylic acids and derivatives	Amino acids, peptides, and analogues	13184-13-9	273.193	0.448517	M-H	C12H26N4O3	0	41.3	neg
neg_7387	Dynorphin B (6-9)	metab_14802	1.39e-05	5.12e-05	1.8075	1.8033	0.7233	-0.4673	yes	-	-	-	-	-	-	-	HMDB0012937	Organic acids and derivatives	Carboxylic acids and derivatives	Amino acids, peptides, and analogues	-	626.315	3.85717	M+Na-2H	C26H43N11O6	0	78	neg
neg_2743	S-(9-hydroxy-PGA2)-glutathione	metab_9767	6.99e-10	1.74e-08	1.8062	1.801	0.7563	-0.403	yes	-	-	-	-	-	-	-	HMDB0013060	Organic acids and derivatives	Carboxylic acids and derivatives	Amino acids, peptides, and analogues	-	624.3	3.03175	M-H2O-H	C30H49N3O10S	0	60.3	neg
neg_9299	N2-Succinyl-L-ornithine	metab_16881	9.8e-05	0.0002712	1.8052	1.8061	0.7221	-0.4697	yes	C03415	-	-	map01100;map00330	Metabolic pathways;Arginine and proline metabolism	Metabolism;Metabolism	Global and overview maps;Amino acid metabolism	HMDB0001199	Organic acids and derivatives	Carboxylic acids and derivatives	Amino acids, peptides, and analogues	899816-95-6	231.098	1.56413	M-H	C9H16N2O5	0	57.5	neg
neg_6803	Sinensetin	metab_14170	0.0001022	0.0002807	1.8048	1.7968	0.687	-0.5416	yes	C10186	-	-	-	-	-	-	HMDB0036633;LMPK12111250;MJDBOTE0001259	Phenylpropanoids and polyketides	Flavonoids	O-methylated flavonoids	2306-27-6	353.101	4.5334	M-H2O-H	C20H20O7	0	33.7	neg
pos_6115	Hydroxydestruxin B	metab_5487	1.36e-07	1.2e-06	1.8043	1.8032	1.2221	0.2894	yes	-	-	-	-	-	-	-	HMDB0040135	Organic acids and derivatives	Peptidomimetics	Depsipeptides	-	654.345	2.59925	M+2Na-H	C30H51N5O8	0	81.2	pos
pos_5815	Leu Ile	metab_5162	1.42e-11	8.57e-10	1.7984	1.7967	0.8322	-0.265	yes	-	-	-	-	-	-	-	-	-	-	-	-	245.186	3.09097	M+H	C12H24N2O3	38.2	0	pos
pos_7426	Alanylarginine	metab_6873	0.000389	0.001019	1.7974	1.7969	0.7743	-0.3691	yes	-	-	-	-	-	-	-	HMDB0028681	Organic acids and derivatives	Carboxylic acids and derivatives	Amino acids, peptides, and analogues	16709-12-9	228.145	0.630917	M+H-H2O	C9H19N5O3	0	44.9	pos
neg_7991	Hexanoylglycine	metab_15460	1.54e-06	8.39e-06	1.797	1.7847	1.5062	0.5909	yes	-	-	-	-	-	-	-	HMDB0000701	Organic acids and derivatives	Carboxylic acids and derivatives	Amino acids, peptides, and analogues	24003-67-6	154.087	3.23213	M-H2O-H	C8H15NO3	0	38.6	neg
neg_3444	Cyclosquamosin B	metab_10537	2.41e-09	4.57e-08	1.7962	1.7923	0.7524	-0.4103	yes	-	-	-	-	-	-	-	HMDB0303368	Organic acids and derivatives	Carboxylic acids and derivatives	Amino acids, peptides, and analogues	-	888.41	3.87317	M+K-2H	C39H65N9O10S	0	75	neg
pos_1834	Fevicordin B 2-gentiobioside	metab_901	1.44e-06	8.41e-06	1.7941	1.7924	0.7956	-0.3299	yes	-	-	-	-	-	-	-	HMDB0035296	Lipids and lipid-like molecules	Steroids and steroid derivatives	Steroidal glycosides	151589-22-9	446.201	1.89077	M+H+Na	C43H64O18	0	44.8	pos
neg_8565	Ganoderic acid L	metab_16088	0.0002461	0.0005991	1.7921	1.7855	1.421	0.5069	yes	-	-	-	-	-	-	-	HMDB0035885	Phenylpropanoids and polyketides	Isoflavonoids	O-methylated isoflavonoids	102607-24-9	555.289	2.61355	M+Na-2H	C30H46O8	0	82.4	neg
pos_5923	Pro Pro Val	metab_5278	2.8e-05	0.0001035	1.7844	1.7829	0.776	-0.3659	yes	-	-	-	-	-	-	-	-	-	-	-	-	312.191	2.9038	M+H	C15H25N3O4	69.4	0	pos
pos_1223	Piperidines	metab_245	1.18e-07	1.07e-06	1.7832	1.7817	0.807	-0.3094	yes	-	-	-	-	-	-	-	HMDB0302905	Organoheterocyclic compounds	Piperidines	Not Available	-	329.192	1.75842	M+NH4, 2M+H	C6H14NO4+	0	32.9	pos
pos_6191	Kainic acid	metab_5568	2.65e-09	5.1e-08	1.7818	1.7798	0.7768	-0.3644	yes	C12819	-	-	-	-	-	-	HMDB0253757	Organic acids and derivatives	Carboxylic acids and derivatives	Amino acids, peptides, and analogues	487-79-6	277.118	2.48227	M+ACN+Na	C10H15NO4	0	53.9	pos
pos_6412	PS(22:5(4Z,7Z,10Z,13Z,16Z)/22:6(4Z,7Z,10Z,13Z,16Z,19Z))	metab_5811	1.96e-07	1.62e-06	1.78	1.7798	1.2338	0.3032	yes	C02737	Lipids	Phospholipids	map01100;map00564;map01110;map05146;map05322;map00260;map05140	Metabolic pathways;Glycerophospholipid metabolism;Biosynthesis of secondary metabolites;Amoebiasis;Systemic lupus erythematosus;Glycine, serine and threonine metabolism;Leishmaniasis	Metabolism;Metabolism;Metabolism;Human Diseases;Human Diseases;Metabolism;Human Diseases	Global and overview maps;Lipid metabolism;Global and overview maps;Infectious disease: parasitic;Immune disease;Amino acid metabolism;Infectious disease: parasitic	PW_C061273;HMDB0112837	Lipids and lipid-like molecules	Glycerophospholipids	Glycerophosphoserines	-	463.75	2.21723	M+2Na	C50H76NO10P	0	30.6	pos
neg_4490	PS(18:4(6Z,9Z,12Z,15Z)/20:5(5Z,8Z,10E,14Z,17Z)-OH(12))	metab_11677	0.0001644	0.0004237	1.7793	1.7645	1.3964	0.4817	yes	-	-	-	-	-	-	-	HMDB0282005	Not Available	Not Available	Not Available	-	852.415	5.57185	M+Cl	C44H68NO11P	0	73	neg
neg_2628	Americine	metab_9639	8.42e-06	3.37e-05	1.7775	1.7729	0.7219	-0.4702	yes	C09996	-	-	-	-	-	-	HMDB0034441	Organic acids and derivatives	Carboxylic acids and derivatives	Amino acids, peptides, and analogues	18867-84-0	582.254	2.8869	M+K-2H	C31H39N5O4	0	58.4	neg
neg_6478	Proline glutamate	metab_13811	1.04e-07	9.08e-07	1.7749	1.7675	0.7276	-0.4588	yes	-	-	-	-	-	-	-	HMDB0256798	Organic acids and derivatives	Carboxylic acids and derivatives	Amino acids, peptides, and analogues	-	281.073	5.1481	M+Na-2H	C10H16N2O6	0	30.7	neg
neg_3808	2-O-alpha-D-Galactopyranosyl-1-deoxynojirimycin	metab_10932	2.07e-05	7.22e-05	1.7734	1.7768	0.7192	-0.4755	yes	-	-	-	-	-	-	-	HMDB0041337	Organic oxygen compounds	Organooxygen compounds	Carbohydrates and carbohydrate conjugates	155168-05-1	360.106	4.37305	M+Cl	C12H23NO9	0	35.9	neg
pos_1100	Ser Leu Lys	metab_111	6.91e-08	7.02e-07	1.7698	1.7684	0.8078	-0.3079	yes	-	-	-	-	-	-	-	-	-	-	-	-	347.228	1.14597	M+2H, M+H	C15H30N4O5	34.4	0	pos
neg_6915	PC(2:0/20:5(7Z,9Z,11E,13E,17Z)-3OH(5,6,15))	metab_14292	4e-07	2.71e-06	1.7679	1.7611	0.7311	-0.4518	yes	-	-	-	-	-	-	-	HMDB0288872	Not Available	Not Available	Not Available	-	630.299	4.37305	M-H	C30H50NO11P	0	61.1	neg
pos_6582	Trypanothione disulfide	metab_5987	2.03e-07	1.67e-06	1.7637	1.761	1.2078	0.2724	yes	C03170	-	-	map01100;map00480	Metabolic pathways;Glutathione metabolism	Metabolism;Metabolism	Global and overview maps;Metabolism of other amino acids	HMDB0060521	Organic acids and derivatives	Carboxylic acids and derivatives	Amino acids, peptides, and analogues	96304-42-6	739.325	2.01488	M+NH4	C27H47N9O10S2	0	82.8	pos
neg_7819	8'-hydroxyabscisate	metab_15272	6.3e-10	1.61e-08	1.7599	1.7547	0.7293	-0.4553	yes	C15514	-	-	map00906;map01110	Carotenoid biosynthesis;Biosynthesis of secondary metabolites	Metabolism;Metabolism	Metabolism of terpenoids and polyketides;Global and overview maps	HMDB0304246	Lipids and lipid-like molecules	Prenol lipids	Sesquiterpenoids	-	260.104	3.40113	M-H2O-H	C15H19O5-	0	33.8	neg
pos_128	2-Butanone peroxide	metab_307	4.59e-10	1.25e-08	1.7584	1.7569	1.2314	0.3003	yes	-	-	-	-	-	-	-	HMDB0245041	Organic oxygen compounds	Organic hydroperoxides	Not Available	-	233.099	1.91418	M+H-2H2O, M+K, M+Na	C8H18O6	0	32.7	pos
neg_2791	Nemifitide	metab_9819	1.8e-10	5.75e-09	1.7511	1.7456	0.7745	-0.3687	yes	-	-	-	-	-	-	-	HMDB0255508	Organic acids and derivatives	Carboxylic acids and derivatives	Amino acids, peptides, and analogues	-	729.304	3.07962	M+Cl	C33H43FN10O6	0	73.4	neg
neg_633	Bisphenol A	metab_13649	2.57e-12	2.08e-10	1.7502	1.7445	0.7811	-0.3565	yes	C13624	-	-	map00363;map01100;map05207;map01120	Bisphenol degradation;Metabolic pathways;Chemical carcinogenesis - receptor activation;Microbial metabolism in diverse environments	Metabolism;Metabolism;Human Diseases;Metabolism	Xenobiotics biodegradation and metabolism;Global and overview maps;Cancer: overview;Global and overview maps	HMDB0032133;MJDBOTE0000553	Benzenoids	Benzene and substituted derivatives	Diphenylmethanes	1980-05-07	683.337	3.1921	M-H2O-H, 3M-H	C15H16O2	0	40.5	neg
pos_2301	CDP-DG(20:2(11Z,14Z)/22:6(4Z,7Z,11E,13Z,15E,19Z)-2OH(10S,17))	metab_1399	0.003216	0.006632	1.7492	1.7447	1.3708	0.4551	yes	-	-	-	-	-	-	-	HMDB0291887	Not Available	Not Available	Not Available	-	555.779	2.61487	M+2H	C54H85N3O17P2	0	30.5	pos
pos_6876	Pro-Pro-Pro	metab_6296	2.01e-09	4.04e-08	1.7491	1.7477	0.8315	-0.2662	yes	-	-	-	-	-	-	-	HMDB0256689	Organic acids and derivatives	Carboxylic acids and derivatives	Amino acids, peptides, and analogues	-	310.176	1.7661	M+H	C15H23N3O4	0	53.7	pos
pos_3881	7,10,13,16,19-Docosapentaenoic acid	metab_3099	1.19e-07	1.08e-06	1.7421	1.7409	1.2315	0.3004	yes	C16513	-	-	map01040	Biosynthesis of unsaturated fatty acids	Metabolism	Lipid metabolism	HMDB0247288;HMDB0006528;HMDB0246621;LMFA01030184	Lipids and lipid-like molecules	Fatty Acyls	Fatty acids and conjugates	24880-45-3	353.247	7.78225	M+Na	C22H34O2	0	62.9	pos
pos_2425	PI(22:3(10Z,13Z,16Z)/22:6(4Z,7Z,11E,13Z,15E,19Z)-2OH(10S,17))	metab_1536	3.06e-05	0.0001118	1.7403	1.736	1.2255	0.2934	yes	-	-	-	-	-	-	-	HMDB0277878	Not Available	Not Available	Not Available	-	526.279	2.87258	M+2Na	C54H87O15P	0	63.9	pos
pos_6023	2-(Fluoromethyl)-3-(3,4-dihydroxyphenyl)alanine	metab_5385	1.29e-08	1.83e-07	1.7389	1.7371	0.8203	-0.2858	yes	-	-	-	-	-	-	-	HMDB0248213	Phenylpropanoids and polyketides	Phenylpropanoic acids	Not Available	-	247.111	2.73993	M+NH4	C10H12FNO4	0	39.6	pos
neg_3665	3-Methylbutyl glucosinolate	metab_10777	5.53e-07	3.53e-06	1.7374	1.731	0.7106	-0.4928	yes	-	-	-	-	-	-	-	HMDB0038412	Organic oxygen compounds	Organooxygen compounds	Carbohydrates and carbohydrate conjugates	76265-22-0	370.063	4.17303	M-H2O-H	C12H23NO9S2	0	45.8	neg
neg_8925	Laurenoniolide	metab_16484	2.51e-08	2.89e-07	1.7358	1.7301	0.7543	-0.4068	yes	C09492	-	-	-	-	-	-	HMDB0302705	Lipids and lipid-like molecules	Prenol lipids	Terpene lactones	-	639.322	2.22015	2M+Hac-H	C17H22O4	0	30.8	neg
neg_3863	(+)-Isofebrifugine	metab_10988	8.59e-08	7.82e-07	1.7326	1.7256	0.7727	-0.372	yes	-	-	-	-	-	-	-	HMDB0242253	Organoheterocyclic compounds	Diazanaphthalenes	Benzodiazines	-	346.144	4.46122	M+FA-H	C16H19N3O3	0	55.6	neg
neg_6646	Isbogrel	metab_13997	1.42e-07	1.16e-06	1.7312	1.7252	0.7582	-0.3993	yes	-	-	-	-	-	-	-	HMDB0253595	Benzenoids	Benzene and substituted derivatives	Styrenes	-	302.118	4.78812	M+Na-2H	C18H19NO2	0	49.6	neg
pos_6185	Piperdial	metab_5562	1.31e-07	1.18e-06	1.731	1.729	0.8068	-0.3097	yes	C09711	-	-	-	-	-	-	HMDB0035798	Organic oxygen compounds	Organooxygen compounds	Alcohols and polyols	100288-36-6	295.128	2.49008	M+2Na-H	C15H22O3	0	48.9	pos
neg_2689	L-Agaritine	metab_9706	4.47e-08	4.61e-07	1.731	1.7255	0.7711	-0.3751	yes	-	-	-	-	-	-	-	HMDB0033758	Organic acids and derivatives	Carboxylic acids and derivatives	Amino acids, peptides, and analogues	-	533.236	2.95932	2M-H	C12H17N3O4	0	36	neg
pos_79	Gamma-Glutamylalanine	metab_7254	1.7e-06	9.62e-06	1.7256	1.7238	0.8308	-0.2674	yes	C03740	-	-	map01100;map00480	Metabolic pathways;Glutathione metabolism	Metabolism;Metabolism	Global and overview maps;Metabolism of other amino acids	HMDB0006248;HMDB0036301	Organic acids and derivatives	Carboxylic acids and derivatives	Amino acids, peptides, and analogues	5875-41-2	219.097	0.91145	M+H, M+K, M+Na, M+ACN+Na	C8H14N2O5	0	68.7	pos
neg_8058	Val-Pro-Asp-Pro-Arg	metab_15534	6.37e-09	9.81e-08	1.7252	1.7208	0.7687	-0.3795	yes	-	-	-	-	-	-	-	HMDB0244421	Organic acids and derivatives	Carboxylic acids and derivatives	Amino acids, peptides, and analogues	-	627.311	3.1601	M+FA-H	C25H42N8O8	0	78.9	neg
pos_1451	Histidinyl-Proline	metab_493	8.24e-11	3.32e-09	1.7251	1.7238	0.8243	-0.2788	yes	-	-	-	-	-	-	-	HMDB0304781;HMDB0028893	Organic acids and derivatives	Carboxylic acids and derivatives	Amino acids, peptides, and analogues	20930-58-9	235.119	0.630917	M+H-H2O	C11H16N4O3	0	61.8	pos
neg_3579	Leukotriene F4	metab_10684	3.3e-07	2.32e-06	1.7237	1.7179	0.7557	-0.4042	yes	C06462	Lipids	Eicosanoids	map00590;map01100	Arachidonic acid metabolism;Metabolic pathways	Metabolism;Metabolism	Lipid metabolism;Global and overview maps	LMFA03020076;LMFA03020009;HMDB0006465	Lipids and lipid-like molecules	Fatty Acyls	Eicosanoids	-	567.278	4.06103	M-H	C28H44N2O8S	0	48.6	neg
neg_7855	AFN911	metab_15312	4.05e-05	0.0001269	1.7234	1.7169	0.7286	-0.4568	yes	-	-	-	-	-	-	-	HMDB0013863	Organoheterocyclic compounds	Diazines	Pyrimidines and pyrimidine derivatives	-	546.242	3.36123	M+Cl	C29H33N7O2	0	82.9	neg
neg_2548	4-hydroxy-2-nonenal-[Cys-Gly] conjugate	metab_9552	1.14e-09	2.55e-08	1.7231	1.7188	0.7822	-0.3544	yes	-	-	-	-	-	-	-	HMDB0304175	Organic acids and derivatives	Carboxylic acids and derivatives	Amino acids, peptides, and analogues	-	667.305	2.77452	2M-H	C14H26N2O5S	0	78.5	neg
pos_5964	Dazmegrel	metab_5320	4.48e-05	0.0001552	1.7228	1.7218	0.8061	-0.3109	yes	-	-	-	-	-	-	-	HMDB0250884	Organoheterocyclic compounds	Indoles and derivatives	Indolyl carboxylic acids and derivatives	-	584.303	2.82572	2M+NH4	C16H17N3O2	0	34.6	pos
neg_7066	Repaglinide	metab_14451	0.01622	0.02436	1.7205	1.7362	0.648	-0.6259	yes	C07670	-	-	-	-	-	-	HMDB0015048;PW_C009360;MJDBOTE0001384	Organoheterocyclic compounds	Piperidines	Phenylpiperidines	135062-02-1	487.241	4.19705	M+Cl	C27H36N2O4	0	54	neg
pos_1790	Capsicoside A1	metab_852	2.92e-10	8.84e-09	1.72	1.7182	0.8307	-0.2676	yes	-	-	-	-	-	-	-	HMDB0303762	Lipids and lipid-like molecules	Steroids and steroid derivatives	Steroidal glycosides	-	320.176	1.82057	M+2Na	C33H54O9	0	35.9	pos
pos_7098	Deoxyguanosine	metab_6533	2.18e-05	8.37e-05	1.7193	1.718	1.2178	0.2843	yes	C00330	Nucleic acids	Nucleosides	map01100;map02010;map01232;map00230	Metabolic pathways;ABC transporters;Nucleotide metabolism;Purine metabolism	Metabolism;Environmental Information Processing;Metabolism;Metabolism	Global and overview maps;Membrane transport;Global and overview maps;Nucleotide metabolism	PW_C000058;HMDB0000085;MJDBOTE0000696	Nucleosides, nucleotides, and analogues	Purine nucleosides	Purine 2''-deoxyribonucleosides	961-07-9	268.104	1.46467	M+H	C10H13N5O4	0	73.3	pos
neg_7661	1,2,3,10-Tetramethoxy-7-(methylamino)-6,7-dihydro-5H-benzo[a]heptalen-9-one	metab_15101	7.37e-10	1.81e-08	1.7152	1.7094	0.7917	-0.337	yes	C11250	-	-	map00950;map01110;map01063	Isoquinoline alkaloid biosynthesis;Biosynthesis of secondary metabolites;Biosynthesis of alkaloids derived from shikimate pathway	Metabolism;Metabolism;Metabolism	Biosynthesis of other secondary metabolites;Global and overview maps;Chemical structure transformation maps	HMDB0250401	Hydrocarbon derivatives	Tropones	Not Available	-	741.342	3.56182	2M-H	C21H25NO5	0	51	neg
neg_1403	PA(20:5(6E,8Z,11Z,14Z,17Z)-OH(5)/18:4(6Z,9Z,12Z,15Z))	metab_8325	4.28e-13	4.99e-11	1.7151	1.7097	0.796	-0.3291	yes	-	-	-	-	-	-	-	HMDB0264371	Not Available	Not Available	Not Available	-	767.369	2.22815	M+Cl, M+K-2H	C41H63O9P	0	38.1	neg
pos_5963	N-Acetyltyrosine	metab_5319	1.57e-06	9.01e-06	1.7133	1.7118	0.7928	-0.335	yes	C01657	-	-	-	-	-	-	HMDB0244966;HMDB0000866	Organic acids and derivatives	Carboxylic acids and derivatives	Amino acids, peptides, and analogues	537-55-3	188.07	2.83355	M+H-2H2O	C11H13NO4	0	46.8	pos
neg_7396	Xanthohumol	metab_17617	2.56e-06	1.28e-05	1.7124	1.7126	1.3027	0.3815	yes	C16417	-	-	map00941	Flavonoid biosynthesis	Metabolism	Biosynthesis of other secondary metabolites	LMPK12120294;HMDB0030610;HMDB0037479;MJDBOTE0001182	Phenylpropanoids and polyketides	Linear 1,3-diarylpropanoids	Chalcones and dihydrochalcones	6754-58-1;115063-39-3	753.295	3.84917	2M+FA-H	C21H22O5	0	44.2	neg
neg_6030	Danatrol	metab_13327	2.57e-10	7.66e-09	1.7109	1.704	0.7721	-0.3731	yes	C06938	-	-	-	-	-	-	HMDB0250842;HMDB0002835	Lipids and lipid-like molecules	Steroids and steroid derivatives	Estrane steroids	17230-88-5	358.18	5.63635	M+Na-2H	C22H27NO2	0	48.4	neg
pos_6677	S-(PGA2)-glutathione	metab_6081	1.23e-08	1.77e-07	1.7108	1.7091	1.2043	0.2682	yes	-	-	-	-	-	-	-	HMDB0013062	Organic acids and derivatives	Carboxylic acids and derivatives	Amino acids, peptides, and analogues	-	624.298	1.91418	M+H-H2O	C30H47N3O10S	0	59.9	pos
pos_5634	Propham	metab_4983	4.23e-06	2.07e-05	1.7071	1.7049	0.787	-0.3456	yes	C18887	-	-	-	-	-	-	-	-	-	-	122-42-9	180.102	3.5967	M+H	C10H13NO2	59.8	0	pos
neg_2799	Mucronine D	metab_9827	3.29e-08	3.6e-07	1.7054	1.7005	0.7704	-0.3763	yes	C10009	-	-	-	-	-	-	HMDB0029335	Organic acids and derivatives	Carboxylic acids and derivatives	Amino acids, peptides, and analogues	38496-00-3	682.353	3.0876	M+Na-2H	C37H51N5O6	0	30.5	neg
pos_6991	N6-beta-Aspartyllysine	metab_6422	1.15e-05	4.87e-05	1.7043	1.7041	0.8233	-0.2806	yes	-	-	-	-	-	-	-	HMDB0004985	Organic acids and derivatives	Carboxylic acids and derivatives	Amino acids, peptides, and analogues	5853-83-8	303.166	1.72718	M+ACN+H	C10H19N3O5	0	36.5	pos
neg_9253	Deoxyguanylic Acid	metab_16833	3.64e-08	3.92e-07	1.7043	1.7009	0.7653	-0.3859	yes	C00362	Nucleic acids	Nucleotides	map01100;map01232;map00230	Metabolic pathways;Nucleotide metabolism;Purine metabolism	Metabolism;Metabolism;Metabolism	Global and overview maps;Global and overview maps;Nucleotide metabolism	HMDB0001044	Nucleosides, nucleotides, and analogues	Purine nucleotides	Purine deoxyribonucleotides	902-04-5	346.056	1.69913	M-H	C10H14N5O7P	48.2	0	neg
neg_7665	Tryptophyl-Glutamine	metab_15105	1.49e-07	1.21e-06	1.7039	1.6931	1.3465	0.4292	yes	-	-	-	-	-	-	-	HMDB0029081	Organic acids and derivatives	Carboxylic acids and derivatives	Amino acids, peptides, and analogues	-	377.146	3.56182	M+FA-H	C16H20N4O4	0	64.8	neg
pos_6246	1-[2-(benzylamino)-2-oxoethyl]piperidine-4-carboxamide	metab_5628	6.34e-10	1.6e-08	1.7039	1.7026	0.804	-0.3148	yes	-	-	-	-	-	-	-	-	-	-	-	-	276.17	2.42798	M+H	C15H21N3O2	76.1	0	pos
neg_3172	Norbinaltorphimine	metab_10240	2.52e-06	1.26e-05	1.6995	1.6962	0.7555	-0.4044	yes	C18130	-	-	-	-	-	-	HMDB0255724	Alkaloids and derivatives	Morphinans	Not Available	105618-26-6	696.285	3.5378	M+Cl	C40H43N3O6	0	83.8	neg
pos_6022	2-[2-(4-Hydroxy-3-methoxyphenyl)ethyl]-5-octylfuran	metab_5384	1.54e-06	8.92e-06	1.6982	1.6981	1.2224	0.2897	yes	-	-	-	-	-	-	-	HMDB0040928	Lipids and lipid-like molecules	Fatty Acyls	Fatty acids and conjugates	143114-92-5	375.191	2.73993	M+2Na-H	C21H30O3	0	56.7	pos
neg_2535	Puromycin	metab_9538	0.0005501	0.00121	1.698	1.6941	0.7315	-0.451	yes	C01610	-	-	map01100;map01110;map00998	Metabolic pathways;Biosynthesis of secondary metabolites;Biosynthesis of various antibiotics	Metabolism;Metabolism;Metabolism	Global and overview maps;Global and overview maps;Biosynthesis of other secondary metabolites	HMDB0256926	Nucleosides, nucleotides, and analogues	Purine nucleosides	Purine 3''-deoxyribonucleosides	53-79-2	508.168	2.7579	M+K-2H	C22H29N7O5	0	65.5	neg
neg_5028	Glycerophospho-N-Palmitoyl Ethanolamine	metab_12243	5.58e-10	1.46e-08	1.6906	1.685	0.7918	-0.3369	yes	-	-	-	-	-	-	-	-	-	-	-	-	452.278	7.0783	M-H	C21H44NO7P	42.5	0	neg
neg_6609	Di-deacetyl adrogolide	metab_13956	0.0001985	0.0004973	1.6889	1.688	0.7203	-0.4733	yes	-	-	-	-	-	-	-	HMDB0247722	Organoheterocyclic compounds	Quinolines and derivatives	Quinolones and derivatives	-	336.102	4.86122	M+Na-2H	C18H21NO2S	0	47.8	neg
neg_3434	Paracetamol mercapturate	metab_10526	1.52e-08	1.94e-07	1.6875	1.6831	0.7422	-0.43	yes	-	-	-	-	-	-	-	HMDB0256121;HMDB0242140	Organic acids and derivatives	Carboxylic acids and derivatives	Amino acids, peptides, and analogues	-	295.076	3.87317	M-H	C13H16N2O4S	0	32.9	neg
neg_1873	Deltaline	metab_8826	3.26e-07	2.31e-06	1.687	1.6817	0.7672	-0.3822	yes	C08679	-	-	-	-	-	-	HMDB0250984	Lipids and lipid-like molecules	Prenol lipids	Diterpenoids	6836-11-09	542.258	1.25573	M+Cl	C27H41NO8	0	54.9	neg
neg_3608	2-Hydroxyphenylacetic Acid	metab_10715	8.15e-10	1.94e-08	1.6851	1.6781	1.2997	0.3782	yes	C05852	-	-	map01100;map00360;map01120;map00643	Metabolic pathways;Phenylalanine metabolism;Microbial metabolism in diverse environments;Styrene degradation	Metabolism;Metabolism;Metabolism;Metabolism	Global and overview maps;Amino acid metabolism;Global and overview maps;Xenobiotics biodegradation and metabolism	HMDB0000669;MJDBOTE0000611	Benzenoids	Benzene and substituted derivatives	Phenylacetic acids	614-75-5	151.039	4.10102	M-H	C8H8O3	64.4	0	neg
pos_5619	Propafenone	metab_4966	1.31e-09	2.83e-08	1.6829	1.6816	1.2362	0.3059	yes	C07381	-	-	-	-	-	-	HMDB0015313	Phenylpropanoids and polyketides	Linear 1,3-diarylpropanoids	Not Available	54063-53-5	386.17	3.64317	M+2Na-H	C21H27NO3	0	39	pos
neg_2630	PGP(LTE4/a-13:0)	metab_9642	3.28e-05	0.0001062	1.6792	1.6654	1.3077	0.387	yes	-	-	-	-	-	-	-	HMDB0274301	Not Available	Not Available	Not Available	-	924.407	2.8869	M-H2O-H	C42H75NO16P2S	0	80.4	neg
neg_7463	Cyclo(aspartylleucylthreonylvalyltyrosylphenylalanylglycyl)	metab_14886	2.35e-08	2.74e-07	1.6773	1.6723	0.7966	-0.328	yes	-	-	-	-	-	-	-	HMDB0303713	Organic acids and derivatives	Carboxylic acids and derivatives	Amino acids, peptides, and analogues	-	794.369	3.76098	M-H	C39H53N7O11	0	76	neg
neg_4513	Evobioside	metab_11702	4.7e-09	7.75e-08	1.6769	1.6737	0.7684	-0.3801	yes	-	-	-	-	-	-	-	HMDB0038020	Organoheterocyclic compounds	Furans	Furoic acid and derivatives	79435-42-0	703.331	5.58785	M+Na-2H	C35H54O13	0	80.3	neg
neg_6815	Ansamitocin P-3	metab_14182	0.002685	0.004903	1.6762	1.6884	0.7645	-0.3874	yes	C12045	-	-	map01052;map01051;map01110	Type I polyketide structures;Biosynthesis of ansamycins;Biosynthesis of secondary metabolites	Metabolism;Metabolism;Metabolism	Metabolism of terpenoids and polyketides;Metabolism of terpenoids and polyketides;Global and overview maps	HMDB0248452	Phenylpropanoids and polyketides	Macrolactams	Not Available	66584-72-3	655.237	4.5174	M+Na-2H	C32H43ClN2O9	0	46.4	neg
neg_2526	Isoleucyl-Valine	metab_9528	2.71e-11	1.34e-09	1.676	1.6699	0.7786	-0.361	yes	-	-	-	-	-	-	-	HMDB0028920	Organic acids and derivatives	Carboxylic acids and derivatives	Amino acids, peptides, and analogues	-	229.155	2.7419	M-H	C11H22N2O3	0	43.7	neg
neg_3648	Avenanthramide 1f	metab_10758	2.27e-10	7.02e-09	1.6719	1.666	0.7908	-0.3385	yes	-	-	-	-	-	-	-	HMDB0029283	Phenylpropanoids and polyketides	Cinnamic acids and derivatives	Hydroxycinnamic acids and derivatives	-	294.077	4.14905	M-H2O-H	C17H15NO5	0	34.6	neg
pos_2307	Tyr Leu	metab_1405	1.05e-05	4.48e-05	1.6718	1.6692	0.8143	-0.2963	yes	-	-	-	-	-	-	-	-	-	-	-	-	295.165	2.6305	M+H	C15H22N2O4	41.4	0	pos
pos_5669	Bucillamine	metab_5018	3.92e-07	2.84e-06	1.6711	1.6704	0.8228	-0.2814	yes	-	-	-	-	-	-	-	HMDB0249419	Organic acids and derivatives	Carboxylic acids and derivatives	Amino acids, peptides, and analogues	-	206.03	3.47252	M+H-H2O	C7H13NO3S2	0	35.8	pos
pos_64	Gly Pro Gln	metab_5796	7.14e-05	0.0002321	1.6673	1.6678	0.8298	-0.2691	yes	-	-	-	-	-	-	-	-	-	-	-	-	301.15	0.623083	M+H, M+K, M+CH3OH+H, M+Na	C12H20N4O5	58.1	0	pos
pos_1618	Ser Val	metab_673	2.12e-07	1.73e-06	1.6672	1.6661	0.8186	-0.2887	yes	-	-	-	-	-	-	-	-	-	-	-	-	205.118	1.31762	M+H	C8H16N2O4	47.3	0	pos
pos_7441	Canavalioside	metab_6888	3.86e-06	1.92e-05	1.6634	1.6623	0.823	-0.281	yes	-	-	-	-	-	-	-	HMDB0036317	Lipids and lipid-like molecules	Prenol lipids	Terpene glycosides	316141-31-8	274.139	0.623083	M+2H	C26H42O12	0	43.9	pos
neg_5837	Nona-2,4-dienoylcarnitine	metab_13122	8.69e-10	2.04e-08	1.6633	1.6573	0.7448	-0.425	yes	-	-	-	-	-	-	-	HMDB0241768	Lipids and lipid-like molecules	Fatty Acyls	Fatty acid esters	-	318.171	5.75605	M+Na-2H	C16H27NO4	0	31.8	neg
neg_8955	3-Amino-3-(4-hydroxyphenyl)propanoic Acid	metab_16516	4.9e-10	1.31e-08	1.6625	1.6569	0.7644	-0.3877	yes	C04368	-	-	map00350	Tyrosine metabolism	Metabolism	Amino acid metabolism	HMDB0003831	Organic acids and derivatives	Carboxylic acids and derivatives	Amino acids, peptides, and analogues	-	180.066	2.09185	M-H	C9H11NO3	52	0	neg
neg_3663	Pivagabine	metab_10775	5.25e-06	2.3e-05	1.6601	1.6485	1.3843	0.4691	yes	-	-	-	-	-	-	-	HMDB0246575	Organic acids and derivatives	Carboxylic acids and derivatives	Amino acids, peptides, and analogues	-	168.102	4.17303	M-H2O-H	C9H17NO3	0	33.5	neg
pos_50	Plastoquinone 3	metab_4324	5.59e-06	2.63e-05	1.66	1.6588	1.2212	0.2883	yes	-	-	-	-	-	-	-	HMDB0033786	Lipids and lipid-like molecules	Prenol lipids	Diterpenoids	1168-52-1	323.236	5.67623	M+H-H2O, M+ACN+H, M+H, M+H-2H2O	C23H32O2	0	32.4	pos
neg_762	Uric Acid	metab_15056	2.65e-08	3.03e-07	1.6541	1.6492	1.2294	0.2979	yes	C00366	-	-	map01100;map04976;map00230;map01120	Metabolic pathways;Bile secretion;Purine metabolism;Microbial metabolism in diverse environments	Metabolism;Organismal Systems;Metabolism;Metabolism	Global and overview maps;Digestive system;Nucleotide metabolism;Global and overview maps	PW_C000195;HMDB0000289;MJDBOTE0001097	Organoheterocyclic compounds	Imidazopyrimidines	Purines and purine derivatives	69-93-2	167.02	1.18403	M-H, 2M-H	C5H4N4O3	89.9	0	neg
pos_1431	4-Amino-1-piperidinecarboxylic acid	metab_474	5.99e-10	1.54e-08	1.6522	1.6507	0.8246	-0.2782	yes	C16837	-	-	-	-	-	-	HMDB0060385	Organoheterocyclic compounds	Piperidines	Piperidinecarboxylic acids and derivatives	959317-82-9	186.124	0.599817	M+ACN+H	C6H12N2O2	0	47.9	pos
pos_2260	Ile Leu Glu	metab_1355	0.001422	0.003215	1.6512	1.6555	0.8137	-0.2974	yes	-	-	-	-	-	-	-	-	-	-	-	-	374.228	2.54465	M+H	C17H31N3O6	79.9	0	pos
neg_5420	Glycerophospho-N-Oleoyl Ethanolamine	metab_12675	3.41e-10	9.54e-09	1.6501	1.6469	0.8034	-0.3158	yes	-	-	-	-	-	-	-	-	-	-	-	-	478.294	7.0783	M-H	C23H46NO7P	64.2	0	neg
pos_5553	Phe Leu	metab_4899	1.2e-05	5.04e-05	1.6501	1.649	0.8306	-0.2678	yes	-	-	-	-	-	-	-	-	-	-	-	-	279.17	3.81357	M+H	C15H22N2O3	68.8	0	pos
neg_4190	Lycorine	metab_11347	8.78e-10	2.05e-08	1.648	1.6422	0.8228	-0.2814	yes	C08532	-	-	map00950;map01063	Isoquinoline alkaloid biosynthesis;Biosynthesis of alkaloids derived from shikimate pathway	Metabolism;Metabolism	Biosynthesis of other secondary metabolites;Chemical structure transformation maps	HMDB0254256;MJDBOTE0000964	Alkaloids and derivatives	Amaryllidaceae alkaloids	Lycorine-type amaryllidaceae alkaloids	476-28-8	308.092	5.1481	M+Na-2H	C16H17NO4	0	40.5	neg
neg_8343	PGP(22:5(7Z,10Z,13Z,16Z,19Z)/5-iso PGF2VI)	metab_15845	9.67e-07	5.67e-06	1.6479	1.6441	1.2897	0.3671	yes	-	-	-	-	-	-	-	HMDB0274102	Not Available	Not Available	Not Available	-	981.428	2.8869	M+Cl	C46H76O16P2	0	75.4	neg
pos_6237	Alpha-Methyltryptamine	metab_5619	8.09e-05	0.0002586	1.6472	1.6437	1.2557	0.3285	yes	C20127	-	-	-	-	-	-	HMDB0245770	Organoheterocyclic compounds	Indoles and derivatives	Indoles	299-26-3	207.149	2.4358	M+CH3OH+H	C11H14N2	0	56	pos
neg_3783	LysoPE(0:0/18:2(9Z,12Z))	metab_10904	3.35e-12	2.55e-10	1.6448	1.6396	0.8069	-0.3096	yes	-	-	-	-	-	-	-	HMDB0011477	Lipids and lipid-like molecules	Glycerophospholipids	Glycerophosphoethanolamines	-	498.257	4.34105	M+Na-2H	C23H44NO7P	0	68.6	neg
neg_2637	Enkephalin L	metab_9649	1.74e-12	1.43e-10	1.6418	1.6365	0.8157	-0.2939	yes	-	-	-	-	-	-	-	HMDB0001045	Organic acids and derivatives	Carboxylic acids and derivatives	Amino acids, peptides, and analogues	14-18-6	600.264	2.89488	M+FA-H	C28H37N5O7	0	74.8	neg
pos_6230	Ala Gly Ile	metab_5612	3.57e-09	6.47e-08	1.6389	1.6382	0.8228	-0.2815	yes	-	-	-	-	-	-	-	-	-	-	-	-	260.16	2.44362	M+H	C11H21N3O4	42	0	pos
neg_3178	Beta-Alanine, N-(N-(2-((2,2-dimethyl-1,3-dioxolan-4-yl)methoxy)-2-oxo-1-(phenylmethyl)ethyl)-L-phenylalanyl)-	metab_10246	0.0001	0.0002758	1.6358	1.6347	0.7733	-0.3709	yes	-	-	-	-	-	-	-	HMDB0257549	Organic acids and derivatives	Peptidomimetics	Hybrid peptides	-	479.215	3.54583	M-H2O-H	C27H34N2O7	0	36.5	neg
neg_4092	1,2-dibutyrin	metab_11239	2.14e-06	1.09e-05	1.6322	1.6261	0.7735	-0.3706	yes	-	-	-	-	-	-	-	HMDB0304007	Lipids and lipid-like molecules	Glycerolipids	Diradylglycerols	-	463.256	4.90652	2M-H	C11H20O5	0	48.5	neg
neg_3959	PC(2:0/20:4(6Z,8E,10E,14Z)-2OH(5S,12R))	metab_11092	0.0002269	0.0005577	1.6321	1.6343	1.3552	0.4386	yes	-	-	-	-	-	-	-	HMDB0288838	Not Available	Not Available	Not Available	-	654.278	4.64595	M+K-2H	C30H52NO10P	0	59.2	neg
neg_6804	2-[[2-(4-Hydroxyphenyl)ethylamino]methyl]-3,4-dihydro-2H-naphthalen-1-one	metab_14171	1.28e-10	4.54e-09	1.6293	1.6231	0.8013	-0.3196	yes	-	-	-	-	-	-	-	HMDB0253061	Benzenoids	Tetralins	Not Available	-	316.133	4.5334	M+Na-2H	C19H21NO2	0	57.1	neg
neg_3035	Leucyl-leucine	metab_10090	3.27e-12	2.54e-10	1.6269	1.6208	0.7883	-0.3431	yes	C11332	-	-	-	-	-	-	HMDB0254039;HMDB0028933	Organic acids and derivatives	Carboxylic acids and derivatives	Amino acids, peptides, and analogues	3303-31-9;2883-36-5	243.171	3.3692	M-H	C12H24N2O3	0	35.3	neg
neg_8741	Didanosine	metab_16281	2.61e-10	7.75e-09	1.6207	1.6135	0.7709	-0.3753	yes	C06953	-	-	-	-	-	-	HMDB0015037;PW_C009350	Nucleosides, nucleotides, and analogues	Purine nucleosides	Purine 2'',3''-dideoxyribonucleosides	69655-05-6	281.089	2.39602	M+FA-H	C10H12N4O3	50	0	neg
neg_8414	Arginylisoleucine	metab_15924	0.000125	0.0003337	1.6182	1.6178	0.7345	-0.4451	yes	-	-	-	-	-	-	-	HMDB0028712	Organic acids and derivatives	Carboxylic acids and derivatives	Amino acids, peptides, and analogues	62632-70-6	268.178	2.81438	M-H2O-H	C12H25N5O3	0	38.7	neg
pos_2277	N-Isobutyryl-L-cysteine	metab_1372	0.0001312	0.0003926	1.6085	1.607	0.8285	-0.2714	yes	-	-	-	-	-	-	-	HMDB0255162	Organic acids and derivatives	Carboxylic acids and derivatives	Amino acids, peptides, and analogues	-	174.058	2.57593	M+H-H2O	C7H13NO3S	0	40.2	pos
neg_6271	(2r,3r,5s,6r)-2,6-Bis(hydroxymethyl)piperidine-3,4,5-triol	metab_13585	2.81e-08	3.18e-07	1.6084	1.6064	0.7917	-0.337	yes	-	-	-	-	-	-	-	HMDB0242543	Organoheterocyclic compounds	Piperidines	Not Available	-	578.283	5.46455	3M-H	C7H15NO5	0	46.6	neg
neg_6101	DG(LTE4/0:0/i-12:0)	metab_13403	1.72e-09	3.51e-08	1.6054	1.6014	0.805	-0.3129	yes	-	-	-	-	-	-	-	HMDB0298381	Not Available	Not Available	Not Available	-	732.394	5.58785	M+K-2H	C38H65NO8S	0	83.1	neg
pos_7218	Beta-Alanyl-L-arginine	metab_6663	0.0038	0.00767	1.5996	1.599	0.8273	-0.2735	yes	C05340	-	-	map01100;map00410	Metabolic pathways;beta-Alanine metabolism	Metabolism;Metabolism	Global and overview maps;Metabolism of other amino acids	HMDB0060441	Organic acids and derivatives	Peptidomimetics	Hybrid peptides	-	228.145	1.09908	M+H-H2O	C9H19N5O3	0	52.7	pos
neg_8463	Nelfinavir	metab_15977	1.35e-05	5.01e-05	1.5978	1.592	1.2936	0.3714	yes	C07257	-	-	-	-	-	-	HMDB0014365	Organic acids and derivatives	Carboxylic acids and derivatives	Amino acids, peptides, and analogues	159989-64-7	612.311	2.7419	M+FA-H	C32H45N3O4S	0	83.8	neg
neg_2832	1-Isothiocyanatopentane	metab_9865	0.0001368	0.0003607	1.5978	1.5929	0.7535	-0.4083	yes	-	-	-	-	-	-	-	HMDB0038433	Organosulfur compounds	Isothiocyanates	Not Available	629-12-9	128.053	3.1361	M-H	C6H11NS	0	34.4	neg
pos_5726	Pratosartan	metab_5070	0.0001359	0.0004053	1.5901	1.59	1.2057	0.2699	yes	-	-	-	-	-	-	-	HMDB0256736	Benzenoids	Benzene and substituted derivatives	Biphenyls and derivatives	-	449.202	3.27803	M+Na	C25H26N6O	0	42.5	pos
neg_4840	PE(18:0/0:0)	metab_12049	0.0004528	0.001024	1.5862	1.5778	0.8044	-0.3141	yes	-	-	-	-	-	-	-	LMGP02050001	-	-	-	-	480.309	6.02305	M-H	C23H48NO7P	55.7	0	neg
neg_6211	Isoketocamphoric acid	metab_13520	8.19e-07	4.93e-06	1.5853	1.5818	0.7564	-0.4027	yes	-	-	-	-	-	-	-	HMDB0301824	Lipids and lipid-like molecules	Fatty Acyls	Fatty acids and conjugates	-	215.092	5.524	M-H	C10H16O5	0	35.3	neg
neg_3319	((2R,3S)-3-Amino-2-hydroxy-2-(1H-imidazol-4-ylmethyl)-5-methyl)-5-methylhexanoic Acid	metab_10398	6.27e-10	1.61e-08	1.5795	1.5739	0.8068	-0.3097	yes	-	-	-	-	-	-	-	HMDB0242228	Organic acids and derivatives	Carboxylic acids and derivatives	Amino acids, peptides, and analogues	-	527.283	3.705	2M+FA-H	C11H19N3O3	0	32.2	neg
pos_7055	Kyotorphin	metab_6490	0.0002138	0.0006036	1.5788	1.5764	0.8134	-0.298	yes	C02993	-	-	-	-	-	-	HMDB0029099;HMDB0005768	Organic acids and derivatives	Carboxylic acids and derivatives	Amino acids, peptides, and analogues	70904-56-2	338.182	1.66472	M+H	C15H23N5O4	0	55.5	pos
neg_6936	Tyr-D-thr-gly-phe-leu-thr	metab_14314	2.06e-08	2.49e-07	1.5764	1.5711	0.8096	-0.3047	yes	-	-	-	-	-	-	-	HMDB0251632	Organic acids and derivatives	Carboxylic acids and derivatives	Amino acids, peptides, and analogues	-	721.316	4.35705	M+Na-2H	C34H48N6O10	0	86.4	neg
neg_6556	Falipamil	metab_13897	9.29e-06	3.65e-05	1.5706	1.5676	0.7786	-0.361	yes	-	-	-	-	-	-	-	HMDB0252160	Organoheterocyclic compounds	Isoindoles and derivatives	Isoindolines	-	473.225	4.9819	M+FA-H	C24H32N2O5	0	34.6	neg
neg_3094	Threonyltryptophan	metab_10154	3.32e-07	2.33e-06	1.5679	1.5623	0.7632	-0.3899	yes	-	-	-	-	-	-	-	HMDB0029072	Organic acids and derivatives	Carboxylic acids and derivatives	Amino acids, peptides, and analogues	186761-42-2	304.13	3.44182	M-H	C15H19N3O4	0	42.5	neg
pos_2386	Agar	metab_1492	1.35e-05	5.59e-05	1.5648	1.5633	0.8247	-0.278	yes	C08815	-	-	-	-	-	-	HMDB0248056	Organic oxygen compounds	Organooxygen compounds	Carbohydrates and carbohydrate conjugates	9002-18-0	319.14	2.80235	M+H-H2O	C14H24O9	0	42.4	pos
neg_2127	Glycyl-L-Tyrosine	metab_9094	8.72e-10	2.04e-08	1.5631	1.5588	0.8085	-0.3067	yes	-	-	-	-	-	-	-	HMDB0028853	Organic acids and derivatives	Carboxylic acids and derivatives	Amino acids, peptides, and analogues	658-79-7	237.088	2.06795	M-H	C11H14N2O4	79.8	0	neg
neg_2753	Veratrine	metab_9778	2.59e-08	2.97e-07	1.5597	1.557	0.812	-0.3004	yes	-	-	-	-	-	-	-	HMDB0259783	Lipids and lipid-like molecules	Steroids and steroid derivatives	Steroidal alkaloids	-	628.295	3.04768	M+K-2H	C32H49NO9	0	64.8	neg
neg_1657	Calystegine A6	metab_8604	0.0001094	0.0002973	1.5508	1.5444	1.3424	0.4248	yes	-	-	-	-	-	-	-	HMDB0031345	Alkaloids and derivatives	Tropane alkaloids	Not Available	177794-04-6	204.087	0.6487	M+FA-H	C7H13NO3	0	49.5	neg
neg_6949	(E)-2-Hydroxy-N-desmethyldoxepin	metab_14326	0.0005286	0.001169	1.5493	1.551	0.7743	-0.3691	yes	-	-	-	-	-	-	-	PW_C040605;HMDB0060699	Organoheterocyclic compounds	Benzoxepines	Dibenzoxepines	-	302.118	4.34105	M+Na-2H	C18H19NO2	0	39.2	neg
neg_6837	N-[4-Methoxy-5-[[4-(1-methylindol-3-yl)pyrimidin-2-yl]amino]-2-[methyl-[2-(methylamino)ethyl]amino]phenyl]prop-2-enamide	metab_14206	3.9e-06	1.81e-05	1.5435	1.5397	1.2657	0.34	yes	-	-	-	-	-	-	-	HMDB0248755	Benzenoids	Benzene and substituted derivatives	Anilides	-	506.225	4.48513	M+Na-2H	C27H31N7O2	0	46.9	neg
neg_8090	5-Isothiocyanato-1-pentene	metab_15570	0.000144	0.0003769	1.5431	1.5382	0.7916	-0.3372	yes	-	-	-	-	-	-	-	HMDB0034300	Organosulfur compounds	Isothiocyanates	Not Available	18060-79-2	172.043	3.1361	M+FA-H	C6H9NS	0	48.7	neg
pos_6079	Ile Thr Tyr	metab_5446	0.0002123	0.0005999	1.54	1.538	1.2164	0.2826	yes	-	-	-	-	-	-	-	-	-	-	-	-	396.212	2.65402	M+H	C19H29N3O6	87	0	pos
neg_5723	Nuatigenin	metab_13002	2.16e-07	1.64e-06	1.5345	1.5274	1.2393	0.3095	yes	C04715	Steroids	27-Carbon atoms	-	-	-	-	LMST01090001;HMDB0301755	Lipids and lipid-like molecules	Steroids and steroid derivatives	Furospirostanes and derivatives	6811-35-4	429.297	5.90957	M-H	C27H42O4	0	53.6	neg
neg_4199	Chymostatin	metab_11356	2.11e-06	1.08e-05	1.5302	1.5275	1.2364	0.3061	yes	C11308	-	-	-	-	-	-	HMDB0242696	Lipids and lipid-like molecules	Steroids and steroid derivatives	Vitamin D and derivatives	9076-44-2	642.278	5.17465	M+Cl	C31H41N7O6	0	74.3	neg
pos_5944	Phenylalanyl-Gamma-glutamate	metab_5298	0.001374	0.003115	1.5297	1.5292	0.8162	-0.293	yes	-	-	-	-	-	-	-	HMDB0029009	Organic acids and derivatives	Carboxylic acids and derivatives	Amino acids, peptides, and analogues	-	276.134	2.86475	M+H-H2O	C14H19N3O4	0	69.1	pos
pos_2203	N(6)-6(R,S)-lipoyl-L-lysine	metab_1295	0.002648	0.005581	1.5285	1.5329	0.8206	-0.2853	yes	-	-	-	-	-	-	-	HMDB0255285	Organoheterocyclic compounds	Dithiolanes	Lipoamides	-	376.171	2.4358	M+ACN+H	C14H26N2O3S2	0	49.1	pos
neg_6749	1-Nonadecanoyl-glycero-3-phosphoserine	metab_14110	3.36e-06	1.59e-05	1.5263	1.5197	1.2567	0.3297	yes	-	-	-	-	-	-	-	LMGP03050028;HMDB0243972	Lipids and lipid-like molecules	Glycerophospholipids	Glycerophosphoserines	-	576.269	4.61242	M+K-2H	C25H50NO9P	0	69.7	neg
neg_2980	Skimmin	metab_10028	2.64e-05	8.87e-05	1.5254	1.5244	1.307	0.3862	yes	-	-	-	-	-	-	-	HMDB0258334	Phenylpropanoids and polyketides	Coumarins and derivatives	Coumarin glycosides	-	359.055	3.30462	M+Cl	C15H16O8	0	34.4	neg
pos_4421	(9Z,12R)-12-Hydroxyoctadec-9-enoic acid	metab_3693	2.09e-05	8.1e-05	1.514	1.5108	1.2182	0.2847	yes	C08365	-	-	-	-	-	-	HMDB0034297	Lipids and lipid-like molecules	Fatty Acyls	Fatty acids and conjugates	141-22-0	281.247	5.95162	M+H-H2O	C18H34O3	46.9	0	pos
neg_1163	[(1S,3S,7R,8R,8As)-8-[2-[(4R)-4-hydroxy-6-oxooxan-2-yl]ethyl]-3,7-dimethyl-1,2,3,7,8,8a-hexahydronaphthalen-1-yl] (2R)-2-methylbutanoate	metab_8061	3.34e-07	2.34e-06	1.511	1.5046	1.2061	0.2703	yes	-	-	-	-	-	-	-	HMDB0248085	Organoheterocyclic compounds	Lactones	Delta valerolactones	-	403.249	5.71632	M-H, M+FA-H	C24H36O5	0	31.2	neg
neg_4780	Methyl-[12]-gingerdiol	metab_11982	1.02e-08	1.4e-07	1.5092	1.5037	1.2162	0.2824	yes	-	-	-	-	-	-	-	HMDB0303110	Lipids and lipid-like molecules	Fatty Acyls	Fatty alcohols	-	415.281	5.893	M+Na-2H	C24H42O4	0	48.2	neg
neg_8579	Metoprolol	metab_16103	1.32e-07	1.1e-06	1.5045	1.4987	0.8305	-0.268	yes	C07202	-	-	-	-	-	-	HMDB0001932;PW_C001291;MJDBOTE0001765	Benzenoids	Phenols	Tyrosols and derivatives	37350-58-6;51384-51-1	288.156	2.60557	M+Na-2H	C15H25NO3	0	30.4	neg
neg_5685	N-Oleoyl Phenylalanine	metab_12959	6.44e-11	2.71e-09	1.5035	1.4995	1.2016	0.265	yes	-	-	-	-	-	-	-	HMDB0062336;LMFA08020092	Organic acids and derivatives	Carboxylic acids and derivatives	Amino acids, peptides, and analogues	-	428.317	5.97257	M-H	C27H43NO3	62.3	0	neg
neg_2945	PS(20:5(5Z,8Z,11Z,14Z,17Z)/20:5(7Z,9Z,11E,13E,17Z)-3OH(5,6,15))	metab_9989	6.98e-07	4.3e-06	1.4992	1.4888	1.2074	0.2719	yes	-	-	-	-	-	-	-	HMDB0282843	Not Available	Not Available	Not Available	-	912.407	3.24812	M+K-2H	C46H70NO13P	0	69.7	neg
neg_8679	Saccharopine	metab_16211	2.53e-09	4.76e-08	1.4989	1.4932	0.826	-0.2758	yes	C00449	-	-	map01100;map00310;map01110;map00300;map01230	Metabolic pathways;Lysine degradation;Biosynthesis of secondary metabolites;Lysine biosynthesis;Biosynthesis of amino acids	Metabolism;Metabolism;Metabolism;Metabolism;Metabolism	Global and overview maps;Amino acid metabolism;Global and overview maps;Amino acid metabolism;Global and overview maps	PW_C000189;HMDB0000279	Organic acids and derivatives	Carboxylic acids and derivatives	Amino acids, peptides, and analogues	997-68-2	611.279	2.46853	2M+Hac-H	C11H20N2O6	0	44.1	neg
neg_3485	Sulfoglycolithocholate(2-)	metab_10582	1.7e-12	1.41e-10	1.4961	1.491	0.8255	-0.2767	yes	-	-	-	-	-	-	-	HMDB0062801	Lipids and lipid-like molecules	Steroids and steroid derivatives	Bile acids, alcohols and derivatives	-	512.272	3.92518	M-H	C26H43NO7S	0	49.6	neg
neg_2790	2-Acetylaminofluorene	metab_9818	5.18e-07	3.34e-06	1.4957	1.4937	1.243	0.3138	yes	C02778	-	-	-	-	-	-	HMDB0244967	Benzenoids	Fluorenes	Not Available	-	668.29	3.07962	3M-H	C15H13NO	0	78.9	neg
neg_3398	Taurohyocholate	metab_10485	4.38e-05	0.0001352	1.4893	1.4874	0.8088	-0.3062	yes	C15516	-	-	-	-	-	-	LMST05040010;HMDB0011637	Lipids and lipid-like molecules	Steroids and steroid derivatives	Bile acids, alcohols and derivatives	117997-17-8	560.294	3.809	M+FA-H	C26H45NO7S	0	48.5	neg
neg_2063	3',5'-Cyclic GMP	metab_9026	6.58e-07	4.1e-06	1.4879	1.483	1.2513	0.3235	yes	C00942	Nucleic acids	Cyclic nucleotides	map01100;map00230;map04976;map04970;map04540;map04714;map04270;map04921;map04713;map04923;map04925;map04924;map04022;map04740;map04730;map04744;map04611	Metabolic pathways;Purine metabolism;Bile secretion;Salivary secretion;Gap junction;Thermogenesis;Vascular smooth muscle contraction;Oxytocin signaling pathway;Circadian entrainment;Regulation of lipolysis in adipocytes;Aldosterone synthesis and secretion;Renin secretion;cGMP-PKG signaling pathway;Olfactory transduction;Long-term depression;Phototransduction;Platelet activation	Metabolism;Metabolism;Organismal Systems;Organismal Systems;Cellular Processes;Organismal Systems;Organismal Systems;Organismal Systems;Organismal Systems;Organismal Systems;Organismal Systems;Organismal Systems;Environmental Information Processing;Organismal Systems;Organismal Systems;Organismal Systems;Organismal Systems	Global and overview maps;Nucleotide metabolism;Digestive system;Digestive system;Cellular community - eukaryotes;Environmental adaptation;Circulatory system;Endocrine system;Environmental adaptation;Endocrine system;Endocrine system;Endocrine system;Signal transduction;Sensory system;Nervous system;Sensory system;Immune system	HMDB0001314	Nucleosides, nucleotides, and analogues	Purine nucleotides	Cyclic purine nucleotides	7665-99-8	344.04	1.88347	M-H	C10H12N5O7P	42.1	0	neg
neg_7196	Preladenant	metab_14591	1.84e-05	6.55e-05	1.4872	1.4853	0.8251	-0.2774	yes	-	-	-	-	-	-	-	HMDB0256760	Organoheterocyclic compounds	Diazinanes	Piperazines	-	548.236	4.06103	M+FA-H	C25H29N9O3	0	38.2	neg
neg_8745	1-Methylguanosine	metab_16285	2.27e-08	2.67e-07	1.4863	1.4798	0.8029	-0.3167	yes	C04545	-	-	-	-	-	-	HMDB0001563	Nucleosides, nucleotides, and analogues	Purine nucleosides	Not Available	2140-65-0	296.1	2.38802	M-H	C11H15N5O5	35.8	0	neg
neg_4703	Naproxen	metab_11904	6.14e-07	3.86e-06	1.483	1.4793	1.2234	0.2909	yes	C01517	-	-	-	-	-	-	HMDB0001923;PW_C001282;MJDBOTE0000494	Benzenoids	Naphthalenes	Not Available	22204-53-1	505.19	5.74812	2M+FA-H	C14H14O3	0	61.3	neg
neg_4193	26-Deoxyactein	metab_11350	2.91e-08	3.26e-07	1.4785	1.4717	1.2134	0.279	yes	-	-	-	-	-	-	-	HMDB0245709	Lipids and lipid-like molecules	Steroids and steroid derivatives	Cycloartanols and derivatives	-	705.383	5.15115	M+FA-H	C37H56O10	0	39	neg
neg_3973	Gentamicin C	metab_11108	2.84e-08	3.21e-07	1.4782	1.4725	0.828	-0.2724	yes	C01918	Antibiotics	Aminoglycosides	-	-	-	-	HMDB0252688	Organic oxygen compounds	Organooxygen compounds	Carbohydrates and carbohydrate conjugates	11097-82-8	470.262	4.66198	M+Na-2H	C19H39N5O7	0	59.8	neg
neg_6745	Hordatine A	metab_14106	5.93e-05	0.0001762	1.4773	1.4739	0.8196	-0.287	yes	C08307	-	-	map01100;map01110;map00999	Metabolic pathways;Biosynthesis of secondary metabolites;Biosynthesis of various plant secondary metabolites	Metabolism;Metabolism;Metabolism	Global and overview maps;Global and overview maps;Biosynthesis of other secondary metabolites	HMDB0030461	Phenylpropanoids and polyketides	2-arylbenzofuran flavonoids	Not Available	7073-64-5	587.269	4.61797	M+Na-2H	C28H38N8O5	0	71.8	neg
neg_9290	Cyclo(his-pro)	metab_16873	1.02e-09	2.29e-08	1.4758	1.4709	0.7834	-0.3521	yes	-	-	-	-	-	-	-	HMDB0002053;HMDB0250630	Organic acids and derivatives	Carboxylic acids and derivatives	Amino acids, peptides, and analogues	53109-32-3	233.104	1.6038	M-H	C11H14N4O2	0	30.9	neg
neg_4697	MG(0:0/20:3(11Z,14Z,17Z)/0:0)	metab_11897	2.32e-06	1.17e-05	1.4739	1.4663	1.2553	0.328	yes	-	-	-	-	-	-	-	HMDB0011545	Lipids and lipid-like molecules	Endocannabinoids	Not Available	-	361.275	5.74015	M-H2O-H	C23H40O4	0	44.7	neg
neg_7791	N-(furan-2-ylmethyl)-1H-pyrazolo[3,4-d]pyrimidin-4-amine	metab_15241	1.34e-07	1.11e-06	1.4671	1.4635	0.7877	-0.3443	yes	-	-	-	-	-	-	-	-	-	-	-	-	214.073	3.43382	M-H	C10H9N5O	52.4	0	neg
neg_8676	Glutaminylisoleucine	metab_16208	6.87e-11	2.84e-09	1.4663	1.4607	0.831	-0.267	yes	-	-	-	-	-	-	-	HMDB0028800	Organic acids and derivatives	Carboxylic acids and derivatives	Amino acids, peptides, and analogues	86416-45-7	258.146	2.47653	M-H	C11H21N3O4	0	46.4	neg
neg_4235	Glycyllysylarginine	metab_11397	6.3e-08	6.09e-07	1.4661	1.4622	1.2188	0.2854	yes	-	-	-	-	-	-	-	HMDB0252886	Organic acids and derivatives	Carboxylic acids and derivatives	Amino acids, peptides, and analogues	-	394.198	5.23035	M+Cl	C14H29N7O4	0	36.6	neg
neg_2643	Gamma-Glutamyltryptophan	metab_9656	1.21e-06	6.88e-06	1.4661	1.4612	0.8257	-0.2763	yes	-	-	-	-	-	-	-	HMDB0252908;HMDB0029160	Organic acids and derivatives	Carboxylic acids and derivatives	Amino acids, peptides, and analogues	66471-20-3	332.125	2.90288	M-H	C16H19N3O5	0	46	neg
neg_6816	Suloctidil	metab_14183	0.0003679	0.0008515	1.46	1.4615	0.7896	-0.3409	yes	-	-	-	-	-	-	-	HMDB0242578	Benzenoids	Benzene and substituted derivatives	Phenylpropanes	-	372.214	4.5174	M+Cl	C20H35NOS	0	37.3	neg
neg_9438	Gamma-Glutamylvaline	metab_17023	2.93e-05	9.67e-05	1.4581	1.4567	0.8308	-0.2674	yes	-	-	-	-	-	-	-	HMDB0011172	Organic acids and derivatives	Carboxylic acids and derivatives	Amino acids, peptides, and analogues	2746-34-1	245.114	1.12823	M-H	C10H18N2O5	0	35.4	neg
neg_8907	Cytosine deoxyribonucleoside	metab_16464	1.07e-07	9.25e-07	1.4569	1.4486	1.2238	0.2914	yes	C00881	Nucleic acids	Nucleosides	map00240;map01100;map02010;map01232	Pyrimidine metabolism;Metabolic pathways;ABC transporters;Nucleotide metabolism	Metabolism;Metabolism;Environmental Information Processing;Metabolism	Nucleotide metabolism;Global and overview maps;Membrane transport;Global and overview maps	HMDB0000014;HMDB0250725	Nucleosides, nucleotides, and analogues	Pyrimidine nucleosides	Pyrimidine 2''-deoxyribonucleosides	951-77-9	453.174	2.23612	2M-H	C9H13N3O4	0	32.4	neg
neg_3214	Senecionine N-oxide	metab_10285	2.42e-09	4.58e-08	1.4567	1.4507	0.8272	-0.2736	yes	C15612	-	-	map00960;map01110	Tropane, piperidine and pyridine alkaloid biosynthesis;Biosynthesis of secondary metabolites	Metabolism;Metabolism	Biosynthesis of other secondary metabolites;Global and overview maps	HMDB0258230	Alkaloids and derivatives	Not Available	Not Available	-	747.331	3.57782	2M+FA-H	C18H25NO6	0	56.9	neg
neg_7568	Subaphylline	metab_15000	0.001957	0.003716	1.451	1.4532	0.7749	-0.3679	yes	C10497	-	-	map01100;map00330	Metabolic pathways;Arginine and proline metabolism	Metabolism;Metabolism	Global and overview maps;Amino acid metabolism	HMDB0033463	Phenylpropanoids and polyketides	Cinnamic acids and derivatives	Hydroxycinnamic acids and derivatives	501-13-3	573.289	3.64232	2M+FA-H	C14H20N2O3	0	61	neg
neg_9744	Valylglutamic acid	metab_17328	9.07e-06	3.59e-05	1.4464	1.4435	0.8237	-0.2797	yes	-	-	-	-	-	-	-	HMDB0029126	Organic acids and derivatives	Carboxylic acids and derivatives	Amino acids, peptides, and analogues	3062-07-05	245.114	0.640783	M-H	C10H18N2O5	0	44.6	neg
neg_8871	Carboquone	metab_16425	0.003437	0.006122	1.4412	1.4545	0.7854	-0.3485	yes	-	-	-	-	-	-	-	HMDB0249646	Organic oxygen compounds	Organooxygen compounds	Carbonyl compounds	-	366.131	2.25203	M+FA-H	C15H19N3O5	0	45	neg
neg_810	Glaucarubolone 15-O-beta-D-glucopyranoside	metab_15581	0.001343	0.002651	1.4402	1.4546	1.2793	0.3554	yes	-	-	-	-	-	-	-	HMDB0035036	Lipids and lipid-like molecules	Prenol lipids	Terpene lactones	89202-76-6	555.21	3.91818	M-H, M+FA-H	C26H36O13	0	73	neg
neg_9931	Citrulline	metab_17526	3.69e-09	6.47e-08	1.4399	1.4361	0.8226	-0.2818	yes	C00327	Peptides	Amino acids	map01100;map00220;map01110;map01230	Metabolic pathways;Arginine biosynthesis;Biosynthesis of secondary metabolites;Biosynthesis of amino acids	Metabolism;Metabolism;Metabolism;Metabolism	Global and overview maps;Amino acid metabolism;Global and overview maps;Global and overview maps	HMDB0000904;PW_C000723;MJDBOTE0000481	Organic acids and derivatives	Carboxylic acids and derivatives	Amino acids, peptides, and analogues	372-75-8	174.088	0.576333	M-H	C6H13N3O3	89	0	neg
neg_7725	PA(20:4(8Z,11Z,14Z,17Z)-2OH(5S,6R)/12:0)	metab_15171	2.89e-08	3.25e-07	1.425	1.4186	0.8289	-0.2707	yes	-	-	-	-	-	-	-	HMDB0262821	Not Available	Not Available	Not Available	-	709.352	3.49782	M+K-2H	C35H61O10P	0	33.9	neg
neg_3734	Dipivefrin	metab_10851	0.00434	0.007525	1.4238	1.4301	0.7806	-0.3573	yes	C06963	-	-	-	-	-	-	HMDB0014592	Benzenoids	Phenol esters	Not Available	52365-63-6	372.177	4.27705	M+Na-2H	C19H29NO5	0	32.1	neg
neg_1915	(1R,2S,3R)-2-Acetyl-4(5)-(1,2,3,4-tetrahydroxybutyl)imidazole	metab_8868	0.0279	0.03965	1.4121	1.4339	0.7518	-0.4115	yes	-	-	-	-	-	-	-	HMDB0029756	Organic oxygen compounds	Organooxygen compounds	Carbonyl compounds	94944-70-4	275.088	1.47718	M+FA-H	C9H14N2O5	0	31.1	neg
neg_4039	Sobetirome	metab_11181	3.99e-07	2.71e-06	1.4044	1.4006	0.8271	-0.2739	yes	C15618	-	-	-	-	-	-	HMDB0258355	Benzenoids	Benzene and substituted derivatives	Diphenylmethanes	211110-63-3	365.113	4.79413	M+K-2H	C20H24O4	0	41.6	neg
neg_6437	Indeloxazine	metab_13766	4.13e-06	1.9e-05	1.4031	1.3993	0.8235	-0.2802	yes	C10918	-	-	-	-	-	-	HMDB0253450	Benzenoids	Indenes and isoindenes	Not Available	60929-23-9	461.241	5.22385	2M-H	C14H17NO2	0	64.5	neg
neg_4550	(3b,20R,22R)-3,20,27-Trihydroxy-1-oxowitha-5,24-dienolide 3-glucoside	metab_11743	1.38e-07	1.14e-06	1.3993	1.3954	0.8315	-0.2662	yes	-	-	-	-	-	-	-	HMDB0033573	Lipids and lipid-like molecules	Prenol lipids	Terpene glycosides	227179-09-1	615.318	5.62038	M-H2O-H	C34H50O11	0	51.7	neg
neg_7863	Imidaprilat	metab_15321	1.6e-05	5.8e-05	1.3875	1.3842	0.8291	-0.2703	yes	C21519	-	-	-	-	-	-	HMDB0041908;HMDB0244459	Organic acids and derivatives	Carboxylic acids and derivatives	Amino acids, peptides, and analogues	89371-44-8	422.157	3.35325	M+FA-H	C18H23N3O6	0	66.8	neg
neg_2635	Methyl N-({(2s,3s)-3-[(Propylamino)carbonyl]oxiran-2-Yl}carbonyl)-L-Isoleucyl-L-Prolinate	metab_9647	0.003766	0.006649	1.3713	1.3736	1.2968	0.375	yes	-	-	-	-	-	-	-	HMDB0249521	Organic acids and derivatives	Carboxylic acids and derivatives	Amino acids, peptides, and analogues	-	418.194	2.89488	M+Na-2H	C19H31N3O6	0	35.3	neg
neg_4826	3alpha,7beta-dihydroxy-5beta-cholest-24-en-26-oic Acid	metab_12033	0.0001216	0.0003261	1.3567	1.351	1.2448	0.3159	yes	-	-	-	-	-	-	-	HMDB0062712;LMST04030142	Lipids and lipid-like molecules	Steroids and steroid derivatives	Bile acids, alcohols and derivatives	-	431.313	5.99065	M-H	C27H44O4	0	39.7	neg
neg_7574	Dehydroxymethylepoxyquinomicin	metab_15007	1.95e-07	1.5e-06	1.3437	1.3391	1.2186	0.2852	yes	-	-	-	-	-	-	-	HMDB0251110	Benzenoids	Benzene and substituted derivatives	Benzoic acids and derivatives	-	242.047	3.64232	M-H2O-H	C13H11NO5	0	34.4	neg
neg_4312	3-Fluorophenmetrazine	metab_11483	0.01271	0.01965	1.3396	1.3638	0.7997	-0.3225	yes	-	-	-	-	-	-	-	HMDB0244559	Organoheterocyclic compounds	Oxazinanes	Morpholines	-	435.21	5.36468	2M+FA-H	C11H14FNO	0	30.2	neg
neg_7325	Benzenebutanesulfonic acid, 3-phenoxy-alpha-phosphono-, (alphaS)-	metab_14734	0.0004404	0.001001	1.3385	1.334	1.2339	0.3032	yes	-	-	-	-	-	-	-	HMDB0244709	Benzenoids	Benzene and substituted derivatives	Diphenylethers	-	431.059	3.91818	M+FA-H	C16H19O7PS	0	38	neg
neg_7530	Glu Val Ile Glu	metab_14959	0.02198	0.03196	1.3372	1.3723	0.7787	-0.3609	yes	-	-	-	-	-	-	-	-	-	-	-	-	487.241	3.6895	M-H	C21H36N4O9	49.1	0	neg
neg_3326	Glutathione peroxide	metab_10406	0.001642	0.003175	1.3371	1.3287	1.2451	0.3163	yes	-	-	-	-	-	-	-	HMDB0252820	Organic acids and derivatives	Carboxylic acids and derivatives	Amino acids, peptides, and analogues	-	372.025	3.713	M+Cl	C10H15N3O8S	0	39.5	neg
neg_3157	2,8-Quinolinediol	metab_10223	4.42e-08	4.58e-07	1.3305	1.3288	1.2072	0.2717	yes	C06342	-	-	-	-	-	-	HMDB0240311	Organoheterocyclic compounds	Quinolines and derivatives	Quinolones and derivatives	15450-76-7	206.045	3.52178	M+FA-H	C9H7NO2	0	60.1	neg
neg_10269	Glycyl-Lysine	metab_7816	5.5e-10	1.45e-08	1.3268	1.3216	0.8219	-0.283	yes	-	-	-	-	-	-	-	HMDB0028846	Organic acids and derivatives	Carboxylic acids and derivatives	Amino acids, peptides, and analogues	-	202.119	0.464017	M-H	C8H17N3O3	0	35.6	neg
neg_2941	Coutaric acid	metab_9985	0.0007018	0.001501	1.3196	1.3151	1.2388	0.309	yes	C01327	-	-	map04742;map04974	Taste transduction;Protein digestion and absorption	Organismal Systems;Organismal Systems	Sensory system;Digestive system	HMDB0029225	Benzenoids	Benzene and substituted derivatives	Benzoic acids and derivatives	-	394.198	3.24812	M+FA-H	C18H27N3O4	0	56.8	neg
neg_7201	Cyclic 3-Hydroxymelatonin	metab_14598	0.004121	0.007187	1.2723	1.2856	0.8211	-0.2844	yes	-	-	-	-	-	-	-	HMDB0060069	Organoheterocyclic compounds	Indoles and derivatives	Pyrroloindoles	-	293.114	4.05303	M+FA-H	C13H16N2O3	0	44.9	neg
neg_1903	8-Hydroxyguanine	metab_8856	0.005451	0.00919	1.129	1.121	1.2034	0.2671	yes	C20155	-	-	-	-	-	-	HMDB0002032	Organoheterocyclic compounds	Imidazopyrimidines	Purines and purine derivatives	5614-64-2	166.036	1.41392	M-H	C5H5N5O2	0	39.7	neg
