# Supplementary material for: The microbiome- and metabolome-modulating activity of dietary cholesterol: insights from the small and large intestines
Source: Royal Society of Chemistry journal article supplement (doi:10.1039/d4fo03049d), 2025-01-01
Supplement: d4fo03049d5.xlsx [file d4fo03049d5.xlsx]

## Sheet: Supplementary Table S5
Table S5. Metabolites Significantly Altered in eSI_05 and eLI_05 Groups Based on Metabolomics
ID	Metabolite	P_value	FDR	VIP_pred_OPLS-DA	VIP_PLS-DA	FC(eLI_05/eSI_05)	Log2FC(eLI_05/eSI_05)	Significant	KEGG Compound ID	KEGG Compound First Category	KEGG Compound Second Category	KEGG Pathway ID	KEGG Pathway Description	KEGG Pathway First Category	KEGG Pathway Second Category	Library ID	HMDB Superclass	HMDB Class	HMDB Subclass	CAS ID	M/Z	Retention time	Adducts	Formula	Fragmentation Score	Theoretical Fragmentation Score	Metab ID	Mode
pos_6126	Canesceol	6.93e-07	3.64e-06	3.3144	3.3117	0.1777	-2.4927	yes	-	-	-	-	-	-	-	HMDB0034084	Lipids and lipid-like molecules	Steroids and steroid derivatives	Steroid lactones	82228-15-7	586.318	2.58367	M+NH4	C29H44O11	0	47.1	metab_5498	pos
pos_5954	Glycyl-proline-1-naphthylamide	2.12e-15	6.09e-13	3.168	3.1676	0.2752	-1.8613	yes	-	-	-	-	-	-	-	HMDB0252835	Organic acids and derivatives	Carboxylic acids and derivatives	Amino acids, peptides, and analogues	-	612.334	2.84918	2M+NH4	C17H19N3O2	0	58.1	metab_5309	pos
pos_7055	Kyotorphin	2.83e-06	1.21e-05	3.0889	3.0852	0.1653	-2.5969	yes	C02993	-	-	-	-	-	-	HMDB0029099;HMDB0005768	Organic acids and derivatives	Carboxylic acids and derivatives	Amino acids, peptides, and analogues	70904-56-2	338.182	1.66472	M+H	C15H23N5O4	0	55.5	metab_6490	pos
pos_1927	Polyporusterone C	4.31e-09	6.02e-08	2.8616	2.8596	0.4064	-1.299	yes	-	-	-	-	-	-	-	HMDB0038497	Lipids and lipid-like molecules	Steroids and steroid derivatives	Cholestane steroids	141360-90-9	521.281	1.97592	M+2Na-H	C28H44O6	0	54.3	metab_997	pos
neg_6607	Mesaconitine	8.69e-18	9.43e-15	2.8379	2.8371	0.0004	-11.3794	yes	C08698	-	-	-	-	-	-	HMDB0254473	Lipids and lipid-like molecules	Prenol lipids	Diterpenoids	2752-64-9	676.295	4.86122	M+FA-H	C33H45NO11	0	54.8	metab_13954	neg
neg_7040	PC(2:0/5-iso PGF2VI)	7.56e-21	7.38e-17	2.7827	2.782	0.0775	-3.689	yes	-	-	-	-	-	-	-	HMDB0288846	Not Available	Not Available	Not Available	-	588.289	4.22905	M-H2O-H	C28H50NO11P	0	68.4	metab_14425	neg
pos_1288	Glabrin C	6.75e-05	0.0001919	2.7673	2.7625	0.375	-1.4152	yes	-	-	-	-	-	-	-	HMDB0033612	Organic acids and derivatives	Carboxylic acids and derivatives	Amino acids, peptides, and analogues	-	429.232	1.89077	M+2Na+H, M+2Na	C41H64N8O9	0	87.3	metab_316	pos
pos_397	N,N,O-Tridesmethylvenlafaxine	4.3e-05	0.0001283	2.7334	2.7291	0.4105	-1.2845	yes	-	-	-	-	-	-	-	PW_C040613;HMDB0061345	Organic oxygen compounds	Organooxygen compounds	Alcohols and polyols	149289-29-2	258.145	0.623083	M+H-2H2O, M+Na	C14H21NO2	0	37.5	metab_3197	pos
pos_5891	Etelcalcetide	0.0009285	0.001991	2.7297	2.7241	0.3749	-1.4154	yes	-	-	-	-	-	-	-	HMDB0251992	Organic acids and derivatives	Carboxylic acids and derivatives	Amino acids, peptides, and analogues	-	524.774	2.94282	M+2H	C38H73N21O10S2	0	50.7	metab_5243	pos
neg_3398	Taurohyocholate	9.07e-07	2.97e-06	2.7065	2.6998	0.1079	-3.2117	yes	C15516	-	-	-	-	-	-	LMST05040010;HMDB0011637	Lipids and lipid-like molecules	Steroids and steroid derivatives	Bile acids, alcohols and derivatives	117997-17-8	560.294	3.809	M+FA-H	C26H45NO7S	0	48.5	metab_10485	neg
neg_6600	Prednisone	2.31e-15	3.73e-13	2.6523	2.6516	0.237	-2.0769	yes	C07370	-	-	-	-	-	-	PW_C009120;LMST02030180;HMDB0014773;MJDBOTE0001633	Lipids and lipid-like molecules	Steroids and steroid derivatives	Hydroxysteroids	1953-03-02	393.145	4.87533	M+Cl	C21H26O5	0	59.9	metab_13947	neg
pos_1821	Trans-Zeatin-O-glucoside riboside	2.62e-12	1.64e-10	2.6412	2.6406	2.3033	1.2037	yes	-	-	-	-	-	-	-	HMDB0032880	Benzenoids	Naphthalenes	Naphthalene sulfonic acids and derivatives	62512-97-4	555.24	1.8675	M+ACN+H	C21H31N5O10	0	34.9	metab_887	pos
pos_2271	Pro Phe	1.87e-05	6.21e-05	2.6217	2.6236	0.5222	-0.9373	yes	-	-	-	-	-	-	-	-	-	-	-	-	263.139	2.56812	M+H	C14H18N2O3	59.7	0	metab_1367	pos
pos_5872	Pro Trp	9.96e-18	1.43e-14	2.6061	2.6057	0.4507	-1.1498	yes	-	-	-	-	-	-	-	-	-	-	-	-	302.149	2.96622	M+H	C16H19N3O3	50.2	0	metab_5222	pos
pos_6233	Esculeoside A	1.09e-10	3.1e-09	2.5725	2.572	0.5263	-0.926	yes	-	-	-	-	-	-	-	HMDB0251947	Lipids and lipid-like molecules	Steroids and steroid derivatives	Steroidal glycosides	-	635.803	2.4358	M+2H	C58H95NO29	0	90.5	metab_5615	pos
neg_3364	Gibberellin A51-catabolite	3.2e-10	4.15e-09	2.5225	2.5232	0.1629	-2.6184	yes	C11854	-	-	map01110;map00904	Biosynthesis of secondary metabolites;Diterpenoid biosynthesis	Metabolism;Metabolism	Global and overview maps;Metabolism of terpenoids and polyketides	HMDB0304363;LMPR0104170011	Lipids and lipid-like molecules	Prenol lipids	Diterpenoids	-	365.113	3.76898	M+Cl	C19H22O5	0	37.1	metab_10448	neg
pos_7074	S-(2-Methylbutanoyl)-dihydrolipoamide	4.09e-09	5.84e-08	2.5161	2.5144	0.5239	-0.9328	yes	C05118	-	-	-	-	-	-	PW_C002980;HMDB0006869	Lipids and lipid-like molecules	Fatty Acyls	Fatty acyl thioesters	-	274.13	1.61812	M+H-H2O	C13H25NO2S2	0	48.7	metab_6510	pos
neg_7855	AFN911	1.2e-07	5.36e-07	2.4899	2.4859	0.2032	-2.2993	yes	-	-	-	-	-	-	-	HMDB0013863	Organoheterocyclic compounds	Diazines	Pyrimidines and pyrimidine derivatives	-	546.242	3.36123	M+Cl	C29H33N7O2	0	82.9	metab_15312	neg
neg_4047	Bmn-673 8R,9S	8.37e-14	6.39e-12	2.4632	2.4627	0.2176	-2.2001	yes	-	-	-	-	-	-	-	HMDB0244463	Organoheterocyclic compounds	Quinolines and derivatives	Phenylquinolines	-	425.117	4.81178	M+FA-H	C19H14F2N6O	0	58.9	metab_11190	neg
neg_1611	Lacto-N-biose I	6.71e-14	5.42e-12	2.432	2.4313	0.4177	-1.2596	yes	C06372	Carbohydrates	Oligosaccharides	-	-	-	-	HMDB0006575;HMDB0252594	Organic oxygen compounds	Organooxygen compounds	Carbohydrates and carbohydrate conjugates	50787-09-2	418.112	0.616867	M+Cl	C14H25NO11	0	47	metab_8554	neg
pos_5760	Val Trp	1.23e-06	5.89e-06	2.4095	2.4089	0.5056	-0.984	yes	-	-	-	-	-	-	-	-	-	-	-	-	304.165	3.19252	M+H	C16H21N3O3	76.9	0	metab_5107	pos
pos_5907	Merodesmosine	1.16e-09	2.12e-08	2.39	2.3896	0.6187	-0.6928	yes	-	-	-	-	-	-	-	HMDB0030407	Organic acids and derivatives	Carboxylic acids and derivatives	Amino acids, peptides, and analogues	17096-97-8	385.244	2.92718	M+H-H2O	C18H34N4O6	0	63.7	metab_5261	pos
pos_5962	N-hydroxy-L-tryptophan	8.99e-08	6.92e-07	2.3829	2.382	0.5561	-0.8466	yes	C19716	-	-	-	-	-	-	HMDB0255152	Organoheterocyclic compounds	Indoles and derivatives	Indolyl carboxylic acids and derivatives	-	262.118	2.83355	M+ACN+H	C11H12N2O3	0	60.2	metab_5318	pos
pos_2127	Paroxetine	1.71e-12	1.15e-10	2.3809	2.3806	1.8544	0.8909	yes	C07415	-	-	-	-	-	-	HMDB0014853	Organoheterocyclic compounds	Piperidines	Phenylpiperidines	61869-08-7	330.148	2.31075	M+H	C19H20FNO3	53.7	0	metab_1212	pos
pos_6116	7-Oxociguatoxin	6.69e-08	5.48e-07	2.3739	2.3734	0.6542	-0.6121	yes	-	-	-	-	-	-	-	HMDB0039389	Phenylpropanoids and polyketides	Ciguatera toxins	Not Available	263336-55-6	575.28	2.59925	M+H+Na	C60H86O20	0	83.6	metab_5488	pos
pos_7105	Fluocinolone	1.15e-07	8.46e-07	2.3664	2.3662	0.56	-0.8366	yes	C07006	-	-	-	-	-	-	HMDB0252347	Lipids and lipid-like molecules	Steroids and steroid derivatives	Hydroxysteroids	807-38-5	445.203	1.39532	M+CH3OH+H	C21H26F2O6	0	45.1	metab_6541	pos
pos_2065	Bezitramide	9.09e-09	1.08e-07	2.3638	2.3634	0.6027	-0.7306	yes	-	-	-	-	-	-	-	HMDB0249171	Benzenoids	Benzene and substituted derivatives	Diphenylacetonitriles	-	506.259	2.2094	2M+3H2O+2H	C31H32N4O2	0	55.7	metab_1144	pos
pos_1785	6-Dimethylaminopurine	8.02e-10	1.53e-08	2.3635	2.3634	0.5643	-0.8256	yes	-	-	-	-	-	-	-	HMDB0000473	Organoheterocyclic compounds	Imidazopyrimidines	Purines and purine derivatives	938-55-6	164.093	1.8051	M+H	C7H9N5	54.1	0	metab_846	pos
pos_6189	Ent-6R,16bOH,17-Trihydroxy-7-oxo-6,7-seco-19,6-kauranolide 6-O-glucoside	7.53e-08	6.02e-07	2.3599	2.3615	0.6053	-0.7242	yes	-	-	-	-	-	-	-	HMDB0038546	Lipids and lipid-like molecules	Prenol lipids	Terpene glycosides	132242-50-3	592.272	2.48227	M+ACN+Na	C26H40O11	0	68.8	metab_5565	pos
neg_6050	N2-Maltulosylarginine	4.74e-08	2.48e-07	2.3389	2.3407	0.1766	-2.5012	yes	-	-	-	-	-	-	-	HMDB0041542	Lipids and lipid-like molecules	Saccharolipids	Not Available	162966-06-5	479.197	5.62038	M-H2O-H	C18H34N4O12	0	43.9	metab_13349	neg
pos_6123	CDP-DG(20:1(11Z)/20:5(5Z,8Z,11Z,14Z,16E)-OH(18R))	1.93e-07	1.28e-06	2.3357	2.3368	0.6201	-0.6893	yes	-	-	-	-	-	-	-	HMDB0291759	Not Available	Not Available	Not Available	-	546.769	2.59143	M+H+Na	C52H85N3O16P2	0	67.1	metab_5495	pos
pos_1652	1-Methyladenine	3.6e-11	1.3e-09	2.3181	2.3172	0.61	-0.7132	yes	C02216	-	-	-	-	-	-	HMDB0011599	Organoheterocyclic compounds	Imidazopyrimidines	Purines and purine derivatives	5142-22-3	150.077	1.58717	M+H	C6H7N5	0	47.4	metab_705	pos
pos_1165	Gly Leu Arg	2.42e-07	1.54e-06	2.2904	2.2875	0.6051	-0.7248	yes	-	-	-	-	-	-	-	-	-	-	-	-	345.224	1.67255	M+2H, M+H	C14H28N6O4	70.7	0	metab_180	pos
pos_2110	CDP-DG(PGD2/i-19:0)	3.54e-08	3.23e-07	2.2863	2.2864	1.5793	0.6593	yes	-	-	-	-	-	-	-	HMDB0294013	Not Available	Not Available	Not Available	-	568.764	2.28742	M+2Na	C51H87N3O18P2	0	45.4	metab_1194	pos
pos_2916	5-Hydroxylysinonorleucine	8.48e-10	1.6e-08	2.276	2.2757	0.6212	-0.6868	yes	-	-	-	-	-	-	-	HMDB0246805	Organic acids and derivatives	Carboxylic acids and derivatives	Amino acids, peptides, and analogues	-	621.323	4.5503	2M+K	C12H25N3O5	0	52.3	metab_2044	pos
pos_4818	Opiorphin	1.75e-05	5.87e-05	2.2676	2.2715	0.5799	-0.7862	yes	-	-	-	-	-	-	-	HMDB0059792	Organic acids and derivatives	Carboxylic acids and derivatives	Amino acids, peptides, and analogues	-	734.408	5.55063	M+ACN+H	C29H48N12O8	0	66.8	metab_4125	pos
neg_4187	Arginylphenylalanine	6.48e-06	1.63e-05	2.2669	2.2622	0.3548	-1.4948	yes	-	-	-	-	-	-	-	HMDB0028716	Organic acids and derivatives	Carboxylic acids and derivatives	Amino acids, peptides, and analogues	2047-13-4	641.351	5.14457	2M-H	C15H23N5O3	0	81	metab_11343	neg
pos_5912	Assamsaponin F	2.46e-15	6.79e-13	2.2668	2.2665	0.6513	-0.6187	yes	-	-	-	-	-	-	-	HMDB0036480	Lipids and lipid-like molecules	Prenol lipids	Terpene glycosides	316157-15-0	652.298	2.91938	M+2H	C62H94O29	0	81.8	metab_5267	pos
neg_6795	Cilastatin	3.98e-05	8.1e-05	2.2602	2.2542	0.3754	-1.4136	yes	C01675	-	-	-	-	-	-	HMDB0015535;HMDB0247784;MJDBOTE0001591	Organic acids and derivatives	Carboxylic acids and derivatives	Amino acids, peptides, and analogues	82009-34-5	379.129	4.5414	M+Na-2H	C16H26N2O5S	0	48.2	metab_14160	neg
pos_1491	Prolylhydroxyproline	0.0001796	0.0004586	2.2578	2.2553	0.5923	-0.7555	yes	-	-	-	-	-	-	-	HMDB0256781;HMDB0006695	Organic acids and derivatives	Carboxylic acids and derivatives	Amino acids, peptides, and analogues	18684-24-7	229.118	0.8491	M+H	C10H16N2O4	61.5	0	metab_535	pos
pos_2479	PA(18:4(6Z,9Z,12Z,15Z)/14:1(9Z))	1.93e-14	3.07e-12	2.2563	2.256	0.6573	-0.6054	yes	C00416	Lipids	Phospholipids	map01100;map00564;map01110;map00561;map05212;map05200;map04975;map04024;map05231;map04072;map04912;map04070;map04666	Metabolic pathways;Glycerophospholipid metabolism;Biosynthesis of secondary metabolites;Glycerolipid metabolism;Pancreatic cancer;Pathways in cancer;Fat digestion and absorption;cAMP signaling pathway;Choline metabolism in cancer;Phospholipase D signaling pathway;GnRH signaling pathway;Phosphatidylinositol signaling system;Fc gamma R-mediated phagocytosis	Metabolism;Metabolism;Metabolism;Metabolism;Human Diseases;Human Diseases;Organismal Systems;Environmental Information Processing;Human Diseases;Environmental Information Processing;Organismal Systems;Environmental Information Processing;Organismal Systems	Global and overview maps;Lipid metabolism;Global and overview maps;Lipid metabolism;Cancer: specific types;Cancer: overview;Digestive system;Signal transduction;Cancer: overview;Signal transduction;Endocrine system;Signal transduction;Immune system	HMDB0115028;PW_C062446;LMGP10010426	Lipids and lipid-like molecules	Glycerophospholipids	Glycerophosphates	-	683.371	2.96622	M+2Na-H	C35H59O8P	0	55.3	metab_1594	pos
pos_5942	Isofebrifugine	2.54e-06	1.1e-05	2.2549	2.2551	0.6423	-0.6387	yes	C10698	-	-	-	-	-	-	HMDB0242253;HMDB0253633	Organoheterocyclic compounds	Diazanaphthalenes	Benzodiazines	32434-44-9	644.324	2.86475	2M+ACN+H	C16H19N3O3	0	54.6	metab_5296	pos
pos_4589	N-Isobutyl-2,4,8-decatrienamide	8.92e-07	4.5e-06	2.2548	2.2572	0.5977	-0.7425	yes	-	-	-	-	-	-	-	HMDB0030188	Lipids and lipid-like molecules	Fatty Acyls	Fatty amides	52657-13-3	443.363	5.77788	2M+H	C14H23NO	0	53.1	metab_3872	pos
pos_1109	Delta-Valerolactone	2.42e-10	5.8e-09	2.2506	2.2505	1.4179	0.5037	yes	C02240	-	-	-	-	-	-	HMDB0250981	Organoheterocyclic compounds	Lactones	Delta valerolactones	542-28-9	101.06	0.623083	M+H-H2O, M+H	C5H8O2	0	46.8	metab_120	pos
pos_2277	N-Isobutyryl-L-cysteine	4.16e-15	9.93e-13	2.2495	2.2493	0.6056	-0.7236	yes	-	-	-	-	-	-	-	HMDB0255162	Organic acids and derivatives	Carboxylic acids and derivatives	Amino acids, peptides, and analogues	-	174.058	2.57593	M+H-H2O	C7H13NO3S	0	40.2	metab_1372	pos
pos_2398	Janthitrem E	1.65e-12	1.13e-10	2.249	2.2483	0.6638	-0.5911	yes	-	-	-	-	-	-	-	HMDB0030529	Organoheterocyclic compounds	Naphthopyrans	Not Available	90986-50-8	626.35	2.81802	M+Na	C37H49NO6	0	67.9	metab_1505	pos
pos_5911	Physagulin G	1.39e-16	8.33e-14	2.2487	2.2483	0.6624	-0.5943	yes	-	-	-	-	-	-	-	HMDB0039694	Lipids and lipid-like molecules	Steroids and steroid derivatives	Steroid lactones	148076-22-6	705.319	2.91938	M+H-H2O	C36H50O15	0	78	metab_5266	pos
pos_5868	Flobetair	4.14e-05	0.000124	2.2382	2.2346	0.6144	-0.7027	yes	-	-	-	-	-	-	-	HMDB0252306	Benzenoids	Benzene and substituted derivatives	Styrenes	-	743.355	2.96622	2M+Na	C20H25FN2O3	0	65.5	metab_5217	pos
pos_6390	Gly Val Val	1.77e-09	2.96e-08	2.2324	2.2324	0.6498	-0.6218	yes	-	-	-	-	-	-	-	-	-	-	-	-	274.176	2.24833	M+H	C12H23N3O4	84.7	0	metab_5786	pos
pos_2309	PIP(6 keto-PGF1alpha/18:1(11Z))	5.52e-10	1.14e-08	2.2308	2.2298	0.653	-0.615	yes	-	-	-	-	-	-	-	HMDB0278859	Not Available	Not Available	Not Available	-	516.262	2.6305	M+2H	C47H84O20P2	0	65.1	metab_1407	pos
pos_2417	Kinetin	1.98e-14	3.08e-12	2.227	2.2267	0.6121	-0.7082	yes	C08272	-	-	-	-	-	-	HMDB0012245;MJDBZSJ0000125	Organoheterocyclic compounds	Imidazopyrimidines	Purines and purine derivatives	525-79-1	216.088	2.86475	M+H	C10H9N5O	83	0	metab_1527	pos
pos_1734	Melanostatin	2.27e-09	3.64e-08	2.2246	2.2229	0.6385	-0.6472	yes	-	-	-	-	-	-	-	HMDB0005764;HMDB0254713	Organic acids and derivatives	Carboxylic acids and derivatives	Amino acids, peptides, and analogues	9083-38-9	317.218	1.75058	M+CH3OH+H	C13H24N4O3	0	40.9	metab_792	pos
pos_313	L-Lysine	5.33e-12	2.79e-10	2.2198	2.219	0.664	-0.5908	yes	C00047	Peptides	Amino acids	map01100;map00310;map00997;map00300;map01120;map01210;map00780;map00470;map01230;map04974;map01110;map02010;map00970;map00960;map01064;map01060	Metabolic pathways;Lysine degradation;Biosynthesis of various other secondary metabolites;Lysine biosynthesis;Microbial metabolism in diverse environments;2-Oxocarboxylic acid metabolism;Biotin metabolism;D-Amino acid metabolism;Biosynthesis of amino acids;Protein digestion and absorption;Biosynthesis of secondary metabolites;ABC transporters;Aminoacyl-tRNA biosynthesis;Tropane, piperidine and py…	Metabolism;Metabolism;Metabolism;Metabolism;Metabolism;Metabolism;Metabolism;Metabolism;Metabolism;Organismal Systems;Metabolism;Environmental Information Processing;Genetic Information Processing;Metabolism;Metabolism;Metabolism	Global and overview maps;Amino acid metabolism;Biosynthesis of other secondary metabolites;Amino acid metabolism;Global and overview maps;Global and overview maps;Metabolism of cofactors and vitamins;Metabolism of other amino acids;Global and overview maps;Digestive system;Global and overview maps;Membrane transport;Translation;Biosynthesis of other secondary metabolites;Chemical structure transf…	PW_C000118;HMDB0000182;HMDB0301757;MJDBOTE0000528	Organic acids and derivatives	Carboxylic acids and derivatives	Amino acids, peptides, and analogues	56-87-1;10098-89-2	147.113	0.467433	M+H-H2O, M+H	C6H14N2O2	89.5	0	metab_2275	pos
neg_9265	(E,E)-1-Chloro-3,11-tridecadiene-5,7,9-triyn-2-ol	4.16e-14	3.77e-12	2.2153	2.2149	0.3574	-1.4844	yes	-	-	-	-	-	-	-	HMDB0034007	Organohalogen compounds	Halohydrins	Chlorohydrins	-	239.026	1.68317	M+Na-2H	C13H11ClO	0	34.4	metab_16845	neg
pos_2018	Lotusine	6.87e-15	1.49e-12	2.2092	2.2089	0.6041	-0.7271	yes	C17567	-	-	-	-	-	-	HMDB0033347	Organoheterocyclic compounds	Isoquinolines and derivatives	Benzylisoquinolines	6871-67-6	315.181	2.13158	M+H	C19H24NO3+	0	44.6	metab_1094	pos
neg_6725	Corynantheine	9.66e-05	0.0001796	2.2051	2.1995	0.28	-1.8365	yes	C17872	-	-	-	-	-	-	HMDB0250477	Alkaloids and derivatives	Corynanthean-type alkaloids	Not Available	-	387.171	4.65048	M+Na-2H	C22H26N2O3	0	35.5	metab_14085	neg
pos_398	N2-gamma-Glutamylglutamine	6.21e-12	3.09e-10	2.1986	2.1987	0.6253	-0.6774	yes	C05283	-	-	-	-	-	-	HMDB0011738	Organic acids and derivatives	Carboxylic acids and derivatives	Amino acids, peptides, and analogues	10148-81-9	276.119	0.623083	M+H, M+K	C10H17N3O6	0	58.2	metab_3207	pos
pos_7437	Gly Pro Lys	1.83e-07	1.22e-06	2.1821	2.1821	0.6388	-0.6465	yes	-	-	-	-	-	-	-	-	-	-	-	-	301.187	0.623083	M+H	C13H24N4O4	71.9	0	metab_6884	pos
pos_7699	Lysyl-Lysine	1.41e-08	1.55e-07	2.1795	2.1792	0.601	-0.7346	yes	-	-	-	-	-	-	-	HMDB0304785;HMDB0028956	Organic acids and derivatives	Carboxylic acids and derivatives	Amino acids, peptides, and analogues	13184-13-9	138.107	0.436233	M+2H	C12H26N4O3	0	36.6	metab_7167	pos
pos_2401	Pyropheophorbide a	3.37e-06	1.4e-05	2.1768	2.1788	0.6097	-0.7139	yes	C18064	-	-	map01110;map00860	Biosynthesis of secondary metabolites;Porphyrin metabolism	Metabolism;Metabolism	Global and overview maps;Metabolism of cofactors and vitamins	HMDB0256993	Not Available	Not Available	Not Available	-	576.3	2.82572	M+ACN+H	C33H34N4O3	0	66.9	metab_1510	pos
pos_625	Penitrem B	4.28e-09	6e-08	2.1768	2.1747	0.677	-0.5627	yes	C20731	-	-	-	-	-	-	HMDB0242736;HMDB0256239	Organoheterocyclic compounds	Naphthopyrans	Not Available	11076-67-8	584.339	1.98375	M+2H, M+H	C37H45NO5	0	45.8	metab_5632	pos
neg_6630	Dimerum acid	3.63e-06	9.86e-06	2.1709	2.1673	0.3765	-1.4093	yes	-	-	-	-	-	-	-	HMDB0251372	Organic acids and derivatives	Carboximidic acids and derivatives	Carboximidic acids	-	465.235	4.8244	M-H2O-H	C22H36N4O8	0	60	metab_13980	neg
neg_7066	Repaglinide	4.71e-08	2.46e-07	2.1703	2.1671	0.3931	-1.3469	yes	C07670	-	-	-	-	-	-	HMDB0015048;PW_C009360;MJDBOTE0001384	Organoheterocyclic compounds	Piperidines	Phenylpiperidines	135062-02-1	487.241	4.19705	M+Cl	C27H36N2O4	0	54	metab_14451	neg
pos_7311	Hydroxyprolyl-Lysine	8.74e-15	1.77e-12	2.1699	2.1696	0.6347	-0.6559	yes	-	-	-	-	-	-	-	HMDB0028868	Organic acids and derivatives	Carboxylic acids and derivatives	Amino acids, peptides, and analogues	-	301.187	0.880333	M+ACN+H	C11H21N3O4	0	38.8	metab_6757	pos
pos_2334	Eriojaposide B	2.63e-06	1.14e-05	2.1612	2.162	0.6509	-0.6195	yes	C17889	-	-	-	-	-	-	HMDB0038029	Lipids and lipid-like molecules	Fatty Acyls	Fatty acyl glycosides	351412-97-0	558.288	2.67748	M+ACN+H	C25H40O11	0	48.3	metab_1435	pos
pos_6448	(3a,5b,7a)-23-Carboxy-7-hydroxy-24-norcholan-3-yl-b-D-Glucopyranosiduronic acid	3.7e-07	2.16e-06	2.161	2.1617	0.6617	-0.5957	yes	-	-	-	-	-	-	-	HMDB0002430;HMDB0243600	Lipids and lipid-like molecules	Steroids and steroid derivatives	Steroidal glycosides	58814-71-4	285.168	2.17822	M+2H	C30H48O10	0	52.2	metab_5849	pos
neg_2996	Bremelanotide	4.44e-15	6.57e-13	2.1494	2.1487	0.4933	-1.0196	yes	-	-	-	-	-	-	-	HMDB0249376	Organic acids and derivatives	Carboxylic acids and derivatives	Amino acids, peptides, and analogues	-	1005.5	3.31262	M-H2O-H	C50H68N14O10	0	89.8	metab_10045	neg
pos_2088	4-Aminobutyraldehyde	6.7e-12	3.25e-10	2.1481	2.148	0.5894	-0.7628	yes	C00555	-	-	map01100;map00330;map00410	Metabolic pathways;Arginine and proline metabolism;beta-Alanine metabolism	Metabolism;Metabolism;Metabolism	Global and overview maps;Amino acid metabolism;Metabolism of other amino acids	HMDB0001080	Organic oxygen compounds	Organooxygen compounds	Carbonyl compounds	4390-05-0	129.102	2.25615	M+ACN+H	C4H9NO	0	34.2	metab_7490	pos
pos_1689	Lys Ile Glu	9.29e-14	1.09e-11	2.1446	2.1443	0.6541	-0.6125	yes	-	-	-	-	-	-	-	-	-	-	-	-	389.239	1.69602	M+H	C17H32N4O6	65	0	metab_742	pos
neg_4423	Tanabalin	1.24e-10	2.03e-09	2.1381	2.1377	0.4633	-1.1098	yes	C20205	-	-	-	-	-	-	HMDB0041330	Lipids and lipid-like molecules	Prenol lipids	Terpene lactones	179094-52-1;172548-61-7	407.161	5.516	M+Cl	C22H28O5	0	36.9	metab_11604	neg
pos_2260	Ile Leu Glu	2.88e-17	2.87e-14	2.1355	2.1352	0.66	-0.5995	yes	-	-	-	-	-	-	-	-	-	-	-	-	374.228	2.54465	M+H	C17H31N3O6	79.9	0	metab_1355	pos
neg_6815	Ansamitocin P-3	7.5e-11	1.36e-09	2.1263	2.1247	0.5386	-0.8928	yes	C12045	-	-	map01052;map01051;map01110	Type I polyketide structures;Biosynthesis of ansamycins;Biosynthesis of secondary metabolites	Metabolism;Metabolism;Metabolism	Metabolism of terpenoids and polyketides;Metabolism of terpenoids and polyketides;Global and overview maps	HMDB0248452	Phenylpropanoids and polyketides	Macrolactams	Not Available	66584-72-3	655.237	4.5174	M+Na-2H	C32H43ClN2O9	0	46.4	metab_14182	neg
neg_6183	Sar-Arg-Val-Tyr-Val-His-Pro-Ala	1.29e-05	2.97e-05	2.1223	2.1176	0.4631	-1.1106	yes	-	-	-	-	-	-	-	HMDB0257488	Organic acids and derivatives	Carboxylic acids and derivatives	Amino acids, peptides, and analogues	-	956.494	5.53997	M+FA-H	C42H65N13O10	0	82.7	metab_13489	neg
pos_2211	Fluoroacetic acid	5.06e-07	2.82e-06	2.121	2.1204	0.6383	-0.6477	yes	C06108	-	-	map00983	Drug metabolism - other enzymes	Metabolism	Xenobiotics biodegradation and metabolism	HMDB0252369	Organic acids and derivatives	Carboxylic acids and derivatives	Alpha-halocarboxylic acids and derivatives	144-49-0	174.058	2.45145	2M+NH4	C2H3FO2	0	30.5	metab_1304	pos
pos_6343	Phenylalanine glutamate	4.18e-08	3.72e-07	2.1206	2.1207	0.6517	-0.6178	yes	-	-	-	-	-	-	-	HMDB0256433	Organic acids and derivatives	Carboxylic acids and derivatives	Amino acids, peptides, and analogues	-	352.15	2.30293	M+ACN+H	C14H18N2O6	0	61.4	metab_5736	pos
pos_6106	28-Glucosylarjunolate 3-[rhamnosyl-(1->3)-glucuronide]	2.61e-07	1.63e-06	2.1181	2.1179	0.6777	-0.5612	yes	-	-	-	-	-	-	-	HMDB0033580	Lipids and lipid-like molecules	Prenol lipids	Terpene glycosides	214840-33-2	498.242	2.61487	M+H+Na	C48H76O20	0	46.4	metab_5477	pos
pos_1433	4-Hydroxy-L-glutamic acid	7.79e-10	1.5e-08	2.1153	2.1145	0.6549	-0.6105	yes	C05947	-	-	map01100;map00330	Metabolic pathways;Arginine and proline metabolism	Metabolism;Metabolism	Global and overview maps;Amino acid metabolism	HMDB0002273;PW_C001535	Organic acids and derivatives	Carboxylic acids and derivatives	Amino acids, peptides, and analogues	2485-33-8	205.082	0.607633	M+ACN+H	C5H9NO5	0	57.2	metab_7491	pos
pos_1992	Tobramycin	4.16e-07	2.41e-06	2.1136	2.1107	0.6624	-0.5943	yes	C00397	-	-	map01110;map00524	Biosynthesis of secondary metabolites;Neomycin, kanamycin and gentamicin biosynthesis	Metabolism;Metabolism	Global and overview maps;Biosynthesis of other secondary metabolites	HMDB0014822;PW_C009161	Organic oxygen compounds	Organooxygen compounds	Carbohydrates and carbohydrate conjugates	32986-56-4	531.276	2.08483	M+ACN+Na	C18H37N5O9	0	74.4	metab_1067	pos
pos_5926	Glycocholenate sulfate	6.47e-11	2.04e-09	2.112	2.1115	0.7056	-0.503	yes	-	-	-	-	-	-	-	HMDB0242178	Lipids and lipid-like molecules	Steroids and steroid derivatives	Bile acids, alcohols and derivatives	-	585.287	2.88815	M+ACN+H	C26H41NO9S	0	63.3	metab_5280	pos
neg_7403	Norerythromycin	4.77e-09	3.71e-08	2.1118	2.1132	0.5825	-0.7796	yes	-	-	-	-	-	-	-	HMDB0061026	Lipids and lipid-like molecules	Steroids and steroid derivatives	Estrane steroids	-	740.395	3.83302	M+Cl	C35H63NO13	0	58	metab_14820	neg
pos_6281	Actein	1.04e-05	3.69e-05	2.1101	2.1096	1.5508	0.633	yes	-	-	-	-	-	-	-	HMDB0247977	Lipids and lipid-like molecules	Steroids and steroid derivatives	Cycloartanols and derivatives	-	350.192	2.38105	M+H+Na	C37H56O11	0	71.6	metab_5667	pos
pos_6115	Hydroxydestruxin B	2.65e-09	4.09e-08	2.1087	2.1087	1.4495	0.5356	yes	-	-	-	-	-	-	-	HMDB0040135	Organic acids and derivatives	Peptidomimetics	Depsipeptides	-	654.345	2.59925	M+2Na-H	C30H51N5O8	0	81.2	metab_5487	pos
pos_2082	Lablaboside C	3.62e-10	8.17e-09	2.1077	2.1069	0.6954	-0.5241	yes	-	-	-	-	-	-	-	HMDB0032893	Lipids and lipid-like molecules	Prenol lipids	Terpene glycosides	209802-42-6	633.314	2.24058	M+2H	C60H96O28	0	80.7	metab_1163	pos
pos_2253	4,4'-Thiobis(6-tert-butyl-m-cresol)	2.31e-13	2.4e-11	2.1074	2.1071	0.6859	-0.5439	yes	-	-	-	-	-	-	-	HMDB0247683	Organosulfur compounds	Thioethers	Aryl thioethers	-	755.356	2.52915	2M+K	C22H30O2S	0	54	metab_1347	pos
neg_4427	Calindol	4.33e-10	5.25e-09	2.1045	2.103	0.4581	-1.1263	yes	-	-	-	-	-	-	-	HMDB0249556	Benzenoids	Naphthalenes	Not Available	-	645.325	5.516	2M+FA-H	C21H20N2	0	32	metab_11608	neg
pos_7426	Alanylarginine	3.56e-08	3.24e-07	2.0979	2.097	0.6463	-0.6297	yes	-	-	-	-	-	-	-	HMDB0028681	Organic acids and derivatives	Carboxylic acids and derivatives	Amino acids, peptides, and analogues	16709-12-9	228.145	0.630917	M+H-H2O	C9H19N5O3	0	44.9	metab_6873	pos
pos_6388	PG(18:1(12Z)-2OH(9,10)/i-13:0)	3.29e-05	0.0001022	2.0869	2.0844	0.6489	-0.6239	yes	-	-	-	-	-	-	-	HMDB0271208	Not Available	Not Available	Not Available	-	392.221	2.24833	M+2Na	C37H71O12P	0	42.9	metab_5783	pos
pos_1481	L-Glutamic Acid	8.71e-08	6.75e-07	2.0867	2.085	0.7167	-0.4805	yes	C00025	Peptides;Hormones and transmitters	Amino acids;Neurotransmitters	map00997;map02010;map01240;map01200;map00998;map00480;map00332;map04742;map00250;map05033;map04974;map04072;map04216;map00630;map00430;map04964;map00470;map00860;map04080;map05016;map05017;map05014;map04727;map01064;map04723;map05031;map04721;map01060;map01100;map00220;map04540;map01120;map01210;map00340;map00524;map01230;map04068;map05034;map01110;map00660;map05230;map04724;map05030;map00650;map…	Biosynthesis of various other secondary metabolites;ABC transporters;Biosynthesis of cofactors;Carbon metabolism;Biosynthesis of various antibiotics;Glutathione metabolism;Carbapenem biosynthesis;Taste transduction;Alanine, aspartate and glutamate metabolism;Nicotine addiction;Protein digestion and absorption;Phospholipase D signaling pathway;Ferroptosis;Glyoxylate and dicarboxylate metabolism;Ta…	Metabolism;Environmental Information Processing;Metabolism;Metabolism;Metabolism;Metabolism;Metabolism;Organismal Systems;Metabolism;Human Diseases;Organismal Systems;Environmental Information Processing;Cellular Processes;Metabolism;Metabolism;Organismal Systems;Metabolism;Metabolism;Environmental Information Processing;Human Diseases;Human Diseases;Human Diseases;Organismal Systems;Metabolism;O…	Biosynthesis of other secondary metabolites;Membrane transport;Global and overview maps;Global and overview maps;Biosynthesis of other secondary metabolites;Metabolism of other amino acids;Biosynthesis of other secondary metabolites;Sensory system;Amino acid metabolism;Substance dependence;Digestive system;Signal transduction;Cell growth and death;Carbohydrate metabolism;Metabolism of other amino…	PW_C000095;HMDB0060475;HMDB0000148;HMDB0003339;MJDBOTE0000649	Organic acids and derivatives	Carboxylic acids and derivatives	Amino acids, peptides, and analogues	56-86-0;6893-26-1	148.06	0.778767	M+H	C5H9NO4	88.6	0	metab_7504	pos
pos_5798	Gly Val Ile	1.02e-08	1.17e-07	2.0815	2.0799	0.6695	-0.5788	yes	-	-	-	-	-	-	-	-	-	-	-	-	288.191	3.1143	M+H	C13H25N3O4	42.3	0	metab_5143	pos
pos_6005	Gln Leu Thr Asp	7.87e-06	2.92e-05	2.0808	2.0837	0.6651	-0.5884	yes	-	-	-	-	-	-	-	-	-	-	-	-	476.234	2.76338	M+H	C19H33N5O9	44.2	0	metab_5365	pos
pos_1133	Creatine	6.82e-09	8.62e-08	2.0803	2.0786	0.6605	-0.5985	yes	C00300	-	-	map01100;map00330;map00260	Metabolic pathways;Arginine and proline metabolism;Glycine, serine and threonine metabolism	Metabolism;Metabolism;Metabolism	Global and overview maps;Amino acid metabolism;Amino acid metabolism	HMDB0000064;PW_C000046;MJDBOTE0000560	Organic acids and derivatives	Carboxylic acids and derivatives	Amino acids, peptides, and analogues	57-00-1	132.077	0.599817	M+H, M+K	C4H9N3O2	46.8	0	metab_147	pos
pos_2165	Thymidine	2.65e-07	1.65e-06	2.0745	2.0754	0.6581	-0.6037	yes	C00214	Nucleic acids	Nucleosides	map00240;map01100;map01232	Pyrimidine metabolism;Metabolic pathways;Nucleotide metabolism	Metabolism;Metabolism;Metabolism	Nucleotide metabolism;Global and overview maps;Global and overview maps	HMDB0000273;PW_C000187;MJDBOTE0000448	Nucleosides, nucleotides, and analogues	Pyrimidine nucleosides	Pyrimidine 2''-deoxyribonucleosides	50-89-5	260.124	2.38105	M+NH4	C10H14N2O5	0	61.3	metab_1253	pos
pos_6084	CDP-DG(18:2(9Z,11Z)/i-19:0)	0.000125	0.0003316	2.0724	2.073	0.6802	-0.5561	yes	C00269	-	-	map01100;map00564;map01110;map04070	Metabolic pathways;Glycerophospholipid metabolism;Biosynthesis of secondary metabolites;Phosphatidylinositol signaling system	Metabolism;Metabolism;Metabolism;Environmental Information Processing	Global and overview maps;Lipid metabolism;Global and overview maps;Signal transduction	PW_C076395;HMDB0116059	Lipids and lipid-like molecules	Glycerophospholipids	CDP-glycerols	-	532.772	2.64618	M+2Na	C49H87N3O15P2	0	60.9	metab_5452	pos
pos_6210	Tyr-Leu-Tyr-Glu-Ile-Ala-Arg	7.11e-07	3.72e-06	2.0702	2.0706	0.6801	-0.5561	yes	-	-	-	-	-	-	-	HMDB0247897	Organic acids and derivatives	Carboxylic acids and derivatives	Amino acids, peptides, and analogues	-	475.24	2.45918	M+H+Na	C44H66N10O12	0	39.4	metab_5590	pos
pos_6040	Goyasaponin I	2.29e-07	1.48e-06	2.0637	2.0642	0.7033	-0.5077	yes	-	-	-	-	-	-	-	HMDB0037221	Lipids and lipid-like molecules	Prenol lipids	Monoterpenoids	333333-20-3	690.324	2.70878	M+2H	C65H102O31	0	66.8	metab_5404	pos
neg_9300	5,5-Dimethylbarbituric acid	9.56e-08	4.46e-07	2.0631	2.0637	1.8641	0.8985	yes	-	-	-	-	-	-	-	-	-	-	-	-	155.045	1.56413	M-H	C6H8N2O3	47	0	metab_16884	neg
pos_3512	Sclareol	1.48e-10	3.88e-09	2.0629	2.0626	1.5843	0.6639	yes	C09183	-	-	map01110;map00904	Biosynthesis of secondary metabolites;Diterpenoid biosynthesis	Metabolism;Metabolism	Global and overview maps;Metabolism of terpenoids and polyketides	LMPR0104030010;HMDB0036827;MJDBOTE0001479	Lipids and lipid-like molecules	Prenol lipids	Diterpenoids	515-03-7	341.305	5.95947	M+CH3OH+H	C20H36O2	0	41.3	metab_2694	pos
pos_6242	Phaseoloside A	4.22e-09	5.96e-08	2.0585	2.0583	1.4258	0.5117	yes	C08967	-	-	-	-	-	-	HMDB0303708	Lipids and lipid-like molecules	Prenol lipids	Terpene glycosides	-	702.324	2.42798	M+H+Na	C65H104O31	0	39.3	metab_5624	pos
pos_6182	Strophanthin	1.35e-15	4.41e-13	2.0585	2.0582	0.677	-0.5629	yes	-	-	-	-	-	-	-	HMDB0242744	Lipids and lipid-like molecules	Steroids and steroid derivatives	Steroid lactones	-	711.364	2.50575	M+H	C36H54O14	0	60.5	metab_5560	pos
pos_7218	Beta-Alanyl-L-arginine	9.17e-06	3.33e-05	2.0518	2.051	0.6923	-0.5306	yes	C05340	-	-	map01100;map00410	Metabolic pathways;beta-Alanine metabolism	Metabolism;Metabolism	Global and overview maps;Metabolism of other amino acids	HMDB0060441	Organic acids and derivatives	Peptidomimetics	Hybrid peptides	-	228.145	1.09908	M+H-H2O	C9H19N5O3	0	52.7	metab_6663	pos
pos_7328	Glycyl-Arginine	8.07e-07	4.14e-06	2.0471	2.0461	0.7122	-0.4896	yes	-	-	-	-	-	-	-	HMDB0028835	Organic acids and derivatives	Carboxylic acids and derivatives	Amino acids, peptides, and analogues	-	214.13	0.8022	M+H-H2O	C8H17N5O3	0	62	metab_6774	pos
pos_7486	Pyrroline	1.45e-09	2.54e-08	2.039	2.0387	0.678	-0.5607	yes	C19907	-	-	-	-	-	-	HMDB0035924;HMDB0245392	Organoheterocyclic compounds	Heteroaromatic compounds	Not Available	109-97-7	70.0656	0.607633	M+H	C4H7N	0	44	metab_6933	pos
pos_6009	Gly Asp Phe	7.9e-08	6.22e-07	2.038	2.0365	0.6834	-0.5491	yes	-	-	-	-	-	-	-	-	-	-	-	-	338.134	2.76338	M+H	C15H19N3O6	71.6	0	metab_5369	pos
pos_1733	Gamma-L-Glutamyl-L-methionine sulfoxide	2.15e-16	1.19e-13	2.0306	2.0303	0.6903	-0.5347	yes	-	-	-	-	-	-	-	HMDB0038613	Organic acids and derivatives	Carboxylic acids and derivatives	Amino acids, peptides, and analogues	39015-69-5	277.085	1.75058	M+H-H2O	C10H18N2O6S	0	36.1	metab_791	pos
pos_7389	(R)-(+)-2-Pyrrolidone-5-carboxylic acid	0.0003373	0.000802	2.0273	2.0275	0.6773	-0.5622	yes	-	-	-	-	-	-	-	-	-	-	-	-	130.05	0.68525	M+H	C5H7NO3	59.7	0	metab_6838	pos
pos_125	N-[4-(4-methylphenyl)-1,3-thiazol-2-yl]heptanamide	5.96e-07	3.22e-06	2.0227	2.0228	1.4283	0.5143	yes	-	-	-	-	-	-	-	-	-	-	-	-	285.144	1.89077	M+H, 2M+K, M+H-H2O	C17H22N2OS	56.1	0	metab_274	pos
pos_1387	Palustrine	3.67e-12	2.14e-10	2.0163	2.0161	0.6172	-0.6962	yes	C10608	-	-	-	-	-	-	HMDB0256095	Phenylpropanoids and polyketides	Macrolactams	Not Available	22324-44-3	166.618	0.444033	M+H+Na	C17H31N3O2	0	33.1	metab_425	pos
pos_7436	Glycylprolylarginine	5.53e-08	4.66e-07	2.0161	2.0171	0.7167	-0.4806	yes	-	-	-	-	-	-	-	HMDB0252828	Organic acids and derivatives	Carboxylic acids and derivatives	Amino acids, peptides, and analogues	-	329.193	0.623083	M+H	C13H24N6O4	0	78.2	metab_6883	pos
pos_5087	7,8-Dihydro-3b,6a-dihydroxy-alpha-ionol 9-[apiosyl-(1->6)-glucoside]	1.64e-10	4.21e-09	2.0148	2.0136	0.7252	-0.4635	yes	-	-	-	-	-	-	-	HMDB0041579	Lipids and lipid-like molecules	Fatty Acyls	Fatty acyl glycosides	177261-73-3	564.302	4.87383	M+ACN+H	C24H42O12	0	43.8	metab_4416	pos
pos_6396	Ser Asp Ile	9.77e-08	7.41e-07	2.0046	2.0053	0.6798	-0.5567	yes	-	-	-	-	-	-	-	-	-	-	-	-	334.16	2.24058	M+H	C13H23N3O7	73.7	0	metab_5792	pos
neg_5790	Chenodeoxycholylglycine	1.05e-08	7.16e-08	2.0041	2.0036	0.4635	-1.1093	yes	C05466	-	-	map04976;map04979;map00121;map00120	Bile secretion;Cholesterol metabolism;Secondary bile acid biosynthesis;Primary bile acid biosynthesis	Organismal Systems;Organismal Systems;Metabolism;Metabolism	Digestive system;Digestive system;Lipid metabolism;Lipid metabolism	HMDB0242392;HMDB0000637	Lipids and lipid-like molecules	Steroids and steroid derivatives	Bile acids, alcohols and derivatives	640-79-9	448.307	5.7879	M-H	C26H43NO5	0	33.4	metab_13073	neg
pos_856	(12R)-12-Hydroxyoctadec-9-enoic acid	1.01e-05	3.6e-05	2.0014	2.0029	1.4932	0.5784	yes	-	-	-	-	-	-	-	HMDB0242322	Lipids and lipid-like molecules	Fatty Acyls	Fatty acids and conjugates	-	299.258	5.84807	M+H-2H2O, M+H	C18H34O3	0	51.7	metab_7328	pos
neg_8509	Ala Val Asp Asp	0.001897	0.002767	2.0007	1.9954	0.4082	-1.2927	yes	-	-	-	-	-	-	-	-	-	-	-	-	417.163	2.68603	M-H	C16H26N4O9	61.9	0	metab_16028	neg
pos_6548	Prolyl-Gamma-glutamate	1.51e-08	1.63e-07	1.9975	1.9957	0.7277	-0.4587	yes	-	-	-	-	-	-	-	HMDB0029031	Organic acids and derivatives	Carboxylic acids and derivatives	Amino acids, peptides, and analogues	-	487.251	2.04588	2M+H	C10H17N3O4	0	73.3	metab_5954	pos
neg_2178	1-Methyluric acid	1.76e-08	1.1e-07	1.9964	1.9954	1.9163	0.9384	yes	C16359	-	-	map00232	Caffeine metabolism	Metabolism	Biosynthesis of other secondary metabolites	HMDB0003099;PW_C001777	Organoheterocyclic compounds	Imidazopyrimidines	Purines and purine derivatives	708-79-2	181.036	2.24407	M-H	C6H6N4O3	70.3	0	metab_9148	neg
neg_8565	Ganoderic acid L	0.001101	0.001664	1.9905	1.989	2.216	1.148	yes	-	-	-	-	-	-	-	HMDB0035885	Phenylpropanoids and polyketides	Isoflavonoids	O-methylated isoflavonoids	102607-24-9	555.289	2.61355	M+Na-2H	C30H46O8	0	82.4	metab_16088	neg
pos_6055	6-Deoxy-4-O-(3,6-di-O-methyl-beta-D-glucopyranosyl)-2,3-di-O-methyl-alpha-L-mannopyranose	2.25e-07	1.45e-06	1.9883	1.9899	0.687	-0.5415	yes	-	-	-	-	-	-	-	HMDB0249889	Organic oxygen compounds	Organooxygen compounds	Carbohydrates and carbohydrate conjugates	-	383.192	2.6853	M+H	C16H30O10	0	59.8	metab_5420	pos
pos_7091	4-(Glutamylamino) butanoate	2.29e-06	1.01e-05	1.9867	1.9858	0.6956	-0.5237	yes	C15767	-	-	map01100;map00330	Metabolic pathways;Arginine and proline metabolism	Metabolism;Metabolism	Global and overview maps;Amino acid metabolism	HMDB0012161	Organic acids and derivatives	Carboxylic acids and derivatives	Amino acids, peptides, and analogues	5105-96-4	233.113	1.52592	M+H	C9H16N2O5	0	64	metab_6526	pos
neg_6488	Dehydrodolichol diphosphate	5.3e-14	4.51e-12	1.9845	1.9838	0.5335	-0.9065	yes	C17435	-	-	-	-	-	-	HMDB0060469	Lipids and lipid-like molecules	Prenol lipids	Polyprenols	-	499.241	5.1245	M-H2O-H	C25H44O7P2	0	66.9	metab_17603	neg
neg_1828	Gamma-Glutamylarginine	0.004532	0.006225	1.9839	1.9952	0.3877	-1.3671	yes	-	-	-	-	-	-	-	HMDB0029143	Organic acids and derivatives	Carboxylic acids and derivatives	Amino acids, peptides, and analogues	31106-03-3	284.136	1.11225	M-H2O-H	C11H21N5O5	0	53.9	metab_8780	neg
pos_132	Trans-Cinnamic acid	1.43e-07	1e-06	1.9816	1.9828	0.7927	-0.3351	yes	C00423	-	-	map01100;map01220;map00996;map01110;map01120;map00130;map00999;map00940;map00360;map01070;map01060	Metabolic pathways;Degradation of aromatic compounds;Biosynthesis of various alkaloids;Biosynthesis of secondary metabolites;Microbial metabolism in diverse environments;Ubiquinone and other terpenoid-quinone biosynthesis;Biosynthesis of various plant secondary metabolites;Phenylpropanoid biosynthesis;Phenylalanine metabolism;Biosynthesis of plant hormones;Biosynthesis of plant secondary metaboli…	Metabolism;Metabolism;Metabolism;Metabolism;Metabolism;Metabolism;Metabolism;Metabolism;Metabolism;Metabolism;Metabolism	Global and overview maps;Global and overview maps;Biosynthesis of other secondary metabolites;Global and overview maps;Global and overview maps;Metabolism of cofactors and vitamins;Biosynthesis of other secondary metabolites;Biosynthesis of other secondary metabolites;Amino acid metabolism;Chemical structure transformation maps;Chemical structure transformation maps	HMDB0000567;HMDB0000930	Phenylpropanoids and polyketides	Cinnamic acids and derivatives	Cinnamic acids	140-10-3;102-94-3	166.086	1.93727	M+H-H2O, M+NH4, M+H	C9H8O2	0	56.7	metab_7517	pos
pos_7488	Propionic acid	1.37e-14	2.31e-12	1.9784	1.9781	0.7715	-0.3742	yes	C00163	Organic acids	Carboxylic acids	map01100;map01220;map00640;map00642;map01120;map00760;map04973;map04974	Metabolic pathways;Degradation of aromatic compounds;Propanoate metabolism;Ethylbenzene degradation;Microbial metabolism in diverse environments;Nicotinate and nicotinamide metabolism;Carbohydrate digestion and absorption;Protein digestion and absorption	Metabolism;Metabolism;Metabolism;Metabolism;Metabolism;Metabolism;Organismal Systems;Organismal Systems	Global and overview maps;Global and overview maps;Carbohydrate metabolism;Xenobiotics biodegradation and metabolism;Global and overview maps;Metabolism of cofactors and vitamins;Digestive system;Digestive system	HMDB0000237;LMFA01010003;PW_C000159	Organic acids and derivatives	Carboxylic acids and derivatives	Carboxylic acids	1979-09-04	116.071	0.607633	M+ACN+H	C3H6O2	0	47.2	metab_6935	pos
pos_6127	(S)-3-Hydroxy-N-methylcoclaurine	1.6e-08	1.7e-07	1.9779	1.9783	0.6885	-0.5385	yes	C05202	-	-	map00950;map01100;map01110;map01063	Isoquinoline alkaloid biosynthesis;Metabolic pathways;Biosynthesis of secondary metabolites;Biosynthesis of alkaloids derived from shikimate pathway	Metabolism;Metabolism;Metabolism;Metabolism	Biosynthesis of other secondary metabolites;Global and overview maps;Global and overview maps;Chemical structure transformation maps	HMDB0006921	Organoheterocyclic compounds	Isoquinolines and derivatives	Benzylisoquinolines	-	338.134	2.58367	M+Na	C18H21NO4	0	39.3	metab_5499	pos
neg_7149	Diethylenetriamine crosslinked with epichlorohydrin	4.68e-08	2.45e-07	1.9776	1.9788	0.5408	-0.8868	yes	-	-	-	-	-	-	-	HMDB0032216	Benzenoids	Benzene and substituted derivatives	Phenylbutylamines	25085-17-0	569.294	4.10903	2M+Hac-H	C14H22ClNO	0	47.5	metab_14541	neg
neg_9074	Adenosine 3'-monophosphate	8.4e-12	2.46e-10	1.976	1.9758	0.5531	-0.8543	yes	C01367	-	-	map01100;map00230	Metabolic pathways;Purine metabolism	Metabolism;Metabolism	Global and overview maps;Nucleotide metabolism	HMDB0003540	Nucleosides, nucleotides, and analogues	Ribonucleoside 3''-phosphates	Not Available	84-21-9	346.056	1.88347	M-H	C10H14N5O7P	86.6	0	metab_16643	neg
neg_3459	Mirodenafil	0.000383	0.0006266	1.9717	1.9692	0.4687	-1.0932	yes	-	-	-	-	-	-	-	HMDB0254750	Benzenoids	Benzene and substituted derivatives	Benzenesulfonamides	-	530.247	3.89567	M-H	C26H37N5O5S	0	62.9	metab_10553	neg
pos_2301	CDP-DG(20:2(11Z,14Z)/22:6(4Z,7Z,11E,13Z,15E,19Z)-2OH(10S,17))	8.29e-06	3.05e-05	1.9704	1.9705	1.4652	0.5511	yes	-	-	-	-	-	-	-	HMDB0291887	Not Available	Not Available	Not Available	-	555.779	2.61487	M+2H	C54H85N3O17P2	0	30.5	metab_1399	pos
neg_8930	8-hydroxy Guanosine	3.2e-14	3.01e-12	1.963	1.9627	0.5012	-0.9965	yes	-	-	-	-	-	-	-	-	-	-	-	-	298.079	2.17167	M-H	C10H13N5O6	34.6	0	metab_16490	neg
pos_3393	CL(8:0/11:0/15:0/18:2(9Z,11Z))	0.0001573	0.000407	1.9622	1.9617	0.7005	-0.5136	yes	-	-	-	-	-	-	-	HMDB0118268	Lipids and lipid-like molecules	Glycerophospholipids	Glycerophosphoglycerophosphoglycerols	-	591.389	5.7388	M+2H	C61H114O17P2	0	32.4	metab_2564	pos
pos_2103	Capsianoside V	5.07e-12	2.69e-10	1.9613	1.9606	0.7497	-0.4156	yes	-	-	-	-	-	-	-	HMDB0030737	Lipids and lipid-like molecules	Prenol lipids	Terpene glycosides	121924-06-9	556.308	2.2718	M+ACN+H	C26H42O10	0	44.2	metab_1186	pos
pos_5933	Phenylacetylglutamine	2.33e-09	3.7e-08	1.9593	1.9583	0.6861	-0.5435	yes	C04148	-	-	map00360	Phenylalanine metabolism	Metabolism	Amino acid metabolism	HMDB0006344;HMDB0062645;PW_C002728;MJDBOTE0000584	Organic acids and derivatives	Carboxylic acids and derivatives	Amino acids, peptides, and analogues	28047-15-6	306.144	2.88032	M+ACN+H	C13H16N2O4	0	51.6	metab_7513	pos
pos_7059	7-Methylguanine	5.22e-09	6.94e-08	1.9579	1.959	0.725	-0.464	yes	C02242	-	-	-	-	-	-	HMDB0006040;HMDB0000897	Organoheterocyclic compounds	Imidazopyrimidines	Purines and purine derivatives	10030-78-1;578-76-7	166.072	1.65698	M+H	C6H7N5O	79.9	0	metab_7492	pos
pos_2473	Thr Val Phe Asp	8.39e-13	6.68e-11	1.9576	1.9573	0.7041	-0.5062	yes	-	-	-	-	-	-	-	-	-	-	-	-	481.228	2.95848	M+H	C22H32N4O8	41.2	0	metab_1588	pos
neg_7220	PC(20:4(5Z,8Z,11Z,14Z)-OH(20)/2:0)	0.001357	0.002021	1.9574	1.9487	0.4818	-1.0534	yes	-	-	-	-	-	-	-	HMDB0288807	Not Available	Not Available	Not Available	-	646.342	4.02902	M+FA-H	C30H52NO9P	0	65.3	metab_14619	neg
neg_3103	Natamycin	2.78e-06	7.82e-06	1.9571	1.9532	0.539	-0.8916	yes	C08073	-	-	map01052	Type I polyketide structures	Metabolism	Metabolism of terpenoids and polyketides	HMDB0242755;HMDB0014964;MJDBOTE0001394	Organic oxygen compounds	Organooxygen compounds	Carbonyl compounds	7681-93-8	646.285	3.44982	M-H2O-H	C33H47NO13	0	84.3	metab_10164	neg
pos_454	N,N-Didesmethyltramadol	6.57e-06	2.51e-05	1.9566	1.9529	0.708	-0.4982	yes	-	-	-	-	-	-	-	PW_C040584;HMDB0060849	Benzenoids	Phenol ethers	Anisoles	931115-27-4	258.144	0.856883	M+H-2H2O, M+Na	C14H21NO2	0	50.6	metab_3820	pos
pos_3282	17-AAG	1.21e-14	2.17e-12	1.9539	1.9536	0.7033	-0.5078	yes	-	-	-	-	-	-	-	HMDB0244762	Phenylpropanoids and polyketides	Macrolactams	Not Available	-	550.287	5.51142	M+H-2H2O	C31H43N3O8	0	83.4	metab_2442	pos
pos_2189	6-Acetamidohexanoic acid	9.55e-08	7.26e-07	1.9539	1.9544	1.4942	0.5794	yes	-	-	-	-	-	-	-	HMDB0247031	Lipids and lipid-like molecules	Fatty Acyls	Fatty acids and conjugates	-	174.112	2.42017	M+H	C8H15NO3	0	34.6	metab_1279	pos
neg_5985	Taurocholic acid 3-sulfate	8.34e-05	0.0001572	1.9479	1.9458	0.5364	-0.8985	yes	-	-	-	-	-	-	-	LMST05020031;HMDB0002581	Lipids and lipid-like molecules	Steroids and steroid derivatives	Steroidal glycosides	67030-62-0	296.617	5.66032	M-2H	C26H45NO10S2	0	59.7	metab_13278	neg
neg_6745	Hordatine A	2.39e-17	1.81e-14	1.9407	1.9403	0.5689	-0.8138	yes	C08307	-	-	map01100;map01110;map00999	Metabolic pathways;Biosynthesis of secondary metabolites;Biosynthesis of various plant secondary metabolites	Metabolism;Metabolism;Metabolism	Global and overview maps;Global and overview maps;Biosynthesis of other secondary metabolites	HMDB0030461	Phenylpropanoids and polyketides	2-arylbenzofuran flavonoids	Not Available	7073-64-5	587.269	4.61797	M+Na-2H	C28H38N8O5	0	71.8	metab_14106	neg
neg_7273	Arg-His-Phe-Trp-Gln-Gln	2.24e-15	3.73e-13	1.94	1.9396	0.6137	-0.7043	yes	-	-	-	-	-	-	-	HMDB0248576	Organic acids and derivatives	Carboxylic acids and derivatives	Amino acids, peptides, and analogues	-	945.432	3.97313	M+FA-H	C42H56N14O9	0	93.1	metab_14677	neg
pos_1548	Cinaciguat	3.37e-07	2e-06	1.9393	1.9372	0.6955	-0.5238	yes	-	-	-	-	-	-	-	HMDB0250257	Phenylpropanoids and polyketides	Stilbenes	Not Available	-	294.64	1.0756	M+H+Na	C36H39NO5	0	38.1	metab_596	pos
neg_7530	Glu Val Ile Glu	4.83e-06	1.27e-05	1.9353	1.9347	0.501	-0.9971	yes	-	-	-	-	-	-	-	-	-	-	-	-	487.241	3.6895	M-H	C21H36N4O9	49.1	0	metab_14959	neg
pos_2160	Galactoarabinan	1.38e-10	3.69e-09	1.9316	1.9309	0.7692	-0.3786	yes	-	-	-	-	-	-	-	HMDB0252576	Organic oxygen compounds	Organooxygen compounds	Carbohydrates and carbohydrate conjugates	-	465.197	2.3655	M+H-2H2O	C20H36O14	0	55.1	metab_1248	pos
pos_6079	Ile Thr Tyr	1.57e-07	1.08e-06	1.93	1.93	1.401	0.4865	yes	-	-	-	-	-	-	-	-	-	-	-	-	396.212	2.65402	M+H	C19H29N3O6	87	0	metab_5446	pos
pos_6593	1H-Imidazole-1-ethanol, alpha-2-naphthalenyl-	2.3e-07	1.48e-06	1.9246	1.9259	0.7251	-0.4638	yes	-	-	-	-	-	-	-	HMDB0255423	Benzenoids	Naphthalenes	Not Available	-	499.214	1.99923	2M+Na	C15H14N2O	0	31.6	metab_5998	pos
neg_8549	Pro-leu	6.5e-10	7.33e-09	1.9245	1.9244	0.5469	-0.8706	yes	-	-	-	-	-	-	-	HMDB0253028	Organic acids and derivatives	Carboxylic acids and derivatives	Amino acids, peptides, and analogues	-	227.14	2.6375	M-H	C11H20N2O3	0	30.3	metab_16071	neg
pos_1660	Monopropionylcadaverine	7.57e-06	2.83e-05	1.9214	1.9226	1.443	0.5291	yes	-	-	-	-	-	-	-	HMDB0254871	Organic acids and derivatives	Carboxylic acids and derivatives	Carboxylic acid derivatives	-	159.149	1.63368	M+H	C8H18N2O	0	44.2	metab_713	pos
neg_4105	N-[2-Ethoxy-2-(4-methoxyphenyl)ethyl]cinnamide	4.5e-14	3.93e-12	1.9195	1.919	0.568	-0.816	yes	-	-	-	-	-	-	-	HMDB0039633	Phenylpropanoids and polyketides	Cinnamic acids and derivatives	Cinnamic acid amides	70546-94-0	709.353	4.94365	2M+Hac-H	C20H23NO3	0	35.3	metab_11254	neg
pos_4744	Chenodeoxycholylarginine	4.47e-11	1.56e-09	1.9163	1.9162	1.3597	0.4433	yes	-	-	-	-	-	-	-	HMDB0242396	Lipids and lipid-like molecules	Steroids and steroid derivatives	Bile acids, alcohols and derivatives	-	549.4	5.6684	M+H	C30H52N4O5	0	42.5	metab_4045	pos
neg_6778	Ile Glu Val Asp Leu	2.11e-11	5.05e-10	1.9145	1.9136	0.5174	-0.9508	yes	-	-	-	-	-	-	-	-	-	-	-	-	586.309	4.56542	M-H	C26H45N5O10	49.7	0	metab_14141	neg
pos_5637	Ile Thr Ile	2.71e-10	6.38e-09	1.9065	1.9064	1.3907	0.4758	yes	-	-	-	-	-	-	-	-	-	-	-	-	346.233	3.58887	M+H	C16H31N3O5	85.8	0	metab_4986	pos
pos_2371	1,6-anhydro-N-acetyl-beta-muramate	3.09e-08	2.89e-07	1.9052	1.9054	0.703	-0.5083	yes	C19769	-	-	map01100;map00520;map01250	Metabolic pathways;Amino sugar and nucleotide sugar metabolism;Biosynthesis of nucleotide sugars	Metabolism;Metabolism;Metabolism	Global and overview maps;Carbohydrate metabolism;Global and overview maps	HMDB0304012	Organoheterocyclic compounds	Oxepanes	Not Available	-	292.129	2.7712	M+NH4	C11H16NO7-	0	36.1	metab_1476	pos
pos_5964	Dazmegrel	7.12e-11	2.18e-09	1.8999	1.8996	0.7217	-0.4705	yes	-	-	-	-	-	-	-	HMDB0250884	Organoheterocyclic compounds	Indoles and derivatives	Indolyl carboxylic acids and derivatives	-	584.303	2.82572	2M+NH4	C16H17N3O2	0	34.6	metab_5320	pos
pos_2119	10-Hydroxy-octadec-12Z-enoate-9-beta-D-glucuronide	3.13e-07	1.88e-06	1.8994	1.8994	0.7357	-0.4429	yes	-	-	-	-	-	-	-	HMDB0060120	Lipids and lipid-like molecules	Saccharolipids	Not Available	-	535.25	2.29515	M+2Na-H	C24H42O10	0	68.6	metab_1203	pos
pos_1829	CDP-DG(22:6(5Z,8E,10Z,13Z,15E,19Z)-2OH(7S, 17S)/20:2(11Z,14Z))	6.78e-07	3.58e-06	1.8923	1.8922	1.353	0.4361	yes	-	-	-	-	-	-	-	HMDB0291872	Not Available	Not Available	Not Available	-	577.756	1.88298	M+2Na	C54H85N3O17P2	0	62.3	metab_895	pos
pos_3378	Lovastatin	8.18e-07	4.19e-06	1.8889	1.889	1.3469	0.4296	yes	C07074	-	-	-	-	-	-	HMDB0248085;PW_C008769;HMDB0014372;MJDBOTE0001458	Organoheterocyclic compounds	Lactones	Delta valerolactones	75330-75-5	422.29	5.72315	M+NH4	C24H36O5	0	76.4	metab_2547	pos
pos_2335	Revefenacin	6.01e-08	5.02e-07	1.8865	1.8868	0.7459	-0.4229	yes	-	-	-	-	-	-	-	HMDB0304897	Organoheterocyclic compounds	Piperidines	Benzylpiperidines	-	642.308	2.67748	M+2Na-H	C35H43N5O4	0	76.9	metab_1436	pos
pos_7683	Pipecolic Acid	2.3e-11	9.32e-10	1.8843	1.8846	0.7399	-0.4347	yes	C00408	-	-	map01100;map00310;map01110;map00960;map01064;map01060	Metabolic pathways;Lysine degradation;Biosynthesis of secondary metabolites;Tropane, piperidine and pyridine alkaloid biosynthesis;Biosynthesis of alkaloids derived from ornithine, lysine and nicotinic acid;Biosynthesis of plant secondary metabolites	Metabolism;Metabolism;Metabolism;Metabolism;Metabolism;Metabolism	Global and overview maps;Amino acid metabolism;Global and overview maps;Biosynthesis of other secondary metabolites;Chemical structure transformation maps;Chemical structure transformation maps	HMDB0000716;HMDB0000070;MJDBOTE0000664	Organic acids and derivatives	Carboxylic acids and derivatives	Amino acids, peptides, and analogues	3105-95-1;535-75-1	130.086	0.467433	M+H	C6H11NO2	85.7	0	metab_7150	pos
pos_6012	Floratheasaponin F	1.26e-07	9.07e-07	1.8842	1.8843	1.351	0.434	yes	-	-	-	-	-	-	-	HMDB0302064	Lipids and lipid-like molecules	Prenol lipids	Terpene glycosides	-	667.309	2.74773	M+2Na	C63H100O27	0	58.5	metab_5373	pos
pos_7098	Deoxyguanosine	1.84e-07	1.23e-06	1.8815	1.8816	1.347	0.4298	yes	C00330	Nucleic acids	Nucleosides	map01100;map02010;map01232;map00230	Metabolic pathways;ABC transporters;Nucleotide metabolism;Purine metabolism	Metabolism;Environmental Information Processing;Metabolism;Metabolism	Global and overview maps;Membrane transport;Global and overview maps;Nucleotide metabolism	PW_C000058;HMDB0000085;MJDBOTE0000696	Nucleosides, nucleotides, and analogues	Purine nucleosides	Purine 2''-deoxyribonucleosides	961-07-9	268.104	1.46467	M+H	C10H13N5O4	0	73.3	metab_6533	pos
pos_2466	Ser Leu Ile	2.39e-14	3.56e-12	1.8782	1.878	0.7198	-0.4744	yes	-	-	-	-	-	-	-	-	-	-	-	-	332.217	2.95065	M+H	C15H29N3O5	60.6	0	metab_1580	pos
neg_8463	Nelfinavir	0.0002925	0.0004896	1.8771	1.8814	1.9135	0.9362	yes	C07257	-	-	-	-	-	-	HMDB0014365	Organic acids and derivatives	Carboxylic acids and derivatives	Amino acids, peptides, and analogues	159989-64-7	612.311	2.7419	M+FA-H	C32H45N3O4S	0	83.8	metab_15977	neg
neg_9981	Taurine	7.87e-16	1.79e-13	1.8757	1.8753	0.4957	-1.0126	yes	C00245	-	-	map01100;map00920;map00430;map02010;map00120;map04080	Metabolic pathways;Sulfur metabolism;Taurine and hypotaurine metabolism;ABC transporters;Primary bile acid biosynthesis;Neuroactive ligand-receptor interaction	Metabolism;Metabolism;Metabolism;Environmental Information Processing;Metabolism;Environmental Information Processing	Global and overview maps;Energy metabolism;Metabolism of other amino acids;Membrane transport;Lipid metabolism;Signaling molecules and interaction	HMDB0000251;PW_C000171;MJDBOTE0000787	Organic acids and derivatives	Organic sulfonic acids and derivatives	Organosulfonic acids and derivatives	107-35-7	124.006	0.552333	M-H	C2H7NO3S	42.5	0	metab_17576	neg
neg_8619	N1,N10-Dicoumaroylspermidine	1.42e-07	6.17e-07	1.8739	1.8751	0.5946	-0.7501	yes	-	-	-	-	-	-	-	HMDB0033469	Phenylpropanoids and polyketides	Cinnamic acids and derivatives	Hydroxycinnamic acids and derivatives	65715-79-9	474.184	2.54897	M+K-2H	C25H31N3O4	0	51.5	metab_16147	neg
pos_2069	Prolyl-phenylalanyl-arginine-4-nitroanilide	2.98e-09	4.46e-08	1.8736	1.8731	0.7698	-0.3774	yes	-	-	-	-	-	-	-	HMDB0259666	Organic acids and derivatives	Carboxylic acids and derivatives	Amino acids, peptides, and analogues	-	602.277	2.21723	M+ACN+Na	C26H34N8O5	0	37.4	metab_1148	pos
neg_7196	Preladenant	4.57e-09	3.6e-08	1.8724	1.8726	0.6107	-0.7116	yes	-	-	-	-	-	-	-	HMDB0256760	Organoheterocyclic compounds	Diazinanes	Piperazines	-	548.236	4.06103	M+FA-H	C25H29N9O3	0	38.2	metab_14591	neg
pos_79	Gamma-Glutamylalanine	6.2e-08	5.18e-07	1.8697	1.869	0.7511	-0.4129	yes	C03740	-	-	map01100;map00480	Metabolic pathways;Glutathione metabolism	Metabolism;Metabolism	Global and overview maps;Metabolism of other amino acids	HMDB0006248;HMDB0036301	Organic acids and derivatives	Carboxylic acids and derivatives	Amino acids, peptides, and analogues	5875-41-2	219.097	0.91145	M+H, M+K, M+Na, M+ACN+Na	C8H14N2O5	0	68.7	metab_7254	pos
pos_250	Lysylproline	2.56e-11	1.01e-09	1.8677	1.8673	0.7607	-0.3946	yes	-	-	-	-	-	-	-	HMDB0028959	Organic acids and derivatives	Carboxylic acids and derivatives	Amino acids, peptides, and analogues	52766-27-5	244.165	0.599817	M+Na, M+K, M+H	C11H21N3O3	0	48.6	metab_1617	pos
pos_1818	Lys Ser Leu	2.58e-09	4.02e-08	1.8661	1.8659	0.7339	-0.4464	yes	-	-	-	-	-	-	-	-	-	-	-	-	347.228	1.8675	M+H	C15H30N4O5	54.3	0	metab_883	pos
neg_6773	N-Docosahexaenoyl Methionine	9.58e-05	0.0001784	1.866	1.8593	0.525	-0.9296	yes	-	-	-	-	-	-	-	HMDB0242019	Not Available	Not Available	Not Available	-	494.247	4.57342	M+Cl	C27H41NO3S	0	53.8	metab_14136	neg
pos_1822	8-Cyclopentyl-3-(3-fluoro-propyl)-1-propyl-3,7-dihydro-purine-2,6-dione	4.63e-12	2.53e-10	1.8658	1.8655	0.7434	-0.4278	yes	-	-	-	-	-	-	-	HMDB0260333	Organoheterocyclic compounds	Imidazopyrimidines	Purines and purine derivatives	-	667.351	1.8675	2M+Na	C16H23FN4O2	0	32.8	metab_888	pos
neg_6420	Stercobilinogen	8.41e-15	1.05e-12	1.8644	1.8639	0.5958	-0.7471	yes	C05789	-	-	map00860	Porphyrin metabolism	Metabolism	Metabolism of cofactors and vitamins	HMDB0004157	Organoheterocyclic compounds	Tetrapyrroles and derivatives	Bilirubins	17095-63-5	641.352	5.23832	M+FA-H	C33H48N4O6	0	82.5	metab_13748	neg
pos_7588	Laminine	1.66e-10	4.21e-09	1.8617	1.8614	0.728	-0.4581	yes	-	-	-	-	-	-	-	-	-	-	-	-	189.16	0.53765	M+H	C9H20N2O2	69.9	0	metab_7044	pos
pos_5876	Doxepin N-oxide glucuronide	9.74e-10	1.81e-08	1.8601	1.8597	0.7252	-0.4636	yes	-	-	-	-	-	-	-	PW_C040598;HMDB0061139	Organoheterocyclic compounds	Benzoxepines	Dibenzoxepines	-	490.229	2.95848	M+NH4	C25H30NO8+	0	31.4	metab_5226	pos
neg_3517	Glucosamine	1.16e-05	2.72e-05	1.8591	1.8604	0.5176	-0.95	yes	C00329	Carbohydrates	Monosaccharides	map01100;map00520;map02060;map01250	Metabolic pathways;Amino sugar and nucleotide sugar metabolism;Phosphotransferase system (PTS);Biosynthesis of nucleotide sugars	Metabolism;Metabolism;Environmental Information Processing;Metabolism	Global and overview maps;Carbohydrate metabolism;Membrane transport;Global and overview maps	HMDB0001514;HMDB0245095;HMDB0242589;HMDB0030091;PW_C001167	Organic oxygen compounds	Organooxygen compounds	Carbohydrates and carbohydrate conjugates	3416-24-8;14257-69-3	536.236	3.97313	3M-H	C6H13NO5	0	32.6	metab_17609	neg
pos_1790	Capsicoside A1	3.98e-08	3.56e-07	1.858	1.8565	0.7497	-0.4156	yes	-	-	-	-	-	-	-	HMDB0303762	Lipids and lipid-like molecules	Steroids and steroid derivatives	Steroidal glycosides	-	320.176	1.82057	M+2Na	C33H54O9	0	35.9	metab_852	pos
pos_7101	Lys Leu	1.54e-12	1.06e-10	1.8575	1.8571	0.7806	-0.3574	yes	-	-	-	-	-	-	-	-	-	-	-	-	260.196	1.43402	M+H	C12H25N3O3	83.2	0	metab_6538	pos
pos_6637	Retinyl ester	2.52e-06	1.1e-05	1.857	1.8572	0.7268	-0.4603	yes	C02075	-	-	map01100;map00830;map04977	Metabolic pathways;Retinol metabolism;Vitamin digestion and absorption	Metabolism;Metabolism;Organismal Systems	Global and overview maps;Metabolism of cofactors and vitamins;Digestive system	PW_C001935;HMDB0003598	Lipids and lipid-like molecules	Prenol lipids	Retinoids	-	163.112	1.93727	M+H+Na	C20H30O2	0	43.4	metab_6043	pos
neg_4526	4-Hydroxy-3-(3-methyl-2-butenyl)acetophenone	2.22e-08	1.33e-07	1.8569	1.855	0.6335	-0.6586	yes	C10702	-	-	-	-	-	-	HMDB0030770	Organic oxygen compounds	Organooxygen compounds	Carbonyl compounds	26932-05-8	611.341	5.59585	3M-H	C13H16O2	0	53.7	metab_11716	neg
neg_6478	Proline glutamate	2.45e-14	2.49e-12	1.8562	1.8558	0.557	-0.8443	yes	-	-	-	-	-	-	-	HMDB0256798	Organic acids and derivatives	Carboxylic acids and derivatives	Amino acids, peptides, and analogues	-	281.073	5.1481	M+Na-2H	C10H16N2O6	0	30.7	metab_13811	neg
neg_6101	DG(LTE4/0:0/i-12:0)	7.88e-05	0.0001495	1.8554	1.8516	0.5957	-0.7474	yes	-	-	-	-	-	-	-	HMDB0298381	Not Available	Not Available	Not Available	-	732.394	5.58785	M+K-2H	C38H65NO8S	0	83.1	metab_13403	neg
pos_2663	Cyclosquamosin G	2.6e-11	1.03e-09	1.8535	1.8533	0.7533	-0.4088	yes	-	-	-	-	-	-	-	HMDB0303372	Organic acids and derivatives	Carboxylic acids and derivatives	Amino acids, peptides, and analogues	-	846.419	3.60453	2M+3H2O+2H	C39H60N8O10S	0	60	metab_1789	pos
neg_3783	LysoPE(0:0/18:2(9Z,12Z))	4.33e-07	1.59e-06	1.8487	1.8447	0.6388	-0.6465	yes	-	-	-	-	-	-	-	HMDB0011477	Lipids and lipid-like molecules	Glycerophospholipids	Glycerophosphoethanolamines	-	498.257	4.34105	M+Na-2H	C23H44NO7P	0	68.6	metab_10904	neg
neg_7197	Beta-Funaltrexamine	3.44e-12	1.22e-10	1.8477	1.847	0.5886	-0.7646	yes	C18127	-	-	-	-	-	-	HMDB0249128	Benzenoids	Phenanthrenes and derivatives	Not Available	72782-05-9	435.188	4.06103	M-H2O-H	C25H30N2O6	0	53.5	metab_14592	neg
pos_7156	Cerivastatin lactone	4.07e-06	1.66e-05	1.8471	1.8462	0.7218	-0.4704	yes	-	-	-	-	-	-	-	HMDB0249823	Organoheterocyclic compounds	Pyridines and derivatives	Phenylpyridines	-	221.624	1.22412	M+2H	C26H32FNO4	0	32.4	metab_6596	pos
pos_6244	Lucidenic acid B	1.33e-07	9.49e-07	1.8469	1.8449	0.7322	-0.4497	yes	-	-	-	-	-	-	-	HMDB0037610	Lipids and lipid-like molecules	Prenol lipids	Triterpenoids	95311-95-8	488.27	2.42798	2M+3H2O+2H	C27H38O7	0	33.6	metab_5626	pos
pos_2521	Tyrosyl-Phenylalanine	5.53e-10	1.14e-08	1.8427	1.8426	1.3512	0.4343	yes	-	-	-	-	-	-	-	HMDB0029112	Organic acids and derivatives	Carboxylic acids and derivatives	Amino acids, peptides, and analogues	-	674.313	3.07533	2M+NH4	C18H20N2O4	0	31.3	metab_1639	pos
neg_7412	DIPROTIN B	3.26e-16	1.03e-13	1.8396	1.8393	0.5585	-0.8402	yes	-	-	-	-	-	-	-	-	-	-	-	-	326.208	3.82502	M-H	C16H29N3O4	35.1	0	metab_14830	neg
pos_1834	Fevicordin B 2-gentiobioside	6.88e-05	0.0001949	1.8384	1.8365	0.7182	-0.4775	yes	-	-	-	-	-	-	-	HMDB0035296	Lipids and lipid-like molecules	Steroids and steroid derivatives	Steroidal glycosides	151589-22-9	446.201	1.89077	M+H+Na	C43H64O18	0	44.8	metab_901	pos
pos_82	Pyroglutamic Acid	0.0002125	0.00053	1.8381	1.8379	0.7717	-0.3739	yes	C01879	Peptides	Amino acids	map01100;map00480	Metabolic pathways;Glutathione metabolism	Metabolism;Metabolism	Global and overview maps;Metabolism of other amino acids	PW_C000182;HMDB0000267;MJDBOTE0000549	Organic acids and derivatives	Carboxylic acids and derivatives	Amino acids, peptides, and analogues	98-79-3	130.05	1.23195	M+H, M+K, 2M+H, 2M+Na	C5H7NO3	73.3	0	metab_7288	pos
neg_3956	Gluten exorphin C	6.46e-06	1.63e-05	1.8378	1.8381	0.5931	-0.7537	yes	-	-	-	-	-	-	-	HMDB0059796	Organic acids and derivatives	Carboxylic acids and derivatives	Amino acids, peptides, and analogues	-	704.348	4.63793	M+K-2H	C29H57N5O12	0	76.8	metab_11089	neg
neg_6556	Falipamil	3.83e-13	2.02e-11	1.8315	1.8306	0.5751	-0.798	yes	-	-	-	-	-	-	-	HMDB0252160	Organoheterocyclic compounds	Isoindoles and derivatives	Isoindolines	-	473.225	4.9819	M+FA-H	C24H32N2O5	0	34.6	metab_13897	neg
neg_3178	Beta-Alanine, N-(N-(2-((2,2-dimethyl-1,3-dioxolan-4-yl)methoxy)-2-oxo-1-(phenylmethyl)ethyl)-L-phenylalanyl)-	5.85e-11	1.11e-09	1.8301	1.8287	0.6128	-0.7064	yes	-	-	-	-	-	-	-	HMDB0257549	Organic acids and derivatives	Peptidomimetics	Hybrid peptides	-	479.215	3.54583	M-H2O-H	C27H34N2O7	0	36.5	metab_10246	neg
neg_8652	Valylhydroxyproline	4.17e-11	8.55e-10	1.83	1.8285	0.61	-0.713	yes	-	-	-	-	-	-	-	HMDB0029128	Organic acids and derivatives	Carboxylic acids and derivatives	Amino acids, peptides, and analogues	90965-79-0	519.266	2.50053	2M+Hac-H	C10H18N2O4	0	52.6	metab_16182	neg
neg_7996	Quinestrol	0.000205	0.0003548	1.8286	1.8263	0.5137	-0.9611	yes	C07619	-	-	-	-	-	-	HMDB0015579;LMST02010037	Lipids and lipid-like molecules	Steroids and steroid derivatives	Estrane steroids	152-43-2	401.187	3.22412	M+K-2H	C25H32O2	0	34.6	metab_15465	neg
neg_8166	Medroxalol	3.81e-08	2.08e-07	1.828	1.8261	0.5783	-0.7902	yes	-	-	-	-	-	-	-	HMDB0254407	Benzenoids	Benzene and substituted derivatives	Benzoic acids and derivatives	-	393.142	3.06362	M+Na-2H	C20H24N2O5	0	71.2	metab_15653	neg
pos_2104	Gly Gly Ile	7.29e-10	1.43e-08	1.8243	1.8237	0.7554	-0.4047	yes	-	-	-	-	-	-	-	-	-	-	-	-	246.145	2.27958	M+H	C10H19N3O4	61.6	0	metab_1187	pos
neg_2694	3-dehydrocholate	4.14e-08	2.21e-07	1.8227	1.8211	0.6339	-0.6578	yes	-	-	-	-	-	-	-	HMDB0000502;HMDB0304121	Lipids and lipid-like molecules	Steroids and steroid derivatives	Bile acids, alcohols and derivatives	2304-89-4	426.236	2.96727	M+Na-2H	C24H37O5-	0	45.3	metab_9712	neg
neg_7002	(R)-1-O-[b-D-Glucopyranosyl-(1->6)-b-D-glucopyranoside]-1,3-octanediol	2.92e-16	9.52e-14	1.8218	1.8214	0.615	-0.7014	yes	-	-	-	-	-	-	-	HMDB0032799	Lipids and lipid-like molecules	Fatty Acyls	Fatty acyl glycosides	-	491.215	4.27705	M+Na-2H	C20H38O12	0	63.9	metab_14384	neg
pos_6251	Dansylcadaverine	1.28e-06	6.12e-06	1.8196	1.8194	0.7578	-0.4002	yes	-	-	-	-	-	-	-	HMDB0250850	Benzenoids	Naphthalenes	Naphthalene sulfonic acids and derivatives	-	318.165	2.42017	M+H-H2O	C17H25N3O2S	0	44.6	metab_5634	pos
pos_7621	4,4'-Diaminodibutylamine	1.38e-09	2.44e-08	1.8189	1.8192	1.385	0.4699	yes	C06366	-	-	map01110;map00960;map01064;map01060	Biosynthesis of secondary metabolites;Tropane, piperidine and pyridine alkaloid biosynthesis;Biosynthesis of alkaloids derived from ornithine, lysine and nicotinic acid;Biosynthesis of plant secondary metabolites	Metabolism;Metabolism;Metabolism;Metabolism	Global and overview maps;Biosynthesis of other secondary metabolites;Chemical structure transformation maps;Chemical structure transformation maps	HMDB0031506	Organic nitrogen compounds	Organonitrogen compounds	Amines	4427-76-3	160.181	0.522167	M+H	C8H21N3	0	47.9	metab_7082	pos
neg_6611	LysoPC(0:0/16:0)	1.4e-09	1.35e-08	1.8175	1.8172	0.5905	-0.76	yes	-	-	-	-	-	-	-	HMDB0240262	Lipids and lipid-like molecules	Glycerophospholipids	Glycerophosphocholines	66757-27-5	516.304	4.85472	M+Na-2H	C24H50NO7P	0	50.2	metab_13959	neg
pos_1209	5-Acetamidovalerate	4.61e-08	4.01e-07	1.8165	1.8159	1.3508	0.4338	yes	C03087	-	-	map01100;map00310	Metabolic pathways;Lysine degradation	Metabolism;Metabolism	Global and overview maps;Amino acid metabolism	LMFA01030987;HMDB0012175	Lipids and lipid-like molecules	Fatty Acyls	Fatty acids and conjugates	-	160.097	1.75058	M+H, M+K	C7H13NO3	0	57.3	metab_229	pos
pos_1683	Dmg-mino	2.16e-07	1.41e-06	1.815	1.8135	0.7497	-0.4155	yes	C12011	-	-	-	-	-	-	HMDB0251539;LMPK07000009	Phenylpropanoids and polyketides	Tetracyclines	Not Available	151922-16-6	558.251	1.6882	M+H	C27H35N5O8	0	43.4	metab_736	pos
neg_3180	Histidylarginine	3.85e-07	1.43e-06	1.8135	1.8113	0.6569	-0.6062	yes	-	-	-	-	-	-	-	HMDB0028879	Organic acids and derivatives	Carboxylic acids and derivatives	Amino acids, peptides, and analogues	77369-21-2	681.358	3.54583	2M+Hac-H	C12H21N7O3	0	35.8	metab_10249	neg
pos_3339	N-Nervonoyl Glutamine	0.001984	0.003976	1.8127	1.8121	1.4393	0.5254	yes	-	-	-	-	-	-	-	HMDB0242089	Not Available	Not Available	Not Available	-	477.405	5.67623	M+H-H2O	C29H54N2O4	0	35.5	metab_2504	pos
pos_6014	DL-Alanyl-DL-leucine	1.35e-12	9.78e-11	1.8078	1.8076	0.7508	-0.4135	yes	-	-	-	-	-	-	-	HMDB0251509	Organic acids and derivatives	Carboxylic acids and derivatives	Amino acids, peptides, and analogues	-	468.281	2.74773	2M+ACN+Na	C9H18N2O3	0	55.6	metab_5375	pos
neg_4267	Aplaviroc	2.43e-07	9.67e-07	1.8078	1.8069	1.5935	0.6722	yes	-	-	-	-	-	-	-	HMDB0248516	Organoheterocyclic compounds	Piperidines	Benzylpiperidines	-	598.288	5.28432	M+Na-2H	C33H43N3O6	0	70.3	metab_11432	neg
neg_9396	Hypoxanthine	1.44e-10	2.28e-09	1.8059	1.8051	0.6916	-0.532	yes	C00262	-	-	map01100;map01232;map00230	Metabolic pathways;Nucleotide metabolism;Purine metabolism	Metabolism;Metabolism;Metabolism	Global and overview maps;Global and overview maps;Nucleotide metabolism	PW_C000102;HMDB0000157	Organoheterocyclic compounds	Imidazopyrimidines	Purines and purine derivatives	68-94-0	135.03	1.23982	M-H	C5H4N4O	96.8	0	metab_16978	neg
pos_6145	Asp Ser Leu	1.42e-11	6.24e-10	1.8052	1.8049	0.728	-0.458	yes	-	-	-	-	-	-	-	-	-	-	-	-	334.16	2.5603	M+H	C13H23N3O7	50.4	0	metab_5519	pos
pos_2647	Ile Phe	5.58e-06	2.18e-05	1.8037	1.8048	0.7469	-0.421	yes	-	-	-	-	-	-	-	-	-	-	-	-	279.17	3.53455	M+H	C15H22N2O3	66.4	0	metab_1772	pos
neg_6992	N-({(1s,2r)-2-[(S)-[(1r)-1-{[(Benzyloxy)carbonyl]amino}-2-Phenylethyl](Hydroxy)phosphoryl]cyclopentyl}carbonyl)-L-Tryptophan	1.38e-14	1.59e-12	1.8026	1.8022	0.6213	-0.6867	yes	-	-	-	-	-	-	-	HMDB0257370	Organic acids and derivatives	Carboxylic acids and derivatives	Amino acids, peptides, and analogues	-	598.215	4.29305	M-H2O-H	C33H36N3O7P	0	76.7	metab_14371	neg
neg_9452	N-Acetylmuramate	1.46e-07	6.35e-07	1.8019	1.8016	0.6601	-0.5993	yes	C02713	Carbohydrates	Monosaccharides	map01100;map00520;map02060;map01250	Metabolic pathways;Amino sugar and nucleotide sugar metabolism;Phosphotransferase system (PTS);Biosynthesis of nucleotide sugars	Metabolism;Metabolism;Environmental Information Processing;Metabolism	Global and overview maps;Carbohydrate metabolism;Membrane transport;Global and overview maps	HMDB0060493	Organic oxygen compounds	Organooxygen compounds	Carbohydrates and carbohydrate conjugates	61633-75-8	292.104	1.08007	M-H	C11H19NO8	34.8	0	metab_17038	neg
pos_1446	Prolyl-Arginine	9.28e-08	7.09e-07	1.8018	1.8007	0.7673	-0.3821	yes	-	-	-	-	-	-	-	HMDB0029011	Organic acids and derivatives	Carboxylic acids and derivatives	Amino acids, peptides, and analogues	-	272.171	0.623083	M+H	C11H21N5O3	0	76.3	metab_487	pos
neg_4155	Oxypinnatanine	1.19e-12	5.18e-11	1.7997	1.7992	0.5762	-0.7955	yes	-	-	-	-	-	-	-	HMDB0029403	Organic acids and derivatives	Carboxylic acids and derivatives	Amino acids, peptides, and analogues	52329-55-2	281.073	5.0716	M+Na-2H	C10H16N2O6	0	32.1	metab_11309	neg
neg_6330	Auda	2.12e-14	2.25e-12	1.7991	1.7986	0.6374	-0.6496	yes	-	-	-	-	-	-	-	HMDB0248721	Lipids and lipid-like molecules	Fatty Acyls	Fatty acids and conjugates	-	413.277	5.38715	M+Na-2H	C23H40N2O3	0	30.6	metab_13650	neg
neg_7495	Asimilobine	4.77e-09	3.71e-08	1.7961	1.7952	0.5488	-0.8656	yes	-	-	-	-	-	-	-	HMDB0302145	Alkaloids and derivatives	Aporphines	Not Available	-	288.102	3.73698	M+Na-2H	C17H17NO2	0	41.7	metab_14919	neg
pos_7137	Tyr Lys	4.83e-09	6.57e-08	1.7939	1.7931	0.7668	-0.3831	yes	-	-	-	-	-	-	-	-	-	-	-	-	310.176	1.2709	M+H	C15H23N3O4	69.9	0	metab_6575	pos
neg_2832	1-Isothiocyanatopentane	3.5e-06	9.54e-06	1.7936	1.7927	0.5619	-0.8317	yes	-	-	-	-	-	-	-	HMDB0038433	Organosulfur compounds	Isothiocyanates	Not Available	629-12-9	128.053	3.1361	M-H	C6H11NS	0	34.4	metab_9865	neg
neg_2535	Puromycin	1.16e-15	2.32e-13	1.7927	1.7923	0.6089	-0.7158	yes	C01610	-	-	map01100;map01110;map00998	Metabolic pathways;Biosynthesis of secondary metabolites;Biosynthesis of various antibiotics	Metabolism;Metabolism;Metabolism	Global and overview maps;Global and overview maps;Biosynthesis of other secondary metabolites	HMDB0256926	Nucleosides, nucleotides, and analogues	Purine nucleosides	Purine 3''-deoxyribonucleosides	53-79-2	508.168	2.7579	M+K-2H	C22H29N7O5	0	65.5	metab_9538	neg
pos_6784	Mpomeovt	8.88e-05	0.000244	1.7924	1.7927	1.345	0.4276	yes	-	-	-	-	-	-	-	HMDB0254916	Organic acids and derivatives	Carboxylic acids and derivatives	Amino acids, peptides, and analogues	-	549.246	1.87515	M+H+Na	C48H74N12O12S2	0	92.9	metab_6195	pos
neg_9251	7-Methyladenine	1.23e-07	5.48e-07	1.79	1.7871	0.5845	-0.7747	yes	C02241	-	-	-	-	-	-	HMDB0011614	Organoheterocyclic compounds	Imidazopyrimidines	Purines and purine derivatives	935-69-3	148.062	1.71512	M-H	C6H7N5	70.4	0	metab_16831	neg
neg_1646	Urocanic Acid	2.07e-10	2.96e-09	1.7895	1.7889	0.5579	-0.842	yes	C00785	-	-	map01100;map00340	Metabolic pathways;Histidine metabolism	Metabolism;Metabolism	Global and overview maps;Amino acid metabolism	HMDB0000301;HMDB0062562;PW_C000205;MJDBOTE0000716	Organoheterocyclic compounds	Azoles	Imidazoles	104-98-3;3465-72-3	137.035	0.640783	M-H	C6H6N2O2	82.8	0	metab_8592	neg
pos_1095	Val Arg	1.41e-05	4.83e-05	1.788	1.7879	0.7216	-0.4707	yes	-	-	-	-	-	-	-	-	-	-	-	-	274.187	1.12252	M+2H, M+H	C11H23N5O3	35.7	0	metab_104	pos
neg_7509	Nummularine A	0.0003686	0.0006054	1.7872	1.7802	0.5936	-0.7525	yes	C10011	-	-	-	-	-	-	HMDB0029336	Organic acids and derivatives	Carboxylic acids and derivatives	Amino acids, peptides, and analogues	53947-95-8	682.341	3.713	M+Cl	C36H49N5O6	0	52.4	metab_14935	neg
pos_2166	Ser Leu Asp	2.42e-05	7.78e-05	1.7839	1.7845	0.7328	-0.4484	yes	-	-	-	-	-	-	-	-	-	-	-	-	334.16	2.38105	M+H	C13H23N3O7	46.7	0	metab_1254	pos
neg_8056	PGP(i-12:0/PGF1alpha)	4.05e-08	2.19e-07	1.7836	1.7828	0.6506	-0.6201	yes	-	-	-	-	-	-	-	HMDB0274881	Not Available	Not Available	Not Available	-	881.401	3.1601	M+Cl	C38H72O16P2	0	61.7	metab_15532	neg
pos_254	Cytosine	1.16e-05	4.05e-05	1.7797	1.7778	0.7379	-0.4385	yes	C00380	Nucleic acids	Bases	map00240;map01100;map01232	Pyrimidine metabolism;Metabolic pathways;Nucleotide metabolism	Metabolism;Metabolism;Metabolism	Nucleotide metabolism;Global and overview maps;Global and overview maps	HMDB0000630;MJDBOTE0000458	Organoheterocyclic compounds	Diazines	Pyrimidines and pyrimidine derivatives	71-30-7	112.051	0.599817	M+H, M+K, M+Na	C4H5N3O	57.9	0	metab_1657	pos
neg_8753	Bursin	4.36e-06	1.16e-05	1.7789	1.776	0.6022	-0.7318	yes	-	-	-	-	-	-	-	HMDB0249447	Organic acids and derivatives	Carboxylic acids and derivatives	Amino acids, peptides, and analogues	-	360.178	2.37202	M+Na-2H	C14H25N7O3	0	41.2	metab_16294	neg
pos_5923	Pro Pro Val	1.15e-07	8.46e-07	1.7762	1.7768	0.7285	-0.457	yes	-	-	-	-	-	-	-	-	-	-	-	-	312.191	2.9038	M+H	C15H25N3O4	69.4	0	metab_5278	pos
neg_2024	Ribostamycin	6.19e-17	3.02e-14	1.7756	1.7752	0.6302	-0.6662	yes	C01759	-	-	map01110;map00524	Biosynthesis of secondary metabolites;Neomycin, kanamycin and gentamicin biosynthesis	Metabolism;Metabolism	Global and overview maps;Biosynthesis of other secondary metabolites	HMDB0257216	Organic oxygen compounds	Organooxygen compounds	Carbohydrates and carbohydrate conjugates	25546-65-0	489.195	1.85948	M+Cl	C17H34N4O10	0	89.1	metab_8983	neg
neg_6609	Di-deacetyl adrogolide	7.82e-11	1.41e-09	1.7752	1.775	0.5752	-0.7979	yes	-	-	-	-	-	-	-	HMDB0247722	Organoheterocyclic compounds	Quinolines and derivatives	Quinolones and derivatives	-	336.102	4.86122	M+Na-2H	C18H21NO2S	0	47.8	metab_13956	neg
pos_6623	PI(PGJ2/22:5(4Z,7Z,10Z,13Z,16Z))	6.3e-10	1.26e-08	1.7748	1.775	0.7713	-0.3747	yes	-	-	-	-	-	-	-	HMDB0278138	Not Available	Not Available	Not Available	-	504.247	1.95283	M+2Na	C51H79O15P	0	35.2	metab_6029	pos
pos_6089	(2,5-Dihydroxypyrrol-1-yl) 4-[(2,5-dioxopyrrol-1-yl)methyl]cyclohexane-1-carboxylate	1.47e-06	6.91e-06	1.7746	1.777	0.7423	-0.4299	yes	-	-	-	-	-	-	-	HMDB0242490	Organoheterocyclic compounds	Pyrrolidines	Pyrrolidones	-	352.15	2.63835	M+NH4	C16H18N2O6	0	57.7	metab_5457	pos
neg_8855	2-(Arabinosylamino)-3-(glucosylamino)propanenitrile	2.26e-06	6.52e-06	1.7725	1.7713	0.6265	-0.6746	yes	-	-	-	-	-	-	-	HMDB0039505	Organic oxygen compounds	Organooxygen compounds	Carbohydrates and carbohydrate conjugates	26401-22-9	360.141	2.26802	M-H2O-H	C14H25N3O9	0	36.1	metab_16407	neg
pos_2203	N(6)-6(R,S)-lipoyl-L-lysine	1.72e-06	7.91e-06	1.7709	1.7727	0.7369	-0.4404	yes	-	-	-	-	-	-	-	HMDB0255285	Organoheterocyclic compounds	Dithiolanes	Lipoamides	-	376.171	2.4358	M+ACN+H	C14H26N2O3S2	0	49.1	metab_1295	pos
neg_6392	3-trans-p-Coumaroylrotundic acid	7.28e-11	1.32e-09	1.7667	1.7659	0.6117	-0.7091	yes	-	-	-	-	-	-	-	HMDB0040667	Lipids and lipid-like molecules	Prenol lipids	Triterpenoids	144624-03-3	615.372	5.28432	M-H2O-H	C39H54O7	0	74	metab_13716	neg
pos_6644	Benzene	4.01e-10	8.84e-09	1.7646	1.764	0.7411	-0.4322	yes	C01407	-	-	map01100;map01220;map01120;map05208;map00362;map00361	Metabolic pathways;Degradation of aromatic compounds;Microbial metabolism in diverse environments;Chemical carcinogenesis - reactive oxygen species;Benzoate degradation;Chlorocyclohexane and chlorobenzene degradation	Metabolism;Metabolism;Metabolism;Human Diseases;Metabolism;Metabolism	Global and overview maps;Global and overview maps;Global and overview maps;Cancer: overview;Xenobiotics biodegradation and metabolism;Xenobiotics biodegradation and metabolism	HMDB0001505	Benzenoids	Benzene and substituted derivatives	Not Available	71-43-2	79.0546	1.93727	M+H	C6H6	0	38.9	metab_6051	pos
neg_6299	CDP-DG(22:5(7Z,10Z,13Z,16Z,19Z)/PGJ2)	2.66e-06	7.52e-06	1.7644	1.7644	1.6428	0.7161	yes	-	-	-	-	-	-	-	HMDB0292563	Not Available	Not Available	Not Available	-	551.75	5.4309	M-2H	C54H81N3O17P2	0	37.7	metab_13615	neg
pos_5921	4-(Phenylamino)benzoic acid	5.31e-10	1.11e-08	1.7638	1.7639	1.3838	0.4686	yes	C13697	-	-	-	-	-	-	HMDB0246312;HMDB0255225	Benzenoids	Benzene and substituted derivatives	Benzoic acids and derivatives	-	231.113	2.91162	M+NH4	C13H11NO2	0	43	metab_5276	pos
neg_10277	Lysyllysine	9.15e-12	2.64e-10	1.7611	1.7607	0.5735	-0.8021	yes	-	-	-	-	-	-	-	HMDB0304785;HMDB0028956	Organic acids and derivatives	Carboxylic acids and derivatives	Amino acids, peptides, and analogues	13184-13-9	273.193	0.448517	M-H	C12H26N4O3	0	41.3	metab_7825	neg
neg_7458	L-Canaline	3.25e-08	1.83e-07	1.7586	1.761	0.6197	-0.6904	yes	C08270	-	-	-	-	-	-	HMDB0012251	Organic acids and derivatives	Carboxylic acids and derivatives	Amino acids, peptides, and analogues	496-93-5	401.204	3.76898	3M-H	C4H10N2O3	0	50.7	metab_14880	neg
neg_6636	Histidyltryptophan	1.34e-12	5.74e-11	1.7574	1.757	0.6407	-0.6424	yes	-	-	-	-	-	-	-	HMDB0028896	Organic acids and derivatives	Carboxylic acids and derivatives	Amino acids, peptides, and analogues	23403-90-9	362.121	4.81178	M+Na-2H	C17H19N5O3	0	53.4	metab_13986	neg
neg_4490	PS(18:4(6Z,9Z,12Z,15Z)/20:5(5Z,8Z,10E,14Z,17Z)-OH(12))	2.27e-06	6.54e-06	1.7476	1.7455	1.5862	0.6655	yes	-	-	-	-	-	-	-	HMDB0282005	Not Available	Not Available	Not Available	-	852.415	5.57185	M+Cl	C44H68NO11P	0	73	metab_11677	neg
neg_2135	Lomefloxacin	5.85e-13	2.85e-11	1.7449	1.7443	0.6402	-0.6434	yes	C07078	-	-	-	-	-	-	HMDB0015113	Organoheterocyclic compounds	Lactams	Beta lactams	98079-51-7	701.275	2.0839	2M-H	C17H19F2N3O3	0	81.6	metab_9103	neg
neg_2898	PGP(22:6(5Z,8E,10Z,13Z,15E,19Z)-2OH(7S, 17S)/20:2(11Z,14Z))	5.78e-09	4.35e-08	1.7446	1.745	0.6605	-0.5983	yes	-	-	-	-	-	-	-	HMDB0273400	Not Available	Not Available	Not Available	-	993.465	3.20812	M+Cl	C48H80O15P2	0	33.5	metab_9936	neg
neg_8096	Dehydroandrographolide succinate	0.0002702	0.0004556	1.7423	1.7378	0.5974	-0.7433	yes	-	-	-	-	-	-	-	HMDB0250944	Lipids and lipid-like molecules	Prenol lipids	Terpene lactones	-	577.226	3.12012	M+FA-H	C28H36O10	0	88	metab_15576	neg
neg_7892	Latrunculin B	8.33e-11	1.48e-09	1.7423	1.7422	0.6934	-0.5282	yes	C19904	-	-	-	-	-	-	HMDB0253990	Phenylpropanoids and polyketides	Macrolides and analogues	Not Available	76343-94-7	789.343	3.32062	2M-H	C20H29NO5S	0	73.6	metab_15351	neg
neg_112	Leucinic Acid	2.82e-08	1.62e-07	1.7402	1.7415	0.643	-0.6371	yes	-	-	-	-	-	-	-	HMDB0000665;LMFA01050381	Lipids and lipid-like molecules	Fatty Acyls	Fatty acids and conjugates	498-36-2	177.076	4.33305	M+FA-H, 2M-H, M-H2O-H	C6H12O3	51.9	0	metab_8013	neg
pos_131	(S)-scoulerine	2.61e-09	4.06e-08	1.7394	1.7395	0.7923	-0.336	yes	C02106	-	-	map00950;map01100;map01110;map01063	Isoquinoline alkaloid biosynthesis;Metabolic pathways;Biosynthesis of secondary metabolites;Biosynthesis of alkaloids derived from shikimate pathway	Metabolism;Metabolism;Metabolism;Metabolism	Biosynthesis of other secondary metabolites;Global and overview maps;Global and overview maps;Chemical structure transformation maps	HMDB0304001	Alkaloids and derivatives	Protoberberine alkaloids and derivatives	Not Available	6451-73-6	696.33	1.922	M+H, 2M+ACN+H, M+H-H2O	C19H21NO4	0	41.8	metab_341	pos
neg_3588	(-)-trans-Carveol glucoside	4.1e-09	3.31e-08	1.7393	1.741	0.5993	-0.7386	yes	-	-	-	-	-	-	-	HMDB0029848	Lipids and lipid-like molecules	Prenol lipids	Terpene glycosides	113349-30-7	349.14	4.07703	M+Cl	C16H26O6	0	35.1	metab_10694	neg
pos_466	Isamoxole	9.75e-11	2.82e-09	1.7379	1.7371	0.7983	-0.3249	yes	-	-	-	-	-	-	-	HMDB0253591	Organoheterocyclic compounds	Azoles	Oxazoles	-	242.186	2.03025	M+H, M+NH4	C12H20N2O2	0	31.4	metab_3951	pos
neg_8871	Carboquone	2.97e-10	3.95e-09	1.7374	1.7378	0.6162	-0.6984	yes	-	-	-	-	-	-	-	HMDB0249646	Organic oxygen compounds	Organooxygen compounds	Carbonyl compounds	-	366.131	2.25203	M+FA-H	C15H19N3O5	0	45	metab_16425	neg
pos_6414	Gibberellin A12	2.51e-08	2.44e-07	1.7372	1.738	1.2774	0.3532	yes	C11857	-	-	map01100;map00904;map01110	Metabolic pathways;Diterpenoid biosynthesis;Biosynthesis of secondary metabolites	Metabolism;Metabolism;Metabolism	Global and overview maps;Metabolism of terpenoids and polyketides;Global and overview maps	LMPR0104170014;HMDB0301912;HMDB0303453	Lipids and lipid-like molecules	Prenol lipids	Diterpenoids	1164-45-0	355.186	2.21723	M+Na	C20H28O4	0	50.4	metab_5813	pos
neg_7387	Dynorphin B (6-9)	4.06e-07	1.5e-06	1.7371	1.7358	0.6401	-0.6437	yes	-	-	-	-	-	-	-	HMDB0012937	Organic acids and derivatives	Carboxylic acids and derivatives	Amino acids, peptides, and analogues	-	626.315	3.85717	M+Na-2H	C26H43N11O6	0	78	metab_14802	neg
neg_4312	3-Fluorophenmetrazine	5.81e-07	2.03e-06	1.7363	1.7336	0.6207	-0.6881	yes	-	-	-	-	-	-	-	HMDB0244559	Organoheterocyclic compounds	Oxazinanes	Morpholines	-	435.21	5.36468	2M+FA-H	C11H14FNO	0	30.2	metab_11483	neg
neg_1915	(1R,2S,3R)-2-Acetyl-4(5)-(1,2,3,4-tetrahydroxybutyl)imidazole	1.47e-17	1.43e-14	1.7347	1.7344	0.6104	-0.7122	yes	-	-	-	-	-	-	-	HMDB0029756	Organic oxygen compounds	Organooxygen compounds	Carbonyl compounds	94944-70-4	275.088	1.47718	M+FA-H	C9H14N2O5	0	31.1	metab_8868	neg
pos_126	(-)-Guttiferone E	1.43e-07	1e-06	1.7306	1.7299	0.7792	-0.3599	yes	C09929	-	-	-	-	-	-	HMDB0039154	Lipids and lipid-like molecules	Prenol lipids	Monoterpenoids	78824-30-3	324.171	1.89858	M+2Na, M+2Na-H, M+H+Na	C38H50O6	0	34.5	metab_285	pos
neg_6911	Lipoyllysine	1.52e-08	9.69e-08	1.7297	1.7296	0.6197	-0.6903	yes	-	-	-	-	-	-	-	HMDB0012996	Organoheterocyclic compounds	Dithiolanes	Lipoamides	20902-53-8	315.12	4.38905	M-H2O-H	C14H26N2O3S2	0	44.6	metab_14288	neg
pos_6331	Asn Glu Leu	1.79e-08	1.84e-07	1.7297	1.7288	0.7826	-0.3536	yes	-	-	-	-	-	-	-	-	-	-	-	-	375.187	2.31858	M+H	C15H26N4O7	44.9	0	metab_5723	pos
pos_2565	N-Formyl-met-leu-phe-lys	0.0007367	0.001615	1.7294	1.73	1.3322	0.4138	yes	-	-	-	-	-	-	-	HMDB0252432	Organic acids and derivatives	Carboxylic acids and derivatives	Amino acids, peptides, and analogues	-	530.281	3.1847	M+H-2H2O	C27H43N5O6S	0	70.2	metab_1685	pos
neg_7568	Subaphylline	1.47e-11	3.85e-10	1.7271	1.727	0.5955	-0.7479	yes	C10497	-	-	map01100;map00330	Metabolic pathways;Arginine and proline metabolism	Metabolism;Metabolism	Global and overview maps;Amino acid metabolism	HMDB0033463	Phenylpropanoids and polyketides	Cinnamic acids and derivatives	Hydroxycinnamic acids and derivatives	501-13-3	573.289	3.64232	2M+FA-H	C14H20N2O3	0	61	metab_15000	neg
pos_6167	Val Glu Val	1.77e-07	1.19e-06	1.7267	1.7246	0.7553	-0.405	yes	-	-	-	-	-	-	-	-	-	-	-	-	346.197	2.53683	M+H	C15H27N3O6	47.4	0	metab_5543	pos
pos_494	2-O-alpha-D-Glucopyranosyl-O-beta-D-galactopyranosylhydroxylysine	5.98e-10	1.21e-08	1.7225	1.7225	0.7945	-0.3319	yes	-	-	-	-	-	-	-	HMDB0246739;HMDB0000585	Lipids and lipid-like molecules	Fatty Acyls	Fatty acyl glycosides	32448-35-4	519.241	2.17037	M+H-2H2O, M+CH3OH+H	C18H34N2O13	0	68.5	metab_4258	pos
neg_8552	Beta-Zearalenol	4.25e-09	3.39e-08	1.722	1.7208	0.6761	-0.5648	yes	C14751	-	-	-	-	-	-	HMDB0041838;HMDB0041824	Phenylpropanoids and polyketides	Macrolides and analogues	Not Available	36455-72-8;71030-11-0	699.344	2.62952	2M+Hac-H	C18H24O5	0	52.1	metab_17600	neg
pos_1560	Pentostatin	3.02e-10	6.98e-09	1.721	1.7207	0.7933	-0.3341	yes	C02267	-	-	-	-	-	-	HMDB0014692;HMDB0245535	Organoheterocyclic compounds	Imidazodiazepines	Not Available	53910-25-1	286.15	1.1069	M+NH4	C11H16N4O4	0	51.8	metab_610	pos
neg_8090	5-Isothiocyanato-1-pentene	5.5e-07	1.94e-06	1.7209	1.719	0.6389	-0.6463	yes	-	-	-	-	-	-	-	HMDB0034300	Organosulfur compounds	Isothiocyanates	Not Available	18060-79-2	172.043	3.1361	M+FA-H	C6H9NS	0	48.7	metab_15570	neg
neg_3959	PC(2:0/20:4(6Z,8E,10E,14Z)-2OH(5S,12R))	6.06e-07	2.1e-06	1.7172	1.7168	1.5388	0.6218	yes	-	-	-	-	-	-	-	HMDB0288838	Not Available	Not Available	Not Available	-	654.278	4.64595	M+K-2H	C30H52NO10P	0	59.2	metab_11092	neg
pos_5989	Ile Leu	4.33e-10	9.35e-09	1.7167	1.7166	0.7933	-0.3341	yes	-	-	-	-	-	-	-	-	-	-	-	-	245.186	2.79463	M+H	C12H24N2O3	66.7	0	metab_5346	pos
neg_6084	N-Acetyl-3-hydroxyprocainamide	3.73e-06	1.01e-05	1.7167	1.7193	0.6195	-0.6908	yes	-	-	-	-	-	-	-	HMDB0060996	Benzenoids	Benzene and substituted derivatives	Benzoic acids and derivatives	-	631.346	5.59585	2M+FA-H	C15H23N3O3	0	56.9	metab_13383	neg
pos_1485	(-)-Slaframine	7.64e-08	6.08e-07	1.7164	1.7175	1.3816	0.4664	yes	C06185	-	-	map01110;map00960;map01064	Biosynthesis of secondary metabolites;Tropane, piperidine and pyridine alkaloid biosynthesis;Biosynthesis of alkaloids derived from ornithine, lysine and nicotinic acid	Metabolism;Metabolism;Metabolism	Global and overview maps;Biosynthesis of other secondary metabolites;Chemical structure transformation maps	HMDB0243523	Organoheterocyclic compounds	Indolizidines	Not Available	20084-93-9	216.17	0.8022	M+NH4	C10H18N2O2	0	47.9	metab_528	pos
neg_4568	Bufogenin	5.82e-11	1.11e-09	1.7163	1.7155	0.6284	-0.6703	yes	-	-	-	-	-	-	-	LMST01130031;HMDB0249430	Lipids and lipid-like molecules	Steroids and steroid derivatives	Steroid lactones	-	421.176	5.63635	M+K-2H	C24H32O4	0	50.2	metab_11760	neg
pos_2353	4-(1-Hydroxy-2-{[1-(4-hydroxyphenyl)propan-2-yl]amino}ethyl)benzene-1,2-diol	4.59e-07	2.6e-06	1.7156	1.7142	0.7683	-0.3802	yes	-	-	-	-	-	-	-	HMDB0245699	Benzenoids	Benzene and substituted derivatives	Phenethylamines	-	624.334	2.7244	2M+NH4	C17H21NO4	0	44.6	metab_1456	pos
neg_6893	Fluvoxamine	5.53e-11	1.07e-09	1.7147	1.7148	0.6548	-0.6109	yes	C07571	-	-	-	-	-	-	HMDB0014322	Benzenoids	Benzene and substituted derivatives	Trifluoromethylbenzenes	54739-18-3	635.308	4.40507	2M-H	C15H21F3N2O2	0	34.2	metab_14268	neg
pos_5864	Salmefamol	1.97e-06	8.87e-06	1.712	1.7117	1.3157	0.3958	yes	C11771	-	-	-	-	-	-	HMDB0257468	Benzenoids	Benzene and substituted derivatives	Phenethylamines	18910-65-1	354.165	2.97402	M+Na	C19H25NO4	0	35.4	metab_5214	pos
pos_5828	Gly Pro Phe	1.2e-07	8.77e-07	1.7103	1.7109	0.7759	-0.3661	yes	-	-	-	-	-	-	-	-	-	-	-	-	320.16	3.04425	M+H	C16H21N3O4	59.3	0	metab_5175	pos
pos_2112	SENECIPHYLLINE	9.47e-08	7.23e-07	1.7084	1.7063	0.8023	-0.3178	yes	C10391	-	-	-	-	-	-	HMDB0258231	Alkaloids and derivatives	Not Available	Not Available	480-81-9	730.335	2.28742	2M+ACN+Na	C18H23NO5	0	55.8	metab_1196	pos
pos_1118	Pro Thr	6.82e-11	2.13e-09	1.706	1.7053	0.8016	-0.319	yes	-	-	-	-	-	-	-	-	-	-	-	-	217.118	1.26308	M+H, M+K	C9H16N2O4	72.1	0	metab_130	pos
neg_7850	Capsidiol	1.32e-05	3.04e-05	1.7045	1.7057	1.7286	0.7896	yes	C09627	-	-	map00909	Sesquiterpenoid and triterpenoid biosynthesis	Metabolism	Metabolism of terpenoids and polyketides	HMDB0002352;LMPR0103250002	Lipids and lipid-like molecules	Prenol lipids	Sesquiterpenoids	37208-05-2	257.151	3.3692	M+Na-2H	C15H24O2	0	34.8	metab_15307	neg
pos_2251	Neuromedin N (1-4)	2.17e-08	2.18e-07	1.6991	1.699	0.804	-0.3148	yes	-	-	-	-	-	-	-	HMDB0013021	Lipids and lipid-like molecules	Fatty Acyls	Fatty acyl thioesters	-	527.281	2.52915	M+Na	C26H40N4O6	0	45.9	metab_1345	pos
pos_6270	Ser Val Tyr	1.23e-07	8.91e-07	1.6977	1.6983	0.7586	-0.3985	yes	-	-	-	-	-	-	-	-	-	-	-	-	368.181	2.39672	M+H	C17H25N3O6	52.5	0	metab_5655	pos
neg_4052	Epothilone C	2.32e-12	8.73e-11	1.6975	1.697	0.6199	-0.69	yes	C15694	-	-	-	-	-	-	HMDB0251875	Phenylpropanoids and polyketides	Macrolides and analogues	Epothilones and analogues	-	522.257	4.82993	M+FA-H	C26H39NO5S	0	78.6	metab_11196	neg
neg_3883	Posatirelin	0.0006487	0.001017	1.6971	1.7016	0.5733	-0.8026	yes	-	-	-	-	-	-	-	HMDB0256710	Organic acids and derivatives	Carboxylic acids and derivatives	Amino acids, peptides, and analogues	-	397.209	4.50108	M+FA-H	C17H28N4O4	0	43.7	metab_11010	neg
pos_6533	L-Coprine	1.34e-09	2.4e-08	1.6937	1.6925	0.8111	-0.3021	yes	C08271	-	-	-	-	-	-	HMDB0034266	Organic acids and derivatives	Carboxylic acids and derivatives	Amino acids, peptides, and analogues	58919-61-2	446.224	2.06152	2M+ACN+H	C8H14N2O4	0	74.3	metab_5938	pos
pos_6991	N6-beta-Aspartyllysine	3.05e-08	2.87e-07	1.6916	1.6901	0.7866	-0.3463	yes	-	-	-	-	-	-	-	HMDB0004985	Organic acids and derivatives	Carboxylic acids and derivatives	Amino acids, peptides, and analogues	5853-83-8	303.166	1.72718	M+ACN+H	C10H19N3O5	0	36.5	metab_6422	pos
neg_6643	PA(8:0/i-12:0)	2.06e-14	2.22e-12	1.6911	1.6907	0.6267	-0.6742	yes	C00416	Lipids	Phospholipids	map01100;map00564;map01110;map00561;map05212;map05200;map04975;map04024;map05231;map04072;map04912;map04070;map04666	Metabolic pathways;Glycerophospholipid metabolism;Biosynthesis of secondary metabolites;Glycerolipid metabolism;Pancreatic cancer;Pathways in cancer;Fat digestion and absorption;cAMP signaling pathway;Choline metabolism in cancer;Phospholipase D signaling pathway;GnRH signaling pathway;Phosphatidylinositol signaling system;Fc gamma R-mediated phagocytosis	Metabolism;Metabolism;Metabolism;Metabolism;Human Diseases;Human Diseases;Organismal Systems;Environmental Information Processing;Human Diseases;Environmental Information Processing;Organismal Systems;Environmental Information Processing;Organismal Systems	Global and overview maps;Lipid metabolism;Global and overview maps;Lipid metabolism;Cancer: specific types;Cancer: overview;Digestive system;Signal transduction;Cancer: overview;Signal transduction;Endocrine system;Signal transduction;Immune system	HMDB0115685;PW_C064070	Lipids and lipid-like molecules	Glycerophospholipids	Glycerophosphates	-	501.256	4.79413	M+Na-2H	C23H45O8P	0	40	metab_13994	neg
neg_3863	(+)-Isofebrifugine	1.7e-07	7.14e-07	1.6911	1.6911	0.6766	-0.5635	yes	-	-	-	-	-	-	-	HMDB0242253	Organoheterocyclic compounds	Diazanaphthalenes	Benzodiazines	-	346.144	4.46122	M+FA-H	C16H19N3O3	0	55.6	metab_10988	neg
pos_6866	Betavulgaroside VII	2.97e-09	4.45e-08	1.6904	1.6906	0.7939	-0.333	yes	-	-	-	-	-	-	-	HMDB0033427	Lipids and lipid-like molecules	Prenol lipids	Terpene glycosides	178535-51-8	406.205	1.7661	M+2H	C41H62O16	0	55.5	metab_6285	pos
pos_1444	Pro His	2.62e-09	4.06e-08	1.6891	1.6885	0.7774	-0.3633	yes	-	-	-	-	-	-	-	-	-	-	-	-	253.129	0.623083	M+H	C11H16N4O3	74.7	0	metab_486	pos
pos_2522	Cromakalim	6.02e-11	1.92e-09	1.689	1.6887	0.756	-0.4035	yes	C11819	-	-	-	-	-	-	HMDB0250542	Organoheterocyclic compounds	Benzopyrans	1-benzopyrans	94470-67-4	304.165	3.08315	M+NH4	C16H18N2O3	0	54.2	metab_1640	pos
neg_4513	Evobioside	5.67e-07	1.99e-06	1.6881	1.686	0.6511	-0.6189	yes	-	-	-	-	-	-	-	HMDB0038020	Organoheterocyclic compounds	Furans	Furoic acid and derivatives	79435-42-0	703.331	5.58785	M+Na-2H	C35H54O13	0	80.3	metab_11702	neg
pos_6604	Casomorphin	4.81e-07	2.71e-06	1.6839	1.6839	1.2539	0.3265	yes	-	-	-	-	-	-	-	HMDB0059787	Organic acids and derivatives	Carboxylic acids and derivatives	Amino acids, peptides, and analogues	-	443.716	1.98375	M+H+Na	C44H61N7O11	0	44.6	metab_6009	pos
pos_6412	PS(22:5(4Z,7Z,10Z,13Z,16Z)/22:6(4Z,7Z,10Z,13Z,16Z,19Z))	1.23e-06	5.89e-06	1.6828	1.6832	1.2659	0.3402	yes	C02737	Lipids	Phospholipids	map01100;map00564;map01110;map05146;map05322;map00260;map05140	Metabolic pathways;Glycerophospholipid metabolism;Biosynthesis of secondary metabolites;Amoebiasis;Systemic lupus erythematosus;Glycine, serine and threonine metabolism;Leishmaniasis	Metabolism;Metabolism;Metabolism;Human Diseases;Human Diseases;Metabolism;Human Diseases	Global and overview maps;Lipid metabolism;Global and overview maps;Infectious disease: parasitic;Immune disease;Amino acid metabolism;Infectious disease: parasitic	PW_C061273;HMDB0112837	Lipids and lipid-like molecules	Glycerophospholipids	Glycerophosphoserines	-	463.75	2.21723	M+2Na	C50H76NO10P	0	30.6	metab_5811	pos
neg_2270	N-[3,3-Dimethyl-1-(methylamino)-1-oxobutan-2-yl]-N'-hydroxy-3-(hydroxymethyl)-2-(4-methoxyphenyl)butanediamide	1.69e-09	1.59e-08	1.6822	1.6826	0.6726	-0.5721	yes	-	-	-	-	-	-	-	HMDB0260415	Organic acids and derivatives	Carboxylic acids and derivatives	Amino acids, peptides, and analogues	-	416.179	2.34802	M+Na-2H	C19H29N3O6	0	38.7	metab_9250	neg
neg_6667	Glu Ile Phe Lys	8.57e-07	2.82e-06	1.6817	1.6824	0.6394	-0.6453	yes	-	-	-	-	-	-	-	-	-	-	-	-	534.293	4.7522	M-H	C26H41N5O7	41.6	0	metab_14020	neg
pos_6536	Phenylalanyllysine	4.85e-12	2.62e-10	1.6807	1.6802	0.7966	-0.3281	yes	-	-	-	-	-	-	-	HMDB0029000	Organic acids and derivatives	Carboxylic acids and derivatives	Amino acids, peptides, and analogues	6456-72-0	276.17	2.06152	M+H-H2O	C15H23N3O3	0	52.3	metab_5941	pos
pos_9	N-gamma-L-Glutamyl-D-alanine	1.61e-06	7.45e-06	1.6793	1.678	0.7963	-0.3287	yes	-	-	-	-	-	-	-	HMDB0036301	Organic acids and derivatives	Carboxylic acids and derivatives	Amino acids, peptides, and analogues	-	219.097	0.623083	M+H, M+Na, M+ACN+H, M+ACN+Na, M+K, M+H-H2O	C8H14N2O5	0	57.7	metab_7376	pos
neg_4609	Deoxycholylarginine	2.17e-12	8.34e-11	1.679	1.679	1.5346	0.6178	yes	-	-	-	-	-	-	-	HMDB0242418	Not Available	Not Available	Not Available	-	547.387	5.66032	M-H	C30H52N4O5	0	61.2	metab_11806	neg
neg_2689	L-Agaritine	3.02e-10	3.97e-09	1.6772	1.6764	0.6826	-0.5509	yes	-	-	-	-	-	-	-	HMDB0033758	Organic acids and derivatives	Carboxylic acids and derivatives	Amino acids, peptides, and analogues	-	533.236	2.95932	2M-H	C12H17N3O4	0	36	metab_9706	neg
neg_6470	BATRACHOTOXIN	2.69e-11	6.05e-10	1.6768	1.6763	0.6409	-0.6418	yes	C13750	-	-	-	-	-	-	HMDB0248882	Organoheterocyclic compounds	Pyrroles	Pyrrole carboxylic acids and derivatives	23509-16-2	573.271	5.16667	M+Cl	C31H42N2O6	0	31.4	metab_13803	neg
neg_8058	Val-Pro-Asp-Pro-Arg	6.07e-08	3.05e-07	1.6756	1.6728	0.6837	-0.5485	yes	-	-	-	-	-	-	-	HMDB0244421	Organic acids and derivatives	Carboxylic acids and derivatives	Amino acids, peptides, and analogues	-	627.311	3.1601	M+FA-H	C25H42N8O8	0	78.9	metab_15534	neg
neg_7463	Cyclo(aspartylleucylthreonylvalyltyrosylphenylalanylglycyl)	2.68e-10	3.65e-09	1.6723	1.6716	0.7066	-0.5011	yes	-	-	-	-	-	-	-	HMDB0303713	Organic acids and derivatives	Carboxylic acids and derivatives	Amino acids, peptides, and analogues	-	794.369	3.76098	M-H	C39H53N7O11	0	76	metab_14886	neg
neg_3808	2-O-alpha-D-Galactopyranosyl-1-deoxynojirimycin	2.67e-11	6.05e-10	1.6676	1.6673	0.6477	-0.6265	yes	-	-	-	-	-	-	-	HMDB0041337	Organic oxygen compounds	Organooxygen compounds	Carbohydrates and carbohydrate conjugates	155168-05-1	360.106	4.37305	M+Cl	C12H23NO9	0	35.9	metab_10932	neg
neg_542	Prolyl-Asparagine	1.58e-11	4.06e-10	1.6668	1.6652	0.7182	-0.4776	yes	-	-	-	-	-	-	-	HMDB0029012	Organic acids and derivatives	Carboxylic acids and derivatives	Amino acids, peptides, and analogues	-	517.227	2.8224	2M-H, 2M+Hac-H	C9H15N3O4	0	74.6	metab_12674	neg
pos_6143	Cadabicine	1.15e-05	4.04e-05	1.6664	1.6658	1.2945	0.3724	yes	-	-	-	-	-	-	-	HMDB0033451	Organic oxygen compounds	Organooxygen compounds	Ethers	99964-83-7	458.207	2.5603	M+Na	C25H29N3O4	0	75.1	metab_5517	pos
neg_160	D-Sorbitol	9.83e-07	3.18e-06	1.6657	1.6654	0.6342	-0.6569	yes	C00794	Carbohydrates	Monosaccharides	map01100;map02010;map00051;map00052;map02060;map05415	Metabolic pathways;ABC transporters;Fructose and mannose metabolism;Galactose metabolism;Phosphotransferase system (PTS);Diabetic cardiomyopathy	Metabolism;Environmental Information Processing;Metabolism;Metabolism;Environmental Information Processing;Human Diseases	Global and overview maps;Membrane transport;Carbohydrate metabolism;Carbohydrate metabolism;Membrane transport;Cardiovascular disease	HMDB0000247;MJDBOTE0001050	Organic oxygen compounds	Organooxygen compounds	Carbohydrates and carbohydrate conjugates	50-70-4	181.071	0.568333	M-H, M+FA-H, M+Cl	C6H14O6	52.2	0	metab_8541	neg
pos_6185	Piperdial	1.3e-05	4.5e-05	1.6641	1.6633	0.7675	-0.3817	yes	C09711	-	-	-	-	-	-	HMDB0035798	Organic oxygen compounds	Organooxygen compounds	Alcohols and polyols	100288-36-6	295.128	2.49008	M+2Na-H	C15H22O3	0	48.9	metab_5562	pos
neg_7847	Shanzhiside methyl ester	1.24e-05	2.88e-05	1.6623	1.6642	0.6521	-0.6169	yes	-	-	-	-	-	-	-	HMDB0258271	Lipids and lipid-like molecules	Prenol lipids	Terpene glycosides	-	451.147	3.3692	M+FA-H	C17H26O11	0	49.3	metab_15303	neg
pos_1836	Blebbistatin	0.001262	0.002634	1.66	1.6611	1.353	0.4362	yes	-	-	-	-	-	-	-	HMDB0243556	Organoheterocyclic compounds	Quinolines and derivatives	Pyrroloquinolines	-	585.25	1.89077	2M+H	C18H16N2O2	0	31.3	metab_903	pos
neg_3490	Etimicin	8.66e-09	6.09e-08	1.6598	1.658	0.65	-0.6215	yes	-	-	-	-	-	-	-	HMDB0252101	Organic oxygen compounds	Organooxygen compounds	Carbohydrates and carbohydrate conjugates	-	498.293	3.93317	M+Na-2H	C21H43N5O7	0	45	metab_10587	neg
neg_9253	Deoxyguanylic Acid	2.55e-06	7.26e-06	1.6591	1.6615	0.6591	-0.6015	yes	C00362	Nucleic acids	Nucleotides	map01100;map01232;map00230	Metabolic pathways;Nucleotide metabolism;Purine metabolism	Metabolism;Metabolism;Metabolism	Global and overview maps;Global and overview maps;Nucleotide metabolism	HMDB0001044	Nucleosides, nucleotides, and analogues	Purine nucleotides	Purine deoxyribonucleotides	902-04-5	346.056	1.69913	M-H	C10H14N5O7P	48.2	0	metab_16833	neg
pos_7096	N2-Acetylornithine	1.22e-08	1.36e-07	1.6587	1.6579	0.815	-0.2951	yes	C00437	-	-	map01100;map01210;map00220;map01110;map01230	Metabolic pathways;2-Oxocarboxylic acid metabolism;Arginine biosynthesis;Biosynthesis of secondary metabolites;Biosynthesis of amino acids	Metabolism;Metabolism;Metabolism;Metabolism;Metabolism	Global and overview maps;Global and overview maps;Amino acid metabolism;Global and overview maps;Global and overview maps	HMDB0003357	Organic acids and derivatives	Carboxylic acids and derivatives	Amino acids, peptides, and analogues	6205-08-09	175.108	1.47988	M+H	C7H14N2O3	0	49.7	metab_6531	pos
pos_6582	Trypanothione disulfide	3.94e-07	2.29e-06	1.6568	1.6571	1.2445	0.3155	yes	C03170	-	-	map01100;map00480	Metabolic pathways;Glutathione metabolism	Metabolism;Metabolism	Global and overview maps;Metabolism of other amino acids	HMDB0060521	Organic acids and derivatives	Carboxylic acids and derivatives	Amino acids, peptides, and analogues	96304-42-6	739.325	2.01488	M+NH4	C27H47N9O10S2	0	82.8	metab_5987	pos
pos_2145	Ile Tyr	2.67e-09	4.11e-08	1.6567	1.6568	0.7995	-0.3228	yes	-	-	-	-	-	-	-	-	-	-	-	-	295.165	2.34205	M+H	C15H22N2O4	60.8	0	metab_1231	pos
pos_6212	(S)-5-Amino-3-oxohexanoate	2.19e-07	1.42e-06	1.656	1.6545	0.7773	-0.3635	yes	C03656	-	-	map01100;map00310	Metabolic pathways;Lysine degradation	Metabolism;Metabolism	Global and overview maps;Amino acid metabolism	HMDB0012131	Organic acids and derivatives	Keto acids and derivatives	Medium-chain keto acids and derivatives	19355-90-9	332.181	2.45918	2M+ACN+H	C6H11NO3	0	59.4	metab_5592	pos
neg_2926	BERBAMINE	1.16e-06	3.68e-06	1.6538	1.6554	0.6735	-0.5703	yes	C09357	-	-	-	-	-	-	HMDB0242681	Lignans, neolignans and related compounds	Not Available	Not Available	478-61-5	653.29	3.23213	M+FA-H	C37H40N2O6	0	57.9	metab_9968	neg
pos_2109	PG(PGE2/18:3(9Z,12Z,15Z))	2.53e-06	1.1e-05	1.6529	1.6518	0.8079	-0.3078	yes	-	-	-	-	-	-	-	HMDB0269412	Not Available	Not Available	Not Available	-	432.24	2.28742	M+H+Na	C44H73O13P	0	57.3	metab_1192	pos
neg_3648	Avenanthramide 1f	1.24e-08	8.16e-08	1.6483	1.6472	0.6945	-0.526	yes	-	-	-	-	-	-	-	HMDB0029283	Phenylpropanoids and polyketides	Cinnamic acids and derivatives	Hydroxycinnamic acids and derivatives	-	294.077	4.14905	M-H2O-H	C17H15NO5	0	34.6	metab_10758	neg
pos_5705	Prenalterol	4.51e-11	1.56e-09	1.6458	1.6456	0.784	-0.351	yes	C07533	-	-	-	-	-	-	HMDB0256762;HMDB0243809	Benzenoids	Phenols	4-alkoxyphenols	57526-81-5	514.286	3.36337	2M+ACN+Na	C12H19NO3	0	45.7	metab_5052	pos
neg_9422	N-Formyl-L-glutamic acid	0.009659	0.01264	1.6449	1.6495	0.5553	-0.8487	yes	C01045	-	-	map01100;map00340	Metabolic pathways;Histidine metabolism	Metabolism;Metabolism	Global and overview maps;Amino acid metabolism	PW_C001903;HMDB0003470	Organic acids and derivatives	Carboxylic acids and derivatives	Amino acids, peptides, and analogues	1681-96-5	211.996	1.17605	M+K-2H	C6H9NO5	0	36.4	metab_17008	neg
neg_6803	Sinensetin	2.52e-15	3.91e-13	1.6443	1.6438	0.6424	-0.6385	yes	C10186	-	-	-	-	-	-	HMDB0036633;LMPK12111250;MJDBOTE0001259	Phenylpropanoids and polyketides	Flavonoids	O-methylated flavonoids	2306-27-6	353.101	4.5334	M-H2O-H	C20H20O7	0	33.7	metab_14170	neg
pos_7120	Levetiracetam	2.15e-08	2.16e-07	1.6431	1.6434	1.2336	0.3028	yes	C07841	-	-	-	-	-	-	HMDB0015333;HMDB0252105	Organic acids and derivatives	Carboxylic acids and derivatives	Amino acids, peptides, and analogues	102767-28-2	212.139	1.33308	M+ACN+H	C8H14N2O2	0	70.1	metab_6557	pos
neg_8942	Quinagolida	9.56e-12	2.72e-10	1.643	1.6421	0.7309	-0.4522	yes	-	-	-	-	-	-	-	HMDB0257030	Organoheterocyclic compounds	Quinolines and derivatives	Benzoquinolines	-	430.194	2.14767	M+Cl	C20H33N3O3S	0	60.8	metab_16502	neg
pos_1958	Valyllysine	9.34e-13	7.36e-11	1.6419	1.6417	1.3174	0.3977	yes	-	-	-	-	-	-	-	HMDB0029132	Organic acids and derivatives	Carboxylic acids and derivatives	Amino acids, peptides, and analogues	22677-62-9	210.16	2.03807	M+H-2H2O	C11H23N3O3	0	37	metab_1029	pos
neg_7665	Tryptophyl-Glutamine	1.18e-09	1.19e-08	1.6408	1.64	1.4888	0.5741	yes	-	-	-	-	-	-	-	HMDB0029081	Organic acids and derivatives	Carboxylic acids and derivatives	Amino acids, peptides, and analogues	-	377.146	3.56182	M+FA-H	C16H20N4O4	0	64.8	metab_15105	neg
neg_6429	NeuAc(alpha->6)GalNAc(alpha1->O)Ser	7.1e-05	0.000136	1.6404	1.638	0.6711	-0.5755	yes	-	-	-	-	-	-	-	HMDB0255554	Organic oxygen compounds	Organooxygen compounds	Carbohydrates and carbohydrate conjugates	-	580.205	5.23035	M-H2O-H	C22H37N3O16	0	90.1	metab_13757	neg
neg_4214	3-Hydroxymugineic acid	1.94e-14	2.1e-12	1.6364	1.636	0.6264	-0.6749	yes	-	-	-	-	-	-	-	HMDB0033927	Organic acids and derivatives	Carboxylic acids and derivatives	Amino acids, peptides, and analogues	74235-23-7	335.107	5.20792	M-H	C12H20N2O9	0	31.1	metab_11374	neg
neg_6640	(2R)-2-[[(2R)-2-amino-3-(1-methoxycarbonylindol-3-yl)propanoyl]-[(2S)-2-[[(2R,6S)-2,6-dimethylpiperidine-1-carbonyl]amino]-4,4-dimethylpentanoyl]amino]hexanoic acid	7.95e-09	5.68e-08	1.636	1.6352	0.7121	-0.4899	yes	-	-	-	-	-	-	-	HMDB0260055	Organic acids and derivatives	Carboxylic acids and derivatives	Amino acids, peptides, and analogues	-	662.352	4.79768	M+Na-2H	C34H51N5O7	0	44.4	metab_13991	neg
pos_2129	S-(3-Methylbutanoyl)-dihydrolipoamide-E	1.28e-11	5.79e-10	1.6358	1.6356	0.8146	-0.2958	yes	C05119	-	-	-	-	-	-	HMDB0006867;PW_C002978	Lipids and lipid-like molecules	Fatty Acyls	Fatty acyl thioesters	-	600.298	2.31075	2M+NH4	C13H25NO2S2	0	30.5	metab_7515	pos
neg_3682	Dodec-9-enedioylcarnitine	1.32e-12	5.7e-11	1.6351	1.6347	0.6526	-0.6157	yes	-	-	-	-	-	-	-	HMDB0241226	Lipids and lipid-like molecules	Fatty Acyls	Fatty acid esters	-	408.177	4.19705	M+K-2H	C19H33NO6	0	35.3	metab_10796	neg
pos_4798	LysoPC(P-18:1(9Z)/0:0)	4.13e-10	9.07e-09	1.6319	1.6319	1.2512	0.3233	yes	C04230	Lipids	Phospholipids	map00564;map05231	Glycerophospholipid metabolism;Choline metabolism in cancer	Metabolism;Human Diseases	Lipid metabolism;Cancer: overview	HMDB0010408	Lipids and lipid-like molecules	Glycerophospholipids	Glycerophosphocholines	-	547.385	5.5979	M+ACN+H	C26H52NO6P	0	31.3	metab_4104	pos
neg_2246	Glutaminylglycine	6.1e-11	1.14e-09	1.6318	1.6314	0.7314	-0.4513	yes	-	-	-	-	-	-	-	HMDB0028797	Organic acids and derivatives	Carboxylic acids and derivatives	Amino acids, peptides, and analogues	2650-65-9	608.269	2.316	3M-H	C7H13N3O4	0	32.2	metab_9223	neg
pos_1780	Serylvalylglycylglutamic acid	1.76e-12	1.17e-10	1.6313	1.6309	0.8247	-0.278	yes	-	-	-	-	-	-	-	HMDB0302163	Organic acids and derivatives	Carboxylic acids and derivatives	Amino acids, peptides, and analogues	-	432.208	1.78947	M+ACN+H	C15H26N4O8	0	40	metab_841	pos
pos_6772	Chinenoside V	2.48e-09	3.92e-08	1.6311	1.6306	0.8315	-0.2661	yes	-	-	-	-	-	-	-	HMDB0031139	Lipids and lipid-like molecules	Steroids and steroid derivatives	Steroidal glycosides	170739-22-7	470.235	1.89077	M+H+Na	C45H72O19	0	69.2	metab_6182	pos
pos_2066	Flurithromycin	1.82e-08	1.87e-07	1.6304	1.6295	0.8072	-0.309	yes	-	-	-	-	-	-	-	HMDB0252409	Organic oxygen compounds	Organooxygen compounds	Carbohydrates and carbohydrate conjugates	-	398.718	2.21723	M+2Na	C37H66FNO13	0	92.7	metab_1145	pos
neg_2023	8H-Purin-8-one, 7-(2-butynyl)-7,9-dihydro-9-(6-methoxy-3-pyridinyl)-6-(1-piperazinyl)-	1.48e-11	3.87e-10	1.6257	1.6253	0.652	-0.6171	yes	-	-	-	-	-	-	-	HMDB0259448	Organoheterocyclic compounds	Diazinanes	Piperazines	-	400.147	1.85948	M+Na-2H	C19H21N7O2	0	33.9	metab_8982	neg
pos_6280	7-Acetyllycopsamine	1.45e-05	4.97e-05	1.6229	1.6221	0.7919	-0.3367	yes	C16751	-	-	-	-	-	-	HMDB0302356	Alkaloids and derivatives	Not Available	Not Available	-	405.197	2.38105	M+ACN+Na	C17H27NO6	0	41.1	metab_5666	pos
neg_6342	Methyl 3-benzoyloxy-8-(3-hydroxypropyl)-8-azabicyclo[3.2.1]octane-2-carboxylate	2.88e-08	1.64e-07	1.6191	1.6195	0.6691	-0.5796	yes	-	-	-	-	-	-	-	HMDB0257742	Benzenoids	Benzene and substituted derivatives	Benzoic acids and derivatives	-	693.346	5.37268	2M-H	C19H25NO5	0	46.3	metab_13661	neg
pos_2418	Ala Asp Phe	1.47e-08	1.59e-07	1.6142	1.6136	0.769	-0.379	yes	-	-	-	-	-	-	-	-	-	-	-	-	352.149	2.86475	M+H	C16H21N3O6	48.3	0	metab_1528	pos
pos_3881	7,10,13,16,19-Docosapentaenoic acid	1.54e-05	5.23e-05	1.6126	1.6128	1.2596	0.333	yes	C16513	-	-	map01040	Biosynthesis of unsaturated fatty acids	Metabolism	Lipid metabolism	HMDB0247288;HMDB0006528;HMDB0246621;LMFA01030184	Lipids and lipid-like molecules	Fatty Acyls	Fatty acids and conjugates	24880-45-3	353.247	7.78225	M+Na	C22H34O2	0	62.9	metab_3099	pos
neg_6949	(E)-2-Hydroxy-N-desmethyldoxepin	4.66e-08	2.45e-07	1.6118	1.6124	0.6739	-0.5695	yes	-	-	-	-	-	-	-	PW_C040605;HMDB0060699	Organoheterocyclic compounds	Benzoxepines	Dibenzoxepines	-	302.118	4.34105	M+Na-2H	C18H19NO2	0	39.2	metab_14326	neg
neg_8519	Flavan-3-ol	3.25e-13	1.79e-11	1.6105	1.6096	0.7431	-0.4283	yes	C15598	-	-	-	-	-	-	HMDB0252291	Phenylpropanoids and polyketides	Flavonoids	Flavans	-	497.2	2.6694	2M+FA-H	C15H14O2	0	52.3	metab_16039	neg
neg_6816	Suloctidil	8.26e-14	6.35e-12	1.6089	1.6083	0.6597	-0.6002	yes	-	-	-	-	-	-	-	HMDB0242578	Benzenoids	Benzene and substituted derivatives	Phenylpropanes	-	372.214	4.5174	M+Cl	C20H35NOS	0	37.3	metab_14183	neg
pos_50	Plastoquinone 3	2e-06	8.99e-06	1.6061	1.6064	1.2496	0.3215	yes	-	-	-	-	-	-	-	HMDB0033786	Lipids and lipid-like molecules	Prenol lipids	Diterpenoids	1168-52-1	323.236	5.67623	M+H-H2O, M+ACN+H, M+H, M+H-2H2O	C23H32O2	0	32.4	metab_4324	pos
neg_8343	PGP(22:5(7Z,10Z,13Z,16Z,19Z)/5-iso PGF2VI)	2.68e-07	1.05e-06	1.6054	1.6043	1.4358	0.5219	yes	-	-	-	-	-	-	-	HMDB0274102	Not Available	Not Available	Not Available	-	981.428	2.8869	M+Cl	C46H76O16P2	0	75.4	metab_15845	neg
neg_3839	Omadacycline	2.36e-07	9.44e-07	1.6052	1.6055	0.6661	-0.5861	yes	-	-	-	-	-	-	-	HMDB0255962	Phenylpropanoids and polyketides	Tetracyclines	Not Available	-	555.278	4.42107	M-H	C29H40N4O7	0	64.9	metab_10961	neg
neg_3736	Valyl-prolyl-glycyl-valyl-glycine	2.17e-11	5.19e-10	1.6041	1.6032	0.7365	-0.4412	yes	-	-	-	-	-	-	-	HMDB0259877	Organic acids and derivatives	Carboxylic acids and derivatives	Amino acids, peptides, and analogues	-	472.241	4.27705	M+FA-H	C19H33N5O6	0	76.1	metab_10853	neg
pos_6156	Aminodeoxykanamycin	1.59e-09	2.72e-08	1.6036	1.603	0.827	-0.274	yes	C01822	-	-	map01110;map00524	Biosynthesis of secondary metabolites;Neomycin, kanamycin and gentamicin biosynthesis	Metabolism;Metabolism	Global and overview maps;Biosynthesis of other secondary metabolites	HMDB0242522;HMDB0015303	Organic oxygen compounds	Organooxygen compounds	Carbohydrates and carbohydrate conjugates	8063-07-08	522.219	2.54465	M+K	C18H37N5O10	0	81.9	metab_5531	pos
neg_4550	(3b,20R,22R)-3,20,27-Trihydroxy-1-oxowitha-5,24-dienolide 3-glucoside	4.12e-09	3.33e-08	1.6032	1.6025	0.6731	-0.5711	yes	-	-	-	-	-	-	-	HMDB0033573	Lipids and lipid-like molecules	Prenol lipids	Terpene glycosides	227179-09-1	615.318	5.62038	M-H2O-H	C34H50O11	0	51.7	metab_11743	neg
pos_4844	2,2-Bis(1-hydroxy-2,2,6,6-tetramethylpiperidin-4-yl)decanedioic acid	0.01942	0.03115	1.6012	1.603	1.3787	0.4633	yes	-	-	-	-	-	-	-	HMDB0257869	Lipids and lipid-like molecules	Fatty Acyls	Fatty acids and conjugates	-	477.368	5.49573	M+H-2H2O	C28H52N2O6	0	56.9	metab_4153	pos
pos_5575	Threonylproline	2.83e-09	4.32e-08	1.6002	1.5999	0.7929	-0.3349	yes	-	-	-	-	-	-	-	HMDB0029069	Organic acids and derivatives	Carboxylic acids and derivatives	Amino acids, peptides, and analogues	46398-79-2	474.255	3.75928	2M+ACN+H	C9H16N2O4	0	58	metab_4922	pos
neg_4190	Lycorine	4.24e-10	5.17e-09	1.5994	1.5984	0.7517	-0.4118	yes	C08532	-	-	map00950;map01063	Isoquinoline alkaloid biosynthesis;Biosynthesis of alkaloids derived from shikimate pathway	Metabolism;Metabolism	Biosynthesis of other secondary metabolites;Chemical structure transformation maps	HMDB0254256;MJDBOTE0000964	Alkaloids and derivatives	Amaryllidaceae alkaloids	Lycorine-type amaryllidaceae alkaloids	476-28-8	308.092	5.1481	M+Na-2H	C16H17NO4	0	40.5	metab_11347	neg
neg_8935	2-Oxomelatonin	6.44e-08	3.21e-07	1.5991	1.5977	0.6813	-0.5536	yes	-	-	-	-	-	-	-	HMDB0060721	Organoheterocyclic compounds	Indoles and derivatives	Indolines	-	293.114	2.16367	M+FA-H	C13H16N2O3	0	38.2	metab_16495	neg
neg_9980	L-Histidine	5.24e-07	1.86e-06	1.5969	1.5967	0.7033	-0.5079	yes	C00135	Peptides	Amino acids	map01100;map01110;map02010;map00340;map00470;map01230;map04974;map00970;map01065;map05230;map00410;map00404;map01060	Metabolic pathways;Biosynthesis of secondary metabolites;ABC transporters;Histidine metabolism;D-Amino acid metabolism;Biosynthesis of amino acids;Protein digestion and absorption;Aminoacyl-tRNA biosynthesis;Biosynthesis of alkaloids derived from histidine and purine;Central carbon metabolism in cancer;beta-Alanine metabolism;Staurosporine biosynthesis;Biosynthesis of plant secondary metabolites	Metabolism;Metabolism;Environmental Information Processing;Metabolism;Metabolism;Metabolism;Organismal Systems;Genetic Information Processing;Metabolism;Human Diseases;Metabolism;Metabolism;Metabolism	Global and overview maps;Global and overview maps;Membrane transport;Amino acid metabolism;Metabolism of other amino acids;Global and overview maps;Digestive system;Translation;Chemical structure transformation maps;Cancer: overview;Metabolism of other amino acids;Biosynthesis of other secondary metabolites;Chemical structure transformation maps	HMDB0000177;PW_C000116;MJDBOTE0000427	Organic acids and derivatives	Carboxylic acids and derivatives	Amino acids, peptides, and analogues	71-00-1	154.061	0.552333	M-H	C6H9N3O2	71.8	0	metab_17575	neg
pos_823	7a,12a-Dihydroxy-3-oxo-4-cholenoic acid	4.39e-07	2.51e-06	1.5963	1.5965	1.2063	0.2705	yes	C15568	-	-	-	-	-	-	HMDB0000447	Lipids and lipid-like molecules	Steroids and steroid derivatives	Bile acids, alcohols and derivatives	13587-11-6	405.263	5.67623	M+H, M+Na	C24H36O5	0	43.6	metab_7292	pos
pos_1105	Epsilon-(Carboxymethyl)lysine	1.09e-09	1.99e-08	1.5953	1.5943	0.8304	-0.2681	yes	-	-	-	-	-	-	-	HMDB0251887;HMDB0240347	Organic acids and derivatives	Carboxylic acids and derivatives	Amino acids, peptides, and analogues	5746-04-03	187.108	0.623083	M+H-H2O, M+ACN+H	C8H16N2O4	0	57.1	metab_116	pos
pos_2311	Gly Pro Ile	1.04e-09	1.92e-08	1.5945	1.594	0.8316	-0.2661	yes	-	-	-	-	-	-	-	-	-	-	-	-	286.176	2.63835	M+H	C13H23N3O4	37.2	0	metab_1410	pos
pos_6520	Pro Glu Val	8.22e-07	4.21e-06	1.5943	1.5959	0.7934	-0.334	yes	-	-	-	-	-	-	-	-	-	-	-	-	344.181	2.07717	M+H	C15H25N3O6	59.2	0	metab_5925	pos
neg_2791	Nemifitide	3.87e-09	3.14e-08	1.5919	1.5911	0.7257	-0.4626	yes	-	-	-	-	-	-	-	HMDB0255508	Organic acids and derivatives	Carboxylic acids and derivatives	Amino acids, peptides, and analogues	-	729.304	3.07962	M+Cl	C33H43FN10O6	0	73.4	metab_9819	neg
neg_3810	Kinetensin 4-7	3.59e-15	5.39e-13	1.5902	1.5898	0.695	-0.525	yes	-	-	-	-	-	-	-	HMDB0012986	Organic acids and derivatives	Carboxylic acids and derivatives	Amino acids, peptides, and analogues	138482-56-1	592.262	4.37305	M+Na-2H	C26H37N9O6	0	47.4	metab_10935	neg
neg_8413	(1E)-1-Phenyltriaz-1-ene	2.2e-08	1.32e-07	1.5902	1.59	1.4689	0.5547	yes	-	-	-	-	-	-	-	HMDB0242314	Benzenoids	Benzene and substituted derivatives	Not Available	-	287.125	2.81438	2M+FA-H	C6H7N3	0	44	metab_15923	neg
pos_6279	Leu-Leu-Tyr	1.28e-10	3.51e-09	1.5898	1.5895	0.8287	-0.2711	yes	C11331	-	-	-	-	-	-	HMDB0304804	Organic acids and derivatives	Carboxylic acids and derivatives	Amino acids, peptides, and analogues	20368-24-5	430.229	2.38105	M+Na	C21H33N3O5	0	39.9	metab_5664	pos
pos_1223	Piperidines	8.86e-07	4.48e-06	1.5878	1.5854	0.8072	-0.3089	yes	-	-	-	-	-	-	-	HMDB0302905	Organoheterocyclic compounds	Piperidines	Not Available	-	329.192	1.75842	M+NH4, 2M+H	C6H14NO4+	0	32.9	metab_245	pos
neg_3434	Paracetamol mercapturate	1.26e-06	3.96e-06	1.5875	1.5885	0.6555	-0.6094	yes	-	-	-	-	-	-	-	HMDB0256121;HMDB0242140	Organic acids and derivatives	Carboxylic acids and derivatives	Amino acids, peptides, and analogues	-	295.076	3.87317	M-H	C13H16N2O4S	0	32.9	metab_10526	neg
neg_7559	7-Hydroxymitragynine	1.57e-06	4.78e-06	1.5866	1.5829	0.7174	-0.4792	yes	-	-	-	-	-	-	-	HMDB0247263	Lipids and lipid-like molecules	Prenol lipids	Diterpenoids	-	887.449	3.65033	2M+Hac-H	C23H30N2O5	0	76.3	metab_14990	neg
neg_9566	Gamma-Glutamylglutamine	1.05e-09	1.08e-08	1.5856	1.5841	0.6843	-0.5473	yes	C05283	-	-	-	-	-	-	HMDB0029147;HMDB0011738	Organic acids and derivatives	Carboxylic acids and derivatives	Amino acids, peptides, and analogues	1466-50-8;10148-81-9	274.104	0.84845	M-H	C10H17N3O6	52.9	0	metab_17147	neg
neg_2941	Coutaric acid	1.02e-07	4.69e-07	1.582	1.5819	1.4545	0.5405	yes	C01327	-	-	map04742;map04974	Taste transduction;Protein digestion and absorption	Organismal Systems;Organismal Systems	Sensory system;Digestive system	HMDB0029225	Benzenoids	Benzene and substituted derivatives	Benzoic acids and derivatives	-	394.198	3.24812	M+FA-H	C18H27N3O4	0	56.8	metab_9985	neg
neg_2381	Z-Vdvad-fmk	1.02e-10	1.76e-09	1.5789	1.5788	0.7461	-0.4226	yes	-	-	-	-	-	-	-	HMDB0259976	Organic acids and derivatives	Peptidomimetics	Hybrid peptides	-	694.317	2.53303	M-H	C32H46FN5O11	0	41.3	metab_9371	neg
pos_3331	2-Phenylethanethiol	6.53e-08	5.38e-07	1.5778	1.5778	0.8133	-0.2981	yes	-	-	-	-	-	-	-	HMDB0032637	Benzenoids	Benzene and substituted derivatives	Not Available	4410-99-5	180.084	5.65275	M+ACN+H	C8H10S	0	51.6	metab_2496	pos
pos_6191	Kainic acid	1.98e-07	1.31e-06	1.5777	1.577	0.7769	-0.3643	yes	C12819	-	-	-	-	-	-	HMDB0253757	Organic acids and derivatives	Carboxylic acids and derivatives	Amino acids, peptides, and analogues	487-79-6	277.118	2.48227	M+ACN+Na	C10H15NO4	0	53.9	metab_5568	pos
neg_8853	Batatasin IV	4.75e-08	2.48e-07	1.5771	1.5752	0.7287	-0.4565	yes	C10247	-	-	-	-	-	-	HMDB0032641;LMPK13090032	Phenylpropanoids and polyketides	Stilbenes	Not Available	60347-67-3	487.216	2.26802	2M-H	C15H16O3	0	63.9	metab_16405	neg
neg_8742	Glu-Ile-Leu-Asp-Val	1.46e-05	3.32e-05	1.5755	1.5705	0.7122	-0.4896	yes	-	-	-	-	-	-	-	HMDB0252757	Organic acids and derivatives	Peptidomimetics	Hybrid peptides	-	624.263	2.38802	M+K-2H	C26H45N5O10	0	87.6	metab_16282	neg
pos_7441	Canavalioside	0.0002687	0.0006554	1.5741	1.5698	0.7861	-0.3471	yes	-	-	-	-	-	-	-	HMDB0036317	Lipids and lipid-like molecules	Prenol lipids	Terpene glycosides	316141-31-8	274.139	0.623083	M+2H	C26H42O12	0	43.9	metab_6888	pos
pos_5759	Val Asp Leu	7.11e-08	5.75e-07	1.5723	1.5713	0.7953	-0.3304	yes	-	-	-	-	-	-	-	-	-	-	-	-	346.197	3.19252	M+H	C15H27N3O6	79.5	0	metab_5105	pos
neg_6960	6-Hydroxyhexanoic Acid	2.36e-11	5.49e-10	1.572	1.5719	0.786	-0.3473	yes	C06103	-	-	map01220;map00930;map01120	Degradation of aromatic compounds;Caprolactam degradation;Microbial metabolism in diverse environments	Metabolism;Metabolism;Metabolism	Global and overview maps;Xenobiotics biodegradation and metabolism;Global and overview maps	HMDB0012843	Organic acids and derivatives	Hydroxy acids and derivatives	Medium-chain hydroxy acids and derivatives	1191-25-9	131.07	4.33305	M-H	C6H12O3	86	0	metab_14338	neg
neg_3358	Valyltryptophan	6.24e-08	3.13e-07	1.5713	1.5687	0.6543	-0.612	yes	-	-	-	-	-	-	-	HMDB0029138	Organic acids and derivatives	Carboxylic acids and derivatives	Amino acids, peptides, and analogues	24587-37-9	302.151	3.76098	M-H	C16H21N3O3	0	34.6	metab_10441	neg
neg_3008	Erythromycin A enol ether	1.77e-06	5.32e-06	1.5702	1.5693	0.6879	-0.5396	yes	-	-	-	-	-	-	-	HMDB0251934	Organic oxygen compounds	Organooxygen compounds	Carbohydrates and carbohydrate conjugates	-	752.394	3.32863	M+K-2H	C37H65NO12	0	71.4	metab_10060	neg
neg_1028	4-Methylbenzoic Acid	5.98e-12	1.84e-10	1.5691	1.5695	1.4017	0.4872	yes	C01454	-	-	map01100;map01220;map00622;map01120	Metabolic pathways;Degradation of aromatic compounds;Xylene degradation;Microbial metabolism in diverse environments	Metabolism;Metabolism;Metabolism;Metabolism	Global and overview maps;Global and overview maps;Xenobiotics biodegradation and metabolism;Global and overview maps	HMDB0029635	Benzenoids	Benzene and substituted derivatives	Benzoic acids and derivatives	99-94-5	135.044	5.23832	M-H, M+FA-H	C8H8O2	78.8	0	metab_7828	neg
pos_2074	Leukotriene E4	2.73e-09	4.18e-08	1.5672	1.567	0.821	-0.2846	yes	C05952	Lipids	Eicosanoids	map00590;map01100;map04080;map04664	Arachidonic acid metabolism;Metabolic pathways;Neuroactive ligand-receptor interaction;Fc epsilon RI signaling pathway	Metabolism;Metabolism;Environmental Information Processing;Organismal Systems	Lipid metabolism;Global and overview maps;Signaling molecules and interaction;Immune system	PW_C001485;HMDB0002200;HMDB0247369;LMFA03020075;LMFA03020002	Lipids and lipid-like molecules	Fatty Acyls	Eicosanoids	75715-89-8	404.228	2.23277	M+H-2H2O	C23H37NO5S	0	32.8	metab_1154	pos
neg_4003	Phe Lys Thr Glu	2.8e-10	3.78e-09	1.5648	1.5642	0.6937	-0.5276	yes	-	-	-	-	-	-	-	-	-	-	-	-	522.257	4.73017	M-H	C24H37N5O8	63.8	0	metab_11142	neg
pos_64	Gly Pro Gln	1.61e-06	7.48e-06	1.5644	1.5644	0.8165	-0.2924	yes	-	-	-	-	-	-	-	-	-	-	-	-	301.15	0.623083	M+H, M+K, M+CH3OH+H, M+Na	C12H20N4O5	58.1	0	metab_5796	pos
neg_2630	PGP(LTE4/a-13:0)	7.85e-08	3.77e-07	1.5632	1.5641	1.396	0.4813	yes	-	-	-	-	-	-	-	HMDB0274301	Not Available	Not Available	Not Available	-	924.407	2.8869	M-H2O-H	C42H75NO16P2S	0	80.4	metab_9642	neg
neg_1427	N-cis-Caffeoyltyramine	2.49e-07	9.85e-07	1.5627	1.5602	0.7235	-0.467	yes	-	-	-	-	-	-	-	HMDB0033026	Phenylpropanoids and polyketides	Cinnamic acids and derivatives	Hydroxycinnamic acids and derivatives	219773-48-5	643.233	2.25203	M+FA-H, 2M+FA-H	C17H17NO4	0	40.1	metab_8351	neg
neg_2154	4-Hydroxyphenylacetic acid sulfate	2.06e-07	8.45e-07	1.5619	1.56	1.4095	0.4952	yes	-	-	-	-	-	-	-	HMDB0304906	Benzenoids	Phenols	1-hydroxy-2-unsubstituted benzenoids	-	266.975	2.16367	M+Cl	C8H8O6S	0	32.3	metab_9122	neg
neg_6996	Thr Glu Leu Lys	5.47e-09	4.17e-08	1.5617	1.5608	0.7096	-0.4948	yes	-	-	-	-	-	-	-	-	-	-	-	-	488.273	4.28507	M-H	C21H39N5O8	31.1	0	metab_14375	neg
pos_2177	Ginsenoside I	1.3e-10	3.54e-09	1.5605	1.5597	0.832	-0.2654	yes	C10822	-	-	map01066	Biosynthesis of alkaloids derived from terpenoid and polyketide	Metabolism	Chemical structure transformation maps	HMDB0035285	Lipids and lipid-like molecules	Steroids and steroid derivatives	Steroidal alkaloids	227758-58-9	501.266	2.39672	M+H+Na	C48H82O20	0	33.8	metab_1266	pos
neg_6656	CPA(18:0/0:0)	4.12e-08	2.21e-07	1.5596	1.5576	0.7271	-0.4598	yes	-	-	-	-	-	-	-	HMDB0007004	Lipids and lipid-like molecules	Glycerophospholipids	Glycerophosphates	-	441.235	4.76798	M+Na-2H	C21H41O6P	0	42.1	metab_14008	neg
neg_2753	Veratrine	1.29e-07	5.72e-07	1.559	1.5558	0.7191	-0.4758	yes	-	-	-	-	-	-	-	HMDB0259783	Lipids and lipid-like molecules	Steroids and steroid derivatives	Steroidal alkaloids	-	628.295	3.04768	M+K-2H	C32H49NO9	0	64.8	metab_9778	neg
neg_4840	PE(18:0/0:0)	0.00251	0.003587	1.5577	1.5593	0.7074	-0.4994	yes	-	-	-	-	-	-	-	LMGP02050001	-	-	-	-	480.309	6.02305	M-H	C23H48NO7P	55.7	0	metab_12049	neg
pos_5669	Bucillamine	1.43e-05	4.88e-05	1.5567	1.557	0.7982	-0.3253	yes	-	-	-	-	-	-	-	HMDB0249419	Organic acids and derivatives	Carboxylic acids and derivatives	Amino acids, peptides, and analogues	-	206.03	3.47252	M+H-H2O	C7H13NO3S2	0	35.8	metab_5018	pos
neg_7201	Cyclic 3-Hydroxymelatonin	1.25e-06	3.93e-06	1.5562	1.5538	0.6736	-0.5701	yes	-	-	-	-	-	-	-	HMDB0060069	Organoheterocyclic compounds	Indoles and derivatives	Pyrroloindoles	-	293.114	4.05303	M+FA-H	C13H16N2O3	0	44.9	metab_14598	neg
neg_1083	N-[(2S)-1-[[(2S)-1-Amino-1-oxopropan-2-yl]amino]-3-naphthalen-2-yl-1-oxopropan-2-yl]-N'-hydroxy-2-(2-methylpropyl)butanediamide	5.52e-08	2.81e-07	1.5557	1.5533	0.716	-0.4819	yes	-	-	-	-	-	-	-	HMDB0258718	Organic acids and derivatives	Carboxylic acids and derivatives	Amino acids, peptides, and analogues	-	971.486	5.524	M-H, 2M+Hac-H	C24H32N4O5	0	66.9	metab_7972	neg
neg_8478	LysoPE(0:0/14:1(9Z))	4.6e-11	9.19e-10	1.5556	1.5542	0.7526	-0.4101	yes	-	-	-	-	-	-	-	HMDB0011471	Lipids and lipid-like molecules	Glycerophospholipids	Glycerophosphoethanolamines	-	444.21	2.7259	M+Na-2H	C19H38NO7P	0	58	metab_15993	neg
neg_3907	Semagacestat	1.96e-11	4.8e-10	1.5552	1.5549	0.6716	-0.5744	yes	-	-	-	-	-	-	-	HMDB0258218	Organic acids and derivatives	Carboxylic acids and derivatives	Amino acids, peptides, and analogues	-	406.198	4.5494	M+FA-H	C19H27N3O4	0	55.2	metab_11037	neg
neg_4060	11-beta-Hydroxyandrosterone-3-glucuronide	3.89e-12	1.35e-10	1.5549	1.5546	0.6947	-0.5256	yes	C05643	-	-	map00380	Tryptophan metabolism	Metabolism	Amino acid metabolism	HMDB0010351;LMST05010030;LMST05010055	Organoheterocyclic compounds	Indoles and derivatives	Hydroxyindoles	-	527.251	4.84402	M+FA-H	C25H38O9	0	77.1	metab_17596	neg
pos_6788	Hydroxyprolyl-Tyrosine	3.16e-06	1.33e-05	1.5539	1.5526	0.819	-0.2881	yes	-	-	-	-	-	-	-	HMDB0028875	Organic acids and derivatives	Carboxylic acids and derivatives	Amino acids, peptides, and analogues	-	630.271	1.8675	2M+ACN+H	C14H18N2O5	0	43	metab_6199	pos
neg_6936	Tyr-D-thr-gly-phe-leu-thr	6.47e-08	3.22e-07	1.5538	1.5534	0.7266	-0.4608	yes	-	-	-	-	-	-	-	HMDB0251632	Organic acids and derivatives	Carboxylic acids and derivatives	Amino acids, peptides, and analogues	-	721.316	4.35705	M+Na-2H	C34H48N6O10	0	86.4	metab_14314	neg
neg_4705	PS(20:5(5Z,8Z,11Z,14Z,16E)-OH(18R)/20:5(5Z,8Z,11Z,14Z,17Z))	2.89e-11	6.4e-10	1.5478	1.5469	1.3654	0.4494	yes	-	-	-	-	-	-	-	HMDB0282834	Not Available	Not Available	Not Available	-	864.447	5.74812	M+Na-2H	C46H70NO11P	0	39.7	metab_11906	neg
neg_5028	Glycerophospho-N-Palmitoyl Ethanolamine	3.05e-06	8.49e-06	1.5472	1.546	0.7425	-0.4296	yes	-	-	-	-	-	-	-	-	-	-	-	-	452.278	7.0783	M-H	C21H44NO7P	42.5	0	metab_12243	neg
neg_9299	N2-Succinyl-L-ornithine	2.59e-10	3.54e-09	1.5433	1.5432	0.7218	-0.4703	yes	C03415	-	-	map01100;map00330	Metabolic pathways;Arginine and proline metabolism	Metabolism;Metabolism	Global and overview maps;Amino acid metabolism	HMDB0001199	Organic acids and derivatives	Carboxylic acids and derivatives	Amino acids, peptides, and analogues	899816-95-6	231.098	1.56413	M-H	C9H16N2O5	0	57.5	metab_16881	neg
pos_6460	L-Proline, 1-(1-L-leucyl-L-prolyl)-	0.001394	0.002882	1.5425	1.5456	0.8013	-0.3196	yes	-	-	-	-	-	-	-	HMDB0253022	Organic acids and derivatives	Carboxylic acids and derivatives	Amino acids, peptides, and analogues	-	326.207	2.15492	M+H	C16H27N3O4	0	70.6	metab_5863	pos
pos_2425	PI(22:3(10Z,13Z,16Z)/22:6(4Z,7Z,11E,13Z,15E,19Z)-2OH(10S,17))	4.32e-06	1.74e-05	1.5409	1.5409	1.2142	0.28	yes	-	-	-	-	-	-	-	HMDB0277878	Not Available	Not Available	Not Available	-	526.279	2.87258	M+2Na	C54H87O15P	0	63.9	metab_1536	pos
neg_8925	Laurenoniolide	5.16e-08	2.66e-07	1.5407	1.5397	0.7169	-0.4802	yes	C09492	-	-	-	-	-	-	HMDB0302705	Lipids and lipid-like molecules	Prenol lipids	Terpene lactones	-	639.322	2.22015	2M+Hac-H	C17H22O4	0	30.8	metab_16484	neg
pos_6022	2-[2-(4-Hydroxy-3-methoxyphenyl)ethyl]-5-octylfuran	3.48e-08	3.19e-07	1.5404	1.5409	1.2251	0.2929	yes	-	-	-	-	-	-	-	HMDB0040928	Lipids and lipid-like molecules	Fatty Acyls	Fatty acids and conjugates	143114-92-5	375.191	2.73993	M+2Na-H	C21H30O3	0	56.7	metab_5384	pos
neg_6693	Virginiamycin m1	1.31e-10	2.13e-09	1.5381	1.5379	0.6796	-0.5572	yes	C11299	-	-	-	-	-	-	HMDB0259836	Phenylpropanoids and polyketides	Macrolide lactams	Not Available	21411-53-0	546.221	4.7146	M+Na-2H	C28H35N3O7	0	74.5	metab_14049	neg
neg_3460	Dihydroconiferyl alcohol	3.57e-12	1.24e-10	1.5379	1.5372	0.6822	-0.5517	yes	C10448	-	-	-	-	-	-	HMDB0303757	Benzenoids	Phenols	Methoxyphenols	2305-13-7	545.273	3.89567	3M-H	C10H14O3	0	66.7	metab_10555	neg
neg_633	Bisphenol A	5.57e-12	1.73e-10	1.5358	1.5352	0.7535	-0.4083	yes	C13624	-	-	map00363;map01100;map05207;map01120	Bisphenol degradation;Metabolic pathways;Chemical carcinogenesis - receptor activation;Microbial metabolism in diverse environments	Metabolism;Metabolism;Human Diseases;Metabolism	Xenobiotics biodegradation and metabolism;Global and overview maps;Cancer: overview;Global and overview maps	HMDB0032133;MJDBOTE0000553	Benzenoids	Benzene and substituted derivatives	Diphenylmethanes	1980-05-07	683.337	3.1921	M-H2O-H, 3M-H	C15H16O2	0	40.5	metab_13649	neg
neg_7819	8'-hydroxyabscisate	0.001963	0.002855	1.5352	1.5491	0.6418	-0.6398	yes	C15514	-	-	map00906;map01110	Carotenoid biosynthesis;Biosynthesis of secondary metabolites	Metabolism;Metabolism	Metabolism of terpenoids and polyketides;Global and overview maps	HMDB0304246	Lipids and lipid-like molecules	Prenol lipids	Sesquiterpenoids	-	260.104	3.40113	M-H2O-H	C15H19O5-	0	33.8	metab_15272	neg
neg_495	D-Galactose	0.0004507	0.0007282	1.5349	1.5404	0.7407	-0.4331	yes	C00124	Carbohydrates	Monosaccharides	map01100;map02030;map04978;map04973;map00052;map02060	Metabolic pathways;Bacterial chemotaxis;Mineral absorption;Carbohydrate digestion and absorption;Galactose metabolism;Phosphotransferase system (PTS)	Metabolism;Cellular Processes;Organismal Systems;Organismal Systems;Metabolism;Environmental Information Processing	Global and overview maps;Cell motility;Digestive system;Digestive system;Carbohydrate metabolism;Membrane transport	HMDB0250761;HMDB0003449;HMDB0000143;PW_C000093;MJDBOTE0001042	Organic oxygen compounds	Organooxygen compounds	Carbohydrates and carbohydrate conjugates	3646-73-9;7296-64-2;59-23-4;10257-28-0;59-23-4	201.038	0.744367	M+Na-2H, M+K-2H	C6H12O6	45.6	0	metab_17602	neg
neg_8373	Delta-Hydroxylysylnorleucine	6.12e-12	1.87e-10	1.5332	1.5324	0.7365	-0.4413	yes	-	-	-	-	-	-	-	HMDB0253190	Organic acids and derivatives	Carboxylic acids and derivatives	Amino acids, peptides, and analogues	-	272.162	2.86292	M-H2O-H	C12H25N3O5	0	46.2	metab_15878	neg
neg_4057	Glycyl-prolyl-arginyl-valyl-valyl-glutamic acid	3.6e-08	1.99e-07	1.5317	1.5323	0.7461	-0.4225	yes	-	-	-	-	-	-	-	HMDB0252831	Organic acids and derivatives	Carboxylic acids and derivatives	Amino acids, peptides, and analogues	-	676.334	4.83802	M+Na-2H	C28H49N9O9	0	70.2	metab_11201	neg
neg_9970	L-4-Hydroxyglutamate semialdehyde	1.6e-10	2.45e-09	1.5293	1.5287	0.7184	-0.4772	yes	C05938	-	-	map01100;map00330	Metabolic pathways;Arginine and proline metabolism	Metabolism;Metabolism	Global and overview maps;Amino acid metabolism	PW_C002808;HMDB0006556	Organic acids and derivatives	Carboxylic acids and derivatives	Amino acids, peptides, and analogues	-	168.027	0.560333	M+Na-2H	C5H9NO4	0	48.2	metab_17566	neg
pos_6732	Leu Asp Glu	1.24e-05	4.34e-05	1.528	1.5262	0.8199	-0.2864	yes	-	-	-	-	-	-	-	-	-	-	-	-	376.171	1.90642	M+H	C15H25N3O8	58.5	0	metab_6140	pos
pos_2525	Trigofoenoside E1	0.0001524	0.0003956	1.5276	1.5275	1.2289	0.2973	yes	-	-	-	-	-	-	-	HMDB0038617	Lipids and lipid-like molecules	Steroids and steroid derivatives	Steroidal glycosides	101910-70-7	547.261	3.09097	M+2Na	C51H84O22	0	35.4	metab_1642	pos
pos_4762	(10Z)-12-Hydroxyhexadecenoylcarnitine	3.05e-08	2.87e-07	1.5272	1.5275	1.2131	0.2787	yes	-	-	-	-	-	-	-	HMDB0241477	Lipids and lipid-like molecules	Fatty Acyls	Fatty acid esters	-	414.32	5.65275	M+H	C23H43NO5	0	58.8	metab_4065	pos
pos_5992	3-Dehydronobilin	0.005847	0.01051	1.5251	1.5208	0.7135	-0.4869	yes	-	-	-	-	-	-	-	HMDB0036691	Lipids and lipid-like molecules	Prenol lipids	Terpene lactones	63529-14-6	408.176	2.78683	M+ACN+Na	C20H24O5	0	36	metab_5350	pos
neg_3684	DG(2:0/PGF2alpha/0:0)	1.41e-10	2.24e-09	1.5239	1.5234	0.7526	-0.4101	yes	-	-	-	-	-	-	-	HMDB0296915	Not Available	Not Available	Not Available	-	515.284	4.19705	M+FA-H	C25H42O8	0	59.3	metab_10798	neg
pos_128	2-Butanone peroxide	4.94e-09	6.64e-08	1.5226	1.5222	1.2172	0.2836	yes	-	-	-	-	-	-	-	HMDB0245041	Organic oxygen compounds	Organic hydroperoxides	Not Available	-	233.099	1.91418	M+H-2H2O, M+K, M+Na	C8H18O6	0	32.7	metab_307	pos
neg_2818	DG(2:0/LTE4/0:0)	1.95e-10	2.82e-09	1.5225	1.5216	0.7583	-0.3992	yes	-	-	-	-	-	-	-	HMDB0296923	Not Available	Not Available	Not Available	-	590.258	3.11213	M+Cl	C28H45NO8S	0	60.4	metab_9849	neg
neg_2732	Gluten exorphin A5	5.8e-07	2.03e-06	1.5215	1.5221	1.3724	0.4567	yes	-	-	-	-	-	-	-	HMDB0059793	Organic acids and derivatives	Carboxylic acids and derivatives	Amino acids, peptides, and analogues	-	598.248	3.01578	M-H	C29H37N5O9	0	73.9	metab_9755	neg
neg_2628	Americine	4.59e-10	5.48e-09	1.5206	1.5195	0.7143	-0.4853	yes	C09996	-	-	-	-	-	-	HMDB0034441	Organic acids and derivatives	Carboxylic acids and derivatives	Amino acids, peptides, and analogues	18867-84-0	582.254	2.8869	M+K-2H	C31H39N5O4	0	58.4	metab_9639	neg
neg_7398	LysoPE(P-16:0/0:0)	4.31e-06	1.15e-05	1.5176	1.517	0.6967	-0.5214	yes	-	-	-	-	-	-	-	HMDB0011152	Lipids and lipid-like molecules	Glycerophospholipids	Glycerophosphoethanolamines	174062-72-7	458.262	3.84917	M+Na-2H	C21H44NO6P	0	52.4	metab_14813	neg
pos_3462	Methyl 4,7,10,13,16-docosapentaenoate	1.22e-06	5.83e-06	1.5157	1.5153	1.233	0.3022	yes	-	-	-	-	-	-	-	HMDB0254570	Lipids and lipid-like molecules	Fatty Acyls	Fatty acid esters	-	309.257	5.84807	M+H-2H2O	C23H36O2	0	47	metab_2639	pos
pos_2419	Nomilinic acid	1.1e-07	8.22e-07	1.5144	1.5146	1.2221	0.2894	yes	-	-	-	-	-	-	-	HMDB0035771	Organic oxygen compounds	Organooxygen compounds	Carbohydrates and carbohydrate conjugates	35930-20-2	565.261	2.86475	M+CH3OH+H	C28H36O10	0	55.5	metab_1529	pos
neg_2852	(3E,6Z)-3-Benzylidene-6-[[4-[2-(dimethylamino)ethoxy]phenyl]methylidene]piperazine-2,5-dione	1.53e-09	1.46e-08	1.5139	1.5141	0.7645	-0.3875	yes	-	-	-	-	-	-	-	HMDB0259935	Benzenoids	Phenol ethers	Not Available	-	753.343	3.1521	2M-H	C22H23N3O3	0	45.4	metab_9887	neg
neg_1007	Cysteinyl-Threonine	1.15e-08	7.68e-08	1.5078	1.5061	0.7553	-0.4049	yes	-	-	-	-	-	-	-	HMDB0028785	Organic acids and derivatives	Carboxylic acids and derivatives	Amino acids, peptides, and analogues	-	203.049	1.69913	M-H2O-H, 2M-H	C7H14N2O4S	0	50.2	metab_7597	neg
neg_3793	HBOA trihexose	6.88e-08	3.4e-07	1.5067	1.5083	0.7062	-0.5019	yes	C08283	-	-	-	-	-	-	HMDB0304552	Organic acids and derivatives	Carboxylic acids and derivatives	Amino acids, peptides, and analogues	-	202.108	4.36505	M+FA-H	C8H15NO2	0	31.9	metab_10915	neg
pos_2063	PA(PGJ2/12:0)	2.75e-07	1.7e-06	1.5057	1.5068	0.8165	-0.2925	yes	-	-	-	-	-	-	-	HMDB0262779	Not Available	Not Available	Not Available	-	347.192	2.2094	M+H+Na	C35H59O10P	0	39	metab_1142	pos
neg_8810	L-Phenylalanine	4.23e-09	3.39e-08	1.5043	1.5048	0.7751	-0.3676	yes	C00079	Peptides	Amino acids	map00996;map00997;map02010;map00999;map01110;map00960;map00470;map00966;map00940;map01064;map01063;map01061;map01060;map01100;map01210;map01230;map00360;map00400;map04978;map00460;map04974;map00970;map05230;map01070	Biosynthesis of various alkaloids;Biosynthesis of various other secondary metabolites;ABC transporters;Biosynthesis of various plant secondary metabolites;Biosynthesis of secondary metabolites;Tropane, piperidine and pyridine alkaloid biosynthesis;D-Amino acid metabolism;Glucosinolate biosynthesis;Phenylpropanoid biosynthesis;Biosynthesis of alkaloids derived from ornithine, lysine and nicotinic …	Metabolism;Metabolism;Environmental Information Processing;Metabolism;Metabolism;Metabolism;Metabolism;Metabolism;Metabolism;Metabolism;Metabolism;Metabolism;Metabolism;Metabolism;Metabolism;Metabolism;Metabolism;Metabolism;Organismal Systems;Metabolism;Organismal Systems;Genetic Information Processing;Human Diseases;Metabolism	Biosynthesis of other secondary metabolites;Biosynthesis of other secondary metabolites;Membrane transport;Biosynthesis of other secondary metabolites;Global and overview maps;Biosynthesis of other secondary metabolites;Metabolism of other amino acids;Biosynthesis of other secondary metabolites;Biosynthesis of other secondary metabolites;Chemical structure transformation maps;Chemical structure t…	PW_C000104;HMDB0250791;HMDB0000159;MJDBAA00000196	Organic acids and derivatives	Carboxylic acids and derivatives	Amino acids, peptides, and analogues	63-91-2	164.071	2.308	M-H	C9H11NO2	96.9	0	metab_16358	neg
neg_8098	Pegvaliase-Pqpz	2.05e-05	4.5e-05	1.5007	1.5014	0.6985	-0.5176	yes	-	-	-	-	-	-	-	HMDB0304893	Organic acids and derivatives	Carboxylic acids and derivatives	Amino acids, peptides, and analogues	-	355.162	3.12012	M+K-2H	C15H30N2O5	0	32.7	metab_15578	neg
neg_8414	Arginylisoleucine	1.42e-06	4.38e-06	1.5001	1.4982	0.6831	-0.5499	yes	-	-	-	-	-	-	-	HMDB0028712	Organic acids and derivatives	Carboxylic acids and derivatives	Amino acids, peptides, and analogues	62632-70-6	268.178	2.81438	M-H2O-H	C12H25N5O3	0	38.7	metab_15924	neg
neg_3608	2-Hydroxyphenylacetic Acid	1.81e-10	2.68e-09	1.4956	1.4955	1.3559	0.4393	yes	C05852	-	-	map01100;map00360;map01120;map00643	Metabolic pathways;Phenylalanine metabolism;Microbial metabolism in diverse environments;Styrene degradation	Metabolism;Metabolism;Metabolism;Metabolism	Global and overview maps;Amino acid metabolism;Global and overview maps;Xenobiotics biodegradation and metabolism	HMDB0000669;MJDBOTE0000611	Benzenoids	Benzene and substituted derivatives	Phenylacetic acids	614-75-5	151.039	4.10102	M-H	C8H8O3	64.4	0	metab_10715	neg
pos_2468	Caffeoylferuloylspermidine	0.0001849	0.0004708	1.4929	1.4908	1.3135	0.3934	yes	-	-	-	-	-	-	-	HMDB0033470	Phenylpropanoids and polyketides	Cinnamic acids and derivatives	Hydroxycinnamic acids and derivatives	114916-07-3	506.224	2.95065	M+Na	C26H33N3O6	0	52.1	metab_1582	pos
pos_2547	Tyr Asp Ile	1.26e-10	3.46e-09	1.4928	1.4926	0.8018	-0.3187	yes	-	-	-	-	-	-	-	-	-	-	-	-	410.191	3.12997	M+H	C19H27N3O7	68.8	0	metab_1665	pos
neg_2700	Isoleucyl-Tyrosine	2.62e-11	6e-10	1.4919	1.4922	0.7193	-0.4753	yes	-	-	-	-	-	-	-	HMDB0028919	Organic acids and derivatives	Carboxylic acids and derivatives	Amino acids, peptides, and analogues	-	293.151	2.97525	M-H	C15H22N2O4	0	54.7	metab_9720	neg
pos_2182	Latrunculin a	3.98e-09	5.7e-08	1.4918	1.4922	1.226	0.294	yes	C16901	-	-	-	-	-	-	HMDB0253989	Phenylpropanoids and polyketides	Macrolides and analogues	Not Available	76343-93-6	466.161	2.40453	M+2Na-H	C22H31NO5S	0	41.4	metab_1272	pos
pos_6632	Atosiban	7.16e-05	0.0002016	1.4878	1.4886	1.2233	0.2908	yes	-	-	-	-	-	-	-	HMDB0248705	Organic acids and derivatives	Carboxylic acids and derivatives	Amino acids, peptides, and analogues	-	497.732	1.93727	M+2H	C43H67N11O12S2	0	87.4	metab_6038	pos
pos_5739	(2S,4S)-Pinnatanine	1.31e-08	1.44e-07	1.4845	1.4848	0.7967	-0.3279	yes	-	-	-	-	-	-	-	HMDB0029439;LMFA01050445	Organic acids and derivatives	Carboxylic acids and derivatives	Amino acids, peptides, and analogues	35214-74-5	245.113	3.2625	M+H	C10H16N2O5	0	32.9	metab_5083	pos
pos_2307	Tyr Leu	9.35e-09	1.1e-07	1.4826	1.4822	0.8217	-0.2834	yes	-	-	-	-	-	-	-	-	-	-	-	-	295.165	2.6305	M+H	C15H22N2O4	41.4	0	metab_1405	pos
neg_3579	Leukotriene F4	1.75e-06	5.26e-06	1.4808	1.4843	0.7343	-0.4456	yes	C06462	Lipids	Eicosanoids	map00590;map01100	Arachidonic acid metabolism;Metabolic pathways	Metabolism;Metabolism	Lipid metabolism;Global and overview maps	LMFA03020076;LMFA03020009;HMDB0006465	Lipids and lipid-like molecules	Fatty Acyls	Eicosanoids	-	567.278	4.06103	M-H	C28H44N2O8S	0	48.6	metab_10684	neg
neg_2598	Uridine, 2'-deoxy-2'-fluoro-2'-methyl-, (2'R)-	4.74e-05	9.46e-05	1.4786	1.4774	0.7171	-0.4797	yes	-	-	-	-	-	-	-	HMDB0247529	Nucleosides, nucleotides, and analogues	Pyrimidine nucleosides	Pyrimidine 2''-deoxyribonucleosides	-	305.081	2.84632	M+FA-H	C10H13FN2O5	0	45.5	metab_9606	neg
neg_10269	Glycyl-Lysine	2.61e-06	7.39e-06	1.4758	1.4764	0.6674	-0.5835	yes	-	-	-	-	-	-	-	HMDB0028846	Organic acids and derivatives	Carboxylic acids and derivatives	Amino acids, peptides, and analogues	-	202.119	0.464017	M-H	C8H17N3O3	0	35.6	metab_7816	neg
pos_7438	Glutaminylhydroxyproline	1.69e-06	7.77e-06	1.4749	1.4764	0.8252	-0.2773	yes	-	-	-	-	-	-	-	HMDB0028798	Organic acids and derivatives	Carboxylic acids and derivatives	Amino acids, peptides, and analogues	-	298.08	0.623083	M+K	C10H17N3O5	0	38.3	metab_6885	pos
neg_401	N-(Hydroxymethyl)acrylamide	1.51e-07	6.49e-07	1.4738	1.4744	0.7376	-0.4391	yes	C19456	-	-	-	-	-	-	HMDB0255023	Organic acids and derivatives	Carboxylic acids and derivatives	Acrylic acids and derivatives	924-42-5	247.093	0.62485	M-H2O-H, 2M+FA-H	C4H7NO2	0	34.2	metab_11149	neg
pos_5553	Phe Leu	2.56e-07	1.6e-06	1.4723	1.4719	0.8332	-0.2632	yes	-	-	-	-	-	-	-	-	-	-	-	-	279.17	3.81357	M+H	C15H22N2O3	68.8	0	metab_4899	pos
neg_9865	L-Histidinol	7.95e-06	1.95e-05	1.4722	1.4674	0.703	-0.5085	yes	C00860	-	-	map01100;map00340;map01110;map01230	Metabolic pathways;Histidine metabolism;Biosynthesis of secondary metabolites;Biosynthesis of amino acids	Metabolism;Metabolism;Metabolism;Metabolism	Global and overview maps;Amino acid metabolism;Global and overview maps;Global and overview maps	HMDB0003431	Organic nitrogen compounds	Organonitrogen compounds	Amines	4836-52-6	327.178	0.616867	2M+FA-H	C6H11N3O	0	35.6	metab_17454	neg
neg_7898	PC(20:5(7Z,9Z,11E,13E,17Z)-3OH(5,6,15)/2:0)	8.2e-05	0.0001548	1.4716	1.4685	0.6733	-0.5708	yes	-	-	-	-	-	-	-	HMDB0288873	Not Available	Not Available	Not Available	-	630.31	3.31262	M-H	C30H50NO11P	0	68.7	metab_15357	neg
neg_2779	3-Amino-4-methoxybenzanilide	3.55e-07	1.34e-06	1.4693	1.4676	1.369	0.4531	yes	-	-	-	-	-	-	-	HMDB0245807	Benzenoids	Benzene and substituted derivatives	Anilides	-	725.311	3.07162	3M-H	C14H14N2O2	0	81.7	metab_9805	neg
neg_7396	Xanthohumol	2.98e-08	1.69e-07	1.4684	1.4677	1.3231	0.4039	yes	C16417	-	-	map00941	Flavonoid biosynthesis	Metabolism	Biosynthesis of other secondary metabolites	LMPK12120294;HMDB0030610;HMDB0037479;MJDBOTE0001182	Phenylpropanoids and polyketides	Linear 1,3-diarylpropanoids	Chalcones and dihydrochalcones	6754-58-1;115063-39-3	753.295	3.84917	2M+FA-H	C21H22O5	0	44.2	metab_17617	neg
neg_8613	[(2S,3R)-2-Amino-3-hydroxybutanoyl] (2S)-pyrrolidine-2-carboxylate	7.34e-08	3.57e-07	1.465	1.4642	0.7421	-0.4303	yes	-	-	-	-	-	-	-	HMDB0257877	Organic acids and derivatives	Carboxylic acids and derivatives	Amino acids, peptides, and analogues	-	431.214	2.55692	2M-H	C9H16N2O4	0	50.8	metab_16141	neg
neg_3973	Gentamicin C	1.81e-08	1.12e-07	1.4626	1.4617	0.7544	-0.4065	yes	C01918	Antibiotics	Aminoglycosides	-	-	-	-	HMDB0252688	Organic oxygen compounds	Organooxygen compounds	Carbohydrates and carbohydrate conjugates	11097-82-8	470.262	4.66198	M+Na-2H	C19H39N5O7	0	59.8	metab_11108	neg
neg_6541	Fumarycarnitine	3.45e-10	4.39e-09	1.4621	1.4613	0.7451	-0.4246	yes	-	-	-	-	-	-	-	LMFA07070064;HMDB0013134	Lipids and lipid-like molecules	Fatty Acyls	Fatty acid esters	-	258.098	5.01682	M-H	C11H17NO6	0	42.2	metab_13881	neg
neg_6842	3-Benzyl-5-(6-carboxyhexyl)-1-(2-cyclohexyl-2-hydroxyethylamino)hydantoin	8.06e-07	2.68e-06	1.4621	1.4599	0.7176	-0.4788	yes	-	-	-	-	-	-	-	HMDB0249489	Organoheterocyclic compounds	Azolidines	Imidazolidines	-	494.247	4.47717	M+Cl	C25H37N3O5	0	63.7	metab_14212	neg
pos_6742	(2S,2'S)-Pyrosaccharopine	1.89e-05	6.28e-05	1.4618	1.4592	0.8211	-0.2843	yes	-	-	-	-	-	-	-	HMDB0038676	Organic acids and derivatives	Carboxylic acids and derivatives	Amino acids, peptides, and analogues	38495-84-0	276.155	1.90642	M+NH4	C11H18N2O5	0	56.7	metab_6151	pos
neg_1657	Calystegine A6	5.9e-06	1.5e-05	1.4592	1.459	1.4158	0.5016	yes	-	-	-	-	-	-	-	HMDB0031345	Alkaloids and derivatives	Tropane alkaloids	Not Available	177794-04-6	204.087	0.6487	M+FA-H	C7H13NO3	0	49.5	metab_8604	neg
pos_4772	Jervine	5.86e-05	0.0001695	1.4592	1.4601	1.222	0.2893	yes	C10811	-	-	map01066	Biosynthesis of alkaloids derived from terpenoid and polyketide	Metabolism	Chemical structure transformation maps	HMDB0253731;MJDBOTE0000999	Lipids and lipid-like molecules	Steroids and steroid derivatives	Steroidal alkaloids	469-59-0	426.3	5.63707	M+H	C27H39NO3	0	62.1	metab_4076	pos
neg_6749	1-Nonadecanoyl-glycero-3-phosphoserine	1.13e-07	5.11e-07	1.4589	1.4588	1.3549	0.4382	yes	-	-	-	-	-	-	-	LMGP03050028;HMDB0243972	Lipids and lipid-like molecules	Glycerophospholipids	Glycerophosphoserines	-	576.269	4.61242	M+K-2H	C25H50NO9P	0	69.7	metab_14110	neg
neg_2806	2'',6''-O-Diacetyloninin	3.13e-06	8.67e-06	1.4577	1.4555	0.7435	-0.4275	yes	-	-	-	-	-	-	-	HMDB0302015	Organoheterocyclic compounds	Pteridines and derivatives	Not Available	-	461.189	3.0956	2M+FA-H	C9H12N4O2	0	61.2	metab_9836	neg
neg_8228	3-(1-Hydroxymethyl-1-propenyl)pentanedioic acid	9.13e-11	1.61e-09	1.4543	1.4539	0.7937	-0.3334	yes	-	-	-	-	-	-	-	HMDB0033092	Lipids and lipid-like molecules	Fatty Acyls	Fatty acids and conjugates	-	463.183	3.00725	2M+Hac-H	C9H14O5	0	33.5	metab_15720	neg
neg_3094	Threonyltryptophan	2.57e-07	1.01e-06	1.4541	1.4538	0.705	-0.5044	yes	-	-	-	-	-	-	-	HMDB0029072	Organic acids and derivatives	Carboxylic acids and derivatives	Amino acids, peptides, and analogues	186761-42-2	304.13	3.44182	M-H	C15H19N3O4	0	42.5	metab_10154	neg
neg_7816	Cerulenin	1.09e-09	1.12e-08	1.4531	1.4535	0.7232	-0.4675	yes	C12058	-	-	-	-	-	-	HMDB0015168;LMFA08010013	Organoheterocyclic compounds	Epoxides	Oxirane carboxylic acids and derivatives	17397-89-6	445.23	3.40113	2M-H	C12H17NO3	0	68.1	metab_15269	neg
neg_3485	Sulfoglycolithocholate(2-)	1.79e-08	1.11e-07	1.4524	1.4511	0.7576	-0.4004	yes	-	-	-	-	-	-	-	HMDB0062801	Lipids and lipid-like molecules	Steroids and steroid derivatives	Bile acids, alcohols and derivatives	-	512.272	3.92518	M-H	C26H43NO7S	0	49.6	metab_10582	neg
neg_3095	(3R-(3alpha,4alpha(2R*,3R*),5beta,6beta))-5-Methoxy-4-(2-methyl-3-(3-methyl-2-butenyl)oxiranyl)-1-oxaspiro(2.5)octan-6-ol carbamate	2.07e-07	8.48e-07	1.4518	1.4488	0.6998	-0.5149	yes	-	-	-	-	-	-	-	HMDB0260151	Organic acids and derivatives	Carboxylic acids and derivatives	Amino acids, peptides, and analogues	-	360.156	3.44182	M+Cl	C17H27NO5	0	34.8	metab_10155	neg
pos_1431	4-Amino-1-piperidinecarboxylic acid	6.46e-08	5.35e-07	1.4504	1.4506	0.8265	-0.275	yes	C16837	-	-	-	-	-	-	HMDB0060385	Organoheterocyclic compounds	Piperidines	Piperidinecarboxylic acids and derivatives	959317-82-9	186.124	0.599817	M+ACN+H	C6H12N2O2	0	47.9	metab_474	pos
neg_2548	4-hydroxy-2-nonenal-[Cys-Gly] conjugate	2.26e-09	2.01e-08	1.4481	1.4461	0.7712	-0.3747	yes	-	-	-	-	-	-	-	HMDB0304175	Organic acids and derivatives	Carboxylic acids and derivatives	Amino acids, peptides, and analogues	-	667.305	2.77452	2M-H	C14H26N2O5S	0	78.5	metab_9552	neg
pos_7681	5-Hydroxylysine	7.92e-09	9.74e-08	1.4472	1.447	0.8021	-0.3182	yes	C16741	-	-	map01100;map00310	Metabolic pathways;Lysine degradation	Metabolism;Metabolism	Global and overview maps;Amino acid metabolism	HMDB0245508;HMDB0000450	Organic acids and derivatives	Carboxylic acids and derivatives	Amino acids, peptides, and analogues	1190-94-9	163.108	0.467433	M+H	C6H14N2O3	89.9	0	metab_7148	pos
neg_3734	Dipivefrin	9.5e-07	3.09e-06	1.4441	1.4453	0.7199	-0.4741	yes	C06963	-	-	-	-	-	-	HMDB0014592	Benzenoids	Phenol esters	Not Available	52365-63-6	372.177	4.27705	M+Na-2H	C19H29NO5	0	32.1	metab_10851	neg
neg_2011	1-Methylguanine	7.13e-07	2.41e-06	1.4415	1.4407	0.7053	-0.5037	yes	C04152	-	-	-	-	-	-	HMDB0003282	Organoheterocyclic compounds	Imidazopyrimidines	Purines and purine derivatives	938-85-2	164.057	1.82747	M-H	C6H7N5O	73.6	0	metab_8970	neg
pos_7155	Nopalinic acid	2.19e-07	1.42e-06	1.4391	1.4377	0.8257	-0.2763	yes	C01683	-	-	-	-	-	-	HMDB0029437	Organic acids and derivatives	Carboxylic acids and derivatives	Amino acids, peptides, and analogues	63409-16-5	245.113	1.22412	M+H-H2O	C10H18N2O6	0	50.9	metab_6595	pos
neg_6437	Indeloxazine	1.47e-07	6.36e-07	1.4384	1.4366	0.7337	-0.4467	yes	C10918	-	-	-	-	-	-	HMDB0253450	Benzenoids	Indenes and isoindenes	Not Available	60929-23-9	461.241	5.22385	2M-H	C14H17NO2	0	64.5	metab_13766	neg
pos_5726	Pratosartan	2.81e-05	8.9e-05	1.4356	1.435	1.2104	0.2754	yes	-	-	-	-	-	-	-	HMDB0256736	Benzenoids	Benzene and substituted derivatives	Biphenyls and derivatives	-	449.202	3.27803	M+Na	C25H26N6O	0	42.5	metab_5070	pos
pos_7686	DL-Ornithino-L-alanine	5.4e-07	2.99e-06	1.4338	1.4334	0.8009	-0.3204	yes	-	-	-	-	-	-	-	HMDB0029448	Organic acids and derivatives	Carboxylic acids and derivatives	Amino acids, peptides, and analogues	25693-39-4	220.129	0.459617	M+H	C8H17N3O4	0	39	metab_7153	pos
neg_7661	1,2,3,10-Tetramethoxy-7-(methylamino)-6,7-dihydro-5H-benzo[a]heptalen-9-one	1.43e-10	2.26e-09	1.4311	1.4299	0.7874	-0.3449	yes	C11250	-	-	map00950;map01110;map01063	Isoquinoline alkaloid biosynthesis;Biosynthesis of secondary metabolites;Biosynthesis of alkaloids derived from shikimate pathway	Metabolism;Metabolism;Metabolism	Biosynthesis of other secondary metabolites;Global and overview maps;Chemical structure transformation maps	HMDB0250401	Hydrocarbon derivatives	Tropones	Not Available	-	741.342	3.56182	2M-H	C21H25NO5	0	51	metab_15101	neg
neg_2799	Mucronine D	5.02e-09	3.88e-08	1.4307	1.4303	0.7655	-0.3856	yes	C10009	-	-	-	-	-	-	HMDB0029335	Organic acids and derivatives	Carboxylic acids and derivatives	Amino acids, peptides, and analogues	38496-00-3	682.353	3.0876	M+Na-2H	C37H51N5O6	0	30.5	metab_9827	neg
neg_3172	Norbinaltorphimine	4.45e-06	1.18e-05	1.4291	1.4298	0.7487	-0.4175	yes	C18130	-	-	-	-	-	-	HMDB0255724	Alkaloids and derivatives	Morphinans	Not Available	105618-26-6	696.285	3.5378	M+Cl	C40H43N3O6	0	83.8	metab_10240	neg
pos_6246	1-[2-(benzylamino)-2-oxoethyl]piperidine-4-carboxamide	2.69e-08	2.6e-07	1.4289	1.428	0.8244	-0.2786	yes	-	-	-	-	-	-	-	-	-	-	-	-	276.17	2.42798	M+H	C15H21N3O2	76.1	0	metab_5628	pos
neg_3995	Fumitremorgin B	6.94e-09	5.06e-08	1.4246	1.4232	0.7577	-0.4004	yes	C20630	-	-	map01100;map01110;map00404	Metabolic pathways;Biosynthesis of secondary metabolites;Staurosporine biosynthesis	Metabolism;Metabolism;Metabolism	Global and overview maps;Global and overview maps;Biosynthesis of other secondary metabolites	HMDB0030203	Organoheterocyclic compounds	Indoles and derivatives	Carbazoles	12626-17-4	478.231	4.71913	M-H	C27H33N3O5	0	48.8	metab_11131	neg
neg_6780	Porson	2.16e-05	4.7e-05	1.4239	1.4204	0.7422	-0.4301	yes	-	-	-	-	-	-	-	HMDB0030810	Phenylpropanoids and polyketides	Diarylheptanoids	Cyclic diarylheptanoids	56222-03-8	421.14	4.56542	M+Cl	C22H26O6	0	64.7	metab_14144	neg
neg_1456	3-Methoxytyrosine	3.52e-09	2.91e-08	1.4233	1.4239	0.7438	-0.4271	yes	-	-	-	-	-	-	-	HMDB0060747;HMDB0001434	Organic acids and derivatives	Carboxylic acids and derivatives	Amino acids, peptides, and analogues	7636-26-2	210.077	2.308	M-H, M+Na-2H	C10H13NO4	0	33.9	metab_8383	neg
neg_1163	[(1S,3S,7R,8R,8As)-8-[2-[(4R)-4-hydroxy-6-oxooxan-2-yl]ethyl]-3,7-dimethyl-1,2,3,7,8,8a-hexahydronaphthalen-1-yl] (2R)-2-methylbutanoate	5.29e-07	1.87e-06	1.421	1.4208	1.2758	0.3514	yes	-	-	-	-	-	-	-	HMDB0248085	Organoheterocyclic compounds	Lactones	Delta valerolactones	-	403.249	5.71632	M-H, M+FA-H	C24H36O5	0	31.2	metab_8061	neg
neg_8741	Didanosine	1.83e-08	1.13e-07	1.4189	1.4188	0.7477	-0.4194	yes	C06953	-	-	-	-	-	-	HMDB0015037;PW_C009350	Nucleosides, nucleotides, and analogues	Purine nucleosides	Purine 2'',3''-dideoxyribonucleosides	69655-05-6	281.089	2.39602	M+FA-H	C10H12N4O3	50	0	metab_16281	neg
neg_7560	Milbemycin alpha9	3.5e-10	4.45e-09	1.4174	1.417	1.2894	0.3667	yes	-	-	-	-	-	-	-	HMDB0254730;HMDB0254721;HMDB0254726;HMDB0242623	Phenylpropanoids and polyketides	Macrolides and analogues	Milbemycins	-	672.3	3.65033	M+Cl	C36H47NO9	0	30.3	metab_14992	neg
neg_4313	Valaciclovir	9.9e-07	3.2e-06	1.4162	1.4187	0.744	-0.4266	yes	C07184	-	-	map04976	Bile secretion	Organismal Systems	Digestive system	HMDB0014716	Organic acids and derivatives	Carboxylic acids and derivatives	Amino acids, peptides, and analogues	124832-27-5	647.308	5.36468	2M-H	C13H20N6O4	0	39.7	metab_11484	neg
neg_4179	Moexipril	1.06e-11	2.97e-10	1.4152	1.4151	0.7782	-0.3618	yes	C07704	-	-	-	-	-	-	HMDB0257333;PW_C009168;HMDB0014829	Organic acids and derivatives	Carboxylic acids and derivatives	Amino acids, peptides, and analogues	103775-10-6	479.215	5.11945	M-H2O-H	C27H34N2O7	0	37.7	metab_11335	neg
neg_2271	Stavudine	1.97e-09	1.8e-08	1.4147	1.4137	0.7762	-0.3655	yes	C07312	-	-	-	-	-	-	PW_C009132;HMDB0014787	Nucleosides, nucleotides, and analogues	Nucleoside and nucleotide analogues	Not Available	3056-17-5	447.156	2.34802	2M-H	C10H12N2O4	0	31.4	metab_9251	neg
neg_3319	((2R,3S)-3-Amino-2-hydroxy-2-(1H-imidazol-4-ylmethyl)-5-methyl)-5-methylhexanoic Acid	5.97e-10	6.83e-09	1.414	1.4126	0.7736	-0.3703	yes	-	-	-	-	-	-	-	HMDB0242228	Organic acids and derivatives	Carboxylic acids and derivatives	Amino acids, peptides, and analogues	-	527.283	3.705	2M+FA-H	C11H19N3O3	0	32.2	metab_10398	neg
pos_2244	Tenuazonic acid	1.14e-05	4.01e-05	1.414	1.4122	0.8216	-0.2834	yes	C08511	-	-	-	-	-	-	HMDB0036074	Organoheterocyclic compounds	Pyrrolines	Not Available	27778-66-1;610-88-8	180.102	2.51352	M+H-H2O	C10H15NO3	0	46.8	metab_1338	pos
neg_3499	MG(0:0/LTE4/0:0)	1.71e-06	5.15e-06	1.4136	1.4135	0.7335	-0.4471	yes	-	-	-	-	-	-	-	HMDB0260532	Not Available	Not Available	Not Available	-	558.278	3.94918	M+FA-H	C26H43NO7S	0	55.9	metab_10596	neg
neg_8765	Cinepazide	1.29e-07	5.72e-07	1.4104	1.4082	0.7678	-0.3812	yes	-	-	-	-	-	-	-	HMDB0250262	Phenylpropanoids and polyketides	Cinnamic acids and derivatives	Not Available	-	462.221	2.34802	M+FA-H	C22H31N3O5	0	49.7	metab_16307	neg
neg_9438	Gamma-Glutamylvaline	5.46e-12	1.73e-10	1.4104	1.4092	0.7786	-0.361	yes	-	-	-	-	-	-	-	HMDB0011172	Organic acids and derivatives	Carboxylic acids and derivatives	Amino acids, peptides, and analogues	2746-34-1	245.114	1.12823	M-H	C10H18N2O5	0	35.4	metab_17023	neg
pos_5806	1-Acetamidocyclopentanecarboxylic acid	3.72e-05	0.0001133	1.4079	1.4078	1.2639	0.3379	yes	-	-	-	-	-	-	-	-	-	-	-	-	172.097	3.10652	M+H	C8H13NO3	58.8	0	metab_5153	pos
neg_3013	Seryltryptophan	8.61e-08	4.09e-07	1.4063	1.4075	0.7256	-0.4628	yes	-	-	-	-	-	-	-	HMDB0029050	Organic acids and derivatives	Carboxylic acids and derivatives	Amino acids, peptides, and analogues	94421-70-2	290.115	3.33663	M-H	C14H17N3O4	0	46.5	metab_10066	neg
neg_704	Glycosides	1.5e-12	6.2e-11	1.4043	1.4036	0.803	-0.3165	yes	C01443	Steroids	23-Carbon atoms	map04976	Bile secretion	Organismal Systems	Digestive system	HMDB0031448	Lipids and lipid-like molecules	Steroids and steroid derivatives	Steroid lactones	-	583.273	3.4738	M-H, M+Na-2H	C29H44O12	0	43.7	metab_14424	neg
pos_7061	N-(1-(1,2-Dihydro-1-methanesulfonylspiro(3H-indole-3,4'-piperidine-1'-yl)carbonyl)-4-phenylbutyl)-2-amino-2-methylpropanamide hydrochloride	0.0008867	0.001911	1.4042	1.4065	1.2188	0.2855	yes	-	-	-	-	-	-	-	HMDB0253840	Organic acids and derivatives	Carboxylic acids and derivatives	Amino acids, peptides, and analogues	-	491.246	1.64932	M+H-2H2O	C28H38N4O4S	0	42.6	metab_6496	pos
neg_3980	Tranexamic Acid	3.95e-12	1.36e-10	1.3998	1.3996	0.7849	-0.3493	yes	C12535	-	-	-	-	-	-	PW_C008836;HMDB0014447;MJDBOTE0000780	Organic acids and derivatives	Carboxylic acids and derivatives	Amino acids, peptides, and analogues	1197-18-8	202.108	4.67915	M+FA-H	C8H15NO2	0	55.3	metab_11116	neg
neg_6646	Isbogrel	7.52e-09	5.4e-08	1.3991	1.3976	0.7628	-0.3906	yes	-	-	-	-	-	-	-	HMDB0253595	Benzenoids	Benzene and substituted derivatives	Styrenes	-	302.118	4.78812	M+Na-2H	C18H19NO2	0	49.6	metab_13997	neg
neg_3665	3-Methylbutyl glucosinolate	2.97e-07	1.15e-06	1.3983	1.3958	0.7171	-0.4797	yes	-	-	-	-	-	-	-	HMDB0038412	Organic oxygen compounds	Organooxygen compounds	Carbohydrates and carbohydrate conjugates	76265-22-0	370.063	4.17303	M-H2O-H	C12H23NO9S2	0	45.8	metab_10777	neg
neg_8060	Monatepil	1.06e-09	1.09e-08	1.3962	1.395	0.8014	-0.3194	yes	-	-	-	-	-	-	-	HMDB0254841	Organoheterocyclic compounds	Benzothiepins	Dibenzothiepins	-	520.205	3.1601	M+FA-H	C28H30FN3OS	0	34.8	metab_15537	neg
neg_2637	Enkephalin L	1.66e-10	2.53e-09	1.3956	1.3944	0.804	-0.3147	yes	-	-	-	-	-	-	-	HMDB0001045	Organic acids and derivatives	Carboxylic acids and derivatives	Amino acids, peptides, and analogues	14-18-6	600.264	2.89488	M+FA-H	C28H37N5O7	0	74.8	metab_9649	neg
neg_4348	(S)-[8]-Gingerol	9.69e-08	4.51e-07	1.3947	1.3957	0.7386	-0.4372	yes	C17495	-	-	-	-	-	-	HMDB0033615	Benzenoids	Phenols	Methoxyphenols	23513-08-8	343.187	5.42625	M+Na-2H	C19H30O4	0	38.5	metab_11521	neg
neg_3251	Citrusin II	1.11e-08	7.48e-08	1.3873	1.3858	0.7848	-0.3495	yes	-	-	-	-	-	-	-	HMDB0303681	Organic acids and derivatives	Carboxylic acids and derivatives	Amino acids, peptides, and analogues	-	693.321	3.61042	M-H2O-H	C37H44N8O7	0	42.2	metab_10325	neg
neg_4339	Vignatic acid B	8.99e-06	2.17e-05	1.3863	1.385	1.3427	0.4251	yes	-	-	-	-	-	-	-	HMDB0033617	Organic acids and derivatives	Carboxylic acids and derivatives	Amino acids, peptides, and analogues	181485-20-1	540.267	5.4122	M+Na-2H	C27H41N3O7	0	40.6	metab_11511	neg
neg_5837	Nona-2,4-dienoylcarnitine	2.54e-11	5.83e-10	1.3857	1.3854	0.7398	-0.4349	yes	-	-	-	-	-	-	-	HMDB0241768	Lipids and lipid-like molecules	Fatty Acyls	Fatty acid esters	-	318.171	5.75605	M+Na-2H	C16H27NO4	0	31.8	metab_13122	neg
neg_1403	PA(20:5(6E,8Z,11Z,14Z,17Z)-OH(5)/18:4(6Z,9Z,12Z,15Z))	3.05e-10	3.98e-09	1.3854	1.384	0.8045	-0.3139	yes	-	-	-	-	-	-	-	HMDB0264371	Not Available	Not Available	Not Available	-	767.369	2.22815	M+Cl, M+K-2H	C41H63O9P	0	38.1	metab_8325	neg
neg_2643	Gamma-Glutamyltryptophan	1.26e-09	1.25e-08	1.3851	1.3861	0.7737	-0.3701	yes	-	-	-	-	-	-	-	HMDB0252908;HMDB0029160	Organic acids and derivatives	Carboxylic acids and derivatives	Amino acids, peptides, and analogues	66471-20-3	332.125	2.90288	M-H	C16H19N3O5	0	46	metab_9656	neg
neg_7867	Morphiceptin	1.83e-08	1.13e-07	1.383	1.3847	0.7853	-0.3487	yes	-	-	-	-	-	-	-	HMDB0005777	Organic acids and derivatives	Carboxylic acids and derivatives	Amino acids, peptides, and analogues	74135-04-9	566.259	3.34463	M+FA-H	C28H35N5O5	0	62.2	metab_15325	neg
neg_561	3-Hydroxynona-4,6-dienoylcarnitine	3.86e-10	4.8e-09	1.3741	1.3731	0.7759	-0.3661	yes	-	-	-	-	-	-	-	HMDB0241771	Lipids and lipid-like molecules	Fatty Acyls	Fatty acid esters	-	350.136	2.90288	M+Cl, M+K-2H	C16H27NO5	0	38.7	metab_12878	neg
neg_7027	Cis-and trans-Ethyl 2,4-dimethyl-1,3-dioxolane-2-acetate	1.42e-07	6.2e-07	1.374	1.3714	0.7509	-0.4134	yes	-	-	-	-	-	-	-	-	-	-	-	-	421.209	4.23705	2M+FA-H	C9H16O4	0	57.6	metab_14410	neg
neg_9744	Valylglutamic acid	6e-11	1.13e-09	1.3735	1.3727	0.7744	-0.3689	yes	-	-	-	-	-	-	-	HMDB0029126	Organic acids and derivatives	Carboxylic acids and derivatives	Amino acids, peptides, and analogues	3062-07-05	245.114	0.640783	M-H	C10H18N2O5	0	44.6	metab_17328	neg
neg_9266	3-Aminoisobutanoic Acid	7.98e-07	2.66e-06	1.3733	1.3746	1.3053	0.3844	yes	C05145	Peptides	Amino acids	-	-	-	-	PW_C001993;HMDB0003911;MJDBOTE0000609	Organic acids and derivatives	Carboxylic acids and derivatives	Amino acids, peptides, and analogues	144-90-1	102.055	1.68317	M-H	C4H9NO2	31.5	0	metab_16846	neg
neg_4039	Sobetirome	4.94e-07	1.77e-06	1.3732	1.3742	0.7476	-0.4197	yes	C15618	-	-	-	-	-	-	HMDB0258355	Benzenoids	Benzene and substituted derivatives	Diphenylmethanes	211110-63-3	365.113	4.79413	M+K-2H	C20H24O4	0	41.6	metab_11181	neg
neg_2743	S-(9-hydroxy-PGA2)-glutathione	7.79e-08	3.75e-07	1.3722	1.3722	0.7916	-0.3372	yes	-	-	-	-	-	-	-	HMDB0013060	Organic acids and derivatives	Carboxylic acids and derivatives	Amino acids, peptides, and analogues	-	624.3	3.03175	M-H2O-H	C30H49N3O10S	0	60.3	metab_9767	neg
neg_2790	2-Acetylaminofluorene	8.9e-10	9.48e-09	1.3703	1.3697	1.3008	0.3794	yes	C02778	-	-	-	-	-	-	HMDB0244967	Benzenoids	Fluorenes	Not Available	-	668.29	3.07962	3M-H	C15H13NO	0	78.9	metab_9818	neg
neg_6804	2-[[2-(4-Hydroxyphenyl)ethylamino]methyl]-3,4-dihydro-2H-naphthalen-1-one	7.69e-10	8.4e-09	1.3699	1.3686	0.7909	-0.3384	yes	-	-	-	-	-	-	-	HMDB0253061	Benzenoids	Tetralins	Not Available	-	316.133	4.5334	M+Na-2H	C19H21NO2	0	57.1	metab_14171	neg
neg_8233	Miproxifene phosphate	2.69e-10	3.67e-09	1.3679	1.3679	0.781	-0.3566	yes	-	-	-	-	-	-	-	HMDB0254746	Phenylpropanoids and polyketides	Stilbenes	Not Available	-	490.216	2.99925	M-H2O-H	C29H36NO5P	0	53.2	metab_15726	neg
neg_529	Cinncassiol D2 glucoside	2.88e-10	3.86e-09	1.3674	1.3667	0.7832	-0.3526	yes	-	-	-	-	-	-	-	HMDB0034679	Lipids and lipid-like molecules	Prenol lipids	Terpene glycosides	-	529.262	2.7419	M-H2O-H, M-H	C26H42O11	0	39.3	metab_12530	neg
neg_4075	N-lactoyl-phenylalanine	1.91e-10	2.78e-09	1.3637	1.3634	0.7927	-0.3352	yes	-	-	-	-	-	-	-	HMDB0062175	Organic acids and derivatives	Carboxylic acids and derivatives	Amino acids, peptides, and analogues	183241-73-8	236.093	4.86625	M-H	C12H15NO4	37.1	0	metab_11220	neg
neg_3444	Cyclosquamosin B	2.36e-09	2.08e-08	1.3636	1.3628	0.7894	-0.3412	yes	-	-	-	-	-	-	-	HMDB0303368	Organic acids and derivatives	Carboxylic acids and derivatives	Amino acids, peptides, and analogues	-	888.41	3.87317	M+K-2H	C39H65N9O10S	0	75	metab_10537	neg
neg_8496	3-Formyl Rifamycin	3.68e-13	1.96e-11	1.3622	1.3614	0.8168	-0.292	yes	-	-	-	-	-	-	-	HMDB0245874	Organic acids and derivatives	Carboxylic acids and derivatives	Amino acids, peptides, and analogues	-	770.296	2.69402	M+FA-H	C38H47NO13	0	37.3	metab_16013	neg
neg_121	Glutamylalanine	4.44e-07	1.62e-06	1.3617	1.3621	0.7884	-0.343	yes	-	-	-	-	-	-	-	HMDB0003764	Organic acids and derivatives	Carboxylic acids and derivatives	Amino acids, peptides, and analogues	21064-18-6	217.083	0.912367	M-H, M+Na-2H, M+K-2H	C8H14N2O5	0	52.8	metab_8111	neg
neg_3639	Ethyl 3-hydroxyoctanoate O-[glucosyl-(1->6)-glucoside]	1.3e-06	4.07e-06	1.3598	1.3562	0.7657	-0.3851	yes	-	-	-	-	-	-	-	HMDB0038738	Lipids and lipid-like molecules	Fatty Acyls	Fatty acyl glycosides	-	493.23	4.14103	M-H2O-H	C22H40O13	0	35.6	metab_10748	neg
neg_6270	Dihydrozeatin-9-N-glucoside-O-glucoside	3.45e-05	7.16e-05	1.3565	1.3567	0.7923	-0.3358	yes	-	-	-	-	-	-	-	HMDB0012212	Lipids and lipid-like molecules	Fatty Acyls	Fatty acyl glycosides	619326-04-4	580.205	5.46455	M+Cl	C22H35N5O11	0	66.4	metab_13584	neg
neg_1914	Glycylvaline	5.05e-05	0.0001003	1.3563	1.3572	0.7323	-0.4495	yes	-	-	-	-	-	-	-	HMDB0028854;MJDBOTE0000605	Organic acids and derivatives	Carboxylic acids and derivatives	Amino acids, peptides, and analogues	1963-21-9	173.092	1.47718	M-H	C7H14N2O3	75.6	0	metab_8867	neg
neg_7863	Imidaprilat	2.87e-07	1.12e-06	1.3552	1.3559	0.7675	-0.3818	yes	C21519	-	-	-	-	-	-	HMDB0041908;HMDB0244459	Organic acids and derivatives	Carboxylic acids and derivatives	Amino acids, peptides, and analogues	89371-44-8	422.157	3.35325	M+FA-H	C18H23N3O6	0	66.8	metab_15321	neg
neg_7725	PA(20:4(8Z,11Z,14Z,17Z)-2OH(5S,6R)/12:0)	1.6e-05	3.6e-05	1.3517	1.3528	0.7625	-0.3911	yes	-	-	-	-	-	-	-	HMDB0262821	Not Available	Not Available	Not Available	-	709.352	3.49782	M+K-2H	C35H61O10P	0	33.9	metab_15171	neg
neg_4092	1,2-dibutyrin	3.94e-06	1.06e-05	1.3494	1.3458	0.7626	-0.391	yes	-	-	-	-	-	-	-	HMDB0304007	Lipids and lipid-like molecules	Glycerolipids	Diradylglycerols	-	463.256	4.90652	2M-H	C11H20O5	0	48.5	metab_11239	neg
neg_6421	LysoPE(22:5(4Z,7Z,10Z,13Z,16Z)/0:0)	2.91e-07	1.13e-06	1.3486	1.3456	0.79	-0.3401	yes	-	-	-	-	-	-	-	HMDB0011524	Lipids and lipid-like molecules	Glycerophospholipids	Glycerophosphoethanolamines	-	548.273	5.23832	M+Na-2H	C27H46NO7P	0	84.5	metab_13749	neg
neg_4235	Glycyllysylarginine	5e-05	9.93e-05	1.3467	1.3457	1.3009	0.3795	yes	-	-	-	-	-	-	-	HMDB0252886	Organic acids and derivatives	Carboxylic acids and derivatives	Amino acids, peptides, and analogues	-	394.198	5.23035	M+Cl	C14H29N7O4	0	36.6	metab_11397	neg
neg_4703	Naproxen	4.77e-09	3.71e-08	1.3466	1.3465	1.2714	0.3464	yes	C01517	-	-	-	-	-	-	HMDB0001923;PW_C001282;MJDBOTE0000494	Benzenoids	Naphthalenes	Not Available	22204-53-1	505.19	5.74812	2M+FA-H	C14H14O3	0	61.3	metab_11904	neg
neg_7180	Hydroxyprolyl-Isoleucine	5.78e-12	1.79e-10	1.3464	1.3456	0.7909	-0.3384	yes	-	-	-	-	-	-	-	HMDB0028866	Organic acids and derivatives	Carboxylic acids and derivatives	Amino acids, peptides, and analogues	-	243.135	4.08502	M-H	C11H20N2O4	0	34.4	metab_14574	neg
neg_6594	(3S,5R,6S,7E,9x)-7-Megastigmene-3,6,9-triol 9-glucoside	1.52e-10	2.37e-09	1.3422	1.342	0.7732	-0.3711	yes	-	-	-	-	-	-	-	LMFA13010057;HMDB0041176	Lipids and lipid-like molecules	Fatty Acyls	Fatty acyl glycosides	-	435.224	4.8849	M+FA-H	C19H34O8	0	68.4	metab_13939	neg
neg_8579	Metoprolol	4.04e-13	2.09e-11	1.3404	1.3398	0.803	-0.3166	yes	C07202	-	-	-	-	-	-	HMDB0001932;PW_C001291;MJDBOTE0001765	Benzenoids	Phenols	Tyrosols and derivatives	37350-58-6;51384-51-1	288.156	2.60557	M+Na-2H	C15H25NO3	0	30.4	metab_16103	neg
pos_7291	2-C-Methyl-1,4-erythrono-D-lactone	1.52e-08	1.63e-07	1.3398	1.3397	0.8314	-0.2664	yes	-	-	-	-	-	-	-	HMDB0029884	Organoheterocyclic compounds	Lactones	Gamma butyrolactones	18465-71-9	150.077	0.91145	M+NH4	C5H8O4	0	42.4	metab_6737	pos
neg_8268	Dihydroergocornine	1.81e-09	1.67e-08	1.3379	1.3364	0.8075	-0.3084	yes	-	-	-	-	-	-	-	HMDB0251308	Alkaloids and derivatives	Ergoline and derivatives	Lysergic acids and derivatives	-	598.284	2.96727	M+Cl	C31H41N5O5	0	83.5	metab_15762	neg
neg_4697	MG(0:0/20:3(11Z,14Z,17Z)/0:0)	3.11e-11	6.72e-10	1.3345	1.3348	1.307	0.3863	yes	-	-	-	-	-	-	-	HMDB0011545	Lipids and lipid-like molecules	Endocannabinoids	Not Available	-	361.275	5.74015	M-H2O-H	C23H40O4	0	44.7	metab_11897	neg
neg_8179	Cycloheximide	1.51e-10	2.36e-09	1.3326	1.3315	0.8032	-0.3161	yes	C06685	Antibiotics	Others	-	-	-	-	HMDB0250657	Organoheterocyclic compounds	Piperidines	Piperidinones	66-81-9	302.136	3.05563	M+Na-2H	C15H23NO4	0	30.4	metab_15666	neg
neg_8313	Landiolol	3.69e-11	7.78e-10	1.3319	1.3313	0.8071	-0.3091	yes	-	-	-	-	-	-	-	HMDB0253969	Organoheterocyclic compounds	Oxazinanes	Morpholines	-	530.247	2.91883	M+Na-2H	C25H39N3O8	0	74	metab_15812	neg
neg_381	L-Aspartate-semialdehyde	2.24e-08	1.34e-07	1.3307	1.3324	0.7798	-0.3588	yes	C00441	-	-	map01100;map00998;map00997;map00300;map01120;map01210;map00270;map00330;map01230;map01110;map00260;map00261;map00400	Metabolic pathways;Biosynthesis of various antibiotics;Biosynthesis of various other secondary metabolites;Lysine biosynthesis;Microbial metabolism in diverse environments;2-Oxocarboxylic acid metabolism;Cysteine and methionine metabolism;Arginine and proline metabolism;Biosynthesis of amino acids;Biosynthesis of secondary metabolites;Glycine, serine and threonine metabolism;Monobactam biosynthes…	Metabolism;Metabolism;Metabolism;Metabolism;Metabolism;Metabolism;Metabolism;Metabolism;Metabolism;Metabolism;Metabolism;Metabolism;Metabolism	Global and overview maps;Biosynthesis of other secondary metabolites;Biosynthesis of other secondary metabolites;Amino acid metabolism;Global and overview maps;Global and overview maps;Amino acid metabolism;Amino acid metabolism;Global and overview maps;Global and overview maps;Amino acid metabolism;Biosynthesis of other secondary metabolites;Amino acid metabolism	HMDB0012249	Organic acids and derivatives	Carboxylic acids and derivatives	Amino acids, peptides, and analogues	2338-03-06	233.078	0.616867	2M-H, 2M+Hac-H	C4H7NO3	0	32	metab_10934	neg
neg_2288	Neurotensin 11-13	3.76e-08	2.06e-07	1.3301	1.3277	0.7948	-0.3314	yes	-	-	-	-	-	-	-	HMDB0013024	Organic acids and derivatives	Carboxylic acids and derivatives	Amino acids, peptides, and analogues	-	428.215	2.38802	M+Na-2H	C21H33N3O5	0	51.1	metab_9268	neg
neg_8045	Farnesylcysteine	1.64e-09	1.55e-08	1.3301	1.3303	0.7736	-0.3703	yes	C19691	-	-	map01110;map00900	Biosynthesis of secondary metabolites;Terpenoid backbone biosynthesis	Metabolism;Metabolism	Global and overview maps;Metabolism of terpenoids and polyketides	HMDB0011627	Lipids and lipid-like molecules	Prenol lipids	Sesquiterpenoids	68000-92-0	360.178	3.1761	M+Cl	C18H31NO2S	0	57.1	metab_15520	neg
neg_1428	Cinnzeylanine	3.36e-10	4.29e-09	1.3298	1.3284	0.8073	-0.3088	yes	-	-	-	-	-	-	-	HMDB0036011	Lipids and lipid-like molecules	Prenol lipids	Diterpenoids	62203-47-8	471.221	2.25203	M+Cl, M+FA-H	C22H34O8	0	54.6	metab_8352	neg
neg_2635	Methyl N-({(2s,3s)-3-[(Propylamino)carbonyl]oxiran-2-Yl}carbonyl)-L-Isoleucyl-L-Prolinate	0.0004334	0.0007021	1.3291	1.33	1.3667	0.4507	yes	-	-	-	-	-	-	-	HMDB0249521	Organic acids and derivatives	Carboxylic acids and derivatives	Amino acids, peptides, and analogues	-	418.194	2.89488	M+Na-2H	C19H31N3O6	0	35.3	metab_9647	neg
neg_4089	DG(20:4(5E,8Z,12Z,14Z)-OH(11R)/8:0/0:0)	7.6e-11	1.37e-09	1.3235	1.3226	0.8161	-0.2932	yes	-	-	-	-	-	-	-	HMDB0297104	Not Available	Not Available	Not Available	-	557.33	4.89695	M+K-2H	C31H52O6	0	70.4	metab_11235	neg
neg_2945	PS(20:5(5Z,8Z,11Z,14Z,17Z)/20:5(7Z,9Z,11E,13E,17Z)-3OH(5,6,15))	1.45e-05	3.29e-05	1.323	1.3241	1.2497	0.3216	yes	-	-	-	-	-	-	-	HMDB0282843	Not Available	Not Available	Not Available	-	912.407	3.24812	M+K-2H	C46H70NO13P	0	69.7	metab_9989	neg
pos_5634	Propham	0.0002701	0.0006577	1.3192	1.3217	0.8228	-0.2814	yes	C18887	-	-	-	-	-	-	-	-	-	-	122-42-9	180.102	3.5967	M+H	C10H13NO2	59.8	0	metab_4983	pos
neg_6030	Danatrol	1.85e-09	1.7e-08	1.3162	1.3152	0.7968	-0.3276	yes	C06938	-	-	-	-	-	-	HMDB0250842;HMDB0002835	Lipids and lipid-like molecules	Steroids and steroid derivatives	Estrane steroids	17230-88-5	358.18	5.63635	M+Na-2H	C22H27NO2	0	48.4	metab_13327	neg
neg_8087	Dodeca-3,6,9-trienedioylcarnitine	1.17e-07	5.26e-07	1.3162	1.3135	0.7923	-0.3358	yes	-	-	-	-	-	-	-	HMDB0241285	Lipids and lipid-like molecules	Fatty Acyls	Fatty acid esters	-	388.173	3.1361	M+Na-2H	C19H29NO6	0	44.1	metab_15566	neg
neg_7325	Benzenebutanesulfonic acid, 3-phenoxy-alpha-phosphono-, (alphaS)-	1.68e-07	7.11e-07	1.3159	1.3161	1.3009	0.3795	yes	-	-	-	-	-	-	-	HMDB0244709	Benzenoids	Benzene and substituted derivatives	Diphenylethers	-	431.059	3.91818	M+FA-H	C16H19O7PS	0	38	metab_14734	neg
neg_3978	Moroxydine	4.05e-08	2.19e-07	1.3143	1.3135	0.802	-0.3182	yes	-	-	-	-	-	-	-	HMDB0254889	Organic nitrogen compounds	Organonitrogen compounds	Guanidines	-	401.24	4.6735	2M+Hac-H	C6H13N5O	0	47.4	metab_11113	neg
neg_3021	Dioncophylline C	7.96e-09	5.68e-08	1.3121	1.3123	1.2843	0.361	yes	C12337	-	-	-	-	-	-	HMDB0251431	Organoheterocyclic compounds	Isoquinolines and derivatives	Naphthylisoquinolines	-	362.175	3.34463	M-H	C23H25NO3	0	41.3	metab_10075	neg
neg_8679	Saccharopine	4.65e-07	1.68e-06	1.3118	1.3094	0.8029	-0.3167	yes	C00449	-	-	map01100;map00310;map01110;map00300;map01230	Metabolic pathways;Lysine degradation;Biosynthesis of secondary metabolites;Lysine biosynthesis;Biosynthesis of amino acids	Metabolism;Metabolism;Metabolism;Metabolism;Metabolism	Global and overview maps;Amino acid metabolism;Global and overview maps;Amino acid metabolism;Global and overview maps	PW_C000189;HMDB0000279	Organic acids and derivatives	Carboxylic acids and derivatives	Amino acids, peptides, and analogues	997-68-2	611.279	2.46853	2M+Hac-H	C11H20N2O6	0	44.1	metab_16211	neg
neg_1616	Serylhydroxyproline	1.12e-09	1.14e-08	1.3111	1.312	0.8073	-0.3088	yes	-	-	-	-	-	-	-	HMDB0029040	Organic acids and derivatives	Carboxylic acids and derivatives	Amino acids, peptides, and analogues	90965-81-4	217.083	0.62485	M-H	C8H14N2O5	0	69.6	metab_8559	neg
neg_5685	N-Oleoyl Phenylalanine	5.76e-11	1.1e-09	1.3109	1.3108	1.2272	0.2954	yes	-	-	-	-	-	-	-	HMDB0062336;LMFA08020092	Organic acids and derivatives	Carboxylic acids and derivatives	Amino acids, peptides, and analogues	-	428.317	5.97257	M-H	C27H43NO3	62.3	0	metab_12959	neg
neg_9055	Fenoprofen	6.23e-08	3.13e-07	1.3072	1.3079	1.2629	0.3368	yes	C06997	-	-	-	-	-	-	HMDB0014713;PW_C009066	Benzenoids	Benzene and substituted derivatives	Diphenylethers	34597-40-5;31879-05-7	483.185	1.88347	2M-H	C15H14O3	0	53.8	metab_16623	neg
neg_574	2-Hydroxypentanoic Acid	2.54e-09	2.22e-08	1.3022	1.3023	0.8279	-0.2724	yes	-	-	-	-	-	-	-	HMDB0001863	Lipids and lipid-like molecules	Fatty Acyls	Fatty acids and conjugates	617-31-2	117.055	2.97525	M-H, M+FA-H	C5H10O3	56	0	metab_13020	neg
neg_7931	Pimozide	1.74e-08	1.08e-07	1.3008	1.3009	1.2414	0.3119	yes	C07566	-	-	-	-	-	-	HMDB0015232	Benzenoids	Benzene and substituted derivatives	Diphenylmethanes	2062-78-4	506.225	3.28068	M+FA-H	C28H29F2N3O	0	49.5	metab_15394	neg
neg_7190	Ala Leu Gly Ile Ser	2.22e-06	6.44e-06	1.2987	1.295	0.7889	-0.342	yes	-	-	-	-	-	-	-	-	-	-	-	-	458.262	4.06903	M-H	C20H37N5O7	32.4	0	metab_14585	neg
neg_6298	7-(4-Hydroxyphenyl)-1-phenyl-4-hepten-3-one	8.95e-06	2.16e-05	1.2976	1.2986	1.2824	0.3589	yes	-	-	-	-	-	-	-	HMDB0033295	Phenylpropanoids and polyketides	Diarylheptanoids	Linear diarylheptanoids	100667-52-5	605.294	5.4309	2M+FA-H	C19H20O2	0	81.5	metab_13614	neg
neg_9132	2-Hydroxybutyric Acid	8.3e-09	5.87e-08	1.2945	1.2937	0.8316	-0.266	yes	C05984	-	-	map00640	Propanoate metabolism	Metabolism	Carbohydrate metabolism	HMDB0000008;PW_C000004	Organic acids and derivatives	Hydroxy acids and derivatives	Alpha hydroxy acids and derivatives	3347-90-8;600-15-7	103.039	1.88347	M-H	C4H8O3	61.4	0	metab_16705	neg
neg_6915	PC(2:0/20:5(7Z,9Z,11E,13E,17Z)-3OH(5,6,15))	3.83e-06	1.03e-05	1.2922	1.2925	0.7843	-0.3506	yes	-	-	-	-	-	-	-	HMDB0288872	Not Available	Not Available	Not Available	-	630.299	4.37305	M-H	C30H50NO11P	0	61.1	metab_14292	neg
neg_964	16-feruloyloxypalmitate	1.62e-07	6.9e-07	1.2921	1.2894	0.8059	-0.3114	yes	C18217	-	-	map00073	Cutin, suberine and wax biosynthesis	Metabolism	Lipid metabolism	HMDB0304027	Phenylpropanoids and polyketides	Cinnamic acids and derivatives	Hydroxycinnamic acids and derivatives	-	484.223	4.69512	M+K-2H, M+FA-H	C26H39O6-	0	33.4	metab_17221	neg
neg_1009	Aceglutamide	6.9e-11	1.27e-09	1.291	1.2913	0.7968	-0.3277	yes	-	-	-	-	-	-	-	HMDB0006029;MJDBOTE0000339	Organic acids and derivatives	Carboxylic acids and derivatives	Amino acids, peptides, and analogues	2490-97-3	169.061	1.70713	M-H2O-H, M-H	C7H12N2O4	41.4	0	metab_7619	neg
neg_2526	Isoleucyl-Valine	2.81e-10	3.79e-09	1.29	1.2898	0.8023	-0.3178	yes	-	-	-	-	-	-	-	HMDB0028920	Organic acids and derivatives	Carboxylic acids and derivatives	Amino acids, peptides, and analogues	-	229.155	2.7419	M-H	C11H22N2O3	0	43.7	metab_9528	neg
neg_4254	Coenzyme B	2.28e-08	1.36e-07	1.2895	1.2881	0.8177	-0.2903	yes	C04628	Vitamins and cofactors	Cofactors	map00680;map01100;map01200;map01120;map01240	Methane metabolism;Metabolic pathways;Carbon metabolism;Microbial metabolism in diverse environments;Biosynthesis of cofactors	Metabolism;Metabolism;Metabolism;Metabolism;Metabolism	Energy metabolism;Global and overview maps;Global and overview maps;Global and overview maps;Global and overview maps	HMDB0304798	Organic acids and derivatives	Carboxylic acids and derivatives	Amino acids, peptides, and analogues	104302-77-4	342.076	5.26132	M-H	C11H22NO7PS	0	31.4	metab_11418	neg
neg_2267	Tyrosyl-Asparagine	1e-05	2.38e-05	1.2882	1.2889	0.7688	-0.3794	yes	-	-	-	-	-	-	-	HMDB0029100	Organic acids and derivatives	Carboxylic acids and derivatives	Amino acids, peptides, and analogues	-	276.099	2.34802	M-H2O-H	C13H17N3O5	0	47.8	metab_9246	neg
pos_4421	(9Z,12R)-12-Hydroxyoctadec-9-enoic acid	8.31e-05	0.0002298	1.2868	1.2873	1.2004	0.2635	yes	C08365	-	-	-	-	-	-	HMDB0034297	Lipids and lipid-like molecules	Fatty Acyls	Fatty acids and conjugates	141-22-0	281.247	5.95162	M+H-H2O	C18H34O3	46.9	0	metab_3693	pos
neg_7791	N-(furan-2-ylmethyl)-1H-pyrazolo[3,4-d]pyrimidin-4-amine	8.25e-09	5.85e-08	1.2861	1.285	0.7615	-0.3931	yes	-	-	-	-	-	-	-	-	-	-	-	-	214.073	3.43382	M-H	C10H9N5O	52.4	0	metab_15241	neg
neg_1064	Leucyl-Threonine	4.16e-11	8.55e-10	1.2775	1.2769	0.7963	-0.3286	yes	-	-	-	-	-	-	-	HMDB0028939	Organic acids and derivatives	Carboxylic acids and derivatives	Amino acids, peptides, and analogues	-	213.124	1.85948	M-H2O-H, M-H	C10H20N2O4	0	30.7	metab_7951	neg
neg_6476	Hydroxyprolyl-Valine	2.14e-09	1.92e-08	1.2773	1.2766	0.8071	-0.3092	yes	-	-	-	-	-	-	-	HMDB0028876	Organic acids and derivatives	Carboxylic acids and derivatives	Amino acids, peptides, and analogues	-	211.108	5.15115	M-H2O-H	C10H18N2O4	0	43.6	metab_13809	neg
neg_942	4-Vinylphenol	1.4e-10	2.24e-09	1.2769	1.2771	0.8059	-0.3114	yes	C05627	-	-	map01110;map00940	Biosynthesis of secondary metabolites;Phenylpropanoid biosynthesis	Metabolism;Metabolism	Global and overview maps;Biosynthesis of other secondary metabolites	HMDB0004072	Benzenoids	Benzene and substituted derivatives	Styrenes	2628-17-3	119.049	4.5334	M-H, M-H2O-H	C8H8O	39.7	0	metab_17005	neg
neg_8955	3-Amino-3-(4-hydroxyphenyl)propanoic Acid	1.34e-09	1.32e-08	1.2766	1.2766	0.7951	-0.3308	yes	C04368	-	-	map00350	Tyrosine metabolism	Metabolism	Amino acid metabolism	HMDB0003831	Organic acids and derivatives	Carboxylic acids and derivatives	Amino acids, peptides, and analogues	-	180.066	2.09185	M-H	C9H11NO3	52	0	metab_16516	neg
neg_1873	Deltaline	3.45e-06	9.43e-06	1.2719	1.2699	0.8031	-0.3164	yes	C08679	-	-	-	-	-	-	HMDB0250984	Lipids and lipid-like molecules	Prenol lipids	Diterpenoids	6836-11-09	542.258	1.25573	M+Cl	C27H41NO8	0	54.9	metab_8826	neg
neg_4129	Propenoylcarnitine	3.02e-07	1.16e-06	1.2705	1.2715	0.7626	-0.3911	yes	-	-	-	-	-	-	-	HMDB0013124;LMFA07070104	Lipids and lipid-like molecules	Fatty Acyls	Fatty acid esters	-	214.108	5.01013	M-H	C10H17NO4	0	30.7	metab_11280	neg
pos_4767	2-Pentyl-3-phenyl-2-propenal	0.00397	0.007422	1.2694	1.2711	0.8176	-0.2906	yes	C12288	-	-	-	-	-	-	HMDB0031313	Phenylpropanoids and polyketides	Cinnamaldehydes	Not Available	122-40-7	443.233	5.64492	2M+K	C14H18O	0	56.4	metab_4070	pos
neg_2228	Undeca-3,6,9-trienedioylcarnitine	3.05e-09	2.6e-08	1.2693	1.2679	0.8287	-0.2711	yes	-	-	-	-	-	-	-	HMDB0241205	Lipids and lipid-like molecules	Fatty Acyls	Fatty acid esters	-	374.157	2.3	M+Na-2H	C18H27NO6	0	45.6	metab_9203	neg
neg_3035	Leucyl-leucine	6.77e-10	7.57e-09	1.269	1.2689	0.8054	-0.3122	yes	C11332	-	-	-	-	-	-	HMDB0254039;HMDB0028933	Organic acids and derivatives	Carboxylic acids and derivatives	Amino acids, peptides, and analogues	3303-31-9;2883-36-5	243.171	3.3692	M-H	C12H24N2O3	0	35.3	metab_10090	neg
neg_3004	Tyr Thr Ala Glu	2.45e-05	5.27e-05	1.2686	1.2681	0.7677	-0.3815	yes	-	-	-	-	-	-	-	-	-	-	-	-	481.194	3.32863	M-H	C21H30N4O9	56.5	0	metab_10056	neg
neg_2824	N-Succinyl-L,L-2,6-diaminopimelate	2.48e-08	1.46e-07	1.2656	1.2656	1.2814	0.3577	yes	C04421	-	-	map01100;map01230;map00300;map01120	Metabolic pathways;Biosynthesis of amino acids;Lysine biosynthesis;Microbial metabolism in diverse environments	Metabolism;Metabolism;Metabolism;Metabolism	Global and overview maps;Global and overview maps;Amino acid metabolism;Global and overview maps	HMDB0012267	Organic acids and derivatives	Carboxylic acids and derivatives	Amino acids, peptides, and analogues	26605-36-7	271.095	3.12012	M-H2O-H	C11H18N2O7	0	38.1	metab_9856	neg
neg_8745	1-Methylguanosine	1.59e-09	1.52e-08	1.2645	1.2639	0.7946	-0.3317	yes	C04545	-	-	-	-	-	-	HMDB0001563	Nucleosides, nucleotides, and analogues	Purine nucleosides	Not Available	2140-65-0	296.1	2.38802	M-H	C11H15N5O5	35.8	0	metab_16285	neg
neg_3215	4-Hydroxyphenylacetic Acid	4.09e-12	1.39e-10	1.264	1.264	1.2515	0.3237	yes	C00642	-	-	map01100;map01220;map00360;map01120;map00350	Metabolic pathways;Degradation of aromatic compounds;Phenylalanine metabolism;Microbial metabolism in diverse environments;Tyrosine metabolism	Metabolism;Metabolism;Metabolism;Metabolism;Metabolism	Global and overview maps;Global and overview maps;Amino acid metabolism;Global and overview maps;Amino acid metabolism	HMDB0000020;HMDB0060390;MJDBOTE0000455	Benzenoids	Phenols	1-hydroxy-2-unsubstituted benzenoids	156-38-7	151.039	3.58582	M-H	C8H8O3	44.5	0	metab_17597	neg
neg_6453	Thiencynonate	1.45e-10	2.29e-09	1.2618	1.2606	0.8018	-0.3187	yes	-	-	-	-	-	-	-	HMDB0258983	Organoheterocyclic compounds	Piperidines	Not Available	-	344.172	5.20792	M-H2O-H	C20H29NO3S	0	31.8	metab_13784	neg
neg_370	Glycyl-Glutamate	8.57e-06	2.08e-05	1.2587	1.2567	0.7626	-0.391	yes	-	-	-	-	-	-	-	HMDB0028840	Organic acids and derivatives	Carboxylic acids and derivatives	Amino acids, peptides, and analogues	-	225.049	0.608917	M+Na-2H, M+K-2H	C7H12N2O5	0	33.4	metab_10815	neg
neg_5666	PE(18:1(9Z)/0:0)	0.0001839	0.0003216	1.2569	1.2569	0.8205	-0.2855	yes	-	-	-	-	-	-	-	LMGP02050004	-	-	-	-	478.294	6.01507	M-H	C23H46NO7P	85.7	0	metab_12939	neg
neg_3718	S-Formylglutathione	1.62e-10	2.48e-09	1.2534	1.2528	0.7815	-0.3557	yes	C01031	-	-	map00680;map01100;map01120	Methane metabolism;Metabolic pathways;Microbial metabolism in diverse environments	Metabolism;Metabolism;Metabolism	Energy metabolism;Global and overview maps;Global and overview maps	HMDB0001550	Organic acids and derivatives	Carboxylic acids and derivatives	Amino acids, peptides, and analogues	50409-81-9	316.061	4.24505	M-H2O-H	C11H17N3O7S	0	42.4	metab_10834	neg
neg_8907	Cytosine deoxyribonucleoside	6.47e-07	2.22e-06	1.2504	1.2503	1.2521	0.3244	yes	C00881	Nucleic acids	Nucleosides	map00240;map01100;map02010;map01232	Pyrimidine metabolism;Metabolic pathways;ABC transporters;Nucleotide metabolism	Metabolism;Metabolism;Environmental Information Processing;Metabolism	Nucleotide metabolism;Global and overview maps;Membrane transport;Global and overview maps	HMDB0000014;HMDB0250725	Nucleosides, nucleotides, and analogues	Pyrimidine nucleosides	Pyrimidine 2''-deoxyribonucleosides	951-77-9	453.174	2.23612	2M-H	C9H13N3O4	0	32.4	metab_16464	neg
neg_7682	(6S)-Tetrahydro-L-biopterin	1.56e-07	6.69e-07	1.2448	1.2441	1.2486	0.3204	yes	-	-	-	-	-	-	-	HMDB0257928	Organoheterocyclic compounds	Pteridines and derivatives	Pterins and derivatives	-	481.23	3.54583	2M-H	C9H15N5O3	0	61.4	metab_15124	neg
neg_7655	4-Butyl-5-hydroxy-1,2-diphenylpyrazol-3-one	7.54e-08	3.66e-07	1.2425	1.2404	0.8053	-0.3124	yes	-	-	-	-	-	-	-	HMDB0247793	Organoheterocyclic compounds	Azoles	Pyrazoles	-	615.3	3.56983	2M-H	C19H20N2O2	0	51.8	metab_15094	neg
neg_6472	Cholic acid glucuronide	9.2e-10	9.72e-09	1.2418	1.2426	1.2029	0.2665	yes	-	-	-	-	-	-	-	HMDB0002577;LMST05010044	Lipids and lipid-like molecules	Steroids and steroid derivatives	Steroidal glycosides	76060-22-5	621.27	5.15915	M+K-2H	C30H48O11	0	47.5	metab_13805	neg
neg_9844	Glu-Gln	2.11e-10	3e-09	1.2396	1.2393	0.8204	-0.2856	yes	-	-	-	-	-	-	-	HMDB0028817	Organic acids and derivatives	Carboxylic acids and derivatives	Amino acids, peptides, and analogues	26848-14-6	274.104	0.62485	M-H	C10H17N3O6	49.2	0	metab_17432	neg
neg_4040	Agavoside A	3.74e-09	3.07e-08	1.2378	1.2376	1.2146	0.2805	yes	C08885	-	-	-	-	-	-	HMDB0034391;LMST01080006	Lipids and lipid-like molecules	Steroids and steroid derivatives	Steroidal glycosides	56857-65-9	629.315	4.79413	M+K-2H	C33H52O9	0	83.1	metab_11183	neg
neg_8518	Histidylprolineamide	2.8e-06	7.87e-06	1.2348	1.2359	0.7688	-0.3792	yes	-	-	-	-	-	-	-	HMDB0253186	Organic acids and derivatives	Carboxylic acids and derivatives	Amino acids, peptides, and analogues	-	501.268	2.6694	2M-H	C11H17N5O2	0	35.3	metab_16038	neg
neg_8276	Cortolone-3-glucuronide	1.66e-10	2.52e-09	1.2341	1.2329	0.8199	-0.2865	yes	-	-	-	-	-	-	-	HMDB0010320	Lipids and lipid-like molecules	Steroids and steroid derivatives	Steroidal glycosides	56162-46-0	541.263	2.95932	M-H	C27H42O11	0	70.8	metab_15771	neg
neg_2786	S-Farnesyl cysteine	2.62e-06	7.41e-06	1.2329	1.2296	0.7937	-0.3333	yes	C19691	-	-	map01110;map00900	Biosynthesis of secondary metabolites;Terpenoid backbone biosynthesis	Metabolism;Metabolism	Global and overview maps;Metabolism of terpenoids and polyketides	HMDB0257400;HMDB0011627	Lipids and lipid-like molecules	Prenol lipids	Sesquiterpenoids	68000-92-0	360.178	3.07962	M+Cl	C18H31NO2S	0	52.9	metab_9813	neg
neg_2667	Vindoline	4.34e-05	8.76e-05	1.2297	1.2284	0.7706	-0.3759	yes	C01626	-	-	map01110;map01063;map00901	Biosynthesis of secondary metabolites;Biosynthesis of alkaloids derived from shikimate pathway;Indole alkaloid biosynthesis	Metabolism;Metabolism;Metabolism	Global and overview maps;Chemical structure transformation maps;Biosynthesis of other secondary metabolites	HMDB0259814;MJDBOTE0000982	Alkaloids and derivatives	Plumeran-type alkaloids	Not Available	2182-14-1	437.204	2.9354	M-H2O-H	C25H32N2O6	0	53.7	metab_9682	neg
neg_6211	Isoketocamphoric acid	6e-06	1.53e-05	1.2276	1.2276	0.7808	-0.357	yes	-	-	-	-	-	-	-	HMDB0301824	Lipids and lipid-like molecules	Fatty Acyls	Fatty acids and conjugates	-	215.092	5.524	M-H	C10H16O5	0	35.3	metab_13520	neg
neg_2748	Gly-pro-arg-pro	1.98e-11	4.83e-10	1.2226	1.2227	0.8283	-0.2718	yes	-	-	-	-	-	-	-	HMDB0252829	Organic acids and derivatives	Carboxylic acids and derivatives	Amino acids, peptides, and analogues	-	460.204	3.03972	M+Cl	C18H31N7O5	0	75.4	metab_9772	neg
neg_3399	Fructosyl-lysine	1.2e-06	3.79e-06	1.2213	1.2208	1.2686	0.3432	yes	C16488	-	-	map02060	Phosphotransferase system (PTS)	Environmental Information Processing	Membrane transport	HMDB0252495;HMDB0242138;HMDB0034879	Organic acids and derivatives	Carboxylic acids and derivatives	Amino acids, peptides, and analogues	21291-40-7	289.14	3.817	M-H2O-H	C12H24N2O7	0	55.5	metab_10486	neg
neg_1903	8-Hydroxyguanine	4.18e-07	1.54e-06	1.2199	1.2197	1.249	0.3208	yes	C20155	-	-	-	-	-	-	HMDB0002032	Organoheterocyclic compounds	Imidazopyrimidines	Purines and purine derivatives	5614-64-2	166.036	1.41392	M-H	C5H5N5O2	0	39.7	metab_8856	neg
neg_7886	Sulfolithocholylglycine	5.85e-07	2.05e-06	1.2119	1.2131	1.2313	0.3001	yes	C11301	-	-	-	-	-	-	HMDB0002639;HMDB0000698;HMDB0062801	Lipids and lipid-like molecules	Steroids and steroid derivatives	Bile acids, alcohols and derivatives	15324-64-8;474-74-8	494.262	3.32863	M-H2O-H	C26H43NO7S	0	52.8	metab_17616	neg
neg_9931	Citrulline	1.14e-09	1.16e-08	1.2118	1.212	0.8159	-0.2936	yes	C00327	Peptides	Amino acids	map01100;map00220;map01110;map01230	Metabolic pathways;Arginine biosynthesis;Biosynthesis of secondary metabolites;Biosynthesis of amino acids	Metabolism;Metabolism;Metabolism;Metabolism	Global and overview maps;Amino acid metabolism;Global and overview maps;Global and overview maps	HMDB0000904;PW_C000723;MJDBOTE0000481	Organic acids and derivatives	Carboxylic acids and derivatives	Amino acids, peptides, and analogues	372-75-8	174.088	0.576333	M-H	C6H13N3O3	89	0	metab_17526	neg
neg_7191	Glu-val-phe	6.86e-05	0.0001321	1.2116	1.2108	0.8055	-0.312	yes	-	-	-	-	-	-	-	-	-	-	-	-	392.182	4.06903	M-H	C19H27N3O6	70.1	0	metab_14586	neg
neg_9739	N-Acetyl-a-neuraminic acid	3.99e-09	3.23e-08	1.2099	1.2098	0.8247	-0.278	yes	C19909	-	-	-	-	-	-	HMDB0000773	Organic oxygen compounds	Organooxygen compounds	Carbohydrates and carbohydrate conjugates	21646-00-4	290.088	0.640783	M-H2O-H	C11H19NO9	0	45.8	metab_17322	neg
neg_2583	Leu-Gly-Gly	1.37e-08	8.96e-08	1.2078	1.208	0.8292	-0.2702	yes	-	-	-	-	-	-	-	-	-	-	-	-	244.13	2.83038	M-H	C10H19N3O4	53.9	0	metab_9590	neg
neg_7633	5-Hydroxy-1-methylpyrrolidin-2-one	0.0005332	0.0008477	1.2045	1.2058	0.8019	-0.3185	yes	-	-	-	-	-	-	-	HMDB0246801	Organoheterocyclic compounds	Pyrrolidines	N-alkylpyrrolidines	-	344.183	3.58582	3M-H	C5H9NO2	0	48.5	metab_15071	neg
neg_7575	(+/-)-Pelletierine	1.42e-11	3.73e-10	1.1989	1.1992	1.2225	0.2899	yes	C06182	-	-	map01100;map00960;map01064;map01110	Metabolic pathways;Tropane, piperidine and pyridine alkaloid biosynthesis;Biosynthesis of alkaloids derived from ornithine, lysine and nicotinic acid;Biosynthesis of secondary metabolites	Metabolism;Metabolism;Metabolism;Metabolism	Global and overview maps;Biosynthesis of other secondary metabolites;Chemical structure transformation maps;Global and overview maps	HMDB0030325	Organoheterocyclic compounds	Piperidines	Not Available	539-00-4	186.113	3.64232	M+FA-H	C8H15NO	0	52.2	metab_15008	neg
neg_7693	8-Oxononanoylcarnitine	1.17e-09	1.18e-08	1.1969	1.1972	1.2083	0.273	yes	-	-	-	-	-	-	-	HMDB0241786	Lipids and lipid-like molecules	Fatty Acyls	Fatty acid esters	-	352.151	3.5378	M+K-2H	C16H29NO5	0	44.6	metab_15135	neg
neg_3157	2,8-Quinolinediol	2.77e-09	2.4e-08	1.1951	1.1954	1.2466	0.318	yes	C06342	-	-	-	-	-	-	HMDB0240311	Organoheterocyclic compounds	Quinolines and derivatives	Quinolones and derivatives	15450-76-7	206.045	3.52178	M+FA-H	C9H7NO2	0	60.1	metab_10223	neg
neg_8800	MURABUTIDE	7.84e-06	1.92e-05	1.1936	1.1943	1.2102	0.2753	yes	-	-	-	-	-	-	-	HMDB0254948	Organic acids and derivatives	Carboxylic acids and derivatives	Amino acids, peptides, and analogues	-	583.237	2.308	M+Cl	C23H40N4O11	0	37.7	metab_16347	neg
neg_707	Glabrin A	3.84e-08	2.09e-07	1.192	1.1927	0.8135	-0.2977	yes	-	-	-	-	-	-	-	HMDB0301777	Organic acids and derivatives	Carboxylic acids and derivatives	Amino acids, peptides, and analogues	162157-00-8	174.077	0.62485	M-H, M+K-2H	C7H13NO4	0	33.3	metab_14455	neg
neg_9459	Deoxyadenosine	0.0001011	0.000187	1.1891	1.1882	1.2346	0.304	yes	C00212	Nucleic acids	Nucleosides	map01100;map05012;map00230;map02010;map01232;map04270;map04024;map04080;map04923;map04924;map04022;map05034;map04071;map05032	Metabolic pathways;Parkinson disease;Purine metabolism;ABC transporters;Nucleotide metabolism;Vascular smooth muscle contraction;cAMP signaling pathway;Neuroactive ligand-receptor interaction;Regulation of lipolysis in adipocytes;Renin secretion;cGMP-PKG signaling pathway;Alcoholism;Sphingolipid signaling pathway;Morphine addiction	Metabolism;Human Diseases;Metabolism;Environmental Information Processing;Metabolism;Organismal Systems;Environmental Information Processing;Environmental Information Processing;Organismal Systems;Organismal Systems;Environmental Information Processing;Human Diseases;Environmental Information Processing;Human Diseases	Global and overview maps;Neurodegenerative disease;Nucleotide metabolism;Membrane transport;Global and overview maps;Circulatory system;Signal transduction;Signaling molecules and interaction;Endocrine system;Endocrine system;Signal transduction;Substance dependence;Signal transduction;Substance dependence	HMDB0000101;HMDB0000050;PW_C000068;MJDBOTE0000701	Nucleosides, nucleotides, and analogues	Purine nucleosides	Purine 2''-deoxyribonucleosides	58-61-7;958-09-8	286.071	1.05618	M+Cl	C10H13N5O3	75.3	0	metab_17604	neg
neg_8634	(R)-3-((2-(2-(4-Methylpiperidin-1-yl)ethyl)pyrrolidin-1-yl)sulfonyl)phenol	1.24e-05	2.88e-05	1.1884	1.1876	0.8193	-0.2875	yes	-	-	-	-	-	-	-	HMDB0245575	Benzenoids	Benzene and substituted derivatives	Benzenesulfonamides	-	749.359	2.52505	2M+FA-H	C18H28N2O3S	0	63.5	metab_16162	neg
neg_4567	Calcitroic acid	2.97e-06	8.28e-06	1.1874	1.1874	1.2198	0.2867	yes	C18230	-	-	-	-	-	-	HMDB0006472	Lipids and lipid-like molecules	Steroids and steroid derivatives	Vitamin D and derivatives	71204-89-2	419.244	5.63635	M+FA-H	C23H34O4	0	69.5	metab_11759	neg
neg_7784	(3xi,6xi)-Cyclo(alanylvalyl)	4.83e-07	1.73e-06	1.1866	1.1872	0.7865	-0.3465	yes	-	-	-	-	-	-	-	HMDB0033926	Organic acids and derivatives	Carboxylic acids and derivatives	Amino acids, peptides, and analogues	-	215.103	3.44182	M+FA-H	C8H14N2O2	0	32.1	metab_15233	neg
neg_2342	Dihydrophaseic acid	4.06e-08	2.19e-07	1.185	1.1855	0.8262	-0.2755	yes	C15971	-	-	map00906	Carotenoid biosynthesis	Metabolism	Metabolism of terpenoids and polyketides	HMDB0038660;LMPR0103050005	Lipids and lipid-like molecules	Prenol lipids	Sesquiterpenoids	41756-77-8	563.283	2.46853	2M-H	C15H22O5	0	54.6	metab_9328	neg
neg_7485	Threoninyl-Tryptophan	0.0003689	0.0006057	1.1832	1.1824	1.2779	0.3538	yes	-	-	-	-	-	-	-	HMDB0029072;HMDB0304790	Organic acids and derivatives	Carboxylic acids and derivatives	Amino acids, peptides, and analogues	186761-42-2	304.13	3.745	M-H	C15H19N3O4	0	31.9	metab_14909	neg
neg_8548	Fe(II)-nicotianamine	1.45e-12	6.07e-11	1.1819	1.1812	0.8239	-0.2794	yes	-	-	-	-	-	-	-	HMDB0304350	Organic acids and derivatives	Carboxylic acids and derivatives	Amino acids, peptides, and analogues	-	302.136	2.6375	M-H	C12H21N3O6	0	37.3	metab_16070	neg
neg_7907	Pheophorbide a	8.43e-07	2.78e-06	1.1816	1.1812	0.8239	-0.2795	yes	C18021	-	-	map01110;map00860	Biosynthesis of secondary metabolites;Porphyrin metabolism	Metabolism;Metabolism	Global and overview maps;Metabolism of cofactors and vitamins	HMDB0256449	Not Available	Not Available	Not Available	15664-29-6	591.263	3.30462	M-H	C35H36N4O5	0	46.1	metab_15368	neg
neg_8429	(2S)-2-Amino-6-[(3-formylpiperidin-1-yl)amino]hexanoic acid	1.26e-09	1.25e-08	1.1692	1.1684	0.8238	-0.2796	yes	-	-	-	-	-	-	-	HMDB0255325	Organic acids and derivatives	Carboxylic acids and derivatives	Amino acids, peptides, and analogues	-	256.167	2.79842	M-H	C12H23N3O3	0	63.7	metab_15940	neg
neg_9204	3-Deoxyguanosine	8e-07	2.66e-06	1.1685	1.169	1.247	0.3184	yes	-	-	-	-	-	-	-	-	-	-	-	-	266.089	1.82747	M-H	C10H13N5O4	67	0	metab_16783	neg
neg_3467	Oxethazaine	1.27e-06	3.97e-06	1.1633	1.1606	0.8311	-0.2668	yes	C12552	-	-	-	-	-	-	HMDB0031171;HMDB0255980	Lipids and lipid-like molecules	Fatty Acyls	Fatty alcohols	183195-99-5;126-27-2	502.288	3.90218	M+Cl	C28H41N3O3	0	38.7	metab_10562	neg
neg_2405	Threonylcysteine	6.08e-09	4.53e-08	1.1525	1.1513	0.8231	-0.2809	yes	-	-	-	-	-	-	-	HMDB0029058	Organic acids and derivatives	Carboxylic acids and derivatives	Amino acids, peptides, and analogues	186761-52-4	203.049	2.57288	M-H2O-H	C7H14N2O4S	0	32.7	metab_9398	neg
neg_7241	Small bacteriocin	1.51e-09	1.45e-08	1.1433	1.1423	0.8269	-0.2741	yes	-	-	-	-	-	-	-	HMDB0033503	Organic acids and derivatives	Carboxylic acids and derivatives	Amino acids, peptides, and analogues	172617-17-3	362.175	4.01303	M+K-2H	C18H31NO4	0	54.9	metab_14642	neg
neg_9977	Beta-Alanyl-L-lysine	5.28e-07	1.87e-06	1.1411	1.1425	0.8116	-0.3012	yes	C05341	-	-	map01100;map00410	Metabolic pathways;beta-Alanine metabolism	Metabolism;Metabolism	Global and overview maps;Metabolism of other amino acids	HMDB0060442	Organic acids and derivatives	Peptidomimetics	Hybrid peptides	-	216.135	0.552333	M-H	C9H19N3O3	0	37.5	metab_17572	neg
neg_2841	N-Allylglycine	7.36e-07	2.48e-06	1.1402	1.141	0.8262	-0.2754	yes	-	-	-	-	-	-	-	HMDB0255080	Organic acids and derivatives	Carboxylic acids and derivatives	Amino acids, peptides, and analogues	-	344.183	3.1441	3M-H	C5H9NO2	0	42.8	metab_9875	neg
neg_4193	26-Deoxyactein	4.17e-05	8.45e-05	1.1398	1.1418	1.211	0.2762	yes	-	-	-	-	-	-	-	HMDB0245709	Lipids and lipid-like molecules	Steroids and steroid derivatives	Cycloartanols and derivatives	-	705.383	5.15115	M+FA-H	C37H56O10	0	39	metab_11350	neg
neg_3326	Glutathione peroxide	4.26e-08	2.26e-07	1.1341	1.1349	1.2015	0.2648	yes	-	-	-	-	-	-	-	HMDB0252820	Organic acids and derivatives	Carboxylic acids and derivatives	Amino acids, peptides, and analogues	-	372.025	3.713	M+Cl	C10H15N3O8S	0	39.5	metab_10406	neg
neg_3186	Trandolaprilat	7.31e-08	3.56e-07	1.1325	1.1309	0.8292	-0.2702	yes	C21515	-	-	-	-	-	-	PW_C040469;HMDB0060583;HMDB0247506	Organic acids and derivatives	Carboxylic acids and derivatives	Amino acids, peptides, and analogues	-	401.204	3.55382	M-H	C22H30N2O5	0	53.1	metab_10255	neg
neg_7574	Dehydroxymethylepoxyquinomicin	3.99e-07	1.48e-06	1.1287	1.1294	1.228	0.2964	yes	-	-	-	-	-	-	-	HMDB0251110	Benzenoids	Benzene and substituted derivatives	Benzoic acids and derivatives	-	242.047	3.64232	M-H2O-H	C13H11NO5	0	34.4	metab_15007	neg
neg_3489	Alpha-Hydroxy-N-desmethyltamoxifen	0.001483	0.002199	1.1013	1.0972	0.8047	-0.3135	yes	C16549	-	-	map00982	Drug metabolism - cytochrome P450	Metabolism	Xenobiotics biodegradation and metabolism	HMDB0060668	Phenylpropanoids and polyketides	Stilbenes	Not Available	-	408.177	3.93317	M+Cl	C25H27NO2	0	45.8	metab_10585	neg
neg_1744	Gamma-Glutamylglutamic acid	3.08e-09	2.62e-08	1.0846	1.0839	0.8319	-0.2656	yes	C05282	-	-	-	-	-	-	HMDB0011737	Organic acids and derivatives	Carboxylic acids and derivatives	Amino acids, peptides, and analogues	1116-22-9	275.088	0.888367	M-H	C10H16N2O7	0	37.4	metab_8693	neg
