# Supplementary material for: The microbiome- and metabolome-modulating activity of dietary cholesterol: insights from the small and large intestines
Source: Royal Society of Chemistry journal article supplement (doi:10.1039/d4fo03049d), 2025-01-01
Supplement: d4fo03049d6.xlsx [file d4fo03049d6.xlsx]

## Sheet: Sheet1
Table S6. Metabolites Significantly Altered in iLI_0 and iLI_02 Groups Based on Metabolomics
ID	Metabolite	Metab ID	Significant	KEGG Compound ID	Mode	CAS ID	M/Z	Retention time	Adducts	Formula	Fragmentation Score	Theoretical Fragmentation Score	Library ID	KEGG Compound First Category	KEGG Compound Second Category	KEGG Pathway ID	KEGG Pathway First Category	KEGG Pathway Second Category	HMDB Superclass	HMDB Class	HMDB Subclass	Fragmentation Score	Theoretical Fragmentation Score	KEGG Pathway Description	KEGG Pathway Description	VIP_pred_OPLS-DA	VIP_PLS-DA	P_value	FDR	iLI_0_1	iLI_0_2	iLI_0_3	iLI_0_4	iLI_0_5	iLI_02_1	iLI_02_2	iLI_02_3	iLI_02_4	iLI_02_5
pos_3634	7-dehydrocholesterol	metab_7703	yes	C01164	pos	67-97-0;434-16-2	385.346	6.76657	M+H	C27H44O	45	0	HMDB0000876;PW_C000022;HMDB0000032;LMST01010069	Steroids	27-Carbon atoms	map01100;map01110;map00981;map00100	Metabolism;Metabolism;Metabolism;Metabolism	Global and overview maps;Global and overview maps;Metabolism of terpenoids and polyketides;Lipid metabolism	Lipids and lipid-like molecules	Steroids and steroid derivatives	Vitamin D and derivatives	45	0	Metabolic pathways;Biosynthesis of secondary metabolites;Insect hormone biosynthesis;Steroid biosynthesis	Metabolic pathways;Biosynthesis of secondary metabolites;Insect hormone biosynthesis;Steroid biosynthesis	2.439	2.3959	0.01683	0.29	6.4647	5.1453	5.619	5.8882	5.6744	5.9219	6.5042	6.8386	7.243	7.004
pos_4607	Secalciferol	metab_3974	yes	C07712	pos	55721-11-4	417.336	6.48037	M+H	C27H44O3	0	75.8	HMDB0006226;HMDB0060508	-	-	map01100;map01110;map00100	Metabolism;Metabolism;Metabolism	Global and overview maps;Global and overview maps;Lipid metabolism	Lipids and lipid-like molecules	Steroids and steroid derivatives	Vitamin D and derivatives	0	75.8	Metabolic pathways;Biosynthesis of secondary metabolites;Steroid biosynthesis	Metabolic pathways;Biosynthesis of secondary metabolites;Steroid biosynthesis	2.1463	2.0181	0.0006036	0.0716	5.7447	5.7003	5.8598	5.5137	5.9014	6.451	6.3755	6.4506	6.0701	6.1793
pos_4255	Calcidiol	metab_3585	yes	C01561	pos	19356-17-3	401.341	7.17188	M+H	C27H44O2	0	84.2	HMDB0003550	-	-	map01100;map04928;map05152;map01110;map00100	Metabolism;Organismal Systems;Human Diseases;Metabolism;Metabolism	Global and overview maps;Endocrine system;Infectious disease: bacterial;Global and overview maps;Lipid metabolism	Lipids and lipid-like molecules	Steroids and steroid derivatives	Vitamin D and derivatives	0	84.2	Metabolic pathways;Parathyroid hormone synthesis, secretion and action;Tuberculosis;Biosynthesis of secondary metabolites;Steroid biosynthesis	Metabolic pathways;Parathyroid hormone synthesis, secretion and action;Tuberculosis;Biosynthesis of secondary metabolites;Steroid biosynthesis	3.1305	2.9961	0.002434	0.1502	4.5743	4.5879	4.6158	4.6187	4.7228	5.5815	6.5687	6.7061	5.5906	5.1976
pos_4409	Dihydrotachysterol	metab_3755	yes	C06957	pos	67-96-9	462.368	6.79055	M+ACN+Na	C28H46O	0	53.2	HMDB0015203	-	-	-	-	-	Lipids and lipid-like molecules	Steroids and steroid derivatives	Vitamin D and derivatives	0	53.2	-	-	1.0757	1.0244	0.01269	0.2617	6.8461	6.6632	6.6793	6.7698	6.8059	7.0621	6.8719	6.9407	6.8285	6.911
pos_4552	14-Epi-19-nortachysterol	metab_3914	yes	C07711	pos	1173-13-3;17592-07-3	383.33	6.55202	M+H	C27H42O	0	41.1	HMDB0006560;HMDB0244581;HMDB0006500	-	-	-	-	-	Lipids and lipid-like molecules	Steroids and steroid derivatives	Vitamin D and derivatives	0	41.1	-	-	2.3413	2.2337	2.798e-05	0.009074	5.9986	5.9181	5.9231	5.672	5.8835	6.515	6.5296	6.466	6.6858	6.3765
neg_6822	Psilocin	metab_14200	yes	C08312	neg	520-53-6	249.124	3.43075	M+FA-H	C12H16N2O	0	49	HMDB0042000	-	-	map01110;map01063;map00901	Metabolism;Metabolism;Metabolism	Global and overview maps;Chemical structure transformation maps;Biosynthesis of other secondary metabolites	Organoheterocyclic compounds	Indoles and derivatives	Tryptamines and derivatives	0	49	Biosynthesis of secondary metabolites;Biosynthesis of alkaloids derived from shikimate pathway;Indole alkaloid biosynthesis	Biosynthesis of secondary metabolites;Biosynthesis of alkaloids derived from shikimate pathway;Indole alkaloid biosynthesis	1.8009	1.741	0.01669	0.2071	4.1207	3.9129	3.9781	3.403	4.5046	2.956	3.3198	3.5705	3.642	3.0766
pos_6159	5-Methoxytryptophan	metab_5683	yes	-	pos	2504-22-5	267.134	3.97132	M+CH3OH+H	C12H14N2O3	0	46.5	HMDB0002339	-	-	-	-	-	Organoheterocyclic compounds	Indoles and derivatives	Tryptamines and derivatives	0	46.5	-	-	3.4417	3.3118	0.02483	0.3272	3.0648	3.616	3.9133	3.6987	3.4413	3.0384	3.4685	0.3884	1.1412	0.3139
neg_2147	Bufotenin	metab_9029	yes	C08299	neg	487-93-4	249.124	4.26557	M+FA-H	C12H16N2O	0	31.2	HMDB0041842	-	-	-	-	-	Organoheterocyclic compounds	Indoles and derivatives	Tryptamines and derivatives	0	31.2	-	-	1.6882	1.6702	0.006619	0.1882	4.4573	4.5834	4.6388	4.4341	4.143	3.4181	3.7821	4.007	4.1191	4.0896
pos_866	DIOSGENIN	metab_7546	yes	C08898	pos	512-04-9	415.32	6.12315	M+H-H2O, M+H	C27H42O3	60.6	0	LMST01080037;HMDB0242671	Steroids	27-Carbon atoms	map01060	Metabolism	Chemical structure transformation maps	Lipids and lipid-like molecules	Prenol lipids	Triterpenoids	60.6	0	Biosynthesis of plant secondary metabolites	Biosynthesis of plant secondary metabolites	1.2984	1.26	0.003952	0.1831	6.4223	6.4648	6.4782	6.5639	6.3355	6.8145	6.5851	6.6229	6.636	6.7633
pos_1155	Ganoderiol I	metab_174	yes	-	pos	114567-49-6	503.371	6.49632	M+H-2H2O, M+H	C31H50O5	0	70.1	HMDB0037778	-	-	-	-	-	Lipids and lipid-like molecules	Prenol lipids	Triterpenoids	0	70.1	-	-	1.981	1.874	0.02008	0.3022	6.4086	6.4283	6.7528	7.1967	5.9935	5.8865	5.9808	6.0482	6.0482	5.8598
pos_3074	Asperagenin	metab_2291	yes	-	pos	17305-15-6	449.326	5.19377	M+H	C27H44O5	0	57.9	HMDB0034293	-	-	-	-	-	Lipids and lipid-like molecules	Prenol lipids	Triterpenoids	0	57.9	-	-	2.806	2.7118	0.0006177	0.07184	4.5356	3.7739	4.4201	4.1403	3.9088	5.3235	5.3683	4.7353	5.2367	5.1237
pos_3728	Albigenic acid	metab_3005	yes	-	pos	664-40-4	505.386	7.10802	M+CH3OH+H	C30H48O4	0	35.5	HMDB0036638	-	-	-	-	-	Lipids and lipid-like molecules	Prenol lipids	Triterpenoids	0	35.5	-	-	1.0079	0.9275	0.03603	0.3685	5.8593	5.7117	5.7458	5.7959	5.655	5.5063	5.754	5.4648	5.6629	5.5877
pos_4739	Spirotaccagenin	metab_4117	yes	-	pos	-	429.3	6.29762	M+H-H2O	C27H42O5	0	31.9	HMDB0034424	-	-	-	-	-	Lipids and lipid-like molecules	Prenol lipids	Triterpenoids	0	31.9	-	-	1.1595	1.123	0.0003717	0.05011	6.5881	6.611	6.6608	6.6179	6.5654	6.8037	6.8399	6.7151	6.7285	6.8029
pos_4990	Ganoderenic acid A	metab_4395	yes	-	pos	100665-40-5	556.33	6.06733	M+ACN+H	C30H42O7	0	45.7	HMDB0035381	-	-	-	-	-	Lipids and lipid-like molecules	Prenol lipids	Triterpenoids	0	45.7	-	-	2.8472	2.7489	0.0002259	0.03435	3.5433	3.5569	3.5848	3.5877	3.6917	4.642	4.5872	4.396	5.1079	4.1808
pos_59	Ruscogenin	metab_5394	yes	C08909	pos	472-11-7	413.304	6.28965	M+H-2H2O, M+NH4, M+H-H2O, M+Na	C27H42O4	0	31.1	LMST01080038;HMDB0257364	-	-	-	-	-	Lipids and lipid-like molecules	Prenol lipids	Triterpenoids	0	31.1	-	-	1.3319	1.2757	0.001263	0.1102	7.3359	7.4069	7.3832	7.2873	7.3412	7.686	7.5472	7.4842	7.5018	7.6646
pos_4571	Smilagenin	metab_7751	yes	C08913	pos	126-18-1;126-19-2	399.325	6.5361	M+H-H2O	C27H44O3	0	53.7	HMDB0251863;HMDB0030024;HMDB0030048;LMST01080005	Steroids	27-Carbon atoms	-	-	-	Lipids and lipid-like molecules	Prenol lipids	Triterpenoids	0	53.7	-	-	1.657	1.575	0.0001872	0.03085	6.3173	6.3272	6.2305	6.2273	6.4323	6.7341	6.6211	6.6453	6.5239	6.6613
neg_4113	(3beta,17alpha,23S,24S)-17,23-Epoxy-3,24,29-trihydroxy-27-norlanost-8-en-15-one	metab_11202	yes	-	neg	-	495.309	7.24935	M+Na-2H	C29H46O5	0	46	HMDB0035144	-	-	-	-	-	Lipids and lipid-like molecules	Prenol lipids	Triterpenoids	0	46	-	-	1.9717	1.8602	0.01905	0.215	5.7656	6.1004	6.3346	6.7631	6.8528	5.6002	5.3248	5.391	6.2428	5.3669
neg_4364	Ganoderic acid Mj	metab_11479	yes	-	neg	110024-15-2	581.321	6.5311	M+K-2H	C33H52O6	0	30.8	HMDB0035354	-	-	-	-	-	Lipids and lipid-like molecules	Prenol lipids	Triterpenoids	0	30.8	-	-	2.2339	2.1812	0.0009813	0.1114	5.5386	5.456	5.7264	5.9161	5.188	4.6588	4.2796	4.7782	5.0431	4.6629
neg_2677	Strigol	metab_9614	yes	C09190	neg	11017-56-4	383.092	5.22158	M+K-2H	C19H22O6	0	46	HMDB0036677	-	-	map00906;map01110;map01070	Metabolism;Metabolism;Metabolism	Metabolism of terpenoids and polyketides;Global and overview maps;Chemical structure transformation maps	Lipids and lipid-like molecules	Prenol lipids	Terpene lactones	0	46	Carotenoid biosynthesis;Biosynthesis of secondary metabolites;Biosynthesis of plant hormones	Carotenoid biosynthesis;Biosynthesis of secondary metabolites;Biosynthesis of plant hormones	1.9092	1.7996	0.007042	0.1889	5.4429	5.5402	4.7912	5.1449	5.669	4.4892	4.5656	4.5043	5.0226	4.671
pos_1206	Psilostachyin	metab_230	yes	-	pos	-	281.138	6.32127	M+H-H2O, M+H	C15H20O5	0	37.1	HMDB0302335	-	-	-	-	-	Lipids and lipid-like molecules	Prenol lipids	Terpene lactones	0	37.1	-	-	1.1408	1.0744	0.02374	0.3207	6.7413	6.5815	6.7881	6.7385	6.5389	6.4267	6.4566	6.322	6.5756	6.6095
pos_5407	3-Epinobilin	metab_4854	yes	-	pos	-	385.143	5.43447	M+K	C20H26O5	0	33.9	HMDB0036690	-	-	-	-	-	Lipids and lipid-like molecules	Prenol lipids	Terpene lactones	0	33.9	-	-	1.0511	1.0446	0.04971	0.4054	6.0469	6.2874	6.4198	6.1459	6.0832	6.0195	6.1016	6.0445	5.7929	6.0189
neg_3060	Vulgarin	metab_10038	yes	C09600	neg	3162-56-9	285.113	5.89217	M+Na-2H	C15H20O4	0	57.8	HMDB0036130	-	-	-	-	-	Lipids and lipid-like molecules	Prenol lipids	Terpene lactones	0	57.8	-	-	1.782	1.7712	0.02498	0.2293	5.5945	5.2728	5.7039	5.8389	4.9823	4.1245	5.1571	4.5722	4.5967	5.302
neg_3123	Canin	metab_10107	yes	C09354	neg	24959-84-0	259.097	5.94705	M-H2O-H	C15H18O5	0	62.8	HMDB0302700;HMDB0249584	-	-	-	-	-	Lipids and lipid-like molecules	Prenol lipids	Terpene lactones	0	62.8	-	-	2.5036	2.4566	0.003088	0.151	5.362	5.1633	4.9981	5.5502	4.9791	4.8045	3.5591	3.5305	4.0935	4.426
neg_3135	3b-Hydroxy-6b-methoxy-7(11)-eremophilen-12,8a-olide	metab_10120	yes	-	neg	162613-64-1	315.135	5.95487	M+Cl	C16H24O4	0	64.4	HMDB0040755	-	-	-	-	-	Lipids and lipid-like molecules	Prenol lipids	Terpene lactones	0	64.4	-	-	1.1974	1.1344	0.006884	0.1889	5.8287	5.6663	5.5499	5.852	5.8658	5.3626	5.4695	5.4795	5.6018	5.5261
neg_6211	Cynaropicrin	metab_15369	yes	C09385	neg	35730-78-0	383.092	4.06838	M+K-2H	C19H22O6	0	57.5	HMDB0036423	-	-	-	-	-	Lipids and lipid-like molecules	Prenol lipids	Terpene lactones	0	57.5	-	-	1.0385	1.0117	0.0449	0.266	5.9007	5.9284	6.1828	6.2414	6.4115	5.7692	5.9517	5.9911	5.7664	5.9099
neg_2836	Ajugol	metab_9790	yes	-	neg	-	347.135	5.48687	M-H	C15H24O9	0	30.3	HMDB0248074;HMDB0242331	-	-	-	-	-	Lipids and lipid-like molecules	Prenol lipids	Terpene glycosides	0	30.3	-	-	2.1416	2.1229	0.02271	0.2224	5.0583	5.6734	4.8656	3.6591	5.3777	4.1013	4.0833	3.9391	3.8431	3.6833
neg_3012	(4R,6S)-p-Menth-1-ene-4,6-diol 4-glucoside	metab_9985	yes	-	neg	359875-78-8	331.176	5.83668	M-H	C16H28O7	0	46.1	HMDB0038980	-	-	-	-	-	Lipids and lipid-like molecules	Prenol lipids	Terpene glycosides	0	46.1	-	-	1.4987	1.4768	0.0266	0.2355	5.4496	5.4272	5.1372	5.8083	5.5156	4.651	5.4304	5.2199	4.7435	4.743
neg_5567	L-Citronellol glucoside	metab_12812	yes	-	neg	117895-55-3	353.172	4.97482	M+Cl	C16H30O6	0	41.9	HMDB0029850	-	-	-	-	-	Lipids and lipid-like molecules	Prenol lipids	Terpene glycosides	0	41.9	-	-	1.6531	1.5801	0.04268	0.266	5.6457	5.461	5.2983	5.6673	4.9865	5.189	4.3888	4.1372	5.1906	5.0777
neg_453	Homocastasterone	metab_11663	yes	-	neg	-	477.358	6.49982	M-H, M+Cl	C29H50O5	0	47.4	HMDB0253202	-	-	-	-	-	Lipids and lipid-like molecules	Steroids and steroid derivatives	Stigmastanes and derivatives	0	47.4	-	-	1.075	1.0445	0.04012	0.266	6.7843	6.7425	6.7538	7.2339	6.6481	6.4903	6.6361	6.4507	6.5968	6.6419
neg_3389	Tuberoside	metab_10400	yes	-	neg	140447-21-8	637.396	6.42168	M+FA-H	C34H56O8	0	46.6	HMDB0039054	-	-	-	-	-	Lipids and lipid-like molecules	Steroids and steroid derivatives	Steroidal glycosides	0	46.6	-	-	1.9673	1.9382	0.03184	0.2466	7.1093	7.2212	6.2652	6.3314	5.9321	6.3558	5.1689	5.2942	5.9396	5.7843
neg_3429	Collettiside I	metab_10445	yes	-	neg	14144-06-0	621.365	6.49198	M+FA-H	C33H52O8	0	33.1	LMST01080094;HMDB0029310	-	-	-	-	-	Lipids and lipid-like molecules	Steroids and steroid derivatives	Steroidal glycosides	0	33.1	-	-	2.3823	2.3536	0.008821	0.1942	6.1254	6.2094	5.2393	5.6424	4.6189	4.9087	4.036	4.2728	4.597	4.3399
neg_4166	3-O-beta-D-glucosyl-brassicasterol	metab_11260	yes	-	neg	-	605.406	6.96863	M+FA-H	C34H56O6	0	52.5	HMDB0304143	-	-	-	-	-	Lipids and lipid-like molecules	Steroids and steroid derivatives	Steroidal glycosides	0	52.5	-	-	2.1678	2.0817	0.0006595	0.1005	6.6587	6.924	6.5824	7.1902	6.7552	5.9894	5.7162	6.0496	6.3431	6.05
neg_5300	Physagulin D	metab_12517	yes	-	neg	146713-92-0	619.346	5.35798	M-H	C34H52O10	0	39	HMDB0041049;LMST01160046	-	-	-	-	-	Lipids and lipid-like molecules	Steroids and steroid derivatives	Steroid lactones	0	39	-	-	1.1238	1.0991	0.03754	0.2639	3.2396	2.9318	2.9021	3.4063	3.015	2.5864	2.9499	2.9214	2.8519	2.7069
neg_3461	Testosterone enanthate	metab_10480	yes	C08157	neg	315-37-7	445.296	6.54675	M+FA-H	C26H40O3	0	35.6	LMST02020075;HMDB0005814	-	-	-	-	-	Lipids and lipid-like molecules	Steroids and steroid derivatives	Steroid esters	0	35.6	-	-	3.0303	3.0567	0.03356	0.25	3.0563	3.1051	4.3831	3.2395	3.2215	2.7926	6.6296	6.8017	5.8806	4.8416
neg_5602	Solavetivone	metab_12852	yes	C09737	neg	54878-25-0	255.114	4.9193	M+K-2H	C15H22O	0	35.5	HMDB0035657	-	-	map01110;map00909	Metabolism;Metabolism	Global and overview maps;Metabolism of terpenoids and polyketides	Lipids and lipid-like molecules	Prenol lipids	Sesquiterpenoids	0	35.5	Biosynthesis of secondary metabolites;Sesquiterpenoid and triterpenoid biosynthesis	Biosynthesis of secondary metabolites;Sesquiterpenoid and triterpenoid biosynthesis	1.7401	1.6712	0.04256	0.266	4.5359	4.4062	3.6768	3.3697	4.2141	2.9227	3.2865	3.5004	3.9654	3.0433
pos_2771	Calonectrin	metab_1956	yes	-	pos	-	389.137	4.29402	M+K	C19H26O6	0	41.8	HMDB0034915	-	-	-	-	-	Lipids and lipid-like molecules	Prenol lipids	Sesquiterpenoids	0	41.8	-	-	1.9416	1.861	0.009501	0.2471	4.5357	4.7162	5.3028	4.8001	5.1296	4.3984	4.5338	4.0629	4.4577	4.2827
pos_3186	2-beta-Ethoxydihydrophytuberin	metab_2415	yes	-	pos	-	358.259	5.53912	M+NH4	C19H32O5	0	35.5	HMDB0302962	-	-	-	-	-	Lipids and lipid-like molecules	Prenol lipids	Sesquiterpenoids	0	35.5	-	-	2.0377	1.9722	0.00098	0.09374	5.8929	5.9937	5.7365	5.6668	6.0679	5.4265	5.5625	5.2653	5.128	5.3074
pos_3552	Vomifoliol	metab_2814	yes	C04166	pos	-	189.127	6.45648	M+H-2H2O	C13H20O3	0	79	HMDB0303570	-	-	-	-	-	Lipids and lipid-like molecules	Prenol lipids	Sesquiterpenoids	0	79	-	-	1.4806	1.4009	0.0108	0.2594	6.5573	6.5362	6.899	6.8176	6.4501	6.3659	6.375	6.1813	6.3864	6.3757
pos_4077	Curcumenol	metab_3389	yes	C16942	pos	19431-84-6	510.356	7.73553	2M+ACN+H	C15H22O2	0	49.9	HMDB0033960;MJDBOTE0000956	-	-	-	-	-	Lipids and lipid-like molecules	Prenol lipids	Sesquiterpenoids	0	49.9	-	-	2.6862	2.548	0.002568	0.1502	3.9978	4.0114	4.0393	4.0422	4.1463	5.3979	4.1627	5.0547	5.2301	5.036
neg_1757	Furanodienone	metab_8596	yes	C16960	neg	24268-41-5	251.104	3.74533	M+Na-2H	C15H18O2	0	44.8	HMDB0036768	-	-	-	-	-	Lipids and lipid-like molecules	Prenol lipids	Sesquiterpenoids	0	44.8	-	-	1.3857	1.3399	0.02902	0.2381	5.3603	5.7266	5.5955	5.112	5.7138	4.9963	4.7571	5.3184	5.3211	4.9964
neg_4668	Cinncassiol C3	metab_11815	yes	C17641	neg	64979-94-8	381.195	6.12623	M-H	C20H30O7	0	34.1	HMDB0036859	-	-	-	-	-	Lipids and lipid-like molecules	Prenol lipids	Sesquiterpenoids	0	34.1	-	-	1.7902	1.8164	0.04183	0.266	5.2587	5.6134	6.5326	4.8046	5.6625	4.3573	5.3448	4.988	4.6232	4.478
neg_4984	Toxin T2 tetrol	metab_12165	yes	-	neg	34114-99-3	343.14	5.84515	M+FA-H	C15H22O6	0	38.5	HMDB0036159	-	-	-	-	-	Lipids and lipid-like molecules	Prenol lipids	Sesquiterpenoids	0	38.5	-	-	2.0525	1.9905	6.689e-05	0.04802	6.113	6.0157	5.8564	6.1127	6.1672	5.1223	5.5711	5.3497	5.4046	5.3995
pos_6561	4-Oxo-13-cis-retinoate	metab_6128	yes	-	pos	-	378.202	3.33638	M+ACN+Na	C20H26O3	0	35	HMDB0012789	-	-	-	-	-	Lipids and lipid-like molecules	Prenol lipids	Retinoids	0	35	-	-	1.4422	1.4083	0.006949	0.2139	5.9906	5.7572	5.7138	6.0886	6.0207	6.2921	6.3352	6.2241	6.1276	6.1347
neg_472	Withanolide B	metab_11873	yes	C00828	neg	56973-41-2	435.252	6.68757	M-H2O-H, M+K-2H	C28H38O5	0	33.6	HMDB0030020	Vitamins and cofactors	Vitamins	map01100;map01110;map01240;map00130;map04977;map02020	Metabolism;Metabolism;Metabolism;Metabolism;Organismal Systems;Environmental Information Processing	Global and overview maps;Global and overview maps;Global and overview maps;Metabolism of cofactors and vitamins;Digestive system;Signal transduction	Lipids and lipid-like molecules	Prenol lipids	Quinone and hydroquinone lipids	0	33.6	Metabolic pathways;Biosynthesis of secondary metabolites;Biosynthesis of cofactors;Ubiquinone and other terpenoid-quinone biosynthesis;Vitamin digestion and absorption;Two-component system	Metabolic pathways;Biosynthesis of secondary metabolites;Biosynthesis of cofactors;Ubiquinone and other terpenoid-quinone biosynthesis;Vitamin digestion and absorption;Two-component system	1.6907	1.6473	0.04907	0.266	5.0035	5.2531	4.5833	4.7144	4.6964	6.0575	5.539	5.6615	4.5331	5.7994
neg_4501	13'-Carboxy-gamma-tocopherol	metab_11632	yes	-	neg	-	491.338	6.35927	M+FA-H	C28H46O4	0	37.2	HMDB0012557	-	-	-	-	-	Lipids and lipid-like molecules	Prenol lipids	Quinone and hydroquinone lipids	0	37.2	-	-	1.0596	1.0329	0.04138	0.266	6.5137	6.4126	6.449	6.7563	6.1511	6.1565	6.1718	6.0323	6.3079	6.2892
neg_6600	2,4-Quinolinediol	metab_13955	yes	C16716	neg	-	206.045	3.65065	M+FA-H	C9H7NO2	0	60	HMDB0245468	-	-	map01063	Metabolism	Chemical structure transformation maps	Organoheterocyclic compounds	Quinolines and derivatives	Quinolones and derivatives	0	60	Biosynthesis of alkaloids derived from shikimate pathway	Biosynthesis of alkaloids derived from shikimate pathway	1.3813	1.3065	0.00716	0.1889	5.6101	5.2952	5.3106	5.6234	5.6448	5.1002	5.1283	4.9695	5.2999	5.2347
pos_749	8-Hydroxycarteolol	metab_7147	yes	-	pos	-	309.18	5.12177	M+H, M+Na	C16H24N2O4	0	66	HMDB0060990	-	-	-	-	-	Organoheterocyclic compounds	Quinolines and derivatives	Quinolones and derivatives	0	66	-	-	1.4283	1.3639	0.006631	0.2137	5.9003	5.9028	5.9792	5.9937	6.114	5.8877	5.6469	5.4624	5.7365	5.714
pos_574	2-Hydroxyquinoline-3-carboxylic acid	metab_5218	yes	-	pos	-	190.05	3.5926	M+H, M+CH3OH+H	C10H7NO3	0	48.4	HMDB0245167	-	-	-	-	-	Organoheterocyclic compounds	Quinolines and derivatives	Quinoline carboxylic acids	0	48.4	-	-	1.4258	1.3951	0.02187	0.3146	5.4223	5.7707	5.515	5.4832	5.9422	5.2045	5.099	5.4052	5.3806	5.3928
neg_6125	4-Oxo-1,4-dihydroquinoline-3-carboxylic acid	metab_13431	yes	-	neg	-	188.035	4.163	M-H	C10H7NO3	0	31.7	HMDB0246559	-	-	-	-	-	Organoheterocyclic compounds	Quinolines and derivatives	Quinoline carboxylic acids	0	31.7	-	-	1.5757	1.4939	0.008627	0.1942	5.441	5.9044	5.5222	5.6707	5.8138	5.1361	4.8545	5.1983	5.4064	5.4221
neg_5650	1-Hydroxy-2,2,5,5-tetramethyl-2,5-dihydro-1h-pyrrole-3-carboxamide	metab_12904	yes	-	neg	-	413.24	4.84137	2M+FA-H	C9H16N2O2	0	33.9	HMDB0243893	-	-	-	-	-	Organoheterocyclic compounds	Pyrrolines	Pyrroline carboxylic acids and derivatives	0	33.9	-	-	2.3413	2.2916	0.009625	0.1942	3.1778	4.6348	3.7191	2.7357	3.7966	2.2898	2.6527	2.6242	2.5548	2.41
pos_6128	(2-Pyridin-3-ylpyrrolidin-1-yl)methanol	metab_5649	yes	-	pos	-	374.253	4.00333	2M+NH4	C10H14N2O	0	33.9	HMDB0242480	-	-	-	-	-	Organoheterocyclic compounds	Pyridines and derivatives	Pyrrolidinylpyridines	0	33.9	-	-	1.5584	1.472	0.01142	0.2594	5.5995	5.5792	5.6133	5.5578	5.6003	5.4293	5.4586	4.8804	5.1333	5.2987
pos_1949	5-Methylcytosine	metab_1050	yes	C02376	pos	554-01-8	126.066	1.88452	M+H	C5H7N3O	41	0	HMDB0002894;MJDBOTE0000559	-	-	map00240;map01100	Metabolism;Metabolism	Nucleotide metabolism;Global and overview maps	Organoheterocyclic compounds	Diazines	Pyrimidines and pyrimidine derivatives	41	0	Pyrimidine metabolism;Metabolic pathways	Pyrimidine metabolism;Metabolic pathways	2.3196	2.2715	0.002893	0.1591	4.3007	4.2682	4.1804	4.0349	3.7828	3.1047	3.7537	3.7198	3.2042	3.1629
pos_735	4'-Hydroxymethohexital	metab_6996	yes	-	pos	-	301.118	4.98573	M+H, M+Na	C14H18N2O4	0	47	HMDB0246635	-	-	-	-	-	Organoheterocyclic compounds	Diazines	Pyrimidines and pyrimidine derivatives	0	47	-	-	1.8	1.7433	0.01334	0.2651	4.744	4.5887	4.3879	4.5217	4.6617	4.1592	3.554	4.0269	4.3809	4.2933
neg_6266	2,4,6(1H,3H,5H)-Pyrimidinetrione, 5-ethyl-5-(3-hydroxy-1-methylbutyl)-	metab_13584	yes	-	neg	-	287.125	4.01348	M+FA-H	C11H18N2O4	0	37	HMDB0246099	-	-	-	-	-	Organoheterocyclic compounds	Diazines	Pyrimidines and pyrimidine derivatives	0	37	-	-	1.5149	1.4857	0.008025	0.1921	5.7288	5.8822	6.1788	5.5198	5.7826	5.3585	5.1624	5.3393	5.6188	5.3291
neg_6665	AFN911	metab_14026	yes	-	neg	-	546.242	3.58013	M+Cl	C29H33N7O2	0	66	HMDB0013863	-	-	-	-	-	Organoheterocyclic compounds	Diazines	Pyrimidines and pyrimidine derivatives	0	66	-	-	1.51	1.5333	0.03703	0.262	5.1785	4.3149	5.0374	4.229	4.2109	3.7817	4.1457	4.1172	4.1982	3.9024
pos_6680	2'-Fluorothymidine	metab_6259	yes	-	pos	-	225.069	3.17705	M+H-2H2O	C10H13FN2O5	0	36.4	HMDB0245532	-	-	-	-	-	Nucleosides, nucleotides, and analogues	Pyrimidine nucleosides	Pyrimidine 2''-deoxyribonucleosides	0	36.4	-	-	1.47	1.4077	0.0289	0.3387	4.7638	4.6263	4.3902	4.7169	4.3721	4.4272	4.3433	4.0764	3.9311	4.3955
neg_6391	Gemcitabine	metab_13723	yes	C07650	neg	95058-81-4	300.018	3.87977	M+K-2H	C9H11F2N3O4	0	37.9	PW_C008951;HMDB0014584	-	-	-	-	-	Nucleosides, nucleotides, and analogues	Pyrimidine nucleosides	Pyrimidine 2''-deoxyribonucleosides	0	37.9	-	-	1.8507	1.8006	0.003207	0.151	5.3374	5.1591	5.1348	5.0768	5.518	4.2027	4.8959	4.7815	4.7573	4.4133
neg_7257	Thymidine glycol	metab_14681	yes	-	neg	32645-65-1	275.089	1.6281	M-H	C10H16N2O7	0	55.4	HMDB0042036	-	-	-	-	-	Nucleosides, nucleotides, and analogues	Pyrimidine nucleosides	Pyrimidine 2''-deoxyribonucleosides	0	55.4	-	-	1.2828	1.2688	0.03049	0.2427	4.7637	4.523	4.3881	4.8036	4.9877	4.3663	4.5041	4.2837	4.0327	4.488
neg_1301	3'-Deoxythymidine	metab_8092	yes	-	neg	-	207.077	3.20965	M-H2O-H	C10H14N2O4	0	45.6	HMDB0246094	-	-	-	-	-	Nucleosides, nucleotides, and analogues	Pyrimidine nucleosides	Pyrimidine 2'',3''-dideoxyribonucleosides	0	45.6	-	-	1.0288	1.0098	0.0411	0.266	5.2457	5.231	5.3632	5.7005	5.4452	5.0282	5.3367	5.1875	5.0107	5.1578
neg_6590	4-Pyridoxolactone	metab_13943	yes	C00971	neg	4753-19-9	146.024	3.65848	M-H2O-H	C8H7NO3	0	46.9	HMDB0003454	-	-	map00750;map01120	Metabolism;Metabolism	Metabolism of cofactors and vitamins;Global and overview maps	Organoheterocyclic compounds	Pyridines and derivatives	Pyridinecarboxylic acids and derivatives	0	46.9	Vitamin B6 metabolism;Microbial metabolism in diverse environments	Vitamin B6 metabolism;Microbial metabolism in diverse environments	1.4811	1.3938	0.009413	0.1942	4.7065	4.4643	4.3799	4.6298	4.6755	4.1928	4.0692	3.8303	4.4199	4.307
pos_6082	4-Formylaminoantipyrine	metab_5598	yes	-	pos	-	249.134	4.08397	M+NH4	C12H13N3O2	63.6	0	HMDB0246429	-	-	-	-	-	Organoheterocyclic compounds	Azoles	Pyrazoles	63.6	0	-	-	3.1819	3.0919	0.0267	0.33	3.3497	0.5916	3.4371	4.0613	3.714	4.8773	4.6983	4.7185	4.5749	4.7392
neg_5113	Niraxostat	metab_12310	yes	-	neg	-	344.125	5.65393	M+FA-H	C16H17N3O3	0	35	HMDB0255624	-	-	-	-	-	Organoheterocyclic compounds	Azoles	Pyrazoles	0	35	-	-	1.8596	1.815	0.000886	0.1111	5.5053	5.2814	5.5218	5.5155	5.2203	4.4757	4.8098	4.7456	5.0806	4.8905
pos_7473	Stizolamine	metab_7129	yes	-	pos	-	198.097	0.937883	M+H	C7H11N5O2	0	30.2	HMDB0302288	-	-	-	-	-	Organoheterocyclic compounds	Diazines	Pyrazines	0	30.2	-	-	2.5566	2.3676	0.04697	0.3981	5.5776	5.3723	4.48	3.2191	5.4981	5.8943	6.0196	6.1712	5.7378	5.6853
neg_807	Herierin IV	metab_15147	yes	-	neg	131123-57-4	215.056	3.24877	M-H, M+FA-H	C8H10O4	0	49.4	HMDB0038761	-	-	-	-	-	Organoheterocyclic compounds	Pyrans	Pyranones and derivatives	0	49.4	-	-	1.0502	1.0344	0.006392	0.1863	5.7756	5.6804	5.7148	5.8888	5.6931	5.3708	5.6417	5.5892	5.5486	5.5092
pos_3253	9-(4-Fluoro-3-(hydroxymethyl)butyl)guanine	metab_2488	yes	-	pos	-	319.129	5.76348	M+ACN+Na	C10H14FN5O2	0	34.1	HMDB0245591	-	-	-	-	-	Organoheterocyclic compounds	Imidazopyrimidines	Purines and purine derivatives	0	34.1	-	-	1.716	1.6696	0.02825	0.3374	3.6633	3.5549	3.4734	3.4763	3.5804	4.4807	4.0773	3.5603	3.7049	4.3472
pos_4553	2-Amino-9-[4-hydroxy-2-(hydroxymethyl)butyl]-3H-purin-6-one	metab_3915	yes	-	pos	-	271.154	6.55202	M+NH4	C10H15N5O3	0	36.5	HMDB0244320	-	-	-	-	-	Organoheterocyclic compounds	Imidazopyrimidines	Purines and purine derivatives	0	36.5	-	-	1.5303	1.4462	0.02319	0.3201	4.3705	4.0183	4.4712	4.448	3.9107	3.6977	3.9271	3.8907	3.8916	4.0217
neg_2830	Pentoxifylline	metab_9784	yes	C07424	neg	6493-05-06	323.136	5.47903	M+FA-H	C13H18N4O3	0	79.1	HMDB0014944;MJDBOTE0001686	-	-	-	-	-	Organoheterocyclic compounds	Imidazopyrimidines	Purines and purine derivatives	0	79.1	-	-	1.203	1.1683	0.008512	0.1942	5.2143	5.1026	5.4069	5.3195	5.1309	4.8894	4.8973	4.7881	5.0918	5.0816
neg_6027	6-hydroxymethyl-7,8-dihydropterin	metab_13322	yes	C01300	neg	-	389.146	4.27338	2M-H	C7H9N5O2	0	38.8	HMDB0304227	-	-	map01100;map00790;map01240	Metabolism;Metabolism;Metabolism	Global and overview maps;Metabolism of cofactors and vitamins;Global and overview maps	Organoheterocyclic compounds	Pteridines and derivatives	Pterins and derivatives	0	38.8	Metabolic pathways;Folate biosynthesis;Biosynthesis of cofactors	Metabolic pathways;Folate biosynthesis;Biosynthesis of cofactors	1.7738	1.7647	0.01452	0.1971	5.4596	5.2888	4.9816	5.6009	4.4626	4.6311	4.4387	4.3599	4.3276	4.6934
neg_795	Aminopterin	metab_15133	yes	D02527	neg	54-62-6	485.151	3.15415	M-H2O-H, M+FA-H	C19H20N8O5	0	50.9	HMDB0001833	-	-	-	-	-	Organoheterocyclic compounds	Pteridines and derivatives	Pterins and derivatives	0	50.9	-	-	2.0869	2.0088	0.004294	0.1672	5.9263	5.7314	5.7639	5.3387	4.8715	6.1729	6.4636	6.3192	6.4237	6.1798
pos_4714	11,17-Dihydroxy-3,20-dioxopregn-4-en-21-yl acetate	metab_4090	yes	-	pos	-	446.253	6.32127	M+ACN+H	C23H32O6	0	37.7	HMDB0244374	-	-	-	-	-	Lipids and lipid-like molecules	Steroids and steroid derivatives	Pregnane steroids	0	37.7	-	-	1.5377	1.4326	0.02319	0.3201	6.2052	6.1013	6.382	6.3768	5.9478	5.7176	5.9103	5.5576	5.9493	6.1068
pos_6414	Difluprednate	metab_5967	yes	C12695	pos	23674-86-4	550.262	3.5606	M+ACN+H	C27H34F2O7	0	49.8	HMDB0015676	-	-	-	-	-	Lipids and lipid-like molecules	Steroids and steroid derivatives	Pregnane steroids	0	49.8	-	-	4.5327	4.3322	6.015e-07	0.0004471	3.3119	3.3255	3.3534	3.3563	3.6903	5.6802	5.9686	6.1883	5.3607	5.5315
pos_6599	Diflucortolone valerate	metab_6169	yes	-	pos	-	511.291	3.28113	M+CH3OH+H	C27H36F2O5	0	34.6	HMDB0251261	-	-	-	-	-	Lipids and lipid-like molecules	Steroids and steroid derivatives	Pregnane steroids	0	34.6	-	-	1.4636	1.4151	0.003859	0.1817	6.2788	6.1745	6.1295	6.1476	5.9467	5.9792	5.8425	5.7233	5.9193	5.7336
neg_3051	Bemegride	metab_10028	yes	-	neg	-	200.092	5.88433	M+FA-H	C8H13NO2	0	33.1	HMDB0248936	-	-	-	-	-	Organoheterocyclic compounds	Piperidines	Piperidinones	0	33.1	-	-	1.6276	1.5669	0.00321	0.151	5.3141	5.3538	5.2153	5.2921	5.0129	4.6781	4.5987	4.5463	5.0801	4.8804
pos_5287	6'-Hydroxybuspirone	metab_4721	yes	-	pos	-	443.275	5.70748	M+ACN+H	C21H31N5O3	0	55.2	HMDB0061110	-	-	-	-	-	Organoheterocyclic compounds	Diazinanes	Piperazines	0	55.2	-	-	2.8234	2.6993	0.01394	0.2676	4	3.689	4.0619	3.6696	5.3842	5.1027	5.8377	5.853	5.128	4.8234
pos_5650	Difloxacin	metab_5120	yes	C11234	pos	98106-17-3	417.176	4.94572	M+NH4	C21H19F2N3O3	72.8	0	HMDB0251259	-	-	-	-	-	Organoheterocyclic compounds	Quinolines and derivatives	Phenylquinolines	72.8	0	-	-	1.7071	1.613	0.001261	0.1102	4.9296	4.9305	5.1228	4.9752	5.031	4.4691	4.7743	4.4799	4.7606	4.6696
pos_2879	Enol-phenylpyruvate	metab_2073	yes	C02763	pos	5801-57-0	147.044	4.59172	M+H-H2O	C9H8O3	0	55.5	HMDB0012225	-	-	map01100;map00360	Metabolism;Metabolism	Global and overview maps;Amino acid metabolism	Benzenoids	Benzene and substituted derivatives	Phenylpyruvic acid derivatives	0	55.5	Metabolic pathways;Phenylalanine metabolism	Metabolic pathways;Phenylalanine metabolism	1.7472	1.7533	0.03556	0.3668	5.3607	4.4129	4.3157	4.6823	4.7232	4.2006	4.0612	4.5147	3.976	4.1618
pos_3281	2-(beta-D-Mannopyranosyl)-L-tryptophan	metab_2518	yes	-	pos	-	349.139	5.84395	M+H-H2O	C17H22N2O7	0	80.3	HMDB0258059	-	-	-	-	-	Organoheterocyclic compounds	Pyridines and derivatives	Phenylpyridines	0	80.3	-	-	1.4938	1.4117	0.03924	0.3761	5.6031	5.2225	5.3368	5.4938	5.7678	4.7524	5.1282	5.1136	5.4582	5.1553
neg_216	4-Hydroxyphenylacetaldehyde	metab_9043	yes	C03765	neg	7339-87-9	181.05	3.91888	M-H, M+FA-H	C8H8O2	0	53.5	HMDB0003767	-	-	map01100;map01110;map00950;map00350;map01063;map01060	Metabolism;Metabolism;Metabolism;Metabolism;Metabolism;Metabolism	Global and overview maps;Global and overview maps;Biosynthesis of other secondary metabolites;Amino acid metabolism;Chemical structure transformation maps;Chemical structure transformation maps	Benzenoids	Benzene and substituted derivatives	Phenylacetaldehydes	0	53.5	Metabolic pathways;Biosynthesis of secondary metabolites;Isoquinoline alkaloid biosynthesis;Tyrosine metabolism;Biosynthesis of alkaloids derived from shikimate pathway;Biosynthesis of plant secondary metabolites	Metabolic pathways;Biosynthesis of secondary metabolites;Isoquinoline alkaloid biosynthesis;Tyrosine metabolism;Biosynthesis of alkaloids derived from shikimate pathway;Biosynthesis of plant secondary metabolites	1.8672	1.8127	0.02063	0.2186	5.664	6.6098	6.336	6.5265	6.2791	5.1739	5.7008	5.0651	6.0413	5.8184
pos_4796	Aglepristone	metab_4180	yes	-	pos	-	464.319	6.24203	M+CH3OH+H	C29H37NO2	0	51.8	HMDB0248061	-	-	-	-	-	Lipids and lipid-like molecules	Steroids and steroid derivatives	Oxosteroids	0	51.8	-	-	1.1364	1.0661	0.04948	0.4051	6.0613	5.9666	6.0416	6.2749	5.7861	5.7093	5.6637	5.8399	5.9177	5.9084
pos_3409	Lucidenic acid M	metab_2659	yes	C10029	pos	110241-33-3	427.284	6.07533	M+H-2H2O	C27H42O6	0	38	HMDB0035973	-	-	-	-	-	Phenylpropanoids and polyketides	Flavonoids	O-methylated flavonoids	0	38	-	-	1.5781	1.5089	7.517e-05	0.01651	5.7134	5.6748	5.8217	5.7597	5.7421	6.1175	6.1142	6.0102	5.9918	5.9659
pos_6940	5'-Deoxy-5'-fluorouridine	metab_6546	yes	C12739	pos	-	279.101	2.81942	M+CH3OH+H	C9H11FN2O5	0	40.2	HMDB0060406;HMDB0246881	-	-	map00983	Metabolism	Xenobiotics biodegradation and metabolism	Nucleosides, nucleotides, and analogues	5''-deoxyribonucleosides	Not Available	0	40.2	Drug metabolism - other enzymes	Drug metabolism - other enzymes	1.7709	1.7127	0.01769	0.2945	5.9803	6.0979	6.7354	6.124	6.0094	5.3924	5.5857	5.8694	5.7936	5.8365
pos_6341	3-(2-Hydroxyphenyl)propanoic acid	metab_5886	yes	C01198	pos	495-78-3	208.097	3.66497	M+ACN+H	C9H10O3	0	66.1	HMDB0033752	-	-	map01100;map00624;map00360;map01120	Metabolism;Metabolism;Metabolism;Metabolism	Global and overview maps;Xenobiotics biodegradation and metabolism;Amino acid metabolism;Global and overview maps	Phenylpropanoids and polyketides	Phenylpropanoic acids	Not Available	0	66.1	Metabolic pathways;Polycyclic aromatic hydrocarbon degradation;Phenylalanine metabolism;Microbial metabolism in diverse environments	Metabolic pathways;Polycyclic aromatic hydrocarbon degradation;Phenylalanine metabolism;Microbial metabolism in diverse environments	1.2612	1.1837	0.004766	0.1884	4.1655	4.3008	4.318	4.269	4.1698	3.9463	4.1458	3.9122	4.0817	4.077
pos_3148	2-Furanmethanol	metab_2373	yes	C20441	pos	98-00-0	197.081	5.42647	2M+H	C5H6O2	0	52.2	HMDB0013742	-	-	map01120;map00365	Metabolism;Metabolism	Global and overview maps;Xenobiotics biodegradation and metabolism	Organoheterocyclic compounds	Heteroaromatic compounds	Not Available	0	52.2	Microbial metabolism in diverse environments;Furfural degradation	Microbial metabolism in diverse environments;Furfural degradation	2.0328	1.9583	0.01294	0.2637	3.9551	3.7869	3.3959	3.3755	3.139	3.9327	3.7887	4.241	4.2967	4.4428
pos_3231	Bioepiderm	metab_2465	yes	C00120	pos	58-85-5	308.106	5.69148	M+ACN+Na	C10H16N2O3S	0	47.1	HMDB0249220;HMDB0000030	Vitamins and cofactors	Cofactors	map01100;map00780;map02010;map04977;map01240	Metabolism;Metabolism;Environmental Information Processing;Organismal Systems;Metabolism	Global and overview maps;Metabolism of cofactors and vitamins;Membrane transport;Digestive system;Global and overview maps	Organoheterocyclic compounds	Biotin and derivatives	Not Available	0	47.1	Metabolic pathways;Biotin metabolism;ABC transporters;Vitamin digestion and absorption;Biosynthesis of cofactors	Metabolic pathways;Biotin metabolism;ABC transporters;Vitamin digestion and absorption;Biosynthesis of cofactors	2.2109	2.1058	0.001818	0.1331	5.2052	4.973	4.803	4.9812	4.7788	4.4316	4.1388	3.9568	4.6108	4.417
pos_5545	Hydrocinnamic acid	metab_5004	yes	C05629	pos	501-52-0	192.102	5.16177	M+ACN+H	C9H10O2	0	44.3	HMDB0000764	-	-	map01100;map01220;map00360;map01120	Metabolism;Metabolism;Metabolism;Metabolism	Global and overview maps;Global and overview maps;Amino acid metabolism;Global and overview maps	Phenylpropanoids and polyketides	Phenylpropanoic acids	Not Available	0	44.3	Metabolic pathways;Degradation of aromatic compounds;Phenylalanine metabolism;Microbial metabolism in diverse environments	Metabolic pathways;Degradation of aromatic compounds;Phenylalanine metabolism;Microbial metabolism in diverse environments	1.0851	1.0363	0.0256	0.33	4.9503	4.7602	4.7203	4.836	4.7037	4.712	4.5122	4.4572	4.693	4.6601
pos_5904	Vindoline	metab_5400	yes	C01626	pos	2182-14-1	421.211	4.41453	M+H-2H2O	C25H32N2O6	0	71.6	HMDB0259814;MJDBOTE0000982	-	-	map01110;map01063;map00901	Metabolism;Metabolism;Metabolism	Global and overview maps;Chemical structure transformation maps;Biosynthesis of other secondary metabolites	Alkaloids and derivatives	Plumeran-type alkaloids	Not Available	0	71.6	Biosynthesis of secondary metabolites;Biosynthesis of alkaloids derived from shikimate pathway;Indole alkaloid biosynthesis	Biosynthesis of secondary metabolites;Biosynthesis of alkaloids derived from shikimate pathway;Indole alkaloid biosynthesis	2.1341	2.0563	0.02604	0.33	3.4833	3.401	3.4289	3.4318	3.8099	4.784	4.8373	4.0584	3.4225	4.1541
pos_5722	Ecgonine	metab_5199	yes	C10858	pos	481-37-8	186.112	4.80107	M+H	C9H15NO3	0	41.8	HMDB0006548	-	-	map00960	Metabolism	Biosynthesis of other secondary metabolites	Alkaloids and derivatives	Tropane alkaloids	Not Available	0	41.8	Tropane, piperidine and pyridine alkaloid biosynthesis	Tropane, piperidine and pyridine alkaloid biosynthesis	1.2323	1.1833	0.003011	0.1624	5.9705	5.869	5.7595	5.8853	5.9502	5.6424	5.6914	5.7202	5.772	5.5913
neg_5582	Senecionine N-oxide	metab_12829	yes	C15612	neg	-	372.142	4.95127	M+Na-2H	C18H25NO6	0	57	HMDB0258230	-	-	map00960	Metabolism	Biosynthesis of other secondary metabolites	Alkaloids and derivatives	Not Available	Not Available	0	57	Tropane, piperidine and pyridine alkaloid biosynthesis	Tropane, piperidine and pyridine alkaloid biosynthesis	1.4392	1.404	0.04592	0.266	4.6978	4.6589	5.4542	5.2542	4.6844	4.3383	4.3426	4.1179	4.84	4.6292
neg_6021	4-Hydroxy-4-(3-pyridyl)-butanoic acid	metab_13316	yes	C19579	neg	15569-97-8	361.14	4.28907	2M-H	C9H11NO3	0	61	HMDB0001119	-	-	map05204;map00980	Human Diseases;Metabolism	Cancer: overview;Xenobiotics biodegradation and metabolism	Organoheterocyclic compounds	Pyridines and derivatives	Not Available	0	61	Chemical carcinogenesis - DNA adducts;Metabolism of xenobiotics by cytochrome P450	Chemical carcinogenesis - DNA adducts;Metabolism of xenobiotics by cytochrome P450	3.055	2.9593	0.0003313	0.085	4.9437	4.9517	5.3343	5.2878	5.1856	3.5099	2.9778	3.256	3.7673	4.4217
pos_1604	Nebularine	metab_672	yes	C01736	pos	550-33-4	270.119	0.898817	M+NH4, 2M+ACN+Na	C10H12N4O4	0	43.2	HMDB0029956	-	-	-	-	-	Nucleosides, nucleotides, and analogues	Purine nucleosides	Not Available	0	43.2	-	-	1.8274	1.8108	0.03582	0.3676	5.5133	5.1551	5.4653	4.4241	4.7166	4.1223	4.3517	4.6721	4.6844	4.4597
pos_2521	Austdiol	metab_1682	yes	-	pos	53043-28-0	254.102	3.65708	M+NH4	C12H12O5	0	66.1	HMDB0030858	-	-	-	-	-	Organoheterocyclic compounds	Azaphilones	Not Available	0	66.1	-	-	2.1748	2.0718	0.0118	0.2594	4.3514	4.9689	4.755	4.5841	4.7349	3.3781	4.1289	3.8177	4.4044	4.2641
pos_2591	Niazidin	metab_1759	yes	-	pos	198969-42-5	387.122	3.82597	M+CH3OH+H	C15H18N2O6S	0	36.7	HMDB0031981	-	-	-	-	-	Not Available	Not Available	Not Available	0	36.7	-	-	1.5755	1.5331	0.01386	0.2672	4.9677	5.1884	5.5697	5.0325	5.2795	4.7468	5.0566	4.8189	4.7649	4.7482
pos_2829	Desaminotyrosine	metab_2019	yes	C01744	pos	501-97-3	184.097	4.43918	M+NH4	C9H10O3	0	56.3	HMDB0002199	-	-	-	-	-	Phenylpropanoids and polyketides	Phenylpropanoic acids	Not Available	0	56.3	-	-	1.3881	1.3506	0.02268	0.3165	6.4819	6.2124	6.0587	6.134	6.0421	6.0383	5.6252	5.7606	5.975	5.9635
pos_3086	Marshrin	metab_2304	yes	-	pos	-	308.112	5.24977	M+NH4	C15H14O6	0	58.6	HMDB0033783	-	-	-	-	-	Phenylpropanoids and polyketides	Coumarins and derivatives	Not Available	0	58.6	-	-	1.7049	1.6335	0.01861	0.2951	6.0127	5.6765	5.5199	5.6306	5.5265	5.4089	5.0153	4.8465	5.4673	5.381
pos_3094	N6-phenylisopropyladenosine	metab_2313	yes	-	pos	-	449.192	5.25775	M+ACN+Na	C19H23N5O4	0	80.8	HMDB0255302	-	-	-	-	-	Nucleosides, nucleotides, and analogues	Purine nucleosides	Not Available	0	80.8	-	-	2.1523	2.0845	0.03117	0.3511	5.5579	5.1604	4.9534	5.0183	4.9947	4.7279	3.719	3.6826	4.8168	4.8901
pos_3107	HOMATROPINE	metab_2328	yes	C07814	pos	87-00-3	293.186	5.30577	M+NH4	C16H21NO3	0	54.9	HMDB0253199	-	-	-	-	-	Alkaloids and derivatives	Tropane alkaloids	Not Available	0	54.9	-	-	1.5284	1.4851	0.02764	0.3339	5.0419	5.4063	5.728	5.3449	5.5768	4.956	5.3369	5.062	4.9864	4.8502
pos_3486	Neocnidilide	metab_2742	yes	C17002	pos	4567-33-3	195.138	6.25773	M+H	C12H18O2	55.8	0	HMDB0034450	-	-	-	-	-	Organoheterocyclic compounds	Isobenzofurans	Not Available	55.8	0	-	-	1.5017	1.413	0.02058	0.3059	5.7299	5.7186	5.5661	5.3812	5.9345	5.9593	6.1099	6.2315	5.899	5.8261
pos_4893	Deoxycholylcysteine	metab_4287	yes	-	pos	-	478.299	6.13907	M+H-H2O	C27H45NO5S	0	40.7	HMDB0242415	-	-	-	-	-	Not Available	Not Available	Not Available	0	40.7	-	-	1.7427	1.633	0.02174	0.3146	6.0393	5.9363	6.4399	6.6636	5.9266	5.6386	5.7837	5.6948	5.968	5.6247
pos_5234	Furathiocarb	metab_4663	yes	C18650	pos	65907-30-4	424.187	5.80398	M+ACN+H	C18H26N2O5S	0	51.7	HMDB0252533	-	-	-	-	-	Organoheterocyclic compounds	Coumarans	Not Available	0	51.7	-	-	2.5981	2.4639	0.03017	0.3468	3.4185	3.6536	4.6918	3.6347	5.2824	5.2911	5.5785	5.5161	4.4741	5.2431
pos_5441	1-Tert-butyl 4-ethyl 5-oxoazepane-1,4-dicarboxylate	metab_4892	yes	-	pos	-	303.191	5.3544	M+NH4	C14H23NO5	0	43.3	HMDB0244604	-	-	-	-	-	Organoheterocyclic compounds	Azepanes	Not Available	0	43.3	-	-	1.8431	1.8108	0.004567	0.1871	3.9066	3.39	3.4179	3.774	3.5248	4.0508	4.3576	3.9262	4.1547	3.9915
pos_5450	Tenuazonic acid	metab_4902	yes	C08511	pos	27778-66-1;610-88-8	180.102	5.34577	M+H-H2O	C10H15NO3	0	60.1	HMDB0036074	-	-	-	-	-	Organoheterocyclic compounds	Pyrrolines	Not Available	0	60.1	-	-	1.0827	1.0673	0.03726	0.37	6.2365	6.4835	6.5287	6.3597	6.4844	6.2753	6.3442	6.2374	5.9882	6.2413
pos_5484	PS(20:4(5Z,8Z,11Z,14Z)-OH(16R)/22:4(7Z,10Z,13Z,16Z))	metab_4937	yes	-	pos	-	460.753	5.28178	M+2Na	C48H78NO11P	0	72.7	HMDB0283203	-	-	-	-	-	Not Available	Not Available	Not Available	0	72.7	-	-	2.231	2.1279	0.04253	0.3869	2.4005	3.6231	3.8663	2.4447	2.5485	3.6142	3.8623	3.7134	4.2244	3.5508
pos_5583	(2E)-Piperamide-C5:1	metab_5046	yes	-	pos	117137-65-2	291.17	5.08175	M+NH4	C16H19NO3	0	41.1	HMDB0038834	-	-	-	-	-	Organoheterocyclic compounds	Benzodioxoles	Not Available	0	41.1	-	-	1.1291	1.0992	0.03435	0.3644	5.579	5.7375	5.9267	5.737	5.9212	5.5876	5.7248	5.5578	5.397	5.5696
pos_5693	N-(8-Amino-1-carboxyoctyl)-alanyl-proline	metab_5166	yes	-	pos	-	399.26	4.84907	M+ACN+H	C17H31N3O5	0	50.7	HMDB0247737	-	-	-	-	-	Nucleosides, nucleotides, and analogues	Purine nucleosides	Not Available	0	50.7	-	-	1.294	1.2483	0.001559	0.1239	6.062	5.9533	6.1028	6.0093	5.8785	6.2141	6.3211	6.183	6.1827	6.2116
pos_5813	DG(15:0/0:0/TXB2)	metab_5299	yes	-	pos	-	357.235	4.59172	M+2Na	C38H68O9	0	44.5	HMDB0295269	-	-	-	-	-	Not Available	Not Available	Not Available	0	44.5	-	-	2.3948	2.3001	4.669e-06	0.001978	5.2607	5.0842	5.2412	5.2093	5.4153	5.8476	6.0045	5.9544	5.8436	5.894
pos_5892	2,2-Dimethyl-5-hydroxy-1-pyrrolidinyloxy	metab_5386	yes	-	pos	-	96.0813	4.43918	M+H-2H2O	C6H13NO2	0	64.7	HMDB0247851	-	-	-	-	-	Organoheterocyclic compounds	Pyrrolidines	Not Available	0	64.7	-	-	1.5911	1.505	0.01998	0.3021	4.2822	4.1949	4.1738	4.0955	3.7577	3.6522	3.7543	3.3849	3.8458	3.9485
pos_7029	3-Deazaadenosine	metab_6645	yes	C01736	pos	550-33-4	289.092	2.77982	M+Na	C11H14N4O4	0	53.8	HMDB0245849;HMDB0029956	-	-	-	-	-	Nucleosides, nucleotides, and analogues	Imidazole[4,5-c]pyridine ribonucleosides and ribonucleotides	Not Available	0	53.8	-	-	2.4151	2.3049	0.02798	0.3359	4.6428	5.1113	5.3744	4.2577	3.7532	4.9558	6.0528	5.711	5.7949	5.3065
neg_1778	2-Methyl-2H-1,3-benzoxazin-4(3H)-one	metab_8619	yes	-	neg	-	162.055	3.76948	M-H	C9H9NO2	0	41.1	HMDB0249616	-	-	-	-	-	Organoheterocyclic compounds	Benzoxazines	Not Available	0	41.1	-	-	1.4151	1.3301	0.03983	0.266	4.3265	4.7117	4.2492	4.449	5.035	3.7756	4.0514	4.1155	4.2973	4.3631
neg_2523	Prehumulinic acid	metab_9444	yes	-	neg	-	301.14	4.95913	M+Na-2H	C16H24O4	0	39.9	HMDB0030148	-	-	-	-	-	Organic acids and derivatives	Vinylogous acids	Not Available	0	39.9	-	-	1.381	1.3543	0.01094	0.1942	5.7861	5.9323	6.1817	5.5788	5.9984	5.3896	5.506	5.5417	5.7128	5.3724
neg_2659	Decarbamoylneosaxitoxin	metab_9594	yes	-	neg	68683-58-9	317.124	5.1912	M+FA-H	C9H16N6O4	0	32.6	HMDB0033663	-	-	-	-	-	Phenylpropanoids and polyketides	Saxitoxins, gonyautoxins, and derivatives	Not Available	0	32.6	-	-	2.7731	2.7286	0.0009185	0.1111	5.8018	5.8045	5.5117	5.9321	5.9589	3.8905	5.1729	4.8757	4.2756	3.9259
neg_2981	Combretastatin A4	metab_9949	yes	C20268	neg	117048-59-6	315.124	5.7857	M-H	C18H20O5	0	38.6	HMDB0250413;HMDB0253622	-	-	-	-	-	Phenylpropanoids and polyketides	Stilbenes	Not Available	0	38.6	-	-	1.3952	1.3907	0.01495	0.1981	5.8859	5.6576	5.7694	6.0255	5.4684	5.3112	5.5222	5.1536	5.1321	5.6049
neg_334	8,9-Dihydroxy-1,5,6,10B-tetrahydropyrrolo[2,1-A]isoquinolin-3(2H)-one	metab_10346	yes	-	neg	-	264.088	5.29868	M-H, M+FA-H	C12H13NO3	0	47.6	HMDB0247472	-	-	-	-	-	Organoheterocyclic compounds	Tetrahydroisoquinolines	Not Available	0	47.6	-	-	1.6091	1.5599	0.04831	0.266	4.4447	4.6299	4.9301	5.2988	4.6833	3.9565	4.4894	3.5506	4.7787	4.2052
neg_3364	N-Eicosapentaenoyl Tryptophan	metab_10373	yes	-	neg	-	523.273	6.37492	M+Cl	C31H40N2O3	0	57.4	HMDB0242081	-	-	-	-	-	Not Available	Not Available	Not Available	0	57.4	-	-	2.2539	2.2511	0.01639	0.2067	5.3191	5.5301	3.6078	5.2911	4.6171	6.1727	5.7626	5.8734	5.8203	6.2786
neg_3940	Methoxymorpholinyldoxorubicin	metab_11009	yes	-	neg	-	678.195	7.60143	M+Cl	C32H37NO13	0	81.8	HMDB0254553	-	-	-	-	-	Phenylpropanoids and polyketides	Anthracyclines	Not Available	0	81.8	-	-	1.6501	1.646	0.01196	0.1942	5.4265	5.3143	4.9595	4.6454	4.6274	4.1981	4.5622	4.5336	4.4641	4.3188
neg_4356	Bafilomycin A1(Baf-A1)	metab_11470	yes	-	neg	-	621.401	6.54675	M-H	C35H58O9	0	38.9	HMDB0247559	-	-	-	-	-	Phenylpropanoids and polyketides	Macrolides and analogues	Not Available	0	38.9	-	-	1.8424	1.8131	0.005164	0.1744	8.0341	8.0846	7.5455	7.7572	7.3224	7.3408	6.7968	7.0662	7.2057	7.0911
neg_4621	Deoxycholylalanine	metab_11765	yes	-	neg	-	508.328	6.18057	M+FA-H	C27H45NO5	0	73.6	HMDB0242412	-	-	-	-	-	Not Available	Not Available	Not Available	0	73.6	-	-	3.5054	3.441	0.001694	0.1223	5.663	5.3152	5.4329	5.9499	4.3615	2.4758	2.839	2.8105	2.7411	4.6945
neg_496	DG(i-18:0/0:0/LTE4)	metab_12138	yes	-	neg	-	760.519	7.28845	M-H2O-H, M-H	C44H77NO8S	0	37.7	HMDB0299626	-	-	-	-	-	Not Available	Not Available	Not Available	0	37.7	-	-	2.1246	1.9908	0.02168	0.2224	6.0106	6.1672	5.4703	6.6977	6.9323	4.8598	5.2239	5.1953	5.9138	5.5942
neg_5115	(1xi,3xi)-1,2,3,4-Tetrahydro-1-methyl-beta-carboline-3-carboxylic acid	metab_12312	yes	-	neg	124863-39-4	275.104	5.65393	M+FA-H	C13H14N2O2	0	42.7	HMDB0031819;HMDB0037942	-	-	-	-	-	Alkaloids and derivatives	Harmala alkaloids	Not Available	0	42.7	-	-	2.0261	2.0088	0.003863	0.1624	4.8156	4.9748	5.0289	5.1468	4.5128	4.5071	3.7626	3.8689	3.9899	4.4942
neg_5482	Quinocarmycin analog	metab_12718	yes	-	neg	-	392.138	5.10147	M+Cl	C19H23N3O4	0	53	HMDB0251647	-	-	-	-	-	Organoheterocyclic compounds	Tetrahydroisoquinolines	Not Available	0	53	-	-	1.9976	2.0511	0.04693	0.266	5.6159	5.9024	5.4616	3.8046	4.8596	3.9216	4.5429	4.7313	3.8117	3.4673
neg_5977	Decarbamoylsaxitoxin	metab_13265	yes	C20021	neg	58911-04-9	571.274	4.35957	2M+Hac-H	C9H16N6O3	0	62	HMDB0038319	-	-	-	-	-	Phenylpropanoids and polyketides	Saxitoxins, gonyautoxins, and derivatives	Not Available	0	62	-	-	1.0361	0.9914	0.04908	0.266	3.9728	3.7918	3.7952	3.9263	4.2502	3.479	3.8431	3.8145	3.745	3.5997
neg_6012	3,6-Ditigloyloxytropan-7-ol	metab_13306	yes	-	neg	7159-86-6	358.162	4.31257	M+Na-2H	C18H27NO5	0	31.9	HMDB0029325	-	-	-	-	-	Alkaloids and derivatives	Tropane alkaloids	Not Available	0	31.9	-	-	1.4539	1.4092	0.02056	0.2186	3.4086	4.0594	3.8399	3.5919	4.1614	3.1447	3.5086	3.4801	3.4106	3.2654
neg_6038	3-(1,2,5,6-Tetrahydropyrid-4-yl)pyrrolo(3,2-b)pyrid-5-one	metab_13334	yes	-	neg	-	260.104	4.26557	M+FA-H	C12H13N3O	0	30.8	HMDB0250504	-	-	-	-	-	Organoheterocyclic compounds	Pyrrolopyridines	Not Available	0	30.8	-	-	1.4682	1.4124	0.02828	0.2363	5.0871	5.7601	5.45	5.2467	5.7593	4.6887	4.7896	5.1673	5.2613	5.0699
neg_6114	Tripdiolide	metab_13419	yes	C09202	neg	38647-10-8	413.102	4.17083	M+K-2H	C20H24O7	0	50.6	HMDB0259259	-	-	-	-	-	Organoheterocyclic compounds	Oxepanes	Not Available	0	50.6	-	-	1.4557	1.43	0.01125	0.1942	6.2689	6.1218	6.5162	6.438	6.3931	5.4954	6.0233	5.9802	6.161	5.9157
neg_6246	5alpha-Hydroxytriptolide	metab_13562	yes	-	neg	-	413.102	4.02917	M+K-2H	C20H24O7	0	52.6	HMDB0247016	-	-	-	-	-	Organoheterocyclic compounds	Oxepanes	Not Available	0	52.6	-	-	1.6671	1.6317	0.01398	0.1961	5.5183	5.255	5.735	5.5694	5.4325	4.4241	4.9784	4.8293	5.4496	4.973
neg_6865	7-Acetyllycopsamine	metab_14247	yes	C16751	neg	-	378.134	3.39097	M+K-2H	C17H27NO6	0	42.8	HMDB0302356	-	-	-	-	-	Alkaloids and derivatives	Not Available	Not Available	0	42.8	-	-	1.5234	1.4758	0.03542	0.2568	4.049	4.6439	4.6966	4.5077	5.1916	4.0955	4.1995	4.3142	4.122	3.7256
neg_6970	7-Methylguanosine	metab_14364	yes	-	neg	2140-77-4;20244-86-4	335.065	3.30417	M+K-2H	C11H16N5O5+	0	30.6	HMDB0001107;HMDB0005862	-	-	-	-	-	Nucleosides, nucleotides, and analogues	Purine nucleosides	Not Available	0	30.6	-	-	1.4155	1.4504	0.01433	0.1966	5.2246	5.2134	5.3636	5.3276	5.6716	5.0913	5.1577	4.9908	4.5507	4.9113
neg_7142	Queuosine	metab_14555	yes	-	neg	57072-36-3	390.145	2.9361	M-H2O-H	C17H23N5O7	0	58.1	HMDB0011596	-	-	-	-	-	Nucleosides, nucleotides, and analogues	Pyrrolopyrimidine nucleosides and nucleotides	Not Available	0	58.1	-	-	3.4901	3.3663	0.01109	0.1942	1.3169	1.3635	4.9256	1.4929	3.4384	4.7185	4.9582	5.3004	4.8364	4.7384
pos_1323	Stallimycin	metab_360	yes	-	pos	-	482.228	6.06733	M+H-H2O, M+H	C22H27N9O4	0	56.5	HMDB0251483	-	-	-	-	-	Organic nitrogen compounds	Organonitrogen compounds	N-arylamides	0	56.5	-	-	1.5915	1.521	0.03659	0.3696	6.7005	6.5965	6.3903	6.5774	6.3529	6.406	5.9066	5.6285	6.1306	6.4471
pos_159	Acetylshikonin	metab_655	yes	C17413	pos	24502-78-1	348.144	5.65148	M+NH4, M+Na, M+H-2H2O	C18H18O6	0	50.8	HMDB0247936	-	-	-	-	-	Benzenoids	Naphthalenes	Naphthoquinones	0	50.8	-	-	2.1219	1.9608	0.04026	0.3808	5.6899	5.3563	5.8505	5.7713	5.2995	4.048	5.3205	4.8326	4.6009	5.5862
neg_2071	7-Amino-4-hydroxy-2-naphthalenesulfonic acid	metab_8945	yes	-	neg	-	284.023	4.15515	M+FA-H	C10H9NO4S	0	49.4	HMDB0243485	-	-	-	-	-	Benzenoids	Naphthalenes	Naphthalene sulfonic acids and derivatives	0	49.4	-	-	1.9678	1.9256	0.00307	0.151	4.9458	5.0082	5.2434	5.0593	5.275	3.799	4.5203	4.6229	4.6778	4.3031
neg_6874	5-Hydroxy-1-methylpyrrolidin-2-one	metab_14257	yes	-	neg	-	229.119	3.38312	2M-H	C5H9NO2	0	32.2	HMDB0246801	-	-	-	-	-	Organoheterocyclic compounds	Pyrrolidines	N-alkylpyrrolidines	0	32.2	-	-	2.8746	2.743	0.000828	0.1111	5.3017	5.7434	4.8671	6.1923	5.603	4.3141	3.9113	3.7291	4.5512	4.2821
pos_5483	Coumaperine	metab_4936	yes	-	pos	76733-91-0	275.175	5.28977	M+NH4	C16H19NO2	0	42.6	HMDB0039125	-	-	-	-	-	Organoheterocyclic compounds	Piperidines	N-acylpiperidines	0	42.6	-	-	2.3678	2.2636	0.009888	0.2485	3.7646	4.4536	4.8039	4.4205	4.4423	3.9573	3.7844	2.9566	3.695	3.395
neg_3107	11b-Hydroxyandrost-4-ene-3,17-dione	metab_15360	yes	C05284	neg	382-44-5	347.186	5.93142	M+FA-H	C19H26O3	0	77.3	PW_C002924;HMDB0006773	-	-	map00140	Metabolism	Lipid metabolism	Organoheterocyclic compounds	Oxazinanes	Morpholines	0	77.3	Steroid hormone biosynthesis	Steroid hormone biosynthesis	2.0396	1.9898	0.01323	0.1942	5.904	6.0108	6.1831	6.5906	5.2595	5.3	5.0797	4.5243	5.3342	5.4223
pos_6515	Phenmetrazine	metab_6077	yes	C07432	pos	134-49-6	195.149	3.40807	M+NH4	C11H15NO	36	0	HMDB0014968	-	-	-	-	-	Organoheterocyclic compounds	Oxazinanes	Morpholines	36	0	-	-	1.8211	1.7458	0.04636	0.396	4.8216	4.9309	4.8923	5.1014	4.3595	4.5604	4.0826	3.5367	4.648	4.4616
pos_4566	(S)-(-)-Perillyl alcohol	metab_3929	yes	C02452	pos	536-59-4	135.117	6.54405	M+H-H2O	C10H16O	71.8	0	HMDB0003634	-	-	map01110;map00903;map00902	Metabolism;Metabolism;Metabolism	Global and overview maps;Metabolism of terpenoids and polyketides;Metabolism of terpenoids and polyketides	Lipids and lipid-like molecules	Prenol lipids	Monoterpenoids	71.8	0	Biosynthesis of secondary metabolites;Limonene and pinene degradation;Monoterpenoid biosynthesis	Biosynthesis of secondary metabolites;Limonene and pinene degradation;Monoterpenoid biosynthesis	1.355	1.2757	0.03275	0.3577	5.6672	5.6157	5.2961	5.2968	5.4567	5.9729	5.7171	5.8415	5.4766	5.7795
pos_3300	Kahweol	metab_2540	yes	C09893	pos	6894-43-5	315.195	5.8918	M+H	C20H26O3	48.7	0	HMDB0035602	-	-	map01110;map00902	Metabolism;Metabolism	Global and overview maps;Metabolism of terpenoids and polyketides	Lipids and lipid-like molecules	Prenol lipids	Monoterpenoids	48.7	0	Biosynthesis of secondary metabolites;Monoterpenoid biosynthesis	Biosynthesis of secondary metabolites;Monoterpenoid biosynthesis	1.7129	1.6179	0.001759	0.1318	5.4392	5.5396	5.333	5.417	5.1976	5.0432	5.1509	4.8026	4.9883	5.0653
pos_4619	Dolichodial	metab_3987	yes	C09777	pos	5951-57-5	149.096	6.46443	M+H-H2O	C10H14O2	0	42.7	HMDB0251578;LMPR0102070037	-	-	-	-	-	Lipids and lipid-like molecules	Prenol lipids	Monoterpenoids	0	42.7	-	-	1.1493	1.0957	0.02581	0.33	6.6918	6.6601	6.8775	6.8956	6.5334	6.6198	6.5267	6.4126	6.5463	6.5113
pos_4790	11,12,13-Trinor-1,3,5-bisabolatrien-10-oic acid	metab_4174	yes	-	pos	-	193.122	6.24985	M+H	C12H16O2	0	39.8	HMDB0039643	-	-	-	-	-	Lipids and lipid-like molecules	Prenol lipids	Monoterpenoids	0	39.8	-	-	1.521	1.4611	0.03078	0.3492	5.268	5.3775	4.9638	5.0941	5.605	5.5199	5.8242	5.9044	5.4656	5.4895
pos_3119	MG(0:0/22:5(7Z,10Z,13Z,16Z,19Z)/0:0)	metab_2341	yes	-	pos	-	443.254	5.32977	M+K	C25H40O4	0	47	LMGL01010037;HMDB0011556	-	-	-	-	-	Lipids and lipid-like molecules	Glycerolipids	Monoradylglycerols	0	47	-	-	2.0572	1.9279	0.005213	0.1919	5.3239	5.2629	4.8473	4.8216	5.157	5.6947	5.6282	5.9931	5.594	5.3335
neg_5498	Vanillylamine	metab_12735	yes	C16666	neg	1196-92-5	351.156	5.07988	2M+FA-H	C8H11NO2	0	31	HMDB0012309	-	-	map01100;map01063;map01110;map00998	Metabolism;Metabolism;Metabolism;Metabolism	Global and overview maps;Chemical structure transformation maps;Global and overview maps;Biosynthesis of other secondary metabolites	Benzenoids	Phenols	Methoxyphenols	0	31	Metabolic pathways;Biosynthesis of alkaloids derived from shikimate pathway;Biosynthesis of secondary metabolites;Biosynthesis of various secondary metabolites - part 2	Metabolic pathways;Biosynthesis of alkaloids derived from shikimate pathway;Biosynthesis of secondary metabolites;Biosynthesis of various secondary metabolites - part 2	1.5686	1.5195	0.00314	0.151	5.2917	5.1997	5.4588	5.3324	5.1084	4.8528	4.6981	4.5612	5.0663	4.9606
pos_5848	Gingerol	metab_5337	yes	C10462	pos	58253-27-3	339.155	4.52782	M+2Na-H	C17H26O4	0	39.6	HMDB0005783	-	-	map01110;map00945	Metabolism;Metabolism	Global and overview maps;Biosynthesis of other secondary metabolites	Benzenoids	Phenols	Methoxyphenols	0	39.6	Biosynthesis of secondary metabolites;Stilbenoid, diarylheptanoid and gingerol biosynthesis	Biosynthesis of secondary metabolites;Stilbenoid, diarylheptanoid and gingerol biosynthesis	1.2504	1.2228	0.03069	0.3492	5.1889	5.1618	5.0962	5.0653	4.881	5.0155	4.5974	4.6305	4.8706	4.9577
pos_3530	Eugenol	metab_2790	yes	C10453	pos	97-53-0	129.07	6.39285	M+H-2H2O	C10H12O2	0	64.1	HMDB0005809;MJDBOTE0000375	-	-	map00940	Metabolism	Biosynthesis of other secondary metabolites	Benzenoids	Phenols	Methoxyphenols	0	64.1	Phenylpropanoid biosynthesis	Phenylpropanoid biosynthesis	1.1518	1.0806	0.01251	0.2615	5.9196	5.961	5.8635	5.7633	6.058	6.1462	6.1591	6.1652	6.0181	6.0263
neg_6908	2-Methoxy-4-vinylphenol	metab_14295	yes	C17883	neg	7786-61-0	195.066	3.35175	M+FA-H	C9H10O2	0	64.6	HMDB0013744	-	-	-	-	-	Benzenoids	Phenols	Methoxyphenols	0	64.6	-	-	1.0187	1.0084	0.02808	0.2355	5.2332	5.133	5.2149	5.4958	4.9693	4.9071	5.0349	4.9276	4.9492	5.0299
pos_5886	Methoxamine	metab_5379	yes	C07513	pos	390-28-3	212.128	4.4552	M+H	C11H17NO3	41.3	0	HMDB0014861	-	-	-	-	-	Benzenoids	Benzene and substituted derivatives	Methoxybenzenes	41.3	0	-	-	1.9115	1.8149	0.04716	0.3985	6.7918	6.7649	6.7211	6.5058	5.7098	5.5959	5.8751	5.4195	6.1634	6.3324
neg_2267	2-Keto-6-acetamidocaproate	metab_9161	yes	C05548	neg	-	186.076	4.47915	M-H	C8H13NO4	0	30.5	HMDB0012150	-	-	map01100;map00310	Metabolism;Metabolism	Global and overview maps;Amino acid metabolism	Organic acids and derivatives	Keto acids and derivatives	Medium-chain keto acids and derivatives	0	30.5	Metabolic pathways;Lysine degradation	Metabolic pathways;Lysine degradation	1.5037	1.451	3.186e-05	0.02636	5.2669	5.2439	5.2541	5.3192	5.3065	4.8153	4.8541	4.91	5.0403	4.9729
neg_3241	Lovastatin acid	metab_10237	yes	C21130	neg	75225-51-3	403.249	6.14142	M-H2O-H	C24H38O6	0	74.4	HMDB0254177	-	-	map01100;map01110;map00999	Metabolism;Metabolism;Metabolism	Global and overview maps;Global and overview maps;Biosynthesis of other secondary metabolites	Organic acids and derivatives	Hydroxy acids and derivatives	Medium-chain hydroxy acids and derivatives	0	74.4	Metabolic pathways;Biosynthesis of secondary metabolites;Biosynthesis of various secondary metabolites - part 1	Metabolic pathways;Biosynthesis of secondary metabolites;Biosynthesis of various secondary metabolites - part 1	1.9057	1.8477	0.01635	0.2067	6.5498	6.8128	7.1235	7.386	6.4388	6.0988	6.2261	5.4994	6.591	6.1255
neg_2653	3-Hydroxysebacic Acid	metab_9588	yes	-	neg	446881-43-2	217.108	5.18383	M-H	C10H18O5	44.8	0	HMDB0000350	-	-	-	-	-	Organic acids and derivatives	Hydroxy acids and derivatives	Medium-chain hydroxy acids and derivatives	44.8	0	-	-	1.5967	1.5718	0.004834	0.173	6.1283	6.2195	5.8984	6.1385	5.9891	5.4004	6.0261	5.503	5.4225	5.5476
neg_4175	Alpha-Dimorphecolic acid	metab_11270	yes	C14767	neg	73543-67-6	591.463	6.9295	2M-H	C18H32O3	0	77.4	HMDB0004670;LMFA02000188	-	-	map00591;map03320	Metabolism;Organismal Systems	Lipid metabolism;Endocrine system	Lipids and lipid-like molecules	Fatty Acyls	Lineolic acids and derivatives	0	77.4	Linoleic acid metabolism;PPAR signaling pathway	Linoleic acid metabolism;PPAR signaling pathway	2.3509	2.2329	0.02264	0.2224	4.2641	5.1186	5.026	5.7327	6.6606	4	4.3641	4.3356	4.266	4.1207
neg_3349	13(S)-HpOTrE	metab_10356	yes	C04785	neg	67597-26-6	309.207	6.35145	M-H	C18H30O4	42.4	0	HMDB0301803	-	-	map01100;map00592;map01110	Metabolism;Metabolism;Metabolism	Global and overview maps;Lipid metabolism;Global and overview maps	Lipids and lipid-like molecules	Fatty Acyls	Lineolic acids and derivatives	42.4	0	Metabolic pathways;alpha-Linolenic acid metabolism;Biosynthesis of secondary metabolites	Metabolic pathways;alpha-Linolenic acid metabolism;Biosynthesis of secondary metabolites	1.6191	1.6063	0.03423	0.2519	5.8688	5.3207	6.2435	6.291	6.1261	4.7952	5.5658	5.7959	5.3278	5.2459
neg_6302	Demethoxycurcumin	metab_13625	yes	C17742	neg	22608-11-3	319.097	3.96585	M-H2O-H	C20H18O5	0	32.7	HMDB0033801	-	-	map01110;map00945	Metabolism;Metabolism	Global and overview maps;Biosynthesis of other secondary metabolites	Phenylpropanoids and polyketides	Diarylheptanoids	Linear diarylheptanoids	0	32.7	Biosynthesis of secondary metabolites;Stilbenoid, diarylheptanoid and gingerol biosynthesis	Biosynthesis of secondary metabolites;Stilbenoid, diarylheptanoid and gingerol biosynthesis	1.1929	1.1874	0.0371	0.262	5.3703	5.517	5.8973	5.1853	5.6327	4.9948	5.252	5.304	5.2987	5.0299
neg_2403	Indoleacetic acid	metab_9311	yes	C00954	neg	87-51-4	220.061	4.73097	M+FA-H	C10H9NO2	0	34.2	HMDB0000197;PW_C000128	-	-	map01100;map01070;map00380;map04075	Metabolism;Metabolism;Metabolism;Environmental Information Processing	Global and overview maps;Chemical structure transformation maps;Amino acid metabolism;Signal transduction	Organoheterocyclic compounds	Indoles and derivatives	Indolyl carboxylic acids and derivatives	0	34.2	Metabolic pathways;Biosynthesis of plant hormones;Tryptophan metabolism;Plant hormone signal transduction	Metabolic pathways;Biosynthesis of plant hormones;Tryptophan metabolism;Plant hormone signal transduction	1.0964	1.0956	0.01801	0.2112	4.9599	5.0463	5.1347	5.1959	5.0086	4.5505	5.0217	4.8096	4.8868	4.7654
pos_5466	5-Methoxyindoleacetate	metab_4917	yes	C05660	pos	3471-31-6	206.081	5.31377	M+H	C11H11NO3	0	74.8	HMDB0004096;PW_C002060	-	-	map00380	Metabolism	Amino acid metabolism	Organoheterocyclic compounds	Indoles and derivatives	Indolyl carboxylic acids and derivatives	0	74.8	Tryptophan metabolism	Tryptophan metabolism	1.263	1.2203	0.01341	0.2651	5.0532	4.7533	4.7628	4.8524	5.1004	4.6426	4.7019	4.6852	4.6983	4.6078
neg_5219	Indolelactic acid	metab_12427	yes	C02043	neg	7417-65-4	204.066	5.4947	M-H	C11H11NO3	95.4	0	HMDB0000671	-	-	-	-	-	Organoheterocyclic compounds	Indoles and derivatives	Indolyl carboxylic acids and derivatives	95.4	0	-	-	1.9449	1.864	0.007991	0.192	5.3796	6.1636	5.7476	5.5487	5.5339	4.959	4.7142	4.5154	5.3583	5.2147
pos_5507	3-Methyldioxyindole	metab_4962	yes	C05834	pos	3040-34-4	196.097	5.24177	M+CH3OH+H	C9H9NO2	0	46.6	HMDB0004186	-	-	map00380	Metabolism	Amino acid metabolism	Organoheterocyclic compounds	Indoles and derivatives	Indolines	0	46.6	Tryptophan metabolism	Tryptophan metabolism	1.0824	1.0259	0.01156	0.2594	5.0853	5.0231	5.0424	5.0445	5.093	4.9061	4.9114	4.7043	5.0076	4.9173
neg_1378	N-hydroxyl-tryptamine	metab_8176	yes	C17203	neg	-	221.093	3.29633	M+FA-H	C10H12N2O	0	30.9	HMDB0255154	-	-	map01100;map00380	Metabolism;Metabolism	Global and overview maps;Amino acid metabolism	Organoheterocyclic compounds	Indoles and derivatives	Indoles	0	30.9	Metabolic pathways;Tryptophan metabolism	Metabolic pathways;Tryptophan metabolism	1.6008	1.5619	0.04347	0.266	4.3703	5.0621	4.7431	3.9616	4.6469	3.5293	3.6205	4.2179	4.4342	3.9531
pos_2669	1H-Indol-3-amine	metab_1843	yes	C01819	pos	-	165.102	4.01132	M+CH3OH+H	C8H8N2	0	35.1	HMDB0244887	-	-	-	-	-	Organoheterocyclic compounds	Indoles and derivatives	Indoles	0	35.1	-	-	1.3149	1.2594	0.01936	0.299	4.9897	4.8136	4.5936	4.7496	4.6902	4.6632	4.3978	4.3092	4.5445	4.5784
neg_5199	Cypridina luciferin	metab_12404	yes	C02825	neg	7273-34-9	440.195	5.51822	M+Cl	C22H27N7O	0	35.3	HMDB0250695	-	-	-	-	-	Organoheterocyclic compounds	Indoles and derivatives	Indoles	0	35.3	-	-	2.7984	2.7593	0.01098	0.1942	3.1449	3.1936	3.197	3.328	4.6454	4.1256	5.8734	6.0755	4.777	4.5322
pos_4683	17a,20a-Dihydroxycholesterol	metab_7695	yes	C05487	pos	-	383.33	6.36112	M+H-2H2O	C27H46O3	0	68.3	HMDB0006764;PW_C002916	-	-	map00140	Metabolism	Lipid metabolism	Lipids and lipid-like molecules	Steroids and steroid derivatives	Hydroxysteroids	0	68.3	Steroid hormone biosynthesis	Steroid hormone biosynthesis	1.9904	1.9	0.0004491	0.05677	5.6701	5.462	5.7255	5.6871	5.5942	6.2365	6.1014	6.2344	5.8471	6.1758
neg_3240	Cortolone	metab_10236	yes	C05481	neg	516-42-7	365.233	6.14142	M-H	C21H34O5	0	68.6	LMST02030227;HMDB0003128	-	-	map00140	Metabolism	Lipid metabolism	Lipids and lipid-like molecules	Steroids and steroid derivatives	Hydroxysteroids	0	68.6	Steroid hormone biosynthesis	Steroid hormone biosynthesis	1.4656	1.4333	0.01862	0.2136	6.4492	6.3364	5.8312	5.87	5.7269	6.6057	6.3507	6.3913	6.5446	6.6175
neg_5423	5-Hydroxyindoleacetaldehyde	metab_12653	yes	C05634	neg	1892-21-3	220.061	5.1912	M+FA-H	C10H9NO2	0	50.5	PW_C002047;HMDB0004073	-	-	map01100;map00380	Metabolism;Metabolism	Global and overview maps;Amino acid metabolism	Organoheterocyclic compounds	Indoles and derivatives	Hydroxyindoles	0	50.5	Metabolic pathways;Tryptophan metabolism	Metabolic pathways;Tryptophan metabolism	1.1908	1.149	0.01366	0.195	5.3889	4.9746	4.9933	5.3325	5.106	4.8087	4.8227	4.8645	4.9675	4.9068
neg_5829	7-Hydroxy-5-methoxy-4-methyl-3-(4-methylpiperazin-1-yl)-2H-chromen-2-one	metab_13102	yes	-	neg	-	349.141	4.5596	M+FA-H	C16H20N2O4	0	34.1	HMDB0244641	-	-	-	-	-	Phenylpropanoids and polyketides	Coumarins and derivatives	Hydroxycoumarins	0	34.1	-	-	1.1956	1.1866	0.01944	0.215	5.486	5.5118	5.7494	5.6721	5.21	5.1901	5.1569	5.0699	5.2186	5.4105
neg_6041	Ferulic Acid	metab_13338	yes	C01494	neg	537-98-4	193.05	4.26557	M-H	C10H10O4	98.6	0	HMDB0000954;MJDBOTE0000325	-	-	map01100;map00940;map01110;map01061	Metabolism;Metabolism;Metabolism;Metabolism	Global and overview maps;Biosynthesis of other secondary metabolites;Global and overview maps;Chemical structure transformation maps	Phenylpropanoids and polyketides	Cinnamic acids and derivatives	Hydroxycinnamic acids and derivatives	98.6	0	Metabolic pathways;Phenylpropanoid biosynthesis;Biosynthesis of secondary metabolites;Biosynthesis of phenylpropanoids	Metabolic pathways;Phenylpropanoid biosynthesis;Biosynthesis of secondary metabolites;Biosynthesis of phenylpropanoids	1.259	1.2649	0.02146	0.222	3.0516	3.328	3.4925	3.1442	2.9648	2.5362	2.8996	2.8711	2.8016	3.0533
neg_2855	Dimethyl-3-hydroxypyrid-4-one	metab_9811	yes	-	neg	-	120.044	5.51822	M-H2O-H	C7H9NO2	0	59	HMDB0251390	-	-	-	-	-	Organoheterocyclic compounds	Pyridines and derivatives	Hydropyridines	0	59	-	-	1.6024	1.5052	0.04595	0.266	3.9586	4.1815	3.9442	4.0851	4.7359	3.5635	2.8885	3.9067	3.9473	3.7492
neg_3476	Gymnodimine	metab_10496	yes	C20025	neg	173792-58-0	552.336	6.57805	M+FA-H	C32H45NO4	0	64.2	HMDB0041430	-	-	-	-	-	Organoheterocyclic compounds	Pyridines and derivatives	Hydropyridines	0	64.2	-	-	1.2161	1.1812	0.03796	0.2646	7.5714	7.5833	7.0475	7.5616	7.1739	6.8721	6.9446	7.2294	7.2252	6.9625
neg_1665	L-beta-aspartyl-L-leucine	metab_8494	yes	-	neg	-	227.103	3.62713	M-H2O-H	C10H18N2O5	0	51.5	HMDB0011166	-	-	-	-	-	Organic acids and derivatives	Peptidomimetics	Hybrid peptides	0	51.5	-	-	1.0317	0.9968	0.007599	0.1889	5.0631	5.117	5.1658	5.2358	5.2441	4.8236	4.9536	4.9933	5.1062	4.9332
neg_1767	L-beta-aspartyl-L-threonine	metab_8607	yes	-	neg	-	279.084	3.75317	M+FA-H	C8H14N2O6	0	44.5	HMDB0011169	-	-	-	-	-	Organic acids and derivatives	Peptidomimetics	Hybrid peptides	0	44.5	-	-	1.8125	1.7425	0.002144	0.1294	5.3451	5.1169	5.2261	5.5372	5.4732	4.409	4.9204	4.6126	4.9181	4.9266
neg_2788	P-Hydroxyubenimex	metab_9736	yes	-	neg	-	305.151	5.39572	M-H2O-H	C16H24N2O5	0	42.3	HMDB0255924	-	-	-	-	-	Organic acids and derivatives	Peptidomimetics	Hybrid peptides	0	42.3	-	-	1.321	1.2895	0.01064	0.1942	5.7736	5.6324	5.6679	5.8118	5.4516	5.4856	5.167	5.0842	5.3961	5.478
pos_5550	Triticonazole	metab_5010	yes	C18815	pos	131983-72-7	350.163	5.13775	M+CH3OH+H	C17H20ClN3O	0	38.7	HMDB0259283	-	-	-	-	-	Benzenoids	Benzene and substituted derivatives	Halobenzenes	0	38.7	-	-	2.5613	2.4887	0.0182	0.2948	4.7306	5.1798	4.4964	3.3785	4.2012	3.5769	3.8577	2.7908	3.1176	3.4235
pos_4513	Gingerglycolipid B	metab_3871	yes	-	pos	88168-90-5	701.371	6.59972	M+Na	C33H58O14	0	76	HMDB0041094	-	-	-	-	-	Lipids and lipid-like molecules	Glycerolipids	Glycosylglycerols	0	76	-	-	2.0848	2.0861	0.04678	0.3975	5.684	5.5559	6.3765	4.5373	4.6413	4.4284	4.6578	4.6213	4.528	4.4867
pos_5867	Saringosterol 3-glucoside	metab_5358	yes	-	pos	-	318.196	4.4872	M+2Na	C35H58O7	0	33.1	HMDB0029767	-	-	-	-	-	Lipids and lipid-like molecules	Glycerolipids	Glycosylglycerols	0	33.1	-	-	2.5168	2.405	0.0001532	0.02597	4.2417	4.0902	4.2509	4.0162	4.6395	4.9937	5.1098	5.0403	4.8801	5.0377
pos_984	Hexosylsphingosine	metab_7677	yes	-	pos	-	519.365	7.05227	M+K, M+ACN+H	C24H47NO8	0	36.5	HMDB0253164	-	-	-	-	-	Lipids and lipid-like molecules	Sphingolipids	Glycosphingolipids	0	36.5	-	-	1.2255	1.1273	0.02633	0.33	5.9826	5.9216	6.0197	6.0436	5.8703	5.6133	5.8999	5.5263	5.78	5.9014
neg_3775	1b,3a,7b-Trihydroxy-5b-cholanoic acid	metab_10826	yes	-	neg	-	405.265	7.57797	M-H2O-H	C24H40O6	0	75.8	HMDB0013158	-	-	-	-	-	Lipids and lipid-like molecules	Glycerophospholipids	Glycerophosphoglycerophosphates	0	75.8	-	-	1.0862	1.076	0.0146	0.1971	5.5523	5.6046	5.7242	5.7508	5.5759	5.47	5.5342	5.3653	5.4497	5.1292
pos_255	LysoPG(18:1(9Z)/0:0)	metab_1713	yes	-	pos	-	533.284	7.04445	M+H, M+Na, M+H-2H2O	C24H47O9P	0	52.6	HMDB0240602	-	-	-	-	-	Lipids and lipid-like molecules	Glycerophospholipids	Glycerophosphoglycerols	0	52.6	-	-	2.2907	2.1501	0.03354	0.3632	5.9533	5.7335	6.3685	6.363	5.9548	5.3562	5.7548	4.3665	5.9684	4.7233
neg_3736	LysoPC(18:0/0:0)	metab_15380	yes	C04230;C04317	neg	19420-57-6;74430-89-0	568.362	7.53102	M+FA-H	C26H54NO7P	0	82.1	HMDB0010384;HMDB0011149	Lipids;-	Phospholipids;-	map00565;map00564;map05231;map01100	Metabolism;Metabolism;Human Diseases;Metabolism	Lipid metabolism;Lipid metabolism;Cancer: overview;Global and overview maps	Lipids and lipid-like molecules	Glycerophospholipids	Glycerophosphocholines	0	82.1	Ether lipid metabolism;Glycerophospholipid metabolism;Choline metabolism in cancer;Metabolic pathways	Ether lipid metabolism;Glycerophospholipid metabolism;Choline metabolism in cancer;Metabolic pathways	1.453	1.4557	0.02527	0.2301	6.5443	6.2343	5.9082	6.5938	6.3051	6.9615	6.3329	7.0001	7.0078	6.7282
pos_4107	PC(18:1(9Z)e/2:0)	metab_3423	yes	C04598	pos	-	572.368	7.67213	M+Na	C28H56NO7P	0	78.4	HMDB0011148	-	-	map00565;map01100;map04080;map05310	Metabolism;Metabolism;Environmental Information Processing;Human Diseases	Lipid metabolism;Global and overview maps;Signaling molecules and interaction;Immune disease	Lipids and lipid-like molecules	Glycerophospholipids	Glycerophosphocholines	0	78.4	Ether lipid metabolism;Metabolic pathways;Neuroactive ligand-receptor interaction;Asthma	Ether lipid metabolism;Metabolic pathways;Neuroactive ligand-receptor interaction;Asthma	2.6977	2.5367	0.01026	0.2525	4.9252	4.1576	4.1855	4.1884	4.3316	5.7091	4.3089	5.7105	5.5811	5.5742
pos_1152	LysoPC(20:5(5Z,8Z,11Z,14Z,17Z)/0:0)	metab_171	yes	C04230	pos	-	542.324	6.52018	M+H, M+Na	C28H48NO7P	0	86	HMDB0010397	Lipids	Phospholipids	map00564;map05231	Metabolism;Human Diseases	Lipid metabolism;Cancer: overview	Lipids and lipid-like molecules	Glycerophospholipids	Glycerophosphocholines	0	86	Glycerophospholipid metabolism;Choline metabolism in cancer	Glycerophospholipid metabolism;Choline metabolism in cancer	1.6421	1.5411	0.04952	0.4051	5.5693	4.6736	5.0755	5.5616	5.3507	4.5956	5.0976	4.7885	4.8851	4.6539
pos_228	LysoPC(22:6(4Z,7Z,10Z,13Z,16Z,19Z)/0:0)	metab_1414	yes	C04230	pos	162440-05-3	568.339	6.59177	M+H, M+Na, M+H-H2O	C30H50NO7P	0	74.5	HMDB0010404	Lipids	Phospholipids	map00564;map05231	Metabolism;Human Diseases	Lipid metabolism;Cancer: overview	Lipids and lipid-like molecules	Glycerophospholipids	Glycerophosphocholines	0	74.5	Glycerophospholipid metabolism;Choline metabolism in cancer	Glycerophospholipid metabolism;Choline metabolism in cancer	1.8133	1.7562	0.02365	0.3207	5.9574	5.6895	4.9911	5.5886	5.1057	6.1041	5.9329	6.0745	5.8043	6.072
pos_33	2-Lysophosphatidylcholine	metab_2538	yes	C04230	pos	-	524.371	7.72757	M+H, M+K, M+2Na-H, M+H-H2O	C26H54NO7P	0	84.2	HMDB0258493	Lipids	Phospholipids	map00564;map05231	Metabolism;Human Diseases	Lipid metabolism;Cancer: overview	Lipids and lipid-like molecules	Glycerophospholipids	Glycerophosphocholines	0	84.2	Glycerophospholipid metabolism;Choline metabolism in cancer	Glycerophospholipid metabolism;Choline metabolism in cancer	2.2833	2.163	0.007017	0.2139	7.0499	6.651	6.3939	6.9291	6.964	7.7721	6.9377	7.7875	7.7007	7.4122
pos_3842	PC(17:0/0:0)	metab_3129	yes	C04230	pos	50930-23-9	532.337	7.66415	M+Na	C25H52NO7P	69.4	0	LMGP01050024;HMDB0012108	Lipids	Phospholipids	map00564;map05231	Metabolism;Human Diseases	Lipid metabolism;Cancer: overview	Lipids and lipid-like molecules	Glycerophospholipids	Glycerophosphocholines	69.4	0	Glycerophospholipid metabolism;Choline metabolism in cancer	Glycerophospholipid metabolism;Choline metabolism in cancer	2.6983	2.5385	0.003464	0.1716	3.4526	3.4661	3.494	3.497	3.601	4.9205	3.6174	4.66	4.7228	4.3142
pos_3864	LysoPC(16:0/0:0)	metab_3153	yes	C04230	pos	17364-16-8	518.322	7.71195	M+Na	C24H50NO7P	0	85.4	HMDB0010382	Lipids	Phospholipids	map00564;map05231	Metabolism;Human Diseases	Lipid metabolism;Cancer: overview	Lipids and lipid-like molecules	Glycerophospholipids	Glycerophosphocholines	0	85.4	Glycerophospholipid metabolism;Choline metabolism in cancer	Glycerophospholipid metabolism;Choline metabolism in cancer	2.6793	2.5198	0.00583	0.2043	6.2693	5.6015	5.4853	5.6289	5.7049	6.9893	5.9065	7.0291	7.0554	6.5468
pos_3866	LysoPC(18:1(11Z)/0:0)	metab_3155	yes	C04230	pos	-	504.342	7.71972	M+H-H2O	C26H52NO7P	0	61.4	HMDB0010385	Lipids	Phospholipids	map00564;map05231	Metabolism;Human Diseases	Lipid metabolism;Cancer: overview	Lipids and lipid-like molecules	Glycerophospholipids	Glycerophosphocholines	0	61.4	Glycerophospholipid metabolism;Choline metabolism in cancer	Glycerophospholipid metabolism;Choline metabolism in cancer	2.3255	2.1559	0.02879	0.3385	5.0789	4.7791	4.5836	4.4294	5.5787	6.1635	4.8784	5.9993	5.9861	5.5383
pos_3869	LysoPC(20:1(11Z)/0:0)	metab_3158	yes	C04230	pos	-	550.387	7.72757	M+H	C28H56NO7P	0	91.7	HMDB0010391	Lipids	Phospholipids	map00564;map05231	Metabolism;Human Diseases	Lipid metabolism;Cancer: overview	Lipids and lipid-like molecules	Glycerophospholipids	Glycerophosphocholines	0	91.7	Glycerophospholipid metabolism;Choline metabolism in cancer	Glycerophospholipid metabolism;Choline metabolism in cancer	2.4412	2.3254	0.008588	0.2326	5.5863	5.1305	4.4249	5.0392	5.3051	6.1281	5.3407	6.1308	6.0432	6.0783
pos_4078	PC(16:0/0:0)	metab_3390	yes	C04230	pos	17364-16-8	496.34	7.73553	M+H	C24H50NO7P	86	0	HMDB0010382;LMGP01050018	Lipids	Phospholipids	map00564;map05231	Metabolism;Human Diseases	Lipid metabolism;Cancer: overview	Lipids and lipid-like molecules	Glycerophospholipids	Glycerophosphocholines	86	0	Glycerophospholipid metabolism;Choline metabolism in cancer	Glycerophospholipid metabolism;Choline metabolism in cancer	2.3904	2.2429	0.004735	0.1884	6.6231	6.2143	6.0731	6.1279	6.2709	7.2297	6.4338	7.2871	7.3103	6.8327
pos_4085	PC(P-18:0/0:0)	metab_3398	yes	C04230	pos	-	530.358	7.71195	M+Na	C26H54NO6P	73.2	0	HMDB0013122;LMGP01070009	Lipids	Phospholipids	map00564;map05231	Metabolism;Human Diseases	Lipid metabolism;Cancer: overview	Lipids and lipid-like molecules	Glycerophospholipids	Glycerophosphocholines	73.2	0	Glycerophospholipid metabolism;Choline metabolism in cancer	Glycerophospholipid metabolism;Choline metabolism in cancer	2.222	2.0531	0.0459	0.3955	4.7734	3.8747	3.9026	3.9055	4.6512	5.59	4.026	5.3564	5.2518	4.8925
pos_4192	LysoPC(17:0/0:0)	metab_3515	yes	C04230	pos	50930-23-9	510.355	7.3943	M+H	C25H52NO7P	0	79.9	HMDB0012108	Lipids	Phospholipids	map00564;map05231	Metabolism;Human Diseases	Lipid metabolism;Cancer: overview	Lipids and lipid-like molecules	Glycerophospholipids	Glycerophosphocholines	0	79.9	Glycerophospholipid metabolism;Choline metabolism in cancer	Glycerophospholipid metabolism;Choline metabolism in cancer	1.9902	1.8297	0.04176	0.3869	4.5739	4.5875	4.6154	4.6183	4.7224	5.9372	4.7388	5.5269	5.4874	4.5677
pos_4297	1-Palmitoylphosphatidylcholine	metab_3631	yes	C04230	pos	17364-16-8	518.321	7.04445	M+Na	C24H50NO7P	0	91.8	HMDB0010382;HMDB0256091	Lipids	Phospholipids	map00564;map05231	Metabolism;Human Diseases	Lipid metabolism;Cancer: overview	Lipids and lipid-like molecules	Glycerophospholipids	Glycerophosphocholines	0	91.8	Glycerophospholipid metabolism;Choline metabolism in cancer	Glycerophospholipid metabolism;Choline metabolism in cancer	1.9813	1.873	0.0238	0.3207	7.1817	6.8506	6.7169	6.9422	6.7894	7.8161	6.7618	7.6148	7.8541	7.4176
pos_940	LysoPC(14:0/0:0)	metab_7629	yes	C04230	pos	20559-16-4	468.308	6.61565	M+H, M+Na	C22H46NO7P	0	54.8	PW_C006388;HMDB0010379	Lipids	Phospholipids	map00564;map05231	Metabolism;Human Diseases	Lipid metabolism;Cancer: overview	Lipids and lipid-like molecules	Glycerophospholipids	Glycerophosphocholines	0	54.8	Glycerophospholipid metabolism;Choline metabolism in cancer	Glycerophospholipid metabolism;Choline metabolism in cancer	1.7478	1.7179	0.01419	0.2707	6.4439	6.3579	6.2927	6.5074	6.0844	6.966	6.3544	6.6619	6.9751	7.0205
neg_3557	LysoPC(15:0/0:0)	metab_10586	yes	C04230	neg	-	480.309	6.7266	M-H	C23H48NO7P	0	47.8	HMDB0010381;HMDB0010375	Lipids	Phospholipids	map00564;map05231	Metabolism;Human Diseases	Lipid metabolism;Cancer: overview	Lipids and lipid-like molecules	Glycerophospholipids	Glycerophosphocholines	0	47.8	Glycerophospholipid metabolism;Choline metabolism in cancer	Glycerophospholipid metabolism;Choline metabolism in cancer	2.0377	1.9978	0.0004495	0.08538	6.9389	6.6702	6.5422	7.03	6.6347	7.3514	7.4977	7.7324	7.5027	7.259
neg_477	LysoPC(0:0/16:0)	metab_11928	yes	-	neg	66757-27-5	540.331	6.73443	M+FA-H, 2M+FA-H	C24H50NO7P	0	82.6	HMDB0240262	-	-	-	-	-	Lipids and lipid-like molecules	Glycerophospholipids	Glycerophosphocholines	0	82.6	-	-	1.5496	1.5516	0.01706	0.208	7.0674	6.8012	6.6302	6.9386	6.8177	7.5067	6.8222	7.5588	7.7514	7.2559
neg_5160	5-Hexyltetrahydro-2-oxo-3-furancarboxylic acid	metab_12362	yes	-	neg	-	427.233	5.57748	2M-H	C11H18O4	0	68.9	HMDB0030984	-	-	-	-	-	Organoheterocyclic compounds	Lactones	Gamma butyrolactones	0	68.9	-	-	1.5006	1.4787	0.02875	0.2372	5.7029	5.9202	5.3022	5.5117	5.1077	5.2119	4.982	4.6483	4.8549	5.3356
neg_6430	8-Deoxylactucin	metab_13767	yes	C09392	neg	65725-10-2	281.081	3.84	M+Na-2H	C15H16O4	0	36.9	HMDB0301858	-	-	-	-	-	Organoheterocyclic compounds	Lactones	Gamma butyrolactones	0	36.9	-	-	2.9285	2.7698	0.01499	0.1981	4.7035	5.2384	4.746	4.5841	4.6517	3.6287	2.4018	1.4111	4.4212	3.6518
pos_3268	Nuatigenin	metab_2503	yes	C04715	pos	6811-35-4	431.315	5.80398	M+H	C27H42O4	0	54.7	HMDB0301755;LMST01090001	Steroids	27-Carbon atoms	-	-	-	Lipids and lipid-like molecules	Steroids and steroid derivatives	Furospirostanes and derivatives	0	54.7	-	-	2.7814	2.6523	0.002042	0.1425	4.6176	4.3756	4.4735	3.8982	3.4364	5.3035	5.0811	5.0286	5.2251	5.1642
neg_6818	Marmesin rhamnoside	metab_14195	yes	-	neg	142347-99-7	429.097	3.43075	M+K-2H	C20H24O8	0	40.1	HMDB0039564	-	-	-	-	-	Phenylpropanoids and polyketides	Coumarins and derivatives	Furanocoumarins	0	40.1	-	-	2.7986	2.7592	0.0006277	0.0988	4.8238	4.7647	5.4931	5.2399	5.5298	3.1921	4.1212	4.1799	3.4579	3.9978
pos_5924	5-((6-((Aminomethyl)amino)-1-oxohexyl)amino)pentanoic acid	metab_5422	yes	-	pos	-	608.385	4.3746	2M+ACN+Na	C12H24N4O3	0	45	HMDB0258266	-	-	-	-	-	Lipids and lipid-like molecules	Fatty Acyls	Fatty amides	0	45	-	-	2.117	2.0258	2.059e-06	0.001107	5.8284	5.7102	5.8096	5.6908	5.8789	6.2441	6.3635	6.3345	6.2542	6.2906
neg_3348	(Z)-11-Hexadecenal	metab_10355	yes	-	neg	-	237.222	6.35145	M-H	C16H30O	0	52.7	HMDB0243751	-	-	-	-	-	Lipids and lipid-like molecules	Fatty Acyls	Fatty aldehydes	0	52.7	-	-	2.0266	1.9911	0.02341	0.2231	4.7993	4.6945	6.2026	6.0571	5.7942	4.3817	4.7457	4.7172	4.6476	4.5024
pos_4836	Solutol HS 15	metab_4224	yes	C11317	pos	61909-81-7	362.326	6.21067	M+NH4	C20H40O4	0	62	HMDB0258368	-	-	-	-	-	Lipids and lipid-like molecules	Fatty Acyls	Fatty alcohols	0	62	-	-	1.1436	1.0758	0.006624	0.2137	7.4099	7.2353	7.3462	7.3541	7.2301	7.0837	7.1139	7.0525	7.1937	7.2358
neg_4532	Avocadyne	metab_11666	yes	-	neg	129099-96-3	265.217	6.3203	M-H2O-H	C17H32O3	0	52.2	LMFA05000643;HMDB0035473	-	-	-	-	-	Lipids and lipid-like molecules	Fatty Acyls	Fatty alcohols	0	52.2	-	-	3.3284	3.2294	0.0123	0.1942	5.3388	3.0092	6.4289	6.3106	6.0225	2.6967	3.0603	3.0318	4.314	2.8172
neg_5950	Gibberellin A29	metab_13236	yes	C06096	neg	-	385.107	4.39088	M+K-2H	C19H24O6	0	36.9	LMPR0104170036;HMDB0303458	-	-	map00904	Metabolism	Metabolism of terpenoids and polyketides	Lipids and lipid-like molecules	Fatty Acyls	Fatty alcohol esters	0	36.9	Diterpenoid biosynthesis	Diterpenoid biosynthesis	1.5501	1.5295	0.001234	0.1177	6.2079	6.3214	6.6551	6.3631	6.3455	5.7836	6.0869	5.9062	6.0017	5.9257
pos_3430	Panaquinquecol 6	metab_2682	yes	-	pos	145400-15-3	301.18	6.13907	M+H-H2O	C19H26O4	0	32.1	HMDB0035500;LMFA07010986	-	-	-	-	-	Lipids and lipid-like molecules	Fatty Acyls	Fatty alcohol esters	0	32.1	-	-	2.4977	2.4453	0.002161	0.1428	5.3821	5.4038	5.5851	5.5485	4.8636	4.4198	4.7329	4.8846	4.1118	4.5101
pos_4080	Eriojaposide B	metab_3393	yes	C17889	pos	351412-97-0	534.296	7.72757	M+NH4	C25H40O11	0	64.4	HMDB0038029	-	-	-	-	-	Lipids and lipid-like molecules	Fatty Acyls	Fatty acyl glycosides	0	64.4	-	-	3.2415	3.1249	0.04966	0.4054	2.1357	2.1491	2.1769	4.8083	2.6274	5.3883	2.2996	5.4619	5.5115	4.4818
neg_4761	Capsianoside I	metab_11919	yes	-	neg	121924-04-7	641.319	5.994	M-H2O-H	C32H52O14	0	45.8	HMDB0002318	-	-	-	-	-	Lipids and lipid-like molecules	Fatty Acyls	Fatty acyl glycosides	0	45.8	-	-	2.0225	1.9441	0.02198	0.2224	5.9452	6.0587	5.634	6.3068	5.159	5.295	4.4144	4.3859	5.311	5.4005
neg_5808	(E)-2-Methyl-2-buten-1-ol O-beta-D-Glucopyranoside	metab_13079	yes	-	neg	-	293.124	4.59687	M+FA-H	C11H20O6	0	45.3	HMDB0033064	-	-	-	-	-	Lipids and lipid-like molecules	Fatty Acyls	Fatty acyl glycosides	0	45.3	-	-	1.7688	1.7841	0.03363	0.25	3.3741	3.7207	3.6978	2.505	2.487	2.0601	2.422	2.3936	2.3243	2.7616
pos_4877	Docosahexaenoic acid	metab_4269	yes	C06429	pos	6217-54-5	293.226	6.155	M+H-2H2O	C22H32O2	0	58.6	HMDB0002183;PW_C001472;LMFA01031176;LMFA01030185	Lipids	Fatty acids	map01040	Metabolism	Lipid metabolism	Lipids and lipid-like molecules	Fatty Acyls	Fatty acids and conjugates	0	58.6	Biosynthesis of unsaturated fatty acids	Biosynthesis of unsaturated fatty acids	1.7135	1.6502	0.03161	0.353	3.6093	3.6228	3.6508	3.6537	3.7577	4.7313	3.7742	3.7536	4.1765	4.2049
neg_5863	20-Carboxyleukotriene B4	metab_13140	yes	C05950	neg	80434-82-8	365.197	4.5145	M-H	C20H30O6	0	44.4	HMDB0245560;HMDB0012641;HMDB0006059	-	-	map00590	Metabolism	Lipid metabolism	Lipids and lipid-like molecules	Fatty Acyls	Fatty acids and conjugates	0	44.4	Arachidonic acid metabolism	Arachidonic acid metabolism	1.4175	1.4127	0.02782	0.2355	6.1064	6.196	5.7857	5.9459	5.349	5.5663	5.5109	5.1383	5.3061	5.5614
pos_3737	DG(9D5/9D3/0:0)	metab_3014	yes	C00165	pos	-	655.49	7.16392	M+H-H2O	C41H68O7	0	37.1	PW_C063676;HMDB0116437	-	-	map05214;map05167;map04650;map05163;map04750;map05235;map04015;map04014;map04659;map04540;map04010;map04012;map05022;map04370;map04371;map04072;map04071;map04975;map05143;map05012;map05231;map05146;map04919;map05200;map04961;map04745;map04921;map04920;map04923;map04925;map05017;map04625;map04929;map04726;map04725;map04724;map04723;map04722;map05223;map04720;map04666;map05170;map04664;map04658;map…	Human Diseases;Human Diseases;Organismal Systems;Human Diseases;Organismal Systems;Human Diseases;Environmental Information Processing;Environmental Information Processing;Organismal Systems;Cellular Processes;Environmental Information Processing;Environmental Information Processing;Human Diseases;Environmental Information Processing;Environmental Information Processing;Environmental Information …	Cancer: specific types;Infectious disease: viral;Immune system;Infectious disease: viral;Sensory system;Cancer: overview;Signal transduction;Signal transduction;Immune system;Cellular community - eukaryotes;Signal transduction;Signal transduction;Neurodegenerative disease;Signal transduction;Signal transduction;Signal transduction;Signal transduction;Digestive system;Infectious disease: parasitic…	Lipids and lipid-like molecules	Fatty Acyls	Fatty acids and conjugates	0	37.1	Glioma;Kaposi sarcoma-associated herpesvirus infection;Natural killer cell mediated cytotoxicity;Human cytomegalovirus infection;Inflammatory mediator regulation of TRP channels;PD-L1 expression and PD-1 checkpoint pathway in cancer;Rap1 signaling pathway;Ras signaling pathway;Th17 cell differentiation;Gap junction;MAPK signaling pathway;ErbB signaling pathway;Pathways of neurodegeneration - mult…	Glioma;Kaposi sarcoma-associated herpesvirus infection;Natural killer cell mediated cytotoxicity;Human cytomegalovirus infection;Inflammatory mediator regulation of TRP channels;PD-L1 expression and PD-1 checkpoint pathway in cancer;Rap1 signaling pathway;Ras signaling pathway;Th17 cell differentiation;Gap junction;MAPK signaling pathway;ErbB signaling pathway;Pathways of neurodegeneration - mult…	1.0066	0.9431	0.01388	0.2672	6.274	6.2983	6.2902	6.3639	6.4243	6.0576	6.2229	6.1609	6.2329	6.2592
pos_1139	7Z,10Z-Hexadecadienoic acid	metab_156	yes	-	pos	28290-73-5	275.2	6.54405	M+H-2H2O, M+Na	C16H28O2	0	54.1	LMFA01030807;HMDB0000477	-	-	-	-	-	Lipids and lipid-like molecules	Fatty Acyls	Fatty acids and conjugates	0	54.1	-	-	1.6286	1.5463	0.03614	0.3685	6.2418	6.1414	5.66	5.726	6.2462	6.5576	6.539	6.696	6.0315	6.3553
pos_1143	Dodecatrienoic acid	metab_161	yes	-	pos	-	195.138	6.54405	M+H-H2O, M+H	C12H18O2	0	43.5	HMDB0302622	-	-	-	-	-	Lipids and lipid-like molecules	Fatty Acyls	Fatty acids and conjugates	0	43.5	-	-	1.4691	1.3877	0.03515	0.3653	5.946	5.9044	5.4285	5.5071	5.8031	6.2501	6.0937	6.2082	5.7461	6.0366
pos_3487	9,12-Octadecadiynoic acid	metab_2743	yes	-	pos	-	241.195	6.25773	M+H-2H2O	C18H28O2	0	58.3	HMDB0247623;LMFA01030540	-	-	-	-	-	Lipids and lipid-like molecules	Fatty Acyls	Fatty acids and conjugates	0	58.3	-	-	1.6757	1.5729	0.00839	0.2314	5.5178	5.556	5.469	4.9725	5.406	5.8315	5.7181	5.6969	5.7398	5.8564
pos_4363	7-Aminoheptanoic acid	metab_3704	yes	-	pos	-	184.073	6.8541	M+K	C7H15NO2	0	59.5	HMDB0247233	-	-	-	-	-	Lipids and lipid-like molecules	Fatty Acyls	Fatty acids and conjugates	0	59.5	-	-	2.4553	2.3034	0.01002	0.2507	5.5062	5.1812	4.7692	4.9887	5.0873	6.3445	5.1428	6.2016	6.2205	5.8215
pos_4562	Myristoleic acid	metab_3925	yes	C08322	pos	544-64-9	249.185	6.54405	M+Na	C14H26O2	0	69.9	HMDB0002000;LMFA01030051	-	-	-	-	-	Lipids and lipid-like molecules	Fatty Acyls	Fatty acids and conjugates	0	69.9	-	-	1.3482	1.2766	0.0389	0.3754	5.9157	5.8602	5.5409	5.5739	6.0858	6.1945	6.1888	6.1996	5.8831	6.0154
pos_6095	8-Mercaptooctanoic acid	metab_5612	yes	-	pos	-	394.208	4.05197	2M+ACN+H	C8H16O2S	0	54.1	HMDB0247447	-	-	-	-	-	Lipids and lipid-like molecules	Fatty Acyls	Fatty acids and conjugates	0	54.1	-	-	3.2336	3.0034	0.01201	0.2594	3.5213	3.7375	5.0815	2.5193	3.8899	5.2198	5.6366	5.6532	4.9033	4.6728
pos_6357	Tetracosahexaenoic acid, n-3	metab_5903	yes	-	pos	-	401.239	3.63312	M+2Na-H	C24H36O2	0	41.6	HMDB0060117	-	-	-	-	-	Lipids and lipid-like molecules	Fatty Acyls	Fatty acids and conjugates	0	41.6	-	-	2.1505	2.0787	0.01008	0.2507	3.9375	4.2815	5.0664	4.6113	4.4773	3.7258	4.0481	3.9094	3.6671	3.6355
pos_84	(+/-)-2-Hydroxy-4-(methylthio)butanoic acid	metab_7519	yes	-	pos	120-91-2	192.069	3.3762	M+H-H2O, M+ACN+Na, M+ACN+H	C5H10O3S	0	50.1	HMDB0037115	-	-	-	-	-	Lipids and lipid-like molecules	Fatty Acyls	Fatty acids and conjugates	0	50.1	-	-	2.1105	2.0098	0.01149	0.2594	5.3443	5.9791	5.9923	5.6064	5.3316	4.512	5.0485	4.9315	5.2664	5.2406
neg_3443	Tetracosapentenoic acid	metab_10461	yes	-	neg	-	403.285	6.51547	M+FA-H	C24H38O2	0	87	HMDB0258880	-	-	-	-	-	Lipids and lipid-like molecules	Fatty Acyls	Fatty acids and conjugates	0	87	-	-	1.321	1.269	0.02615	0.2345	6.6455	6.4803	6.2803	6.9524	6.6398	5.9549	6.4313	6.1827	6.342	6.2223
neg_3875	Leucinic Acid	metab_10936	yes	-	neg	498-36-2	131.07	7.92325	M-H	C6H12O3	53.3	0	HMDB0000665;LMFA01050381	-	-	-	-	-	Lipids and lipid-like molecules	Fatty Acyls	Fatty acids and conjugates	53.3	0	-	-	1.2001	1.2095	0.04384	0.266	5.1229	5.4451	5.3727	5.3771	5.0391	4.581	5.3238	4.7357	4.9481	4.9864
neg_4474	Asparagoside A	metab_11601	yes	C08886	neg	14835-43-9	623.38	6.39045	M+FA-H	C33H54O8	0	52.8	HMDB0030046	-	-	-	-	-	Lipids and lipid-like molecules	Fatty Acyls	Fatty acids and conjugates	0	52.8	-	-	2.4588	2.4328	0.01093	0.1942	6.3045	6.513	5.4824	5.5781	4.7432	4.9418	3.9334	4.6238	4.8467	4.0712
neg_5106	2-Methylidene-4-(oxiran-2-yl)butanoic Acid	metab_12302	yes	-	neg	-	329.124	5.66178	2M+FA-H	C7H10O3	0	48.2	HMDB0257753	-	-	-	-	-	Lipids and lipid-like molecules	Fatty Acyls	Fatty acids and conjugates	0	48.2	-	-	2.6088	2.5795	0.004138	0.1664	5.3761	5.3291	5.1288	5.4891	5.7728	3.4608	4.8694	4.8615	3.7405	3.5814
neg_547	Trihydroxystearic acid	metab_12704	yes	-	neg	-	313.238	6.48417	M-H2O-H, M+K-2H	C18H36O5	0	33.2	HMDB0302290	-	-	-	-	-	Lipids and lipid-like molecules	Fatty Acyls	Fatty acids and conjugates	0	33.2	-	-	1.0761	1.0601	0.03947	0.266	6.1521	6.0753	6.0214	6.3817	6.1969	5.5457	6.0096	6.0458	5.9759	5.9006
neg_6850	6-(2-Hydroxyethoxy)-6-oxohexanoic acid	metab_14231	yes	-	neg	-	171.065	3.40662	M-H2O-H	C8H14O5	0	50.2	HMDB0061681	-	-	-	-	-	Lipids and lipid-like molecules	Fatty Acyls	Fatty acids and conjugates	0	50.2	-	-	1.1119	1.0665	0.0222	0.2224	5.257	5.2177	5.1359	5.5445	5.1878	5.0766	4.9899	4.8281	4.9909	5.168
neg_6959	Acrylamide-sodium acrylate resin	metab_14351	yes	-	neg	-	218.103	3.31982	M+FA-H	C8H15NO3	0	44.6	HMDB0303186	-	-	-	-	-	Lipids and lipid-like molecules	Fatty Acyls	Fatty acids and conjugates	0	44.6	-	-	1.5077	1.4633	0.01922	0.215	5.0445	5.4118	4.6194	4.9048	5.0413	4.4524	4.9177	4.3584	4.364	4.5278
neg_7320	3-Hydroxy-3-methylglutarate	metab_14751	yes	C03761	neg	503-49-1	323.098	1.22812	2M-H	C6H10O5	33.3	0	HMDB0000355	-	-	-	-	-	Lipids and lipid-like molecules	Fatty Acyls	Fatty acids and conjugates	33.3	0	-	-	1.0383	1.0093	0.01191	0.1942	6.1807	6.1952	6.1485	6.3633	6.2657	5.8422	6.1828	5.9839	5.993	6.0605
pos_4727	Polyoxyethylene 40 monostearate	metab_4104	yes	-	pos	9004-99-3	346.331	6.31347	M+NH4	C20H40O3	0	76.4	HMDB0032477	-	-	-	-	-	Lipids and lipid-like molecules	Fatty Acyls	Fatty acid esters	0	76.4	-	-	1.449	1.3517	0.01999	0.3021	6.6278	6.1431	6.3362	6.4593	6.1649	5.9591	6.1117	5.8481	6.1256	6.1319
neg_1558	(5E,7E)-Undeca-2,5,7-trienedioylcarnitine	metab_8375	yes	-	neg	-	374.157	3.49345	M+Na-2H	C18H27NO6	0	36.5	HMDB0241202	-	-	-	-	-	Lipids and lipid-like molecules	Fatty Acyls	Fatty acid esters	0	36.5	-	-	1.7972	1.7632	0.03987	0.266	4.2955	4.5518	4.6533	3.6236	4.9633	3.1262	3.4901	4.3698	3.8821	3.3824
neg_2347	(2E,8E)-10-hydroxydeca-2,8-dien-4-ynoylcarnitine	metab_9250	yes	-	neg	-	344.146	4.61845	M+Na-2H	C17H25NO5	0	31.1	HMDB0241109	-	-	-	-	-	Lipids and lipid-like molecules	Fatty Acyls	Fatty acid esters	0	31.1	-	-	1.7465	1.7136	0.04519	0.266	4.6559	4.8265	4.4377	3.5726	3.9718	3.1255	3.4894	3.5543	4.3318	3.2881
neg_4456	(5Z,7Z,10Z,13Z,16Z,19Z)-4-Hydroxydocosa-5,7,10,13,16,19-hexaenoylcarnitine	metab_11581	yes	-	neg	-	524.278	6.42168	M+K-2H	C29H45NO5	0	54.3	HMDB0241622	-	-	-	-	-	Lipids and lipid-like molecules	Fatty Acyls	Fatty acid esters	0	54.3	-	-	1.6424	1.6246	0.01404	0.1962	6.4377	6.5575	5.6828	6.4546	5.9191	6.9335	6.7299	6.6577	6.6734	6.9061
neg_7148	Allyl crotonate	metab_14561	yes	-	neg	5453-44-1	171.065	2.84985	M+FA-H	C7H10O2	0	31.8	HMDB0032067	-	-	-	-	-	Lipids and lipid-like molecules	Fatty Acyls	Fatty acid esters	0	31.8	-	-	1.1943	1.1423	0.01047	0.1942	5.4531	5.5158	5.3763	5.7026	5.3855	5.2348	5.1999	5.0038	5.2467	5.3627
pos_5023	19-Norandrostenedione	metab_4433	yes	C14500	pos	734-32-7	317.149	6.04348	M+2Na-H	C18H24O2	0	42.5	HMDB0244836	-	-	-	-	-	Lipids and lipid-like molecules	Steroids and steroid derivatives	Estrane steroids	0	42.5	-	-	1.1525	1.0763	0.03757	0.3707	6.2745	6.0099	6.0074	6.274	6.3298	6.0674	5.9259	5.788	6.0295	6.0119
pos_5158	Equilenin	metab_4579	yes	C14303	pos	517-09-9	305.092	5.9238	M+K	C18H18O2	0	32.9	HMDB0251896	Steroids	18-Carbon atoms	-	-	-	Lipids and lipid-like molecules	Steroids and steroid derivatives	Estrane steroids	0	32.9	-	-	1.844	1.7863	0.0006503	0.07248	4.671	4.663	4.9158	4.9898	4.663	5.1474	5.3095	5.2952	5.1105	5.2393
pos_5243	17alpha-Methylestradiol	metab_4673	yes	C14483	pos	302-76-1	309.18	5.78803	M+Na	C19H26O2	0	31.7	HMDB0244778	-	-	-	-	-	Lipids and lipid-like molecules	Steroids and steroid derivatives	Estrane steroids	0	31.7	-	-	1.9924	1.903	0.0009168	0.08914	5.516	5.5231	5.1559	5.6483	5.3238	5.0701	4.7833	4.9313	4.9126	4.962
pos_666	Trilostane	metab_6236	yes	C12580	pos	13647-35-3	368.16	4.31002	M+Na, M+K	C20H27NO3	0	37.6	HMDB0015240;MJDBOTE0000867	-	-	-	-	-	Lipids and lipid-like molecules	Steroids and steroid derivatives	Estrane steroids	0	37.6	-	-	1.5111	1.4766	0.01363	0.2651	5.1256	4.9773	4.8935	5.0189	5.3212	4.9216	4.3955	4.7463	4.7429	4.7489
neg_3392	(6alpha)-hydroxycampestanol	metab_10404	yes	-	neg	-	463.379	6.42952	M+FA-H	C28H50O2	0	46.1	HMDB0303980	-	-	-	-	-	Lipids and lipid-like molecules	Steroids and steroid derivatives	Ergostane steroids	0	46.1	-	-	1.9827	1.9219	0.001463	0.1177	6.8027	6.787	7.0151	7.4064	6.8125	6.3379	6.3551	6.01	6.5048	6.1398
pos_5716	(+/-)-11,12-Dihydroxy-5Z,8Z,14Z,17Z-eicosatetraenoic acid	metab_5192	yes	C14774	pos	192461-95-3	400.249	4.81707	M+ACN+Na	C20H32O4	0	70.8	LMFA03060079;HMDB0002314;HMDB0242269	-	-	map00590;map01100;map04726	Metabolism;Metabolism;Organismal Systems	Lipid metabolism;Global and overview maps;Nervous system	Lipids and lipid-like molecules	Fatty Acyls	Eicosanoids	0	70.8	Arachidonic acid metabolism;Metabolic pathways;Serotonergic synapse	Arachidonic acid metabolism;Metabolic pathways;Serotonergic synapse	2.7293	2.5797	0.001371	0.113	4.6536	4.5963	5.0979	4.3548	4.7249	5.741	5.7506	5.8451	5.0102	5.8055
neg_391	6-Keto-prostaglandin F1a	metab_10975	yes	C05961	neg	58962-34-8	351.218	5.93142	M-H2O-H, M-H	C20H34O6	0	34.4	PW_C001726;HMDB0002886	-	-	map00590;map01100	Metabolism;Metabolism	Lipid metabolism;Global and overview maps	Lipids and lipid-like molecules	Fatty Acyls	Eicosanoids	0	34.4	Arachidonic acid metabolism;Metabolic pathways	Arachidonic acid metabolism;Metabolic pathways	1.2459	1.2108	0.03038	0.2424	6.8721	6.9257	6.6818	7.1266	6.4682	6.5078	6.5436	6.1941	6.4791	6.6072
pos_3136	Prostaglandin G2 2-glyceryl Ester	metab_2360	yes	-	pos	-	460.29	5.38645	M+NH4	C23H38O8	0	75.2	HMDB0062591	-	-	-	-	-	Lipids and lipid-like molecules	Fatty Acyls	Eicosanoids	0	75.2	-	-	3.8335	3.6596	0.004048	0.1833	3.0256	2.5701	3.6998	2.6009	5.0218	5.0412	5.9632	5.7906	5.0963	5.0101
pos_4689	PGF2a ethanolamide	metab_4061	yes	C13828	pos	-	415.32	6.35318	M+NH4	C22H39NO5	0	38.5	HMDB0013628	-	-	-	-	-	Lipids and lipid-like molecules	Fatty Acyls	Eicosanoids	0	38.5	-	-	1.2633	1.197	0.001778	0.1318	7.1292	7.1845	7.1759	7.1193	7.1997	7.4983	7.3649	7.3338	7.2414	7.3964
pos_793	Prostaglandin E3	metab_7467	yes	C06439	pos	802-31-3	315.195	5.61958	M+H-2H2O, M+H	C20H30O5	0	36.2	LMFA03010135;HMDB0247474;HMDB0002664	Lipids	Eicosanoids	-	-	-	Lipids and lipid-like molecules	Fatty Acyls	Eicosanoids	0	36.2	-	-	1.2022	1.1877	0.03687	0.3696	5.7356	5.8827	5.5834	5.7464	5.517	5.4214	5.6467	5.5755	5.2557	5.3696
neg_4319	13,14-Dihydro-15-keto-PGE2	metab_11429	yes	C04671	neg	363-23-5	351.221	6.60152	M-H	C20H32O5	70.3	0	LMFA03010031;HMDB0002776	-	-	-	-	-	Lipids and lipid-like molecules	Fatty Acyls	Eicosanoids	70.3	0	-	-	1.5694	1.5445	0.004764	0.1725	7.6393	7.6979	8.1782	7.9576	8.1291	7.4988	7.5969	7.4185	7.4605	7.2704
neg_1573	Gibberellin A8	metab_8392	yes	C03579	neg	7044-72-6	401.102	3.50913	M+K-2H	C19H24O7	0	50.7	HMDB0303450;LMPR0104170005	-	-	map00904	Metabolism	Metabolism of terpenoids and polyketides	Lipids and lipid-like molecules	Prenol lipids	Diterpenoids	0	50.7	Diterpenoid biosynthesis	Diterpenoid biosynthesis	1.703	1.6723	0.01149	0.1942	5.5636	5.4442	6.1267	6.0103	5.6956	4.7015	5.168	5.1938	5.4348	5.3639
neg_2735	Gibberellin A29-catabolite	metab_9678	yes	C11855	neg	76040-29-4	383.092	5.30555	M+K-2H	C19H22O6	0	48.6	HMDB0304360;LMPR0104170012	-	-	map00904	Metabolism	Metabolism of terpenoids and polyketides	Lipids and lipid-like molecules	Prenol lipids	Diterpenoids	0	48.6	Diterpenoid biosynthesis	Diterpenoid biosynthesis	1.722	1.6259	0.0101	0.1942	5.56	5.6825	5.0271	5.2181	5.7964	4.883	4.6429	4.8473	5.1386	4.9893
neg_6287	Gibberellin A8-catabolite	metab_13607	yes	C11870	neg	78791-79-4	399.086	3.98152	M+K-2H	C19H22O7	0	48.1	HMDB0304364;LMPR0104170027	-	-	map00904	Metabolism	Metabolism of terpenoids and polyketides	Lipids and lipid-like molecules	Prenol lipids	Diterpenoids	0	48.1	Diterpenoid biosynthesis	Diterpenoid biosynthesis	1.8598	1.8015	0.01166	0.1942	5.3506	5.1331	5.6426	5.9983	5.7897	4.3375	4.8893	5.0399	5.1955	4.9904
pos_2816	Gibberellin A15	metab_7721	yes	C11860	pos	-	353.17	4.41453	M+Na	C20H26O4	0	53.2	LMPR0104170017;HMDB0303456	-	-	map01100;map00904;map01110	Metabolism;Metabolism;Metabolism	Global and overview maps;Metabolism of terpenoids and polyketides;Global and overview maps	Lipids and lipid-like molecules	Prenol lipids	Diterpenoids	0	53.2	Metabolic pathways;Diterpenoid biosynthesis;Biosynthesis of secondary metabolites	Metabolic pathways;Diterpenoid biosynthesis;Biosynthesis of secondary metabolites	1.3835	1.3362	0.0004498	0.05677	5.3231	5.2215	5.3296	5.2249	5.2319	5.0764	4.9221	4.9547	5.0792	5.0812
pos_5496	Gibberellin A37	metab_7722	yes	C11859	pos	38231-54-8	379.211	5.25775	M+CH3OH+H	C20H26O5	0	43.9	HMDB0035047;LMPR0104170016	-	-	map01100;map00904;map01110	Metabolism;Metabolism;Metabolism	Global and overview maps;Metabolism of terpenoids and polyketides;Global and overview maps	Lipids and lipid-like molecules	Prenol lipids	Diterpenoids	0	43.9	Metabolic pathways;Diterpenoid biosynthesis;Biosynthesis of secondary metabolites	Metabolic pathways;Diterpenoid biosynthesis;Biosynthesis of secondary metabolites	1.8427	1.8025	0.01038	0.2545	4.5765	4.2072	4.0894	4.1406	4.622	4.6054	5.0183	4.7592	4.6709	5.1614
neg_5063	Gibberellin A24	metab_12254	yes	C11861	neg	19427-32-8	383.128	5.73232	M+K-2H	C20H26O5	0	46	LMPR0104170018;HMDB0303459	-	-	map01100;map00904;map01110	Metabolism;Metabolism;Metabolism	Global and overview maps;Metabolism of terpenoids and polyketides;Global and overview maps	Lipids and lipid-like molecules	Prenol lipids	Diterpenoids	0	46	Metabolic pathways;Diterpenoid biosynthesis;Biosynthesis of secondary metabolites	Metabolic pathways;Diterpenoid biosynthesis;Biosynthesis of secondary metabolites	1.2622	1.2689	0.009195	0.1942	7.3896	7.7244	7.7574	7.6833	7.3903	7.3166	7.3564	7.1987	7.073	7.3324
pos_1263	Lactapiperanol C	metab_293	yes	-	pos	243447-93-0	247.169	6.19475	M+H-2H2O, M+Na	C16H26O4	0	55.9	HMDB0033630	-	-	-	-	-	Lipids and lipid-like molecules	Prenol lipids	Diterpenoids	0	55.9	-	-	1.0247	0.9639	0.01485	0.2725	6.5331	6.3922	6.5599	6.3271	6.5341	6.5965	6.6918	6.6318	6.6094	6.5869
pos_31	Cavipetin C	metab_2319	yes	-	pos	128552-90-9	371.258	6.10727	M+H-H2O, M+Na, M+NH4, M+H-2H2O	C24H36O4	0	57	HMDB0030366	-	-	-	-	-	Lipids and lipid-like molecules	Prenol lipids	Diterpenoids	0	57	-	-	1.3448	1.2654	0.01275	0.2617	7.8611	7.8888	7.9794	7.547	7.7429	8.1058	8.0122	7.9861	8.0481	8.1446
pos_6534	12'-Apo-b-carotene-3,12'-diol	metab_6098	yes	-	pos	120021-87-6	413.239	3.3762	M+2Na-H	C25H36O2	0	35.1	HMDB0036054	-	-	-	-	-	Lipids and lipid-like molecules	Prenol lipids	Diterpenoids	0	35.1	-	-	1.6917	1.5991	0.03685	0.3696	4.4168	4.5361	4.2684	3.8074	4.9334	4.8066	4.8347	4.8924	4.833	4.8983
neg_2617	Gibberellin A6	metab_9548	yes	C11856	neg	19147-78-5	383.092	5.12498	M+K-2H	C19H22O6	0	39.4	HMDB0303476;LMPR0104170013	-	-	-	-	-	Lipids and lipid-like molecules	Prenol lipids	Diterpenoids	0	39.4	-	-	2.481	2.3152	0.0148	0.1981	5.631	5.709	4.5668	5.2438	5.8655	4.1605	3.6082	3.5797	5.123	4.6671
neg_4586	(3beta,17alpha,23S)-17,23-Epoxy-3,28,29-trihydroxy-27-norlanost-8-en-24-one	metab_11725	yes	-	neg	-	519.335	6.24258	M+FA-H	C29H46O5	0	66.5	HMDB0035221	-	-	-	-	-	Lipids and lipid-like molecules	Prenol lipids	Diterpenoids	0	66.5	-	-	1.5134	1.5054	0.04477	0.266	5.7706	5.6656	5.8786	5.9158	5.5866	4.6173	5.1642	5.1072	5.9592	5.3003
neg_5380	Gibberellin A74	metab_12605	yes	-	neg	90806-14-7	401.139	5.2579	M+K-2H	C20H28O6	0	67.1	HMDB0038746	-	-	-	-	-	Lipids and lipid-like molecules	Prenol lipids	Diterpenoids	0	67.1	-	-	1.1765	1.14	0.04241	0.266	5.8532	5.8156	5.9422	5.9464	5.461	5.5816	5.3794	5.1558	5.7522	5.5284
neg_3408	7a,12a-Dihydroxy-5b-cholestan-3-one	metab_10422	yes	C05453	neg	-	463.343	6.46068	M+FA-H	C27H46O3	0	30.7	HMDB0006887;PW_C002989	-	-	map01100;map00120	Metabolism;Metabolism	Global and overview maps;Lipid metabolism	Lipids and lipid-like molecules	Glycerolipids	Diradylglycerols	0	30.7	Metabolic pathways;Primary bile acid biosynthesis	Metabolic pathways;Primary bile acid biosynthesis	1.4993	1.4527	0.005709	0.1756	6.815	6.7803	6.7213	7.1521	6.6186	6.2292	6.4731	6.2261	6.5778	6.4476
pos_1190	3-(2-Heptenyloxy)-2-hydroxypropyl undecanoate	metab_212	yes	-	pos	-	398.325	6.35318	M+ACN+H, M+2Na-H	C21H40O4	0	47.1	HMDB0034031	-	-	-	-	-	Lipids and lipid-like molecules	Glycerolipids	Diradylglycerols	0	47.1	-	-	1.0934	1.0415	0.009457	0.2471	5.9676	6.098	6.1841	6.0238	6.0295	6.3014	6.1694	6.1909	6.1672	6.3162
pos_3114	Fexofenadine	metab_2336	yes	C06999	pos	83799-24-0	484.28	5.32178	M+H-H2O	C32H39NO4	0	45.7	HMDB0005030;PW_C002373	-	-	map04976	Organismal Systems	Digestive system	Benzenoids	Benzene and substituted derivatives	Diphenylmethanes	0	45.7	Bile secretion	Bile secretion	2.5311	2.3289	0.02829	0.3374	4.9797	4.8238	3.9457	3.1779	4.4835	5.4888	4.7768	5.5962	5.3369	5.0353
pos_3102	Silux	metab_2323	yes	C14511	pos	-	530.279	5.28977	M+NH4	C29H36O8	0	42.7	HMDB0249239	-	-	-	-	-	Benzenoids	Benzene and substituted derivatives	Diphenylmethanes	0	42.7	-	-	1.9866	1.8997	0.009814	0.2477	4.0663	3.9329	4.0739	3.7892	4.4937	4.4496	4.9934	4.842	4.5986	4.331
neg_2865	Thyronamine	metab_9822	yes	-	neg	-	228.103	5.5417	M-H	C14H15NO2	0	30.5	HMDB0259061	-	-	-	-	-	Benzenoids	Benzene and substituted derivatives	Diphenylethers	0	30.5	-	-	1.2658	1.1968	0.02652	0.2355	4.9169	4.7905	4.4402	4.4433	4.7422	4.2529	4.2891	4.1914	4.6328	4.2924
pos_2412	(+/-)-Ribaline	metab_1561	yes	-	pos	41234-32-6	293.149	3.42407	M+NH4	C15H17NO4	0	34.3	HMDB0033345	-	-	-	-	-	Organoheterocyclic compounds	Quinolines and derivatives	Dihydrofuranoquinolines	0	34.3	-	-	1.1676	1.1014	0.002086	0.1425	4.8159	4.7324	4.8927	4.8899	4.8635	4.649	4.7075	4.5895	4.7317	4.64
neg_1241	Quetiapine Sulfoxide	metab_8025	yes	-	neg	-	434.13	2.74013	M+Cl	C21H25N3O3S	0	33.8	HMDB0257023	-	-	-	-	-	Organoheterocyclic compounds	Benzothiazepines	Dibenzothiazepines	0	33.8	-	-	2.0069	1.9436	0.0408	0.266	4.0609	3.6109	4.3431	4.2761	3.563	4.4663	5.5412	5.3627	5.1429	3.7794
neg_365	Clozapine	metab_10689	yes	C06924	neg	5786-21-0	371.128	5.69313	M-H2O-H, M+FA-H	C18H19ClN4	0	35	HMDB0014507	-	-	-	-	-	Organoheterocyclic compounds	Benzodiazepines	Dibenzodiazepines	0	35	-	-	1.3341	1.3274	0.01917	0.215	6.223	6.5616	6.8761	6.7092	6.6816	6.0555	6.4742	6.3237	6.1432	6.0704
pos_6768	2-Amino-4-methylsulfanylbutanal	metab_6355	yes	-	pos	-	134.063	3.06492	M+H	C5H11NOS	0	45.4	HMDB0258128	-	-	-	-	-	Organosulfur compounds	Thioethers	Dialkylthioethers	0	45.4	-	-	2.5148	2.4307	0.02674	0.33	3.2625	3.1272	4.1146	3.5148	5.1624	2.8283	2.9261	2.5499	2.9317	2.8186
neg_7062	Psoralidin	metab_14467	yes	C10523	neg	18642-23-4	357.076	3.2331	M+Na-2H	C20H16O5	0	42.2	HMDB0034050;LMPK12090007;MJDBOTE0001199	-	-	-	-	-	Phenylpropanoids and polyketides	Isoflavonoids	Coumestans	0	42.2	-	-	1.0734	1.0315	0.009492	0.1942	5.7943	5.6767	5.7652	5.977	5.7219	5.549	5.5318	5.4365	5.6176	5.6811
pos_3659	7alpha,12alpha-Dihydroxycholest-4-en-3-one	metab_2929	yes	C17339	pos	-	399.325	6.82223	M+H-H2O	C27H44O3	0	49.5	HMDB0247407;LMST04030114	-	-	map01100;map00120	Metabolism;Metabolism	Global and overview maps;Lipid metabolism	Lipids and lipid-like molecules	Steroids and steroid derivatives	Cholestane steroids	0	49.5	Metabolic pathways;Primary bile acid biosynthesis	Metabolic pathways;Primary bile acid biosynthesis	1.5428	1.487	0.003858	0.1817	6.1613	5.9735	5.9516	6.1033	6.1961	6.4119	6.515	6.5688	6.2059	6.3248
pos_3551	Cholestanol	metab_2813	yes	-	pos	360-68-9;80-97-7	411.361	6.44852	M+Na	C27H48O	3.94	0	HMDB0000908;HMDB0000577;HMDB0250160	-	-	-	-	-	Lipids and lipid-like molecules	Steroids and steroid derivatives	Cholestane steroids	3.94	0	-	-	1.8426	1.7451	0.003494	0.1716	6.6006	6.591	6.9399	6.8304	6.4154	6.2447	6.2737	5.9902	6.3197	6.2868
neg_3448	5-alpha-Cholestane-3-beta,5,6-beta-triol, 6-acetate 3-(hydrogen succinate)	metab_10466	yes	-	neg	-	607.385	6.51547	M+FA-H	C33H54O7	0	41.5	HMDB0260315	-	-	-	-	-	Lipids and lipid-like molecules	Steroids and steroid derivatives	Cholestane steroids	0	41.5	-	-	3.0338	2.971	0.000312	0.085	6.6824	6.8118	6.1731	6.4243	5.5695	5.072	4.4717	4.4432	5.0529	4.8208
neg_5909	5-(3-Methyl-1-triazeno)imidazole-4-carboxamide	metab_13191	yes	C16250	neg	-	203.046	4.45068	M+Cl	C5H8N6O	0	74.2	HMDB0254938	-	-	map07040	Drug Development	Chronology: Antineoplastics	Organic acids and derivatives	Carboxylic acids and derivatives	Carboxylic acid derivatives	0	74.2	Antineoplastics - alkylating agents	Antineoplastics - alkylating agents	1.1205	1.1124	0.02696	0.2355	4.8468	4.9369	4.985	5.2609	4.6226	4.6819	4.6545	4.5782	4.5806	4.7124
neg_6456	2-Hydroxypropyl methacrylamide	metab_13795	yes	-	neg	-	188.092	3.8165	M+FA-H	C7H13NO2	0	42.7	HMDB0245163;HMDB0254991	-	-	-	-	-	Organic acids and derivatives	Carboxylic acids and derivatives	Carboxylic acid derivatives	0	42.7	-	-	1.684	1.6025	0.01299	0.1942	4.6623	4.938	4.8287	4.7865	5.2868	3.9439	4.3271	4.1931	4.7186	4.5678
pos_7516	N8-Acetylspermidine	metab_7177	yes	C01029	pos	13431-24-8	188.176	0.875	M+H	C9H21N3O	73.2	0	HMDB0002189	-	-	-	-	-	Organic acids and derivatives	Carboximidic acids and derivatives	Carboximidic acids	73.2	0	-	-	2.2703	2.1361	0.01259	0.2617	5.916	6.2649	6.8951	6.7887	6.7103	5.6811	5.9142	5.275	5.9612	6.048
neg_7259	Deoxyribose	metab_14682	yes	C01801	neg	533-67-5	133.05	1.5968	M-H	C5H10O4	63.5	0	HMDB0245099;HMDB0003224	Carbohydrates	Monosaccharides	map01100;map00030	Metabolism;Metabolism	Global and overview maps;Carbohydrate metabolism	Organic oxygen compounds	Organooxygen compounds	Carbonyl compounds	63.5	0	Metabolic pathways;Pentose phosphate pathway	Metabolic pathways;Pentose phosphate pathway	1.4277	1.4157	0.03118	0.2443	6.1739	6.2881	6.9568	6.9169	6.2789	5.8538	6.1232	5.9651	6.2365	6.0559
neg_2384	N'-Formylkynurenine	metab_15383	yes	C02700	neg	1022-31-7	271.047	4.68332	M+Cl	C11H12N2O4	0	54.4	HMDB0001200;PW_C000935;HMDB0060485	-	-	map01100;map00380;map01240	Metabolism;Metabolism;Metabolism	Global and overview maps;Amino acid metabolism;Global and overview maps	Organic oxygen compounds	Organooxygen compounds	Carbonyl compounds	0	54.4	Metabolic pathways;Tryptophan metabolism;Biosynthesis of cofactors	Metabolic pathways;Tryptophan metabolism;Biosynthesis of cofactors	1.286	1.2914	0.0004338	0.08538	6.6105	6.5449	6.7051	6.6613	6.4241	6.3162	6.3274	6.2972	6.2409	6.2899
neg_6371	5-Hydroxy-N-formylkynurenine	metab_13701	yes	C05648	neg	-	251.067	3.8954	M-H	C11H12N2O5	0	51.7	PW_C002055;HMDB0004086	-	-	map01100;map00380	Metabolism;Metabolism	Global and overview maps;Amino acid metabolism	Organic oxygen compounds	Organooxygen compounds	Carbonyl compounds	0	51.7	Metabolic pathways;Tryptophan metabolism	Metabolic pathways;Tryptophan metabolism	1.3846	1.3587	0.005453	0.1756	5.5312	5.3613	5.677	5.4545	5.5732	4.8485	5.2994	5.1702	5.3033	5.1098
neg_4814	3-Hydroxykynurenamine	metab_11978	yes	C05636	neg	-	359.171	5.95487	2M-H	C9H12N2O2	0	31.8	HMDB0060281	-	-	map00380	Metabolism	Amino acid metabolism	Organic oxygen compounds	Organooxygen compounds	Carbonyl compounds	0	31.8	Tryptophan metabolism	Tryptophan metabolism	1.8677	1.8454	0.01813	0.2117	6.0322	5.9392	5.6262	6.0746	6.0188	4.4568	5.7687	5.6585	5.1185	4.882
pos_1234	Ethanone, 1-(4-butylphenyl)-	metab_261	yes	-	pos	-	159.117	6.25773	M+H-H2O, M+H	C12H16O	0	49.4	HMDB0246227	-	-	-	-	-	Organic oxygen compounds	Organooxygen compounds	Carbonyl compounds	0	49.4	-	-	1.243	1.1625	0.004695	0.1881	6.3528	6.3286	6.3869	6.1037	6.3463	6.5475	6.5105	6.4809	6.4786	6.5176
pos_2888	5-O-Methylembelin	metab_2083	yes	C10373	pos	56005-10-8	353.17	4.61572	M+2Na-H	C18H28O4	0	36.9	LMPK15050007;HMDB0040867	-	-	-	-	-	Organic oxygen compounds	Organooxygen compounds	Carbonyl compounds	0	36.9	-	-	1.2716	1.2391	0.004958	0.1909	5.0972	5.0213	5.2978	4.994	5.2189	4.8652	4.8696	4.8935	4.8865	4.9567
pos_2989	4-Hydroxy-6-methyl-3-(1-oxobutyl)-2H-pyran-2-one	metab_2195	yes	-	pos	22073-85-4	214.107	4.94572	M+NH4	C10H12O4	0	37.9	HMDB0040637	-	-	-	-	-	Organic oxygen compounds	Organooxygen compounds	Carbonyl compounds	0	37.9	-	-	1.2562	1.1737	0.006426	0.2129	5.2695	5.1847	5.1683	5.4128	5.3005	5.0542	5.0059	4.9531	5.1789	5.0801
pos_3834	Benzoyl-l-arg	metab_3120	yes	-	pos	-	579.27	7.64842	2M+Na	C13H18N4O3	0	32.9	HMDB0249044	-	-	-	-	-	Organic oxygen compounds	Organooxygen compounds	Carbonyl compounds	0	32.9	-	-	1.6055	1.5769	0.02402	0.3215	5.1377	5.3834	5.4058	5.7968	5.9518	5.9334	5.9356	6.0424	6.0284	5.8516
pos_6256	Ethinamate	metab_5791	yes	C07832	pos	126-52-3	185.129	3.80997	M+NH4	C9H13NO2	0	35.1	HMDB0015165	-	-	-	-	-	Organic oxygen compounds	Organooxygen compounds	Carbonyl compounds	0	35.1	-	-	1.5811	1.5132	0.01574	0.2814	5.997	5.8897	5.7757	5.905	5.6765	5.6452	5.2795	5.1359	5.6373	5.6609
pos_732	Inproquone	metab_6963	yes	-	pos	-	307.165	4.96173	M+H, M+Na	C16H22N2O4	0	32.3	HMDB0253499	-	-	-	-	-	Organic oxygen compounds	Organooxygen compounds	Carbonyl compounds	0	32.3	-	-	1.2209	1.1761	0.002572	0.1502	6.3108	6.1994	6.2677	6.2181	6.3577	6.1786	6.0543	5.9713	6.024	6.1202
neg_2505	Enol-3-Ethyl-1,2-cyclopentanedione	metab_9424	yes	-	neg	21835-01-8	171.065	4.92777	M+FA-H	C7H10O2	0	32	HMDB0031223	-	-	-	-	-	Organic oxygen compounds	Organooxygen compounds	Carbonyl compounds	0	32	-	-	1.2802	1.2549	0.0009585	0.1111	5.2521	5.1926	5.1232	5.3257	5.0862	4.8287	5.0187	4.8489	4.8589	4.9705
neg_3297	Embelin	metab_10298	yes	C10342	neg	550-24-3	293.176	6.25042	M-H	C17H26O4	0	42.6	HMDB0251767;LMPK15050006	-	-	-	-	-	Organic oxygen compounds	Organooxygen compounds	Carbonyl compounds	0	42.6	-	-	2.3296	2.2868	0.00161	0.1195	5.4071	5.4091	5.4158	5.8195	4.9239	3.9034	4.7033	4.2389	4.4161	4.764
neg_4408	8-Nonen-2-one	metab_11528	yes	-	neg	5009-32-5	279.233	6.48417	2M-H	C9H16O	0	54.3	HMDB0035926;LMFA12000145	-	-	-	-	-	Organic oxygen compounds	Organooxygen compounds	Carbonyl compounds	0	54.3	-	-	2.8549	2.7869	0.00143	0.1177	5.4536	5.0679	6.3929	6.3409	6.1645	4.0335	4.8205	4.369	4.7412	4.1542
neg_4509	(E)-3-nonenal	metab_11640	yes	-	neg	-	279.233	6.35145	2M-H	C9H16O	0	62.9	HMDB0303858	-	-	-	-	-	Organic oxygen compounds	Organooxygen compounds	Carbonyl compounds	0	62.9	-	-	3.0356	2.9725	0.001443	0.1177	5.5351	4.9141	6.6301	6.5294	6.2713	4.4042	4.3315	3.9633	4.3669	4.6293
pos_5806	Prulaurasin	metab_5291	yes	C00844	pos	138-53-4;99-18-3	337.139	4.61572	M+ACN+H	C14H17NO6	0	35.8	HMDB0034934;HMDB0035022	-	-	map00460;map01100;map01110	Metabolism;Metabolism;Metabolism	Metabolism of other amino acids;Global and overview maps;Global and overview maps	Organic oxygen compounds	Organooxygen compounds	Carbohydrates and carbohydrate conjugates	0	35.8	Cyanoamino acid metabolism;Metabolic pathways;Biosynthesis of secondary metabolites	Cyanoamino acid metabolism;Metabolic pathways;Biosynthesis of secondary metabolites	1.2323	1.2294	0.02221	0.3157	5.2045	5.2684	5.5337	5.0485	5.3623	5.0623	4.855	5.0462	5.1224	5.0251
neg_1605	Beta-D-ribosylnicotinate	metab_8428	yes	C05841	neg	4013-06-03	236.056	3.54882	M-H2O-H	C11H13NO6	0	50.4	HMDB0304540;HMDB0006809	-	-	map01100;map00760	Metabolism;Metabolism	Global and overview maps;Metabolism of cofactors and vitamins	Organic oxygen compounds	Organooxygen compounds	Carbohydrates and carbohydrate conjugates	0	50.4	Metabolic pathways;Nicotinate and nicotinamide metabolism	Metabolic pathways;Nicotinate and nicotinamide metabolism	2.146	2.0456	0.0009213	0.1111	4.698	4.5384	4.5607	4.6898	5.0371	3.633	3.7726	3.8102	4.2749	4.1625
neg_7258	Glucosamine	metab_15376	yes	C00329	neg	14257-69-3;3416-24-8	160.061	1.62027	M-H2O-H	C6H13NO5	0	54.6	HMDB0242589;HMDB0001514;HMDB0245095;HMDB0030091;PW_C001167	Carbohydrates	Monosaccharides	map01100;map00520;map02060	Metabolism;Metabolism;Environmental Information Processing	Global and overview maps;Carbohydrate metabolism;Membrane transport	Organic oxygen compounds	Organooxygen compounds	Carbohydrates and carbohydrate conjugates	0	54.6	Metabolic pathways;Amino sugar and nucleotide sugar metabolism;Phosphotransferase system (PTS)	Metabolic pathways;Amino sugar and nucleotide sugar metabolism;Phosphotransferase system (PTS)	1.1912	1.1521	0.009713	0.1942	6.0702	6.1163	6.1825	6.3314	6.3101	5.7282	6.1096	5.8442	5.9759	5.9583
pos_2544	Tyramine glucuronide	metab_1707	yes	C03033	pos	27972-85-6	278.102	3.71343	M+H-2H2O	C14H19NO7	0	77.6	HMDB0010328	-	-	map01100;map00040;map04976;map00053;map01240	Metabolism;Metabolism;Organismal Systems;Metabolism;Metabolism	Global and overview maps;Carbohydrate metabolism;Digestive system;Carbohydrate metabolism;Global and overview maps	Organic oxygen compounds	Organooxygen compounds	Carbohydrates and carbohydrate conjugates	0	77.6	Metabolic pathways;Pentose and glucuronate interconversions;Bile secretion;Ascorbate and aldarate metabolism;Biosynthesis of cofactors	Metabolic pathways;Pentose and glucuronate interconversions;Bile secretion;Ascorbate and aldarate metabolism;Biosynthesis of cofactors	1.3286	1.3241	0.04054	0.3816	4.5004	4.5664	4.8414	4.3712	4.4575	3.9592	4.1309	4.5546	4.3644	4.122
pos_78	Xylobiose	metab_7452	yes	C01630	pos	6860-47-5	283.101	0.9301	M+H, M+K, M+Na	C10H18O9	0	32.6	HMDB0029894	Carbohydrates	Oligosaccharides	map02010	Environmental Information Processing	Membrane transport	Organic oxygen compounds	Organooxygen compounds	Carbohydrates and carbohydrate conjugates	0	32.6	ABC transporters	ABC transporters	1.9944	1.943	0.01575	0.2814	5.7388	4.7119	5.1819	5.5963	5.0627	5.9715	6.0487	6.0059	5.773	5.6012
pos_2770	Minoxidil Glucuronide	metab_1955	yes	-	pos	-	350.146	4.29402	M+H-2H2O	C15H23N5O7	0	68	HMDB0254740	-	-	-	-	-	Organic oxygen compounds	Organooxygen compounds	Carbohydrates and carbohydrate conjugates	0	68	-	-	1.4212	1.3461	0.006126	0.2088	4.8827	4.7	4.8923	4.9145	4.884	4.3582	4.6222	4.6395	4.7381	4.5329
pos_3099	Neohesperidoside	metab_2318	yes	C08244	pos	-	359.158	5.28178	M+CH3OH+H	C12H22O10	0	40.9	HMDB0302540	-	-	-	-	-	Organic oxygen compounds	Organooxygen compounds	Carbohydrates and carbohydrate conjugates	0	40.9	-	-	1.1794	1.1591	0.02571	0.33	5.3309	5.4636	5.3173	5.3902	5.3358	5.4518	5.9115	5.6252	5.5256	5.5036
pos_6332	Cellulose, microcrystalline	metab_5876	yes	-	pos	9004-34-6	415.117	3.67295	M+2Na-H	C14H26O11	0	48.8	HMDB0032197	-	-	-	-	-	Organic oxygen compounds	Organooxygen compounds	Carbohydrates and carbohydrate conjugates	0	48.8	-	-	1.9832	1.8861	0.0461	0.3955	4.895	4.6448	5.2316	4.8745	5.296	3.3269	4.6459	4.584	4.6386	4.4415
pos_7181	Ribonolactone	metab_6814	yes	C02674	pos	5336-08-03	190.071	2.54032	M+ACN+H	C5H8O5	0	46.7	HMDB0001900	-	-	-	-	-	Organic oxygen compounds	Organooxygen compounds	Carbohydrates and carbohydrate conjugates	0	46.7	-	-	2.651	2.4994	0.0122	0.2602	4.9274	5.0065	5.8741	5.3628	4.936	3.2696	4.551	4.1619	4.7648	4.2932
neg_1391	B-D-Xylopyranosyl-(1->4)-a-L-rhamnopyranosyl-(1->2)-L-arabinose	metab_8191	yes	-	neg	-	427.147	3.31198	M-H	C16H28O13	0	55.3	HMDB0041221	-	-	-	-	-	Organic oxygen compounds	Organooxygen compounds	Carbohydrates and carbohydrate conjugates	0	55.3	-	-	2.6947	2.669	0.000106	0.05579	3.6544	3.7032	3.7066	3.8376	3.8196	4.3934	5.3944	5.092	4.9656	4.8248
neg_2309	N,O-Didesmethylvenlafaxine glucuronide	metab_9208	yes	-	neg	1021933-99-2	446.178	4.54393	M+Na-2H	C21H31NO8	0	77.7	HMDB0061167;PW_C040612	-	-	-	-	-	Organic oxygen compounds	Organooxygen compounds	Carbohydrates and carbohydrate conjugates	0	77.7	-	-	1.4938	1.5054	0.04651	0.266	5.7675	5.7413	5.5015	4.8577	5.0564	4.4891	4.9156	5.2582	4.9932	4.4033
neg_2825	2-Phenylethyl beta-D-glucopyranoside	metab_9778	yes	-	neg	18997-54-1	329.124	5.46432	M+FA-H	C14H20O6	0	34.4	HMDB0029819	-	-	-	-	-	Organic oxygen compounds	Organooxygen compounds	Carbohydrates and carbohydrate conjugates	0	34.4	-	-	3.1998	3.2016	0.02323	0.2231	4.7823	4.7728	4.2952	5.0086	5.2484	1.023	4.8387	4.0986	1.2697	1.1336
neg_6789	2,3-Butanediol apiosylglucoside	metab_14162	yes	-	neg	-	383.157	3.46212	M-H	C15H28O11	0	41.4	HMDB0033063	-	-	-	-	-	Organic oxygen compounds	Organooxygen compounds	Carbohydrates and carbohydrate conjugates	0	41.4	-	-	2.4791	2.3822	0.003409	0.1567	5.0696	4.6674	4.7172	4.0001	3.5978	5.4131	5.5121	5.4872	5.5848	5.5681
neg_7315	N-Acetyl-9-O-acetylneuraminic acid	metab_14745	yes	-	neg	55717-54-9	350.109	1.24373	M-H	C13H21NO10	0	46.2	HMDB0000794	-	-	-	-	-	Organic oxygen compounds	Organooxygen compounds	Carbohydrates and carbohydrate conjugates	0	46.2	-	-	2.2309	2.235	0.02574	0.2318	3.6575	5.6137	3.7096	4.905	3.9017	5.319	5.6172	5.6478	5.1192	5.5487
neg_2595	6,7,12,13-Tetrahydro-5H-indolo[2,3-a]pyrrolo[3,4-c]carbazol-5-one	metab_9523	yes	-	neg	-	346.078	5.08628	M+Cl	C20H13N3O	0	46.6	HMDB0260295	-	-	-	-	-	Organoheterocyclic compounds	Indoles and derivatives	Carbazoles	0	46.6	-	-	3.4007	3.3347	0.001567	0.1179	1.8138	1.8619	3.7968	1.9948	1.977	3.9158	3.8033	4.3541	4.9562	4.6148
pos_5587	Ecdysone	metab_5050	yes	C00477	pos	3604-87-3	447.31	5.07375	M+H-H2O	C27H44O6	0	70.9	HMDB0251684;LMST01010210	Steroids;Hormones and transmitters	27-Carbon atoms;Steroid hormones	map00981;map04214	Metabolism;Cellular Processes	Metabolism of terpenoids and polyketides;Cell growth and death	Lipids and lipid-like molecules	Steroids and steroid derivatives	Bile acids, alcohols and derivatives	0	70.9	Insect hormone biosynthesis;Apoptosis - fly	Insect hormone biosynthesis;Apoptosis - fly	2.8057	2.711	0.0006831	0.07293	4.7381	4.1196	4.8247	4.586	3.9957	5.6458	5.5164	5.1376	5.4762	5.4985
neg_3340	3-epi-6-deoxocathasterone	metab_10347	yes	C16251	neg	-	463.379	6.3358	M+FA-H	C28H50O2	0	50.8	LMST01031120;HMDB0304128	-	-	map00905	Metabolism	Metabolism of terpenoids and polyketides	Lipids and lipid-like molecules	Steroids and steroid derivatives	Bile acids, alcohols and derivatives	0	50.8	Brassinosteroid biosynthesis	Brassinosteroid biosynthesis	2.0015	1.9593	0.00387	0.1624	6.3362	6.3232	6.7434	6.8204	6.06	5.4636	5.8872	5.3287	5.9346	5.8692
neg_4381	7alpha-Hydroxy-3-oxo-4-cholestenoate	metab_11498	yes	C17337	neg	115538-85-7	429.297	6.51547	M-H	C27H42O4	0	80.3	HMDB0012458;PW_C007985	-	-	map00120	Metabolism	Lipid metabolism	Lipids and lipid-like molecules	Steroids and steroid derivatives	Bile acids, alcohols and derivatives	0	80.3	Primary bile acid biosynthesis	Primary bile acid biosynthesis	1.7181	1.6525	0.0037	0.1611	7.0528	6.9596	6.5472	7.0484	6.6961	6.1724	6.395	6.0848	6.3922	6.5644
neg_4513	6-deoxoteasterone	metab_11645	yes	C15799	neg	-	479.374	6.34362	M+FA-H	C28H50O3	0	61.2	HMDB0304225;LMST01030120	-	-	map01100;map00905;map01110	Metabolism;Metabolism;Metabolism	Global and overview maps;Metabolism of terpenoids and polyketides;Global and overview maps	Lipids and lipid-like molecules	Steroids and steroid derivatives	Bile acids, alcohols and derivatives	0	61.2	Metabolic pathways;Brassinosteroid biosynthesis;Biosynthesis of secondary metabolites	Metabolic pathways;Brassinosteroid biosynthesis;Biosynthesis of secondary metabolites	1.8408	1.7835	0.009706	0.1942	6.9297	6.9499	7.1179	7.4973	6.564	6.4672	6.3029	5.866	6.6234	6.4426
neg_4578	6-Deoxocastasterone	metab_11716	yes	C15802	neg	87833-54-3	495.369	6.25042	M+FA-H	C28H50O4	0	45.3	HMDB0033984;LMST01030127	-	-	map01100;map00905;map01110	Metabolism;Metabolism;Metabolism	Global and overview maps;Metabolism of terpenoids and polyketides;Global and overview maps	Lipids and lipid-like molecules	Steroids and steroid derivatives	Bile acids, alcohols and derivatives	0	45.3	Metabolic pathways;Brassinosteroid biosynthesis;Biosynthesis of secondary metabolites	Metabolic pathways;Brassinosteroid biosynthesis;Biosynthesis of secondary metabolites	2.2544	2.2402	0.03075	0.2437	6.4306	6.4173	6.5427	7.1377	4.6651	5.3984	4.726	4.5713	5.082	5.4915
neg_470	3-Dehydroteasterone	metab_11851	yes	C15792	neg	124853-28-7	445.332	6.67192	M-H, M+Na-2H	C28H46O4	0	72.5	HMDB0041527;LMST01030131	-	-	map01100;map00905;map01110	Metabolism;Metabolism;Metabolism	Global and overview maps;Metabolism of terpenoids and polyketides;Global and overview maps	Lipids and lipid-like molecules	Steroids and steroid derivatives	Bile acids, alcohols and derivatives	0	72.5	Metabolic pathways;Brassinosteroid biosynthesis;Biosynthesis of secondary metabolites	Metabolic pathways;Brassinosteroid biosynthesis;Biosynthesis of secondary metabolites	1.2734	1.2551	0.04345	0.266	7.6962	7.6044	7.337	8.0162	7.3786	6.8434	7.4633	7.1955	7.3219	7.2832
pos_3583	Coprocholic acid	metab_2847	yes	-	pos	547-98-8	468.368	6.58388	M+NH4	C27H46O5	0	45.6	HMDB0000601	-	-	-	-	-	Lipids and lipid-like molecules	Steroids and steroid derivatives	Bile acids, alcohols and derivatives	0	45.6	-	-	2.4682	2.2961	0.01602	0.2837	5.8166	6.1223	5.2711	4.7233	5.7519	6.8737	6.4548	6.5143	5.9168	6.3297
pos_4098	(3a,5b)-24-oxo-24-[(2-sulfoethyl)amino]cholan-3-yl-b-D-Glucopyranosiduronic acid	metab_3412	yes	-	pos	99794-82-8	682.328	7.68803	M+Na	C32H53NO11S	0	52.4	HMDB0002429	-	-	-	-	-	Lipids and lipid-like molecules	Steroids and steroid derivatives	Bile acids, alcohols and derivatives	0	52.4	-	-	2.482	2.3161	0.004573	0.1871	4.3074	4.3209	4.3489	4.3518	4.4559	5.614	4.4723	5.5015	5.2664	4.9657
pos_4569	Ponasterone A	metab_3932	yes	C08835	pos	13408-56-5	447.308	6.5361	M+H-H2O	C27H44O6	0	63	HMDB0256697;LMST01010195	-	-	-	-	-	Lipids and lipid-like molecules	Steroids and steroid derivatives	Bile acids, alcohols and derivatives	0	63	-	-	1.3282	1.2271	0.02626	0.33	6.7521	6.4081	6.4055	6.7613	6.6807	6.1349	6.3684	6.3317	6.4367	6.4163
pos_4751	Norcholic acid	metab_4131	yes	-	pos	-	359.258	6.28965	M+H-2H2O	C23H38O5	0	82	LMST04060019;HMDB0255727	-	-	-	-	-	Lipids and lipid-like molecules	Steroids and steroid derivatives	Bile acids, alcohols and derivatives	0	82	-	-	1.6526	1.6089	0.0006886	0.07293	5.942	5.9061	5.6392	5.7542	5.8017	6.1826	6.1157	6.0371	6.2228	6.2256
pos_4834	3a,6b,7b,12b-Tetrahydroxy-5b-cholanoic acid	metab_4222	yes	-	pos	140852-41-1	442.316	6.21067	M+NH4	C24H40O6	0	76.6	HMDB0000377	-	-	-	-	-	Lipids and lipid-like molecules	Steroids and steroid derivatives	Bile acids, alcohols and derivatives	0	76.6	-	-	1.0951	1.1045	0.02093	0.3093	6.2597	6.2995	6.0069	6.3615	6.1795	6.4669	6.3973	6.3022	6.4518	6.4889
pos_4892	3alpha,7alpha,12alpha,24(S)-tetrahydroxy-5beta-cholestan-27-al	metab_4286	yes	-	pos	-	468.368	6.13907	M+NH4	C27H46O5	0	48.6	HMDB0062206	-	-	-	-	-	Lipids and lipid-like molecules	Steroids and steroid derivatives	Bile acids, alcohols and derivatives	0	48.6	-	-	1.4414	1.4085	0.01746	0.2945	5.5865	5.6919	5.5646	5.9346	5.3929	6.1295	5.787	5.9541	5.8629	6.0665
pos_4921	3-Oxo-4,6-choladienoic acid	metab_4319	yes	-	pos	88179-71-9	412.284	6.1152	M+ACN+H	C24H34O3	0	35.4	HMDB0000476	-	-	-	-	-	Lipids and lipid-like molecules	Steroids and steroid derivatives	Bile acids, alcohols and derivatives	0	35.4	-	-	1.837	1.7788	0.004396	0.1865	5.427	5.429	5.4093	5.3046	4.8851	5.8947	5.6888	5.5779	5.7784	5.8241
pos_5277	12-Ketodeoxycholic acid	metab_4710	yes	-	pos	5130-29-0	413.264	5.73148	M+Na	C24H38O4	0	60	HMDB0000328	-	-	-	-	-	Lipids and lipid-like molecules	Steroids and steroid derivatives	Bile acids, alcohols and derivatives	0	60	-	-	2.6005	2.5483	0.03483	0.3644	4.0003	3.5893	3.5535	4.2581	5.5923	4.7772	6.0112	6.0036	5.1569	4.8767
pos_864	3-Oxocholic acid	metab_7544	yes	-	pos	2304-89-4	424.305	6.1152	M+NH4, M+Na	C24H38O5	0	67.2	LMST04010443;HMDB0000502	-	-	-	-	-	Lipids and lipid-like molecules	Steroids and steroid derivatives	Bile acids, alcohols and derivatives	0	67.2	-	-	1.264	1.1827	0.02241	0.3157	7.3193	7.3432	7.3558	6.9627	7.1446	7.5357	7.3943	7.404	7.414	7.5631
pos_979	Deoxycholylphenylalanine	metab_7671	yes	-	pos	-	522.355	6.98103	M+H-H2O, M+ACN+Na	C33H49NO5	0	71.4	HMDB0242413	-	-	-	-	-	Lipids and lipid-like molecules	Steroids and steroid derivatives	Bile acids, alcohols and derivatives	0	71.4	-	-	1.6773	1.5878	0.01449	0.2712	7.1309	6.7353	6.5537	6.7078	6.7757	7.2042	6.85	7.3841	7.2033	7.3352
neg_3798	Taurochenodeoxycholate-7-sulfate	metab_10851	yes	-	neg	66874-12-2	578.246	7.60143	M-H	C26H45NO9S2	0	84.1	LMST05020030;HMDB0002498	-	-	-	-	-	Lipids and lipid-like molecules	Steroids and steroid derivatives	Bile acids, alcohols and derivatives	0	84.1	-	-	1.493	1.5013	0.01166	0.1942	6.6171	6.2694	6.1108	6.1729	5.78	5.7556	5.7743	5.801	5.7533	5.5033
neg_3957	Taurochenodeoxycholate-3-sulfate	metab_11027	yes	-	neg	67030-59-5	288.619	7.5936	M-2H	C26H45NO9S2	0	86.7	HMDB0002486;LMST05020029	-	-	-	-	-	Lipids and lipid-like molecules	Steroids and steroid derivatives	Bile acids, alcohols and derivatives	0	86.7	-	-	1.3515	1.3595	0.01282	0.1942	6.6212	6.3066	6.1732	6.2051	5.8844	5.8625	5.863	5.9109	5.868	5.7344
neg_598	2b,3a,7a,12a-Tetrahydroxy-5b-cholanoic acid	metab_13268	yes	-	neg	60696-60-8	405.264	6.1649	M-H2O-H, M+Na-2H	C24H40O6	0	51.8	HMDB0000316	-	-	-	-	-	Lipids and lipid-like molecules	Steroids and steroid derivatives	Bile acids, alcohols and derivatives	0	51.8	-	-	1.6747	1.6213	0.007439	0.1889	7.9139	8.1939	8.1986	8.4369	7.9031	7.5681	7.7083	7.2344	7.9274	7.4992
pos_5528	Scopolamine	metab_4985	yes	C01851	pos	51-34-3	321.18	5.19377	M+NH4	C17H21NO4	0	57.1	HMDB0003573;MJDBOTE0001028	-	-	map01100;map00960;map01064;map01110	Metabolism;Metabolism;Metabolism;Metabolism	Global and overview maps;Biosynthesis of other secondary metabolites;Chemical structure transformation maps;Global and overview maps	Organic acids and derivatives	Hydroxy acids and derivatives	Beta hydroxy acids and derivatives	0	57.1	Metabolic pathways;Tropane, piperidine and pyridine alkaloid biosynthesis;Biosynthesis of alkaloids derived from ornithine, lysine and nicotinic acid;Biosynthesis of secondary metabolites	Metabolic pathways;Tropane, piperidine and pyridine alkaloid biosynthesis;Biosynthesis of alkaloids derived from ornithine, lysine and nicotinic acid;Biosynthesis of secondary metabolites	1.0297	0.9935	0.04542	0.3938	5.2964	5.4555	5.3663	5.4544	5.4097	5.3798	5.1297	4.9807	5.3068	5.2723
neg_288	Norscopolamine	metab_9838	yes	-	neg	-	334.132	4.73097	M-H2O-H, M+FA-H	C16H19NO4	0	30.5	HMDB0255751	-	-	-	-	-	Organic acids and derivatives	Hydroxy acids and derivatives	Beta hydroxy acids and derivatives	0	30.5	-	-	2.1381	2.1067	0.01192	0.1942	4.3028	4.7209	4.3084	4.4746	4.8852	3.7355	4.5789	3.3268	3.2573	3.1121
pos_3078	(R)-Laudanidine	metab_2295	yes	C17592	pos	301-21-3	385.212	5.20977	M+ACN+H	C20H25NO4	0	39.7	HMDB0030211	-	-	map00950;map01110	Metabolism;Metabolism	Biosynthesis of other secondary metabolites;Global and overview maps	Organoheterocyclic compounds	Isoquinolines and derivatives	Benzylisoquinolines	0	39.7	Isoquinoline alkaloid biosynthesis;Biosynthesis of secondary metabolites	Isoquinoline alkaloid biosynthesis;Biosynthesis of secondary metabolites	2.7803	2.5857	0.02096	0.3093	5.2936	5.0949	4.0061	3.3404	4.8674	5.498	5.3455	6.2713	5.6552	5.5738
pos_5654	Norlaudanosoline	metab_7744	yes	C02916	pos	57073-15-1;4747-99-3	305.149	4.93772	M+NH4	C16H17NO4	0	60.1	HMDB0012486	-	-	map00950;map01110	Metabolism;Metabolism	Biosynthesis of other secondary metabolites;Global and overview maps	Organoheterocyclic compounds	Isoquinolines and derivatives	Benzylisoquinolines	0	60.1	Isoquinoline alkaloid biosynthesis;Biosynthesis of secondary metabolites	Isoquinoline alkaloid biosynthesis;Biosynthesis of secondary metabolites	1.1397	1.095	0.04358	0.3892	5.3738	5.356	5.4108	5.4219	5.8331	5.2294	5.3261	5.2084	5.2409	5.2912
neg_3497	Zipeprol	metab_10519	yes	-	neg	-	419.208	6.61715	M+Cl	C23H32N2O3	0	66.1	HMDB0260029	-	-	-	-	-	Benzenoids	Benzene and substituted derivatives	Benzylethers	0	66.1	-	-	2.545	2.5151	0.002067	0.129	4.718	5.1144	6.1665	5.4695	5.5666	3.9063	4.6064	4.2848	4.1723	4.027
pos_1207	2,5-Dimethylbenzaldehyde	metab_231	yes	-	pos	34341-29-2	135.08	6.32127	M+H, 2M+ACN+H	C9H10O	92.8	0	HMDB0032014	-	-	-	-	-	Benzenoids	Benzene and substituted derivatives	Benzoyl derivatives	92.8	0	-	-	1.0594	0.9922	0.02303	0.32	6.3806	6.2369	6.4267	6.3761	6.2157	6.0648	6.1633	6.0515	6.2405	6.2639
neg_2749	Phenacyl	metab_9693	yes	-	neg	-	119.049	5.33688	M-H	C8H8O	0	38.5	HMDB0256388	-	-	-	-	-	Benzenoids	Benzene and substituted derivatives	Benzoyl derivatives	0	38.5	-	-	1.2317	1.2194	0.02778	0.2355	5.8452	5.7187	5.5251	5.6459	5.1601	5.0572	5.1825	5.223	5.2734	5.4101
pos_5337	Citrusinine I	metab_4776	yes	-	pos	86680-32-2	319.129	5.587	M+NH4	C16H15NO5	0	62	HMDB0030374	-	-	-	-	-	Organoheterocyclic compounds	Quinolines and derivatives	Benzoquinolines	0	62	-	-	1.2272	1.166	0.02928	0.3402	5.1067	5.0284	4.7266	4.7992	4.9059	5.3141	5.0137	5.0931	5.0849	5.256
neg_5967	3-Hydroxybenzoic Acid	metab_13254	yes	C00587	neg	1999-06-09	137.023	4.3752	M-H	C7H6O3	79.5	0	HMDB0002466	-	-	map01220;map01120;map00624;map00623;map00362;map00400	Metabolism;Metabolism;Metabolism;Metabolism;Metabolism;Metabolism	Global and overview maps;Global and overview maps;Xenobiotics biodegradation and metabolism;Xenobiotics biodegradation and metabolism;Xenobiotics biodegradation and metabolism;Amino acid metabolism	Benzenoids	Benzene and substituted derivatives	Benzoic acids and derivatives	79.5	0	Degradation of aromatic compounds;Microbial metabolism in diverse environments;Polycyclic aromatic hydrocarbon degradation;Toluene degradation;Benzoate degradation;Phenylalanine, tyrosine and tryptophan biosynthesis	Degradation of aromatic compounds;Microbial metabolism in diverse environments;Polycyclic aromatic hydrocarbon degradation;Toluene degradation;Benzoate degradation;Phenylalanine, tyrosine and tryptophan biosynthesis	1.1981	1.155	0.008302	0.1931	6.1168	6.0529	5.8858	6.24	5.8991	5.6449	5.7552	5.6886	5.8493	5.8669
neg_5207	N-formylanthranilic acid	metab_12414	yes	C05653	neg	3342-77-6	164.034	5.51037	M-H	C8H7NO3	53.6	0	HMDB0004089	-	-	map01100;map00380	Metabolism;Metabolism	Global and overview maps;Amino acid metabolism	Benzenoids	Benzene and substituted derivatives	Benzoic acids and derivatives	53.6	0	Metabolic pathways;Tryptophan metabolism	Metabolic pathways;Tryptophan metabolism	1.4096	1.3301	0.007288	0.1889	5.2562	5.3586	5.3307	5.4276	5.7534	4.9756	4.919	5.0581	5.2316	5.1163
pos_5749	Cocaine-alcohol	metab_5228	yes	-	pos	-	337.175	4.73635	M+NH4	C17H21NO5	0	68.6	HMDB0250390	-	-	-	-	-	Benzenoids	Benzene and substituted derivatives	Benzoic acids and derivatives	0	68.6	-	-	1.0852	1.0322	0.01088	0.2594	5.8603	5.7187	5.6414	5.8474	5.8585	5.7047	5.5712	5.5656	5.6382	5.5951
neg_1655	Salicyluric Acid	metab_8483	yes	C07588	neg	487-54-7	194.045	3.61147	M-H	C9H9NO4	69.9	0	HMDB0000840	-	-	-	-	-	Benzenoids	Benzene and substituted derivatives	Benzoic acids and derivatives	69.9	0	-	-	1.5103	1.473	0.0007756	0.1111	4.9134	4.865	4.9179	5.0664	4.8892	4.2861	4.6438	4.5346	4.6631	4.5337
neg_4870	{1-[2-(4-Carbamimidoyl-benzoylamino)-propionyl]-piperidin-4-yloxy}-acetic acid	metab_12040	yes	-	neg	-	357.156	5.92348	M-H2O-H	C18H24N4O5	0	63.1	HMDB0257277	-	-	-	-	-	Benzenoids	Benzene and substituted derivatives	Benzoic acids and derivatives	0	63.1	-	-	2.2293	2.1783	0.001918	0.1284	6.3803	6.3023	5.9876	6.4401	6.3947	4.8666	5.9026	5.6199	5.4641	5.124
neg_5758	Flecainide	metab_13023	yes	C07001	neg	54143-55-4	395.121	4.65618	M-H2O-H	C17H20F6N2O3	0	43	HMDB0015326;PW_C009608	-	-	-	-	-	Benzenoids	Benzene and substituted derivatives	Benzoic acids and derivatives	0	43	-	-	1.4685	1.4848	0.01909	0.215	3.5319	3.9798	4.1687	3.9514	3.4456	3.0165	3.6118	3.3808	3.2823	3.3157
neg_815	2-(Malonylamino)benzoic acid	metab_15156	yes	C03147	neg	53947-84-5	222.04	3.27288	M-H2O-H, M-H	C10H9NO5	0	57	HMDB0039495	-	-	-	-	-	Benzenoids	Benzene and substituted derivatives	Benzoic acids and derivatives	0	57	-	-	1.5216	1.4338	0.009367	0.1942	6.5279	6.1528	6.184	6.5529	6.6755	5.9509	5.8514	5.8681	6.2389	6.0308
pos_2968	VASICINONE	metab_2172	yes	C10744	pos	486-64-6	235.108	4.88107	M+CH3OH+H	C11H10N2O2	0	59.4	HMDB0259770	-	-	-	-	-	Organoheterocyclic compounds	Diazanaphthalenes	Benzodiazines	0	59.4	-	-	1.2175	1.1971	0.01886	0.2951	5.0119	4.7136	4.8756	5.0807	4.779	5.2202	5.1407	5.1277	4.9711	5.197
neg_1491	1,4-Bisdesoxycyadox	metab_8302	yes	-	neg	-	220.064	3.42228	M-H2O-H	C12H9N5O	0	37.4	HMDB0244200	-	-	-	-	-	Organoheterocyclic compounds	Diazanaphthalenes	Benzodiazines	0	37.4	-	-	2.2098	2.0985	0.03996	0.266	4.0315	4.1505	3.9839	3.2364	5.7771	2.7895	3.1532	3.3201	3.5962	2.91
pos_3699	Isoetharine	metab_2973	yes	C07053	pos	530-08-5	496.34	6.97307	2M+NH4	C13H21NO3	0	44.7	HMDB0014366	-	-	-	-	-	Benzenoids	Phenols	Benzenediols	0	44.7	-	-	2.1453	2.0085	0.009402	0.2468	8.1964	7.7381	7.5318	7.5791	7.6563	8.5897	7.8703	8.6116	8.5844	8.2343
pos_5404	2-(2-Hydroxyethyl)phenyl hydrogen sulfate	metab_4851	yes	-	pos	-	260.058	5.44247	M+ACN+H	C8H10O5S	0	62	HMDB0304908	-	-	-	-	-	Organic acids and derivatives	Organic sulfuric acids and derivatives	Arylsulfates	0	62	-	-	1.1546	1.1317	0.02384	0.3207	4.423	4.7085	4.8324	4.4662	4.5143	4.3678	4.395	4.3679	4.302	4.3996
pos_3580	Estragole	metab_2844	yes	C10452	pos	140-67-0	149.096	6.5759	M+H	C10H12O	37.2	0	HMDB0034121;MJDBOTE0001746	-	-	map00940	Metabolism	Biosynthesis of other secondary metabolites	Benzenoids	Phenol ethers	Anisoles	37.2	0	Phenylpropanoid biosynthesis	Phenylpropanoid biosynthesis	1.3441	1.2733	0.007402	0.2153	6.6563	6.6114	6.7816	6.9364	6.6806	6.6018	6.4968	6.3879	6.5259	6.3965
pos_5685	4-Aminophenylacetic acid	metab_5157	yes	-	pos	-	303.134	4.87307	2M+H	C8H9NO2	0	49.5	HMDB0246358	-	-	-	-	-	Benzenoids	Benzene and substituted derivatives	Aniline and substituted anilines	0	49.5	-	-	1.3979	1.3418	0.03708	0.3696	5.0289	5.0892	4.6177	4.7934	5.3512	4.5563	4.7374	4.6038	4.6884	4.6696
neg_1799	OR-1855	metab_8642	yes	-	neg	-	238.075	3.80867	M+Cl	C11H13N3O	0	32.2	HMDB0060860	-	-	-	-	-	Benzenoids	Benzene and substituted derivatives	Aniline and substituted anilines	0	32.2	-	-	1.4196	1.3427	0.01066	0.1942	4.896	5.2821	4.7689	5.2623	5.0786	4.6571	4.537	4.5648	4.8112	4.8006
pos_4779	Androst-5-ene-3beta,17beta-diol	metab_4161	yes	C04295	pos	521-17-5	255.211	6.25773	M+H-2H2O	C19H30O2	0	51	HMDB0003818;HMDB0244754	Steroids	19-Carbon atoms	map00140;map04913	Metabolism;Organismal Systems	Lipid metabolism;Endocrine system	Lipids and lipid-like molecules	Steroids and steroid derivatives	Androstane steroids	0	51	Steroid hormone biosynthesis;Ovarian steroidogenesis	Steroid hormone biosynthesis;Ovarian steroidogenesis	1.2312	1.1643	0.04882	0.4051	6.0542	6.0109	6.1189	5.6098	5.812	6.2706	6.0717	6.015	6.2332	6.2581
pos_3185	7a-Hydroxytestosterone	metab_2414	yes	C05291	pos	2141-17-5	269.19	5.53912	M+H-2H2O	C19H28O3	0	74.7	HMDB0003956	Hormones and transmitters	Steroid hormones	map00140	Metabolism	Lipid metabolism	Lipids and lipid-like molecules	Steroids and steroid derivatives	Androstane steroids	0	74.7	Steroid hormone biosynthesis	Steroid hormone biosynthesis	1.6437	1.5662	0.01141	0.2594	4.8032	4.8992	4.6674	4.6118	4.8628	4.5646	4.4523	3.9544	4.4046	4.4874
pos_4867	16a-Hydroxydehydroisoandrosterone	metab_4258	yes	C05139	pos	1232-73-1	327.191	6.17085	M+Na	C19H28O3	0	36.7	HMDB0000352	-	-	map00140	Metabolism	Lipid metabolism	Lipids and lipid-like molecules	Steroids and steroid derivatives	Androstane steroids	0	36.7	Steroid hormone biosynthesis	Steroid hormone biosynthesis	2.1991	2.0695	0.00605	0.2074	5.7572	5.267	5.2107	5.5187	5.2334	4.7467	4.6351	4.2584	5.0365	5.0207
neg_4734	11beta,17beta-Dihydroxy-4-androsten-3-one	metab_11889	yes	C18075	neg	1816-85-9	349.202	6.0213	M+FA-H	C19H28O3	0	82.3	HMDB0060339	-	-	map00140	Metabolism	Lipid metabolism	Lipids and lipid-like molecules	Steroids and steroid derivatives	Androstane steroids	0	82.3	Steroid hormone biosynthesis	Steroid hormone biosynthesis	1.4708	1.4387	0.02843	0.237	6.8445	6.9108	6.5745	7.0717	6.1336	6.2969	6.2532	5.9094	6.2715	6.3666
pos_5316	19-Hydroxyandrost-4-ene-3,17-dione	metab_4753	yes	C05290	pos	510-64-5	347.16	5.6435	M+2Na-H	C19H26O3	0	33.8	PW_C002016;HMDB0003955;LMST02020067	-	-	map01100;map00140	Metabolism;Metabolism	Global and overview maps;Lipid metabolism	Lipids and lipid-like molecules	Steroids and steroid derivatives	Androstane steroids	0	33.8	Metabolic pathways;Steroid hormone biosynthesis	Metabolic pathways;Steroid hormone biosynthesis	1.3306	1.2901	0.04585	0.3955	4.8397	4.5676	4.0926	4.4243	4.656	4.8913	4.7174	4.7431	4.8598	4.9292
pos_2760	11-Hydroxyandrosterone	metab_1944	yes	C14606	pos	57-61-4	370.233	4.26998	M+ACN+Na	C19H30O3	0	50.7	HMDB0002984;LMST02020086	-	-	-	-	-	Lipids and lipid-like molecules	Steroids and steroid derivatives	Androstane steroids	0	50.7	-	-	2.0099	1.935	0.03799	0.3714	4.7817	4.6158	4.9794	4.7396	6.0784	5.6602	5.9044	5.8447	5.5408	5.6532
pos_5657	16-Oxoandrostenediol	metab_5126	yes	-	pos	1159-66-6	368.217	4.92907	M+ACN+Na	C19H28O3	0	31.7	HMDB0000322;LMST02020088	-	-	-	-	-	Lipids and lipid-like molecules	Steroids and steroid derivatives	Androstane steroids	0	31.7	-	-	1.1572	1.1162	0.02689	0.3302	5.7862	5.7659	5.6814	5.5323	5.4242	5.7462	5.9948	5.8259	5.8337	5.8816
neg_2513	2-Methoxy-5-methylaniline	metab_9433	yes	C19216	neg	-	182.082	4.94343	M+FA-H	C8H11NO	0	34.8	HMDB0245200	-	-	-	-	-	Benzenoids	Phenol ethers	Aminophenyl ethers	0	34.8	-	-	1.4734	1.4344	0.01123	0.1942	6.1692	5.9213	5.7804	6.0189	5.6027	5.6166	5.2386	5.2635	5.607	5.6112
neg_7247	N-Acetyl-L-Glutamic Acid	metab_14670	yes	C00624	neg	1188-37-0	188.056	1.75333	M-H	C7H11NO5	83	0	HMDB0001138;MJDBOTE0000638	-	-	map01100;map01210;map00220;map01110;map01230	Metabolism;Metabolism;Metabolism;Metabolism;Metabolism	Global and overview maps;Global and overview maps;Amino acid metabolism;Global and overview maps;Global and overview maps	Organic acids and derivatives	Carboxylic acids and derivatives	Amino acids, peptides, and analogues	83	0	Metabolic pathways;2-Oxocarboxylic acid metabolism;Arginine biosynthesis;Biosynthesis of secondary metabolites;Biosynthesis of amino acids	Metabolic pathways;2-Oxocarboxylic acid metabolism;Arginine biosynthesis;Biosynthesis of secondary metabolites;Biosynthesis of amino acids	1.4866	1.4893	0.02804	0.2355	6.6977	6.8142	7.1644	6.9787	6.992	5.7902	6.7648	6.5915	6.6222	6.3358
pos_6336	N-Acetyl-L-glutamate 5-semialdehyde	metab_5880	yes	C01250	pos	13074-21-0	138.055	3.67295	M+H-2H2O	C7H11NO4	0	53.9	HMDB0006488	-	-	map01100;map00220;map01110;map01210;map00330;map01230	Metabolism;Metabolism;Metabolism;Metabolism;Metabolism;Metabolism	Global and overview maps;Amino acid metabolism;Global and overview maps;Global and overview maps;Amino acid metabolism;Global and overview maps	Organic acids and derivatives	Carboxylic acids and derivatives	Amino acids, peptides, and analogues	0	53.9	Metabolic pathways;Arginine biosynthesis;Biosynthesis of secondary metabolites;2-Oxocarboxylic acid metabolism;Arginine and proline metabolism;Biosynthesis of amino acids	Metabolic pathways;Arginine biosynthesis;Biosynthesis of secondary metabolites;2-Oxocarboxylic acid metabolism;Arginine and proline metabolism;Biosynthesis of amino acids	1.2195	1.1851	0.0006378	0.07248	5.1006	4.9399	4.9817	5.0191	5.0029	4.7724	4.8527	4.893	4.7969	4.7987
pos_6548	2-Aminohexanedioic Acid	metab_6113	yes	C00956	pos	1118-90-7	144.066	3.36037	M+H-H2O	C6H11NO4	43.6	0	HMDB0000510;HMDB0302754	-	-	map01100;map00310;map00311;map00300;map01210;map01230;map01110	Metabolism;Metabolism;Metabolism;Metabolism;Metabolism;Metabolism;Metabolism	Global and overview maps;Amino acid metabolism;Biosynthesis of other secondary metabolites;Amino acid metabolism;Global and overview maps;Global and overview maps;Global and overview maps	Organic acids and derivatives	Carboxylic acids and derivatives	Amino acids, peptides, and analogues	43.6	0	Metabolic pathways;Lysine degradation;Penicillin and cephalosporin biosynthesis;Lysine biosynthesis;2-Oxocarboxylic acid metabolism;Biosynthesis of amino acids;Biosynthesis of secondary metabolites	Metabolic pathways;Lysine degradation;Penicillin and cephalosporin biosynthesis;Lysine biosynthesis;2-Oxocarboxylic acid metabolism;Biosynthesis of amino acids;Biosynthesis of secondary metabolites	1.3563	1.3007	0.004686	0.1881	5.3765	5.6222	5.6691	5.4652	5.3844	5.1682	5.2678	5.2028	5.3057	5.2916
pos_2961	N-Acetyl-L-phenylalanine	metab_2165	yes	C03519	pos	2018-61-3	208.097	4.85707	M+H	C11H13NO3	91.6	0	HMDB0000512	-	-	map01100;map00360	Metabolism;Metabolism	Global and overview maps;Amino acid metabolism	Organic acids and derivatives	Carboxylic acids and derivatives	Amino acids, peptides, and analogues	91.6	0	Metabolic pathways;Phenylalanine metabolism	Metabolic pathways;Phenylalanine metabolism	1.8053	1.7209	0.0002117	0.0339	4.7755	4.9799	5.0605	4.9384	4.8537	4.4414	4.5723	4.4525	4.6409	4.5203
neg_1155	L-4-Hydroxyglutamate semialdehyde	metab_7929	yes	C05938	neg	-	128.034	1.56508	M-H2O-H	C5H9NO4	0	61.2	PW_C002808;HMDB0006556	-	-	map01100;map00330	Metabolism;Metabolism	Global and overview maps;Amino acid metabolism	Organic acids and derivatives	Carboxylic acids and derivatives	Amino acids, peptides, and analogues	0	61.2	Metabolic pathways;Arginine and proline metabolism	Metabolic pathways;Arginine and proline metabolism	1.209	1.1646	0.005534	0.1756	6.7266	6.8738	6.8482	7.0336	6.9901	6.4574	6.7131	6.5682	6.682	6.6868
neg_131	2-Aminoacrylic acid	metab_8101	yes	C02218	neg	1948-56-7;28453-71-6	233.078	0.9539	2M+Hac-H, 3M-H	C3H5NO2	0	34.7	PW_C001938;HMDB0003609	-	-	map01100;map00270	Metabolism;Metabolism	Global and overview maps;Amino acid metabolism	Organic acids and derivatives	Carboxylic acids and derivatives	Amino acids, peptides, and analogues	0	34.7	Metabolic pathways;Cysteine and methionine metabolism	Metabolic pathways;Cysteine and methionine metabolism	2.5315	2.4427	0.01387	0.195	5.0854	5.9438	5.0876	4.6374	6.1961	3.4607	3.8247	4.9055	4.6744	3.5814
neg_2971	(3S,5S)-3,5-Diaminohexanoate	metab_9939	yes	C01186	neg	17027-83-7	337.212	5.75437	2M+FA-H	C6H14N2O2	0	53.5	HMDB0012115	-	-	map01100;map00310	Metabolism;Metabolism	Global and overview maps;Amino acid metabolism	Organic acids and derivatives	Carboxylic acids and derivatives	Amino acids, peptides, and analogues	0	53.5	Metabolic pathways;Lysine degradation	Metabolic pathways;Lysine degradation	1.631	1.5788	0.02968	0.2394	4.6229	4.4049	4.368	4.5653	4.7824	4.81	5.7399	5.4868	4.9146	4.6849
neg_7214	2-Amino-4-oxopentanoic acid	metab_14634	yes	C03341	neg	-	130.05	1.88633	M-H	C5H9NO3	0	51.2	HMDB0244991;LMFA01060171	-	-	map01100	Metabolism	Global and overview maps	Organic acids and derivatives	Carboxylic acids and derivatives	Amino acids, peptides, and analogues	0	51.2	Metabolic pathways	Metabolic pathways	1.0541	1.0461	0.01858	0.2136	6.0044	6.0234	6.3246	6.3138	6.0404	5.7498	5.972	5.8782	5.9516	5.9318
pos_7393	L-Glutamic Acid	metab_7734	yes	C00025	pos	56-86-0;6893-26-1	189.087	1.22282	M+ACN+H	C5H9NO4	45.7	0	PW_C000095;HMDB0000148;HMDB0060475;HMDB0003339;MJDBOTE0000649	Peptides;Hormones and transmitters	Amino acids;Neurotransmitters	map00997;map01240;map01200;map00330;map00480;map00332;map04742;map00250;map05033;map04974;map04072;map04216;map00630;map00430;map04964;map02010;map00860;map04080;map05016;map05017;map05014;map04727;map01064;map04723;map05031;map04721;map01060;map01100;map00220;map04540;map01120;map01210;map00340;map00524;map01230;map04068;map05034;map01110;map00660;map04724;map05030;map00650;map00910;map02020;map…	Metabolism;Metabolism;Metabolism;Metabolism;Metabolism;Metabolism;Organismal Systems;Metabolism;Human Diseases;Organismal Systems;Environmental Information Processing;Cellular Processes;Metabolism;Metabolism;Organismal Systems;Environmental Information Processing;Metabolism;Environmental Information Processing;Human Diseases;Human Diseases;Human Diseases;Organismal Systems;Metabolism;Organismal S…	Biosynthesis of other secondary metabolites;Global and overview maps;Global and overview maps;Amino acid metabolism;Metabolism of other amino acids;Biosynthesis of other secondary metabolites;Sensory system;Amino acid metabolism;Substance dependence;Digestive system;Signal transduction;Cell growth and death;Carbohydrate metabolism;Metabolism of other amino acids;Excretory system;Membrane transpor…	Organic acids and derivatives	Carboxylic acids and derivatives	Amino acids, peptides, and analogues	45.7	0	Biosynthesis of various secondary metabolites - part 3;Biosynthesis of cofactors;Carbon metabolism;Arginine and proline metabolism;Glutathione metabolism;Carbapenem biosynthesis;Taste transduction;Alanine, aspartate and glutamate metabolism;Nicotine addiction;Protein digestion and absorption;Phospholipase D signaling pathway;Ferroptosis;Glyoxylate and dicarboxylate metabolism;Taurine and hypotaur…	Biosynthesis of various secondary metabolites - part 3;Biosynthesis of cofactors;Carbon metabolism;Arginine and proline metabolism;Glutathione metabolism;Carbapenem biosynthesis;Taste transduction;Alanine, aspartate and glutamate metabolism;Nicotine addiction;Protein digestion and absorption;Phospholipase D signaling pathway;Ferroptosis;Glyoxylate and dicarboxylate metabolism;Taurine and hypotaur…	2.4027	2.2992	0.03181	0.3533	4.7878	5.2208	5.573	4.8282	6.081	3.7942	4.803	3.6967	4.6498	4.9256
neg_6766	Phenylacetylglutamine	metab_15387	yes	C04148	neg	28047-15-6	309.109	3.48562	M+FA-H	C13H16N2O4	0	71.3	PW_C002728;HMDB0006344;HMDB0062645;MJDBOTE0000584	-	-	map00360	Metabolism	Amino acid metabolism	Organic acids and derivatives	Carboxylic acids and derivatives	Amino acids, peptides, and analogues	0	71.3	Phenylalanine metabolism	Phenylalanine metabolism	1.6427	1.6093	0.01442	0.197	6.1396	6.1774	6.4278	6.0787	5.9923	5.3196	5.0935	5.9181	5.9219	5.729
pos_2999	Norfloxacin	metab_2206	yes	C06687	pos	70458-96-7	337.165	4.96975	M+NH4	C16H18FN3O3	0	55.5	HMDB0015192	Antibiotics	Quinolones	map02010	Environmental Information Processing	Membrane transport	Organic acids and derivatives	Carboxylic acids and derivatives	Amino acids, peptides, and analogues	0	55.5	ABC transporters	ABC transporters	1.8948	1.8266	0.005264	0.1919	4.4718	4.6766	4.8195	4.9033	4.8107	5.2568	5.4519	5.4326	4.8367	5.246
pos_2024	Isoputreanine	metab_1135	yes	-	pos	66165-33-1	343.234	2.60413	2M+Na	C7H16N2O2	0	30.9	HMDB0006009	-	-	-	-	-	Organic acids and derivatives	Carboxylic acids and derivatives	Amino acids, peptides, and analogues	0	30.9	-	-	2.3878	2.267	0.03887	0.3754	3.6184	3.4619	3.7669	3.4928	5.2727	5.0159	4.9244	5.3303	4.2658	4.8075
pos_2046	Glycylproline	metab_1159	yes	-	pos	704-15-4	214.119	2.66798	M+ACN+H	C7H12N2O3	0	75.5	HMDB0000721	-	-	-	-	-	Organic acids and derivatives	Carboxylic acids and derivatives	Amino acids, peptides, and analogues	0	75.5	-	-	1.2306	1.2069	0.04214	0.3869	5.2801	5.2347	5.1739	4.9046	4.9477	4.5791	4.8426	5.0167	5.0023	4.7454
pos_2099	Pro-Pro-Pro	metab_1216	yes	-	pos	-	310.176	2.77185	M+H	C15H23N3O4	0	57.3	HMDB0256689	-	-	-	-	-	Organic acids and derivatives	Carboxylic acids and derivatives	Amino acids, peptides, and analogues	0	57.3	-	-	2.008	1.9357	0.00357	0.1716	5.3624	5.0175	5.2162	5.2087	5.2466	5.576	6.0144	6.0959	5.461	5.6734
pos_2172	Gamma-Glutamyltyrosine	metab_1297	yes	-	pos	7432-23-7	311.124	2.9057	M+H	C14H18N2O6	92.5	0	HMDB0011741	-	-	-	-	-	Organic acids and derivatives	Carboxylic acids and derivatives	Amino acids, peptides, and analogues	92.5	0	-	-	1.6422	1.6242	0.0235	0.3207	5.9415	6.005	6.2208	5.7498	6.0007	5.2347	5.1751	5.9237	5.7572	5.5474
pos_2347	Glucitol-lysine	metab_1489	yes	-	pos	-	275.16	3.25738	M+H-2H2O	C12H26N2O7	0	55.3	HMDB0252764	-	-	-	-	-	Organic acids and derivatives	Carboxylic acids and derivatives	Amino acids, peptides, and analogues	0	55.3	-	-	1.3874	1.3463	0.02203	0.3149	4.1594	4.3693	4.4412	4.3867	4.4163	4.6614	4.9894	4.6809	4.3705	4.6347
pos_2479	Leucyl-Glutamate	metab_1634	yes	-	pos	-	283.126	3.5766	M+Na	C11H20N2O5	0	40.5	HMDB0028928	-	-	-	-	-	Organic acids and derivatives	Carboxylic acids and derivatives	Amino acids, peptides, and analogues	0	40.5	-	-	1.447	1.4287	0.0101	0.2507	5.2144	5.1682	5.4402	5.0251	5.0642	4.7498	4.6777	5.0246	4.9479	4.8908
pos_2557	N-Myristoyl Glutamine	metab_1721	yes	-	pos	-	401.239	3.74543	M+2Na-H	C19H36N2O4	0	35.2	LMFA08020219;HMDB0242050	-	-	-	-	-	Organic acids and derivatives	Carboxylic acids and derivatives	Amino acids, peptides, and analogues	0	35.2	-	-	1.9143	1.8391	0.008487	0.2326	3.9053	3.7148	4.5803	3.9848	4.0254	3.3488	3.4986	3.4621	3.6517	3.5841
pos_2712	Vignatic acid B	metab_1891	yes	-	pos	181485-20-1	502.287	4.12465	M+H-H2O	C27H41N3O7	0	76.2	HMDB0033617	-	-	-	-	-	Organic acids and derivatives	Carboxylic acids and derivatives	Amino acids, peptides, and analogues	0	76.2	-	-	1.5874	1.537	0.001167	0.1065	4.4778	4.5807	4.5051	4.3938	4.7032	4.7757	4.9997	4.8171	4.7993	4.9092
pos_2861	Trans-4-Aminocyclohexanecarboxylic acid	metab_2054	yes	-	pos	-	126.092	4.5438	M+H-H2O	C7H13NO2	0	39	HMDB0246355	-	-	-	-	-	Organic acids and derivatives	Carboxylic acids and derivatives	Amino acids, peptides, and analogues	0	39	-	-	1.7653	1.7119	0.0154	0.2767	6.2018	5.7006	5.5887	5.6315	6.1858	5.5532	5.1726	5.2556	5.5696	5.329
pos_2900	N-Acetylleucine	metab_2098	yes	C02710	pos	1188-21-2	174.112	4.66372	M+H	C8H15NO3	69	0	HMDB0011756	-	-	-	-	-	Organic acids and derivatives	Carboxylic acids and derivatives	Amino acids, peptides, and analogues	69	0	-	-	1.6615	1.5909	0.001944	0.1389	4.8514	5.1051	5.1745	5.0127	5.0138	4.5732	4.5734	4.5711	4.7796	4.8425
pos_3171	Oseltamivir	metab_2399	yes	C08092	pos	489-20-3;204255-11-8;196618-13-0	354.238	5.48247	M+ACN+H	C16H28N2O4	0	44.2	HMDB0014343;HMDB0035141	-	-	-	-	-	Organic acids and derivatives	Carboxylic acids and derivatives	Amino acids, peptides, and analogues	0	44.2	-	-	1.3388	1.2891	0.0444	0.3928	5.0159	5.0074	5.1789	5.0626	5.1536	4.9879	4.7411	4.3115	4.9636	4.8788
pos_3308	Propacetamol	metab_2548	yes	-	pos	-	546.329	5.8998	2M+NH4	C14H20N2O3	0	36.8	HMDB0256808	-	-	-	-	-	Organic acids and derivatives	Carboxylic acids and derivatives	Amino acids, peptides, and analogues	0	36.8	-	-	1.72	1.6969	0.03451	0.3644	3.3637	3.7856	2.7041	3.701	3.536	3.826	3.959	4.0341	4.0976	3.7541
pos_3423	Tyr-ile-gly-ser-arg	metab_2674	yes	-	pos	-	639.284	6.1152	M+2Na-H	C26H42N8O8	0	46.4	HMDB0259343	-	-	-	-	-	Organic acids and derivatives	Carboxylic acids and derivatives	Amino acids, peptides, and analogues	0	46.4	-	-	1.6345	1.5584	0.01792	0.2948	5.9326	5.6617	5.5794	5.8064	5.2001	5.2136	5.0925	5.1615	5.2795	5.4128
pos_36	Xemilofiban	metab_2864	yes	-	pos	-	381.152	5.796	M+NH4, M+Na, M+H-2H2O, M+H	C18H22N4O4	0	32.1	HMDB0259927	-	-	-	-	-	Organic acids and derivatives	Carboxylic acids and derivatives	Amino acids, peptides, and analogues	0	32.1	-	-	2.4752	2.382	0.01264	0.2617	5.8239	5.6388	5.3223	5.6615	6.1266	4.0905	5.4474	5.247	4.8252	4.5378
pos_4099	Vignatic acid A	metab_3413	yes	-	pos	181485-19-8	586.309	7.68803	M+CH3OH+H	C30H39N3O7	0	32.1	HMDB0033599	-	-	-	-	-	Organic acids and derivatives	Carboxylic acids and derivatives	Amino acids, peptides, and analogues	0	32.1	-	-	1.7569	1.6262	0.03468	0.3644	4.8416	4.8552	4.8831	4.8861	4.9901	5.6448	5.0066	5.6264	5.7564	4.8354
pos_4341	N-Stearoyl Valine	metab_3680	yes	-	pos	-	406.329	6.90172	M+Na	C23H45NO3	0	59.6	HMDB0241952;LMFA08020122	-	-	-	-	-	Organic acids and derivatives	Carboxylic acids and derivatives	Amino acids, peptides, and analogues	0	59.6	-	-	1.2477	1.1733	0.02701	0.3309	5.9938	5.9167	5.9821	6.0484	5.8098	5.6777	5.7084	5.4419	5.8565	5.876
pos_4801	N-Dodecylsarcosinate	metab_4187	yes	-	pos	-	290.269	6.24203	M+CH3OH+H	C15H31NO2	0	45.2	HMDB0255129	-	-	-	-	-	Organic acids and derivatives	Carboxylic acids and derivatives	Amino acids, peptides, and analogues	0	45.2	-	-	1.8101	1.7041	0.01331	0.2651	6.1394	5.5673	5.775	5.9194	5.5495	5.1482	5.1981	5.124	5.645	5.4548
pos_5389	Arginylphenylalaninamide	metab_4833	yes	-	pos	-	303.191	5.46647	M+H-H2O	C15H24N6O2	0	40.4	HMDB0257190	-	-	-	-	-	Organic acids and derivatives	Carboxylic acids and derivatives	Amino acids, peptides, and analogues	0	40.4	-	-	2.482	2.3842	0.000128	0.02233	3.7355	3.3793	3.9272	3.9446	3.7149	4.4966	4.4872	4.605	4.3581	4.5089
pos_5521	Domoic acid	metab_4978	yes	C13732	pos	14277-97-5	312.144	5.20977	M+H	C15H21NO6	0	56.8	HMDB0033939	-	-	-	-	-	Organic acids and derivatives	Carboxylic acids and derivatives	Amino acids, peptides, and analogues	0	56.8	-	-	1.2612	1.2503	0.02823	0.3374	5.1333	5.5039	5.2821	5.6159	5.3029	5.7375	5.7156	5.5446	5.47	5.7389
pos_5542	N-Arachidonoylglycine	metab_5001	yes	-	pos	179113-91-8	425.276	5.16177	M+ACN+Na	C22H35NO3	0	40	LMFA08020003;HMDB0005096	-	-	-	-	-	Organic acids and derivatives	Carboxylic acids and derivatives	Amino acids, peptides, and analogues	0	40	-	-	2.373	2.2988	1.625e-06	0.0009637	4.6072	4.5681	4.4186	4.4513	4.4867	5.1065	5.239	5.0368	5.1831	5.2319
pos_5684	N-Docosahexaenoyl Glutamine	metab_5156	yes	-	pos	-	439.291	4.87307	M+H-H2O	C27H40N2O4	0	34.4	HMDB0242012;LMFA08020129	-	-	-	-	-	Organic acids and derivatives	Carboxylic acids and derivatives	Amino acids, peptides, and analogues	0	34.4	-	-	1.2224	1.1883	0.03381	0.3632	5.3453	5.4517	5.1778	5.2033	5.5848	5.4904	5.8296	5.6467	5.5633	5.4966
pos_5689	Tyrosyl-Serine	metab_5161	yes	-	pos	-	251.102	4.85707	M+H-H2O	C12H16N2O5	0	58.8	HMDB0029114	-	-	-	-	-	Organic acids and derivatives	Carboxylic acids and derivatives	Amino acids, peptides, and analogues	0	58.8	-	-	2.5767	2.4999	0.02676	0.33	5.2003	4.7114	4.4138	3.9685	4.6181	3.0381	3.0181	2.9816	4.7914	3.6579
pos_5863	L-Pyroglutamyl-L-histidyl-3,3-dimethylprolinamide	metab_5354	yes	-	pos	-	355.186	4.49522	M+H-2H2O	C18H26N6O4	0	34.2	HMDB0257369	-	-	-	-	-	Organic acids and derivatives	Carboxylic acids and derivatives	Amino acids, peptides, and analogues	0	34.2	-	-	1.2993	1.2541	0.02039	0.3046	5.7057	5.4634	5.3789	5.5758	5.4428	5.4159	5.028	5.1517	5.3902	5.2416
pos_5986	3-Pyroglutamylthiazolidine-4-carboxylic acid	metab_5490	yes	-	pos	-	209.038	4.26998	M+H-2H2O	C9H12N2O4S	0	67.6	HMDB0256379	-	-	-	-	-	Organic acids and derivatives	Carboxylic acids and derivatives	Amino acids, peptides, and analogues	0	67.6	-	-	1.7821	1.7276	0.003287	0.171	4.1889	4.2923	4.2247	3.9647	4.0766	4.3141	4.8564	4.5605	4.5353	4.6682
pos_6097	N-Acetyl-D-tryptophan	metab_5614	yes	C03137	pos	2280-01-05	229.097	4.05197	M+H-H2O	C13H14N2O3	0	68.5	HMDB0255052	-	-	-	-	-	Organic acids and derivatives	Carboxylic acids and derivatives	Amino acids, peptides, and analogues	0	68.5	-	-	1.5542	1.5139	0.0008282	0.08469	5.5482	5.7244	5.6841	5.767	5.4826	5.9624	6.0593	5.9	5.9207	5.9407
pos_6112	3-Methylcrotonylglycine	metab_5632	yes	C20828	pos	33008-07-0	378.166	4.01997	2M+ACN+Na	C7H11NO3	0	34.1	HMDB0000459	-	-	-	-	-	Organic acids and derivatives	Carboxylic acids and derivatives	Amino acids, peptides, and analogues	0	34.1	-	-	2.7743	2.7407	0.0318	0.3533	3.2557	5.08	3.0413	2.8419	4.7287	2.873	1.5169	2.6538	2.6414	2.5042
pos_6597	N-Acetyltryptophan	metab_6167	yes	-	pos	1218-34-4	229.097	3.28907	M+H-H2O	C13H14N2O3	0	56.3	HMDB0255052;HMDB0013713	-	-	-	-	-	Organic acids and derivatives	Carboxylic acids and derivatives	Amino acids, peptides, and analogues	0	56.3	-	-	1.5684	1.5322	0.002167	0.1428	4.9994	4.7928	4.9258	5.1614	5.0168	5.3513	5.4911	5.2698	5.26	5.2268
pos_6653	Lysyl-Glycine	metab_6230	yes	-	pos	7563-03-03	429.246	3.20938	2M+Na	C8H17N3O3	0	46.3	HMDB0304784;HMDB0028951	-	-	-	-	-	Organic acids and derivatives	Carboxylic acids and derivatives	Amino acids, peptides, and analogues	0	46.3	-	-	1.8034	1.7501	0.004683	0.1881	6.1653	6.0577	6.227	6.0042	6.2338	5.3526	5.8798	5.8918	5.7878	5.5258
pos_6655	Isoleucyl-Tyrosine	metab_6231	yes	-	pos	-	295.165	3.20938	M+H	C15H22N2O4	0	55	HMDB0028919	-	-	-	-	-	Organic acids and derivatives	Carboxylic acids and derivatives	Amino acids, peptides, and analogues	0	55	-	-	1.5952	1.5537	0.0297	0.3427	5.2028	5.0893	5.4763	5.7217	5.7302	4.978	4.9179	5.3344	5.0837	4.8286
pos_6703	Epsilon-Maleimido-lysine	metab_6285	yes	-	pos	-	206.092	3.14508	M+H-2H2O	C10H15N3O4	0	49.8	HMDB0251891	-	-	-	-	-	Organic acids and derivatives	Carboxylic acids and derivatives	Amino acids, peptides, and analogues	0	49.8	-	-	1.919	1.9724	0.02437	0.3233	4.87	4.8574	4.9732	5.0116	5.2171	4.4616	4.7278	4.8686	3.725	4.1785
pos_6746	Penmacric acid	metab_6331	yes	-	pos	55297-13-7	167.045	3.08888	M+H-2H2O	C7H10N2O5	0	32.6	HMDB0029436	-	-	-	-	-	Organic acids and derivatives	Carboxylic acids and derivatives	Amino acids, peptides, and analogues	0	32.6	-	-	2.3053	2.276	0.04579	0.3955	5.2429	3.2972	3.3252	4.4249	3.4321	5.1029	4.9578	4.8051	4.4446	5.2621
pos_6870	Isoleucyl-Lysine	metab_6468	yes	-	pos	-	242.186	2.92167	M+H-H2O	C12H25N3O3	0	50.5	HMDB0028912	-	-	-	-	-	Organic acids and derivatives	Carboxylic acids and derivatives	Amino acids, peptides, and analogues	0	50.5	-	-	2.7214	2.5723	0.003531	0.1716	3.8125	4.3277	4.5634	3.8569	4.6237	5.0125	5.5081	5.7317	4.8642	4.9818
pos_7226	G-Nitro-l-arginine methyl ester	metab_6860	yes	-	pos	-	198.097	2.20715	M+H-2H2O	C7H15N5O4	0	32.6	HMDB0252563	-	-	-	-	-	Organic acids and derivatives	Carboxylic acids and derivatives	Amino acids, peptides, and analogues	0	32.6	-	-	2.1519	2.0115	0.04928	0.4051	5.4393	4.9348	4.2987	3.766	3.9698	5.2336	5.356	5.6387	5.1646	4.8844
pos_727	3-Amino-2-hydroxy-4-phenylbutanoic acid	metab_6907	yes	-	pos	-	196.097	4.89708	M+H, 2M+NH4	C10H13NO3	0	31	HMDB0256443	-	-	-	-	-	Organic acids and derivatives	Carboxylic acids and derivatives	Amino acids, peptides, and analogues	0	31	-	-	1.0403	0.9888	0.03383	0.3632	5.5087	5.4062	5.4494	5.5167	5.7721	5.3105	5.4291	5.3048	5.3879	5.3532
pos_7374	Asparaginylglutamic acid	metab_7023	yes	-	pos	20917-58-2	244.093	1.3264	M+H-H2O	C9H15N3O6	0	71.1	HMDB0028730	-	-	-	-	-	Organic acids and derivatives	Carboxylic acids and derivatives	Amino acids, peptides, and analogues	0	71.1	-	-	1.7383	1.6913	0.03316	0.3608	5.4902	5.8996	6.1244	5.6511	6.1886	4.9542	5.6363	5.46	5.6725	5.107
pos_744	4-[(2,4-Dihydroxy-3,3-dimethylbutanoyl)amino]butanoic acid	metab_7094	yes	-	pos	-	198.112	5.06575	M+H-2H2O, M+CH3OH+H	C10H19NO5	0	70.5	HMDB0246316	-	-	-	-	-	Organic acids and derivatives	Carboxylic acids and derivatives	Amino acids, peptides, and analogues	0	70.5	-	-	1.478	1.4252	0.004143	0.1847	6.2205	6.0358	5.8854	5.9289	5.941	5.793	5.5654	5.5983	5.7602	5.7737
pos_748	Valyl-Arginine	metab_7136	yes	-	pos	37682-75-0	312.144	5.09775	M+K, 2M+K	C11H23N5O3	0	51.1	HMDB0029121;HMDB0304792	-	-	-	-	-	Organic acids and derivatives	Carboxylic acids and derivatives	Amino acids, peptides, and analogues	0	51.1	-	-	1.1098	1.0967	0.03933	0.3761	5.0646	5.3443	5.239	5.5207	5.2494	5.5739	5.6026	5.4717	5.3192	5.5669
pos_3201	Quercetin 3-O-sophoroside	metab_7750	yes	C08549	pos	18609-17-1	326.134	5.587	M+NH4	C14H16N2O6	0	61.1	HMDB0304729	-	-	-	-	-	Organic acids and derivatives	Carboxylic acids and derivatives	Amino acids, peptides, and analogues	0	61.1	-	-	2.6398	2.517	0.008757	0.2361	4.8377	4.5018	5.0924	4.5028	5.032	3.2312	3.9605	3.2769	4.6337	3.9174
neg_1504	Glutamylphenylalanine	metab_8317	yes	-	neg	20556-22-3	293.114	3.43075	M-H	C14H18N2O5	0	80.5	HMDB0029156	-	-	-	-	-	Organic acids and derivatives	Carboxylic acids and derivatives	Amino acids, peptides, and analogues	0	80.5	-	-	1.5599	1.5036	0.019	0.215	5.8802	5.8506	5.9716	5.5664	6.2822	5.0966	5.2274	5.688	5.7367	5.2584
neg_1826	(2S)-3-Hydroxy-1-[(2S)-pyrrolidine-2-carbonyl]pyrrolidine-2-carboxylic acid	metab_8673	yes	-	neg	-	273.109	3.84	M+FA-H	C10H16N2O4	0	53.6	HMDB0257791	-	-	-	-	-	Organic acids and derivatives	Carboxylic acids and derivatives	Amino acids, peptides, and analogues	0	53.6	-	-	1.6849	1.632	0.04617	0.266	5.0098	5.2243	4.784	4.3823	4.1931	3.7385	3.7006	3.672	4.5303	4.5946
neg_1957	4-Hydroxystachydrine	metab_8818	yes	C08269	neg	515-25-3	158.081	4.01348	M-H	C7H13NO3	0	32.3	HMDB0029412;HMDB0029230	-	-	-	-	-	Organic acids and derivatives	Carboxylic acids and derivatives	Amino acids, peptides, and analogues	0	32.3	-	-	1.6576	1.5592	0.01018	0.1942	5.9792	6.1034	6.0823	6.2124	6.7644	5.6478	5.6441	5.5442	5.889	5.8461
neg_2105	Seryltryptophan	metab_8983	yes	-	neg	94421-70-2	290.115	4.20215	M-H	C14H17N3O4	0	63	HMDB0029050	-	-	-	-	-	Organic acids and derivatives	Carboxylic acids and derivatives	Amino acids, peptides, and analogues	0	63	-	-	1.3462	1.2882	0.03902	0.266	5.0967	5.339	5.177	4.7445	5.5482	4.7091	4.4737	4.957	5.0099	4.7242
neg_2376	H-D-Asp(OtBu)-OH	metab_9281	yes	-	neg	-	170.081	4.66703	M-H2O-H	C8H15NO4	0	54.4	HMDB0253009	-	-	-	-	-	Organic acids and derivatives	Carboxylic acids and derivatives	Amino acids, peptides, and analogues	0	54.4	-	-	1.6747	1.5484	0.04032	0.266	4.4191	4.3515	4.3335	4.5929	5.4159	4.0669	3.8999	3.6208	4.3934	4.1782
neg_2469	Glycyl-prolyl-glutamic acid	metab_9383	yes	-	neg	-	282.109	4.86442	M-H2O-H	C12H19N3O6	0	31.3	HMDB0252832	-	-	-	-	-	Organic acids and derivatives	Carboxylic acids and derivatives	Amino acids, peptides, and analogues	0	31.3	-	-	1.1317	1.1264	0.02032	0.2185	5.3915	5.2649	5.503	5.6126	5.3466	4.878	5.3044	5.2206	5.2412	5.0516
neg_2641	O-Tyrosine	metab_9575	yes	-	neg	2370-61-8	361.141	5.1618	2M-H	C9H11NO3	0	47.1	HMDB0006050	-	-	-	-	-	Organic acids and derivatives	Carboxylic acids and derivatives	Amino acids, peptides, and analogues	0	47.1	-	-	1.12	1.1036	0.02421	0.2256	6.2917	6.3241	6.2394	6.3596	5.953	5.9648	5.9627	5.7652	5.8868	6.1917
neg_2700	N-Lactoylleucine	metab_9641	yes	-	neg	210769-82-7	184.097	5.26573	M-H2O-H	C9H17NO4	0	32.1	HMDB0062176	-	-	-	-	-	Organic acids and derivatives	Carboxylic acids and derivatives	Amino acids, peptides, and analogues	0	32.1	-	-	1.3857	1.3298	0.002226	0.1302	5.8288	5.7762	5.6079	5.9457	5.6878	5.3463	5.3751	5.3904	5.6268	5.4092
neg_283	Golotimod	metab_9783	yes	-	neg	-	332.125	4.65618	M-H, M+Na-2H	C16H19N3O5	0	79.3	HMDB0252908	-	-	-	-	-	Organic acids and derivatives	Carboxylic acids and derivatives	Amino acids, peptides, and analogues	0	79.3	-	-	1.5016	1.5132	0.03967	0.266	5.4303	5.6893	5.8123	5.6122	4.5503	4.813	4.8635	4.7042	4.9097	4.9761
neg_34	Gamma-Glutamylphenylalanine	metab_10412	yes	-	neg	7432-24-8	293.114	4.26557	M-H2O-H, M-H, M+Na-2H	C14H18N2O5	0	41.9	HMDB0000594	-	-	-	-	-	Organic acids and derivatives	Carboxylic acids and derivatives	Amino acids, peptides, and analogues	0	41.9	-	-	1.4406	1.4225	0.003815	0.1624	6.5522	6.6047	6.774	6.529	6.3207	5.9942	6.0004	6.2339	6.3348	6.2153
neg_3453	Argatroban	metab_10472	yes	C04931	neg	74863-84-6	529.222	6.52328	M+Na-2H	C23H36N6O5S	0	38.9	HMDB0014423;PW_C008815	-	-	-	-	-	Organic acids and derivatives	Carboxylic acids and derivatives	Amino acids, peptides, and analogues	0	38.9	-	-	2.0879	2.0106	0.01346	0.1945	6.2535	6.1098	5.6551	6.1049	5.6898	4.5148	5.3871	4.4618	5.4294	5.6473
neg_4664	3-Amino-4-(3-hexylphenylamino)-4-oxobutylphosphonic acid	metab_11811	yes	-	neg	-	323.153	6.13358	M-H2O-H	C16H27N2O4P	0	38.7	HMDB0258163	-	-	-	-	-	Organic acids and derivatives	Carboxylic acids and derivatives	Amino acids, peptides, and analogues	0	38.7	-	-	1.778	1.786	0.01201	0.1942	5.4857	5.2817	5.3525	5.7942	5.2032	5.356	4.5153	4.4867	4.6107	4.9773
neg_5054	Tyr-Gly-Gly-Trp-Leu	metab_12244	yes	-	neg	-	615.257	5.73968	M+Na-2H	C30H38N6O7	0	75.7	HMDB0259342	-	-	-	-	-	Organic acids and derivatives	Carboxylic acids and derivatives	Amino acids, peptides, and analogues	0	75.7	-	-	2.1223	2.132	0.01772	0.2103	3.9696	4.2171	3.6999	2.6596	2.6416	2.214	2.5765	2.5481	2.4787	2.334
neg_5272	Tryptophyl-Phenylalanine	metab_12486	yes	-	neg	-	350.151	5.41138	M-H	C20H21N3O3	0	53.2	HMDB0029090	-	-	-	-	-	Organic acids and derivatives	Carboxylic acids and derivatives	Amino acids, peptides, and analogues	0	53.2	-	-	1.4954	1.5079	0.01199	0.1942	4.8401	5.2306	5.3633	5.0249	5.3042	4.8511	4.4404	5.0147	4.5257	4.5975
neg_5376	(+)-gamma-Hydroxy-L-homoarginine	metab_12600	yes	C08286	neg	1616-99-5	241.072	5.26573	M+K-2H	C7H16N4O3	0	34.8	HMDB0301838	-	-	-	-	-	Organic acids and derivatives	Carboxylic acids and derivatives	Amino acids, peptides, and analogues	0	34.8	-	-	1.7512	1.7304	0.001439	0.1177	5.1259	5.1647	5.0395	5.2499	4.5957	4.4517	4.5209	4.3872	4.4663	4.5418
neg_5455	Acetyl-DL-Leucine	metab_12688	yes	C02710	neg	1188-21-2	172.097	5.14658	M-H	C8H15NO3	75.9	0	HMDB0011756	-	-	-	-	-	Organic acids and derivatives	Carboxylic acids and derivatives	Amino acids, peptides, and analogues	75.9	0	-	-	1.901	1.8362	0.001034	0.113	5.7583	6.0918	6.1206	6.1178	5.8939	5.2234	5.2376	5.1571	5.597	5.6344
neg_5543	(3R)-3-Hydroxy-N-[(3S)-2-oxooxolan-3-yl]butanamide	metab_12786	yes	-	neg	-	208.061	5.00822	M+Na-2H	C8H13NO4	0	37.4	HMDB0243607	-	-	-	-	-	Organic acids and derivatives	Carboxylic acids and derivatives	Amino acids, peptides, and analogues	0	37.4	-	-	1.1968	1.1374	0.02445	0.227	5.3234	5.116	5.0547	5.2385	5.1147	4.8954	4.6139	4.7103	5.0116	5.1349
neg_5678	L-Canaline	metab_12934	yes	C08270	neg	496-93-5	401.204	4.79582	3M-H	C4H10N2O3	0	46.5	HMDB0012251	-	-	-	-	-	Organic acids and derivatives	Carboxylic acids and derivatives	Amino acids, peptides, and analogues	0	46.5	-	-	1.386	1.3608	0.03781	0.2639	4.1556	4.1267	4.1414	4.2917	3.7035	3.9589	3.5511	3.1388	3.6667	3.9016
neg_5776	Gamma-Glutamylfelinylglycine	metab_13043	yes	-	neg	-	392.147	4.63315	M-H	C15H27N3O7S	0	53.6	HMDB0252619	-	-	-	-	-	Organic acids and derivatives	Carboxylic acids and derivatives	Amino acids, peptides, and analogues	0	53.6	-	-	2.1578	2.0687	0.002769	0.1458	3.5676	4.2685	3.5083	4.2554	3.8907	3.2393	2.997	2.9685	3.3742	2.7539
neg_5799	Valyltryptophan	metab_13068	yes	-	neg	24587-37-9	302.151	4.60472	M-H	C16H21N3O3	0	42	HMDB0029138	-	-	-	-	-	Organic acids and derivatives	Carboxylic acids and derivatives	Amino acids, peptides, and analogues	0	42	-	-	1.1038	1.0527	0.04197	0.266	4.951	5.2751	5.1318	4.854	5.3325	4.7391	4.6564	4.9273	5.0395	4.8023
neg_6	Isoleucyl-Glutamate	metab_13290	yes	-	neg	-	259.13	4.13948	M-H, M+Na-2H, 2M-H, M-H2O-H	C11H20N2O5	0	31.5	HMDB0028906	-	-	-	-	-	Organic acids and derivatives	Carboxylic acids and derivatives	Amino acids, peptides, and analogues	0	31.5	-	-	1.1373	1.129	0.01586	0.2037	6.8861	6.9277	7.1108	6.8238	6.6804	6.4536	6.4859	6.6468	6.7772	6.6602
neg_6063	Tyrosine lactate	metab_13362	yes	-	neg	-	252.088	4.23352	M-H	C12H15NO5	0	59.2	HMDB0259352	-	-	-	-	-	Organic acids and derivatives	Carboxylic acids and derivatives	Amino acids, peptides, and analogues	0	59.2	-	-	1.7703	1.7654	0.03368	0.25	4.3744	5.4744	5.2835	5.092	4.6617	3.7081	4.0722	4.1896	4.8497	4.4898
neg_6258	Acetyl-Ser-Asp-Lys-Pro	metab_13575	yes	-	neg	-	486.221	4.01348	M-H	C20H33N5O9	0	82.5	HMDB0247929	-	-	-	-	-	Organic acids and derivatives	Carboxylic acids and derivatives	Amino acids, peptides, and analogues	0	82.5	-	-	1.1639	1.1727	0.03661	0.2608	3.6147	4.2465	4.0793	3.7979	3.7799	3.3507	3.7147	3.6861	3.6166	3.4964
neg_6284	Glutamylisoleucine	metab_13604	yes	-	neg	5879-22-1	281.112	3.98935	M+Na-2H	C11H20N2O5	0	75	HMDB0028822	-	-	-	-	-	Organic acids and derivatives	Carboxylic acids and derivatives	Amino acids, peptides, and analogues	0	75	-	-	1.6648	1.63	0.01276	0.1942	5.1505	5.1443	5.3617	5.2713	4.6165	4.5511	4.1128	4.4563	4.8416	4.7134
neg_6290	Gamma-Glu-leu	metab_13611	yes	-	neg	2566-39-4	259.13	3.98152	M-H	C11H20N2O5	80.2	0	HMDB0011171	-	-	-	-	-	Organic acids and derivatives	Carboxylic acids and derivatives	Amino acids, peptides, and analogues	80.2	0	-	-	1.4959	1.4692	0.003116	0.151	6.6236	6.6533	6.8641	6.7325	6.397	6.1272	6.0514	6.2347	6.4195	6.3265
neg_6334	5-hydroxy saxagliptin	metab_13660	yes	-	neg	-	376.188	3.9267	M+FA-H	C18H25N3O3	0	45.8	HMDB0061099	-	-	-	-	-	Organic acids and derivatives	Carboxylic acids and derivatives	Amino acids, peptides, and analogues	0	45.8	-	-	1.0298	1.0178	0.04225	0.266	5.3663	5.188	5.2046	5.7247	5.2402	5.6757	5.5831	5.5226	5.5304	5.6937
neg_6339	N-Acetyl-L-methionine	metab_13665	yes	C02712	neg	65-82-7	190.054	3.9267	M-H	C7H13NO3S	0	65.8	HMDB0011745	-	-	-	-	-	Organic acids and derivatives	Carboxylic acids and derivatives	Amino acids, peptides, and analogues	0	65.8	-	-	1.7622	1.742	0.01295	0.1942	6.1041	6.6062	6.6384	6.5661	5.872	5.3358	5.6414	5.5534	6.0055	6.0089
neg_6431	Ala-phe	metab_13768	yes	-	neg	3061-90-3	235.108	3.84	M-H	C12H16N2O3	89.5	0	HMDB0028694	-	-	-	-	-	Organic acids and derivatives	Carboxylic acids and derivatives	Amino acids, peptides, and analogues	89.5	0	-	-	1.1997	1.169	0.02361	0.2238	4.9478	5.3072	5.2762	4.9483	5.2573	4.6907	4.764	4.9472	5.0784	4.6902
neg_6465	N-(2,3-Dihydroxypropyl)valine	metab_13805	yes	-	neg	-	427.23	3.80083	2M+FA-H	C8H17NO4	0	52.2	HMDB0254994	-	-	-	-	-	Organic acids and derivatives	Carboxylic acids and derivatives	Amino acids, peptides, and analogues	0	52.2	-	-	1.8283	1.7901	0.0008128	0.1111	5.9827	5.6816	5.8838	6.0371	5.6617	4.949	5.3473	5.2819	5.4452	5.2716
neg_6841	Valylmethionine	metab_14221	yes	-	neg	14486-09-0	247.112	3.41445	M-H	C10H20N2O3S	0	51.5	HMDB0029133;HMDB0259742	-	-	-	-	-	Organic acids and derivatives	Carboxylic acids and derivatives	Amino acids, peptides, and analogues	0	51.5	-	-	1.1506	1.108	0.03665	0.2608	4.7939	5.204	5.1494	4.7837	5.274	4.5663	4.699	4.7625	4.9135	4.7727
neg_6945	Tezampanel	metab_14336	yes	-	neg	-	324.167	3.32765	M+FA-H	C13H21N5O2	0	36.3	HMDB0258944	-	-	-	-	-	Organic acids and derivatives	Carboxylic acids and derivatives	Amino acids, peptides, and analogues	0	36.3	-	-	1.4521	1.4097	0.01335	0.1945	4.7155	4.7633	4.5729	4.8708	4.7188	4.898	5.3856	5.4966	4.9586	4.9879
neg_6958	Aspartyl-Isoleucine	metab_14350	yes	-	neg	-	245.114	3.31982	M-H	C10H18N2O5	0	52.5	HMDB0028756	-	-	-	-	-	Organic acids and derivatives	Carboxylic acids and derivatives	Amino acids, peptides, and analogues	0	52.5	-	-	1.4875	1.4672	0.000479	0.08669	6.3795	6.4239	6.559	6.4182	6.2726	5.8667	5.9339	6.1298	6.1039	6.0715
neg_7068	Pentanoic acid, 5-(dipentylamino)-5-oxo-4-((3-quinolinylcarbonyl)amino)-, (R)-	metab_14473	yes	-	neg	-	478.216	3.22528	M+K-2H	C25H35N3O4	0	59.5	HMDB0247713	-	-	-	-	-	Organic acids and derivatives	Carboxylic acids and derivatives	Amino acids, peptides, and analogues	0	59.5	-	-	1.6026	1.534	0.04459	0.266	4.3352	3.5744	3.2143	3.3454	4.2278	2.8984	3.2622	3.2336	3.3699	3.019
neg_7310	Aceglutamide	metab_14740	yes	-	neg	2490-97-3	187.072	1.27523	M-H	C7H12N2O4	65.1	0	HMDB0006029;MJDBOTE0000339	-	-	-	-	-	Organic acids and derivatives	Carboxylic acids and derivatives	Amino acids, peptides, and analogues	65.1	0	-	-	2.031	1.9461	0.0132	0.1942	5.2175	5.6016	5.9475	5.3979	6.362	4.3878	5.0515	4.6335	5.1212	5.2254
neg_7386	N-Acetylhistidine	metab_14821	yes	C02997	neg	2497-02-01	196.072	0.961717	M-H	C8H11N3O3	51.1	0	HMDB0032055	-	-	-	-	-	Organic acids and derivatives	Carboxylic acids and derivatives	Amino acids, peptides, and analogues	51.1	0	-	-	2.2517	2.1839	0.002123	0.1294	4.4077	5.0962	5.228	4.729	5.4269	3.7396	4.1037	4.0751	4.0764	4.3254
neg_7406	Glycylhydroxyproline	metab_14844	yes	-	neg	24587-32-4	169.061	0.946067	M-H2O-H	C7H12N2O4	0	49.6	HMDB0011173	-	-	-	-	-	Organic acids and derivatives	Carboxylic acids and derivatives	Amino acids, peptides, and analogues	0	49.6	-	-	2.377	2.3249	0.004654	0.1716	4.5844	5.5389	4.6525	3.8744	4.9534	5.7685	5.8903	5.8519	5.5937	5.851
neg_7407	Oxiracetam	metab_14845	yes	-	neg	-	203.067	0.946067	M+FA-H	C6H10N2O3	0	46.4	HMDB0255986	-	-	-	-	-	Organic acids and derivatives	Carboxylic acids and derivatives	Amino acids, peptides, and analogues	0	46.4	-	-	1.4818	1.4345	0.0344	0.2525	5.2377	5.4449	5.3386	5.4022	5.9625	4.483	5.1258	5.3391	5.122	4.8432
neg_772	Threonylproline	metab_15108	yes	-	neg	46398-79-2	431.214	3.66632	M-H2O-H, 2M-H	C9H16N2O4	0	63.1	HMDB0029069	-	-	-	-	-	Organic acids and derivatives	Carboxylic acids and derivatives	Amino acids, peptides, and analogues	0	63.1	-	-	1.3886	1.3443	0.02907	0.2381	4.9529	5.3714	4.7654	4.9072	4.5939	4.6762	4.2777	4.2628	4.5684	4.685
neg_826	Gamma-Glutamylmethionine	metab_15168	yes	-	neg	17663-87-5	277.086	3.31982	M-H2O-H, M-H	C10H18N2O5S	86.3	0	HMDB0034367	-	-	-	-	-	Organic acids and derivatives	Carboxylic acids and derivatives	Amino acids, peptides, and analogues	86.3	0	-	-	1.6097	1.6016	0.007055	0.1889	6.1353	6.3069	6.836	6.504	6.1639	5.6002	5.8369	5.9514	5.9209	5.9939
neg_886	Asparaginyl-Proline	metab_15234	yes	-	neg	-	517.227	3.53313	2M-H, 2M+Hac-H	C9H15N3O4	0	63	HMDB0028739	-	-	-	-	-	Organic acids and derivatives	Carboxylic acids and derivatives	Amino acids, peptides, and analogues	0	63	-	-	1.7203	1.6549	0.02649	0.2355	4.1169	4.2895	3.9824	5.1304	4.446	3.4629	3.8269	3.7984	4.1457	3.5836
neg_896	Glycyl-leucine	metab_15245	yes	C02155	neg	869-19-2	187.108	3.58013	M-H, 2M-H	C8H16N2O3	92.6	0	HMDB0000759;MJDBOTE0000578	-	-	-	-	-	Organic acids and derivatives	Carboxylic acids and derivatives	Amino acids, peptides, and analogues	92.6	0	-	-	1.2454	1.2104	0.02939	0.2387	6.4684	6.8829	6.7866	6.4232	6.7789	6.1188	6.1487	6.4634	6.5936	6.2946
pos_4715	Sphinganine	metab_4091	yes	C00836	pos	764-22-7	302.305	6.32127	M+H	C18H39NO2	75.5	0	LMSP01020001;HMDB0000269;PW_C000184;HMDB0242634	-	-	map00600;map01100;map04071	Metabolism;Metabolism;Environmental Information Processing	Lipid metabolism;Global and overview maps;Signal transduction	Organic nitrogen compounds	Organonitrogen compounds	Amines	75.5	0	Sphingolipid metabolism;Metabolic pathways;Sphingolipid signaling pathway	Sphingolipid metabolism;Metabolic pathways;Sphingolipid signaling pathway	1.454	1.3635	0.01612	0.2837	7.0626	6.6999	6.8231	6.8867	6.5976	6.4392	6.5199	6.2974	6.6154	6.6497
neg_6860	Porphobilinogen	metab_14242	yes	C00931	neg	487-90-1	225.088	3.3988	M-H	C10H14N2O4	0	68.7	PW_C000166;HMDB0000245	-	-	map01100;map01110;map00860;map01120;map01240	Metabolism;Metabolism;Metabolism;Metabolism;Metabolism	Global and overview maps;Global and overview maps;Metabolism of cofactors and vitamins;Global and overview maps;Global and overview maps	Organic nitrogen compounds	Organonitrogen compounds	Amines	0	68.7	Metabolic pathways;Biosynthesis of secondary metabolites;Porphyrin and chlorophyll metabolism;Microbial metabolism in diverse environments;Biosynthesis of cofactors	Metabolic pathways;Biosynthesis of secondary metabolites;Porphyrin and chlorophyll metabolism;Microbial metabolism in diverse environments;Biosynthesis of cofactors	1.0526	1.0146	0.02808	0.2355	5.5782	5.2734	5.4369	5.2691	5.631	5.0118	5.1784	5.2423	5.2856	5.2665
pos_6840	Ritalinic Acid	metab_6436	yes	-	pos	19395-41-6	237.16	2.96135	M+NH4	C13H17NO2	91.9	0	HMDB0042008	-	-	-	-	-	Organic nitrogen compounds	Organonitrogen compounds	Amines	91.9	0	-	-	2.7098	2.5218	0.01358	0.2651	4.4443	4.2833	4.2423	3.8929	3.8627	5.1312	4.7263	6.3385	5.1371	4.5825
neg_2843	(4-((5,6-Diphenylpyrazin-2-yl)(isopropyl)amino)butoxy)acetic acid	metab_9798	yes	-	neg	-	440.196	5.4947	M+Na-2H	C25H29N3O3	0	37.8	HMDB0254922	-	-	-	-	-	Organic nitrogen compounds	Organonitrogen compounds	Amines	0	37.8	-	-	2.2765	2.2703	0.02254	0.2224	3.7015	3.5308	3.0912	4.2024	4.6306	4.3529	5.6657	5.6784	4.8399	4.3058
neg_3440	Alpha-Linolenoyl ethanolamide	metab_10458	yes	C13828	neg	-	366.265	6.51547	M+FA-H	C20H35NO2	0	55.3	HMDB0013624	-	-	-	-	-	Organic nitrogen compounds	Organonitrogen compounds	Amines	0	55.3	-	-	1.0958	1.0493	0.04456	0.266	4.275	4.0086	4.012	4.1431	4.5082	3.6958	4.0599	4.0313	3.9618	3.8165
neg_4353	(4E,14Z)-2-Aminooctadeca-4,14-diene-1,3-diol	metab_11467	yes	-	neg	-	342.265	6.55457	M+FA-H	C18H35NO2	0	34.9	HMDB0242112	-	-	-	-	-	Organic nitrogen compounds	Organonitrogen compounds	Amines	0	34.9	-	-	1.1498	1.1211	0.0273	0.2355	6.4921	6.4503	6.2399	6.3052	5.995	5.9149	5.9073	5.8807	6.0934	6.2114
pos_6813	Shikimic acid	metab_6406	yes	C00493	pos	138-59-0	216.087	3.00133	M+ACN+H	C7H10O5	0	43.8	HMDB0003070	-	-	map01100;map01110;map01240;map01063;map01230;map00400;map01070;map01061;map01060	Metabolism;Metabolism;Metabolism;Metabolism;Metabolism;Metabolism;Metabolism;Metabolism;Metabolism	Global and overview maps;Global and overview maps;Global and overview maps;Chemical structure transformation maps;Global and overview maps;Amino acid metabolism;Chemical structure transformation maps;Chemical structure transformation maps;Chemical structure transformation maps	Organic oxygen compounds	Organooxygen compounds	Alcohols and polyols	0	43.8	Metabolic pathways;Biosynthesis of secondary metabolites;Biosynthesis of cofactors;Biosynthesis of alkaloids derived from shikimate pathway;Biosynthesis of amino acids;Phenylalanine, tyrosine and tryptophan biosynthesis;Biosynthesis of plant hormones;Biosynthesis of phenylpropanoids;Biosynthesis of plant secondary metabolites	Metabolic pathways;Biosynthesis of secondary metabolites;Biosynthesis of cofactors;Biosynthesis of alkaloids derived from shikimate pathway;Biosynthesis of amino acids;Phenylalanine, tyrosine and tryptophan biosynthesis;Biosynthesis of plant hormones;Biosynthesis of phenylpropanoids;Biosynthesis of plant secondary metabolites	1.2675	1.1838	0.01167	0.2594	5.1823	4.982	4.903	5.085	5.2144	4.7716	4.8921	4.7452	4.901	4.9267
pos_3139	[3-(2-Aminopropyl)-6-methylidenecyclohexa-1,3-dien-1-yl]methanediol	metab_2363	yes	-	pos	-	196.133	5.40247	M+H	C11H17NO2	0	30.4	HMDB0257571	-	-	-	-	-	Organic oxygen compounds	Organooxygen compounds	Alcohols and polyols	0	30.4	-	-	1.4318	1.3877	0.0119	0.2594	5.3884	5.3932	5.0095	5.1205	4.9718	4.907	4.7591	4.8683	4.941	4.8564
pos_4760	Rishitin	metab_4141	yes	C09715	pos	18178-54-6	240.196	6.28167	M+NH4	C14H22O2	0	57.6	HMDB0035593;HMDB0302980	-	-	-	-	-	Organic oxygen compounds	Organooxygen compounds	Alcohols and polyols	0	57.6	-	-	1.3189	1.2502	0.03937	0.3761	5.1208	5.1608	5.3674	5.3889	5.1441	4.7808	4.8955	4.7334	5.1936	5.1804
pos_750	4-(2-Aminoethyl)cyclohexa-3,5-diene-1,2-diol	metab_7159	yes	-	pos	-	352.223	5.15375	M+H-H2O, 2M+ACN+H	C8H13NO2	0	34.7	HMDB0257596	-	-	-	-	-	Organic oxygen compounds	Organooxygen compounds	Alcohols and polyols	0	34.7	-	-	1.0099	0.9568	0.009084	0.2405	5.6904	5.5918	5.6286	5.6164	5.654	5.5658	5.5122	5.342	5.4974	5.5372
neg_5475	Xi-3-Methyl-3-cyclohexen-1-ol	metab_12710	yes	-	neg	-	157.086	5.11715	M+FA-H	C7H12O	0	36.7	HMDB0034372	-	-	-	-	-	Organic oxygen compounds	Organooxygen compounds	Alcohols and polyols	0	36.7	-	-	1.1306	1.1258	0.01853	0.2136	4.962	5.0541	4.8472	5.0422	4.875	4.4136	4.8817	4.8275	4.6876	4.5613
neg_5589	3h-Adrenaline	metab_12836	yes	-	neg	-	230.103	4.94343	M+FA-H	C9H15NO3	0	59.6	HMDB0246263	-	-	-	-	-	Organic oxygen compounds	Organooxygen compounds	Alcohols and polyols	0	59.6	-	-	1.6728	1.6296	0.005678	0.1756	4.7791	4.837	4.6965	4.9915	4.6151	3.8462	4.3009	4.1267	4.5799	4.4185
pos_713	Etilefrine	metab_6757	yes	-	pos	-	214.144	4.74435	M+Na, M+CH3OH+H	C10H15NO2	0	38.2	HMDB0252100	-	-	-	-	-	Benzenoids	Phenols	1-hydroxy-4-unsubstituted benzenoids	0	38.2	-	-	1.7593	1.6677	0.04321	0.3871	5.8435	6.0673	6.0098	5.7583	5.0714	4.8625	5.2715	5.0339	5.436	5.5345
neg_6901	PBD dimer	metab_14288	yes	-	neg	-	770.284	3.35175	M+FA-H	C42H39N5O7	0	76	HMDB0256148	-	-	-	-	-	Organoheterocyclic compounds	Benzodiazepines	1,4-benzodiazepines	0	76	-	-	2.0544	2.0336	0.004179	0.1669	6.1749	5.934	5.9532	5.9804	6.3164	5.8125	5.5512	4.9071	5.3203	4.8738
pos_3419	5,6,7,8-tetrahydro-2-Naphthoic Acid	metab_2669	yes	C14111	pos	1131-63-1	177.091	6.1152	M+H	C11H12O2	37.2	0	-	-	-	map00626;map01120	Metabolism;Metabolism	Xenobiotics biodegradation and metabolism;Global and overview maps	-	-	-	37.2	0	Naphthalene degradation;Microbial metabolism in diverse environments	Naphthalene degradation;Microbial metabolism in diverse environments	1.5924	1.4916	0.003587	0.1716	4.8814	4.8459	4.766	5.025	4.6683	4.3543	4.4448	4.4694	4.6691	4.591
neg_5326	N-Acetyl-D-phenylalanine	metab_12545	yes	C05620	neg	10172-89-1	206.082	5.32905	M-H	C11H13NO3	77.6	0	-	-	-	map01100;map00360	Metabolism;Metabolism	Global and overview maps;Amino acid metabolism	-	-	-	77.6	0	Metabolic pathways;Phenylalanine metabolism	Metabolic pathways;Phenylalanine metabolism	1.9746	1.9254	0.00103	0.113	5.3025	5.6276	5.7442	5.6995	5.1997	4.7815	4.7448	4.6097	5.0961	4.8963
neg_3896	Acacetin	metab_10959	yes	C01470	neg	480-44-4	283.061	7.68037	M-H	C16H12O5	91.2	0	LMPK12110468;MJDBOTE0000499	-	-	map00944	Metabolism	Biosynthesis of other secondary metabolites	-	-	-	91.2	0	Flavone and flavonol biosynthesis	Flavone and flavonol biosynthesis	1.1328	1.1132	0.001455	0.1177	6.2036	6.1966	6.2279	6.3667	6.1142	5.8904	6.0549	5.9863	6.0172	5.9924
pos_1193	Lithocholenic Acid	metab_215	yes	-	pos	-	357.279	6.33718	M+H-H2O, M+Na	C24H38O3	49.8	0	-	-	-	-	-	-	-	-	-	49.8	0	-	-	2.0612	1.925	0.004128	0.1847	6.7597	6.7295	6.9431	6.1637	6.6179	7.3059	7.0317	7.1669	7.2262	7.2308
pos_1252	Lauryldiethanolamine	metab_281	yes	-	pos	-	274.274	6.21863	M+H-H2O, M+H	C16H35NO2	58.8	0	-	-	-	-	-	-	-	-	-	58.8	0	-	-	1.3297	1.2442	0.01834	0.2948	8.264	7.895	8.0526	8.1304	7.8687	7.716	7.8033	7.6271	7.874	7.884
pos_1502	Trp Asp	metab_559	yes	-	pos	-	320.124	3.0331	M+H, M+NH4	C15H17N3O5	91	0	-	-	-	-	-	-	-	-	-	91	0	-	-	3.1222	3.0679	0.0307	0.3492	3.9524	4.1282	4.004	2.1398	4.6065	3.095	1.0091	0.9764	2.0314	3.256
pos_1595	Lys His	metab_661	yes	-	pos	-	284.172	0.875	M+H-H2O, M+H	C12H21N5O3	33.2	0	-	-	-	-	-	-	-	-	-	33.2	0	-	-	1.8248	1.6998	0.04538	0.3938	5.3374	5.3756	5.3553	5.0115	5.3539	4.3119	5.1936	4.3743	4.4563	5.3531
pos_1796	Gln Lys	metab_883	yes	-	pos	-	275.171	0.898817	M+H	C11H22N4O4	58.2	0	-	-	-	-	-	-	-	-	-	58.2	0	-	-	3.505	3.4465	0.03393	0.3632	3.6206	4.9333	4.8225	4.249	6.0515	0.9624	3.7604	4.1914	3.4435	1.0147
pos_2125	Pro Ile Gln	metab_1246	yes	-	pos	-	357.213	2.8037	M+H	C16H28N4O5	45.4	0	-	-	-	-	-	-	-	-	-	45.4	0	-	-	1.5808	1.531	0.003104	0.1659	4.9539	5.039	4.8727	4.7421	4.7171	5.2748	5.2904	5.0036	5.1888	5.2528
pos_2237	Ala Thr Val Glu	metab_1368	yes	-	pos	-	419.213	3.0331	M+H	C17H30N4O8	36.8	0	-	-	-	-	-	-	-	-	-	36.8	0	-	-	2.0004	1.9704	0.01778	0.2945	4.2108	4.5437	4.1681	3.5211	4.7194	3.4122	3.6416	3.6051	3.8085	3.4705
pos_2276	Ile Leu Gln	metab_1410	yes	-	pos	-	373.244	3.1052	M+H	C17H32N4O5	51.2	0	-	-	-	-	-	-	-	-	-	51.2	0	-	-	2.1639	2.0596	0.0322	0.3563	3.2549	3.4241	3.9426	3.2993	4.4602	4.2767	4.7721	4.9072	3.916	4.3015
pos_2395	Ile Ile Ala	metab_1541	yes	-	pos	-	316.223	3.3762	M+H	C15H29N3O4	72.7	0	-	-	-	-	-	-	-	-	-	72.7	0	-	-	1.9892	1.8912	0.01143	0.2594	4.6764	3.9992	4.8026	4.1702	4.1341	4.9196	5.1711	5.0023	4.7779	4.787
pos_2803	Val Pro Phe	metab_1992	yes	-	pos	-	362.207	4.38257	M+H	C19H27N3O4	55.3	0	-	-	-	-	-	-	-	-	-	55.3	0	-	-	1.1083	1.073	0.02833	0.3374	6.5765	6.4943	6.3708	6.5437	6.7459	6.7858	6.8671	6.8051	6.6683	6.6206
pos_3197	Ile Leu Ile	metab_2427	yes	-	pos	-	358.269	5.56308	M+H	C18H35N3O4	72	0	-	-	-	-	-	-	-	-	-	72	0	-	-	1.2804	1.3188	0.04538	0.3938	4.6756	4.9264	4.6326	4.4361	4.9108	4.3419	4.3612	4.7708	4.2861	4.282
pos_3474	N,N-Dimethyldodecylamine-N-oxide	metab_2729	yes	-	pos	-	230.248	6.23418	M+H	C14H31NO	55.6	0	-	-	-	-	-	-	-	-	-	55.6	0	-	-	1.5616	1.4599	0.01442	0.2708	6.5234	6.1075	6.3294	6.4539	6.1331	5.8627	5.933	5.7389	6.1566	6.0976
pos_3870	Lyso-PAF C-16	metab_3160	yes	-	pos	-	482.36	7.73553	M+H	C24H52NO6P	31.5	0	-	-	-	-	-	-	-	-	-	31.5	0	-	-	2.1192	1.9759	0.01841	0.2948	5.7828	5.7014	5.4255	5.3665	6.197	6.6795	5.7737	6.526	6.5686	6.1962
pos_5325	Leu Leu Phe	metab_4763	yes	-	pos	-	392.254	5.61958	M+H	C21H33N3O4	87.4	0	-	-	-	-	-	-	-	-	-	87.4	0	-	-	2.6612	2.4926	0.02106	0.3099	2.6569	2.6704	3.2922	2.7012	3.1179	4.4047	4.239	4.5754	3.8574	2.6507
pos_5476	Val Leu Phe	metab_4928	yes	-	pos	-	378.238	5.29777	M+H	C20H31N3O4	58.6	0	-	-	-	-	-	-	-	-	-	58.6	0	-	-	2.6865	2.5278	0.04145	0.3868	2.573	4.2965	3.6305	2.6173	4.6932	4.6762	5.1751	5.3693	4.2874	4.2198
pos_6014	Val Pro Ile	metab_5523	yes	-	pos	-	328.223	4.21332	M+H	C16H29N3O4	46.2	0	-	-	-	-	-	-	-	-	-	46.2	0	-	-	1.3877	1.3415	0.01184	0.2594	5.7121	5.6893	5.6323	5.8029	5.9105	6.0606	6.229	6.1578	5.9319	5.8156
pos_6245	Leu Ala Thr Lys	metab_5779	yes	-	pos	-	432.28	3.81797	M+H	C19H37N5O6	37.8	0	-	-	-	-	-	-	-	-	-	37.8	0	-	-	1.0632	1.0323	0.004526	0.1871	5.7222	5.6176	5.6473	5.6807	5.6339	5.8484	5.882	5.8056	5.6854	5.8814
pos_6793	Val Leu Thr	metab_6383	yes	-	pos	-	332.218	3.02515	M+H	C15H29N3O5	58.2	0	-	-	-	-	-	-	-	-	-	58.2	0	-	-	1.961	1.8604	0.02146	0.3135	4.5073	5.374	5.2236	4.6161	5.2549	5.2803	5.6472	5.8898	5.5565	5.5215
pos_6839	Trp Gln	metab_6434	yes	-	pos	-	333.156	2.96135	M+H	C16H20N4O4	76.5	0	-	-	-	-	-	-	-	-	-	76.5	0	-	-	3.6228	3.5109	0.001972	0.1393	4.1028	4.2466	4.4898	3.424	3.9334	2.1877	1.8948	1.8588	3.6334	1.7263
pos_6924	Ala Ile Ala	metab_6528	yes	-	pos	-	274.176	2.85785	M+H	C12H23N3O4	48.3	0	-	-	-	-	-	-	-	-	-	48.3	0	-	-	1.5635	1.565	0.0288	0.3385	4.155	4.4342	4.8332	4.5011	4.7096	4.6883	4.8253	4.8792	5.2454	4.9889
pos_6953	Val Ile Ser	metab_6560	yes	-	pos	-	318.202	2.81167	M+H	C14H27N3O5	40.1	0	-	-	-	-	-	-	-	-	-	40.1	0	-	-	1.6642	1.6064	0.03093	0.3496	4.6566	5.2455	5.2235	4.9668	5.1606	5.1437	5.7628	5.7836	5.215	5.6552
pos_7009	Gly His Leu	metab_6623	yes	-	pos	-	326.182	2.78778	M+H	C14H23N5O4	73.4	0	-	-	-	-	-	-	-	-	-	73.4	0	-	-	1.6732	1.5916	0.01424	0.2707	5.3452	5.582	5.4078	5.259	5.5461	5.5908	6.0386	6.1995	5.7542	5.6332
pos_7375	Nalpha-Acetyl-L-arginine	metab_7024	yes	-	pos	-	217.129	1.3264	M+H	C8H16N4O3	70.3	0	-	-	-	-	-	-	-	-	-	70.3	0	-	-	2.3952	2.2497	0.01081	0.2594	5.9101	5.886	6.6449	6.1175	6.0335	4.6825	5.6588	4.9618	5.5822	5.6489
pos_7466	Asn Thr	metab_7122	yes	-	pos	-	234.108	0.945833	M+H	C8H15N3O5	75.2	0	-	-	-	-	-	-	-	-	-	75.2	0	-	-	3.05	3.0269	0.04803	0.4023	3.6501	5.4062	4.5868	3.6785	5.4533	1.7301	1.9562	4.036	4.6458	1.7874
pos_755	(S)-(4-Hydroxy-phenyl)-(S)-piperidin-2-yl-acetic acid methyl ester hydrochloride	metab_7214	yes	-	pos	-	250.144	5.22577	M+H, M+NH4	C14H19NO3	0	37.8	-	-	-	-	-	-	-	-	-	0	37.8	-	-	2.5514	2.3529	0.04033	0.3808	4.5654	4.381	3.24	2.7874	4.1327	4.9148	4.0929	5.6052	4.6399	5.0353
pos_7757	MJDBISSP00000002	metab_7444	yes	-	pos	-	403.361	6.42477	M+H	C23H42D3NO4	87	0	MJDBISSP00000002	-	-	-	-	-	-	-	-	87	0	-	-	1.0243	0.9654	0.03382	0.3632	7.7529	7.7775	7.8371	7.8904	7.7498	7.545	7.6011	7.4997	7.7343	7.8083
neg_1982	DIPROTIN B	metab_8846	yes	-	neg	-	326.208	4.04483	M-H	C16H29N3O4	45.7	0	-	-	-	-	-	-	-	-	-	45.7	0	-	-	1.4915	1.4699	0.002675	0.1445	5.0158	4.9905	4.8917	5.405	4.9619	5.4936	5.4524	5.4575	5.3599	5.5659
neg_2517	N-Acetyl-DL-Leucine	metab_9437	yes	-	neg	-	172.097	4.95127	M-H	C8H15NO3	63.7	0	MJDBOTE0001584	-	-	-	-	-	-	-	-	63.7	0	-	-	1.9057	1.8335	0.0006073	0.0988	5.3525	5.6811	5.7221	5.7444	5.6129	4.9754	4.8491	4.8039	5.2442	5.1752
neg_2873	Ubenimex	metab_9831	yes	C00732	neg	58970-76-6	307.166	5.54952	M-H	C16H24N2O4	47.4	0	-	-	-	-	-	-	-	-	-	47.4	0	-	-	1.4965	1.4433	0.03407	0.2517	5.2435	5.2943	5.3426	5.5008	5.1266	5.2365	4.5927	4.22	4.9702	5.0448
neg_4531	Supiculisporic Acid	metab_11665	yes	-	neg	-	327.181	6.3203	M-H	C17H28O6	91.8	0	-	-	-	-	-	-	-	-	-	91.8	0	-	-	1.978	1.9372	0.005223	0.1749	6.83	6.8115	6.5061	7.2455	6.2817	5.5586	6.0818	6.0201	6.2273	6.0196
neg_6148	3-Aminopentanedioic Acid	metab_13456	yes	C05574	neg	-	128.034	4.13948	M-H2O-H	C5H9NO4	34.3	0	-	-	-	-	-	-	-	-	-	34.3	0	-	-	1.0835	1.0637	0.0119	0.1942	5.5012	5.5182	5.6331	5.653	5.3115	5.2063	5.2147	5.2063	5.3869	5.3882
neg_619	2-(8-hydroxyoctyl)-6-Methoxybenzoic Acid	metab_13502	yes	-	neg	-	279.16	6.04047	M-H, M+FA-H	C16H24O4	57.9	0	-	-	-	-	-	-	-	-	-	57.9	0	-	-	1.5778	1.5467	0.02759	0.2355	5.7556	5.5943	5.6291	6.1783	5.156	4.9798	5.4555	4.6808	5.1452	5.2405
neg_6627	Asp Leu Ala Glu	metab_13984	yes	-	neg	-	445.194	3.6193	M-H	C18H30N4O9	43	0	-	-	-	-	-	-	-	-	-	43	0	-	-	1.0934	1.0815	0.04776	0.266	3.7098	4.1639	3.5522	3.6833	3.6653	3.2361	3.6065	3.5715	3.502	3.3967
neg_7634	MJDBISSN00000003	metab_15096	yes	-	neg	-	411.305	6.28143	M-H	C24H36D4O5	56.3	0	MJDBISSN00000003	-	-	-	-	-	-	-	-	56.3	0	-	-	1.4915	1.4502	0.01134	0.1942	7.0464	6.9571	7.202	7.4483	6.9193	6.4223	6.6903	6.4687	6.8539	6.8987
