# Supplementary material for: The microbiome- and metabolome-modulating activity of dietary cholesterol: insights from the small and large intestines
Source: Royal Society of Chemistry journal article supplement (doi:10.1039/d4fo03049d), 2025-01-01
Supplement: d4fo03049d7.xlsx [file d4fo03049d7.xlsx]

## Sheet: Sheet1
Table S7. Metabolites Significantly Altered in iSI_0 and iSI_02 Groups Based on Metabolomics
ID	Metabolite	Metab ID	Significant	KEGG Compound ID	Mode	CAS ID	M/Z	Retention time	Adducts	Formula	Fragmentation Score	Theoretical Fragmentation Score	Library ID	KEGG Compound First Category	KEGG Compound Second Category	KEGG Pathway ID	KEGG Pathway First Category	KEGG Pathway Second Category	HMDB Superclass	HMDB Class	HMDB Subclass	Fragmentation Score	Theoretical Fragmentation Score	KEGG Pathway Description	KEGG Pathway Description	VIP_pred_OPLS-DA	VIP_PLS-DA	P_value	FDR	iSI_0_1	iSI_0_2	iSI_0_3	iSI_0_4	iSI_0_5	iSI_02_1	iSI_02_2	iSI_02_3	iSI_02_4	iSI_02_5
pos_4255	Calcidiol	metab_3585	yes	C01561	pos	19356-17-3	401.341	7.17188	M+H	C27H44O2	0	84.2	HMDB0003550	-	-	map01100;map04928;map05152;map01110;map00100	Metabolism;Organismal Systems;Human Diseases;Metabolism;Metabolism	Global and overview maps;Endocrine system;Infectious disease: bacterial;Global and overview maps;Lipid metabolism	Lipids and lipid-like molecules	Steroids and steroid derivatives	Vitamin D and derivatives	0	84.2	Metabolic pathways;Parathyroid hormone synthesis, secretion and action;Tuberculosis;Biosynthesis of secondary metabolites;Steroid biosynthesis	Metabolic pathways;Parathyroid hormone synthesis, secretion and action;Tuberculosis;Biosynthesis of secondary metabolites;Steroid biosynthesis	1.3482	1.3357	3.499e-08	2.992e-06	4.5568	4.5529	4.5621	4.5817	4.5789	4.9459	5.0441	5.0472	5.0159	5.0723
pos_4494	Ercalcitriol	metab_3849	yes	-	pos	60133-18-8	461.362	6.63155	M+CH3OH+H	C28H44O3	0	55.8	HMDB0006225	-	-	-	-	-	Lipids and lipid-like molecules	Steroids and steroid derivatives	Vitamin D and derivatives	0	55.8	-	-	1.3941	1.4048	0.000531	0.001479	4.2675	4.2636	4.4659	4.5221	4.5754	5.1343	4.9487	4.7597	5.148	4.8704
pos_4552	14-Epi-19-nortachysterol	metab_3914	yes	C07711	pos	1173-13-3;17592-07-3	383.33	6.55202	M+H	C27H42O	0	41.1	HMDB0006560;HMDB0244581;HMDB0006500	-	-	-	-	-	Lipids and lipid-like molecules	Steroids and steroid derivatives	Vitamin D and derivatives	0	41.1	-	-	1.3176	1.3088	6.729e-06	4.779e-05	5.3818	5.5007	5.375	5.5036	5.3473	5.9353	5.8271	5.8488	5.9425	5.8063
pos_4709	Paricalcitol	metab_4084	yes	C08127	pos	131918-61-1	439.32	6.32922	M+Na	C27H44O3	0	59.2	HMDB0015046;LMST04030163	-	-	-	-	-	Lipids and lipid-like molecules	Steroids and steroid derivatives	Vitamin D and derivatives	0	59.2	-	-	1.2366	1.2082	0.008483	0.01545	4.9376	5.2061	4.8562	5.1965	5.2368	4.7086	4.805	4.4275	4.8369	4.253
pos_929	24,24-Dfhv	metab_7616	yes	-	pos	-	454.353	6.56792	M+NH4, M+Na	C27H42F2O2	0	68.4	HMDB0245663	-	-	-	-	-	Lipids and lipid-like molecules	Steroids and steroid derivatives	Vitamin D and derivatives	0	68.4	-	-	1.3436	1.3253	0.0001566	0.0005551	6.0802	6.0874	6.0087	6.0952	6.1275	5.7618	5.5768	5.3775	5.7286	5.5231
neg_5668	Chymostatin	metab_12923	yes	C11308	neg	9076-44-2	588.289	4.81148	M-H2O-H	C31H41N7O6	0	72.6	HMDB0242696	-	-	-	-	-	Lipids and lipid-like molecules	Steroids and steroid derivatives	Vitamin D and derivatives	0	72.6	-	-	1.5248	1.5165	1.132e-05	3.752e-05	6.0213	5.8909	5.9388	5.7751	5.848	5.0225	5.0391	5.0208	5.3871	5.0541
neg_5906	1,25-Dihydroxyvitamin D3 monoglucuronide	metab_13188	yes	-	neg	-	637.357	4.45068	M+FA-H	C33H52O9	0	52.7	HMDB0244154	-	-	-	-	-	Lipids and lipid-like molecules	Steroids and steroid derivatives	Vitamin D and derivatives	0	52.7	-	-	1.418	1.4196	0.0001391	0.0002908	6.4434	6.0578	6.3156	6.0139	6.1446	5.3622	5.4867	5.391	5.7372	5.4256
pos_6159	5-Methoxytryptophan	metab_5683	yes	-	pos	2504-22-5	267.134	3.97132	M+CH3OH+H	C12H14N2O3	0	46.5	HMDB0002339	-	-	-	-	-	Organoheterocyclic compounds	Indoles and derivatives	Tryptamines and derivatives	0	46.5	-	-	1.0881	1.0787	1.124e-05	7.138e-05	5.0903	5.0296	5.0595	4.9968	5.0328	4.7322	4.6759	4.6865	4.8338	4.7379
neg_6702	Tropolone A	metab_14068	yes	-	neg	-	466.204	3.54097	M+Cl	C24H33NO6	0	48	HMDB0255800	-	-	-	-	-	Hydrocarbon derivatives	Tropones	Tropolones	0	48	-	-	1.013	1.0072	1.265e-05	4.092e-05	6.209	6.1191	6.1388	6.1011	6.1264	5.7399	5.7702	5.7536	5.915	5.7717
pos_1117	4a-Carboxy-4b-methyl-5a-cholesta-8,24-dien-3b-ol	metab_132	yes	C15808	pos	-	443.352	6.63155	M+H-H2O, M+H	C29H46O3	0	65.6	HMDB0062383;HMDB0001181	-	-	map01100;map01110;map00100	Metabolism;Metabolism;Metabolism	Global and overview maps;Global and overview maps;Lipid metabolism	Lipids and lipid-like molecules	Prenol lipids	Triterpenoids	0	65.6	Metabolic pathways;Biosynthesis of secondary metabolites;Steroid biosynthesis	Metabolic pathways;Biosynthesis of secondary metabolites;Steroid biosynthesis	1.2514	1.2288	0.0001375	0.0005026	5.5766	5.5234	5.5953	5.7078	5.8228	5.3138	5.1828	5.1664	5.2849	5.1952
pos_1155	Ganoderiol I	metab_174	yes	-	pos	114567-49-6	503.371	6.49632	M+H-2H2O, M+H	C31H50O5	0	70.1	HMDB0037778	-	-	-	-	-	Lipids and lipid-like molecules	Prenol lipids	Triterpenoids	0	70.1	-	-	1.9672	1.943	5.157e-05	0.0002326	5.9238	5.7835	5.8001	5.9348	6.0334	5.193	4.896	4.4393	4.9671	4.8618
pos_3090	Lucidenic acid J	metab_2309	yes	-	pos	-	532.294	5.24977	M+ACN+H	C27H38O8	0	48.8	HMDB0035700	-	-	-	-	-	Lipids and lipid-like molecules	Prenol lipids	Triterpenoids	0	48.8	-	-	1.9996	1.9869	5.208e-08	3.861e-06	4.6537	4.6728	4.8025	4.8653	4.9062	5.8394	5.8019	5.7616	5.772	5.8007
pos_3380	Barringtogenol C	metab_2627	yes	C08931	pos	17304-24-4;13844-01-4	513.353	6.02748	M+Na	C30H50O5	0	75.5	HMDB0034525	-	-	-	-	-	Lipids and lipid-like molecules	Prenol lipids	Triterpenoids	0	75.5	-	-	3.0222	2.9886	1.216e-06	2.695e-05	2.5234	2.3943	2.4952	2.9838	3.337	0.4303	0.4241	0.4201	0.4503	0.4266
pos_3728	Albigenic acid	metab_3005	yes	-	pos	664-40-4	505.386	7.10802	M+CH3OH+H	C30H48O4	0	35.5	HMDB0036638	-	-	-	-	-	Lipids and lipid-like molecules	Prenol lipids	Triterpenoids	0	35.5	-	-	1.5404	1.5124	0.001445	0.003409	4.9649	5.2305	4.7533	5.0329	5.0452	4.5923	4.3299	4.3277	4.4937	3.8886
pos_4688	Neogitogenin	metab_4060	yes	C17003	pos	6811-13-8	455.314	6.35318	M+Na	C27H44O4	0	71.9	HMDB0301778	-	-	-	-	-	Lipids and lipid-like molecules	Prenol lipids	Triterpenoids	0	71.9	-	-	2.0047	1.9828	1.914e-07	8.473e-06	5.8032	5.8588	5.8313	5.7813	5.8365	4.7805	4.8792	4.8633	4.9244	4.5831
pos_4739	Spirotaccagenin	metab_4117	yes	-	pos	-	429.3	6.29762	M+H-H2O	C27H42O5	0	31.9	HMDB0034424	-	-	-	-	-	Lipids and lipid-like molecules	Prenol lipids	Triterpenoids	0	31.9	-	-	1.074	1.0662	0.002283	0.00503	6.3098	6.4944	6.0774	6.1957	6.1265	5.9561	5.8964	5.8615	5.9407	5.8288
pos_4959	Contignasterol	metab_4360	yes	C19902	pos	137571-30-3	491.336	6.08332	M+H-H2O	C29H48O7	0	74.3	HMDB0250439	-	-	-	-	-	Lipids and lipid-like molecules	Prenol lipids	Triterpenoids	0	74.3	-	-	2.0781	2.0588	7.856e-06	5.418e-05	4.6218	4.4011	4.6402	4.0372	4.4783	3.2899	3.2799	3.3906	3.3212	3.284
pos_5395	Ganoderic acid F	metab_4840	yes	-	pos	98665-15-7	609.251	5.45047	M+K	C32H42O9	0	45.8	HMDB0035988	-	-	-	-	-	Lipids and lipid-like molecules	Prenol lipids	Triterpenoids	0	45.8	-	-	1.8181	1.8038	1.78e-07	8.061e-06	5.1579	5.3683	5.2202	5.4187	5.3232	6.1839	6.1678	6.0893	6.1349	6.1184
pos_5445	Ganoderic acid H	metab_4896	yes	-	pos	98665-19-1	617.272	5.34577	M+2Na-H	C32H44O9	0	30.8	HMDB0035987	-	-	-	-	-	Lipids and lipid-like molecules	Prenol lipids	Triterpenoids	0	30.8	-	-	1.0946	1.0904	0.0003719	0.001112	5.2328	5.3905	5.4142	5.5192	5.5192	5.8001	5.7757	5.6676	5.7539	5.7608
pos_6221	3-trans-p-Coumaroylrotundic acid	metab_5753	yes	-	pos	144624-03-3	698.408	3.85862	M+ACN+Na	C39H54O7	0	62.6	HMDB0040667	-	-	-	-	-	Lipids and lipid-like molecules	Prenol lipids	Triterpenoids	0	62.6	-	-	3.1548	3.1321	1.134e-07	6.203e-06	5.8409	5.4995	5.5041	5.0269	5.1592	2.9221	2.8521	2.8458	2.8934	2.8562
pos_6430	Betavulgaroside II	metab_5985	yes	-	pos	168010-05-7	757.373	3.52862	M+H-2H2O	C41H60O15	0	32.8	HMDB0040771	-	-	-	-	-	Lipids and lipid-like molecules	Prenol lipids	Triterpenoids	0	32.8	-	-	2.179	2.1622	0.0005951	0.001623	6.1038	5.9612	5.9443	5.7483	5.9147	4.1397	4.3093	4.6666	5.4862	4.422
pos_824	Lucidenic acid K	metab_7502	yes	-	pos	-	986.535	5.8998	M+H, 2M+ACN+H	C27H36O7	0	74	HMDB0035890	-	-	-	-	-	Lipids and lipid-like molecules	Prenol lipids	Triterpenoids	0	74	-	-	2.0669	2.0438	1.543e-07	7.351e-06	6.229	6.0567	6.1514	6.0474	6.1644	5.0355	5.0217	5.0032	5.254	4.9337
pos_4571	Smilagenin	metab_7751	yes	C08913	pos	126-18-1;126-19-2	399.325	6.5361	M+H-H2O	C27H44O3	0	53.7	HMDB0251863;HMDB0030024;HMDB0030048;LMST01080005	Steroids	27-Carbon atoms	-	-	-	Lipids and lipid-like molecules	Prenol lipids	Triterpenoids	0	53.7	-	-	1.0474	1.0478	2.676e-05	0.0001415	5.6773	5.7402	5.6721	5.7404	5.796	6.1057	6.015	5.9838	6.0315	5.9561
neg_259	Mabioside E	metab_9517	yes	-	neg	156980-56-2	518.229	4.3752	M-2H, M-H	C48H78O22S	0	81.2	HMDB0040654	-	-	-	-	-	Lipids and lipid-like molecules	Prenol lipids	Triterpenoids	0	81.2	-	-	1.2061	1.1946	3.839e-06	1.605e-05	6.2207	6.1639	6.2138	6.226	6.2712	5.7853	5.7242	5.6832	5.8495	5.6155
neg_3343	Torvoside G	metab_10350	yes	-	neg	184777-22-8	653.391	6.3358	M+FA-H	C34H56O9	0	39	HMDB0030337	-	-	-	-	-	Lipids and lipid-like molecules	Glycerolipids	Triradylcglycerols	0	39	-	-	1.2297	1.2185	5.44e-07	3.527e-06	6.6471	6.6538	6.5903	6.6683	6.6523	6.1502	6.1842	6.1087	6.2259	6.0383
pos_3434	Vicriviroc	metab_2686	yes	-	pos	-	516.299	6.13907	M+H-H2O	C28H38F3N5O2	0	53.3	HMDB0259804	-	-	-	-	-	Benzenoids	Benzene and substituted derivatives	Trifluoromethylbenzenes	0	53.3	-	-	1.0581	1.0494	1.51e-06	3.088e-05	6.9445	6.9786	7.0373	7.0419	7.0471	7.3148	7.3008	7.3023	7.2584	7.3123
pos_783	Fluvoxamino acid	metab_7456	yes	-	pos	88699-91-6	301.118	5.49047	M+H-H2O, M+H	C14H17F3N2O3	0	63.1	HMDB0060950	-	-	-	-	-	Benzenoids	Benzene and substituted derivatives	Trifluoromethylbenzenes	0	63.1	-	-	1.2493	1.2377	8.548e-05	0.0003487	5.2718	5.4904	5.3292	5.5743	5.3663	5.8348	5.875	5.7754	5.815	5.8241
neg_7278	Citric Acid	metab_14703	yes	C00158	neg	77-92-9	191.019	1.479	M-H	C6H8O7	75.8	0	PW_C000063;HMDB0000094;MJDBNL00000139	Organic acids	Carboxylic acids	map00997;map01240;map01200;map01110;map00020;map00630;map04922;map01066;map01065;map01064;map01063;map01062;map01061;map01060;map01100;map01120;map01210;map01230;map04742;map00720;map02020;map01053;map00250;map05230;map01070	Metabolism;Metabolism;Metabolism;Metabolism;Metabolism;Metabolism;Organismal Systems;Metabolism;Metabolism;Metabolism;Metabolism;Metabolism;Metabolism;Metabolism;Metabolism;Metabolism;Metabolism;Metabolism;Organismal Systems;Metabolism;Environmental Information Processing;Metabolism;Metabolism;Human Diseases;Metabolism	Biosynthesis of other secondary metabolites;Global and overview maps;Global and overview maps;Global and overview maps;Carbohydrate metabolism;Carbohydrate metabolism;Endocrine system;Chemical structure transformation maps;Chemical structure transformation maps;Chemical structure transformation maps;Chemical structure transformation maps;Chemical structure transformation maps;Chemical structure t…	Organic acids and derivatives	Carboxylic acids and derivatives	Tricarboxylic acids and derivatives	75.8	0	Biosynthesis of various secondary metabolites - part 3;Biosynthesis of cofactors;Carbon metabolism;Biosynthesis of secondary metabolites;Citrate cycle (TCA cycle);Glyoxylate and dicarboxylate metabolism;Glucagon signaling pathway;Biosynthesis of alkaloids derived from terpenoid and polyketide;Biosynthesis of alkaloids derived from histidine and purine;Biosynthesis of alkaloids derived from ornith…	Biosynthesis of various secondary metabolites - part 3;Biosynthesis of cofactors;Carbon metabolism;Biosynthesis of secondary metabolites;Citrate cycle (TCA cycle);Glyoxylate and dicarboxylate metabolism;Glucagon signaling pathway;Biosynthesis of alkaloids derived from terpenoid and polyketide;Biosynthesis of alkaloids derived from histidine and purine;Biosynthesis of alkaloids derived from ornith…	1.0287	1.0262	4.748e-05	0.0001178	6.5578	6.5218	6.5037	6.4645	6.3585	6.0282	6.0928	6.1056	6.2249	6.1104
pos_7034	4-Methyl-5-Thiazoleethanol	metab_6651	yes	C04294	pos	137-00-8	144.048	2.77982	M+H	C6H9NOS	88.7	0	HMDB0032985	-	-	map00730;map01100;map01240	Metabolism;Metabolism;Metabolism	Metabolism of cofactors and vitamins;Global and overview maps;Global and overview maps	Organoheterocyclic compounds	Azoles	Thiazoles	88.7	0	Thiamine metabolism;Metabolic pathways;Biosynthesis of cofactors	Thiamine metabolism;Metabolic pathways;Biosynthesis of cofactors	1.8991	1.9131	8.698e-05	0.0003524	4.1617	4.2918	3.9618	4.1541	4.2741	3.3508	3.376	3.2961	2.7316	3.2538
pos_5238	Phoenicoxanthin	metab_4667	yes	C15967	pos	-	625.358	5.796	M+2Na-H	C40H52O3	0	48.5	HMDB0248021	-	-	map00906;map01110	Metabolism;Metabolism	Metabolism of terpenoids and polyketides;Global and overview maps	Lipids and lipid-like molecules	Prenol lipids	Tetraterpenoids	0	48.5	Carotenoid biosynthesis;Biosynthesis of secondary metabolites	Carotenoid biosynthesis;Biosynthesis of secondary metabolites	1.6809	1.6923	2.732e-05	0.0001435	3.3199	3.3159	3.3251	3.3447	3.6232	4.0957	3.9797	4.0994	4.377	4.1537
pos_5418	Enterolactone	metab_4866	yes	C18165	pos	78473-71-9;185254-87-9	281.117	5.41047	M+H-H2O	C18H18O4	0	71.7	HMDB0006101	-	-	-	-	-	Lignans, neolignans and related compounds	Furanoid lignans	Tetrahydrofuran lignans	0	71.7	-	-	1.025	1.0344	0.01096	0.01931	2.4806	2.8794	2.4837	2.907	2.5422	3.0098	3.1043	3.0773	2.8901	2.936
pos_5960	Isodesmosine	metab_5462	yes	-	pos	991-01-5	590.303	4.31002	M+ACN+Na	C24H40N5O8+	0	52.3	HMDB0000739	-	-	-	-	-	Organic acids and derivatives	Carboxylic acids and derivatives	Tetracarboxylic acids and derivatives	0	52.3	-	-	1.3537	1.3471	0.000161	0.0005689	5.6558	5.5332	5.5771	5.4818	5.4967	5.0186	5.052	4.8531	5.281	5.0428
neg_2702	Tetraazacyclododecanetetraacetic acid	metab_9643	yes	-	neg	-	403.183	5.26573	M-H	C16H28N4O8	0	34.6	HMDB0257787	-	-	-	-	-	Organic acids and derivatives	Carboxylic acids and derivatives	Tetracarboxylic acids and derivatives	0	34.6	-	-	1.042	1.0336	1.928e-05	5.698e-05	5.1857	5.2194	5.1579	5.1959	5.0924	4.7176	4.8181	4.7849	4.9237	4.7542
pos_2459	Niveusin C	metab_1612	yes	C09517	pos	75680-27-2	392.181	3.52862	2M+3H2O+2H	C20H26O7	0	45.3	HMDB0034474	-	-	-	-	-	Lipids and lipid-like molecules	Prenol lipids	Terpene lactones	0	45.3	-	-	1.0721	1.0718	0.0002817	0.0008856	5.6377	5.4539	5.6145	5.4654	5.4972	5.1947	5.1925	5.1582	5.3525	5.182
pos_3013	Crispolide	metab_2224	yes	-	pos	83217-86-1	322.165	5.00175	M+ACN+H	C15H20O5	0	62	HMDB0036695	-	-	-	-	-	Lipids and lipid-like molecules	Prenol lipids	Terpene lactones	0	62	-	-	1.09	1.0865	0.0003588	0.00108	4.4674	4.6681	4.5737	4.7777	4.6833	5.0272	4.9966	4.9335	4.9263	4.9478
pos_3328	1,10-Epoxy-3,8-dihydroxy-4,11(13)-germacradien-12,6-olide	metab_2570	yes	-	pos	-	322.165	5.93182	M+ACN+H	C15H20O5	0	48.2	HMDB0303776	-	-	-	-	-	Lipids and lipid-like molecules	Prenol lipids	Terpene lactones	0	48.2	-	-	1.2954	1.2922	0.0005116	0.001435	4.7307	5.0086	4.6882	4.51	4.8109	5.273	5.1395	5.2112	5.2445	5.2469
pos_5407	3-Epinobilin	metab_4854	yes	-	pos	-	385.143	5.43447	M+K	C20H26O5	0	33.9	HMDB0036690	-	-	-	-	-	Lipids and lipid-like molecules	Prenol lipids	Terpene lactones	0	33.9	-	-	1.2558	1.248	4.164e-06	4.363e-05	5.2224	5.2936	5.2879	5.2582	5.3603	4.9344	4.9486	4.8874	4.8011	4.8272
pos_5758	Cepagenin	metab_5237	yes	-	pos	114317-59-8	491.279	4.72037	M+2Na-H	C27H42O5	0	34.4	HMDB0030913	-	-	-	-	-	Lipids and lipid-like molecules	Prenol lipids	Terpene lactones	0	34.4	-	-	1.5139	1.5001	6.463e-06	4.63e-05	5.5442	5.2957	5.4386	5.3382	5.3955	4.6951	4.7524	4.8767	4.8987	4.8154
pos_5906	Eremanthin	metab_5402	yes	C09406	pos	37936-58-6	253.118	4.41453	M+Na	C15H18O2	0	39.9	HMDB0302703	-	-	-	-	-	Lipids and lipid-like molecules	Prenol lipids	Terpene lactones	0	39.9	-	-	1.2378	1.2458	0.00529	0.01035	3.1203	3.5065	2.9386	3.525	3.5366	3.8229	3.7297	3.8199	3.7674	3.9279
pos_6562	Santamarin	metab_6129	yes	C09544	pos	4290-13-5	293.113	3.33638	M+2Na-H	C15H20O3	0	40.4	HMDB0302709	-	-	-	-	-	Lipids and lipid-like molecules	Prenol lipids	Terpene lactones	0	40.4	-	-	1.4809	1.4625	9.716e-06	6.403e-05	4.9784	5.1877	5.1442	5.2492	4.9965	5.7032	5.703	5.5929	5.7167	5.6771
pos_6770	Cynaroside A	metab_6358	yes	-	pos	117804-06-5	409.182	3.05703	M+H-2H2O	C21H32O10	0	82.2	HMDB0040532	-	-	-	-	-	Lipids and lipid-like molecules	Prenol lipids	Terpene lactones	0	82.2	-	-	1.1013	1.0901	8.129e-06	5.561e-05	5.3802	5.315	5.3417	5.3636	5.3263	5.0247	5.019	4.9949	5.141	4.9751
pos_5201	Artemisin	metab_7707	yes	C09344	pos	481-05-0	227.107	5.86782	M+H-2H2O	C15H18O4	0	55.7	LMPR0103190003;HMDB0248621	-	-	-	-	-	Lipids and lipid-like molecules	Prenol lipids	Terpene lactones	0	55.7	-	-	1.4499	1.4414	5.588e-07	1.665e-05	3.9196	3.9881	3.9672	3.9677	3.96	4.5682	4.5252	4.3631	4.5391	4.4892
neg_3607	Withaperuvin E	metab_10642	yes	-	neg	-	537.192	6.89828	M+K-2H	C28H36O8	0	34.2	HMDB0030127	-	-	-	-	-	Lipids and lipid-like molecules	Prenol lipids	Terpene lactones	0	34.2	-	-	1.3841	1.3943	0.0002604	0.0004995	5.582	5.5254	5.1888	5.7345	5.3694	6.0861	6.083	6.0791	6.3962	6.2593
neg_435	Arctiopicrin	metab_11463	yes	C09297	neg	19889-01-1	349.166	6.3048	M-H, M+Na-2H	C19H26O6	0	46.4	HMDB0301857	-	-	-	-	-	Lipids and lipid-like molecules	Prenol lipids	Terpene lactones	0	46.4	-	-	1.2701	1.2665	2.552e-05	7.137e-05	6.0094	6.2009	5.9084	5.999	5.9148	5.5844	5.4687	5.4242	5.4046	5.3708
neg_4355	Dehydrocostus lactone	metab_11469	yes	C09387	neg	477-43-0	689.388	6.54675	3M-H	C15H18O2	0	82	HMDB0250946	-	-	-	-	-	Lipids and lipid-like molecules	Prenol lipids	Terpene lactones	0	82	-	-	1.8672	1.934	0.0274	0.03545	4.887	5.0551	5.1574	4.985	5.2904	4.5432	1.8059	4.3968	1.87	4.2478
neg_4812	(1(10)E,4E,6a,9b)-9-(2-Methylpropanoyloxy)-1(10),4,11(13)-germacratrien-12,6-olide	metab_11976	yes	-	neg	-	363.181	5.95487	M+FA-H	C19H26O4	0	38.8	HMDB0031373	-	-	-	-	-	Lipids and lipid-like molecules	Prenol lipids	Terpene lactones	0	38.8	-	-	2.1347	2.1247	5.871e-06	2.254e-05	4.8266	4.3728	4.7733	4.3247	4.8501	2.7911	3.3354	3.0928	3.1894	3.0006
neg_5555	Taraxinic acid glucosyl ester	metab_12799	yes	-	neg	75911-14-7	469.172	4.98713	M+FA-H	C21H28O9	0	59.8	HMDB0035249	-	-	-	-	-	Lipids and lipid-like molecules	Prenol lipids	Terpene lactones	0	59.8	-	-	1.0322	1.0331	9.586e-06	3.277e-05	5.2569	5.351	5.1831	5.3626	5.3537	5.6844	5.7059	5.654	5.6348	5.6662
neg_5790	Bilobalide A	metab_13059	yes	C07605	neg	33570-04-6	325.096	4.61845	M-H	C15H18O8	0	57.5	HMDB0036735	-	-	-	-	-	Lipids and lipid-like molecules	Prenol lipids	Terpene lactones	0	57.5	-	-	1.4348	1.4496	6.098e-05	0.0001451	3.8137	3.9781	3.859	4.0106	3.965	3.159	3.3924	2.9935	3.0396	3.4126
neg_6393	Glaucarubin	metab_13725	yes	C08760	neg	1448-23-3	517.206	3.87193	M+Na-2H	C25H36O10	0	63.9	HMDB0035626	-	-	-	-	-	Lipids and lipid-like molecules	Prenol lipids	Terpene lactones	0	63.9	-	-	1.2251	1.2241	4.495e-05	0.0001127	6.045	5.8427	5.9456	5.7666	5.8319	5.2312	5.3799	5.3336	5.5036	5.3682
neg_6211	Cynaropicrin	metab_15369	yes	C09385	neg	35730-78-0	383.092	4.06838	M+K-2H	C19H22O6	0	57.5	HMDB0036423	-	-	-	-	-	Lipids and lipid-like molecules	Prenol lipids	Terpene lactones	0	57.5	-	-	1.7487	1.7532	8.057e-06	2.877e-05	3.9277	4.1485	4.3249	4.4683	4.3513	3.0968	3.3184	3.1308	3.1769	3.2834
pos_5427	Goshonoside F5	metab_4876	yes	-	pos	90851-28-8	611.343	5.38645	M+H-2H2O	C32H54O13	0	33.2	HMDB0038541	-	-	-	-	-	Lipids and lipid-like molecules	Prenol lipids	Terpene glycosides	0	33.2	-	-	1.0808	1.104	0.03584	0.05348	4.2341	3.8087	3.9813	3.6049	3.2875	4.143	4.1426	4.3086	4.3196	4.1123
pos_5768	Cichorioside N	metab_5248	yes	-	pos	-	459.26	4.69637	M+CH3OH+H	C22H34O8	0	51.4	HMDB0302058	-	-	-	-	-	Lipids and lipid-like molecules	Prenol lipids	Terpene glycosides	0	51.4	-	-	1.5143	1.4944	6.231e-06	4.485e-05	5.5704	5.5636	5.4674	5.4816	5.6322	4.9267	4.866	4.8611	5.1181	4.9925
pos_6038	(4R,5S,7R,11x)-11,12-Dihydroxy-1(10)-spirovetiven-2-one 12-glucoside	metab_5549	yes	-	pos	62574-29-2	447.26	4.14865	M+CH3OH+H	C21H34O8	0	66.4	HMDB0030895	-	-	-	-	-	Lipids and lipid-like molecules	Prenol lipids	Terpene glycosides	0	66.4	-	-	1.0765	1.0682	0.005047	0.009972	4.4362	4.4667	4.4032	4.3947	4.3105	3.8036	4.2394	4.0262	4.2508	3.8832
neg_3012	(4R,6S)-p-Menth-1-ene-4,6-diol 4-glucoside	metab_9985	yes	-	neg	359875-78-8	331.176	5.83668	M-H	C16H28O7	0	46.1	HMDB0038980	-	-	-	-	-	Lipids and lipid-like molecules	Prenol lipids	Terpene glycosides	0	46.1	-	-	2.4527	2.427	2.827e-05	7.749e-05	4.3705	4.4176	4.3728	4.3638	4.4152	2.0833	2.0982	2.117	3.3022	2.093
neg_3034	Maslinic acid 3-O-b-D-glucoside	metab_10009	yes	-	neg	163634-06-8	655.383	5.86083	M+Na-2H	C36H58O9	0	53.4	HMDB0029606	-	-	-	-	-	Lipids and lipid-like molecules	Prenol lipids	Terpene glycosides	0	53.4	-	-	1.9686	1.9546	1.963e-06	9.491e-06	6.6774	6.5243	6.6058	6.4323	6.5534	5.2168	5.1459	5.1298	5.6522	5.1645
neg_346	Steviobioside	metab_10478	yes	-	neg	41093-60-1	641.315	5.44175	M-H, M+FA-H	C32H50O13	0	68.8	HMDB0036707	-	-	-	-	-	Lipids and lipid-like molecules	Prenol lipids	Terpene glycosides	0	68.8	-	-	1.0043	1	9.138e-08	1.616e-06	5.9493	5.979	5.9487	5.9275	5.9258	5.6196	5.6415	5.6348	5.6092	5.5523
neg_4645	Sordarin	metab_11791	yes	-	neg	-	473.257	6.15708	M-H2O-H	C27H40O8	0	34.3	HMDB0242737	-	-	-	-	-	Lipids and lipid-like molecules	Prenol lipids	Terpene glycosides	0	34.3	-	-	1.9672	1.9648	1.118e-06	6.134e-06	5.7407	5.9261	5.6002	5.6902	5.589	4.6851	4.2638	4.2828	4.3289	4.4747
neg_4809	Geranyl arabinopyranosyl-glucoside	metab_11972	yes	-	neg	150995-11-2	429.212	5.95487	M-H2O-H	C21H36O10	0	32.8	HMDB0039573	-	-	-	-	-	Lipids and lipid-like molecules	Prenol lipids	Terpene glycosides	0	32.8	-	-	1.6816	1.658	0.001069	0.001758	5.6945	5.7314	5.5533	5.6788	5.6164	4.7543	4.4032	5.0652	4.9216	3.9114
neg_6262	Deoxyloganin	metab_13580	yes	C06071	neg	26660-57-1	419.158	4.01348	M+FA-H	C17H26O9	0	52.7	LMPR0102070005;HMDB0251007	-	-	map01100;map01110;map00902;map01062	Metabolism;Metabolism;Metabolism;Metabolism	Global and overview maps;Global and overview maps;Metabolism of terpenoids and polyketides;Chemical structure transformation maps	Lipids and lipid-like molecules	Prenol lipids	Terpene glycosides	0	52.7	Metabolic pathways;Biosynthesis of secondary metabolites;Monoterpenoid biosynthesis;Biosynthesis of terpenoids and steroids	Metabolic pathways;Biosynthesis of secondary metabolites;Monoterpenoid biosynthesis;Biosynthesis of terpenoids and steroids	1.002	0.9966	2.262e-06	1.058e-05	5.8467	5.7561	5.7697	5.7584	5.742	5.4208	5.3901	5.4494	5.5139	5.4123
neg_5110	(Z)-Resveratrol 3-(6''-sulfoglucopyranoside)	metab_12307	yes	-	neg	-	469.081	5.65393	M-H	C20H22O11S	0	36.8	HMDB0037077	-	-	-	-	-	Phenylpropanoids and polyketides	Stilbenes	Stilbene glycosides	0	36.8	-	-	1.2514	1.2498	5.535e-06	2.153e-05	4.9801	5.214	4.9772	5.1598	5.0032	5.6146	5.6199	5.5847	5.6086	5.5827
pos_5080	Corynanthine	metab_4493	yes	C09256	pos	146-48-5	418.212	5.99563	M+ACN+Na	C21H26N2O3	0	52.8	HMDB0250478;HMDB0015464	-	-	-	-	-	Lipids and lipid-like molecules	Steroids and steroid derivatives	Stigmastanes and derivatives	0	52.8	-	-	1.6609	1.6267	0.003875	0.007979	3.9752	4.2043	3.6211	3.2385	4.3553	3.0035	3.1075	2.9872	3.172	2.9975
pos_1492	Estriol-17-glucuronide	metab_547	yes	C11346	pos	7219-89-8	482.235	3.14508	M+H, M+NH4	C24H32O9	0	51.1	HMDB0010333	-	-	-	-	-	Lipids and lipid-like molecules	Steroids and steroid derivatives	Steroidal glycosides	0	51.1	-	-	1.2044	1.1927	1.875e-05	0.0001059	6.0647	5.9765	5.9478	5.8922	5.9803	5.6106	5.5151	5.5502	5.7014	5.5885
pos_5173	Goyaglycoside a	metab_4596	yes	-	pos	333332-41-5	671.413	5.8998	M+Na	C37H60O9	0	50.6	HMDB0038348	-	-	-	-	-	Lipids and lipid-like molecules	Steroids and steroid derivatives	Steroidal glycosides	0	50.6	-	-	1.8499	1.8287	2.805e-06	4.363e-05	5.7381	5.5753	5.7739	5.7128	5.7355	4.7593	4.7726	4.8188	5.0899	4.7067
pos_5203	Nuatigenin 3-[rhamnosyl-(1->2)-glucoside]	metab_4629	yes	-	pos	113561-09-4	752.425	5.85985	2M+3H2O+2H	C39H62O13	0	32	HMDB0033803	-	-	-	-	-	Lipids and lipid-like molecules	Steroids and steroid derivatives	Steroidal glycosides	0	32	-	-	1.0184	1.0171	9.213e-05	0.0003667	5.6446	5.5695	5.6365	5.5435	5.4679	5.286	5.2465	5.2345	5.3406	5.3379
neg_3389	Tuberoside	metab_10400	yes	-	neg	140447-21-8	637.396	6.42168	M+FA-H	C34H56O8	0	46.6	HMDB0039054	-	-	-	-	-	Lipids and lipid-like molecules	Steroids and steroid derivatives	Steroidal glycosides	0	46.6	-	-	1.093	1.0808	1.956e-05	5.766e-05	7.3329	7.4242	7.3625	7.4442	7.4292	7.0565	7.0076	6.9377	7.0931	6.8724
neg_3429	Collettiside I	metab_10445	yes	-	neg	14144-06-0	621.365	6.49198	M+FA-H	C33H52O8	0	33.1	LMST01080094;HMDB0029310	-	-	-	-	-	Lipids and lipid-like molecules	Steroids and steroid derivatives	Steroidal glycosides	0	33.1	-	-	1.047	1.0355	0.0001205	0.0002574	6.2775	6.3377	6.3851	6.4426	6.5064	6.0532	6.0218	5.9077	6.117	5.9378
neg_4878	Deoxycholic acid 3-glucuronide	metab_12047	yes	C03033	neg	72504-58-6	589.304	5.91565	M+Na-2H	C30H48O10	0	72.5	LMST05010046;HMDB0002596	-	-	map01100;map00040;map04976;map00053;map01240	Metabolism;Metabolism;Organismal Systems;Metabolism;Metabolism	Global and overview maps;Carbohydrate metabolism;Digestive system;Carbohydrate metabolism;Global and overview maps	Lipids and lipid-like molecules	Steroids and steroid derivatives	Steroidal glycosides	0	72.5	Metabolic pathways;Pentose and glucuronate interconversions;Bile secretion;Ascorbate and aldarate metabolism;Biosynthesis of cofactors	Metabolic pathways;Pentose and glucuronate interconversions;Bile secretion;Ascorbate and aldarate metabolism;Biosynthesis of cofactors	1.1992	1.2041	0.0005802	0.001022	6.0006	5.6745	5.9302	5.824	5.5446	5.3998	5.224	5.2147	5.3398	5.1032
pos_3521	Solanidine	metab_2781	yes	C06543	pos	80-78-4	461.348	6.36112	M+ACN+Na	C27H43NO	0	41.8	HMDB0003236;LMST01150007	-	-	map01066	Metabolism	Chemical structure transformation maps	Lipids and lipid-like molecules	Steroids and steroid derivatives	Steroidal alkaloids	0	41.8	Biosynthesis of alkaloids derived from terpenoid and polyketide	Biosynthesis of alkaloids derived from terpenoid and polyketide	2.6644	2.6551	1.725e-08	1.786e-06	4.5715	4.3213	4.6085	4.4568	4.793	6.2977	6.3612	6.3279	6.4017	6.351
neg_4667	Sabine	metab_11814	yes	-	neg	-	476.302	6.12623	M-H2O-H	C27H45NO7	0	49.5	HMDB0257435	-	-	-	-	-	Lipids and lipid-like molecules	Steroids and steroid derivatives	Steroidal alkaloids	0	49.5	-	-	1.1933	1.1934	0.003763	0.005568	5.5542	5.5614	5.5456	5.4566	5.5444	5.2765	5.0885	4.4346	5.0244	4.9699
pos_2618	Desglucocheirotoxol	metab_1787	yes	-	pos	29336-13-8	585.324	3.89062	M+CH3OH+H	C29H44O10	0	47.2	HMDB0033828	-	-	-	-	-	Lipids and lipid-like molecules	Steroids and steroid derivatives	Steroid lactones	0	47.2	-	-	1.607	1.5913	2.123e-08	2.064e-06	5.9238	5.8091	5.8934	5.8004	5.8857	5.1741	5.1741	5.2455	5.2566	5.208
pos_4757	Pubescenol	metab_4137	yes	-	pos	90685-93-1	507.331	6.28167	M+CH3OH+H	C28H42O6	0	55.1	LMPR0104300001;HMDB0030085	-	-	-	-	-	Lipids and lipid-like molecules	Steroids and steroid derivatives	Steroid lactones	0	55.1	-	-	1.0842	1.0806	0.01351	0.02319	4.1606	4.191	4.4679	4.7703	4.6638	4.064	4.054	4.0477	4.0953	4.058
pos_6055	Arenobufagin	metab_5568	yes	C20035	pos	464-74-4	434.256	4.12465	M+NH4	C24H32O6	0	80.3	HMDB0248571	-	-	-	-	-	Lipids and lipid-like molecules	Steroids and steroid derivatives	Steroid lactones	0	80.3	-	-	1.1563	1.1503	0.0003975	0.001174	4.7988	4.9955	4.7878	4.7961	4.806	4.4371	4.2987	4.4526	4.5346	4.5962
neg_2741	Digoxigenin bisdigitoxoside	metab_9685	yes	-	neg	-	685.342	5.31338	M+Cl	C35H54O11	0	79.1	HMDB0060818	-	-	-	-	-	Lipids and lipid-like molecules	Steroids and steroid derivatives	Steroid lactones	0	79.1	-	-	1.1572	1.1609	0.0002703	0.0005156	5.8319	5.6494	5.7528	5.4972	5.5782	5.1106	5.1058	5.0902	5.3601	5.2192
neg_3432	24-Epibrassinolide	metab_10449	yes	C11049	neg	72962-43-7;78821-43-9	479.338	6.49982	M-H	C28H48O6	0	30.7	HMDB0034081;HMDB0041130	-	-	-	-	-	Lipids and lipid-like molecules	Steroids and steroid derivatives	Steroid lactones	0	30.7	-	-	1.0393	1.0329	0.0006095	0.001066	5.4784	5.5426	5.5666	5.5191	5.5179	5.2367	5.2293	4.8879	5.2464	5.036
neg_5362	Scillipheosidin 3-[glucosyl-(1->2)-rhamnoside]	metab_12585	yes	-	neg	261158-68-3	689.315	5.27165	M-H2O-H	C36H52O14	0	44.2	HMDB0036946	-	-	-	-	-	Lipids and lipid-like molecules	Steroids and steroid derivatives	Steroid lactones	0	44.2	-	-	1.4512	1.4477	3.744e-05	9.728e-05	5.6655	5.4165	5.491	5.3187	5.3631	4.5444	4.6855	4.7885	4.9317	4.661
neg_5860	Dihydroergocryptine	metab_13137	yes	-	neg	-	612.3	4.5145	M+Cl	C32H43N5O5	0	48.3	HMDB0251310	-	-	-	-	-	Lipids and lipid-like molecules	Steroids and steroid derivatives	Steroid lactones	0	48.3	-	-	1.0587	1.0542	1.318e-05	4.232e-05	6.0673	6.0383	6.0499	5.9625	5.9489	5.5753	5.6091	5.5929	5.7581	5.6174
neg_6533	Physangulide	metab_13880	yes	-	neg	131749-58-1	557.257	3.714	M+Cl	C28H42O9	0	43.2	HMDB0037381	-	-	-	-	-	Lipids and lipid-like molecules	Steroids and steroid derivatives	Steroid lactones	0	43.2	-	-	1.2777	1.2739	4.608e-05	0.0001149	5.7907	5.4855	5.7811	5.6432	5.6771	5.0361	5.1433	5.0898	5.2615	5.0051
neg_3459	Brassinolide	metab_15367	yes	C08814	neg	72962-43-7;78821-43-9	461.327	6.53893	M-H2O-H	C28H48O6	0	83.2	HMDB0034081;HMDB0041130;LMST01140001	Steroids	28-Carbon atoms	map01100;map01110;map00905;map01070;map01062;map04075;map01060	Metabolism;Metabolism;Metabolism;Metabolism;Metabolism;Environmental Information Processing;Metabolism	Global and overview maps;Global and overview maps;Metabolism of terpenoids and polyketides;Chemical structure transformation maps;Chemical structure transformation maps;Signal transduction;Chemical structure transformation maps	Lipids and lipid-like molecules	Steroids and steroid derivatives	Steroid lactones	0	83.2	Metabolic pathways;Biosynthesis of secondary metabolites;Brassinosteroid biosynthesis;Biosynthesis of plant hormones;Biosynthesis of terpenoids and steroids;Plant hormone signal transduction;Biosynthesis of plant secondary metabolites	Metabolic pathways;Biosynthesis of secondary metabolites;Brassinosteroid biosynthesis;Biosynthesis of plant hormones;Biosynthesis of terpenoids and steroids;Plant hormone signal transduction;Biosynthesis of plant secondary metabolites	1.754	1.7426	3.91e-07	2.677e-06	6.2492	6.0173	6.1847	6.1975	6.2525	5.1694	5.239	5.0807	5.2963	5.0008
pos_4935	Beta-Estradiol 17-propionate	metab_4334	yes	-	pos	-	351.191	6.10727	M+Na	C21H28O3	0	31.4	HMDB0251965	-	-	-	-	-	Lipids and lipid-like molecules	Steroids and steroid derivatives	Steroid esters	0	31.4	-	-	2.4765	2.4483	0.0001905	0.0006474	5.101	5.0745	5.0582	5.0143	5.0509	2.7749	3.7753	3.9308	3.7206	2.769
pos_3575	Fusidic Acid	metab_7719	yes	C06694	pos	54-31-9;6990-06-3	517.349	6.54405	M+H	C31H48O6	0	46.6	HMDB0015570;HMDB0001933;MJDBOTE0000983	Antibiotics	Others	-	-	-	Lipids and lipid-like molecules	Steroids and steroid derivatives	Steroid esters	0	46.6	-	-	1.9152	1.8922	3.153e-05	0.0001589	5.1949	4.9957	5.5415	5.2767	5.303	6.0787	6.2485	6.3768	6.0333	6.3923
pos_843	25-Cinnamoyl-vulgaroside	metab_7523	yes	-	pos	172616-90-9	531.31	6.01948	M+H-2H2O, M+H	C34H46O7	0	50.4	HMDB0041367	-	-	-	-	-	Lipids and lipid-like molecules	Prenol lipids	Sesterterpenoids	0	50.4	-	-	1.2869	1.2768	7.233e-08	4.639e-06	6.4501	6.5108	6.472	6.5562	6.542	6.945	6.9343	6.904	6.9003	6.9491
pos_1272	5-Hydroxy-4-methoxybisabola-2,10-dien-9-one	metab_303	yes	-	pos	-	289.18	6.13112	M+Na, M+K	C16H26O3	0	70.4	HMDB0302604	-	-	-	-	-	Lipids and lipid-like molecules	Prenol lipids	Sesquiterpenoids	0	70.4	-	-	1.3421	1.3307	7.251e-08	4.639e-06	5.9935	6.0659	5.9806	6.0704	6.0171	5.5696	5.5783	5.5825	5.6116	5.513
pos_1389	Armillarivin	metab_432	yes	-	pos	135247-97-1	448.207	5.29777	M+ACN+Na, 2M+H	C23H28O5	0	33.4	HMDB0038917	-	-	-	-	-	Lipids and lipid-like molecules	Prenol lipids	Sesquiterpenoids	0	33.4	-	-	2.6884	2.6643	1.062e-06	2.522e-05	5.3021	4.5107	5.2033	4.8362	5.0065	3.1204	3.1104	3.104	3.1517	3.1144
pos_224	11'-Carboxy-gamma-chromanol	metab_1371	yes	-	pos	-	369.279	6.5122	M+H-2H2O, 2M+Na, M+H-H2O	C25H40O4	0	64.7	HMDB0012517	-	-	-	-	-	Lipids and lipid-like molecules	Prenol lipids	Sesquiterpenoids	0	64.7	-	-	1.2903	1.2765	0.0004681	0.001334	6.8059	6.6884	6.7548	6.6878	6.8528	6.4379	6.299	6.1281	6.4894	6.141
pos_2315	1alpha-1-Hydroxy-2,4(18),11(13)-eudesmatrien-12-oic acid	metab_1454	yes	-	pos	135594-81-9	312.155	3.18545	M+ACN+Na	C15H20O3	0	48.2	HMDB0037557	-	-	-	-	-	Lipids and lipid-like molecules	Prenol lipids	Sesquiterpenoids	0	48.2	-	-	1.266	1.2571	0.0003872	0.001148	4.6086	4.6313	4.5853	4.6212	4.448	3.9564	4.0394	4.2295	4.3421	4.0882
pos_2653	3,7,8,15-Scirpenetetrol	metab_1826	yes	-	pos	128534-67-8	614.315	3.97932	2M+NH4	C15H22O6	0	34.6	HMDB0037560	-	-	-	-	-	Lipids and lipid-like molecules	Prenol lipids	Sesquiterpenoids	0	34.6	-	-	1.0492	1.0414	2.281e-05	0.0001242	5.7591	5.7022	5.7236	5.6796	5.6782	5.4086	5.3773	5.3871	5.535	5.3876
pos_3072	7,8-Dehydro-3,4-dihydro-beta-ionol	metab_2289	yes	-	pos	57069-86-0	239.139	5.19377	M+2Na-H	C13H22O	0	32.1	HMDB0036184	-	-	-	-	-	Lipids and lipid-like molecules	Prenol lipids	Sesquiterpenoids	0	32.1	-	-	1.2061	1.2036	0.0006326	0.001707	3.9632	4.2842	4.2112	4.3741	4.3446	4.719	4.6652	4.5873	4.6317	4.6498
pos_3186	2-beta-Ethoxydihydrophytuberin	metab_2415	yes	-	pos	-	358.259	5.53912	M+NH4	C19H32O5	0	35.5	HMDB0302962	-	-	-	-	-	Lipids and lipid-like molecules	Prenol lipids	Sesquiterpenoids	0	35.5	-	-	1.0468	1.0346	9.907e-06	6.485e-05	4.7954	4.8652	4.8199	4.8995	4.8794	4.6248	4.5349	4.5204	4.6159	4.5478
pos_3405	(7b,10a)-3-Hydroxy-1,3,5-cadinatrien-9-one	metab_2655	yes	-	pos	155662-80-9	265.18	6.07533	M+CH3OH+H	C15H20O2	0	44.1	HMDB0040981	-	-	-	-	-	Lipids and lipid-like molecules	Prenol lipids	Sesquiterpenoids	0	44.1	-	-	1.2978	1.2743	0.0001238	0.0004618	4.838	4.7253	4.6919	4.7768	4.9199	4.3905	4.2048	4.4785	4.3912	4.2492
pos_3649	(+)-Dehydrovomifoliol	metab_2918	yes	C02533	pos	-	205.122	6.8064	M+H-H2O	C13H18O3	0	78.9	HMDB0302822	-	-	-	-	-	Lipids and lipid-like molecules	Prenol lipids	Sesquiterpenoids	0	78.9	-	-	1.3237	1.2998	0.003667	0.007587	3.9765	3.5444	4.0017	4.1653	4.3016	3.4518	3.5502	3.4355	3.4831	3.4459
pos_4646	(ent-2b,4S,9a)-2,4,9-Trihydroxy-10(14)-oplopen-3-one 2-(2-methylbutanoate) 9-(3-methyl-2E-pentenoate)	metab_4017	yes	-	pos	80489-86-7	413.266	6.40085	M+H-2H2O	C26H40O6	0	33.8	HMDB0040993	-	-	-	-	-	Lipids and lipid-like molecules	Prenol lipids	Sesquiterpenoids	0	33.8	-	-	1.4647	1.4477	0.001244	0.003003	5.413	5.3146	5.2862	5.1978	5.4145	5.1116	4.5127	4.5613	4.8625	4.5168
pos_4952	10-Hydroxy-3-methoxy-1,3,5,7-cadinatetraen-9-one	metab_4353	yes	C09695	pos	72843-51-7	243.138	6.09132	M+H-H2O	C16H20O3	0	50.8	HMDB0036456	-	-	-	-	-	Lipids and lipid-like molecules	Prenol lipids	Sesquiterpenoids	0	50.8	-	-	1.7909	1.778	2.356e-07	9.912e-06	4.2911	4.2448	4.188	4.2506	4.3525	3.4081	3.3981	3.3918	3.4394	3.6205
pos_5190	3,11,12-Trihydroxy-1(10)-spirovetiven-2-one	metab_4615	yes	-	pos	84321-96-0	269.174	5.8838	M+H	C15H24O4	0	31.3	HMDB0038154	-	-	-	-	-	Lipids and lipid-like molecules	Prenol lipids	Sesquiterpenoids	0	31.3	-	-	1.7572	1.74	0.0107	0.01893	3.513	3.9989	3.9478	4.0875	3.8876	2.9065	2.26	2.2536	3.778	3.178
pos_5534	(+)-Abscisic Acid	metab_4992	yes	C06082	pos	21293-29-8	265.143	5.18575	M+H	C15H20O4	62	0	HMDB0035140	-	-	map01100;map01110;map00906;map01070;map01062;map04075;map01060	Metabolism;Metabolism;Metabolism;Metabolism;Metabolism;Environmental Information Processing;Metabolism	Global and overview maps;Global and overview maps;Metabolism of terpenoids and polyketides;Chemical structure transformation maps;Chemical structure transformation maps;Signal transduction;Chemical structure transformation maps	Lipids and lipid-like molecules	Prenol lipids	Sesquiterpenoids	62	0	Metabolic pathways;Biosynthesis of secondary metabolites;Carotenoid biosynthesis;Biosynthesis of plant hormones;Biosynthesis of terpenoids and steroids;Plant hormone signal transduction;Biosynthesis of plant secondary metabolites	Metabolic pathways;Biosynthesis of secondary metabolites;Carotenoid biosynthesis;Biosynthesis of plant hormones;Biosynthesis of terpenoids and steroids;Plant hormone signal transduction;Biosynthesis of plant secondary metabolites	2.1974	2.1813	0.001057	0.002621	2.9207	2.4066	1.601	1.8458	1.5259	3.5733	3.4633	3.1978	3.3494	3.5647
pos_3598	Dehydrovomifoliol	metab_7709	yes	C02533	pos	15764-81-5	205.122	6.63155	M+H-H2O	C13H18O3	0	74.3	HMDB0036819;LMPR0103050009;HMDB0302822	-	-	-	-	-	Lipids and lipid-like molecules	Prenol lipids	Sesquiterpenoids	0	74.3	-	-	1.0526	1.0231	0.03389	0.05104	4.2181	4.5787	4.5966	4.7568	4.8569	4.4401	4.1882	3.9528	4.4717	3.9632
neg_1757	Furanodienone	metab_8596	yes	C16960	neg	24268-41-5	251.104	3.74533	M+Na-2H	C15H18O2	0	44.8	HMDB0036768	-	-	-	-	-	Lipids and lipid-like molecules	Prenol lipids	Sesquiterpenoids	0	44.8	-	-	1.2539	1.245	6.141e-07	3.87e-06	6.5768	6.4472	6.4948	6.4792	6.5321	5.9224	5.9549	5.9794	6.0951	5.9634
neg_1900	Farnesylcysteine	metab_8756	yes	C19691	neg	68000-92-0	360.178	3.9267	M+Cl	C18H31NO2S	0	43.7	HMDB0011627	-	-	map01110;map00900	Metabolism;Metabolism	Global and overview maps;Metabolism of terpenoids and polyketides	Lipids and lipid-like molecules	Prenol lipids	Sesquiterpenoids	0	43.7	Biosynthesis of secondary metabolites;Terpenoid backbone biosynthesis	Biosynthesis of secondary metabolites;Terpenoid backbone biosynthesis	1.0471	1.0425	2.132e-06	1.011e-05	6.1935	6.0891	6.1358	6.0733	6.0916	5.7033	5.7361	5.7503	5.8284	5.7211
neg_2932	Capsidiol	metab_9897	yes	C09627	neg	37208-05-2	273.125	5.67743	M+K-2H	C15H24O2	0	36	HMDB0002352;LMPR0103250002	-	-	map00909	Metabolism	Metabolism of terpenoids and polyketides	Lipids and lipid-like molecules	Prenol lipids	Sesquiterpenoids	0	36	Sesquiterpenoid and triterpenoid biosynthesis	Sesquiterpenoid and triterpenoid biosynthesis	1.0897	1.0815	0.0007399	0.001267	4.1913	4.4389	4.2762	4.4633	4.0457	4.8108	4.7534	4.6441	4.7131	4.688
neg_3064	Fusarin C	metab_10042	yes	C19243	neg	79748-81-5	412.18	5.89217	M-H2O-H	C23H29NO7	0	53.7	HMDB0033337	-	-	-	-	-	Lipids and lipid-like molecules	Prenol lipids	Sesquiterpenoids	0	53.7	-	-	1.2509	1.2426	1.556e-07	1.616e-06	5.3853	5.4592	5.4571	5.5148	5.4883	4.9426	4.9452	4.9743	4.9924	4.8654
neg_4344	11'-Carboxy-alpha-chromanol	metab_11457	yes	-	neg	-	417.301	6.56238	M-H	C26H42O4	0	81.3	HMDB0012515	-	-	-	-	-	Lipids and lipid-like molecules	Prenol lipids	Sesquiterpenoids	0	81.3	-	-	1.1336	1.1282	0.001295	0.002089	5.6818	6.1615	5.6507	5.7451	5.6804	5.2512	5.3844	5.3577	5.2598	5.2486
neg_4668	Cinncassiol C3	metab_11815	yes	C17641	neg	64979-94-8	381.195	6.12623	M-H	C20H30O7	0	34.1	HMDB0036859	-	-	-	-	-	Lipids and lipid-like molecules	Prenol lipids	Sesquiterpenoids	0	34.1	-	-	1.0003	0.9972	4.641e-05	0.0001156	5.0765	4.8677	4.9092	5.0192	4.8761	4.5728	4.5879	4.6069	4.653	4.5826
neg_4984	Toxin T2 tetrol	metab_12165	yes	-	neg	34114-99-3	343.14	5.84515	M+FA-H	C15H22O6	0	38.5	HMDB0036159	-	-	-	-	-	Lipids and lipid-like molecules	Prenol lipids	Sesquiterpenoids	0	38.5	-	-	1.405	1.4009	6.037e-09	4.516e-07	5.5751	5.5553	5.5563	5.6188	5.6019	4.9427	4.8962	5.0113	4.89	4.9103
neg_6087	Deoxynivalenol 3-glucoside	metab_13388	yes	-	neg	131180-21-7	503.179	4.20215	M+FA-H	C21H30O11	0	36	HMDB0039852	-	-	-	-	-	Lipids and lipid-like molecules	Prenol lipids	Sesquiterpenoids	0	36	-	-	1.0604	1.0544	5.123e-05	0.0001256	5.9105	6	6.0166	5.9706	5.8622	5.4735	5.4771	5.5688	5.6946	5.5894
neg_6770	S-Farnesyl cysteine	metab_14142	yes	C19691	neg	68000-92-0	360.178	3.47777	M+Cl	C18H31NO2S	0	38.5	HMDB0011627;HMDB0257400	-	-	map01110;map00900	Metabolism;Metabolism	Global and overview maps;Metabolism of terpenoids and polyketides	Lipids and lipid-like molecules	Prenol lipids	Sesquiterpenoids	0	38.5	Biosynthesis of secondary metabolites;Terpenoid backbone biosynthesis	Biosynthesis of secondary metabolites;Terpenoid backbone biosynthesis	1.1989	1.1937	4.391e-06	1.786e-05	6.6592	6.4991	6.5876	6.4763	6.549	5.999	6.0582	6.0691	6.1796	6.036
neg_709	Eremopetasidione	metab_14497	yes	-	neg	163135-94-2	281.139	5.4947	M+FA-H, 2M-H	C14H20O3	0	60.2	HMDB0040778	-	-	-	-	-	Lipids and lipid-like molecules	Prenol lipids	Sesquiterpenoids	0	60.2	-	-	1.2073	1.2021	4.321e-08	1.578e-06	5.2533	5.2887	5.1858	5.1759	5.179	4.725	4.7097	4.7333	4.7439	4.7564
pos_4964	Retinyl propionate	metab_4366	yes	-	pos	-	307.242	6.08332	M+H-2H2O	C23H34O2	0	45.9	HMDB0257180	-	-	-	-	-	Lipids and lipid-like molecules	Prenol lipids	Retinoids	0	45.9	-	-	1.6979	1.7	6.604e-05	0.0002839	4.7019	4.8009	4.7078	4.7203	4.6939	4.2714	4.0247	3.8758	3.6547	3.9356
pos_6561	4-Oxo-13-cis-retinoate	metab_6128	yes	-	pos	-	378.202	3.33638	M+ACN+Na	C20H26O3	0	35	HMDB0012789	-	-	-	-	-	Lipids and lipid-like molecules	Prenol lipids	Retinoids	0	35	-	-	1.2356	1.2246	4.231e-05	0.0001988	5.9599	5.7002	5.7965	5.7359	5.8163	5.4125	5.3094	5.4056	5.4471	5.4123
neg_2573	Ubiquinone-2	metab_9499	yes	C00399	neg	606-06-4	363.184	5.04743	M+FA-H	C19H26O4	0	44.1	HMDB0006709	-	-	map01100;map00190;map02020;map01240	Metabolism;Metabolism;Environmental Information Processing;Metabolism	Global and overview maps;Energy metabolism;Signal transduction;Global and overview maps	Lipids and lipid-like molecules	Prenol lipids	Quinone and hydroquinone lipids	0	44.1	Metabolic pathways;Oxidative phosphorylation;Two-component system;Biosynthesis of cofactors	Metabolic pathways;Oxidative phosphorylation;Two-component system;Biosynthesis of cofactors	1.0775	1.0769	1.919e-05	5.682e-05	5.5856	5.4258	5.4803	5.3818	5.3939	4.985	5.0039	5.0639	5.1127	5.0953
pos_3035	N-Methylschinifoline	metab_2248	yes	-	pos	149998-43-6	273.16	5.07375	M+NH4	C16H17NO2	0	36	HMDB0040381	-	-	-	-	-	Organoheterocyclic compounds	Quinolines and derivatives	Quinolones and derivatives	0	36	-	-	1.4653	1.4412	0.001032	0.002573	3.6378	3.6396	3.6979	3.3797	3.9183	2.9595	2.9495	3.3874	2.9907	2.9535
neg_1557	Rutalinium	metab_8374	yes	-	neg	27539-40-8	325.107	3.49345	M+Cl	C16H20NO4+	0	40.1	HMDB0033348	-	-	-	-	-	Organoheterocyclic compounds	Quinolines and derivatives	Quinolones and derivatives	0	40.1	-	-	1.4608	1.4505	0.002166	0.003343	4.9236	5.4099	4.9693	5.3979	4.907	4.4974	4.6222	4.1392	4.4288	3.8224
neg_6855	4'-Hydroxycilostazol, trans-	metab_14236	yes	-	neg	-	406.183	3.3988	M+Na-2H	C20H27N5O3	0	49.2	HMDB0247541	-	-	-	-	-	Organoheterocyclic compounds	Quinolines and derivatives	Quinolones and derivatives	0	49.2	-	-	1.0043	1.0003	0.0001728	0.0003488	5.6961	5.6868	5.6955	5.5978	5.6082	5.2154	5.2036	5.2808	5.4787	5.3197
pos_3205	Kynurenic Acid	metab_2436	yes	C01717	pos	492-27-3	190.05	5.6116	M+H	C10H7NO3	92.7	0	PW_C000566;HMDB0000715;MJDBOTE0000367	-	-	map01100;map00380	Metabolism;Metabolism	Global and overview maps;Amino acid metabolism	Organoheterocyclic compounds	Quinolines and derivatives	Quinoline carboxylic acids	92.7	0	Metabolic pathways;Tryptophan metabolism	Metabolic pathways;Tryptophan metabolism	1.8381	1.8149	1.154e-05	7.276e-05	3.4895	3.2567	3.3114	3.6313	3.7258	2.6233	2.5834	2.577	2.6246	2.6468
pos_6030	Merafloxacin	metab_5541	yes	-	pos	-	397.208	4.18067	M+NH4	C19H23F2N3O3	0	42.7	HMDB0254459	-	-	-	-	-	Organoheterocyclic compounds	Quinolines and derivatives	Quinoline carboxylic acids	0	42.7	-	-	1.1673	1.1531	7.059e-07	1.938e-05	5.276	5.193	5.2222	5.248	5.2643	4.8808	4.9197	4.879	4.9556	4.8381
neg_1629	8-Methoxykynurenate	metab_8454	yes	C05830	neg	2929-14-8	264.051	3.58013	M+FA-H	C11H9NO4	0	70.2	HMDB0060426	-	-	map00380	Metabolism	Amino acid metabolism	Organoheterocyclic compounds	Quinolines and derivatives	Quinoline carboxylic acids	0	70.2	Tryptophan metabolism	Tryptophan metabolism	1.2249	1.23	0.0009529	0.001584	3.4277	3.459	3.4205	3.435	3.97	4.1385	4.1559	4.1988	3.9912	4.0927
neg_6536	Cyclic 6-Hydroxymelatonin	metab_13883	yes	-	neg	-	283.049	3.714	M+K-2H	C13H14N2O3	0	51.2	HMDB0060810	-	-	-	-	-	Organoheterocyclic compounds	Indoles and derivatives	Pyrroloindoles	0	51.2	-	-	2.2258	2.2207	0.0005834	0.001026	0.6326	0.6291	0.6271	2.1047	0.6274	2.7791	2.5487	3.3544	2.6634	2.4574
pos_2016	Queuine	metab_1126	yes	C01449	pos	72496-59-4	278.124	2.57222	M+H	C12H15N5O3	0	54	HMDB0001495	-	-	-	-	-	Organoheterocyclic compounds	Pyrrolopyrimidines	Pyrrolo[2,3-d]pyrimidines	0	54	-	-	1.0221	1.0224	0.001057	0.00262	4.6534	4.667	4.4777	4.4917	4.434	4.1658	4.1524	4.316	4.2314	4.3349
pos_7043	7-Aminomethyl-7-carbaguanine	metab_6661	yes	C16675	pos	-	180.088	2.77185	M+H	C7H9N5O	0	59.5	HMDB0011690	-	-	map01100;map00790	Metabolism;Metabolism	Global and overview maps;Metabolism of cofactors and vitamins	Organoheterocyclic compounds	Pyrrolopyrimidines	Pyrrolo[2,3-d]pyrimidines	0	59.5	Metabolic pathways;Folate biosynthesis	Metabolic pathways;Folate biosynthesis	1.0621	1.0682	8.398e-05	0.0003446	5.3955	5.437	5.4631	5.5333	5.5132	5.2263	5.2298	5.1864	5.0531	5.1392
neg_5650	1-Hydroxy-2,2,5,5-tetramethyl-2,5-dihydro-1h-pyrrole-3-carboxamide	metab_12904	yes	-	neg	-	413.24	4.84137	2M+FA-H	C9H16N2O2	0	33.9	HMDB0243893	-	-	-	-	-	Organoheterocyclic compounds	Pyrrolines	Pyrroline carboxylic acids and derivatives	0	33.9	-	-	1.0681	1.0652	5.071e-06	2.005e-05	6.2207	6.1275	6.1512	6.0626	6.0648	5.7057	5.6974	5.7443	5.8151	5.727
pos_6128	(2-Pyridin-3-ylpyrrolidin-1-yl)methanol	metab_5649	yes	-	pos	-	374.253	4.00333	2M+NH4	C10H14N2O	0	33.9	HMDB0242480	-	-	-	-	-	Organoheterocyclic compounds	Pyridines and derivatives	Pyrrolidinylpyridines	0	33.9	-	-	1.7595	1.7442	7.95e-07	2.05e-05	3.8066	3.9004	4.0814	3.8385	4.0207	3.2191	3.096	3.0897	3.1373	3.1597
pos_1949	5-Methylcytosine	metab_1050	yes	C02376	pos	554-01-8	126.066	1.88452	M+H	C5H7N3O	41	0	HMDB0002894;MJDBOTE0000559	-	-	map00240;map01100	Metabolism;Metabolism	Nucleotide metabolism;Global and overview maps	Organoheterocyclic compounds	Diazines	Pyrimidines and pyrimidine derivatives	41	0	Pyrimidine metabolism;Metabolic pathways	Pyrimidine metabolism;Metabolic pathways	2.5734	2.5609	1.061e-08	1.367e-06	3.1516	3.1477	3.1569	3.1764	3.1737	4.6581	4.7903	4.7624	5.0776	4.8677
pos_5251	13-Demethyl tacrolimus	metab_4682	yes	C07649	pos	-	754.45	5.7721	M+H-2H2O	C43H67NO12	0	72.5	HMDB0060706	-	-	map04976;map00983	Organismal Systems;Metabolism	Digestive system;Xenobiotics biodegradation and metabolism	Organoheterocyclic compounds	Diazines	Pyrimidines and pyrimidine derivatives	0	72.5	Bile secretion;Drug metabolism - other enzymes	Bile secretion;Drug metabolism - other enzymes	1.8813	1.8581	2.482e-05	0.0001333	5.9509	5.8731	6.0509	5.9429	6.0372	4.8747	5.0329	5.025	5.4276	4.8674
pos_5852	2,4(1H,3H)-Pyrimidinedione, 5-fluoro-1-(tetrahydro-2-furanyl)-, (R)-	metab_5342	yes	C12673	pos	-	233.092	4.51983	M+CH3OH+H	C8H9FN2O3	0	47.1	HMDB0246215	-	-	map00983	Metabolism	Xenobiotics biodegradation and metabolism	Organoheterocyclic compounds	Diazines	Pyrimidines and pyrimidine derivatives	0	47.1	Drug metabolism - other enzymes	Drug metabolism - other enzymes	1.0357	1.0275	1.773e-06	3.359e-05	4.5776	4.6661	4.6467	4.6755	4.6676	4.9438	4.9606	4.9241	4.8883	4.8981
pos_7136	1-Methylcytosine	metab_6764	yes	-	pos	-	126.066	2.636	M+H	C5H7N3O	0	30.1	HMDB0243939	-	-	-	-	-	Organoheterocyclic compounds	Diazines	Pyrimidines and pyrimidine derivatives	0	30.1	-	-	1.2329	1.2243	0.0007637	0.001996	3.7455	3.6074	3.8894	3.9638	3.8508	4.1189	4.1122	4.2819	4.3376	4.3652
neg_7086	Carmofur	metab_14493	yes	C13252	neg	61422-45-5	559.237	3.20182	2M+FA-H	C11H16FN3O3	0	65.7	HMDB0249685	-	-	map00983	Metabolism	Xenobiotics biodegradation and metabolism	Organoheterocyclic compounds	Diazines	Pyrimidines and pyrimidine derivatives	0	65.7	Drug metabolism - other enzymes	Drug metabolism - other enzymes	1.9764	1.9609	1.003e-06	5.602e-06	6.3462	6.0888	6.232	6.1524	6.2878	4.9093	4.8525	4.8555	5.2489	4.738
pos_2063	Methyl-3H-thymidine	metab_1177	yes	-	pos	-	257.113	2.70018	M+H	C11H16N2O5	0	36.1	HMDB0254620	-	-	-	-	-	Nucleosides, nucleotides, and analogues	Pyrimidine nucleosides	Pyrimidine 2''-deoxyribonucleosides	0	36.1	-	-	1.2405	1.2306	1.501e-05	8.946e-05	4.3216	4.4194	4.2538	4.4593	4.3613	4.8116	4.7777	4.8126	4.681	4.7501
pos_6680	2'-Fluorothymidine	metab_6259	yes	-	pos	-	225.069	3.17705	M+H-2H2O	C10H13FN2O5	0	36.4	HMDB0245532	-	-	-	-	-	Nucleosides, nucleotides, and analogues	Pyrimidine nucleosides	Pyrimidine 2''-deoxyribonucleosides	0	36.4	-	-	1.1483	1.1416	0.0002433	0.0007851	5.4397	5.6161	5.5625	5.6528	5.7604	5.3105	5.2929	5.2219	5.2142	5.213
pos_7191	Deoxyuridine	metab_6825	yes	C00526	pos	951-78-0	251.064	2.52433	M+Na	C9H12N2O5	0	34.8	HMDB0245528;PW_C000007;HMDB0000012;MJDBOTE0000510	Nucleic acids	Nucleosides	map00240;map01100;map02010	Metabolism;Metabolism;Environmental Information Processing	Nucleotide metabolism;Global and overview maps;Membrane transport	Nucleosides, nucleotides, and analogues	Pyrimidine nucleosides	Pyrimidine 2''-deoxyribonucleosides	0	34.8	Pyrimidine metabolism;Metabolic pathways;ABC transporters	Pyrimidine metabolism;Metabolic pathways;ABC transporters	1.5906	1.5694	0.000165	0.0005786	3.522	3.518	3.927	3.7825	3.544	4.3886	4.4976	4.4228	4.2059	4.1932
neg_6391	Gemcitabine	metab_13723	yes	C07650	neg	95058-81-4	300.018	3.87977	M+K-2H	C9H11F2N3O4	0	37.9	PW_C008951;HMDB0014584	-	-	-	-	-	Nucleosides, nucleotides, and analogues	Pyrimidine nucleosides	Pyrimidine 2''-deoxyribonucleosides	0	37.9	-	-	1.2109	1.2034	0.0009118	0.001523	4.1715	4.4164	4.5837	4.5305	4.6441	4.0845	3.8263	4.0028	3.9955	3.7259
pos_1511	2',3'-Dideoxyuridine	metab_569	yes	-	pos	-	230.114	2.93752	M+H, M+NH4	C9H12N2O4	0	37	HMDB0245547	-	-	-	-	-	Nucleosides, nucleotides, and analogues	Pyrimidine nucleosides	Pyrimidine 2'',3''-dideoxyribonucleosides	0	37	-	-	1.1337	1.123	9.98e-06	6.519e-05	6.3174	6.2741	6.2205	6.1688	6.2185	5.9357	5.8882	5.8655	5.9788	5.8598
pos_7470	Zalcitabine	metab_7126	yes	C07207	pos	5718-77-4;7481-89-2	253.129	0.937883	M+ACN+H	C9H13N3O3	0	50.1	HMDB0015078;HMDB0255802;HMDB0037019;PW_C009386	-	-	map04976	Organismal Systems	Digestive system	Nucleosides, nucleotides, and analogues	Pyrimidine nucleosides	Pyrimidine 2'',3''-dideoxyribonucleosides	0	50.1	Bile secretion	Bile secretion	1.0364	1.0621	0.03011	0.04623	4.5377	4.4674	4.3123	3.8688	3.866	3.7474	3.7374	3.7858	4.0134	3.7414
pos_6082	4-Formylaminoantipyrine	metab_5598	yes	-	pos	-	249.134	4.08397	M+NH4	C12H13N3O2	63.6	0	HMDB0246429	-	-	-	-	-	Organoheterocyclic compounds	Azoles	Pyrazoles	63.6	0	-	-	3.0414	3.019	5.949e-09	9.536e-07	0.5687	0.5659	0.8028	0.587	0.5849	3.0246	2.7517	3.2146	2.8817	2.8759
neg_5113	Niraxostat	metab_12310	yes	-	neg	-	344.125	5.65393	M+FA-H	C16H17N3O3	0	35	HMDB0255624	-	-	-	-	-	Organoheterocyclic compounds	Azoles	Pyrazoles	0	35	-	-	1.2035	1.2053	0.0003696	0.0006798	3.8591	3.8041	3.6039	4.0207	3.6223	3.2972	3.157	3.1759	3.2221	3.4074
pos_1864	3-Aminopyrazin-2-ol	metab_957	yes	-	pos	-	112.051	1.3264	M+H	C4H5N3O	0	35.2	HMDB0245823	-	-	-	-	-	Organoheterocyclic compounds	Diazines	Pyrazines	0	35.2	-	-	1.9585	1.9484	1.004e-05	6.54e-05	4.8013	5.2595	4.6817	4.8469	5.0179	5.9118	5.9074	5.8787	6.0138	5.9235
pos_6207	(R)-Glabridin	metab_5737	yes	C10421	pos	59870-68-7	307.132	3.89062	M+H-H2O	C20H20O4	0	52.8	HMDB0034188	-	-	-	-	-	Phenylpropanoids and polyketides	Isoflavonoids	Pyranoisoflavonoids	0	52.8	-	-	1.0767	1.088	0.002029	0.004567	5.029	4.7716	4.8894	4.6891	4.7828	4.473	4.4686	4.3538	4.6628	4.4808
pos_6654	Phaseollin	metab_7748	yes	C10515	pos	40323-57-7;13401-40-6	364.153	3.20938	M+ACN+H	C20H18O4	0	46.3	HMDB0034411;HMDB0034173	-	-	-	-	-	Phenylpropanoids and polyketides	Isoflavonoids	Pyranoisoflavonoids	0	46.3	-	-	1.0298	1.0195	3.024e-05	0.0001548	5.344	5.2486	5.2372	5.2623	5.2822	5.0188	4.9431	4.9356	5.0847	4.9984
neg_5616	Phaseollinisoflavan	metab_12867	yes	C10515	neg	40323-57-7	323.126	4.89578	M-H	C20H20O4	0	35.7	HMDB0034411	-	-	-	-	-	Phenylpropanoids and polyketides	Isoflavonoids	Pyranoisoflavonoids	0	35.7	-	-	1.4872	1.4826	1.654e-07	1.616e-06	5.0516	4.966	4.9833	4.8839	4.861	4.1985	4.2105	4.1237	4.2941	4.2288
neg_1300	Calanolide A	metab_8091	yes	C09147	neg	142632-32-4	405.145	3.20182	M+Cl	C22H26O5	0	52.6	HMDB0249535	-	-	-	-	-	Phenylpropanoids and polyketides	Coumarins and derivatives	Pyranocoumarins	0	52.6	-	-	1.3336	1.3263	4.023e-06	1.668e-05	6.7456	6.7659	6.5599	6.5283	6.5373	6.0368	6.0056	6.0053	6.0746	6.0091
pos_2113	Oxypurinol	metab_1233	yes	C07599	pos	2465-59-0	153.041	2.79575	M+H	C5H4N4O2	57.5	0	HMDB0000786	-	-	-	-	-	Organoheterocyclic compounds	Imidazopyrimidines	Purines and purine derivatives	57.5	0	-	-	1.067	1.0554	3.335e-07	1.181e-05	5.8785	5.877	5.8461	5.8881	5.9483	5.6135	5.6236	5.6018	5.5871	5.5766
pos_2527	Caffeine	metab_1688	yes	C07481	pos	1958-08-02	195.088	3.67295	M+H	C8H10N4O2	68.8	0	HMDB0001847;PW_C001222	-	-	map01100;map01110;map01120;map00232;map01065;map01060	Metabolism;Metabolism;Metabolism;Metabolism;Metabolism;Metabolism	Global and overview maps;Global and overview maps;Global and overview maps;Biosynthesis of other secondary metabolites;Chemical structure transformation maps;Chemical structure transformation maps	Organoheterocyclic compounds	Imidazopyrimidines	Purines and purine derivatives	68.8	0	Metabolic pathways;Biosynthesis of secondary metabolites;Microbial metabolism in diverse environments;Caffeine metabolism;Biosynthesis of alkaloids derived from histidine and purine;Biosynthesis of plant secondary metabolites	Metabolic pathways;Biosynthesis of secondary metabolites;Microbial metabolism in diverse environments;Caffeine metabolism;Biosynthesis of alkaloids derived from histidine and purine;Biosynthesis of plant secondary metabolites	2.8306	2.8852	0.009064	0.01634	0.8411	2.9488	0.7869	1.6419	1.7375	4.7035	4.7352	4.9485	1.5994	4.9108
pos_3253	9-(4-Fluoro-3-(hydroxymethyl)butyl)guanine	metab_2488	yes	-	pos	-	319.129	5.76348	M+ACN+Na	C10H14FN5O2	0	34.1	HMDB0245591	-	-	-	-	-	Organoheterocyclic compounds	Imidazopyrimidines	Purines and purine derivatives	0	34.1	-	-	1.141	1.1316	0.0007239	0.001907	4.7552	5.0856	4.8029	5.0337	4.8732	5.3229	5.2788	5.1836	5.2783	5.3305
pos_4553	2-Amino-9-[4-hydroxy-2-(hydroxymethyl)butyl]-3H-purin-6-one	metab_3915	yes	-	pos	-	271.154	6.55202	M+NH4	C10H15N5O3	0	36.5	HMDB0244320	-	-	-	-	-	Organoheterocyclic compounds	Imidazopyrimidines	Purines and purine derivatives	0	36.5	-	-	1.9573	1.982	0.02	0.03261	3.8122	3.7408	3.75	3.7696	3.7668	4.3276	5.6734	5.86	3.6795	5.8756
pos_5200	8-Hydroxyguanine	metab_4627	yes	C20155	pos	5614-64-2	352.121	5.86782	2M+NH4	C5H5N5O2	0	41.3	HMDB0002032	-	-	-	-	-	Organoheterocyclic compounds	Imidazopyrimidines	Purines and purine derivatives	0	41.3	-	-	1.4422	1.4252	1.29e-06	2.818e-05	4.434	4.5415	4.4119	4.5535	4.3366	4.993	4.9966	4.9772	4.9921	4.9674
pos_7042	Dihydrozeatin	metab_6660	yes	C02029	pos	23599-75-9;37789-32-5	254.161	2.77185	M+CH3OH+H	C10H15N5O	0	52.1	HMDB0012215;MJDBZSJ0000131	-	-	map01110;map04075;map00908	Metabolism;Environmental Information Processing;Metabolism	Global and overview maps;Signal transduction;Metabolism of terpenoids and polyketides	Organoheterocyclic compounds	Imidazopyrimidines	Purines and purine derivatives	0	52.1	Biosynthesis of secondary metabolites;Plant hormone signal transduction;Zeatin biosynthesis	Biosynthesis of secondary metabolites;Plant hormone signal transduction;Zeatin biosynthesis	2.6772	2.6502	7.583e-09	1.153e-06	4.9131	5.1511	4.8378	4.9566	4.7163	6.717	6.7405	6.7043	6.6746	6.7311
pos_7380	Adenine	metab_7030	yes	C00147	pos	73-24-5	136.062	1.29452	M+H	C5H5N5	67.1	0	PW_C000024;HMDB0000034;MJDBOTE0000759	Nucleic acids	Bases	map01100;map00230;map00908	Metabolism;Metabolism;Metabolism	Global and overview maps;Nucleotide metabolism;Metabolism of terpenoids and polyketides	Organoheterocyclic compounds	Imidazopyrimidines	Purines and purine derivatives	67.1	0	Metabolic pathways;Purine metabolism;Zeatin biosynthesis	Metabolic pathways;Purine metabolism;Zeatin biosynthesis	1.1494	1.1355	0.004224	0.008577	4.1282	3.9048	3.9867	3.8579	3.9908	4.2648	4.437	4.668	4.1212	4.3988
neg_165	Uric Acid	metab_8477	yes	C00366	neg	69-93-2	167.02	1.51028	M-H, 2M-H	C5H4N4O3	92.5	0	HMDB0000289;PW_C000195;MJDBOTE0001097	-	-	map01100;map04976;map00230;map01120	Metabolism;Organismal Systems;Metabolism;Metabolism	Global and overview maps;Digestive system;Nucleotide metabolism;Global and overview maps	Organoheterocyclic compounds	Imidazopyrimidines	Purines and purine derivatives	92.5	0	Metabolic pathways;Bile secretion;Purine metabolism;Microbial metabolism in diverse environments	Metabolic pathways;Bile secretion;Purine metabolism;Microbial metabolism in diverse environments	1.032	1.0312	2.651e-06	1.194e-05	8.3245	8.1842	8.2827	8.182	8.1994	7.8843	7.8638	7.8405	7.9051	7.8689
neg_1770	Desciclovir	metab_8611	yes	-	neg	-	463.184	3.75317	2M+FA-H	C8H11N5O2	0	55.4	HMDB0251033	-	-	-	-	-	Organoheterocyclic compounds	Imidazopyrimidines	Purines and purine derivatives	0	55.4	-	-	1.2522	1.2467	3.407e-06	1.451e-05	5.7272	5.5722	5.5747	5.4727	5.5771	5.0081	5.0427	5.0226	5.1409	5.0624
pos_3222	Nicotine glucuronide	metab_2455	yes	-	pos	152306-59-7	303.134	5.67548	M+H-2H2O	C16H22N2O6	0	48.5	PW_C000985;HMDB0001272	-	-	-	-	-	Nucleosides, nucleotides, and analogues	Purine nucleotides	Purine ribonucleotides	0	48.5	-	-	1.0707	1.062	0.001266	0.003052	4.0662	3.9079	4.0586	4.2958	4.1178	4.3808	4.5196	4.4533	4.3673	4.3894
neg_1479	O6-Carboxymethyl-2'-deoxy-guanosine	metab_8288	yes	-	neg	-	324.094	3.40662	M-H	C12H15N5O6	0	50.8	HMDB0255879	-	-	-	-	-	Nucleosides, nucleotides, and analogues	Purine nucleosides	Purine 2''-deoxyribonucleosides	0	50.8	-	-	1.1802	1.1765	5.748e-06	2.21e-05	4.5811	4.8001	4.6515	4.7134	4.7235	5.1977	5.2164	5.1207	5.0909	5.2122
pos_6187	Inosine,2',3'-dideoxy-	metab_5714	yes	-	pos	-	259.082	3.92263	M+Na	C10H12N4O3	0	54.3	HMDB0253491	-	-	-	-	-	Nucleosides, nucleotides, and analogues	Purine nucleosides	Purine 2'',3''-dideoxyribonucleosides	0	54.3	-	-	1.2568	1.2518	0.0001487	0.0005331	3.9082	3.8839	4.0882	4.1126	4.1983	4.4879	4.5436	4.4351	4.4296	4.4616
pos_2249	Levomefolic acid	metab_1381	yes	C00440	pos	134-35-0	424.171	3.05703	M+H-2H2O	C20H25N7O6	0	35.5	HMDB0254053;HMDB0001396	-	-	map01100;map01200;map01120;map00720;map01523;map00670	Metabolism;Metabolism;Metabolism;Metabolism;Human Diseases;Metabolism	Global and overview maps;Global and overview maps;Global and overview maps;Energy metabolism;Drug resistance: antineoplastic;Metabolism of cofactors and vitamins	Organoheterocyclic compounds	Pteridines and derivatives	Pterins and derivatives	0	35.5	Metabolic pathways;Carbon metabolism;Microbial metabolism in diverse environments;Carbon fixation pathways in prokaryotes;Antifolate resistance;One carbon pool by folate	Metabolic pathways;Carbon metabolism;Microbial metabolism in diverse environments;Carbon fixation pathways in prokaryotes;Antifolate resistance;One carbon pool by folate	1.0716	1.0673	0.000208	0.0006926	5.767	5.5726	5.6358	5.5551	5.6416	5.2799	5.3002	5.2734	5.4455	5.3063
pos_2389	6-Lactoyltetrahydropterin	metab_1534	yes	C04244	pos	33405-80-0	479.214	3.36037	2M+H	C9H13N5O3	0	30.3	PW_C001388;HMDB0002065	-	-	map01100;map00790	Metabolism;Metabolism	Global and overview maps;Metabolism of cofactors and vitamins	Organoheterocyclic compounds	Pteridines and derivatives	Pterins and derivatives	0	30.3	Metabolic pathways;Folate biosynthesis	Metabolic pathways;Folate biosynthesis	1.1168	1.1087	0.0004104	0.001204	5.433	5.7764	5.6103	5.6768	5.6344	5.9359	6.0132	5.928	6.0407	5.9569
pos_6718	Neopterin	metab_6301	yes	C05926	pos	10162-32-0;2009-64-5;2277-42-1	276.069	3.12118	M+Na	C9H11N5O4	0	37.5	HMDB0000727;HMDB0000845;PW_C000673;HMDB0000877	-	-	map00790	Metabolism	Metabolism of cofactors and vitamins	Organoheterocyclic compounds	Pteridines and derivatives	Pterins and derivatives	0	37.5	Folate biosynthesis	Folate biosynthesis	1.6152	1.599	0.0006969	0.001848	4.1771	3.6563	4.1621	4.1185	4.1793	3.5368	3.5633	3.1518	3.1466	3.2105
neg_1278	Biopterin	metab_8065	yes	C06313	neg	13039-82-2;13039-62-8;22150-76-1	282.084	3.13848	M+FA-H	C9H11N5O3	0	36.6	HMDB0000633;HMDB0000817;HMDB0000468;MJDBOTE0001160	-	-	map01100;map00790;map01240	Metabolism;Metabolism;Metabolism	Global and overview maps;Metabolism of cofactors and vitamins;Global and overview maps	Organoheterocyclic compounds	Pteridines and derivatives	Pterins and derivatives	0	36.6	Metabolic pathways;Folate biosynthesis;Biosynthesis of cofactors	Metabolic pathways;Folate biosynthesis;Biosynthesis of cofactors	1.7511	1.7579	3.63e-05	9.484e-05	5.0888	5.5045	4.918	5.0592	5.413	6.1245	6.249	6.5408	6.2287	6.2443
pos_3618	17-hydroxyprogesterone caproate	metab_2885	yes	-	pos	-	483.248	6.68705	M+K	C27H40O5	0	31.3	HMDB0244774	-	-	-	-	-	Lipids and lipid-like molecules	Steroids and steroid derivatives	Pregnane steroids	0	31.3	-	-	1.0487	1.0394	8.371e-06	5.713e-05	6.3871	6.4206	6.3377	6.316	6.3077	6.0804	6.0891	6.0516	6.1125	6.004
pos_6414	Difluprednate	metab_5967	yes	C12695	pos	23674-86-4	550.262	3.5606	M+ACN+H	C27H34F2O7	0	49.8	HMDB0015676	-	-	-	-	-	Lipids and lipid-like molecules	Steroids and steroid derivatives	Pregnane steroids	0	49.8	-	-	1.0603	1.0554	0.0001387	0.0005062	5.1921	5.3918	5.3133	5.4406	5.4045	5.6537	5.6762	5.6219	5.6628	5.6635
pos_6599	Diflucortolone valerate	metab_6169	yes	-	pos	-	511.291	3.28113	M+CH3OH+H	C27H36F2O5	0	34.6	HMDB0251261	-	-	-	-	-	Lipids and lipid-like molecules	Steroids and steroid derivatives	Pregnane steroids	0	34.6	-	-	1.7768	1.7634	6.817e-05	0.0002919	5.0973	4.9042	5.0624	4.7367	4.9893	4.1426	3.9743	3.8604	4.3892	4.2053
pos_3412	Epipregnanolone	metab_7715	yes	C15484;C11825	pos	516-55-2;128-21-2	341.247	6.08332	M+Na	C21H34O2	0	47.6	HMDB0001471;HMDB0245902;LMST02030185;HMDB0001455	-	-	-	-	-	Lipids and lipid-like molecules	Steroids and steroid derivatives	Pregnane steroids	0	47.6	-	-	1.0476	1.0353	0.001803	0.004119	4.6685	4.8364	4.6886	4.481	4.6991	4.3443	4.3807	4.3018	4.4937	4.2536
pos_162	1-Tert-Butyl 4-ethyl 3-oxopiperidine-1,4-dicarboxylate	metab_689	yes	-	pos	-	272.149	5.33777	M+H, M+Na, M+H-H2O	C13H21NO5	0	31.9	HMDB0247311	-	-	-	-	-	Organoheterocyclic compounds	Piperidines	Piperidinecarboxylic acids and derivatives	0	31.9	-	-	2.9735	2.9382	0.0002535	0.0008114	0.0054	1.8493	0.0055	1.0555	0.0057	2.825	3.2762	2.7776	2.9525	3.161
pos_7142	4-Amino-1-piperidinecarboxylic acid	metab_6771	yes	C16837	pos	959317-82-9	289.187	2.61212	2M+H	C6H12N2O2	0	42.9	HMDB0060385	-	-	-	-	-	Organoheterocyclic compounds	Piperidines	Piperidinecarboxylic acids and derivatives	0	42.9	-	-	1.7025	1.6907	4.779e-08	3.634e-06	5.5081	5.4298	5.4338	5.4402	5.4251	4.7939	4.7401	4.7707	4.6262	4.6415
neg_2423	Cenisertib	metab_9333	yes	-	neg	-	472.224	4.76547	M+Na-2H	C24H30FN7O	0	38.9	HMDB0249799	-	-	-	-	-	Organoheterocyclic compounds	Diazinanes	Piperazines	0	38.9	-	-	1.4361	1.4299	4.163e-07	2.811e-06	5.7397	5.5968	5.6836	5.6274	5.591	4.8878	4.9589	4.8965	5.0934	4.9577
neg_5608	Selpercatinib	metab_12858	yes	-	neg	-	506.235	4.90363	M-H2O-H	C29H31N7O3	0	42.9	HMDB0304865	-	-	-	-	-	Organoheterocyclic compounds	Diazinanes	Piperazines	0	42.9	-	-	1.2283	1.2312	0.0001657	0.000337	5.4624	5.2644	5.3667	5.1376	5.1474	4.5879	4.7518	4.6739	4.9036	4.758
pos_4488	LysoSM(d18:1)	metab_3842	yes	C03640	pos	1670-26-4	430.332	6.64738	M+H-2H2O	C23H50N2O5P+	0	37.1	HMDB0006482	-	-	map00600	Metabolism	Lipid metabolism	Lipids and lipid-like molecules	Sphingolipids	Phosphosphingolipids	0	37.1	Sphingolipid metabolism	Sphingolipid metabolism	1.8911	1.8635	4.369e-05	0.0002035	5.3214	5.1064	5.3941	5.5336	5.8091	4.4974	4.4874	4.4811	4.5288	4.4915
pos_5212	Sphinganine 1-phosphate	metab_4639	yes	C01120	pos	19794-97-9	420.228	5.84395	M+K	C18H40NO5P	0	54.9	PW_C001070;HMDB0242462;HMDB0001383	-	-	map00600;map01100;map04080	Metabolism;Metabolism;Environmental Information Processing	Lipid metabolism;Global and overview maps;Signaling molecules and interaction	Lipids and lipid-like molecules	Sphingolipids	Phosphosphingolipids	0	54.9	Sphingolipid metabolism;Metabolic pathways;Neuroactive ligand-receptor interaction	Sphingolipid metabolism;Metabolic pathways;Neuroactive ligand-receptor interaction	1.9094	1.8851	2.007e-05	0.000112	3.342	3.5492	3.5482	3.2115	3.2914	4.3118	4.36	4.0875	4.3232	4.5994
pos_5367	2beta-Hydroxytestosterone	metab_4809	yes	C00550	pos	10390-14-4	349.175	5.53112	M+2Na-H	C19H28O3	0	67.9	HMDB0012654	Lipids	Phospholipids	map00600;map01100;map04071;map04217	Metabolism;Metabolism;Environmental Information Processing;Cellular Processes	Lipid metabolism;Global and overview maps;Signal transduction;Cell growth and death	Lipids and lipid-like molecules	Sphingolipids	Phosphosphingolipids	0	67.9	Sphingolipid metabolism;Metabolic pathways;Sphingolipid signaling pathway;Necroptosis	Sphingolipid metabolism;Metabolic pathways;Sphingolipid signaling pathway;Necroptosis	1.7045	1.7146	0.01145	0.02006	2.111	2.1071	2.1162	2.1356	2.1329	2.9715	3.6752	3.0629	2.0462	3.571
neg_3391	Sphingosine 1-phosphate	metab_10403	yes	C06124	neg	26993-30-6	424.247	6.42952	M+FA-H	C18H38NO5P	0	31.1	PW_C000188;HMDB0000277	-	-	map01100;map04666;map05152;map00600;map04080;map04020;map04371;map04072;map04071	Metabolism;Organismal Systems;Human Diseases;Metabolism;Environmental Information Processing;Environmental Information Processing;Environmental Information Processing;Environmental Information Processing;Environmental Information Processing	Global and overview maps;Immune system;Infectious disease: bacterial;Lipid metabolism;Signaling molecules and interaction;Signal transduction;Signal transduction;Signal transduction;Signal transduction	Lipids and lipid-like molecules	Sphingolipids	Phosphosphingolipids	0	31.1	Metabolic pathways;Fc gamma R-mediated phagocytosis;Tuberculosis;Sphingolipid metabolism;Neuroactive ligand-receptor interaction;Calcium signaling pathway;Apelin signaling pathway;Phospholipase D signaling pathway;Sphingolipid signaling pathway	Metabolic pathways;Fc gamma R-mediated phagocytosis;Tuberculosis;Sphingolipid metabolism;Neuroactive ligand-receptor interaction;Calcium signaling pathway;Apelin signaling pathway;Phospholipase D signaling pathway;Sphingolipid signaling pathway	1.9087	1.9521	0.0227	0.02986	5.0089	5.0242	4.6974	2.5855	4.4205	2.3043	2.3193	2.3381	4.1861	2.314
pos_6982	Diisopropylphosphate	metab_6592	yes	C03113	pos	-	365.148	2.79575	2M+H	C6H15O4P	0	31.8	HMDB0251359	-	-	-	-	-	Organic acids and derivatives	Organic phosphoric acids and derivatives	Phosphate esters	0	31.8	-	-	1.3497	1.3366	2.78e-06	4.363e-05	5.2269	5.1566	5.0614	5.0544	5.1725	4.6938	4.7182	4.5882	4.6449	4.6858
neg_7360	Diethyl Hydrogen Phosphate	metab_14793	yes	C06608	neg	598-02-7	199.037	0.993033	M+FA-H	C4H11O4P	36.7	0	HMDB0012209	-	-	map00627	Metabolism	Xenobiotics biodegradation and metabolism	Organic acids and derivatives	Organic phosphoric acids and derivatives	Phosphate esters	36.7	0	Aminobenzoate degradation	Aminobenzoate degradation	1.3726	1.3599	2.554e-06	1.159e-05	6.8794	6.8102	6.8884	6.915	6.9875	6.2172	6.2341	6.1879	6.4434	6.2492
neg_2400	2-Hydroxy-3-(4-hydroxyphenyl)propenoic acid	metab_9308	yes	C05350	neg	-	225.04	4.71673	M+FA-H	C9H8O4	0	31.4	HMDB0006915;PW_C003007	-	-	map01100;map00350	Metabolism;Metabolism	Global and overview maps;Amino acid metabolism	Benzenoids	Benzene and substituted derivatives	Phenylpyruvic acid derivatives	0	31.4	Metabolic pathways;Tyrosine metabolism	Metabolic pathways;Tyrosine metabolism	1.068	1.0609	0.004728	0.00689	3.2142	3.2001	3.5918	3.3409	3.8087	2.9393	2.9544	2.9733	3.0195	2.976
neg_2758	Phenylpyruvic Acid	metab_9703	yes	C00166	neg	156-06-9	163.039	5.3423	M-H	C9H8O3	82.8	0	PW_C000131;HMDB0304081;HMDB0000205;MJDBOTE0000608	-	-	map01100;map01110;map01210;map00960;map01230;map00360;map00400;map01060	Metabolism;Metabolism;Metabolism;Metabolism;Metabolism;Metabolism;Metabolism;Metabolism	Global and overview maps;Global and overview maps;Global and overview maps;Biosynthesis of other secondary metabolites;Global and overview maps;Amino acid metabolism;Amino acid metabolism;Chemical structure transformation maps	Benzenoids	Benzene and substituted derivatives	Phenylpyruvic acid derivatives	82.8	0	Metabolic pathways;Biosynthesis of secondary metabolites;2-Oxocarboxylic acid metabolism;Tropane, piperidine and pyridine alkaloid biosynthesis;Biosynthesis of amino acids;Phenylalanine metabolism;Phenylalanine, tyrosine and tryptophan biosynthesis;Biosynthesis of plant secondary metabolites	Metabolic pathways;Biosynthesis of secondary metabolites;2-Oxocarboxylic acid metabolism;Tropane, piperidine and pyridine alkaloid biosynthesis;Biosynthesis of amino acids;Phenylalanine metabolism;Phenylalanine, tyrosine and tryptophan biosynthesis;Biosynthesis of plant secondary metabolites	1.0702	1.0618	2.64e-05	7.335e-05	5.5662	5.6119	5.5908	5.595	5.7784	5.1972	5.33	5.236	5.234	5.1901
neg_575	Probucol	metab_13014	yes	C07373	neg	23288-49-5	515.305	6.28915	M-H, M+Cl	C31H48O2S2	0	33	HMDB0015537	-	-	-	-	-	Benzenoids	Benzene and substituted derivatives	Phenylpropanes	0	33	-	-	1.4097	1.4003	7.294e-07	4.424e-06	6.6806	6.8284	6.5628	6.6252	6.6768	6.0284	5.9657	5.9699	6.0458	6.0561
pos_3214	Ketobemidone	metab_2446	yes	C11792	pos	469-79-4	280.191	5.6435	M+CH3OH+H	C15H21NO2	0	44.8	PW_C022668;HMDB0041913	-	-	-	-	-	Organoheterocyclic compounds	Piperidines	Phenylpiperidines	0	44.8	-	-	1.5913	1.5803	3.659e-05	0.0001783	3.8373	3.7902	3.3991	3.7201	3.5529	4.3233	4.3246	4.3121	4.3642	4.3206
pos_5593	Glutethimide	metab_5057	yes	C07489	pos	77-21-4	250.144	5.06575	M+CH3OH+H	C13H15NO2	0	45.2	HMDB0015505	-	-	-	-	-	Organoheterocyclic compounds	Piperidines	Phenylpiperidines	0	45.2	-	-	1.3611	1.3531	5.011e-05	0.0002285	3.9084	4.1013	3.8171	4.1494	4.0457	4.5254	4.5336	4.4869	4.4616	4.4942
neg_4757	Hydroxyrepaglinide	metab_11914	yes	-	neg	-	503.232	6.00183	M+Cl	C27H36N2O5	0	32.3	HMDB0060979	-	-	-	-	-	Organoheterocyclic compounds	Piperidines	Phenylpiperidines	0	32.3	-	-	2.1881	2.1722	2.147e-08	1.037e-06	6.4311	6.3808	6.4015	6.3642	6.4202	4.6921	4.7639	4.8728	5.0814	4.7109
neg_6112	Repaglinide	metab_13417	yes	C07670	neg	135062-02-1	489.22	4.17083	M+K-2H	C27H36N2O4	0	59.2	PW_C009360;HMDB0015048;MJDBOTE0001384	-	-	-	-	-	Organoheterocyclic compounds	Piperidines	Phenylpiperidines	0	59.2	-	-	1.0126	1.0055	4.781e-05	0.0001184	5.3148	5.4511	5.2923	5.367	5.2986	4.9968	4.9767	4.8708	5.0701	5.0344
neg_6113	4-(4-Fluorophenyl)piperidin-4-ol	metab_13418	yes	-	neg	-	435.209	4.17083	2M+FA-H	C11H14FNO	0	50.1	HMDB0246291	-	-	-	-	-	Organoheterocyclic compounds	Piperidines	Phenylpiperidines	0	50.1	-	-	2.1689	2.1647	8.269e-06	2.923e-05	5.3787	5.1569	5.0321	4.4723	4.7266	3.3146	3.3297	3.3486	3.3948	3.3244
pos_2746	2-Hydroxynevirapine	metab_1928	yes	C16608	pos	-	300.147	4.23732	M+NH4	C15H14N4O2	0	62.1	PW_C008647;HMDB0013912	-	-	map00982	Metabolism	Xenobiotics biodegradation and metabolism	Benzenoids	Benzene and substituted derivatives	Phenylbutylamines	0	62.1	Drug metabolism - cytochrome P450	Drug metabolism - cytochrome P450	1.7183	1.7017	0.03264	0.04939	3.7759	3.5995	3.4969	2.2747	3.4797	3.3851	2.5496	1.7094	1.7562	1.772
neg_2020	Diethylenetriamine crosslinked with epichlorohydrin	metab_8890	yes	-	neg	25085-17-0	569.294	4.08403	2M+Hac-H	C14H22ClNO	0	32.1	HMDB0032216	-	-	-	-	-	Benzenoids	Benzene and substituted derivatives	Phenylbutylamines	0	32.1	-	-	1.2602	1.2531	3.681e-07	2.559e-06	6.6508	6.6477	6.5414	6.5077	6.5143	6.0444	6.0365	6.0308	6.0968	6.0091
neg_3206	Gallopamil	metab_10199	yes	C13764	neg	16662-47-8	1013.58	6.0561	2M+FA-H	C28H40N2O5	0	80.5	HMDB0252599	-	-	-	-	-	Benzenoids	Benzene and substituted derivatives	Phenylbutylamines	0	80.5	-	-	1.1497	1.1451	0.000104	0.0002274	6.1574	6.3578	6.5085	6.4623	6.4624	6.7988	6.8654	6.8943	6.8271	6.8949
neg_1634	Acetophenazine	metab_8460	yes	C06807	neg	2751-68-0	446.168	3.58013	M+Cl	C23H29N3O2S	0	59.3	HMDB0015196	-	-	-	-	-	Organoheterocyclic compounds	Benzothiazines	Phenothiazines	0	59.3	-	-	1.4445	1.4351	2.02e-06	9.701e-06	5.8524	5.7146	5.7715	5.6529	5.7687	4.9588	4.9654	5.1185	5.2041	5.0183
neg_7009	Dixyrazine	metab_14408	yes	-	neg	-	448.205	3.26505	M+Na-2H	C24H33N3O2S	0	37.7	HMDB0251503	-	-	-	-	-	Organoheterocyclic compounds	Benzothiazines	Phenothiazines	0	37.7	-	-	1.3097	1.304	1.983e-07	1.616e-06	6.3481	6.205	6.2989	6.2723	6.2974	5.6436	5.7055	5.6735	5.7846	5.7579
pos_5268	Tamsulosin	metab_4700	yes	C07124	pos	106133-20-4	426.207	5.74748	M+NH4	C20H28N2O5S	0	43.9	HMDB0014844;HMDB0259951	-	-	-	-	-	Benzenoids	Benzene and substituted derivatives	Phenethylamines	0	43.9	-	-	2.3049	2.2781	0.0002235	0.000733	5.0492	4.9325	4.9577	4.7365	4.9283	4.3012	2.9605	3.3819	3.4278	3.2859
pos_1125	16-alpha-Hydroxyandrosterone	metab_141	yes	C14519	pos	-	307.226	6.58388	M+H, 2M+ACN+H	C19H30O3	0	45.1	HMDB0013156	-	-	map00624;map01120	Metabolism;Metabolism	Xenobiotics biodegradation and metabolism;Global and overview maps	Benzenoids	Phenanthrenes and derivatives	Phenanthrols	0	45.1	Polycyclic aromatic hydrocarbon degradation;Microbial metabolism in diverse environments	Polycyclic aromatic hydrocarbon degradation;Microbial metabolism in diverse environments	1.0155	1.0355	0.04282	0.06244	5.0599	4.9415	4.7844	4.8638	4.7797	4.8443	4.5003	3.9974	4.7893	4.3136
neg_5096	Zaragozic acid A	metab_12290	yes	-	neg	-	671.276	5.67743	M-H2O-H	C35H46O14	0	65.3	HMDB0259988;LMPK00000001	-	-	-	-	-	Organic acids and derivatives	Carboxylic acids and derivatives	Pentacarboxylic acids and derivatives	0	65.3	-	-	1.8911	1.9066	8.583e-05	0.0001941	5.233	4.8514	5.1682	5.0467	4.5282	3.5313	3.6074	3.5836	3.5001	4.1641
pos_3485	Lilopristone	metab_2741	yes	-	pos	-	480.314	6.24985	M+CH3OH+H	C29H37NO3	0	60.7	HMDB0254091	-	-	-	-	-	Lipids and lipid-like molecules	Steroids and steroid derivatives	Oxosteroids	0	60.7	-	-	1.1248	1.1159	9.085e-05	0.0003626	6.0516	6.0895	6.1433	6.178	6.1553	5.8081	5.8798	5.635	5.8223	5.7763
pos_4796	Aglepristone	metab_4180	yes	-	pos	-	464.319	6.24203	M+CH3OH+H	C29H37NO2	0	51.8	HMDB0248061	-	-	-	-	-	Lipids and lipid-like molecules	Steroids and steroid derivatives	Oxosteroids	0	51.8	-	-	1.91	1.8983	0.0005122	0.001436	5.3755	5.9006	4.9984	5.1074	5.0901	4.4588	4.1267	4.4667	4.213	4.0923
neg_4729	N-Demethyl Mifepristone	metab_11883	yes	-	neg	-	452.196	6.0272	M+K-2H	C28H33NO2	0	53	HMDB0255109	-	-	-	-	-	Lipids and lipid-like molecules	Steroids and steroid derivatives	Oxosteroids	0	53	-	-	1.7713	1.7843	0.001398	0.002244	3.5064	3.1504	3.3745	3.435	2.1211	1.865	1.8799	1.8986	1.9442	1.8747
neg_5835	Estrone-3,4-quinone	metab_13109	yes	-	neg	633-34-1	305.118	4.55177	M+Na-2H	C18H20O3	0	58.1	HMDB0012942	-	-	-	-	-	Lipids and lipid-like molecules	Steroids and steroid derivatives	Oxosteroids	0	58.1	-	-	1.0827	1.0888	0.0003143	0.0005893	5.2342	5.0226	5.1371	4.9235	4.9343	4.5191	4.5787	4.6163	4.748	4.6505
neg_2407	(3a,5b,7a,12a)-24-[(carboxymethyl)amino]-1,12-dihydroxy-24-oxocholan-3-yl-b-D-Glucopyranosiduronic acid	metab_9315	yes	-	neg	99794-78-2	640.331	4.73097	M-H	C32H51NO12	0	42.6	HMDB0002472	-	-	-	-	-	Organic nitrogen compounds	Organonitrogen compounds	Oximes	0	42.6	-	-	1.1889	1.1833	3.712e-05	9.663e-05	6.3599	6.1307	6.4045	6.4056	6.402	5.7899	5.8344	5.8174	5.9518	5.8569
pos_3363	Sulfonamidoethanol	metab_2608	yes	-	pos	-	126.022	6.0035	M+H	C2H7NO3S	0	47.2	HMDB0258596	-	-	-	-	-	Organic acids and derivatives	Organic sulfonic acids and derivatives	Organosulfonic acids and derivatives	0	47.2	-	-	1.0162	1.0094	4.676e-05	0.0002138	5.4798	5.3984	5.5548	5.5649	5.5651	5.8153	5.7725	5.8006	5.75	5.8019
pos_3176	N-Nitroso(2-hydroxypropyl)(2-oxopropyl)amine	metab_2404	yes	-	pos	-	338.204	5.51512	2M+NH4	C6H12N2O3	0	33.8	HMDB0253217	-	-	-	-	-	Organic nitrogen compounds	Organonitrogen compounds	Organic nitroso compounds	0	33.8	-	-	1.3498	1.3389	1.307e-05	8.042e-05	4.6825	4.643	4.5438	4.5628	4.5478	4.0495	4.2284	4.192	4.1242	4.0052
pos_3159	2,7-dihydroxy-4'-methoxyisoflavanone	metab_2385	yes	C16190	pos	-	304.118	5.45047	M+NH4	C16H14O5	0	36.4	HMDB0304048	-	-	map00943	Metabolism	Biosynthesis of other secondary metabolites	Phenylpropanoids and polyketides	Isoflavonoids	O-methylated isoflavonoids	0	36.4	Isoflavonoid biosynthesis	Isoflavonoid biosynthesis	1.7195	1.7001	1.568e-05	9.253e-05	2.9164	3.069	2.9217	3.2026	2.9385	3.7899	3.9881	3.5973	3.7447	3.7836
neg_2491	Sativan	metab_9408	yes	C10526	neg	41743-86-6	331.119	4.89578	M+FA-H	C17H18O4	0	56.6	HMDB0030521	-	-	-	-	-	Phenylpropanoids and polyketides	Isoflavonoids	O-methylated isoflavonoids	0	56.6	-	-	1.0097	1.0085	1.31e-06	7.005e-06	4.5513	4.5891	4.6118	4.5993	4.4977	4.1843	4.2006	4.2095	4.2631	4.2696
neg_5820	Licoricone	metab_13093	yes	C17765	neg	51847-92-8	363.12	4.57482	M-H2O-H	C22H22O6	0	54.2	LMPK12050069;HMDB0029515	-	-	-	-	-	Phenylpropanoids and polyketides	Isoflavonoids	O-methylated isoflavonoids	0	54.2	-	-	1.0228	1.0191	0.0005006	0.0008935	4.1746	4.2422	4.4037	4.5624	4.3665	4.715	4.7036	4.7508	4.7309	4.7675
pos_5130	Lucidenic acid N	metab_4549	yes	-	pos	364622-33-3	443.276	5.94782	M+H-H2O	C27H40O6	0	72.3	HMDB0038352	-	-	-	-	-	Phenylpropanoids and polyketides	Flavonoids	O-methylated flavonoids	0	72.3	-	-	1.1581	1.1975	0.0251	0.03958	2.9045	3.2708	3.6054	3.8072	2.9265	2.808	2.798	2.7917	2.8393	2.8021
pos_5306	Isosakuranetin	metab_4742	yes	C05334	pos	480-43-3	304.118	5.67548	M+NH4	C16H14O5	0	53	HMDB0253690;LMPK12140355;MJDBOTE0001315	-	-	map00941;map01110	Metabolism;Metabolism	Biosynthesis of other secondary metabolites;Global and overview maps	Phenylpropanoids and polyketides	Flavonoids	O-methylated flavonoids	0	53	Flavonoid biosynthesis;Biosynthesis of secondary metabolites	Flavonoid biosynthesis;Biosynthesis of secondary metabolites	1.2038	1.1842	0.0004891	0.001384	3.8414	3.8435	3.9192	4.0876	3.7481	4.2106	4.4497	4.2589	4.2336	4.2849
pos_5378	5,7-Dihydroxy-3-methoxyflavone	metab_4821	yes	C11577	pos	6665-74-3	302.102	5.49047	M+NH4	C16H12O5	0	46.3	HMDB0029522;LMPK12111654	-	-	-	-	-	Phenylpropanoids and polyketides	Flavonoids	O-methylated flavonoids	0	46.3	-	-	1.2342	1.2203	0.0001031	0.0003994	4.8304	5.0243	4.9246	5.1428	4.8811	5.4045	5.4005	5.3271	5.3472	5.3653
neg_5933	(4-Ethoxyphenyl)urea	metab_13218	yes	C19415	neg	150-69-6	419.194	4.4144	2M+Hac-H	C9H12N2O2	0	40.7	HMDB0032565	-	-	-	-	-	Benzenoids	Benzene and substituted derivatives	N-phenylureas	0	40.7	-	-	1.0346	1.0333	2.354e-06	1.085e-05	5.4072	5.306	5.3762	5.2946	5.2577	4.9369	4.978	4.988	4.9939	4.9287
pos_1002	DG(18:0/0:0/18:2(10E,12Z)+=O(9))	metab_5	yes	-	pos	-	657.506	7.31478	M+NH4, M+Na	C39H70O6	0	44.7	HMDB0295917	-	-	-	-	-	Not Available	Not Available	Not Available	0	44.7	-	-	1.2341	1.222	3.534e-05	0.000174	6.1529	6.2748	6.1176	6.0101	6.1377	5.7925	5.6649	5.7888	5.7302	5.7077
pos_1130	Filipin II	metab_147	yes	-	pos	-	661.392	6.55998	M+NH4, M+Na	C35H58O10	0	75.8	HMDB0242297;HMDB0252258	-	-	-	-	-	Phenylpropanoids and polyketides	Macrolides and analogues	Not Available	0	75.8	-	-	1.2067	1.1926	6.056e-06	4.391e-05	6.1558	6.1496	6.2302	6.2761	6.2835	5.9147	5.8512	5.8129	5.8566	5.7887
pos_183	3-Methyluridine	metab_919	yes	-	pos	2140-69-4	259.092	1.916	M+H, M+Na, M+H-H2O	C10H14N2O6	0	53.2	HMDB0004813	-	-	-	-	-	Nucleosides, nucleotides, and analogues	Pyrimidine nucleosides	Not Available	0	53.2	-	-	2.4041	2.3821	0.001088	0.002684	3.0422	4.846	4.5183	4.6779	3.8597	5.8442	5.8028	5.8468	5.8162	5.8973
pos_1935	Trimethaphan	metab_1035	yes	C07174	pos	7187-66-8	383.203	1.78957	M+NH4	C22H25N2OS+	0	34.7	HMDB0015248	-	-	-	-	-	Organoheterocyclic compounds	Thienoimidazolidines	Not Available	0	34.7	-	-	1.4435	1.4335	0.0001378	0.0005034	5.6565	5.5784	5.556	5.4474	5.5149	5.0679	4.7746	4.8918	5.2165	4.9845
pos_1937	5'-Deoxy-5-fluorouridine	metab_1037	yes	C12739	pos	3094-09-05	279.101	1.80538	M+CH3OH+H	C9H11FN2O5	0	45.1	PW_C040484;HMDB0060406	-	-	map00983	Metabolism	Xenobiotics biodegradation and metabolism	Nucleosides, nucleotides, and analogues	5''-deoxyribonucleosides	Not Available	0	45.1	Drug metabolism - other enzymes	Drug metabolism - other enzymes	1.0142	1.0061	0.0004202	0.001225	6.2768	6.3308	6.2075	6.2058	6.188	5.9311	5.9499	5.9073	6.1147	5.8757
pos_1953	Lappaol A	metab_1055	yes	C17684	pos	62333-08-8	501.194	1.90027	M+H-2H2O	C30H32O9	0	38.8	HMDB0301812	-	-	-	-	-	Phenylpropanoids and polyketides	2-arylbenzofuran flavonoids	Not Available	0	38.8	-	-	1.0196	0.9979	0.03075	0.04703	4.8842	5.4209	5.2281	5.3658	4.7958	5.4874	5.406	5.403	5.7614	5.5053
pos_1998	Acetyllycopsamine	metab_1104	yes	C16751	pos	73544-48-6	405.198	2.52433	M+ACN+Na	C17H27NO6	0	31.9	HMDB0302357	-	-	-	-	-	Alkaloids and derivatives	Not Available	Not Available	0	31.9	-	-	1.3739	1.3606	4.476e-08	3.493e-06	6.329	6.2544	6.3164	6.2647	6.2963	5.8042	5.7793	5.7841	5.8864	5.8226
pos_2066	Exaprolol	metab_1180	yes	-	pos	-	314.207	2.70817	M+Na	C18H29NO2	0	34.4	HMDB0252141	-	-	-	-	-	Benzenoids	Phenol ethers	Not Available	0	34.4	-	-	1.1291	1.1642	0.01261	0.02183	4.1722	4.1946	4.2326	4.2882	4.3726	3.9698	3.969	4.1096	3.3942	3.706
pos_2074	PA(16:1(9Z)/5-iso PGF2VI)	metab_1189	yes	-	pos	-	381.2	2.72415	M+2Na	C37H65O11P	0	46.9	HMDB0263414	-	-	-	-	-	Not Available	Not Available	Not Available	0	46.9	-	-	1.2163	1.211	0.006438	0.01218	5.0325	5.2384	5.1481	5.27	5.2792	4.3164	4.6062	4.9109	4.9217	4.8872
pos_2155	MG(0:0/5-iso PGF2VI/0:0)	metab_1278	yes	-	pos	-	442.277	2.87382	M+ACN+H	C21H36O7	0	38.1	HMDB0260537	-	-	-	-	-	Not Available	Not Available	Not Available	0	38.1	-	-	1.4977	1.4836	0.0004222	0.001227	5.5995	5.4717	5.5709	5.3246	5.4181	4.8154	4.7786	5.0885	5.0337	4.5572
pos_2349	PE(PGE1/DiMe(13,5))	metab_1491	yes	-	pos	-	467.795	3.25738	M+H+Na	C49H86NO12P	0	49.4	HMDB0284951	-	-	-	-	-	Not Available	Not Available	Not Available	0	49.4	-	-	2.1532	2.1316	2.685e-05	0.0001418	5.7617	5.4909	5.6162	5.5098	5.6466	4.3001	4.0431	4.2859	4.8513	4.4571
pos_2450	Avemectin B1	metab_1603	yes	-	pos	-	444.259	3.5041	M+2H	C49H74O14	0	51.2	HMDB0254790	-	-	-	-	-	Phenylpropanoids and polyketides	Macrolides and analogues	Not Available	0	51.2	-	-	1.1482	1.146	0.0004228	0.001227	5.4196	5.3652	5.5785	5.6277	5.7064	5.9231	5.9096	5.88	5.9118	5.9357
pos_2474	Avermectin A1a	metab_1629	yes	C11984	pos	65195-51-9	444.259	3.5606	M+2H	C49H74O14	0	56.7	HMDB0242563;LMPK04000025	-	-	map01052;map01100;map00522;map01110	Metabolism;Metabolism;Metabolism;Metabolism	Metabolism of terpenoids and polyketides;Global and overview maps;Metabolism of terpenoids and polyketides;Global and overview maps	Phenylpropanoids and polyketides	Macrolides and analogues	Not Available	0	56.7	Type I polyketide structures;Metabolic pathways;Biosynthesis of 12-, 14- and 16-membered macrolides;Biosynthesis of secondary metabolites	Type I polyketide structures;Metabolic pathways;Biosynthesis of 12-, 14- and 16-membered macrolides;Biosynthesis of secondary metabolites	2.3479	2.3272	8.832e-05	0.000356	3.2808	3.2387	3.841	4.253	3.8458	5.2842	5.2615	4.9259	5.1024	5.2982
pos_2475	Kresoxim-Methyl	metab_1630	yes	C11017	pos	143390-89-0	331.165	3.5686	M+NH4	C18H19NO4	0	55.8	HMDB0253821	-	-	-	-	-	Benzenoids	Phenol ethers	Not Available	0	55.8	-	-	1.3405	1.3358	0.001493	0.003501	4.8159	5.2593	4.9466	5.4208	5.1022	5.5441	5.6791	5.5952	5.6777	5.6765
pos_2532	Trans-zeatin riboside	metab_1694	yes	C16431	pos	6025-53-2	415.171	3.68145	M+ACN+Na	C15H21N5O5	0	37.8	HMDB0304506;HMDB0030388	-	-	map01110;map00908	Metabolism;Metabolism	Global and overview maps;Metabolism of terpenoids and polyketides	Nucleosides, nucleotides, and analogues	Purine nucleosides	Not Available	0	37.8	Biosynthesis of secondary metabolites;Zeatin biosynthesis	Biosynthesis of secondary metabolites;Zeatin biosynthesis	1.3418	1.3287	1.891e-05	0.0001065	5.369	5.26	5.3908	5.2669	5.3598	4.8531	4.8796	4.7208	5.0006	4.8363
pos_2623	7-Amino-4-methylcoumarin	metab_1793	yes	C01386	pos	26093-31-2	217.097	3.90663	M+ACN+H	C10H9NO2	0	37.9	HMDB0247230	-	-	-	-	-	Phenylpropanoids and polyketides	Coumarins and derivatives	Not Available	0	37.9	-	-	1.6188	1.5776	0.004935	0.009774	4.0942	4.0365	3.9052	4.1728	3.1665	4.3651	4.5617	4.7048	4.7658	4.9114
pos_2850	PG(20:1(11Z)/5-iso PGF2VI)	metab_2042	yes	-	pos	-	446.256	4.51122	M+2Na	C44H79O13P	0	37.1	HMDB0269535	-	-	-	-	-	Not Available	Not Available	Not Available	0	37.1	-	-	2.4276	2.4157	0.0007776	0.002024	5.5421	5.0922	5.2985	4.7193	4.812	3.4965	3.1938	3.8335	4.1077	2.4936
pos_2929	Nafazatrom	metab_2129	yes	-	pos	-	301.154	4.76035	M+CH3OH+H	C16H16N2O2	0	41.2	HMDB0255420	-	-	-	-	-	Benzenoids	Naphthalenes	Not Available	0	41.2	-	-	1.1185	1.1134	0.0006303	0.001702	5.099	5.1169	4.9058	4.8254	4.8429	4.6665	4.5456	4.6018	4.5815	4.6117
pos_3004	Supinine	metab_2214	yes	C10403	pos	551-58-6	325.212	4.98573	M+ACN+H	C15H25NO4	0	54.2	HMDB0302362	-	-	-	-	-	Alkaloids and derivatives	Not Available	Not Available	0	54.2	-	-	1.0548	1.0458	0.000697	0.001848	4.2914	4.219	4.234	4.2346	4.2746	3.9716	3.9716	3.7088	3.9937	4.0294
pos_3073	(R)-Marmin	metab_2290	yes	-	pos	14957-38-1	371.127	5.19377	M+K	C19H24O5	0	44.1	HMDB0030787	-	-	-	-	-	Phenylpropanoids and polyketides	Coumarins and derivatives	Not Available	0	44.1	-	-	1.7723	1.7563	1.579e-08	1.735e-06	4.8992	4.9293	4.9515	4.9423	5.0907	4.1826	4.1923	4.1376	4.1638	4.1964
pos_3094	N6-phenylisopropyladenosine	metab_2313	yes	-	pos	-	449.192	5.25775	M+ACN+Na	C19H23N5O4	0	80.8	HMDB0255302	-	-	-	-	-	Nucleosides, nucleotides, and analogues	Purine nucleosides	Not Available	0	80.8	-	-	1.1391	1.1421	0.007192	0.01343	4.426	4.3793	4.2388	4.1619	4.0759	3.55	3.8658	3.7695	4.154	3.8474
pos_3164	PS(PGJ2/14:1(9Z))	metab_2391	yes	-	pos	-	748.424	5.45847	M+H-2H2O	C40H66NO12P	0	55.2	HMDB0280935	-	-	-	-	-	Not Available	Not Available	Not Available	0	55.2	-	-	1.0321	1.0399	0.007761	0.01435	5.0144	5.3484	5.1066	5.4741	5.4434	5.6588	5.5788	5.5276	5.6258	5.7368
pos_3175	Uralenolide	metab_2403	yes	-	pos	111150-27-7	513.299	5.50647	M+2Na-H	C30H44O4	0	47.5	HMDB0038797	-	-	-	-	-	Lipids and lipid-like molecules	Steroids and steroid derivatives	Not Available	0	47.5	-	-	1.7843	1.7721	2.749e-07	1.102e-05	4.3763	4.5261	4.282	4.3694	4.5001	5.2667	5.2348	5.153	5.1765	5.2852
pos_3196	5,6-Dihydro-11-methoxyyangonin	metab_2426	yes	-	pos	-	308.149	5.56308	M+NH4	C16H18O5	0	58.5	HMDB0038722	-	-	-	-	-	Phenylpropanoids and polyketides	Kavalactones	Not Available	0	58.5	-	-	1.2341	1.2255	1.372e-06	2.886e-05	4.6357	4.7777	4.7292	4.7161	4.7771	5.1539	5.1648	5.1	5.0856	5.0928
pos_3231	Bioepiderm	metab_2465	yes	C00120	pos	58-85-5	308.106	5.69148	M+ACN+Na	C10H16N2O3S	0	47.1	HMDB0249220;HMDB0000030	Vitamins and cofactors	Cofactors	map01100;map00780;map02010;map04977;map01240	Metabolism;Metabolism;Environmental Information Processing;Organismal Systems;Metabolism	Global and overview maps;Metabolism of cofactors and vitamins;Membrane transport;Digestive system;Global and overview maps	Organoheterocyclic compounds	Biotin and derivatives	Not Available	0	47.1	Metabolic pathways;Biotin metabolism;ABC transporters;Vitamin digestion and absorption;Biosynthesis of cofactors	Metabolic pathways;Biotin metabolism;ABC transporters;Vitamin digestion and absorption;Biosynthesis of cofactors	1.3973	1.3791	1.842e-06	3.415e-05	5.4142	5.3333	5.4706	5.4541	5.5496	4.9853	4.9708	4.899	4.982	4.8985
pos_3267	Alpha-Allocryptopine	metab_2502	yes	C02134	pos	-	411.191	5.80398	M+ACN+H	C21H23NO5	0	44.3	HMDB0302683	-	-	map00950;map01110	Metabolism;Metabolism	Biosynthesis of other secondary metabolites;Global and overview maps	Alkaloids and derivatives	Protopine alkaloids	Not Available	0	44.3	Isoquinoline alkaloid biosynthesis;Biosynthesis of secondary metabolites	Isoquinoline alkaloid biosynthesis;Biosynthesis of secondary metabolites	1.4459	1.4395	1.603e-07	7.486e-06	5.5197	5.6227	5.6219	5.6106	5.7084	6.1712	6.1652	6.1272	6.1685	6.1221
pos_3272	Deoxycholyltryptophan	metab_2508	yes	-	pos	-	623.343	5.81198	M+2Na-H	C35H50N2O5	0	60.8	HMDB0242417	-	-	-	-	-	Not Available	Not Available	Not Available	0	60.8	-	-	1.4772	1.482	0.01479	0.02514	3.3882	3.1873	3.1965	4.0858	3.2133	3.9185	4.5965	4.2796	3.664	4.2527
pos_3335	Cer(d16:1/LTE4)	metab_2578	yes	-	pos	-	347.249	5.94782	M+2H	C39H68N2O6S	0	51.7	HMDB0289854	-	-	-	-	-	Not Available	Not Available	Not Available	0	51.7	-	-	1.6419	1.6324	6.74e-05	0.0002892	4.4144	4.797	4.3696	4.6028	4.4534	5.2184	5.2465	5.3387	5.3895	5.0629
pos_3418	Caramiphen	metab_2668	yes	-	pos	-	579.411	6.10727	2M+H	C18H27NO2	0	32.1	HMDB0249602	-	-	-	-	-	Benzenoids	Benzene and substituted derivatives	Not Available	0	32.1	-	-	1.8396	1.8242	9.058e-06	6.036e-05	5.5403	5.7688	5.3606	5.3437	5.3291	6.3217	6.3846	6.2577	6.4138	6.3484
pos_3459	Deoxycholylarginine	metab_2712	yes	-	pos	-	549.401	6.1868	M+H	C30H52N4O5	0	42.3	HMDB0242418	-	-	-	-	-	Not Available	Not Available	Not Available	0	42.3	-	-	2.0455	2.0292	2.032e-07	8.927e-06	5.5259	5.8159	5.6564	5.8827	5.7517	6.8007	6.8454	6.7449	6.8153	6.7515
pos_3472	Hydromorphone	metab_2727	yes	C07042	pos	466-99-9	303.17	6.22658	M+NH4	C17H19NO3	0	32.8	HMDB0014472;PW_C008858	-	-	-	-	-	Alkaloids and derivatives	Morphinans	Not Available	0	32.8	-	-	1.5154	1.4976	0.005258	0.0103	4.5781	4.8954	4.7948	4.5846	4.7548	4.4698	3.3893	3.9394	4.0852	4.1582
pos_3553	PC(PGD1/16:0)	metab_2815	yes	-	pos	-	796.542	6.45648	M+H-2H2O	C44H82NO11P	0	42.3	HMDB0285990	-	-	-	-	-	Not Available	Not Available	Not Available	0	42.3	-	-	3.0489	3.0227	0.000577	0.001579	3.9944	3.9905	3.9997	4.0193	4.0165	5.8649	7.2114	7.4032	5.0996	7.3974
pos_3693	P-Coumaraldehyde	metab_2967	yes	C05608	pos	2538-87-6;20711-53-9	181.086	6.9414	M+CH3OH+H	C9H8O2	0	43.8	HMDB0040986	-	-	map01100;map00940;map01110;map01061	Metabolism;Metabolism;Metabolism;Metabolism	Global and overview maps;Biosynthesis of other secondary metabolites;Global and overview maps;Chemical structure transformation maps	Phenylpropanoids and polyketides	Cinnamaldehydes	Not Available	0	43.8	Metabolic pathways;Phenylpropanoid biosynthesis;Biosynthesis of secondary metabolites;Biosynthesis of phenylpropanoids	Metabolic pathways;Phenylpropanoid biosynthesis;Biosynthesis of secondary metabolites;Biosynthesis of phenylpropanoids	1.0671	1.0536	0.003501	0.007292	4.8007	4.4626	4.7826	4.7404	4.9043	4.3148	4.3623	4.3607	4.5399	4.408
pos_3773	DG(PGE1/0:0/18:0)	metab_3053	yes	-	pos	-	659.52	7.30698	M+H-2H2O	C41H74O8	0	54.7	HMDB0296002	-	-	-	-	-	Not Available	Not Available	Not Available	0	54.7	-	-	1.3785	1.3649	0.0002831	0.0008888	5.3956	5.5768	5.3525	5.2768	5.2591	4.8514	4.7941	5.0178	4.9377	4.6437
pos_392	Arabinofuranosylthymine	metab_3215	yes	-	pos	-	259.092	2.33327	M+H-H2O, M+H	C10H14N2O6	0	63.5	HMDB0248554	-	-	-	-	-	Nucleosides, nucleotides, and analogues	Pyrimidine nucleosides	Not Available	0	63.5	-	-	1.9619	1.934	5.668e-06	4.363e-05	5.3603	5.6848	5.54	5.6503	5.1919	6.4753	6.4393	6.4502	6.4889	6.5085
pos_3987	E-10-Hydroxynortriptyline	metab_3288	yes	-	pos	-	597.287	7.81532	2M+K	C19H21NO	0	61.7	HMDB0013889	-	-	-	-	-	Benzenoids	Dibenzocycloheptenes	Not Available	0	61.7	-	-	1.4227	1.4135	5.403e-07	1.627e-05	5.5501	5.6982	5.6379	5.7282	5.7486	6.1868	6.2102	6.1865	6.1855	6.1902
pos_409	DG(PGF2alpha/2:0/0:0)	metab_3403	yes	-	pos	-	471.293	2.62005	M+2H, M+H	C25H42O8	0	43	HMDB0296916	-	-	-	-	-	Not Available	Not Available	Not Available	0	43	-	-	1.5087	1.495	2.898e-06	4.363e-05	6.6443	6.457	6.5802	6.4633	6.531	5.9281	5.8768	5.9021	6.0853	5.9525
pos_4330	1,4-Ipomeadiol	metab_3668	yes	-	pos	53011-73-7	153.091	6.9414	M+H-H2O	C9H14O3	0	63.1	HMDB0030471	-	-	-	-	-	Organoheterocyclic compounds	Heteroaromatic compounds	Not Available	0	63.1	-	-	1.2303	1.2109	0.0004226	0.001227	4.5081	4.3874	4.5642	4.5735	4.6444	4.1034	3.9356	4.1843	4.287	4.0877
pos_4457	Biolimus A9	metab_3808	yes	-	pos	-	950.608	6.71083	M+H-2H2O	C55H87NO14	0	92.5	HMDB0249224	-	-	-	-	-	Phenylpropanoids and polyketides	Macrolide lactams	Not Available	0	92.5	-	-	1.6523	1.639	0.002334	0.005127	6.27	6.2697	6.1996	6.109	6.1724	5.7541	5.5435	4.688	5.5376	5.4239
pos_4476	Gonal	metab_3829	yes	-	pos	-	278.248	6.67905	M+NH4	C18H28O	0	47.2	HMDB0252913	-	-	-	-	-	Lipids and lipid-like molecules	Steroids and steroid derivatives	Not Available	0	47.2	-	-	1.1837	1.168	0.01776	0.02938	5.3787	5.1773	5.3767	5.5028	5.4454	5.2994	5.0022	4.7345	5.0525	4.4246
pos_4626	N-Oleoyl Arginine	metab_3995	yes	-	pos	-	439.364	6.44852	M+H	C24H46N4O3	0	80.6	HMDB0241954	-	-	-	-	-	Not Available	Not Available	Not Available	0	80.6	-	-	2.0621	2.0437	1.537e-06	3.1e-05	5.8075	6.2689	5.9105	6.1646	5.9602	7.1735	7.1144	7.1114	7.1241	7.0467
pos_4770	Olanzapine	metab_4152	yes	C07322	pos	132539-06-1	647.271	6.26568	2M+Na	C17H20N4S	0	36	HMDB0005012	-	-	-	-	-	Organoheterocyclic compounds	Benzodiazepines	Not Available	0	36	-	-	2.1	2.077	9.272e-06	6.144e-05	4.3645	4.5947	4.5138	4.3894	4.3866	5.5646	5.8845	5.7816	5.3088	5.4315
pos_4859	N-Eicosapentaenoyl Arginine	metab_4249	yes	-	pos	-	500.358	6.17883	M+ACN+H	C26H42N4O3	0	36.8	HMDB0242065	-	-	-	-	-	Not Available	Not Available	Not Available	0	36.8	-	-	1.7465	1.7396	0.002524	0.005478	5.7816	6.2185	5.3322	5.5858	5.2622	4.895	5.0024	4.7458	4.6694	4.2855
pos_4893	Deoxycholylcysteine	metab_4287	yes	-	pos	-	478.299	6.13907	M+H-H2O	C27H45NO5S	0	40.7	HMDB0242415	-	-	-	-	-	Not Available	Not Available	Not Available	0	40.7	-	-	1.9665	1.9442	2.283e-06	4.018e-05	5.5837	5.6338	5.6155	5.7111	5.676	4.7315	4.6146	4.414	4.901	4.6057
pos_4914	4-Vinylcyclohexene dioxide	metab_4311	yes	C19311	pos	-	123.081	6.12315	M+H-H2O	C8H12O2	0	36	HMDB0246593	-	-	-	-	-	Organoheterocyclic compounds	Oxepanes	Not Available	0	36	-	-	1.3294	1.3273	3.777e-08	3.136e-06	4.9815	5.0279	4.9874	5.0839	4.9837	4.5418	4.5884	4.5807	4.5401	4.5759
pos_5011	Manzamine A	metab_4420	yes	C19898	pos	104196-68-1	566.38	6.05148	M+NH4	C36H44N4O	0	56.6	HMDB0242555	-	-	-	-	-	Alkaloids and derivatives	Harmala alkaloids	Not Available	0	56.6	-	-	1.1704	1.1744	0.0004205	0.001226	5.8367	5.9855	5.726	5.9178	5.9425	5.4255	5.4778	5.4303	5.4858	5.6846
pos_5045	(-)-Slaframine	metab_4455	yes	C06185	pos	20084-93-9	419.26	6.02748	2M+Na	C10H18N2O2	0	34.8	HMDB0243523	-	-	map01110;map00960;map01064	Metabolism;Metabolism;Metabolism	Global and overview maps;Biosynthesis of other secondary metabolites;Chemical structure transformation maps	Organoheterocyclic compounds	Indolizidines	Not Available	0	34.8	Biosynthesis of secondary metabolites;Tropane, piperidine and pyridine alkaloid biosynthesis;Biosynthesis of alkaloids derived from ornithine, lysine and nicotinic acid	Biosynthesis of secondary metabolites;Tropane, piperidine and pyridine alkaloid biosynthesis;Biosynthesis of alkaloids derived from ornithine, lysine and nicotinic acid	1.0893	1.0858	5.546e-06	4.363e-05	5.3314	5.3831	5.3843	5.3205	5.2841	4.9698	5.1014	5.0176	5.0534	5.0129
pos_5074	Naproxen	metab_4486	yes	C01517	pos	22204-53-1	248.128	6.0035	M+NH4	C14H14O3	0	31.1	PW_C001282;HMDB0001923;MJDBOTE0000494	-	-	-	-	-	Benzenoids	Naphthalenes	Not Available	0	31.1	-	-	1.0295	1.0232	0.0007444	0.001953	4.078	4.2428	4.1778	4.3117	4.1885	4.6314	4.5375	4.5181	4.4375	4.3866
pos_5109	Dialdehyde	metab_4525	yes	C11678	pos	85955-83-5	401.207	5.9638	M+CH3OH+H	C21H24N2O4	0	59.4	HMDB0251125	-	-	map00901	Metabolism	Biosynthesis of other secondary metabolites	Alkaloids and derivatives	Harmala alkaloids	Not Available	0	59.4	Indole alkaloid biosynthesis	Indole alkaloid biosynthesis	1.0978	1.0785	0.005369	0.01048	4.3438	3.8563	3.9681	4.1604	4.3323	3.7637	3.7537	3.7473	3.795	3.7577
pos_5150	Norhydromorphone	metab_4571	yes	-	pos	-	289.154	5.93182	M+NH4	C16H17NO3	0	33.1	HMDB0014004	-	-	-	-	-	Alkaloids and derivatives	Morphinans	Not Available	0	33.1	-	-	1.0322	1.0075	0.01025	0.01823	3.8161	3.6036	3.4697	3.8145	3.9142	3.6263	3.3141	3.3078	3.3554	3.3181
pos_5176	Integerrimine	metab_4599	yes	C10328	pos	480-79-5	399.191	5.8998	M+ACN+Na	C18H25NO5	0	86.4	HMDB0242680	-	-	-	-	-	Phenylpropanoids and polyketides	Macrolides and analogues	Not Available	0	86.4	-	-	1.0717	1.0545	0.01534	0.02597	3.2864	3.27	3.7667	3.638	3.875	3.1774	3.2103	3.161	3.2087	3.1714
pos_5189	Fagomine	metab_4613	yes	C10144	pos	53185-12-9	333.144	5.8838	2M+K	C6H13NO3	0	49.4	HMDB0033453	-	-	-	-	-	Organoheterocyclic compounds	Piperidines	Not Available	0	49.4	-	-	1.3959	1.3844	0.0001638	0.0005767	4.9254	5.258	5.106	5.3617	5.0718	5.6411	5.7513	5.7111	5.6249	5.6375
pos_5226	L-3-Phenyllactic acid	metab_4654	yes	C05607	pos	20312-36-1;7326-19-4	350.16	5.81998	2M+NH4	C9H10O3	0	39.3	HMDB0000748;HMDB0000563	-	-	map01100;map00960;map00360;map01064	Metabolism;Metabolism;Metabolism;Metabolism	Global and overview maps;Biosynthesis of other secondary metabolites;Amino acid metabolism;Chemical structure transformation maps	Phenylpropanoids and polyketides	Phenylpropanoic acids	Not Available	0	39.3	Metabolic pathways;Tropane, piperidine and pyridine alkaloid biosynthesis;Phenylalanine metabolism;Biosynthesis of alkaloids derived from ornithine, lysine and nicotinic acid	Metabolic pathways;Tropane, piperidine and pyridine alkaloid biosynthesis;Phenylalanine metabolism;Biosynthesis of alkaloids derived from ornithine, lysine and nicotinic acid	1.3438	1.3266	0.0001396	0.0005082	5.0279	5.2172	5.083	5.2514	4.969	5.5314	5.7516	5.622	5.6003	5.4745
pos_5276	Cholylglutamic acid	metab_4709	yes	-	pos	-	502.316	5.73148	M+H-2H2O	C29H47NO8	0	70.8	HMDB0242384	-	-	-	-	-	Not Available	Not Available	Not Available	0	70.8	-	-	1.1136	1.1075	1.714e-05	9.905e-05	4.9365	5.0259	4.9735	5.0679	4.9815	5.3331	5.3679	5.2537	5.3945	5.2655
pos_5408	Ximoprofen	metab_4855	yes	-	pos	-	325.152	5.43447	M+ACN+Na	C15H19NO3	0	33.3	HMDB0259932	-	-	-	-	-	Phenylpropanoids and polyketides	Phenylpropanoic acids	Not Available	0	33.3	-	-	1.8366	1.8234	6.506e-06	4.649e-05	4.5975	4.6152	4.6207	4.5404	4.6565	4.0061	3.8323	3.628	3.5579	3.64
pos_5441	1-Tert-butyl 4-ethyl 5-oxoazepane-1,4-dicarboxylate	metab_4892	yes	-	pos	-	303.191	5.3544	M+NH4	C14H23NO5	0	43.3	HMDB0244604	-	-	-	-	-	Organoheterocyclic compounds	Azepanes	Not Available	0	43.3	-	-	1.0359	1.0417	0.002484	0.005402	5.5691	5.1821	5.5	5.3199	5.3732	5.082	5.0532	4.9724	5.1584	5.067
pos_5449	Morphine	metab_4900	yes	C01516	pos	57-27-2	303.17	5.34577	M+NH4	C17H19NO3	0	34.6	PW_C008829;HMDB0014440	-	-	map01100;map01110;map00982;map00950;map04080;map01063	Metabolism;Metabolism;Metabolism;Metabolism;Environmental Information Processing;Metabolism	Global and overview maps;Global and overview maps;Xenobiotics biodegradation and metabolism;Biosynthesis of other secondary metabolites;Signaling molecules and interaction;Chemical structure transformation maps	Alkaloids and derivatives	Morphinans	Not Available	0	34.6	Metabolic pathways;Biosynthesis of secondary metabolites;Drug metabolism - cytochrome P450;Isoquinoline alkaloid biosynthesis;Neuroactive ligand-receptor interaction;Biosynthesis of alkaloids derived from shikimate pathway	Metabolic pathways;Biosynthesis of secondary metabolites;Drug metabolism - cytochrome P450;Isoquinoline alkaloid biosynthesis;Neuroactive ligand-receptor interaction;Biosynthesis of alkaloids derived from shikimate pathway	1.3512	1.3353	1.188e-05	7.45e-05	6.1403	6.1521	6.1505	6.0799	6.2121	5.8331	5.5789	5.5984	5.6676	5.6879
pos_5450	Tenuazonic acid	metab_4902	yes	C08511	pos	27778-66-1;610-88-8	180.102	5.34577	M+H-H2O	C10H15NO3	0	60.1	HMDB0036074	-	-	-	-	-	Organoheterocyclic compounds	Pyrrolines	Not Available	0	60.1	-	-	1.1322	1.1202	2.579e-06	4.308e-05	5.6901	5.7372	5.7051	5.7184	5.7894	5.4815	5.3659	5.3582	5.3895	5.4078
pos_5519	PI(TXB2/18:1(9Z))	metab_4975	yes	-	pos	-	498.256	5.20977	M+2Na	C47H83O17P	0	58.6	HMDB0276587	-	-	-	-	-	Not Available	Not Available	Not Available	0	58.6	-	-	2.141	2.1282	9.019e-05	0.0003609	5.6075	5.1168	5.4661	5.2556	5.1221	3.9431	3.8896	4.1825	4.5838	3.8079
pos_5583	(2E)-Piperamide-C5:1	metab_5046	yes	-	pos	117137-65-2	291.17	5.08175	M+NH4	C16H19NO3	0	41.1	HMDB0038834	-	-	-	-	-	Organoheterocyclic compounds	Benzodioxoles	Not Available	0	41.1	-	-	1.4089	1.4026	1.672e-05	9.7e-05	4.6633	4.7825	4.8365	4.7972	4.9581	4.3633	4.2675	4.3329	4.1868	4.3102
pos_5690	3-Phenylprop-2-enal	metab_5163	yes	C00903	pos	104-55-2	165.091	4.85707	M+CH3OH+H	C9H8O	0	30.5	HMDB0245299;HMDB0003441	-	-	map01100;map00940;map01110;map04750;map01060	Metabolism;Metabolism;Metabolism;Organismal Systems;Metabolism	Global and overview maps;Biosynthesis of other secondary metabolites;Global and overview maps;Sensory system;Chemical structure transformation maps	Phenylpropanoids and polyketides	Cinnamaldehydes	Not Available	0	30.5	Metabolic pathways;Phenylpropanoid biosynthesis;Biosynthesis of secondary metabolites;Inflammatory mediator regulation of TRP channels;Biosynthesis of plant secondary metabolites	Metabolic pathways;Phenylpropanoid biosynthesis;Biosynthesis of secondary metabolites;Inflammatory mediator regulation of TRP channels;Biosynthesis of plant secondary metabolites	1.0374	1.0296	3.925e-05	0.0001879	4.5937	4.7599	4.6488	4.7384	4.6896	5.0085	5.0204	4.9572	4.9257	4.9476
pos_5752	Kallidin	metab_5231	yes	C01505	pos	342-10-9	594.83	4.72837	M+2H	C56H85N17O12	0	49	HMDB0253760	-	-	-	-	-	Organic Polymers	Polypeptides	Not Available	0	49	-	-	1.914	1.8964	7.774e-08	4.809e-06	5.9524	6.0003	5.8476	5.7913	5.8324	4.9467	4.9782	4.9354	5.061	4.8673
pos_5773	Saxitoxin	metab_5254	yes	C13757	pos	35523-89-8	264.123	4.67972	M+H-2H2O	C10H17N7O4	0	38.8	HMDB0029368	-	-	-	-	-	Phenylpropanoids and polyketides	Saxitoxins, gonyautoxins, and derivatives	Not Available	0	38.8	-	-	1.3102	1.3043	3.339e-06	4.363e-05	4.3779	4.496	4.4226	4.5424	4.5716	4.9687	4.961	4.917	4.9146	4.8844
pos_5813	DG(15:0/0:0/TXB2)	metab_5299	yes	-	pos	-	357.235	4.59172	M+2Na	C38H68O9	0	44.5	HMDB0295269	-	-	-	-	-	Not Available	Not Available	Not Available	0	44.5	-	-	1.687	1.6679	3.57e-07	1.217e-05	4.1588	4.2795	4.0656	4.2199	4.0913	4.8405	4.8548	4.9194	4.8364	4.9716
pos_5859	CDP-DG(20:5(6E,8Z,11Z,14Z,17Z)-OH(5)/i-20:0)	metab_5349	yes	-	pos	-	536.782	4.50322	M+2H	C52H87N3O16P2	0	38.7	HMDB0294156	-	-	-	-	-	Not Available	Not Available	Not Available	0	38.7	-	-	1.7846	1.7666	7.148e-07	1.942e-05	5.5977	5.4952	5.557	5.4175	5.5318	4.6405	4.7701	4.5947	4.8713	4.6605
pos_5878	Hordatine A	metab_5370	yes	C08307	pos	7073-64-5	531.277	4.4632	M+H-2H2O	C28H38N8O5	0	39.6	HMDB0030461	-	-	-	-	-	Phenylpropanoids and polyketides	2-arylbenzofuran flavonoids	Not Available	0	39.6	-	-	1.9701	1.9557	8.891e-05	0.0003575	5.2432	5.2822	5.2195	5.0772	5.0699	4.1289	4.1575	3.6443	4.4932	4.2341
pos_6130	Berberine	metab_5652	yes	C00757	pos	2086-83-1	354.157	4.00333	M+NH4	C20H18NO4+	0	36	HMDB0003409;MJDBOTE0001023	-	-	map00950;map01110;map01063;map04152	Metabolism;Metabolism;Metabolism;Environmental Information Processing	Biosynthesis of other secondary metabolites;Global and overview maps;Chemical structure transformation maps;Signal transduction	Alkaloids and derivatives	Protoberberine alkaloids and derivatives	Not Available	0	36	Isoquinoline alkaloid biosynthesis;Biosynthesis of secondary metabolites;Biosynthesis of alkaloids derived from shikimate pathway;AMPK signaling pathway	Isoquinoline alkaloid biosynthesis;Biosynthesis of secondary metabolites;Biosynthesis of alkaloids derived from shikimate pathway;AMPK signaling pathway	1.9402	1.9204	1.501e-05	8.946e-05	3.8836	4.0566	3.6406	3.8037	3.7073	3.059	2.6589	2.8811	2.9184	2.6629
pos_6194	Biotin sulfoxide	metab_5722	yes	C20386	pos	-	261.09	3.90663	M+H	C10H16N2O4S	0	38.2	HMDB0249229	-	-	map01100;map00780	Metabolism;Metabolism	Global and overview maps;Metabolism of cofactors and vitamins	Organoheterocyclic compounds	Biotin and derivatives	Not Available	0	38.2	Metabolic pathways;Biotin metabolism	Metabolic pathways;Biotin metabolism	1.111	1.1022	1.473e-05	8.828e-05	5.232	5.359	5.3063	5.3941	5.3461	5.7211	5.6742	5.6044	5.6151	5.6423
pos_6490	Pseudoecgonine	metab_6051	yes	C12449	pos	-	218.139	3.44808	M+CH3OH+H	C9H15NO3	0	68	HMDB0006348	-	-	map00960	Metabolism	Biosynthesis of other secondary metabolites	Alkaloids and derivatives	Tropane alkaloids	Not Available	0	68	Tropane, piperidine and pyridine alkaloid biosynthesis	Tropane, piperidine and pyridine alkaloid biosynthesis	1.1204	1.1444	0.03623	0.05395	3.1534	3.7652	3.9293	4.1137	4.2661	4.3817	4.3989	4.2719	4.2941	4.3195
pos_6628	Benzo[a]pyrene-7,8-dihydrodiol-9,10-oxide	metab_6202	yes	C14853	pos	55097-80-8;58917-67-2	344.127	3.24138	M+ACN+H	C20H14O3	0	35.8	HMDB0062470	-	-	map05204;map00980	Human Diseases;Metabolism	Cancer: overview;Xenobiotics biodegradation and metabolism	Benzenoids	Pyrenes	Not Available	0	35.8	Chemical carcinogenesis - DNA adducts;Metabolism of xenobiotics by cytochrome P450	Chemical carcinogenesis - DNA adducts;Metabolism of xenobiotics by cytochrome P450	3.0696	3.0378	0.00145	0.003414	0.619	0.616	0.623	3.4459	0.6359	4.3083	3.9561	3.8801	3.6069	3.8548
pos_6806	4-Hydroxy-5-phenyltetrahydro-1,3-oxazin-2-one	metab_6398	yes	C16595	pos	-	176.071	3.0092	M+H-H2O	C10H11NO3	0	80.9	HMDB0060389;PW_C040532	-	-	map00982	Metabolism	Xenobiotics biodegradation and metabolism	Benzenoids	Benzene and substituted derivatives	Not Available	0	80.9	Drug metabolism - cytochrome P450	Drug metabolism - cytochrome P450	1.2385	1.2416	0.0002681	0.0008507	4.4355	4.2356	4.1463	4.3638	4.5182	4.8226	4.8022	4.7376	4.7252	4.7584
pos_6882	DG(PGD2/0:0/8:0)	metab_6481	yes	-	pos	-	299.171	2.9057	M+2Na	C31H52O8	0	38.8	HMDB0297118	-	-	-	-	-	Not Available	Not Available	Not Available	0	38.8	-	-	1.1545	1.1552	0.0006605	0.001767	5.4456	5.2443	5.4496	5.2414	5.2885	5.0065	4.8059	4.8729	5.1023	4.9891
pos_7029	3-Deazaadenosine	metab_6645	yes	C01736	pos	550-33-4	289.092	2.77982	M+Na	C11H14N4O4	0	53.8	HMDB0245849;HMDB0029956	-	-	-	-	-	Nucleosides, nucleotides, and analogues	Imidazole[4,5-c]pyridine ribonucleosides and ribonucleotides	Not Available	0	53.8	-	-	1.9467	1.9241	3.075e-06	4.363e-05	3.5502	3.8748	3.5461	3.7113	3.5122	4.7158	4.6795	4.631	4.4242	4.607
pos_7105	Minocycline	metab_6730	yes	C07225	pos	10118-90-8	490.215	2.68427	M+CH3OH+H	C23H27N3O7	0	55	HMDB0015152;LMPK07000002;PW_C009450	-	-	-	-	-	Phenylpropanoids and polyketides	Tetracyclines	Not Available	0	55	-	-	1.6156	1.5984	2.777e-06	4.363e-05	6.451	6.2458	6.413	6.3191	6.4179	5.6819	5.6367	5.6154	5.863	5.6992
pos_725	VIQUALINE	metab_6886	yes	-	pos	-	684.429	4.87307	M+ACN+Na, 2M+ACN+Na	C20H26N2O	0	30.8	HMDB0259835	-	-	-	-	-	Organoheterocyclic compounds	Quinolines and derivatives	Not Available	0	30.8	-	-	1.3619	1.3475	3.039e-06	4.363e-05	5.8121	5.7225	5.8219	5.8224	5.8412	5.3392	5.225	5.2665	5.4138	5.3911
pos_7278	Trigonelline	metab_6916	yes	C01004	pos	535-83-1	138.055	1.7974	M+H	C7H7NO2	91.9	0	HMDB0000875	-	-	map00760	Metabolism	Metabolism of cofactors and vitamins	Alkaloids and derivatives	Not Available	Not Available	91.9	0	Nicotinate and nicotinamide metabolism	Nicotinate and nicotinamide metabolism	1.5596	1.5524	1.89e-05	0.0001065	4.9164	5.1589	5.1102	5.194	5.243	4.6308	4.4936	4.5271	4.4056	4.4043
pos_857	Petasinine	metab_7537	yes	-	pos	70474-33-8	303.17	6.08332	M+NH4, M+ACN+Na	C13H21NO3	0	44.7	HMDB0030516	-	-	-	-	-	Organoheterocyclic compounds	Pyrrolizidines	Not Available	0	44.7	-	-	1.083	1.0792	0.0002762	0.0008703	5.6094	5.5187	5.4915	5.4163	5.4083	5.1778	5.0451	5.1135	5.2056	5.268
pos_3262	Herniarin	metab_7723	yes	C09268	pos	531-59-9	177.055	5.78008	M+H	C10H8O3	0	53.3	HMDB0029758;HMDB0247248;MJDBOTE0001736	-	-	-	-	-	Phenylpropanoids and polyketides	Coumarins and derivatives	Not Available	0	53.3	-	-	1.0453	1.0402	3.735e-05	0.0001811	4.81	4.9587	4.9774	4.9325	4.9834	5.2225	5.2615	5.2053	5.2554	5.1751
pos_860	Isosafrole	metab_7729	yes	C10472	pos	120-58-1;94-59-7	180.102	6.09132	M+H, M+NH4	C10H10O2	36.6	0	HMDB0253689;HMDB0033591	-	-	-	-	-	Organoheterocyclic compounds	Benzodioxoles	Not Available	36.6	0	-	-	1.0674	1.0569	3.537e-06	4.363e-05	5.7269	5.7306	5.6973	5.6601	5.687	5.4783	5.3484	5.3753	5.4326	5.3987
neg_1201	Amabiline	metab_7981	yes	C10263	neg	17958-43-9	304.151	1.91763	M+Na-2H	C15H25NO4	0	33.1	HMDB0302358	-	-	-	-	-	Alkaloids and derivatives	Not Available	Not Available	0	33.1	-	-	1.016	1.0154	2.21e-05	6.377e-05	5.7898	5.7137	5.7731	5.6207	5.6542	5.3491	5.342	5.2766	5.4274	5.3673
neg_1382	Paliperidone	metab_8181	yes	C21516	neg	144598-75-4	471.209	3.29633	M+FA-H	C23H27FN4O3	0	30.2	HMDB0247256;HMDB0015396;HMDB0256085	-	-	-	-	-	Organoheterocyclic compounds	Pyridopyrimidines	Not Available	0	30.2	-	-	1.0106	1.0126	9.391e-05	0.0002094	6.1689	5.9272	6.1164	6.0439	5.9906	5.6697	5.6964	5.5959	5.7586	5.7063
neg_1418	Naloxone	metab_8221	yes	C07252	neg	465-65-6	348.123	3.33547	M+Na-2H	C19H21NO4	0	40.1	HMDB0015314;PW_C009596	-	-	-	-	-	Benzenoids	Phenanthrenes and derivatives	Not Available	0	40.1	-	-	1.3245	1.3167	3.715e-07	2.58e-06	5.8974	5.8565	5.7818	5.7635	5.8097	5.2459	5.323	5.184	5.2774	5.1593
neg_1458	2-Hydroxyfelbamate	metab_8265	yes	C16582	neg	-	235.072	3.38312	M-H2O-H	C11H14N2O5	0	59.9	PW_C040524;HMDB0060670	-	-	map00982	Metabolism	Xenobiotics biodegradation and metabolism	Lipids and lipid-like molecules	Glycerolipids	Not Available	0	59.9	Drug metabolism - cytochrome P450	Drug metabolism - cytochrome P450	1.029	1.0298	0.003384	0.005045	4.8803	5.0789	5.0072	5.1657	5.4669	4.6968	4.7653	4.6839	4.6624	4.7305
neg_1656	Hippuric acid sulfate	metab_8484	yes	-	neg	-	239.997	3.61147	M-H2O-H	C9H9NO6S	0	40.8	HMDB0304910	-	-	-	-	-	Not Available	Not Available	Not Available	0	40.8	-	-	1.3406	1.3452	0.0001221	0.0002604	3.8696	4.3471	4.1939	4.2834	4.3546	4.8596	4.9268	4.8355	4.8852	4.7728
neg_1741	Pyropheophorbide a	metab_8579	yes	C18064	neg	-	515.247	3.714	M-H2O-H	C33H34N4O3	0	59.5	HMDB0256993	-	-	map01110;map00860	Metabolism;Metabolism	Global and overview maps;Metabolism of cofactors and vitamins	Not Available	Not Available	Not Available	0	59.5	Biosynthesis of secondary metabolites;Porphyrin and chlorophyll metabolism	Biosynthesis of secondary metabolites;Porphyrin and chlorophyll metabolism	1.3855	1.3791	2.455e-06	1.122e-05	6.2292	6.0271	6.1559	6.0458	6.1095	5.426	5.4481	5.3914	5.6241	5.4455
neg_1886	2-(4-(2-Carboxyethyl)phenethylamino)-5'-N-ethylcarboxamidoadenosine	metab_8739	yes	-	neg	-	480.195	3.90323	M-H2O-H	C23H29N7O6	0	45.2	HMDB0249866	-	-	-	-	-	Nucleosides, nucleotides, and analogues	Purine nucleosides	Not Available	0	45.2	-	-	1.5769	1.5768	0.0001433	0.000298	5.4808	5.5669	5.2918	5.3672	5.3343	4.6941	4.7407	4.7217	4.2634	4.194
neg_1889	2-[(E)-2-(3-Nitrophenyl)vinyl]quinoline	metab_8742	yes	-	neg	-	297.066	3.91105	M+Na-2H	C17H12N2O2	0	30.1	HMDB0244962	-	-	-	-	-	Organoheterocyclic compounds	Quinolines and derivatives	Not Available	0	30.1	-	-	1.1371	1.1446	0.0005987	0.001048	2.7612	2.7567	2.754	2.7725	3.0272	3.4386	3.3648	3.3693	3.3085	3.0278
neg_2067	11,13-Dihydrotaraxinic acid glucosyl ester	metab_8940	yes	-	neg	75911-16-9	407.167	4.14732	M-H2O-H	C21H30O9	0	58.2	HMDB0035867	-	-	-	-	-	Lipids and lipid-like molecules	Saccharolipids	Not Available	0	58.2	-	-	1.0864	1.0963	0.001932	0.003011	5.513	5.2574	5.3962	5.2144	5.1246	4.775	4.8278	4.63	5.0872	4.8867
neg_2141	Indole carboxylic acid sulfate	metab_9023	yes	-	neg	-	239.997	4.25702	M-H	C9H7NO5S	0	39.1	HMDB0304912	-	-	-	-	-	Not Available	Not Available	Not Available	0	39.1	-	-	1.5616	1.5583	5.599e-07	3.598e-06	4.6564	4.8117	4.5162	4.787	4.5945	5.4795	5.5108	5.4606	5.4881	5.5215
neg_2181	17-O-deacetylvindoline	metab_9067	yes	C01091	neg	-	452.171	4.32823	M+K-2H	C23H31N2O5+	0	71.4	HMDB0304032	-	-	map01110;map00901	Metabolism;Metabolism	Global and overview maps;Biosynthesis of other secondary metabolites	Alkaloids and derivatives	Plumeran-type alkaloids	Not Available	0	71.4	Biosynthesis of secondary metabolites;Indole alkaloid biosynthesis	Biosynthesis of secondary metabolites;Indole alkaloid biosynthesis	1.8767	1.8689	7.303e-06	2.661e-05	4.8237	5.1864	4.6691	4.84	4.4789	3.5738	3.5888	3.6078	3.6539	3.5835
neg_2204	Hordatine B	metab_9093	yes	C08308	neg	10502-21-3	601.285	4.3752	M+Na-2H	C29H40N8O5	0	52.5	HMDB0030459	-	-	-	-	-	Phenylpropanoids and polyketides	2-arylbenzofuran flavonoids	Not Available	0	52.5	-	-	1.2305	1.2315	0.0001742	0.0003514	5.6219	5.3552	5.4982	5.2132	5.3923	4.8212	4.9342	4.7743	5.0226	4.8207
neg_2211	Oripavine	metab_9100	yes	C06175	neg	467-04-9	318.109	4.39088	M+Na-2H	C18H19NO3	0	33.7	HMDB0030251	-	-	map00950;map01110	Metabolism;Metabolism	Biosynthesis of other secondary metabolites;Global and overview maps	Alkaloids and derivatives	Morphinans	Not Available	0	33.7	Isoquinoline alkaloid biosynthesis;Biosynthesis of secondary metabolites	Isoquinoline alkaloid biosynthesis;Biosynthesis of secondary metabolites	1.2615	1.2638	4.263e-05	0.0001079	5.2446	5.0131	5.1395	4.8902	4.9454	4.4332	4.4227	4.5029	4.5504	4.5306
neg_2241	Pinometostat	metab_9133	yes	-	neg	-	583.31	4.43005	M+Na-2H	C30H42N8O3	0	56.1	HMDB0256563	-	-	-	-	-	Nucleosides, nucleotides, and analogues	5''-deoxyribonucleosides	Not Available	0	56.1	-	-	1.6295	1.6202	1.531e-07	1.616e-06	6.0111	5.8869	6.0056	5.9164	6.0075	4.9283	5.1443	5.1225	5.1815	5.0451
neg_2301	Viloxazine	metab_9200	yes	-	neg	-	473.261	4.52827	2M-H	C13H19NO3	0	30.5	HMDB0259807	-	-	-	-	-	Benzenoids	Phenol ethers	Not Available	0	30.5	-	-	1.5843	1.5749	1.59e-05	4.89e-05	5.8817	5.7659	5.7814	5.6673	5.6774	4.7574	4.7732	4.9019	5.2212	4.8464
neg_2354	(-)-Salsoline	metab_9258	yes	C09640	neg	89-31-6;53622-84-7	431.215	4.6258	2M+FA-H	C11H15NO2	0	32.8	HMDB0003626;HMDB0012469	-	-	-	-	-	Organoheterocyclic compounds	Tetrahydroisoquinolines	Not Available	0	32.8	-	-	1.3914	1.3819	4.088e-06	1.691e-05	5.646	5.7836	5.509	5.548	5.5636	5.0349	4.8671	5.0286	4.9578	4.9015
neg_2547	Mofebutazone	metab_9470	yes	-	neg	-	267.091	5.00087	M+Cl	C13H16N2O2	0	33.1	HMDB0254828	-	-	-	-	-	Benzenoids	Benzene and substituted derivatives	Not Available	0	33.1	-	-	1.3187	1.3155	0.0001485	0.000307	3.4664	3.1615	3.1588	3.4312	3.1592	3.8422	4.0599	3.7096	3.9512	3.9003
neg_2635	PS(20:4(7E,9E,11Z,13E)-3OH(5S,6R,15S)/16:0)	metab_9568	yes	-	neg	-	868.442	5.14658	M+K-2H	C42H74NO13P	0	56.4	HMDB0281151	-	-	-	-	-	Not Available	Not Available	Not Available	0	56.4	-	-	1.6957	1.6898	1.521e-05	4.724e-05	7.0864	6.9759	6.8718	6.6106	6.6617	5.8006	5.7513	5.8689	6.0667	5.7933
neg_2645	Neotussilagine	metab_9579	yes	-	neg	147730-89-0	244.119	5.16818	M+FA-H	C10H17NO3	0	31.8	HMDB0031820	-	-	-	-	-	Organoheterocyclic compounds	Pyrrolizidines	Not Available	0	31.8	-	-	1.2778	1.284	7.718e-05	0.0001773	3.8914	4.2258	3.7686	4.0325	4.0345	4.5235	4.6264	4.559	4.6086	4.5568
neg_2659	Decarbamoylneosaxitoxin	metab_9594	yes	-	neg	68683-58-9	317.124	5.1912	M+FA-H	C9H16N6O4	0	32.6	HMDB0033663	-	-	-	-	-	Phenylpropanoids and polyketides	Saxitoxins, gonyautoxins, and derivatives	Not Available	0	32.6	-	-	1.73	1.7252	1.135e-06	6.214e-06	4.8485	4.907	4.9201	5.0191	4.9501	4.135	3.784	3.7439	3.9882	3.9724
neg_2823	PA(PGE1/a-13:0)	metab_9776	yes	-	neg	-	739.4	5.45648	M+Cl	C36H65O11P	0	55.6	HMDB0266888	-	-	-	-	-	Not Available	Not Available	Not Available	0	55.6	-	-	1.1661	1.158	2.475e-07	1.879e-06	6.9907	7.0375	6.912	6.9184	6.9293	6.5186	6.5111	6.513	6.539	6.4521
neg_2856	6-Hydroxy-8-methyl-8-azabicyclo[3.2.1]octan-3-yl 3-hydroxy-2-phenylpropanoate	metab_9812	yes	-	neg	-	350.161	5.51822	M+FA-H	C17H23NO4	0	34.9	HMDB0244793	-	-	-	-	-	Alkaloids and derivatives	Tropane alkaloids	Not Available	0	34.9	-	-	1.8525	1.8565	0.00224	0.00345	3.1093	4.3757	3.3103	3.1166	3.2999	5.1054	4.1486	4.5431	5.0686	5.1056
neg_2981	Combretastatin A4	metab_9949	yes	C20268	neg	117048-59-6	315.124	5.7857	M-H	C18H20O5	0	38.6	HMDB0250413;HMDB0253622	-	-	-	-	-	Phenylpropanoids and polyketides	Stilbenes	Not Available	0	38.6	-	-	1.5131	1.571	0.02714	0.03517	3.912	3.8663	4.0482	3.9927	3.6486	1.742	3.2123	3.2071	1.8209	3.8157
neg_3323	Adrenoylcarnitine	metab_10328	yes	-	neg	-	520.364	6.29697	M+FA-H	C29H49NO4	0	83.9	HMDB0242169	-	-	-	-	-	Not Available	Not Available	Not Available	0	83.9	-	-	1.7161	1.711	1.28e-09	1.373e-07	7.3251	7.223	7.2428	7.2146	7.336	6.3288	6.3424	6.2907	6.2435	6.2807
neg_3423	PC(TXB2/DiMe(13,5))	metab_10439	yes	-	neg	-	950.613	6.47633	M-H2O-H	C52H92NO13P	0	57.5	HMDB0289152	-	-	-	-	-	Not Available	Not Available	Not Available	0	57.5	-	-	1.0206	1.0108	2.962e-05	8.017e-05	6.8508	6.9078	6.8385	6.8772	6.8044	6.435	6.5317	6.5795	6.5659	6.3829
neg_3610	MG(0:0/18:1(12Z)-2OH(9,10)/0:0)	metab_10646	yes	-	neg	-	423.252	6.92162	M+Cl	C21H40O6	0	51.1	HMDB0260542	-	-	-	-	-	Not Available	Not Available	Not Available	0	51.1	-	-	1.0963	1.0839	0.03742	0.04748	5.3088	4.3056	5.4313	5.4904	5.5929	5.8038	5.8914	5.8203	5.7308	5.8228
neg_4356	Bafilomycin A1(Baf-A1)	metab_11470	yes	-	neg	-	621.401	6.54675	M-H	C35H58O9	0	38.9	HMDB0247559	-	-	-	-	-	Phenylpropanoids and polyketides	Macrolides and analogues	Not Available	0	38.9	-	-	1.0117	1.0048	2.855e-05	7.797e-05	7.5334	7.7362	7.5733	7.6743	7.69	7.2956	7.3322	7.2986	7.3023	7.2347
neg_4462	Deoxycholylisoleucine	metab_11588	yes	-	neg	-	504.369	6.4061	M-H	C30H51NO5	0	67	HMDB0242416	-	-	-	-	-	Not Available	Not Available	Not Available	0	67	-	-	2.2386	2.2211	2.281e-06	1.064e-05	6.2144	6.0315	6.1183	6.1116	6.2067	4.4783	4.6968	4.1619	4.8145	4.1376
neg_4565	N-Arachidonoyl Arginine	metab_11702	yes	-	neg	-	459.334	6.26595	M-H	C26H44N4O3	0	72.6	HMDB0241990	-	-	-	-	-	Not Available	Not Available	Not Available	0	72.6	-	-	1.3534	1.3571	1.376e-07	1.616e-06	4.8601	4.8556	4.8529	4.8674	4.8533	5.3639	5.4529	5.4738	5.5879	5.4757
neg_4608	Cholylisoleucine	metab_11750	yes	-	neg	-	520.364	6.20382	M-H	C30H51NO6	0	50.8	HMDB0242373	-	-	-	-	-	Not Available	Not Available	Not Available	0	50.8	-	-	1.7241	1.7079	9.351e-07	5.359e-06	6.3958	6.3953	6.2378	6.2991	6.3874	5.2809	5.4639	5.2475	5.5622	5.2261
neg_4621	Deoxycholylalanine	metab_11765	yes	-	neg	-	508.328	6.18057	M+FA-H	C27H45NO5	0	73.6	HMDB0242412	-	-	-	-	-	Not Available	Not Available	Not Available	0	73.6	-	-	2.6301	2.6008	0.0007269	0.001247	6.4504	6.4576	6.2866	6.3848	6.4937	4.5819	4.569	2.7248	4.8086	2.7006
neg_4653	MG(0:0/20:4(5Z,8Z,11Z,14Z)/0:0)	metab_11800	yes	C13856	neg	53847-30-6	423.275	6.14925	M+FA-H	C23H38O4	0	40.4	LMGL01010023;HMDB0004666	-	-	map04080;map04723;map04714	Environmental Information Processing;Organismal Systems;Organismal Systems	Signaling molecules and interaction;Nervous system;Environmental adaptation	Lipids and lipid-like molecules	Endocannabinoids	Not Available	0	40.4	Neuroactive ligand-receptor interaction;Retrograde endocannabinoid signaling;Thermogenesis	Neuroactive ligand-receptor interaction;Retrograde endocannabinoid signaling;Thermogenesis	1.0965	1.0866	6.864e-07	4.211e-06	6.9263	6.9645	6.8681	6.9042	6.8884	6.5043	6.5201	6.5297	6.5732	6.4298
neg_4712	PA(PGD1/8:0)	metab_11865	yes	-	neg	-	615.333	6.04047	M-H2O-H	C31H55O11P	0	66.8	HMDB0266682	-	-	-	-	-	Not Available	Not Available	Not Available	0	66.8	-	-	1.4959	1.4876	5.97e-08	1.616e-06	5.5769	5.3988	5.3688	5.4714	5.4299	4.6807	4.6958	4.7148	4.7609	4.6905
neg_4725	Cholylcitrulline	metab_11879	yes	-	neg	-	564.366	6.0272	M-H	C30H51N3O7	0	70.2	HMDB0242383	-	-	-	-	-	Not Available	Not Available	Not Available	0	70.2	-	-	1.3803	1.3521	0.0005611	0.0009923	5.5366	5.7544	5.3249	5.5979	5.7696	4.7515	4.8752	5.1603	5.1011	4.6952
neg_4882	Papaverrubine B	metab_12052	yes	-	neg	5140-39-6	384.149	5.91565	M-H	C21H23NO6	0	47.4	HMDB0030169	-	-	-	-	-	Alkaloids and derivatives	Rhoeadine alkaloids	Not Available	0	47.4	-	-	2.3464	2.383	0.04924	0.06135	0.0958	3.929	0.0638	0.0658	1.1247	5.1924	0.0376	3.9399	5.3664	5.4344
neg_4903	PI(20:4(5Z,8Z,11Z,14Z)-OH(19S)/16:1(9Z))	metab_12076	yes	-	neg	-	853.484	5.9	M-H2O-H	C45H77O14P	0	76.1	HMDB0276141	-	-	-	-	-	Not Available	Not Available	Not Available	0	76.1	-	-	1.814	1.8099	7.464e-06	2.702e-05	6.2314	5.9512	6.0039	5.5539	5.8825	4.7723	4.7874	4.8063	4.8525	4.7821
neg_4961	6-Hydroxyindoxyl sulfate	metab_12140	yes	-	neg	-	226.018	5.86867	M-H	C9H9NO4S	0	32.8	HMDB0304937	-	-	-	-	-	Not Available	Not Available	Not Available	0	32.8	-	-	1.3296	1.3218	2.725e-07	2e-06	4.7254	4.8508	4.7416	4.82	4.7563	4.204	4.1412	4.1162	4.2739	4.226
neg_5044	PA(18:1(12Z)-2OH(9,10)/14:1(9Z))	metab_12233	yes	-	neg	-	713.373	5.75437	M+K-2H	C35H65O10P	0	66	HMDB0263113	-	-	-	-	-	Not Available	Not Available	Not Available	0	66	-	-	1.4706	1.4621	2.642e-06	1.191e-05	6.5431	6.3678	6.4884	6.3658	6.4506	5.6636	5.6368	5.6685	5.9207	5.6924
neg_5115	(1xi,3xi)-1,2,3,4-Tetrahydro-1-methyl-beta-carboline-3-carboxylic acid	metab_12312	yes	-	neg	124863-39-4	275.104	5.65393	M+FA-H	C13H14N2O2	0	42.7	HMDB0031819;HMDB0037942	-	-	-	-	-	Alkaloids and derivatives	Harmala alkaloids	Not Available	0	42.7	-	-	1.1225	1.1201	2.123e-06	1.007e-05	5.6676	5.4903	5.5663	5.5004	5.5175	5.0861	5.113	5.1065	5.1689	5.1361
neg_5164	17-Dimethylaminogeldanamycin	metab_12366	yes	-	neg	-	615.337	5.5711	M-H	C32H48N4O8	0	81.8	HMDB0244766	-	-	-	-	-	Phenylpropanoids and polyketides	Macrolactams	Not Available	0	81.8	-	-	1.1501	1.1612	0.001128	0.001844	5.8655	5.4227	5.6759	5.4552	5.5396	4.9581	5.0403	5.0709	5.3181	5.0712
neg_5283	Exo,exo-1,8-Epoxy-p-menthane-2,6-diol	metab_12498	yes	C17620	neg	38223-98-2	231.123	5.39572	M+FA-H	C10H18O3	0	68.5	HMDB0041376	-	-	-	-	-	Organoheterocyclic compounds	Oxanes	Not Available	0	68.5	-	-	1.1749	1.169	0.0005216	0.0009275	3.4796	3.671	3.5998	3.3839	3.6971	2.9764	3.3308	2.9926	3.0387	2.9684
neg_5395	Arecoline	metab_12621	yes	C10129	neg	63-75-2	136.076	5.2363	M-H2O-H	C8H13NO2	0	39.4	HMDB0030353	-	-	-	-	-	Alkaloids and derivatives	Not Available	Not Available	0	39.4	-	-	1.0096	1.0437	0.002236	0.003444	3.7478	3.8652	3.7428	3.7911	3.8859	3.5571	3.4874	3.4889	3.0708	3.4152
neg_5409	Penitrem D	metab_12637	yes	C20596	neg	78213-64-6	602.305	5.21423	M+Cl	C37H45NO4	0	73.8	HMDB0256240;HMDB0242736	-	-	map00403	Metabolism	Biosynthesis of other secondary metabolites	Organoheterocyclic compounds	Naphthopyrans	Not Available	0	73.8	Indole diterpene alkaloid biosynthesis	Indole diterpene alkaloid biosynthesis	1.1611	1.1538	2.714e-05	7.499e-05	6.5262	6.4759	6.3989	6.3641	6.3511	5.9074	5.9785	5.935	6.1151	5.8704
neg_5482	Quinocarmycin analog	metab_12718	yes	-	neg	-	392.138	5.10147	M+Cl	C19H23N3O4	0	53	HMDB0251647	-	-	-	-	-	Organoheterocyclic compounds	Tetrahydroisoquinolines	Not Available	0	53	-	-	1.1561	1.1491	2.18e-06	1.027e-05	4.9619	4.9416	4.9766	5.0028	4.9534	4.5741	4.5422	4.4199	4.6062	4.4491
neg_5561	PG(LTE4/22:5(7Z,10Z,13Z,16Z,19Z))	metab_12806	yes	-	neg	-	1016.48	4.98267	M+K-2H	C51H82NO13PS	0	88.2	HMDB0270357	-	-	-	-	-	Not Available	Not Available	Not Available	0	88.2	-	-	2.0718	2.0523	0.0002402	0.0004657	5.8985	5.9398	5.6329	5.5572	5.6418	4.6663	3.7936	3.8125	4.8671	3.908
neg_5582	Senecionine N-oxide	metab_12829	yes	C15612	neg	-	372.142	4.95127	M+Na-2H	C18H25NO6	0	57	HMDB0258230	-	-	map00960	Metabolism	Biosynthesis of other secondary metabolites	Alkaloids and derivatives	Not Available	Not Available	0	57	Tropane, piperidine and pyridine alkaloid biosynthesis	Tropane, piperidine and pyridine alkaloid biosynthesis	1.5912	1.5892	4.355e-06	1.778e-05	3.7683	3.4289	3.4262	3.4407	3.4266	4.4108	4.4668	4.253	4.3577	4.2823
neg_5768	PG(i-12:0/PGE2)	metab_13034	yes	-	neg	-	799.385	4.641	M+K-2H	C38H67O13P	0	76.9	HMDB0271073	-	-	-	-	-	Not Available	Not Available	Not Available	0	76.9	-	-	1.502	1.4954	1.452e-05	4.557e-05	6.3579	6.2512	6.1608	6.0123	6.0643	5.3675	5.3013	5.3337	5.6091	5.3814
neg_5779	PI(20:4(8Z,11Z,14Z,17Z)/PGJ2)	metab_13046	yes	-	neg	-	973.449	4.6258	M+K-2H	C49H77O15P	0	91.1	HMDB0277619	-	-	-	-	-	Not Available	Not Available	Not Available	0	91.1	-	-	1.6388	1.6324	2.268e-05	6.512e-05	6.6696	6.5201	6.4174	6.2095	6.2547	5.5739	5.342	5.4711	5.6839	5.3806
neg_5900	3-((4-(5-(Hydroxymethyl)-2-oxo-3-oxazolidinyl)phenoxy)methyl)benzonitrile	metab_13182	yes	-	neg	-	693.22	4.45612	2M+FA-H	C18H16N2O4	0	60.8	HMDB0249397	-	-	-	-	-	Benzenoids	Phenol ethers	Not Available	0	60.8	-	-	1.2997	1.3008	0.000334	0.0006221	5.6424	5.396	5.6246	5.3692	5.4232	4.8298	4.8247	4.6414	5.1585	4.9294
neg_5927	Latrunculin B	metab_13211	yes	C19904	neg	76343-94-7	376.155	4.42223	M-H2O-H	C20H29NO5S	0	78.3	HMDB0253990	-	-	-	-	-	Phenylpropanoids and polyketides	Macrolides and analogues	Not Available	0	78.3	-	-	1.454	1.4577	0.0003006	0.0005661	5.0047	4.6169	4.8967	4.535	4.676	3.8413	3.979	3.8686	4.3294	3.8936
neg_6000	Dmean	metab_13293	yes	-	neg	-	872.401	4.32042	3M-H	C18H17N3O	0	55.8	HMDB0251537	-	-	-	-	-	Benzenoids	Naphthalenes	Not Available	0	55.8	-	-	1.4291	1.4195	4.169e-06	1.719e-05	6.6829	6.6716	6.5109	6.4454	6.4766	5.9054	5.8436	5.831	5.9938	5.7723
neg_6012	3,6-Ditigloyloxytropan-7-ol	metab_13306	yes	-	neg	7159-86-6	358.162	4.31257	M+Na-2H	C18H27NO5	0	31.9	HMDB0029325	-	-	-	-	-	Alkaloids and derivatives	Tropane alkaloids	Not Available	0	31.9	-	-	1.3368	1.3336	1.561e-06	8.035e-06	5.4781	5.5429	5.6142	5.6246	5.7557	5.0272	5.0338	4.972	4.9897	4.9996
neg_6114	Tripdiolide	metab_13419	yes	C09202	neg	38647-10-8	413.102	4.17083	M+K-2H	C20H24O7	0	50.6	HMDB0259259	-	-	-	-	-	Organoheterocyclic compounds	Oxepanes	Not Available	0	50.6	-	-	1.1401	1.1502	0.0009697	0.001608	4.6778	4.8077	4.6634	4.962	5.0369	4.4726	4.4668	4.1713	4.2503	4.3675
neg_6283	Orotidine	metab_13603	yes	C01103	neg	314-50-1	325.007	3.98935	M+K-2H	C10H12N2O8	0	55.5	HMDB0000788	-	-	map00240;map01100;map01240	Metabolism;Metabolism;Metabolism	Nucleotide metabolism;Global and overview maps;Global and overview maps	Nucleosides, nucleotides, and analogues	Pyrimidine nucleosides	Not Available	0	55.5	Pyrimidine metabolism;Metabolic pathways;Biosynthesis of cofactors	Pyrimidine metabolism;Metabolic pathways;Biosynthesis of cofactors	1.3177	1.3177	0.001231	0.001995	4.0404	3.5627	4.1181	3.5167	4.1084	3.1994	3.222	3.1963	3.2425	3.1721
neg_6296	PC(20:5(7Z,9Z,11E,13E,17Z)-3OH(5,6,15)/2:0)	metab_13617	yes	-	neg	-	630.31	3.96585	M-H	C30H50NO11P	0	75.1	HMDB0288873	-	-	-	-	-	Not Available	Not Available	Not Available	0	75.1	-	-	1.1634	1.1587	1.521e-06	7.886e-06	6.1382	6.0427	6.0853	6.0127	6.0004	5.5561	5.5987	5.5718	5.7012	5.5765
neg_6399	Batatasin IV	metab_13731	yes	C10247	neg	60347-67-3	487.217	3.86412	2M-H	C15H16O3	0	35.1	LMPK13090032;HMDB0032641	-	-	-	-	-	Phenylpropanoids and polyketides	Stilbenes	Not Available	0	35.1	-	-	1.2697	1.2632	8.17e-07	4.839e-06	5.5724	5.6099	5.4756	5.6356	5.4865	4.9539	5.0549	4.9712	5.0669	5.0396
neg_6440	DG(5-iso PGF2VI/2:0/0:0)	metab_13778	yes	-	neg	-	487.252	3.82435	M+FA-H	C23H38O8	0	55.3	HMDB0296944	-	-	-	-	-	Not Available	Not Available	Not Available	0	55.3	-	-	1.6899	1.6892	8.474e-06	2.969e-05	4.6691	4.3723	4.6166	4.3573	4.8723	5.5221	5.5566	5.5446	5.5471	5.5977
neg_6443	Camonagrel	metab_13781	yes	-	neg	-	307.086	3.82435	M+Cl	C15H16N2O3	0	32.7	HMDB0249574	-	-	-	-	-	Benzenoids	Indanes	Not Available	0	32.7	-	-	1.6955	1.6788	2.122e-05	6.164e-05	3.5617	3.2482	3.5633	3.7016	3.5628	4.6141	4.6826	4.5374	4.2068	4.4922
neg_649	MG(20:4(5Z,7E,11Z,14Z)-OH(9)/0:0/0:0)	metab_13832	yes	-	neg	-	439.27	5.95487	M+FA-H, 2M+Hac-H	C23H38O5	0	42.7	HMDB0260476	-	-	-	-	-	Not Available	Not Available	Not Available	0	42.7	-	-	1.0954	1.0898	3.993e-07	2.718e-06	5.1174	5.1387	5.033	5.1032	5.0907	4.7453	4.6951	4.7371	4.6714	4.639
neg_6607	2-Hydroxy-3-methoxy-6beta-naltrexol	metab_13962	yes	-	neg	-	394.161	3.6428	M+Na-2H	C21H27NO5	0	35.4	HMDB0245144	-	-	-	-	-	Benzenoids	Phenanthrenes and derivatives	Not Available	0	35.4	-	-	1.2198	1.2183	3.791e-05	9.816e-05	5.4404	5.2992	5.3375	5.2347	5.2156	4.619	4.7418	4.8109	4.8777	4.8842
neg_6657	PGP(a-13:0/PGF1alpha)	metab_14017	yes	-	neg	-	897.395	3.58797	M+K-2H	C39H74O16P2	0	54	HMDB0274362	-	-	-	-	-	Not Available	Not Available	Not Available	0	54	-	-	1.5635	1.5533	1.568e-08	8.332e-07	5.8635	5.9634	5.9333	5.9222	6.0621	5.1178	5.1329	5.1519	5.198	5.1276
neg_6730	Abeado	metab_14099	yes	-	neg	-	330.167	3.51745	M-H2O-H	C15H23N7O3	0	56.3	HMDB0247746	-	-	-	-	-	Nucleosides, nucleotides, and analogues	5''-deoxyribonucleosides	Not Available	0	56.3	-	-	1.0193	1.0133	8.568e-06	2.991e-05	6.4543	6.3656	6.4572	6.3955	6.4369	6.0149	6.0139	6.0612	6.1806	6.0766
neg_6780	Salutaridinol	metab_14153	yes	C05220	neg	3271-79-2	350.136	3.46995	M+Na-2H	C19H23NO4	0	49	HMDB0304480	-	-	map00950;map01100;map01110;map01063	Metabolism;Metabolism;Metabolism;Metabolism	Biosynthesis of other secondary metabolites;Global and overview maps;Global and overview maps;Chemical structure transformation maps	Benzenoids	Phenanthrenes and derivatives	Not Available	0	49	Isoquinoline alkaloid biosynthesis;Metabolic pathways;Biosynthesis of secondary metabolites;Biosynthesis of alkaloids derived from shikimate pathway	Isoquinoline alkaloid biosynthesis;Metabolic pathways;Biosynthesis of secondary metabolites;Biosynthesis of alkaloids derived from shikimate pathway	1.0441	1.0414	3.513e-05	9.25e-05	5.7862	5.6541	5.6546	5.5788	5.6159	5.2252	5.2382	5.2946	5.389	5.26
neg_6865	7-Acetyllycopsamine	metab_14247	yes	C16751	neg	-	378.134	3.39097	M+K-2H	C17H27NO6	0	42.8	HMDB0302356	-	-	-	-	-	Alkaloids and derivatives	Not Available	Not Available	0	42.8	-	-	1.1542	1.1482	2.034e-06	9.737e-06	5.45	5.4539	5.4521	5.3911	5.4236	4.9002	4.9622	4.9308	5.0754	5.061
neg_6970	7-Methylguanosine	metab_14364	yes	-	neg	2140-77-4;20244-86-4	335.065	3.30417	M+K-2H	C11H16N5O5+	0	30.6	HMDB0001107;HMDB0005862	-	-	-	-	-	Nucleosides, nucleotides, and analogues	Purine nucleosides	Not Available	0	30.6	-	-	1.4432	1.4317	0.0002865	0.0005429	4.4996	4.5555	4.349	4.7346	4.8223	3.7749	3.9693	3.5372	3.9579	4.0059
neg_7160	Imidazoleacetic acid ribotide	metab_14575	yes	C04437	neg	2888-19-9	337.044	2.65393	M-H	C10H15N2O9P	0	44.8	HMDB0006032	-	-	map00340	Metabolism	Amino acid metabolism	Nucleosides, nucleotides, and analogues	Purine nucleosides	Not Available	0	44.8	Histidine metabolism	Histidine metabolism	1.4674	1.4841	0.001165	0.001896	4.8553	5.26	4.273	4.51	4.7403	5.509	5.4716	5.6122	5.6427	5.5699
neg_1509	Chloramphenicol palmitate	metab_8322	yes	C11726	neg	530-43-8	605.244	3.43075	M+FA-H	C27H42Cl2N2O6	0	40.3	HMDB0250087	-	-	-	-	-	Benzenoids	Benzene and substituted derivatives	Nitrobenzenes	0	40.3	-	-	1.2229	1.2234	9.175e-05	0.0002055	6.2243	6.0834	5.9914	5.8448	5.8786	5.3915	5.468	5.4825	5.4733	5.55
pos_3002	Melanettin	metab_2212	yes	C10504	pos	58115-08-5	302.102	4.97775	M+NH4	C16H12O5	0	61	HMDB0041758	-	-	-	-	-	Phenylpropanoids and polyketides	Neoflavonoids	Neoflavones	0	61	-	-	1.4926	1.4781	0.002475	0.005388	3.5227	4.1366	3.8978	4.334	3.6732	4.6598	4.6162	4.4571	4.5549	4.5696
pos_1323	Stallimycin	metab_360	yes	-	pos	-	482.228	6.06733	M+H-H2O, M+H	C22H27N9O4	0	56.5	HMDB0251483	-	-	-	-	-	Organic nitrogen compounds	Organonitrogen compounds	N-arylamides	0	56.5	-	-	1.8332	1.8211	5.252e-07	1.597e-05	4.997	4.9169	4.8458	4.8079	4.7087	4.0966	3.9259	4.0541	3.9672	3.9299
neg_2071	7-Amino-4-hydroxy-2-naphthalenesulfonic acid	metab_8945	yes	-	neg	-	284.023	4.15515	M+FA-H	C10H9NO4S	0	49.4	HMDB0243485	-	-	-	-	-	Benzenoids	Naphthalenes	Naphthalene sulfonic acids and derivatives	0	49.4	-	-	1.1944	1.2366	0.001595	0.002528	4.225	4.5711	4.3225	4.3891	4.4651	3.8673	3.9641	3.7999	3.4757	4.0888
neg_5695	N-(3-acetamidopropyl)pyrrolidin-2-one	metab_12953	yes	-	neg	106692-36-8	427.256	4.76547	2M+Hac-H	C9H16N2O2	0	63.1	HMDB0061384	-	-	-	-	-	Organoheterocyclic compounds	Pyrrolidines	N-alkylpyrrolidines	0	63.1	-	-	1.0667	1.0699	0.0003163	0.0005929	6.5127	6.3441	6.3532	6.196	6.2516	5.8474	5.8312	5.9353	6.0678	5.9182
pos_6001	Dihydroferuperine	metab_5509	yes	-	pos	77795-17-6	642.346	4.23732	2M+ACN+Na	C17H23NO3	0	42.2	HMDB0040700	-	-	-	-	-	Organoheterocyclic compounds	Piperidines	N-acylpiperidines	0	42.2	-	-	1.111	1.0949	0.00137	0.003261	6.0928	5.8711	6.1742	6.2288	6.235	5.7865	5.7528	5.6601	5.8508	5.7768
neg_3107	11b-Hydroxyandrost-4-ene-3,17-dione	metab_15360	yes	C05284	neg	382-44-5	347.186	5.93142	M+FA-H	C19H26O3	0	77.3	PW_C002924;HMDB0006773	-	-	map00140	Metabolism	Lipid metabolism	Organoheterocyclic compounds	Oxazinanes	Morpholines	0	77.3	Steroid hormone biosynthesis	Steroid hormone biosynthesis	1.9568	1.9491	4.948e-06	1.968e-05	4.9158	4.5054	4.452	4.3941	4.5255	3.535	3.2766	3.1191	3.2647	3.0949
pos_3300	Kahweol	metab_2540	yes	C09893	pos	6894-43-5	315.195	5.8918	M+H	C20H26O3	48.7	0	HMDB0035602	-	-	map01110;map00902	Metabolism;Metabolism	Global and overview maps;Metabolism of terpenoids and polyketides	Lipids and lipid-like molecules	Prenol lipids	Monoterpenoids	48.7	0	Biosynthesis of secondary metabolites;Monoterpenoid biosynthesis	Biosynthesis of secondary metabolites;Monoterpenoid biosynthesis	1.7278	1.742	4.152e-05	0.0001965	4.3159	4.3771	4.3292	4.3587	4.4365	3.5009	3.6224	3.4903	3.3222	3.903
pos_4619	Dolichodial	metab_3987	yes	C09777	pos	5951-57-5	149.096	6.46443	M+H-H2O	C10H14O2	0	42.7	HMDB0251578;LMPR0102070037	-	-	-	-	-	Lipids and lipid-like molecules	Prenol lipids	Monoterpenoids	0	42.7	-	-	1.0944	1.0888	9.002e-08	5.15e-06	5.7702	5.8397	5.8067	5.8437	5.8163	5.5482	5.4853	5.5136	5.5032	5.5119
pos_4970	Eucarvone	metab_4373	yes	C16955	pos	503-93-5	151.112	6.08332	M+H	C10H14O	0	54.5	HMDB0302916	-	-	-	-	-	Lipids and lipid-like molecules	Prenol lipids	Monoterpenoids	0	54.5	-	-	1.0376	1.0371	5.245e-05	0.0002357	4.5172	4.5711	4.5319	4.5538	4.568	4.2608	4.3916	4.2617	4.196	4.2026
pos_6322	Myrigalone A	metab_5865	yes	-	pos	34328-57-9	642.31	3.68943	2M+ACN+H	C18H20O4	0	32.7	HMDB0037245	-	-	-	-	-	Lipids and lipid-like molecules	Prenol lipids	Monoterpenoids	0	32.7	-	-	1.6781	1.6623	7.901e-06	5.436e-05	6.0929	5.909	6.0375	5.9305	6.0003	5.109	5.2386	5.1905	5.491	5.2841
neg_1335	(+)-Bornyl diphosphate	metab_8129	yes	C03190	neg	64822-87-3	295.049	3.24877	M-H2O-H	C10H20O7P2	0	40.7	HMDB0301814	-	-	map01100;map01110;map00902;map01062	Metabolism;Metabolism;Metabolism;Metabolism	Global and overview maps;Global and overview maps;Metabolism of terpenoids and polyketides;Chemical structure transformation maps	Lipids and lipid-like molecules	Prenol lipids	Monoterpenoids	0	40.7	Metabolic pathways;Biosynthesis of secondary metabolites;Monoterpenoid biosynthesis;Biosynthesis of terpenoids and steroids	Metabolic pathways;Biosynthesis of secondary metabolites;Monoterpenoid biosynthesis;Biosynthesis of terpenoids and steroids	1.2096	1.1923	0.0007831	0.001331	4.0033	4.1451	4.0373	4.0147	3.6998	4.4378	4.5851	4.7184	4.3028	4.5299
neg_2742	Valtrate	metab_9686	yes	C09801	neg	18296-44-1	233.043	5.32122	M+Na-2H	C10H12O5	0	64	HMDB0034493	-	-	-	-	-	Lipids and lipid-like molecules	Prenol lipids	Monoterpenoids	0	64	-	-	1.2098	1.2322	0.007473	0.01054	3.9693	3.4126	3.7949	3.0039	3.2549	2.7977	2.9445	2.8382	2.8115	2.8797
pos_274	MG(22:5(7Z,10Z,13Z,16Z,19Z)/0:0/0:0)	metab_1921	yes	-	pos	-	405.3	6.5361	M+NH4, M+Na, M+H	C25H40O4	0	47.2	HMDB0011586	-	-	-	-	-	Lipids and lipid-like molecules	Glycerolipids	Monoradylglycerols	0	47.2	-	-	1.336	1.3211	0.01352	0.02319	4.8717	4.814	4.9812	4.2108	4.9878	4.6602	4.051	4.0446	4.0923	4.055
pos_4410	MG(0:0/22:1(13Z)/0:0)	metab_3757	yes	-	pos	-	435.346	6.79055	M+Na	C25H48O4	0	42.3	HMDB0011552	-	-	-	-	-	Lipids and lipid-like molecules	Glycerolipids	Monoradylglycerols	0	42.3	-	-	2.4056	2.43	0.0003492	0.001057	3.9686	2.843	2.8522	2.8718	3.9057	5.0671	4.8935	4.6852	4.8757	5.0408
pos_5279	MG(0:0/i-18:0/0:0)	metab_4712	yes	-	pos	-	397.269	5.72348	M+K	C21H42O4	0	67.2	HMDB0072877	-	-	-	-	-	Lipids and lipid-like molecules	Glycerolipids	Monoradylglycerols	0	67.2	-	-	3.0906	3.0738	9.038e-08	5.15e-06	1.1088	1.1052	1.1137	1.1318	1.1292	3.2686	3.1764	3.6511	3.8615	3.7316
neg_4708	MG(20:5(5Z,8Z,11Z,14Z,17Z)/0:0/0:0)	metab_11860	yes	-	neg	-	421.26	6.04828	M+FA-H	C23H36O4	0	44.5	HMDB0011580	-	-	-	-	-	Lipids and lipid-like molecules	Glycerolipids	Monoradylglycerols	0	44.5	-	-	2.0619	2.0559	4.396e-08	1.578e-06	5.9632	5.9354	5.7803	5.7895	5.6951	4.3743	4.6183	4.3588	4.405	4.3486
pos_1137	Milbemycin beta3	metab_154	yes	-	pos	-	536.337	6.50427	M+CH3OH+H, M+ACN+H	C31H42O5	0	30.6	HMDB0254721;HMDB0254729;HMDB0242623;HMDB0254730	-	-	-	-	-	Phenylpropanoids and polyketides	Macrolides and analogues	Milbemycins	0	30.6	-	-	1.461	1.4686	0.006662	0.01255	5.6314	5.6051	5.6023	5.7832	5.6975	5.996	6.5877	6.6576	5.7986	6.6265
pos_4839	Milbemycin beta1	metab_4227	yes	-	pos	-	586.373	6.2027	M+ACN+H	C32H48O7	0	46.9	HMDB0254721;HMDB0254727;HMDB0242623;HMDB0254730	-	-	-	-	-	Phenylpropanoids and polyketides	Macrolides and analogues	Milbemycins	0	46.9	-	-	1.022	1.0066	0.000217	0.0007158	5.6293	5.4457	5.5925	5.6082	5.6776	5.2487	5.3503	5.3103	5.3578	5.2723
pos_1554	4-Deoxypyridoxine	metab_616	yes	-	pos	-	195.113	2.78778	M+NH4, M+ACN+H	C8H11NO2	0	38.5	HMDB0246408	-	-	-	-	-	Organoheterocyclic compounds	Pyridines and derivatives	Methylpyridines	0	38.5	-	-	1.6035	1.5909	1.34e-05	8.195e-05	4.4136	4.693	4.7762	4.463	4.6645	5.2673	5.3308	5.2345	5.2768	5.2635
pos_141	[6]-Gingerdione	metab_456	yes	C10459	pos	61871-71-4	275.164	6.08332	M+H-H2O, M+H, M+H-2H2O	C17H24O4	0	61.8	HMDB0039275	-	-	-	-	-	Benzenoids	Phenols	Methoxyphenols	0	61.8	-	-	1.2874	1.2734	7.264e-06	5.099e-05	5.8117	5.9549	5.846	5.9426	5.8731	5.4789	5.4498	5.4533	5.5517	5.3552
pos_7281	Coniferyl acetate	metab_6920	yes	C20225	pos	-	267.058	1.78957	M+2Na-H	C12H14O4	0	33.6	HMDB0304294	-	-	map00940	Metabolism	Biosynthesis of other secondary metabolites	Benzenoids	Phenols	Methoxyphenols	0	33.6	Phenylpropanoid biosynthesis	Phenylpropanoid biosynthesis	1.0778	1.0711	0.02583	0.04053	3.7089	3.705	3.7142	3.7338	3.731	4.2551	3.753	4.6514	3.9171	4.1206
neg_5121	4-[(E)-5,6-Dihydro-2,3'-bipyridin-3(4H)-ylidenemethyl]-3-methoxyphenol	metab_12319	yes	-	neg	-	587.272	5.63922	2M-H	C18H18N2O2	0	41.6	HMDB0246319	-	-	-	-	-	Benzenoids	Phenols	Methoxyphenols	0	41.6	-	-	1.3204	1.3206	0.0002896	0.0005479	3.7497	3.6638	3.8385	4.1632	4.1434	4.5345	4.4902	4.5883	4.5321	4.5939
pos_6602	Midodrine	metab_6174	yes	C07890	pos	133163-28-7;42794-76-3	526.287	3.27318	2M+NH4	C12H18N2O4	0	47.5	HMDB0014356	-	-	-	-	-	Benzenoids	Benzene and substituted derivatives	Methoxybenzenes	0	47.5	-	-	2.2621	2.238	0.0001792	0.0006141	6.0942	5.8488	5.9233	5.6294	5.8427	4.4151	4.6888	4.5614	4.9694	3.7809
neg_5161	Achimilic acid	metab_12363	yes	-	neg	110732-04-2	299.088	5.57748	M+Na-2H	C15H18O5	0	31.5	HMDB0037325	-	-	-	-	-	Organic acids and derivatives	Keto acids and derivatives	Medium-chain keto acids and derivatives	0	31.5	-	-	1.1372	1.135	3.87e-06	1.614e-05	6.0023	5.7884	5.8672	5.8428	5.8522	5.3894	5.4039	5.4169	5.4619	5.4815
neg_5905	Phaseolic acid	metab_13187	yes	C10483	neg	29533-15-1;53755-04-7	261.134	4.45612	M-H	C12H22O6	0	58	LMFA01060200;HMDB0031897	-	-	-	-	-	Organic acids and derivatives	Keto acids and derivatives	Medium-chain keto acids and derivatives	0	58	-	-	1.32	1.3287	0.0001975	0.0003914	3.5839	3.2278	3.4641	3.2612	3.1922	2.6119	2.6122	2.8004	2.6014	2.9126
pos_3070	3-(5'-methylthio)pentylmalate	metab_2287	yes	C17223	pos	-	266.107	5.18575	M+NH4	C10H16O5S-2	0	50.3	HMDB0304110	-	-	map01210;map00966	Metabolism;Metabolism	Global and overview maps;Biosynthesis of other secondary metabolites	Organic acids and derivatives	Hydroxy acids and derivatives	Medium-chain hydroxy acids and derivatives	0	50.3	2-Oxocarboxylic acid metabolism;Glucosinolate biosynthesis	2-Oxocarboxylic acid metabolism;Glucosinolate biosynthesis	1.2277	1.2337	0.00377	0.007786	3.2392	3.6829	3.2445	3.6637	3.5428	4.031	3.9772	3.7983	3.7963	4.0837
neg_2653	3-Hydroxysebacic Acid	metab_9588	yes	-	neg	446881-43-2	217.108	5.18383	M-H	C10H18O5	44.8	0	HMDB0000350	-	-	-	-	-	Organic acids and derivatives	Hydroxy acids and derivatives	Medium-chain hydroxy acids and derivatives	44.8	0	-	-	1.2562	1.254	7.787e-09	5.365e-07	4.7652	4.8019	4.8231	4.807	4.8676	4.2965	4.2884	4.258	4.2778	4.3368
neg_4920	Pravastatin	metab_12095	yes	C01844	neg	81093-37-0	405.224	5.89217	M-H2O-H	C23H36O7	0	42.3	HMDB0005022;LMFA05000695;HMDB0256737;PW_C002369;MJDBOTE0001592	-	-	map04976	Organismal Systems	Digestive system	Organic acids and derivatives	Hydroxy acids and derivatives	Medium-chain hydroxy acids and derivatives	0	42.3	Bile secretion	Bile secretion	1.122	1.1162	2.886e-05	7.862e-05	6.7202	6.6946	6.6385	6.5794	6.5594	6.1303	6.153	6.2015	6.3595	6.1853
neg_2928	Ergobasin	metab_9892	yes	C07543	neg	60-79-7	649.357	5.66178	2M-H	C19H23N3O2	0	59.5	HMDB0251905;HMDB0015383	-	-	-	-	-	Alkaloids and derivatives	Ergoline and derivatives	Lysergic acids and derivatives	0	59.5	-	-	1.0409	1.0336	0.000394	0.000721	5.7365	5.5935	5.5301	5.5681	5.5483	5.1003	5.2309	5.3766	5.2487	5.0629
neg_3090	Ergosine	metab_10071	yes	C09167	neg	561-94-4	568.256	5.90783	M+Na-2H	C30H37N5O5	0	70.3	HMDB0251913	-	-	-	-	-	Alkaloids and derivatives	Ergoline and derivatives	Lysergic acids and derivatives	0	70.3	-	-	1.7637	1.7473	9.848e-05	0.0002176	5.5256	5.5713	5.5213	5.5551	5.4438	3.9183	4.5042	4.6508	4.7869	4.3288
neg_4070	Ergocornine	metab_11154	yes	C09162	neg	564-36-3	582.272	7.45235	M+Na-2H	C31H39N5O5	0	70.3	HMDB0251906	-	-	-	-	-	Alkaloids and derivatives	Ergoline and derivatives	Lysergic acids and derivatives	0	70.3	-	-	1.4595	1.4513	3.049e-05	8.218e-05	5.6734	5.6	5.9663	5.9558	6.0205	6.5568	6.5856	6.5946	6.5279	6.6292
neg_6814	Lipoamide	metab_14191	yes	C00248	neg	940-69-2	186.04	3.43858	M-H2O-H	C8H15NOS2	0	44.3	HMDB0000962;LMFA08010006;HMDB0304823;PW_C000769	-	-	-	-	-	Organoheterocyclic compounds	Dithiolanes	Lipoamides	0	44.3	-	-	1.2259	1.2223	0.000969	0.001607	3.1854	3.6981	3.1783	3.3008	3.1786	3.9981	3.9045	3.7346	3.787	3.943
pos_1353	10-Nitrolinoleic acid	metab_393	yes	C13800	pos	774603-04-2	358.258	5.99563	M+H-H2O, M+CH3OH+H	C18H31NO4	0	54	LMFA01120001;HMDB0005049	-	-	-	-	-	Lipids and lipid-like molecules	Fatty Acyls	Lineolic acids and derivatives	0	54	-	-	1.9036	1.8994	3.463e-06	4.363e-05	4.8082	5.164	4.8719	5.108	5.0373	4.0442	4.2393	4.0684	4.0191	3.9618
pos_3082	7-Epijasmonic acid	metab_2300	yes	C16317	pos	-	252.159	5.24177	M+ACN+H	C12H18O3	0	73.3	HMDB0303804	-	-	map01100;map00592;map01110	Metabolism;Metabolism;Metabolism	Global and overview maps;Lipid metabolism;Global and overview maps	Lipids and lipid-like molecules	Fatty Acyls	Lineolic acids and derivatives	0	73.3	Metabolic pathways;alpha-Linolenic acid metabolism;Biosynthesis of secondary metabolites	Metabolic pathways;alpha-Linolenic acid metabolism;Biosynthesis of secondary metabolites	1.8815	1.8686	3.36e-05	0.0001673	3.2116	3.6718	3.1239	3.6318	3.437	4.4136	4.4246	4.3618	4.2788	4.2983
pos_5611	Jasmonic acid	metab_5077	yes	C08491	pos	6894-38-8;59366-47-1	252.159	5.03375	M+ACN+H	C12H18O3	0	77.5	HMDB0032797;LMFA02020001	-	-	map01100;map01110;map00592;map01070;map04075;map01060	Metabolism;Metabolism;Metabolism;Metabolism;Environmental Information Processing;Metabolism	Global and overview maps;Global and overview maps;Lipid metabolism;Chemical structure transformation maps;Signal transduction;Chemical structure transformation maps	Lipids and lipid-like molecules	Fatty Acyls	Lineolic acids and derivatives	0	77.5	Metabolic pathways;Biosynthesis of secondary metabolites;alpha-Linolenic acid metabolism;Biosynthesis of plant hormones;Plant hormone signal transduction;Biosynthesis of plant secondary metabolites	Metabolic pathways;Biosynthesis of secondary metabolites;alpha-Linolenic acid metabolism;Biosynthesis of plant hormones;Plant hormone signal transduction;Biosynthesis of plant secondary metabolites	2.4928	2.4728	2.274e-10	6.743e-08	2.7204	2.9038	2.8701	2.7452	2.8294	4.3517	4.4476	4.3775	4.3395	4.3468
neg_7125	Dihydrojasmonic acid	metab_14536	yes	-	neg	98674-52-3	469.278	3.09145	2M+FA-H	C12H20O3	0	42.8	HMDB0033601	-	-	-	-	-	Lipids and lipid-like molecules	Fatty Acyls	Lineolic acids and derivatives	0	42.8	-	-	1.5464	1.5384	4.366e-06	1.778e-05	6.1576	5.9329	6.056	5.9354	5.9788	5.1009	5.1235	5.2106	5.435	5.1569
pos_1383	Tilisolol	metab_426	yes	-	pos	-	305.186	5.57107	M+H, M+Na	C17H24N2O3	0	32.5	HMDB0259093	-	-	-	-	-	Organoheterocyclic compounds	Isoquinolines and derivatives	Isoquinolones and derivatives	0	32.5	-	-	1.1418	1.1303	1.101e-05	7.024e-05	5.3165	5.3586	5.3566	5.2858	5.4007	5.099	4.9423	4.9584	4.9839	5.0429
pos_4954	3-Butylidene-1(3H)-isobenzofuranone	metab_4355	yes	C16924	pos	551-08-6	189.091	6.09132	M+H	C12H12O2	0	49.7	HMDB0032061;HMDB0302263	-	-	-	-	-	Organoheterocyclic compounds	Isocoumarans	Isobenzofuranones	0	49.7	-	-	1.3199	1.3107	2.17e-07	9.259e-06	4.822	4.9076	4.8346	4.9211	4.9065	4.4177	4.4952	4.4414	4.4474	4.3877
neg_4793	3-Methyl-2-(3-pyridyl)-1-indoleoctanoic acid	metab_11954	yes	-	neg	-	387.148	5.9627	M+K-2H	C22H26N2O2	0	36.7	HMDB0249870	-	-	-	-	-	Organoheterocyclic compounds	Indoles and derivatives	Indolyl carboxylic acids and derivatives	0	36.7	-	-	1.1344	1.1157	0.003517	0.005229	4.9212	4.9317	4.7924	5.1471	4.837	4.3058	4.4066	4.535	4.7588	4.1344
neg_5219	Indolelactic acid	metab_12427	yes	C02043	neg	7417-65-4	204.066	5.4947	M-H	C11H11NO3	95.4	0	HMDB0000671	-	-	-	-	-	Organoheterocyclic compounds	Indoles and derivatives	Indolyl carboxylic acids and derivatives	95.4	0	-	-	1.0852	1.0881	0.0001396	0.0002915	5.1053	4.7779	4.9719	4.8542	4.8459	4.4216	4.5189	4.5042	4.5491	4.4514
neg_6308	Etodolac	metab_13631	yes	C06991	neg	41340-25-4	308.125	3.95802	M+Na-2H	C17H21NO3	0	42.8	PW_C009220;HMDB0014887;MJDBOTE0001379	-	-	-	-	-	Organoheterocyclic compounds	Indoles and derivatives	Indolyl carboxylic acids and derivatives	0	42.8	-	-	1.7858	1.7716	2.005e-07	1.616e-06	5.428	5.4113	5.2356	5.271	5.368	4.3496	4.3495	4.2381	4.3965	4.1078
pos_1664	Pindolol	metab_737	yes	C07445	pos	13523-86-9	287.117	1.28652	M+K, M+ACN+Na	C14H20N2O2	0	40.7	HMDB0015095;PW_C009401;MJDBOTE0000319	-	-	-	-	-	Organoheterocyclic compounds	Indoles and derivatives	Indoles	0	40.7	-	-	1.1317	1.1231	3.787e-06	4.363e-05	6.6421	6.5615	6.5876	6.5244	6.5305	6.2158	6.1923	6.232	6.3147	6.2334
pos_2313	3-Indolebutyric acid	metab_1452	yes	C11284	pos	133-32-4	236.128	3.18545	M+CH3OH+H	C12H13NO2	0	46.7	HMDB0002096	-	-	-	-	-	Organoheterocyclic compounds	Indoles and derivatives	Indoles	0	46.7	-	-	1.0673	1.0556	0.01741	0.02895	3.7658	3.2091	3.7756	3.5606	3.8331	3.1165	3.4426	3.1002	3.2527	3.2828
pos_2669	1H-Indol-3-amine	metab_1843	yes	C01819	pos	-	165.102	4.01132	M+CH3OH+H	C8H8N2	0	35.1	HMDB0244887	-	-	-	-	-	Organoheterocyclic compounds	Indoles and derivatives	Indoles	0	35.1	-	-	1.0886	1.0927	0.0009525	0.002406	3.2549	3.2459	3.2108	3.4052	3.5477	3.7038	3.7453	3.718	3.6379	3.6018
pos_5114	2-(5-Methoxy-1H-indol-3-yl)ethyl acetate	metab_4531	yes	-	pos	-	484.244	5.9558	2M+NH4	C13H15NO3	0	31.2	HMDB0247825	-	-	-	-	-	Organoheterocyclic compounds	Indoles and derivatives	Indoles	0	31.2	-	-	2.0267	2.0065	2.905e-09	5.942e-07	4.7377	4.7976	4.773	4.6796	4.8963	3.7485	3.7385	3.7321	3.7798	3.7425
pos_623	Indole-3-Acetamide	metab_5762	yes	C02693	pos	879-37-8	175.087	3.93063	M+H-H2O, M+H	C10H10N2O	82.9	0	HMDB0029739;MJDBOTE0000522	-	-	map01100;map00380	Metabolism;Metabolism	Global and overview maps;Amino acid metabolism	Organoheterocyclic compounds	Indoles and derivatives	Indoles	82.9	0	Metabolic pathways;Tryptophan metabolism	Metabolic pathways;Tryptophan metabolism	1.3482	1.3361	0.0001677	0.0005859	3.5823	3.6894	3.4632	3.892	3.6017	4.1834	4.1675	4.1074	4.0681	4.1732
neg_6522	Zolmitriptan N-Oxide	metab_13868	yes	-	neg	-	348.159	3.72968	M+FA-H	C16H21N3O3	0	55.6	HMDB0259433	-	-	-	-	-	Organoheterocyclic compounds	Indoles and derivatives	Indoles	0	55.6	-	-	1.1337	1.1307	2.172e-05	6.276e-05	5.7097	5.6204	5.5856	5.5477	5.49	5.1231	5.0295	5.1586	5.2306	5.1937
neg_7149	Indole-3-glycol aldehyde	metab_14562	yes	C03230	neg	-	349.118	2.83418	2M-H	C10H9NO2	0	35.3	HMDB0304393	-	-	map01100;map00380	Metabolism;Metabolism	Global and overview maps;Amino acid metabolism	Organoheterocyclic compounds	Indoles and derivatives	Indoles	0	35.3	Metabolic pathways;Tryptophan metabolism	Metabolic pathways;Tryptophan metabolism	1.1261	1.1286	0.0001317	0.0002769	5.4792	5.2997	5.3386	5.1086	5.1865	4.7903	4.8048	4.8497	4.887	4.8152
pos_6477	Leucodopachrome	metab_6036	yes	C05604	pos	18766-67-1	178.05	3.47208	M+H-H2O	C9H9NO4	0	46.8	HMDB0004067;PW_C002044	-	-	map01100;map00965;map00350	Metabolism;Metabolism;Metabolism	Global and overview maps;Biosynthesis of other secondary metabolites;Amino acid metabolism	Organoheterocyclic compounds	Indoles and derivatives	Indolecarboxylic acids and derivatives	0	46.8	Metabolic pathways;Betalain biosynthesis;Tyrosine metabolism	Metabolic pathways;Betalain biosynthesis;Tyrosine metabolism	1.7941	1.7884	1.467e-05	8.808e-05	2.8896	2.8857	3.1324	2.9456	3.2233	4.071	3.9309	3.7833	3.7688	3.7659
neg_6483	Indole-3-carboxilic acid-O-sulphate	metab_13825	yes	-	neg	-	286.003	3.77733	M+FA-H	C9H7NO5S	0	44.6	HMDB0060002	-	-	-	-	-	Organoheterocyclic compounds	Indoles and derivatives	Indolecarboxylic acids and derivatives	0	44.6	-	-	1.168	1.164	6.231e-07	3.914e-06	5.4578	5.4853	5.488	5.5504	5.6252	5.0728	5.1039	5.0332	5.0554	5.0704
pos_19	1-(Hydroxymethyl)-5,5-dimethyl-2,4-imidazolidinedione	metab_995	yes	-	pos	116-25-6	176.103	0.945833	M+CH3OH+H, M+2Na-H, M+NH4, M+H	C6H10N2O3	0	40.8	HMDB0031670	-	-	-	-	-	Organoheterocyclic compounds	Azolidines	Imidazolidines	0	40.8	-	-	1.3663	1.3541	5.931e-09	9.536e-07	7.8559	7.8603	7.8638	7.8767	7.8351	7.4081	7.3838	7.3549	7.4435	7.3526
neg_1619	3-Benzyl-5-(6-carboxyhexyl)-1-(2-cyclohexyl-2-hydroxyethylamino)hydantoin	metab_8443	yes	-	neg	-	440.251	3.56445	M-H2O-H	C25H37N3O5	0	48.7	HMDB0249489	-	-	-	-	-	Organoheterocyclic compounds	Azolidines	Imidazolidines	0	48.7	-	-	1.1493	1.1428	2.535e-06	1.153e-05	7.0735	7.017	6.961	6.9201	6.9205	6.5285	6.5024	6.5267	6.6238	6.4905
pos_6665	3-Deazaneplanocin	metab_6242	yes	-	pos	-	280.14	3.19342	M+NH4	C12H14N4O3	0	41.6	HMDB0245851	-	-	-	-	-	Organoheterocyclic compounds	Imidazopyridines	Imidazo-[4,5-c]pyridines	0	41.6	-	-	1.834	1.8131	5.534e-07	1.658e-05	5.0141	4.8034	5.0463	4.918	5.0235	4.0593	4.0813	4.1881	4.2047	3.9996
pos_3121	19-Noraldosterone	metab_2344	yes	-	pos	76025-75-7	385.142	5.33777	M+K	C20H26O5	0	48.9	HMDB0041795	-	-	-	-	-	Lipids and lipid-like molecules	Steroids and steroid derivatives	Hydroxysteroids	0	48.9	-	-	1.526	1.5071	7.858e-07	2.044e-05	5.2243	5.2675	5.2455	5.189	5.343	4.7875	4.5847	4.6313	4.6814	4.631
neg_1490	Fluocinolone	metab_8301	yes	C07006	neg	807-38-5	823.333	3.41445	2M-H	C21H26F2O6	0	47.2	HMDB0252347	-	-	-	-	-	Lipids and lipid-like molecules	Steroids and steroid derivatives	Hydroxysteroids	0	47.2	-	-	1.714	1.7044	4.612e-05	0.000115	6.428	6.4742	6.0561	5.9521	5.9433	5.2224	5.027	5.1028	5.3261	5.079
neg_2158	18-Oxocortisol	metab_9041	yes	-	neg	2410-60-8	397.161	4.28123	M+Na-2H	C21H28O6	0	52.2	HMDB0000332;LMST02030194	-	-	-	-	-	Lipids and lipid-like molecules	Steroids and steroid derivatives	Hydroxysteroids	0	52.2	-	-	1.0675	1.0621	2.446e-05	6.897e-05	5.4216	5.336	5.345	5.3217	5.3113	4.8484	4.8992	4.9617	5.0885	4.9827
neg_2175	16alpha-hydroxyprednisolone	metab_9060	yes	-	neg	-	421.183	4.32042	M+FA-H	C21H28O6	0	76.4	HMDB0244573	-	-	-	-	-	Lipids and lipid-like molecules	Steroids and steroid derivatives	Hydroxysteroids	0	76.4	-	-	1.2936	1.2855	1.012e-05	3.431e-05	5.4494	5.3785	5.3694	5.276	5.3294	4.8043	4.6419	4.7952	4.9583	4.7637
neg_3240	Cortolone	metab_10236	yes	C05481	neg	516-42-7	365.233	6.14142	M-H	C21H34O5	0	68.6	LMST02030227;HMDB0003128	-	-	map00140	Metabolism	Lipid metabolism	Lipids and lipid-like molecules	Steroids and steroid derivatives	Hydroxysteroids	0	68.6	Steroid hormone biosynthesis	Steroid hormone biosynthesis	1.3023	1.2966	1.55e-07	1.616e-06	5.7435	5.6799	5.6631	5.6003	5.6743	5.0515	5.1472	5.0445	5.1523	5.1439
neg_5051	Tetrahydrodeoxycortisol	metab_12241	yes	C14594	neg	68-60-0	395.244	5.74655	M+FA-H	C21H34O4	0	55.1	LMST05030014;HMDB0005972	-	-	-	-	-	Lipids and lipid-like molecules	Steroids and steroid derivatives	Hydroxysteroids	0	55.1	-	-	1.321	1.3222	7.918e-08	1.616e-06	3.4436	3.4391	3.4364	3.4509	3.4368	4.0099	4.089	4.0134	4.0892	3.9183
neg_6049	Fluprednisolone	metab_13346	yes	C14618	neg	53-34-9	413.156	4.24918	M+Cl	C21H27FO5	0	43.6	HMDB0252404	-	-	-	-	-	Lipids and lipid-like molecules	Steroids and steroid derivatives	Hydroxysteroids	0	43.6	-	-	1.2904	1.2811	8.268e-06	2.923e-05	5.764	5.6241	5.7908	5.6953	5.7639	5.1293	5.1103	5.1556	5.3466	5.0793
pos_6060	N-Acetylserotonin	metab_5574	yes	C00978	pos	1210-83-9	251.139	4.11663	M+CH3OH+H	C12H14N2O2	0	43.1	PW_C000956;HMDB0001238	-	-	map01100;map01110;map00380	Metabolism;Metabolism;Metabolism	Global and overview maps;Global and overview maps;Amino acid metabolism	Organoheterocyclic compounds	Indoles and derivatives	Hydroxyindoles	0	43.1	Metabolic pathways;Biosynthesis of secondary metabolites;Tryptophan metabolism	Metabolic pathways;Biosynthesis of secondary metabolites;Tryptophan metabolism	1.1549	1.1469	5.058e-05	0.0002299	5.5073	5.3722	5.4292	5.2612	5.383	4.9912	4.9912	5.0199	5.0798	5.0897
pos_6727	11-beta-Hydroxyandrosterone-3-glucuronide	metab_7694	yes	C05643	pos	-	500.283	3.1052	M+NH4	C25H38O9	0	35.4	HMDB0010351;LMST05010055;LMST05010030	-	-	map00380	Metabolism	Amino acid metabolism	Organoheterocyclic compounds	Indoles and derivatives	Hydroxyindoles	0	35.4	Tryptophan metabolism	Tryptophan metabolism	1.427	1.4101	9.88e-07	2.392e-05	5.5993	5.6534	5.6711	5.6755	5.6592	5.1385	5.0778	5.1366	5.263	5.0509
pos_6678	Demethylsuberosin	metab_6256	yes	C18083	pos	21422-04-8	269.059	3.17705	M+K	C14H14O3	0	49.7	HMDB0304330	-	-	map01061	Metabolism	Chemical structure transformation maps	Phenylpropanoids and polyketides	Coumarins and derivatives	Hydroxycoumarins	0	49.7	Biosynthesis of phenylpropanoids	Biosynthesis of phenylpropanoids	1.1265	1.1229	0.0003256	0.001001	5.5304	5.6916	5.6386	5.745	5.8482	5.4096	5.3843	5.3307	5.2864	5.3184
neg_172	4'-Hydroxy-R-phenprocoumon	metab_8555	yes	-	neg	-	277.086	1.80027	M-H2O-H, M-H	C18H16O4	0	49.5	HMDB0060885	-	-	-	-	-	Phenylpropanoids and polyketides	Coumarins and derivatives	Hydroxycoumarins	0	49.5	-	-	1.0214	1.0146	1.545e-05	4.777e-05	7.0424	7.0209	6.9371	6.942	6.9051	6.5913	6.5977	6.5756	6.7253	6.5804
pos_2916	N1,N10-Diferuloylspermidine	metab_2115	yes	-	pos	70185-61-4	498.26	4.72037	M+H	C27H35N3O6	0	81.3	HMDB0033471	-	-	-	-	-	Phenylpropanoids and polyketides	Cinnamic acids and derivatives	Hydroxycinnamic acids and derivatives	0	81.3	-	-	1.4651	1.4568	6.362e-06	4.573e-05	4.5019	4.6507	4.4183	4.6838	4.6086	5.1879	5.1571	5.0761	5.157	5.0865
pos_5750	4-Hydroxycinnamic acid	metab_7699	yes	C02646	pos	7400-08-0;501-98-4;501-98-4;20649-40-5;4501-31-9	147.044	4.73635	M+H-H2O	C9H8O3	0	36.6	HMDB0030677;HMDB0002035;HMDB0003654	-	-	map01100;map00940;map01110;map01061	Metabolism;Metabolism;Metabolism;Metabolism	Global and overview maps;Biosynthesis of other secondary metabolites;Global and overview maps;Chemical structure transformation maps	Phenylpropanoids and polyketides	Cinnamic acids and derivatives	Hydroxycinnamic acids and derivatives	0	36.6	Metabolic pathways;Phenylpropanoid biosynthesis;Biosynthesis of secondary metabolites;Biosynthesis of phenylpropanoids	Metabolic pathways;Phenylpropanoid biosynthesis;Biosynthesis of secondary metabolites;Biosynthesis of phenylpropanoids	1.2751	1.2625	1.137e-05	7.194e-05	3.9961	4.2201	4.0854	4.1995	4.0773	4.57	4.5476	4.4884	4.5616	4.5294
pos_2611	P-Coumaric Acid	metab_7746	yes	C02646	pos	7400-08-0;501-98-4;501-98-4;20649-40-5;4501-31-9	147.044	3.88263	M+H-H2O	C9H8O3	87.2	0	HMDB0030677;HMDB0002035;HMDB0003654;MJDBOTE0000719	-	-	map01100;map00940;map01110;map01061	Metabolism;Metabolism;Metabolism;Metabolism	Global and overview maps;Biosynthesis of other secondary metabolites;Global and overview maps;Chemical structure transformation maps	Phenylpropanoids and polyketides	Cinnamic acids and derivatives	Hydroxycinnamic acids and derivatives	87.2	0	Metabolic pathways;Phenylpropanoid biosynthesis;Biosynthesis of secondary metabolites;Biosynthesis of phenylpropanoids	Metabolic pathways;Phenylpropanoid biosynthesis;Biosynthesis of secondary metabolites;Biosynthesis of phenylpropanoids	1.0668	1.0587	4.23e-06	4.363e-05	4.5391	4.6442	4.5976	4.6698	4.6433	4.9486	4.9432	4.877	4.8956	4.9056
neg_2780	Isoferulic Acid	metab_9728	yes	C10470	neg	25522-33-2;537-73-5	193.05	5.38787	M-H	C10H10O4	82.9	0	HMDB0000955;HMDB0259693;MJDBOTE0000929	-	-	-	-	-	Phenylpropanoids and polyketides	Cinnamic acids and derivatives	Hydroxycinnamic acids and derivatives	82.9	0	-	-	1.3123	1.306	5.621e-05	0.0001357	4.1757	4.1077	4.1563	4.2184	4.3538	3.7266	3.39	3.7496	3.5476	3.6048
neg_5124	4-Hydroxycinnamoylagmatine	metab_12322	yes	C04498	neg	7295-86-5	275.15	5.63922	M-H	C14H20N4O2	0	33.4	HMDB0033460	-	-	map01100;map00330	Metabolism;Metabolism	Global and overview maps;Amino acid metabolism	Phenylpropanoids and polyketides	Cinnamic acids and derivatives	Hydroxycinnamic acids and derivatives	0	33.4	Metabolic pathways;Arginine and proline metabolism	Metabolic pathways;Arginine and proline metabolism	1.0063	1.0046	0.002292	0.003521	4.355	4.307	4.2145	4.1144	4.1872	3.6854	3.9221	3.6176	3.99	3.988
neg_6041	Ferulic Acid	metab_13338	yes	C01494	neg	537-98-4	193.05	4.26557	M-H	C10H10O4	98.6	0	HMDB0000954;MJDBOTE0000325	-	-	map01100;map00940;map01110;map01061	Metabolism;Metabolism;Metabolism;Metabolism	Global and overview maps;Biosynthesis of other secondary metabolites;Global and overview maps;Chemical structure transformation maps	Phenylpropanoids and polyketides	Cinnamic acids and derivatives	Hydroxycinnamic acids and derivatives	98.6	0	Metabolic pathways;Phenylpropanoid biosynthesis;Biosynthesis of secondary metabolites;Biosynthesis of phenylpropanoids	Metabolic pathways;Phenylpropanoid biosynthesis;Biosynthesis of secondary metabolites;Biosynthesis of phenylpropanoids	1.042	1.0369	3.49e-07	2.45e-06	4.5002	4.6037	4.5295	4.5864	4.4953	4.9144	4.933	4.8999	4.8821	4.8961
pos_6218	Amastatin	metab_5749	yes	C01552	pos	67655-94-1;69400-55-1	457.266	3.86662	M+H-H2O	C21H38N4O8	0	44.4	HMDB0248277	-	-	-	-	-	Organic acids and derivatives	Peptidomimetics	Hybrid peptides	0	44.4	-	-	1.014	1.0026	1.696e-05	9.823e-05	5.6805	5.5785	5.6422	5.6311	5.6639	5.3416	5.3353	5.361	5.4643	5.3551
neg_1455	Sampatrilat	metab_8262	yes	-	neg	-	605.225	3.3753	M+Na-2H	C26H40N4O9S	0	80.5	HMDB0257476	-	-	-	-	-	Organic acids and derivatives	Peptidomimetics	Hybrid peptides	0	80.5	-	-	1.3396	1.3345	1.745e-06	8.721e-06	5.9471	5.8248	5.8191	5.6903	5.7339	5.1848	5.1711	5.2235	5.2679	5.1466
neg_1665	L-beta-aspartyl-L-leucine	metab_8494	yes	-	neg	-	227.103	3.62713	M-H2O-H	C10H18N2O5	0	51.5	HMDB0011166	-	-	-	-	-	Organic acids and derivatives	Peptidomimetics	Hybrid peptides	0	51.5	-	-	1.1139	1.118	0.0001359	0.0002847	6.2871	6.0509	6.1692	5.9735	5.9985	5.5928	5.6202	5.6444	5.76	5.6442
neg_1767	L-beta-aspartyl-L-threonine	metab_8607	yes	-	neg	-	279.084	3.75317	M+FA-H	C8H14N2O6	0	44.5	HMDB0011169	-	-	-	-	-	Organic acids and derivatives	Peptidomimetics	Hybrid peptides	0	44.5	-	-	1.3249	1.3224	5.124e-07	3.373e-06	5.4322	5.4689	5.4304	5.5057	5.4722	4.9716	4.8898	4.7368	4.8859	4.8907
neg_2788	P-Hydroxyubenimex	metab_9736	yes	-	neg	-	305.151	5.39572	M-H2O-H	C16H24N2O5	0	42.3	HMDB0255924	-	-	-	-	-	Organic acids and derivatives	Peptidomimetics	Hybrid peptides	0	42.3	-	-	1.3704	1.3475	0.00797	0.0112	3.2821	3.1782	2.3688	2.3831	3.3266	2.1119	2.1269	2.1457	2.1915	2.1216
neg_5313	Glu-Ile-Leu-Asp-Val	metab_12531	yes	-	neg	-	586.309	5.33688	M-H	C26H45N5O10	0	75.5	HMDB0252757	-	-	-	-	-	Organic acids and derivatives	Peptidomimetics	Hybrid peptides	0	75.5	-	-	1.8557	1.842	2.365e-06	1.089e-05	5.6549	5.6648	5.6797	5.5769	5.5495	4.4299	4.3385	4.341	4.8398	4.4067
neg_6767	Noa-Asn-Apns-Dmt-NH-tBu	metab_14138	yes	-	neg	-	736.301	3.47777	M+FA-H	C36H45N5O7S	0	34.6	HMDB0255676	-	-	-	-	-	Organic acids and derivatives	Peptidomimetics	Hybrid peptides	0	34.6	-	-	1.6428	1.6354	2.749e-05	7.572e-05	5.9677	5.9559	5.6342	5.496	5.5476	4.7956	4.7733	4.6598	4.9215	4.7921
neg_6849	Homoanserine	metab_14229	yes	-	neg	20314-38-9	253.13	3.40662	M-H	C11H18N4O3	0	38.5	HMDB0005767	-	-	-	-	-	Organic acids and derivatives	Peptidomimetics	Hybrid peptides	0	38.5	-	-	1.6348	1.6298	7.958e-08	1.616e-06	5.2087	5.3722	5.2092	5.3365	5.2996	4.4495	4.4981	4.4022	4.3565	4.2981
neg_6876	Talisomycin B	metab_14259	yes	-	neg	-	800.319	3.3753	M-2H	C62H98N20O26S2	0	43.2	HMDB0258694	-	-	-	-	-	Organic acids and derivatives	Peptidomimetics	Hybrid peptides	0	43.2	-	-	1.1845	1.1855	5.361e-06	2.103e-05	6.6461	6.8033	6.7633	6.9116	6.8298	6.3412	6.3375	6.3091	6.298	6.2973
neg_5415	5,8-Dihydroxy-3-(4-hydroxybenzyl)-7-methoxy-4-chromanone 8-acetate	metab_12644	yes	-	neg	99877-75-5	339.088	5.20687	M-H2O-H	C19H18O7	0	51.6	HMDB0037252	-	-	-	-	-	Phenylpropanoids and polyketides	Homoisoflavonoids	Homoisoflavans	0	51.6	-	-	1.1459	1.1528	0.001556	0.002471	3.2397	3.6405	3.434	3.8528	3.4679	3.11	2.9894	3.0084	3.0545	2.9842
pos_5550	Triticonazole	metab_5010	yes	C18815	pos	131983-72-7	350.163	5.13775	M+CH3OH+H	C17H20ClN3O	0	38.7	HMDB0259283	-	-	-	-	-	Benzenoids	Benzene and substituted derivatives	Halobenzenes	0	38.7	-	-	1.1845	1.1788	3.099e-05	0.0001568	4.7853	4.6004	4.7294	4.6533	4.6542	4.2844	4.3812	4.2156	4.3005	4.372
pos_4710	Guanethidine	metab_4086	yes	C07036	pos	645-43-2;55-65-2	435.333	6.32922	2M+K	C10H22N4	0	38	HMDB0015301;MJDBOTE0001576	-	-	-	-	-	Organic nitrogen compounds	Organonitrogen compounds	Guanidines	0	38	-	-	2.1478	2.1323	8.412e-06	5.734e-05	4.5301	5.2028	4.9993	5.1152	5.0963	6.2006	6.2027	6.1498	6.2485	6.1668
pos_984	Hexosylsphingosine	metab_7677	yes	-	pos	-	519.365	7.05227	M+K, M+ACN+H	C24H47NO8	0	36.5	HMDB0253164	-	-	-	-	-	Lipids and lipid-like molecules	Sphingolipids	Glycosphingolipids	0	36.5	-	-	1.5936	1.574	0.001337	0.003199	4.9104	5.3189	4.4598	4.8581	4.6205	5.5596	5.511	5.6885	5.4449	5.626
neg_5689	9-O-Acetyl-GD3	metab_12946	yes	-	neg	-	643.792	4.7733	M-2H	C56H95N3O30	0	57.8	HMDB0247605	-	-	-	-	-	Lipids and lipid-like molecules	Sphingolipids	Glycosphingolipids	0	57.8	-	-	1.2123	1.2057	2.043e-07	1.616e-06	6.1165	6.0287	6.035	6.0727	6.0413	5.5953	5.6154	5.5743	5.5944	5.4731
neg_5544	PS(14:1(9Z)/14:1(9Z))	metab_12787	yes	C02737	neg	-	712.354	5.00087	M+K-2H	C34H62NO10P	0	38.3	LMGP03010919;HMDB0012342;PW_C007872	Lipids	Phospholipids	map01100;map00564;map01110;map05146;map05322;map00260;map05140	Metabolism;Metabolism;Metabolism;Human Diseases;Human Diseases;Metabolism;Human Diseases	Global and overview maps;Lipid metabolism;Global and overview maps;Infectious disease: parasitic;Immune disease;Amino acid metabolism;Infectious disease: parasitic	Lipids and lipid-like molecules	Glycerophospholipids	Glycerophosphoserines	0	38.3	Metabolic pathways;Glycerophospholipid metabolism;Biosynthesis of secondary metabolites;Amoebiasis;Systemic lupus erythematosus;Glycine, serine and threonine metabolism;Leishmaniasis	Metabolic pathways;Glycerophospholipid metabolism;Biosynthesis of secondary metabolites;Amoebiasis;Systemic lupus erythematosus;Glycine, serine and threonine metabolism;Leishmaniasis	1.7401	1.7414	0.0001607	0.0003285	6.0347	5.615	5.8043	5.4512	5.4887	4.3487	4.6075	4.5056	5.0545	4.4958
neg_5643	PS(18:4(6Z,9Z,12Z,15Z)/14:1(9Z))	metab_12896	yes	C02737	neg	-	706.415	4.85657	M-H2O-H	C38H64NO10P	0	49.4	PW_C060893;LMGP03010428;HMDB0112486	Lipids	Phospholipids	map01100;map00564;map01110;map05146;map05322;map00260;map05140	Metabolism;Metabolism;Metabolism;Human Diseases;Human Diseases;Metabolism;Human Diseases	Global and overview maps;Lipid metabolism;Global and overview maps;Infectious disease: parasitic;Immune disease;Amino acid metabolism;Infectious disease: parasitic	Lipids and lipid-like molecules	Glycerophospholipids	Glycerophosphoserines	0	49.4	Metabolic pathways;Glycerophospholipid metabolism;Biosynthesis of secondary metabolites;Amoebiasis;Systemic lupus erythematosus;Glycine, serine and threonine metabolism;Leishmaniasis	Metabolic pathways;Glycerophospholipid metabolism;Biosynthesis of secondary metabolites;Amoebiasis;Systemic lupus erythematosus;Glycine, serine and threonine metabolism;Leishmaniasis	1.2609	1.2598	0.0003218	0.0006021	6.814	6.6643	6.6834	6.5169	6.6085	5.984	5.9757	6.0019	6.4071	6.0665
neg_5370	PGP(i-12:0/a-15:0)	metab_12594	yes	C03892	neg	-	753.379	5.26573	M+Na-2H	C33H66O13P2	0	34.6	HMDB0116532;PW_C076337	-	-	map01100;map00564	Metabolism;Metabolism	Global and overview maps;Lipid metabolism	Lipids and lipid-like molecules	Glycerophospholipids	Glycerophosphoglycerophosphates	0	34.6	Metabolic pathways;Glycerophospholipid metabolism	Metabolic pathways;Glycerophospholipid metabolism	2.0058	1.9932	4.997e-06	1.984e-05	6.4979	6.1082	6.3846	6.1473	6.3538	4.8096	4.9374	4.8484	5.3372	4.7752
pos_1145	1,3,12-Trihydroxycholan-24-oic acid	metab_163	yes	-	pos	63266-91-1	431.277	6.5361	M+Na, 2M+Na	C24H40O5	0	63.1	HMDB0000371	-	-	-	-	-	Lipids and lipid-like molecules	Glycerophospholipids	Glycerophosphoglycerols	0	63.1	-	-	1.1105	1.1127	9.589e-05	0.0003776	7.632	7.5964	7.5755	7.5449	7.6058	7.1408	7.2872	7.3697	7.17	7.3221
pos_4540	LysoPE(22:6(4Z,7Z,10Z,13Z,16Z,19Z)/0:0)	metab_3901	yes	-	pos	-	548.275	6.56792	M+Na	C27H44NO7P	0	91.2	HMDB0011526	-	-	-	-	-	Lipids and lipid-like molecules	Glycerophospholipids	Glycerophosphoethanolamines	0	91.2	-	-	1.7999	1.7862	3.239e-05	0.0001622	5.954	5.7078	5.8702	5.6601	5.6404	5.0085	4.6012	5.0188	5.0405	4.872
pos_6443	LysoPE(18:3(6Z,9Z,12Z)/0:0)	metab_5999	yes	-	pos	-	440.252	3.51208	M+H-2H2O	C23H42NO7P	0	55.9	HMDB0011508	-	-	-	-	-	Lipids and lipid-like molecules	Glycerophospholipids	Glycerophosphoethanolamines	0	55.9	-	-	1.0081	1.0049	0.0001211	0.0004538	5.6544	5.5145	5.5533	5.4482	5.4757	5.2201	5.2627	5.2101	5.3078	5.2605
neg_1858	LysoPE(0:0/20:3(11Z,14Z,17Z))	metab_8708	yes	-	neg	-	524.272	3.87193	M+Na-2H	C25H46NO7P	0	47.8	HMDB0011484	-	-	-	-	-	Lipids and lipid-like molecules	Glycerophospholipids	Glycerophosphoethanolamines	0	47.8	-	-	1.7521	1.7447	1.893e-05	5.631e-05	6.1597	5.8562	6.0267	5.7248	5.9184	4.688	4.9238	4.8193	5.2164	4.7832
neg_4211	LysoPE(P-18:0/0:0)	metab_11311	yes	-	neg	174062-73-8	464.314	6.8203	M-H	C23H48NO6P	0	49.7	HMDB0240598	-	-	-	-	-	Lipids and lipid-like molecules	Glycerophospholipids	Glycerophosphoethanolamines	0	49.7	-	-	1.2892	1.2883	0.0003483	0.0006442	6.8128	6.4926	6.6309	6.4166	6.472	6.0102	5.8777	6.1992	5.9462	5.7582
neg_4430	LysoPE(20:4(5Z,8Z,11Z,14Z)/0:0)	metab_11553	yes	-	neg	652149-09-2	500.278	6.45287	M-H	C25H44NO7P	0	70.9	HMDB0011517	-	-	-	-	-	Lipids and lipid-like molecules	Glycerophospholipids	Glycerophosphoethanolamines	0	70.9	-	-	1.0042	1.0031	0.0001926	0.0003828	7.5996	7.5518	7.496	7.4225	7.3677	7.0925	7.0823	7.104	7.2723	7.0887
neg_6375	LysoPE(0:0/16:1(9Z))	metab_13705	yes	-	neg	-	472.241	3.8876	M+Na-2H	C21H42NO7P	0	48	HMDB0011474	-	-	-	-	-	Lipids and lipid-like molecules	Glycerophospholipids	Glycerophosphoethanolamines	0	48	-	-	1.2501	1.2481	1.449e-05	4.553e-05	6.404	6.2212	6.2901	6.1402	6.1706	5.6484	5.6851	5.6757	5.8377	5.6967
neg_7022	LysoPE(14:1(9Z)/0:0)	metab_14423	yes	-	neg	-	444.21	3.25658	M+Na-2H	C19H38NO7P	0	53	HMDB0011501	-	-	-	-	-	Lipids and lipid-like molecules	Glycerophospholipids	Glycerophosphoethanolamines	0	53	-	-	1.068	1.0658	1.362e-05	4.34e-05	6.1519	5.9981	6.0355	6.0174	5.9877	5.5882	5.606	5.6003	5.7223	5.7134
pos_1115	LysoPC(16:1(9Z)/0:0)	metab_130	yes	C04230	pos	76790-27-7	494.324	6.6552	M+H, M+Na	C24H48NO7P	0	75.1	HMDB0010383	Lipids	Phospholipids	map00564;map05231	Metabolism;Human Diseases	Lipid metabolism;Cancer: overview	Lipids and lipid-like molecules	Glycerophospholipids	Glycerophosphocholines	0	75.1	Glycerophospholipid metabolism;Choline metabolism in cancer	Glycerophospholipid metabolism;Choline metabolism in cancer	1.2721	1.2609	3.532e-07	1.217e-05	7.5573	7.6405	7.5111	7.5486	7.508	8.0082	7.974	7.9545	7.95	7.9345
pos_257	PC(18:1(6Z)/0:0)	metab_1735	yes	-	pos	-	522.356	7.73553	M+K, M+2Na-H, M+H	C26H52NO7P	0	56.7	HMDB0256159;LMGP01050029	-	-	-	-	-	Lipids and lipid-like molecules	Glycerophospholipids	Glycerophosphocholines	0	56.7	-	-	1.1024	1.0903	3.053e-07	1.159e-05	7.1433	7.1747	7.1426	7.1336	7.0659	7.423	7.4662	7.4231	7.4503	7.4315
pos_4078	PC(16:0/0:0)	metab_3390	yes	C04230	pos	17364-16-8	496.34	7.73553	M+H	C24H50NO7P	86	0	HMDB0010382;LMGP01050018	Lipids	Phospholipids	map00564;map05231	Metabolism;Human Diseases	Lipid metabolism;Cancer: overview	Lipids and lipid-like molecules	Glycerophospholipids	Glycerophosphocholines	86	0	Glycerophospholipid metabolism;Choline metabolism in cancer	Glycerophospholipid metabolism;Choline metabolism in cancer	1.0716	1.0629	7.312e-07	1.971e-05	7.8142	7.7945	7.777	7.7365	7.7086	8.0436	8.0857	8.0404	8.0684	8.0484
pos_4615	PC(16:1(9Z)/18:4(6Z,9Z,12Z,15Z))	metab_3983	yes	C00157	pos	-	752.516	6.46443	M+H	C42H74NO8P	0	47.1	LMGP01010692;PW_C004058;HMDB0008009	Lipids	Phospholipids	map01100;map00564;map01110;map00590;map00591;map00592;map05231;map04723	Metabolism;Metabolism;Metabolism;Metabolism;Metabolism;Metabolism;Human Diseases;Organismal Systems	Global and overview maps;Lipid metabolism;Global and overview maps;Lipid metabolism;Lipid metabolism;Lipid metabolism;Cancer: overview;Nervous system	Lipids and lipid-like molecules	Glycerophospholipids	Glycerophosphocholines	0	47.1	Metabolic pathways;Glycerophospholipid metabolism;Biosynthesis of secondary metabolites;Arachidonic acid metabolism;Linoleic acid metabolism;alpha-Linolenic acid metabolism;Choline metabolism in cancer;Retrograde endocannabinoid signaling	Metabolic pathways;Glycerophospholipid metabolism;Biosynthesis of secondary metabolites;Arachidonic acid metabolism;Linoleic acid metabolism;alpha-Linolenic acid metabolism;Choline metabolism in cancer;Retrograde endocannabinoid signaling	2.5619	2.5818	0.008914	0.0161	4.5741	4.7125	4.5794	4.599	4.5962	6.2421	7.4847	7.6605	4.5089	7.6449
pos_995	PC(P-16:0/0:0)	metab_7689	yes	-	pos	-	480.344	7.22752	M+H, M+Na	C24H50NO6P	33.4	0	HMDB0010407;LMGP01070006	-	-	-	-	-	Lipids and lipid-like molecules	Glycerophospholipids	Glycerophosphocholines	33.4	0	-	-	1.075	1.067	0.0001027	0.0003984	6.3578	6.3596	6.3849	6.3924	6.426	6.6289	6.7538	6.8324	6.6065	6.661
neg_6073	LysoPC(14:1(9Z)/0:0)	metab_13373	yes	C04230	neg	-	486.257	4.21782	M+Na-2H	C22H44NO7P	0	37.9	HMDB0010380	Lipids	Phospholipids	map00564;map05231	Metabolism;Human Diseases	Lipid metabolism;Cancer: overview	Lipids and lipid-like molecules	Glycerophospholipids	Glycerophosphocholines	0	37.9	Glycerophospholipid metabolism;Choline metabolism in cancer	Glycerophospholipid metabolism;Choline metabolism in cancer	1.0866	1.0847	6.286e-05	0.000149	6.0279	5.8473	5.9972	5.8628	5.9035	5.4916	5.4917	5.4483	5.6739	5.4711
pos_419	LysoPA(a-13:0/0:0)	metab_3512	yes	-	pos	-	407.159	2.70018	M+Na, M+K	C16H33O7P	0	35.4	HMDB0114760	-	-	-	-	-	Lipids and lipid-like molecules	Glycerophospholipids	Glycerophosphates	0	35.4	-	-	1.2181	1.2096	1.833e-05	0.0001044	6.5021	6.5413	6.3857	6.3388	6.3571	6.0653	5.9844	6.0155	6.0585	6.0469
pos_4545	LysoPA(22:5(7Z,10Z,13Z,16Z,19Z)/0:0)	metab_3906	yes	-	pos	-	526.293	6.55998	M+ACN+H	C25H41O7P	0	70.4	HMDB0114754	-	-	-	-	-	Lipids and lipid-like molecules	Glycerophospholipids	Glycerophosphates	0	70.4	-	-	1.0227	1.02	0.0001057	0.0004082	7.0064	6.8995	6.9677	6.9052	6.8291	6.6786	6.5947	6.6071	6.7196	6.5872
neg_1969	PA(10:0/8:0)	metab_8831	yes	C00416	neg	-	473.226	4.02132	M+Na-2H	C21H41O8P	0	37.6	PW_C062193;HMDB0114778	Lipids	Phospholipids	map01100;map00564;map01110;map00561;map05212;map05200;map04975;map04024;map05231;map04072;map04912;map04070;map04666	Metabolism;Metabolism;Metabolism;Metabolism;Human Diseases;Human Diseases;Organismal Systems;Environmental Information Processing;Human Diseases;Environmental Information Processing;Organismal Systems;Environmental Information Processing;Organismal Systems	Global and overview maps;Lipid metabolism;Global and overview maps;Lipid metabolism;Cancer: specific types;Cancer: overview;Digestive system;Signal transduction;Cancer: overview;Signal transduction;Endocrine system;Signal transduction;Immune system	Lipids and lipid-like molecules	Glycerophospholipids	Glycerophosphates	0	37.6	Metabolic pathways;Glycerophospholipid metabolism;Biosynthesis of secondary metabolites;Glycerolipid metabolism;Pancreatic cancer;Pathways in cancer;Fat digestion and absorption;cAMP signaling pathway;Choline metabolism in cancer;Phospholipase D signaling pathway;GnRH signaling pathway;Phosphatidylinositol signaling system;Fc gamma R-mediated phagocytosis	Metabolic pathways;Glycerophospholipid metabolism;Biosynthesis of secondary metabolites;Glycerolipid metabolism;Pancreatic cancer;Pathways in cancer;Fat digestion and absorption;cAMP signaling pathway;Choline metabolism in cancer;Phospholipase D signaling pathway;GnRH signaling pathway;Phosphatidylinositol signaling system;Fc gamma R-mediated phagocytosis	1.3392	1.3303	1.001e-06	5.602e-06	6.0404	5.9499	5.9719	5.9164	5.951	5.2841	5.3591	5.3467	5.5199	5.3284
neg_2498	PA(8:0/12:0)	metab_9415	yes	C00416	neg	-	501.257	4.90363	M+Na-2H	C23H45O8P	0	54.6	PW_C062909;HMDB0115483	Lipids	Phospholipids	map01100;map00564;map01110;map00561;map05212;map05200;map04975;map04024;map05231;map04072;map04912;map04070;map04666	Metabolism;Metabolism;Metabolism;Metabolism;Human Diseases;Human Diseases;Organismal Systems;Environmental Information Processing;Human Diseases;Environmental Information Processing;Organismal Systems;Environmental Information Processing;Organismal Systems	Global and overview maps;Lipid metabolism;Global and overview maps;Lipid metabolism;Cancer: specific types;Cancer: overview;Digestive system;Signal transduction;Cancer: overview;Signal transduction;Endocrine system;Signal transduction;Immune system	Lipids and lipid-like molecules	Glycerophospholipids	Glycerophosphates	0	54.6	Metabolic pathways;Glycerophospholipid metabolism;Biosynthesis of secondary metabolites;Glycerolipid metabolism;Pancreatic cancer;Pathways in cancer;Fat digestion and absorption;cAMP signaling pathway;Choline metabolism in cancer;Phospholipase D signaling pathway;GnRH signaling pathway;Phosphatidylinositol signaling system;Fc gamma R-mediated phagocytosis	Metabolic pathways;Glycerophospholipid metabolism;Biosynthesis of secondary metabolites;Glycerolipid metabolism;Pancreatic cancer;Pathways in cancer;Fat digestion and absorption;cAMP signaling pathway;Choline metabolism in cancer;Phospholipase D signaling pathway;GnRH signaling pathway;Phosphatidylinositol signaling system;Fc gamma R-mediated phagocytosis	1.3059	1.2916	8.511e-06	2.98e-05	6.0017	6.0991	5.8374	5.9178	5.9147	5.3736	5.3461	5.3762	5.5122	5.2938
neg_5677	PA(8:0/i-12:0)	metab_12933	yes	C00416	neg	-	501.257	4.79582	M+Na-2H	C23H45O8P	0	34.1	HMDB0115685;PW_C064070	Lipids	Phospholipids	map01100;map00564;map01110;map00561;map05212;map05200;map04975;map04024;map05231;map04072;map04912;map04070;map04666	Metabolism;Metabolism;Metabolism;Metabolism;Human Diseases;Human Diseases;Organismal Systems;Environmental Information Processing;Human Diseases;Environmental Information Processing;Organismal Systems;Environmental Information Processing;Organismal Systems	Global and overview maps;Lipid metabolism;Global and overview maps;Lipid metabolism;Cancer: specific types;Cancer: overview;Digestive system;Signal transduction;Cancer: overview;Signal transduction;Endocrine system;Signal transduction;Immune system	Lipids and lipid-like molecules	Glycerophospholipids	Glycerophosphates	0	34.1	Metabolic pathways;Glycerophospholipid metabolism;Biosynthesis of secondary metabolites;Glycerolipid metabolism;Pancreatic cancer;Pathways in cancer;Fat digestion and absorption;cAMP signaling pathway;Choline metabolism in cancer;Phospholipase D signaling pathway;GnRH signaling pathway;Phosphatidylinositol signaling system;Fc gamma R-mediated phagocytosis	Metabolic pathways;Glycerophospholipid metabolism;Biosynthesis of secondary metabolites;Glycerolipid metabolism;Pancreatic cancer;Pathways in cancer;Fat digestion and absorption;cAMP signaling pathway;Choline metabolism in cancer;Phospholipase D signaling pathway;GnRH signaling pathway;Phosphatidylinositol signaling system;Fc gamma R-mediated phagocytosis	1.4537	1.4409	2.037e-06	9.745e-06	5.6429	5.5869	5.5734	5.5367	5.5805	4.8698	4.8341	4.8629	5.0837	4.7448
pos_2233	Micheliolide	metab_1364	yes	C09507	pos	68370-47-8	312.155	3.02515	M+ACN+Na	C15H20O3	0	48.1	HMDB0254704	-	-	-	-	-	Organoheterocyclic compounds	Lactones	Gamma butyrolactones	0	48.1	-	-	1.0546	1.0518	0.0005453	0.00151	4.6174	4.424	4.6693	4.4962	4.4903	4.1034	4.2315	4.1957	4.2899	4.2943
pos_4286	(trans)-3-methyloctanoic acid-gamma-lactone	metab_3619	yes	-	pos	-	335.219	7.0682	2M+Na	C9H16O2	0	32.5	HMDB0303881	-	-	-	-	-	Organoheterocyclic compounds	Lactones	Gamma butyrolactones	0	32.5	-	-	1.4098	1.3955	6.83e-05	0.0002923	5.0931	5.176	5.1821	5.2464	5.2399	4.884	4.6358	4.4809	4.6624	4.6318
neg_3324	Artabsin	metab_10329	yes	C09301	neg	24399-20-0	541.284	6.29697	2M+FA-H	C15H20O3	0	31.3	HMDB0036641	-	-	-	-	-	Organoheterocyclic compounds	Lactones	Gamma butyrolactones	0	31.3	-	-	1.1708	1.1649	2.91e-05	7.912e-05	6.0288	6.0014	5.9928	5.8577	5.9159	5.5227	5.5372	5.3515	5.6084	5.4116
neg_6314	Alectrol	metab_13638	yes	C09059	neg	143572-84-3	383.092	3.95018	M+K-2H	C19H22O6	0	59.5	HMDB0041372	-	-	-	-	-	Organoheterocyclic compounds	Lactones	Gamma butyrolactones	0	59.5	-	-	1.9217	1.9188	1.47e-05	4.601e-05	4.4291	4.6328	4.5912	4.7174	4.8435	3.8366	3.2153	3.3646	3.2803	3.21
neg_2035	9-Fluoroprednisolone	metab_8906	yes	C14484	neg	124097-45-6;338-95-4	755.359	4.10033	2M-H	C21H27FO5	0	70.5	HMDB0040539;HMDB0247595	-	-	-	-	-	Phenylpropanoids and polyketides	Flavonoids	Flavonoid glycosides	0	70.5	-	-	1.8608	1.8477	0.0001262	0.0002675	6.4579	6.3295	6.2707	6.1127	6.2639	4.9993	4.6475	5.0621	5.6759	4.9979
neg_6940	Thesinine 4'-O-glucoside	metab_14331	yes	-	neg	-	494.199	3.32765	M+FA-H	C23H31NO8	0	75.4	HMDB0039900	-	-	-	-	-	Phenylpropanoids and polyketides	Flavonoids	Flavonoid glycosides	0	75.4	-	-	1.0001	0.9931	1.222e-06	6.604e-06	5.7868	5.7781	5.7504	5.7536	5.7551	5.4084	5.4294	5.3609	5.5133	5.441
neg_3384	Arachidonoyl Serinol	metab_10395	yes	-	neg	183718-70-9	398.266	6.41385	M+Na-2H	C23H39NO3	0	34.2	HMDB0013650	-	-	-	-	-	Lipids and lipid-like molecules	Fatty Acyls	Fatty amides	0	34.2	-	-	1.1121	1.1028	1.532e-05	4.751e-05	6.4729	6.424	6.4328	6.4566	6.4427	6.088	6.0216	5.9071	6.1551	5.9525
neg_6559	N-Ethylmaleamic acid	metab_13908	yes	-	neg	-	285.109	3.69047	2M-H	C6H9NO3	0	39.9	HMDB0255136	-	-	-	-	-	Lipids and lipid-like molecules	Fatty Acyls	Fatty amides	0	39.9	-	-	1.0754	1.0909	0.006397	0.009117	3.4961	4.0475	3.4897	3.7041	4.0612	4.2239	4.388	4.1306	4.1909	4.3322
pos_1113	1-Acetoxy-2-hydroxy-16-heptadecen-4-one	metab_128	yes	-	pos	25346-18-3	309.242	6.66317	M+H-H2O, M+H	C19H34O4	0	37.9	HMDB0031006;LMFA05000594	-	-	-	-	-	Lipids and lipid-like molecules	Fatty Acyls	Fatty alcohols	0	37.9	-	-	1.2521	1.2379	2.545e-07	1.056e-05	6.2308	6.2113	6.2207	6.1718	6.2588	5.8492	5.7973	5.7563	5.8752	5.8309
pos_5112	2-Hydroxy-4-[(1R)-1-hydroxy-8-methyl-6-oxononyl]-3-methyl-2H-furan-5-one	metab_4529	yes	-	pos	-	586.36	5.9558	2M+NH4	C15H24O5	0	58.9	HMDB0258463	-	-	-	-	-	Lipids and lipid-like molecules	Fatty Acyls	Fatty alcohols	0	58.9	-	-	1.0237	1.0164	0.03843	0.05671	3.9128	4.5449	3.667	3.6866	3.9835	3.5652	3.5552	3.5488	3.5965	3.5592
pos_6096	Glycerol 1-(5-hydroxydodecanoate)	metab_5613	yes	-	pos	26446-32-2	329.17	4.05197	M+K	C15H30O5	0	32.2	HMDB0040168	-	-	-	-	-	Lipids and lipid-like molecules	Fatty Acyls	Fatty alcohols	0	32.2	-	-	2.0109	1.9824	0.0009152	0.002323	2.6998	3.3251	3.364	3.9199	2.7792	4.3456	4.3454	4.3054	4.3591	4.4373
neg_1355	Docebenone	metab_8151	yes	C01349	neg	80809-81-0	363.134	3.26505	M+K-2H	C21H26O3	0	34.8	HMDB0247732;LMFA05000652	-	-	-	-	-	Lipids and lipid-like molecules	Fatty Acyls	Fatty alcohols	0	34.8	-	-	1.0911	1.0852	2.344e-07	1.8e-06	5.6288	5.588	5.5481	5.5842	5.5889	5.1155	5.2067	5.1794	5.2222	5.235
pos_3430	Panaquinquecol 6	metab_2682	yes	-	pos	145400-15-3	301.18	6.13907	M+H-H2O	C19H26O4	0	32.1	HMDB0035500;LMFA07010986	-	-	-	-	-	Lipids and lipid-like molecules	Fatty Acyls	Fatty alcohol esters	0	32.1	-	-	1.31	1.2996	6.341e-05	0.0002745	4.6329	4.6939	4.4478	4.5296	4.6788	4.0153	4.2405	4.1815	4.1249	4.1458
pos_47	4-Hydroxyproline galactoside	metab_4073	yes	-	pos	80185-44-0	276.108	2.51633	M+H-H2O, M+H, M+Na, M+K	C11H19NO8	0	54.5	HMDB0029354	-	-	-	-	-	Lipids and lipid-like molecules	Fatty Acyls	Fatty alcohol esters	0	54.5	-	-	1.172	1.167	0.0003086	0.0009599	5.1913	4.9777	5.2362	5.2772	5.0481	4.7481	4.7741	4.6746	4.847	4.7691
neg_4217	Citronellyl formate	metab_11317	yes	C12295	neg	105-85-1	367.285	6.81252	2M-H	C11H20O2	0	30.4	HMDB0033371;LMPR0102010014	-	-	-	-	-	Lipids and lipid-like molecules	Fatty Acyls	Fatty alcohol esters	0	30.4	-	-	1.2656	1.2748	0.0001347	0.0002826	5.5398	5.3525	5.5433	5.4394	5.2738	5.9676	5.8254	5.936	6.2133	6.0424
neg_5950	Gibberellin A29	metab_13236	yes	C06096	neg	-	385.107	4.39088	M+K-2H	C19H24O6	0	36.9	LMPR0104170036;HMDB0303458	-	-	map00904	Metabolism	Metabolism of terpenoids and polyketides	Lipids and lipid-like molecules	Fatty Acyls	Fatty alcohol esters	0	36.9	Diterpenoid biosynthesis	Diterpenoid biosynthesis	1.391	1.3939	3.535e-06	1.498e-05	5.2047	5.3709	5.3749	5.4232	5.4905	4.6474	4.8204	4.7307	4.6402	4.7556
pos_5447	Pantoyllactone glucoside	metab_4898	yes	-	pos	-	325.152	5.34577	M+CH3OH+H	C12H20O8	0	56.3	HMDB0041269	-	-	-	-	-	Lipids and lipid-like molecules	Fatty Acyls	Fatty acyl glycosides	0	56.3	-	-	1.5541	1.5371	3.561e-07	1.217e-05	4.6749	4.6631	4.6625	4.6257	4.7943	4.128	3.9873	4.1393	4.0394	4.0743
pos_6172	(3S,5R,6S,7E,9x)-7-Megastigmene-3,6,9-triol 9-glucoside	metab_5698	yes	-	pos	-	423.26	3.9473	M+CH3OH+H	C19H34O8	0	46.2	LMFA13010057;HMDB0041176	-	-	-	-	-	Lipids and lipid-like molecules	Fatty Acyls	Fatty acyl glycosides	0	46.2	-	-	1.3359	1.3208	5.767e-07	1.673e-05	6.1429	6.0895	6.0549	6.0259	6.1015	5.6152	5.6154	5.5848	5.7259	5.6055
pos_6833	Butyl (S)-3-hydroxybutyrate [arabinosyl-(1->6)-glucoside]	metab_6428	yes	-	pos	-	472.24	2.96935	M+NH4	C19H34O12	0	57	HMDB0039214	-	-	-	-	-	Lipids and lipid-like molecules	Fatty Acyls	Fatty acyl glycosides	0	57	-	-	1.2418	1.2306	3.096e-05	0.0001568	6.2541	5.988	6.1184	6.0358	6.1347	5.695	5.7012	5.6598	5.7575	5.6858
neg_3301	7,8-Dihydro-3b,6a-dihydroxy-alpha-ionol 9-glucoside	metab_10304	yes	-	neg	177261-75-5	371.207	6.25812	M-H2O-H	C19H34O8	0	32.8	HMDB0041578	-	-	-	-	-	Lipids and lipid-like molecules	Fatty Acyls	Fatty acyl glycosides	0	32.8	-	-	1.3071	1.2959	2.08e-07	1.637e-06	7.219	7.2774	7.2085	7.2384	7.2268	6.6514	6.6246	6.6332	6.7991	6.6402
neg_5808	(E)-2-Methyl-2-buten-1-ol O-beta-D-Glucopyranoside	metab_13079	yes	-	neg	-	293.124	4.59687	M+FA-H	C11H20O6	0	45.3	HMDB0033064	-	-	-	-	-	Lipids and lipid-like molecules	Fatty Acyls	Fatty acyl glycosides	0	45.3	-	-	1.1126	1.1248	0.001963	0.003051	5.4237	4.919	5.3184	5.0083	5.1417	4.6432	4.5583	4.6171	4.8582	4.7171
neg_6944	Melibiitol	metab_14335	yes	C05399	neg	-	365.109	3.32765	M+Na-2H	C12H24O11	0	73.5	HMDB0006791;PW_C002929	-	-	map00052	Metabolism	Carbohydrate metabolism	Lipids and lipid-like molecules	Fatty Acyls	Fatty acyl glycosides	0	73.5	Galactose metabolism	Galactose metabolism	1.9456	1.9415	7.494e-08	1.616e-06	4.0112	3.7193	3.8091	4.0546	3.98	5.1381	5.1243	5.155	5.2055	5.244
pos_1295	12-Hydroxyheptadeca-5,8,10-trienoic acid	metab_328	yes	-	pos	-	303.195	6.0993	M+Na, M+ACN+H	C17H28O3	0	41.9	HMDB0244447	-	-	-	-	-	Lipids and lipid-like molecules	Fatty Acyls	Fatty acids and conjugates	0	41.9	-	-	1.3714	1.4207	0.004693	0.009372	4.2849	4.5158	4.4791	4.4585	4.5907	3.6814	3.7223	4.1341	3.5648	4.3001
pos_1303	(9S,10E,12S,13S)-9,12,13-Trihydroxy-10-octadecenoic acid	metab_338	yes	-	pos	97134-11-7	295.226	6.09132	M+H-2H2O, M+H	C18H34O5	0	47.5	HMDB0038555	-	-	-	-	-	Lipids and lipid-like molecules	Fatty Acyls	Fatty acids and conjugates	0	47.5	-	-	1.4219	1.4116	9.788e-06	6.429e-05	5.1431	5.2585	5.0202	5.1919	5.0762	4.5709	4.6909	4.626	4.6666	4.506
pos_1335	Ipratropium bromide	metab_373	yes	C07052	pos	60205-81-4	374.253	6.0355	M+2Na-H, M+ACN+H	C20H30NO3+	0	47.6	HMDB0249401;HMDB0014476	-	-	-	-	-	Lipids and lipid-like molecules	Fatty Acyls	Fatty acids and conjugates	0	47.6	-	-	1.8924	1.9016	3.084e-05	0.0001563	4.5701	4.6869	4.6239	4.7319	4.6279	3.5017	4.0179	3.4854	3.5766	3.9
pos_144	(6R,8Z)-6-Hydroxy-3-oxotetradecenoic acid	metab_489	yes	-	pos	-	530.369	6.06733	M+H-H2O, M+H, 2M+NH4	C14H24O4	0	44	HMDB0062363	-	-	-	-	-	Lipids and lipid-like molecules	Fatty Acyls	Fatty acids and conjugates	0	44	-	-	1.5993	1.578	0.0001968	0.0006637	4.6383	4.7528	4.759	4.8435	4.7895	4.1854	4.259	4.0662	4.1354	3.6779
pos_2321	2,4-Dimethyladipic acid	metab_1461	yes	-	pos	-	139.075	3.2014	M+H-2H2O	C8H14O4	0	48	HMDB0059727	-	-	-	-	-	Lipids and lipid-like molecules	Fatty Acyls	Fatty acids and conjugates	0	48	-	-	1.8163	1.8209	0.02133	0.03438	3.1967	2.7088	2.718	2.7376	3.3386	3.2995	4.5891	4.9596	3.0627	4.5864
pos_2539	Aminocaproic acid	metab_1701	yes	C02378	pos	60-32-2	173.129	3.70543	M+ACN+H	C6H13NO2	0	41.5	HMDB0001901;PW_C001268	-	-	map01100;map00930;map01120	Metabolism;Metabolism;Metabolism	Global and overview maps;Xenobiotics biodegradation and metabolism;Global and overview maps	Lipids and lipid-like molecules	Fatty Acyls	Fatty acids and conjugates	0	41.5	Metabolic pathways;Caprolactam degradation;Microbial metabolism in diverse environments	Metabolic pathways;Caprolactam degradation;Microbial metabolism in diverse environments	1.0631	1.057	2.055e-05	0.000114	5.0142	4.9723	4.986	4.8755	4.8813	4.6392	4.6515	4.6257	4.7133	4.6067
pos_2898	5-Acetamidovalerate	metab_2094	yes	C03087	pos	-	360.212	4.65572	2M+ACN+H	C7H13NO3	0	37.9	HMDB0012175;LMFA01030987	-	-	map01100;map00310	Metabolism;Metabolism	Global and overview maps;Amino acid metabolism	Lipids and lipid-like molecules	Fatty Acyls	Fatty acids and conjugates	0	37.9	Metabolic pathways;Lysine degradation	Metabolic pathways;Lysine degradation	1.2607	1.2469	2.533e-06	4.256e-05	5.2483	5.2093	5.1646	5.1762	5.1812	4.7841	4.8229	4.7417	4.8858	4.7062
pos_3644	11,14-Eicosadienoic acid	metab_2913	yes	C16525	pos	5598-38-9	341.305	6.79055	M+CH3OH+H	C20H36O2	0	34.2	HMDB0244372;HMDB0005060;LMFA01030130	Lipids	Fatty acids	map01040	Metabolism	Lipid metabolism	Lipids and lipid-like molecules	Fatty Acyls	Fatty acids and conjugates	0	34.2	Biosynthesis of unsaturated fatty acids	Biosynthesis of unsaturated fatty acids	1.6477	1.6436	3.834e-05	0.0001847	4.483	4.7004	4.6846	4.5795	4.6711	3.8589	4.2143	3.8404	3.8255	3.7882
pos_3737	DG(9D5/9D3/0:0)	metab_3014	yes	C00165	pos	-	655.49	7.16392	M+H-H2O	C41H68O7	0	37.1	PW_C063676;HMDB0116437	-	-	map05214;map05167;map04650;map05163;map04750;map05235;map04015;map04014;map04659;map04540;map04010;map04012;map05022;map04370;map04371;map04072;map04071;map04975;map05143;map05012;map05231;map05146;map04919;map05200;map04961;map04745;map04921;map04920;map04923;map04925;map05017;map04625;map04929;map04726;map04725;map04724;map04723;map04722;map05223;map04720;map04666;map05170;map04664;map04658;map…	Human Diseases;Human Diseases;Organismal Systems;Human Diseases;Organismal Systems;Human Diseases;Environmental Information Processing;Environmental Information Processing;Organismal Systems;Cellular Processes;Environmental Information Processing;Environmental Information Processing;Human Diseases;Environmental Information Processing;Environmental Information Processing;Environmental Information …	Cancer: specific types;Infectious disease: viral;Immune system;Infectious disease: viral;Sensory system;Cancer: overview;Signal transduction;Signal transduction;Immune system;Cellular community - eukaryotes;Signal transduction;Signal transduction;Neurodegenerative disease;Signal transduction;Signal transduction;Signal transduction;Signal transduction;Digestive system;Infectious disease: parasitic…	Lipids and lipid-like molecules	Fatty Acyls	Fatty acids and conjugates	0	37.1	Glioma;Kaposi sarcoma-associated herpesvirus infection;Natural killer cell mediated cytotoxicity;Human cytomegalovirus infection;Inflammatory mediator regulation of TRP channels;PD-L1 expression and PD-1 checkpoint pathway in cancer;Rap1 signaling pathway;Ras signaling pathway;Th17 cell differentiation;Gap junction;MAPK signaling pathway;ErbB signaling pathway;Pathways of neurodegeneration - mult…	Glioma;Kaposi sarcoma-associated herpesvirus infection;Natural killer cell mediated cytotoxicity;Human cytomegalovirus infection;Inflammatory mediator regulation of TRP channels;PD-L1 expression and PD-1 checkpoint pathway in cancer;Rap1 signaling pathway;Ras signaling pathway;Th17 cell differentiation;Gap junction;MAPK signaling pathway;ErbB signaling pathway;Pathways of neurodegeneration - mult…	1.5191	1.5107	1.613e-05	9.444e-05	5.6092	5.6901	5.5584	5.6759	5.7333	5.1581	4.9434	5.2155	4.9262	5.0245
pos_390	7,8-diaminopelargonate	metab_3193	yes	C01037	pos	-	230.186	1.85303	M+H-H2O, M+ACN+H	C9H20N2O2	0	38.6	HMDB0304236	-	-	map01100;map00780;map01240	Metabolism;Metabolism;Metabolism	Global and overview maps;Metabolism of cofactors and vitamins;Global and overview maps	Lipids and lipid-like molecules	Fatty Acyls	Fatty acids and conjugates	0	38.6	Metabolic pathways;Biotin metabolism;Biosynthesis of cofactors	Metabolic pathways;Biotin metabolism;Biosynthesis of cofactors	1.1747	1.1642	0.0005053	0.001421	5.7232	5.5082	5.7871	5.8696	5.841	5.3615	5.4132	5.2807	5.3455	5.4031
pos_4405	Xi-5-Hydroxydodecanoic acid	metab_3751	yes	-	pos	7779-95-5	455.335	6.79845	2M+Na	C12H24O3	0	31.1	HMDB0040169;LMFA01050529	-	-	-	-	-	Lipids and lipid-like molecules	Fatty Acyls	Fatty acids and conjugates	0	31.1	-	-	1.2104	1.1924	8.911e-06	5.985e-05	6.215	6.122	6.2585	6.2274	6.3213	5.8963	5.8158	5.8509	5.8951	5.8009
pos_4444	FAHFA(16:0/13-O-18:0)	metab_3794	yes	-	pos	-	556.53	6.73472	M+NH4	C34H66O4	0	78.3	LMFA07090008;HMDB0112121	-	-	-	-	-	Lipids and lipid-like molecules	Fatty Acyls	Fatty acids and conjugates	0	78.3	-	-	1.0091	1.0038	0.005498	0.01069	6.5096	6.4102	6.2885	6.2718	6.2465	6.1689	5.7675	6.0889	6.0049	6.0907
pos_4492	3-Methyl-5-pentyl-2-furantridecanoic acid	metab_3847	yes	-	pos	57818-42-5	387.289	6.6394	M+Na	C23H40O3	0	65.3	HMDB0061648	-	-	-	-	-	Lipids and lipid-like molecules	Fatty Acyls	Fatty acids and conjugates	0	65.3	-	-	1.8296	1.8019	8.429e-06	5.734e-05	4.9426	4.7688	4.7067	4.7247	5.1103	4.0148	3.9234	4.1265	3.9647	3.9274
pos_4493	5b-Cholestane-3a,7a,12a,23R,25-pentol	metab_3848	yes	C01571	pos	59906-14-8	475.34	6.63155	M+Na	C27H48O5	0	39.5	HMDB0000513;LMST01010240	Lipids	Fatty acids	map01100;map00061	Metabolism;Metabolism	Global and overview maps;Lipid metabolism	Lipids and lipid-like molecules	Fatty Acyls	Fatty acids and conjugates	0	39.5	Metabolic pathways;Fatty acid biosynthesis	Metabolic pathways;Fatty acid biosynthesis	1.2144	1.1987	0.0001263	0.0004695	5.4436	5.484	5.5017	5.4837	5.4472	5.08	5.0569	5.1421	5.2204	4.8812
pos_4579	4,7,10,13-Hexadecatetraenoic acid	metab_3942	yes	-	pos	-	233.19	6.52817	M+H-H2O	C16H26O2	0	47.7	HMDB0246620;LMFA01030702;HMDB0253125	-	-	-	-	-	Lipids and lipid-like molecules	Fatty Acyls	Fatty acids and conjugates	0	47.7	-	-	2.059	2.0863	0.01823	0.03005	3.7075	3.7036	3.7128	3.7324	3.7296	4.359	5.8046	5.9817	3.6423	6.0092
pos_5081	3-Hydroxyphenyl-valeric acid	metab_4494	yes	-	pos	-	227.128	5.99563	M+CH3OH+H	C11H14O3	0	37.6	HMDB0041666	-	-	-	-	-	Lipids and lipid-like molecules	Fatty Acyls	Fatty acids and conjugates	0	37.6	-	-	1.2618	1.2396	0.001698	0.003904	3.9746	3.7931	3.4678	3.9717	3.9617	3.366	3.3561	3.3497	3.4433	3.3601
pos_6095	8-Mercaptooctanoic acid	metab_5612	yes	-	pos	-	394.208	4.05197	2M+ACN+H	C8H16O2S	0	54.1	HMDB0247447	-	-	-	-	-	Lipids and lipid-like molecules	Fatty Acyls	Fatty acids and conjugates	0	54.1	-	-	1.1989	1.1926	0.0002382	0.0007729	4.3357	4.5857	4.4862	4.651	4.6176	4.9237	4.8741	4.8756	4.9776	5.013
pos_6657	Ethyladipic acid	metab_6233	yes	-	pos	22935-13-3	157.086	3.20938	M+H-H2O	C8H14O4	0	41.3	HMDB0002023;LMFA01170104	-	-	-	-	-	Lipids and lipid-like molecules	Fatty Acyls	Fatty acids and conjugates	0	41.3	-	-	1.687	1.7194	0.04651	0.06707	3.1031	3.0992	3.1084	3.1279	3.1252	3.0066	4.8447	5.2034	3.1559	4.8222
pos_7086	(9Z)-(13S)-12,13-epoxyoctadeca-9,11-dienoate	metab_6708	yes	C04594	pos	-	294.217	2.71615	M+H	C18H29O3-	0	35	HMDB0303983	-	-	-	-	-	Lipids and lipid-like molecules	Fatty Acyls	Fatty acids and conjugates	0	35	-	-	1.9315	1.9223	7.718e-07	2.017e-05	5.1718	5.0813	5.1402	5.1552	5.2915	4.2197	4.1967	4.1284	4.0923	4.4386
neg_3296	Traumatic Acid	metab_10297	yes	C16308	neg	6402-36-4	227.128	6.25042	M-H	C12H20O4	79.5	0	HMDB0000933;LMFA01170002	-	-	map00592;map01110	Metabolism;Metabolism	Lipid metabolism;Global and overview maps	Lipids and lipid-like molecules	Fatty Acyls	Fatty acids and conjugates	79.5	0	alpha-Linolenic acid metabolism;Biosynthesis of secondary metabolites	alpha-Linolenic acid metabolism;Biosynthesis of secondary metabolites	1.5084	1.5003	3.807e-05	9.84e-05	5.4872	5.2893	5.3889	5.1521	5.3269	4.3789	4.7331	4.5578	4.6942	4.3466
neg_3406	Arachidonic acid	metab_10420	yes	C00219	neg	506-32-1	303.233	6.45287	M-H	C20H32O2	0	61.4	LMFA01030001;HMDB0001043;PW_C000821	Lipids	Fatty acids	map05140;map04666;map04750;map04270;map04217;map04216;map05146;map07034;map00590;map00591;map04921;map04923;map04925;map01040;map04726;map04745;map01100;map04664;map04723;map04912;map04913;map04730;map04611	Human Diseases;Organismal Systems;Organismal Systems;Organismal Systems;Cellular Processes;Cellular Processes;Human Diseases;Drug Development;Metabolism;Metabolism;Organismal Systems;Organismal Systems;Organismal Systems;Metabolism;Organismal Systems;Organismal Systems;Metabolism;Organismal Systems;Organismal Systems;Organismal Systems;Organismal Systems;Organismal Systems;Organismal Systems	Infectious disease: parasitic;Immune system;Sensory system;Circulatory system;Cell growth and death;Cell growth and death;Infectious disease: parasitic;Structure-based classification;Lipid metabolism;Lipid metabolism;Endocrine system;Endocrine system;Endocrine system;Lipid metabolism;Nervous system;Sensory system;Global and overview maps;Immune system;Nervous system;Endocrine system;Endocrine sys…	Lipids and lipid-like molecules	Fatty Acyls	Fatty acids and conjugates	0	61.4	Leishmaniasis;Fc gamma R-mediated phagocytosis;Inflammatory mediator regulation of TRP channels;Vascular smooth muscle contraction;Necroptosis;Ferroptosis;Amoebiasis;Eicosanoids;Arachidonic acid metabolism;Linoleic acid metabolism;Oxytocin signaling pathway;Regulation of lipolysis in adipocytes;Aldosterone synthesis and secretion;Biosynthesis of unsaturated fatty acids;Serotonergic synapse;Photot…	Leishmaniasis;Fc gamma R-mediated phagocytosis;Inflammatory mediator regulation of TRP channels;Vascular smooth muscle contraction;Necroptosis;Ferroptosis;Amoebiasis;Eicosanoids;Arachidonic acid metabolism;Linoleic acid metabolism;Oxytocin signaling pathway;Regulation of lipolysis in adipocytes;Aldosterone synthesis and secretion;Biosynthesis of unsaturated fatty acids;Serotonergic synapse;Photot…	1.1089	1.1102	0.0002975	0.0005613	5.9736	5.8396	5.8413	5.7315	5.6801	5.3439	5.2513	5.3894	5.5589	5.3072
neg_3439	12-Hydroxyoctadecanoic acid	metab_10456	yes	-	neg	106-14-9	299.259	6.51547	M-H	C18H36O3	40.6	0	HMDB0061706	-	-	-	-	-	Lipids and lipid-like molecules	Fatty Acyls	Fatty acids and conjugates	40.6	0	-	-	1.7143	1.7049	1.182e-07	1.616e-06	6.9726	6.7247	6.9065	6.9365	7.0289	5.9344	5.9493	5.8985	6.0158	5.8991
neg_3615	Polypropylene	metab_10651	yes	C19505	neg	9003-07-0	353.306	6.94515	M-H	C22H42O3	0	54.9	HMDB0255988	-	-	-	-	-	Lipids and lipid-like molecules	Fatty Acyls	Fatty acids and conjugates	0	54.9	-	-	1.357	1.3708	3.083e-05	8.303e-05	4.12	4.032	3.9008	3.9152	3.9052	4.6128	4.6388	4.4385	4.828	4.5698
neg_4170	Tetracosanedioic acid	metab_11265	yes	-	neg	-	379.321	6.95297	M-H2O-H	C24H46O4	0	50.6	LMFA01170039;HMDB0302983	-	-	-	-	-	Lipids and lipid-like molecules	Fatty Acyls	Fatty acids and conjugates	0	50.6	-	-	1.2468	1.2516	0.000254	0.0004888	3.9593	3.9548	3.9521	3.9666	3.9525	4.5744	4.5561	4.1872	4.7404	4.5478
neg_4220	2-Hydroxyoctadecanoic acid	metab_11321	yes	C03045	neg	26531-80-6	299.259	6.80477	M-H	C18H36O3	0	54.9	HMDB0242145;HMDB0062549	-	-	-	-	-	Lipids and lipid-like molecules	Fatty Acyls	Fatty acids and conjugates	0	54.9	-	-	1.2389	1.2333	2.319e-05	6.625e-05	6.4566	6.1311	6.3549	6.3197	6.4181	5.827	5.7378	5.7976	5.8722	5.8003
neg_4474	Asparagoside A	metab_11601	yes	C08886	neg	14835-43-9	623.38	6.39045	M+FA-H	C33H54O8	0	52.8	HMDB0030046	-	-	-	-	-	Lipids and lipid-like molecules	Fatty Acyls	Fatty acids and conjugates	0	52.8	-	-	1.3474	1.3365	2.532e-07	1.903e-06	7.1479	7.2171	7.1671	7.2079	7.2426	6.627	6.64	6.5456	6.6778	6.4926
neg_4719	Decanedioic acid	metab_11872	yes	C08277	neg	111-20-6	201.113	6.04047	M-H	C10H18O4	86.3	0	LMFA01170006;HMDB0000792	-	-	-	-	-	Lipids and lipid-like molecules	Fatty Acyls	Fatty acids and conjugates	86.3	0	-	-	1.0284	1.0263	0.003163	0.004747	4.639	4.133	4.1303	4.4578	4.2348	3.872	3.8871	3.906	3.9522	3.8818
neg_4770	20-Hydroxyeicosatetraenoic acid	metab_11929	yes	C14748	neg	79551-86-3	365.233	5.98617	M+FA-H	C20H32O3	0	34.8	PW_C002614;HMDB0005998	-	-	map00590;map01100;map04270	Metabolism;Metabolism;Organismal Systems	Lipid metabolism;Global and overview maps;Circulatory system	Lipids and lipid-like molecules	Fatty Acyls	Fatty acids and conjugates	0	34.8	Arachidonic acid metabolism;Metabolic pathways;Vascular smooth muscle contraction	Arachidonic acid metabolism;Metabolic pathways;Vascular smooth muscle contraction	1.2718	1.2605	9.692e-08	1.616e-06	4.7715	4.7616	4.6367	4.7438	4.7786	4.1783	4.1934	4.2123	4.2585	4.1881
neg_4773	(2E,4E)-2,4-Hexadienoic acid	metab_11932	yes	-	neg	110-44-1	335.153	5.98617	3M-H	C6H8O2	0	31.5	HMDB0029581	-	-	-	-	-	Lipids and lipid-like molecules	Fatty Acyls	Fatty acids and conjugates	0	31.5	-	-	1.9235	1.914	2.722e-08	1.203e-06	4.9247	4.7077	4.5972	4.664	4.6591	3.4591	3.4742	3.4932	3.5393	3.4689
neg_4834	2-Heptenoic acid	metab_12000	yes	-	neg	18999-28-5	301.166	5.94705	2M+FA-H	C7H12O2	0	31.7	LMFA01030012;HMDB0031484	-	-	-	-	-	Lipids and lipid-like molecules	Fatty Acyls	Fatty acids and conjugates	0	31.7	-	-	2.8069	2.7755	1.516e-05	4.709e-05	4.3829	4.5162	4.1817	4.489	4.6606	2.4262	1.1849	1.6949	2.4101	1.1799
neg_4875	Undecylenic acid	metab_12045	yes	C13910	neg	112-38-9	229.144	5.92348	M+FA-H	C11H20O2	0	56.8	LMFA01030036;HMDB0033724	-	-	-	-	-	Lipids and lipid-like molecules	Fatty Acyls	Fatty acids and conjugates	0	56.8	-	-	1.0768	1.0826	0.001227	0.00199	3.9164	3.616	3.9636	4.0471	3.6137	3.3551	3.3702	3.3891	3.4352	3.3649
neg_5106	2-Methylidene-4-(oxiran-2-yl)butanoic Acid	metab_12302	yes	-	neg	-	329.124	5.66178	2M+FA-H	C7H10O3	0	48.2	HMDB0257753	-	-	-	-	-	Lipids and lipid-like molecules	Fatty Acyls	Fatty acids and conjugates	0	48.2	-	-	1.7389	1.7396	6.414e-08	1.616e-06	4.8556	4.9061	4.7922	4.9072	4.9273	3.9109	3.9881	3.7643	3.7565	3.9416
neg_5349	5-Hydroxyvalproic acid	metab_12570	yes	C16650	neg	53660-23-4	205.108	5.29868	M+FA-H	C8H16O3	0	54	PW_C008640;HMDB0013898	-	-	map00982	Metabolism	Xenobiotics biodegradation and metabolism	Lipids and lipid-like molecules	Fatty Acyls	Fatty acids and conjugates	0	54	Drug metabolism - cytochrome P450	Drug metabolism - cytochrome P450	1.2269	1.2319	0.0001326	0.0002785	2.9734	2.9689	2.9663	2.9807	2.9667	3.2425	3.7034	3.5462	3.6095	3.4482
neg_5434	Traumatin	metab_12665	yes	C16309	neg	65410-38-0	257.139	5.176	M+FA-H	C12H20O3	0	31.3	LMFA01060093;HMDB0037326	-	-	map00592;map01110	Metabolism;Metabolism	Lipid metabolism;Global and overview maps	Lipids and lipid-like molecules	Fatty Acyls	Fatty acids and conjugates	0	31.3	alpha-Linolenic acid metabolism;Biosynthesis of secondary metabolites	alpha-Linolenic acid metabolism;Biosynthesis of secondary metabolites	3.0071	3.0021	1.665e-10	2.837e-08	3.2883	3.1716	3.5096	3.3534	3.0794	0.2812	0.2884	0.2977	0.3213	0.2859
neg_5547	16-oxo-palmitate	metab_12790	yes	-	neg	-	314.209	5.00087	M+FA-H	C16H29O3-	0	32.8	HMDB0304028	-	-	-	-	-	Lipids and lipid-like molecules	Fatty Acyls	Fatty acids and conjugates	0	32.8	-	-	1.1287	1.1238	7.46e-06	2.702e-05	5.6337	5.5746	5.5673	5.4653	5.4808	5.0641	5.1095	5.1102	5.2176	5.0574
neg_5863	20-Carboxyleukotriene B4	metab_13140	yes	C05950	neg	80434-82-8	365.197	4.5145	M-H	C20H30O6	0	44.4	HMDB0245560;HMDB0012641;HMDB0006059	-	-	map00590	Metabolism	Lipid metabolism	Lipids and lipid-like molecules	Fatty Acyls	Fatty acids and conjugates	0	44.4	Arachidonic acid metabolism	Arachidonic acid metabolism	1.5102	1.5037	4.837e-10	6.368e-08	4.6929	4.766	4.7591	4.7837	4.8068	4.025	4.022	4.0056	4.034	3.9794
neg_662	Azelaic Acid	metab_13976	yes	C08261	neg	123-99-9	187.097	5.93923	M-H, M+Na-2H	C9H16O4	85.4	0	LMFA01170054;HMDB0000784;MJDBOTE0000344	-	-	-	-	-	Lipids and lipid-like molecules	Fatty Acyls	Fatty acids and conjugates	85.4	0	-	-	1.2081	1.1995	2.723e-06	1.218e-05	5.5543	5.5257	5.5594	5.5248	5.546	5.049	4.9721	5.1867	5.0911	4.9601
neg_878	Dethiobiotin	metab_15225	yes	C01909	neg	533-48-2	259.13	3.50128	M+Na-2H, M+FA-H	C10H18N2O3	0	55.3	HMDB0003581	-	-	map01100;map00780;map01240	Metabolism;Metabolism;Metabolism	Global and overview maps;Metabolism of cofactors and vitamins;Global and overview maps	Lipids and lipid-like molecules	Fatty Acyls	Fatty acids and conjugates	0	55.3	Metabolic pathways;Biotin metabolism;Biosynthesis of cofactors	Metabolic pathways;Biotin metabolism;Biosynthesis of cofactors	1.1167	1.1098	2.749e-07	2.013e-06	6.7865	6.7375	6.7147	6.6776	6.716	6.2524	6.3139	6.3439	6.3621	6.2889
pos_1103	13-(3-Methyl-5-pentylfuran-2-yl)tridecanoylcarnitine	metab_117	yes	-	pos	-	546.355	6.73472	M+H-H2O, M+K	C30H53NO5	0	35.7	HMDB0241806	-	-	-	-	-	Lipids and lipid-like molecules	Fatty Acyls	Fatty acid esters	0	35.7	-	-	1.0622	1.0522	1.754e-07	8.002e-06	7.6911	7.7783	7.7345	7.7715	7.7171	8.0168	8.0121	8.0273	8.0425	8.0242
pos_1283	(5Z,8Z,10E,14Z,17Z)-12-Hydroxyicosa-5,8,10,14,17-pentaenoylcarnitine	metab_315	yes	-	pos	-	462.32	6.10727	M+H, M+NH4	C27H43NO5	0	37.8	HMDB0241595	-	-	-	-	-	Lipids and lipid-like molecules	Fatty Acyls	Fatty acid esters	0	37.8	-	-	1.8324	1.8204	0.01733	0.02886	4.9619	4.7856	5.214	5.3934	5.3709	3.0861	4.7078	3.0829	4.5597	4.4897
pos_1352	4-Hydroxytetradecanedioylcarnitine	metab_392	yes	-	pos	-	418.28	5.99563	M+H-2H2O, M+H	C21H39NO7	0	49.2	HMDB0241424	-	-	-	-	-	Lipids and lipid-like molecules	Fatty Acyls	Fatty acid esters	0	49.2	-	-	2.8994	2.8765	1.505e-07	7.258e-06	3.8881	3.8474	3.8254	3.6209	3.9546	1.7021	1.9038	1.9946	1.4691	1.4331
pos_1401	3-Hydroxyoctanedioylcarnitine	metab_447	yes	-	pos	-	356.17	5.08175	M+Na, 2M+ACN+H	C15H27NO7	0	34.9	HMDB0241735	-	-	-	-	-	Lipids and lipid-like molecules	Fatty Acyls	Fatty acid esters	0	34.9	-	-	1.1564	1.1578	0.009395	0.01686	4.3297	4.3611	4.7643	4.8345	4.9608	5.1422	5.1241	5.0008	5.084	5.1228
pos_2701	Dodeca-8,10-dienedioylcarnitine	metab_1879	yes	-	pos	-	433.23	4.1006	M+ACN+Na	C19H31NO6	0	38.5	HMDB0241270	-	-	-	-	-	Lipids and lipid-like molecules	Fatty Acyls	Fatty acid esters	0	38.5	-	-	1.3315	1.3241	4.372e-05	0.0002035	5.1594	5.3492	5.0411	5.1112	5.097	4.7391	4.5972	4.6482	4.6928	4.7244
pos_2716	6-Hydroxytrtradeca-9,12-dienoylcarnitine	metab_1895	yes	-	pos	-	447.281	4.13265	M+ACN+Na	C21H37NO5	0	33.2	HMDB0241387	-	-	-	-	-	Lipids and lipid-like molecules	Fatty Acyls	Fatty acid esters	0	33.2	-	-	1.4074	1.4175	0.001085	0.002678	5.4681	5.0531	5.2974	4.9913	4.991	4.6134	4.46	4.4397	4.8045	4.6017
pos_29	Cervonoyl ethanolamide	metab_2096	yes	C13828	pos	-	355.263	6.17085	M+H-H2O, M+NH4, M+H, M+H-2H2O	C24H36O3	0	68.3	HMDB0013627	-	-	-	-	-	Lipids and lipid-like molecules	Fatty Acyls	Fatty acid esters	0	68.3	-	-	1.1227	1.1094	3.974e-07	1.31e-05	8.0834	8.0917	8.0143	8.0662	8.0868	7.7728	7.7696	7.7252	7.7808	7.6988
pos_3446	8-Hydroxytrtradeca-10,12-dienoylcarnitine	metab_2699	yes	-	pos	-	384.274	6.17085	M+H	C21H37NO5	0	49.9	HMDB0241388	-	-	-	-	-	Lipids and lipid-like molecules	Fatty Acyls	Fatty acid esters	0	49.9	-	-	1.3973	1.3867	4.624e-06	4.363e-05	5.6304	5.8275	5.6304	5.7776	5.6923	5.2385	5.1788	5.1483	5.286	5.1892
pos_3701	Eicosapentaenoic acid ethyl ester	metab_2976	yes	C16184	pos	86227-47-6	363.289	6.98888	M+CH3OH+H	C22H34O2	0	50.4	HMDB0249402;HMDB0039530	-	-	-	-	-	Lipids and lipid-like molecules	Fatty Acyls	Fatty acid esters	0	50.4	-	-	1.3177	1.3042	0.0009885	0.002484	5.3143	4.998	5.406	5.2602	5.3591	4.8397	4.5209	4.7898	4.9151	4.8001
pos_4359	Cetyl recinoleate	metab_3699	yes	-	pos	-	540.535	6.8541	M+NH4	C34H66O3	0	50.7	HMDB0249839	-	-	-	-	-	Lipids and lipid-like molecules	Fatty Acyls	Fatty acid esters	0	50.7	-	-	1.2134	1.2133	0.02705	0.04216	6.2048	6.1386	5.8726	5.6116	5.6882	5.6483	4.7545	5.3977	5.3811	5.6292
pos_4595	Alfaprostolum	metab_3960	yes	-	pos	-	429.261	6.50427	M+Na	C24H38O5	0	44	HMDB0248132	-	-	-	-	-	Lipids and lipid-like molecules	Fatty Acyls	Fatty acid esters	0	44	-	-	1.6419	1.6202	0.0001947	0.0006587	5.9419	5.9172	5.8958	5.8748	5.9235	5.3717	5.2562	5.0924	5.4001	4.7895
pos_5881	(4Z,6Z)-Octa-4,6-dienoylcarnitine	metab_5374	yes	-	pos	-	316.212	4.4632	M+CH3OH+H	C15H25NO4	0	37.6	HMDB0241719	-	-	-	-	-	Lipids and lipid-like molecules	Fatty Acyls	Fatty acid esters	0	37.6	-	-	1.6682	1.6551	6.974e-07	1.924e-05	4.3308	4.2068	4.2575	4.2689	4.2578	3.619	3.4603	3.7069	3.4762	3.5099
pos_6529	3-Hydroxynona-5,7-dienoylcarnitine	metab_6092	yes	-	pos	-	331.222	3.38418	M+NH4	C16H27NO5	0	54.1	HMDB0241770	-	-	-	-	-	Lipids and lipid-like molecules	Fatty Acyls	Fatty acid esters	0	54.1	-	-	1.2172	1.2209	0.009598	0.01719	3.1765	3.6348	3.3948	3.7263	3.0658	2.8478	2.8378	2.8315	3.1875	2.8419
pos_781	5-Hydroxyoct-2-enedioylcarnitine	metab_7454	yes	-	pos	-	314.159	5.49047	M+H-H2O, M+K	C15H25NO7	0	63.1	HMDB0241716	-	-	-	-	-	Lipids and lipid-like molecules	Fatty Acyls	Fatty acid esters	0	63.1	-	-	1.0298	1.021	1.14e-05	7.207e-05	4.6103	4.6634	4.6149	4.7331	4.6412	4.9788	4.9654	4.8889	4.9201	4.8946
pos_923	(10Z)-Pentadec-10-enoylcarnitine	metab_7610	yes	-	pos	-	425.341	6.50427	M+H-H2O, M+ACN+H	C22H41NO4	0	36.4	HMDB0241436	-	-	-	-	-	Lipids and lipid-like molecules	Fatty Acyls	Fatty acid esters	0	36.4	-	-	1.1043	1.1034	0.0224	0.03586	5.0751	5.0058	4.973	4.9987	5.0925	5.009	4.278	4.2717	4.8559	4.6021
neg_1530	(2Z)-dec-2-enedioylcarnitine	metab_8345	yes	-	neg	-	380.146	3.46212	M+K-2H	C17H29NO6	0	39.2	HMDB0241084	-	-	-	-	-	Lipids and lipid-like molecules	Fatty Acyls	Fatty acid esters	0	39.2	-	-	1.1529	1.1464	1.603e-06	8.187e-06	5.8969	5.7743	5.7995	5.7679	5.7965	5.3339	5.3136	5.3364	5.4663	5.358
neg_1558	(5E,7E)-Undeca-2,5,7-trienedioylcarnitine	metab_8375	yes	-	neg	-	374.157	3.49345	M+Na-2H	C18H27NO6	0	36.5	HMDB0241202	-	-	-	-	-	Lipids and lipid-like molecules	Fatty Acyls	Fatty acid esters	0	36.5	-	-	1.0199	1.0221	0.0002716	0.0005178	6.2638	6.0664	6.1553	5.9991	6.0852	5.6195	5.7206	5.7672	5.8719	5.7185
neg_2183	3-Hydroxytrideca-5,8-dienoylcarnitine	metab_9069	yes	-	neg	-	406.197	4.33607	M+K-2H	C20H35NO5	0	50.9	HMDB0241331	-	-	-	-	-	Lipids and lipid-like molecules	Fatty Acyls	Fatty acid esters	0	50.9	-	-	1.2387	1.2373	4.348e-05	0.0001097	5.8728	5.7395	5.6994	5.519	5.5798	5.1226	5.1276	5.1128	5.2456	5.1275
neg_2218	Tridec-8-enedioylcarnitine	metab_9107	yes	-	neg	-	422.193	4.39872	M+K-2H	C20H35NO6	0	61	HMDB0241319	-	-	-	-	-	Lipids and lipid-like molecules	Fatty Acyls	Fatty acid esters	0	61	-	-	1.4059	1.3957	7.471e-08	1.616e-06	5.1803	5.0401	5.0571	5.108	5.133	4.4178	4.4238	4.4568	4.5439	4.4143
neg_3511	12-Hydroxyheptadecanoylcarnitine	metab_10536	yes	-	neg	-	466.294	6.64845	M+K-2H	C24H47NO5	0	59.5	HMDB0241515	-	-	-	-	-	Lipids and lipid-like molecules	Fatty Acyls	Fatty acid esters	0	59.5	-	-	1.0868	1.0798	0.0007666	0.001309	6.4041	6.5917	6.2632	6.2068	6.1623	5.958	5.8574	5.8337	5.9589	5.8297
neg_4456	(5Z,7Z,10Z,13Z,16Z,19Z)-4-Hydroxydocosa-5,7,10,13,16,19-hexaenoylcarnitine	metab_11581	yes	-	neg	-	524.278	6.42168	M+K-2H	C29H45NO5	0	54.3	HMDB0241622	-	-	-	-	-	Lipids and lipid-like molecules	Fatty Acyls	Fatty acid esters	0	54.3	-	-	1.2145	1.211	8.112e-06	2.89e-05	7.248	7.15	7.1487	7.0322	7.0239	6.6244	6.584	6.585	6.7212	6.5731
neg_4527	(9Z)-12-Hydroxyoctadec-9-enoylcarnitine	metab_11660	yes	-	neg	-	462.323	6.3203	M+Na-2H	C25H47NO5	0	44	HMDB0241536	-	-	-	-	-	Lipids and lipid-like molecules	Fatty Acyls	Fatty acid esters	0	44	-	-	1.1103	1.1149	1.884e-05	5.622e-05	5.9723	5.9384	6.0074	6.0922	6.062	5.4854	5.675	5.6109	5.5124	5.6574
neg_4960	2-hydroxy-3-methylbutanedioylcarnitine	metab_12139	yes	-	neg	-	272.114	5.86867	M-H2O-H	C12H21NO7	0	46.9	HMDB0241030	-	-	-	-	-	Lipids and lipid-like molecules	Fatty Acyls	Fatty acid esters	0	46.9	-	-	1.518	1.5116	0.0009897	0.001639	2.2704	2.8001	2.3496	2.6318	2.2637	3.3308	3.5152	2.8153	3.4478	3.541
neg_5307	3-Hydroxytrideca-4,6-dienoylcarnitine	metab_12524	yes	-	neg	-	406.198	5.35013	M+K-2H	C20H35NO5	0	61.1	HMDB0241325	-	-	-	-	-	Lipids and lipid-like molecules	Fatty Acyls	Fatty acid esters	0	61.1	-	-	1.0726	1.0769	0.009358	0.01298	4.4487	3.9998	4.3017	4.2403	4.3279	3.9131	3.321	3.9402	3.6442	4.0035
neg_5655	(2E)-Undec-2-enedioylcarnitine	metab_12909	yes	-	neg	-	392.183	4.83355	M+Cl	C18H31NO6	0	58	HMDB0241174	-	-	-	-	-	Lipids and lipid-like molecules	Fatty Acyls	Fatty acid esters	0	58	-	-	1.0114	1.0075	5.57e-06	2.165e-05	5.0743	4.9821	4.9682	4.9944	4.9521	4.6738	4.5462	4.6774	4.6673	4.667
neg_5854	(3Z,5E,7E)-Decatrienoylcarnitine	metab_13130	yes	-	neg	-	330.167	4.52827	M+Na-2H	C17H27NO4	0	41	HMDB0241124	-	-	-	-	-	Lipids and lipid-like molecules	Fatty Acyls	Fatty acid esters	0	41	-	-	1.0825	1.0855	0.0001521	0.0003133	5.465	5.2595	5.4137	5.2633	5.2173	4.86	4.9059	4.8052	5.0444	4.9024
neg_6325	3-Hydroxydodeca-7,10-dienoylcarnitine	metab_13650	yes	-	neg	-	392.183	3.93453	M+K-2H	C19H33NO5	0	48.6	HMDB0241249	-	-	-	-	-	Lipids and lipid-like molecules	Fatty Acyls	Fatty acid esters	0	48.6	-	-	1.1076	1.1046	2.058e-05	6.031e-05	6.0968	5.9866	5.969	5.862	5.9072	5.4897	5.4969	5.5613	5.6324	5.5323
neg_725	(3E)-Glutaconylcarnitin	metab_14673	yes	-	neg	-	545.237	4.5361	M+Na-2H, 2M-H	C12H19NO6	0	49.4	HMDB0241662	-	-	-	-	-	Lipids and lipid-like molecules	Fatty Acyls	Fatty acid esters	0	49.4	-	-	1.7231	1.7103	4.368e-06	1.778e-05	5.3109	5.1912	5.247	5.2428	5.1261	4.1341	4.3026	4.2229	4.4892	3.9716
pos_6127	Digoxigenin monodigitoxoside	metab_5648	yes	-	pos	-	503.297	4.00333	M+H-H2O	C29H44O8	0	35.9	HMDB0060819	-	-	-	-	-	Organic oxygen compounds	Organooxygen compounds	Ethers	0	35.9	-	-	1.7022	1.6869	0.0001257	0.0004679	5.3143	5.1549	5.209	5.2346	5.2368	4.5202	4.2094	4.2712	4.8332	4.4186
pos_2578	Norethindrone	metab_1744	yes	C05028	pos	68-22-4	321.181	3.80997	M+Na	C20H26O2	0	36.7	LMST02030097;HMDB0014855	-	-	-	-	-	Lipids and lipid-like molecules	Steroids and steroid derivatives	Estrane steroids	0	36.7	-	-	2.4148	2.4638	0.005855	0.01123	3.9051	3.7459	4.0145	3.7611	3.7937	1.4893	1.0263	3.0191	1.0638	3.3412
pos_3048	17a-Ethynylestradiol	metab_2262	yes	C07534	pos	57-63-6	360.192	5.12177	M+ACN+Na	C20H24O2	0	61.6	HMDB0001926	-	-	-	-	-	Lipids and lipid-like molecules	Steroids and steroid derivatives	Estrane steroids	0	61.6	-	-	1.6969	1.6803	1.266e-06	2.781e-05	6.3885	6.2187	6.3248	6.2249	6.2897	5.5027	5.5038	5.4784	5.7394	5.5378
pos_4972	2-Methoxyestrone	metab_4375	yes	C05299	pos	362-08-3	639.303	6.07533	2M+K	C19H24O3	0	32.9	HMDB0000010;LMST02010033;PW_C000005	-	-	map00140	Metabolism	Lipid metabolism	Lipids and lipid-like molecules	Steroids and steroid derivatives	Estrane steroids	0	32.9	Steroid hormone biosynthesis	Steroid hormone biosynthesis	1.996	1.9747	5.076e-07	1.565e-05	5.0176	5.0805	5.0484	5.0168	5.3309	4.0533	4.2344	4.0369	4.0846	4.0473
pos_5023	19-Norandrostenedione	metab_4433	yes	C14500	pos	734-32-7	317.149	6.04348	M+2Na-H	C18H24O2	0	42.5	HMDB0244836	-	-	-	-	-	Lipids and lipid-like molecules	Steroids and steroid derivatives	Estrane steroids	0	42.5	-	-	1.4239	1.4218	0.004475	0.009009	4.3843	4.2121	3.7446	4.2562	4.1007	3.3221	3.8838	3.7008	3.3534	3.3161
pos_5243	17alpha-Methylestradiol	metab_4673	yes	C14483	pos	302-76-1	309.18	5.78803	M+Na	C19H26O2	0	31.7	HMDB0244778	-	-	-	-	-	Lipids and lipid-like molecules	Steroids and steroid derivatives	Estrane steroids	0	31.7	-	-	1.146	1.1329	0.001101	0.002707	4.1206	4.2765	4.0934	4.137	4.1038	3.9404	3.7507	3.5815	3.9047	3.6718
pos_845	2-Methoxyestriol	metab_7525	yes	-	pos	-	351.216	6.02748	M+H-H2O, M+CH3OH+H	C19H26O4	0	35.3	HMDB0245202	-	-	-	-	-	Lipids and lipid-like molecules	Steroids and steroid derivatives	Estrane steroids	0	35.3	-	-	1.3254	1.3151	2.832e-05	0.0001475	5.2402	5.3087	5.209	5.2396	5.2262	4.8722	4.8512	4.8653	4.7164	4.6113
neg_2598	Nivacortol	metab_9526	yes	-	neg	-	429.235	5.09412	M-H	C28H31FN2O	0	49.3	HMDB0255670	-	-	-	-	-	Lipids and lipid-like molecules	Steroids and steroid derivatives	Estrane steroids	0	49.3	-	-	1.1741	1.1673	1.072e-05	3.599e-05	5.7106	5.6225	5.6498	5.5863	5.6064	5.0776	5.1381	5.144	5.3326	5.1438
neg_5915	Estrone-2,3-quinone	metab_13198	yes	-	neg	40551-33-5	305.117	4.4443	M+Na-2H	C18H20O3	0	46.2	HMDB0012941	-	-	-	-	-	Lipids and lipid-like molecules	Steroids and steroid derivatives	Estrane steroids	0	46.2	-	-	1.0626	1.0698	0.0004291	0.0007772	5.1467	4.9064	5.0626	4.8513	4.8609	4.477	4.5089	4.535	4.7119	4.5226
neg_6054	16b-Hydroxyestrone	metab_13352	yes	C05300	neg	966-06-3	307.13	4.24135	M+Na-2H	C18H22O3	0	52.8	HMDB0000313;LMST02010046	Hormones and transmitters	Steroid hormones	map01100;map00140	Metabolism;Metabolism	Global and overview maps;Lipid metabolism	Lipids and lipid-like molecules	Steroids and steroid derivatives	Estrane steroids	0	52.8	Metabolic pathways;Steroid hormone biosynthesis	Metabolic pathways;Steroid hormone biosynthesis	2.4696	2.4617	7.258e-06	2.652e-05	5.1742	4.7158	5.1095	4.6841	4.9081	2.6332	2.6483	3.5462	2.7132	2.643
pos_5495	Ergosterol	metab_4949	yes	C01694	pos	57-87-4	441.307	5.25775	M+2Na-H	C28H44O	0	37.5	HMDB0000878;LMST01030093	Steroids	28-Carbon atoms	map01100;map01110;map00100	Metabolism;Metabolism;Metabolism	Global and overview maps;Global and overview maps;Lipid metabolism	Lipids and lipid-like molecules	Steroids and steroid derivatives	Ergostane steroids	0	37.5	Metabolic pathways;Biosynthesis of secondary metabolites;Steroid biosynthesis	Metabolic pathways;Biosynthesis of secondary metabolites;Steroid biosynthesis	1.1468	1.1405	0.0001837	0.000627	5.5387	5.301	5.4032	5.2617	5.3876	4.9681	4.9735	5.0321	5.1162	5.0111
pos_2962	Epothilone C	metab_2166	yes	C15694	pos	-	500.249	4.85707	M+Na	C26H39NO5S	0	75.9	HMDB0251875	-	-	-	-	-	Phenylpropanoids and polyketides	Macrolides and analogues	Epothilones and analogues	0	75.9	-	-	1.1431	1.1392	9.716e-05	0.0003816	4.5871	4.7712	4.755	4.807	4.8326	5.1234	5.1447	5.1657	5.0433	5.0515
neg_4706	Epothilone A	metab_11858	yes	C12153	neg	152044-53-6	492.243	6.04828	M-H	C26H39NO6S	0	52.7	HMDB0251873;LMPK04000040	-	-	map01052	Metabolism	Metabolism of terpenoids and polyketides	Phenylpropanoids and polyketides	Macrolides and analogues	Epothilones and analogues	0	52.7	Type I polyketide structures	Type I polyketide structures	1.1889	1.1845	3.128e-06	1.355e-05	5.9275	5.9124	6.0117	6.0614	5.9638	6.3349	6.4649	6.5253	6.4715	6.4688
pos_122	Butaprost	metab_245	yes	-	pos	-	391.284	6.27367	M+Na, 2M+Na, M+H-H2O	C24H40O5	0	49.4	HMDB0249457	-	-	-	-	-	Lipids and lipid-like molecules	Fatty Acyls	Eicosanoids	0	49.4	-	-	1.3117	1.2954	1.21e-06	2.695e-05	7.2059	7.1587	7.0986	7.1297	7.1649	6.7443	6.733	6.6881	6.7852	6.6167
pos_1246	Ciprostene	metab_274	yes	-	pos	-	387.252	6.23418	M+NH4, M+Na	C22H36O4	0	69.8	HMDB0250270	-	-	-	-	-	Lipids and lipid-like molecules	Fatty Acyls	Eicosanoids	0	69.8	-	-	1.0473	1.0374	2.808e-06	4.363e-05	6.8275	6.8991	6.7905	6.8652	6.8422	6.5902	6.5856	6.5249	6.5935	6.5237
pos_3337	11-trans-LTE4	metab_2580	yes	-	pos	-	404.228	5.94782	M+H-2H2O	C23H37NO5S	0	33.6	HMDB0062286;LMFA03020022	-	-	-	-	-	Lipids and lipid-like molecules	Fatty Acyls	Eicosanoids	0	33.6	-	-	1.0818	1.0774	0.001368	0.00326	4.5206	4.7785	4.6853	4.7346	4.7217	4.9016	5.1025	4.9394	5.2083	5.0011
pos_472	Leukotriene E3	metab_4096	yes	-	pos	79494-05-6	442.266	2.93752	M+H, M+Na	C23H39NO5S	0	33.1	LMFA03020074;HMDB0002355	-	-	-	-	-	Lipids and lipid-like molecules	Fatty Acyls	Eicosanoids	0	33.1	-	-	1.12	1.1088	9.254e-06	6.142e-05	7.2588	7.2248	7.1586	7.1354	7.167	6.8828	6.8524	6.8299	6.944	6.8072
pos_5290	Iloprost R-isomer	metab_4724	yes	-	pos	-	399.192	5.69948	M+K	C22H32O4	0	51.8	HMDB0259545	-	-	-	-	-	Lipids and lipid-like molecules	Fatty Acyls	Eicosanoids	0	51.8	-	-	1.5169	1.5008	1.811e-05	0.0001034	4.6905	4.5672	4.6557	4.6021	4.6474	4.2225	3.8771	3.9127	4.1027	4.0388
pos_5428	Prostaglandin PGE2 glyceryl ester	metab_4877	yes	-	pos	-	490.276	5.38645	M+ACN+Na	C23H38O7	0	41.8	HMDB0013045	-	-	-	-	-	Lipids and lipid-like molecules	Fatty Acyls	Eicosanoids	0	41.8	-	-	1.0808	1.0701	3.538e-05	0.000174	5.0969	5.0698	5.0344	4.9622	5.0553	4.7555	4.74	4.646	4.8276	4.71
pos_5688	11,12-DiHETrE	metab_5160	yes	C14774	pos	192461-95-3	402.263	4.85707	M+ACN+Na	C20H34O4	0	74.1	HMDB0002314;PW_C001562	-	-	map00590;map01100;map04726	Metabolism;Metabolism;Organismal Systems	Lipid metabolism;Global and overview maps;Nervous system	Lipids and lipid-like molecules	Fatty Acyls	Eicosanoids	0	74.1	Arachidonic acid metabolism;Metabolic pathways;Serotonergic synapse	Arachidonic acid metabolism;Metabolic pathways;Serotonergic synapse	1.0562	1.047	0.009531	0.01709	3.2733	3.5894	3.5191	3.6225	3.3109	3.1174	2.9368	3.0499	3.395	2.9951
pos_793	Prostaglandin E3	metab_7467	yes	C06439	pos	802-31-3	315.195	5.61958	M+H-2H2O, M+H	C20H30O5	0	36.2	LMFA03010135;HMDB0247474;HMDB0002664	Lipids	Eicosanoids	-	-	-	Lipids and lipid-like molecules	Fatty Acyls	Eicosanoids	0	36.2	-	-	1.4282	1.424	5.354e-07	1.62e-05	4.6442	4.704	4.6972	4.7731	4.786	4.259	4.2275	4.171	4.1214	4.2331
neg_3576	11,12-Epoxyeicosatrienoic acid	metab_10607	yes	C14770	neg	123931-40-8;81276-02-0	365.236	6.81252	M+FA-H	C20H32O3	0	59.6	PW_C002170;HMDB0004673;HMDB0244445;LMFA03090011	-	-	map00590;map01100;map04913;map04270;map04726	Metabolism;Metabolism;Organismal Systems;Organismal Systems;Organismal Systems	Lipid metabolism;Global and overview maps;Endocrine system;Circulatory system;Nervous system	Lipids and lipid-like molecules	Fatty Acyls	Eicosanoids	0	59.6	Arachidonic acid metabolism;Metabolic pathways;Ovarian steroidogenesis;Vascular smooth muscle contraction;Serotonergic synapse	Arachidonic acid metabolism;Metabolic pathways;Ovarian steroidogenesis;Vascular smooth muscle contraction;Serotonergic synapse	1.6564	1.6461	3.765e-07	2.596e-06	5.1425	5.3328	5.2225	5.3031	5.3357	4.4892	4.242	4.2813	4.4466	4.3282
neg_391	6-Keto-prostaglandin F1a	metab_10975	yes	C05961	neg	58962-34-8	351.218	5.93142	M-H2O-H, M-H	C20H34O6	0	34.4	PW_C001726;HMDB0002886	-	-	map00590;map01100	Metabolism;Metabolism	Lipid metabolism;Global and overview maps	Lipids and lipid-like molecules	Fatty Acyls	Eicosanoids	0	34.4	Arachidonic acid metabolism;Metabolic pathways	Arachidonic acid metabolism;Metabolic pathways	1.5929	1.5861	6.196e-10	7.801e-08	5.6576	5.6164	5.6446	5.5909	5.7231	4.8435	4.8164	4.7832	4.8195	4.7981
neg_4179	12(S)-HETrE	metab_11274	yes	-	neg	-	643.494	6.92162	2M-H	C20H34O3	0	67.4	HMDB0062747	-	-	-	-	-	Lipids and lipid-like molecules	Fatty Acyls	Eicosanoids	0	67.4	-	-	1.5609	1.5595	0.0002933	0.000554	5.7519	5.5066	5.4489	5.1429	5.2704	4.7938	4.246	4.7417	4.4563	4.4466
neg_4319	13,14-Dihydro-15-keto-PGE2	metab_11429	yes	C04671	neg	363-23-5	351.221	6.60152	M-H	C20H32O5	70.3	0	LMFA03010031;HMDB0002776	-	-	-	-	-	Lipids and lipid-like molecules	Fatty Acyls	Eicosanoids	70.3	0	-	-	1.5017	1.4937	1.786e-07	1.616e-06	6.4641	6.6475	6.4203	6.5333	6.5456	5.8404	5.7939	5.7834	5.7635	5.7001
neg_4530	10,11-dihydro-20-trihydroxy-leukotriene B4	metab_11664	yes	-	neg	-	385.223	6.3203	M-H	C20H34O7	0	73.6	HMDB0012503;LMFA03020044	-	-	-	-	-	Lipids and lipid-like molecules	Fatty Acyls	Eicosanoids	0	73.6	-	-	1.4715	1.4616	2.23e-08	1.05e-06	7.6905	7.6921	7.6878	7.6807	7.6815	6.9611	6.9412	6.9127	7.1011	6.9502
neg_4750	Prostaglandin B2	metab_11907	yes	C05954	neg	13367-85-6	379.213	6.0095	M+FA-H	C20H30O4	0	65.4	HMDB0004236;LMFA03010018;PW_C002099	Lipids	Eicosanoids	map00590;map01100;map04726	Metabolism;Metabolism;Organismal Systems	Lipid metabolism;Global and overview maps;Nervous system	Lipids and lipid-like molecules	Fatty Acyls	Eicosanoids	0	65.4	Arachidonic acid metabolism;Metabolic pathways;Serotonergic synapse	Arachidonic acid metabolism;Metabolic pathways;Serotonergic synapse	1.0953	1.095	0.002475	0.003784	4.9579	4.4297	4.6371	4.4415	4.8558	4.1687	4.1838	4.2028	4.2489	4.1785
neg_4828	6-Ketoprostaglandin E1	metab_11993	yes	C05962	neg	67786-53-2	413.218	5.94705	M+FA-H	C20H32O6	0	54.4	HMDB0004241;PW_C002103	-	-	map00590;map01100	Metabolism;Metabolism	Lipid metabolism;Global and overview maps	Lipids and lipid-like molecules	Fatty Acyls	Eicosanoids	0	54.4	Arachidonic acid metabolism;Metabolic pathways	Arachidonic acid metabolism;Metabolic pathways	1.6467	1.6368	6.057e-08	1.616e-06	5.6889	5.8765	5.6229	5.7899	5.6848	4.8102	4.8253	4.8442	4.8904	4.82
neg_4830	10-hydroxy-11S,12S-epoxy-5Z,8Z,14Z-eicosatrienoic acid	metab_11996	yes	C14810	neg	-	381.228	5.94705	M+FA-H	C20H32O4	0	32.6	HMDB0062479;LMFA03090003	-	-	map00590	Metabolism	Lipid metabolism	Lipids and lipid-like molecules	Fatty Acyls	Eicosanoids	0	32.6	Arachidonic acid metabolism	Arachidonic acid metabolism	1.4726	1.4594	1.707e-06	8.58e-06	5.8243	5.8452	5.7451	5.7543	5.8243	4.9579	5.2039	5.1002	5.1768	4.9379
neg_4868	15-Keto-prostaglandin F2a	metab_12037	yes	C05960	neg	35850-13-6	397.223	5.92348	M+FA-H	C20H32O5	0	40.5	HMDB0004240	-	-	map00590	Metabolism	Lipid metabolism	Lipids and lipid-like molecules	Fatty Acyls	Eicosanoids	0	40.5	Arachidonic acid metabolism	Arachidonic acid metabolism	2.1192	2.1153	5.948e-07	3.777e-06	5.0047	4.4463	4.7059	4.7243	4.9102	3.1867	3.2839	3.3237	3.106	3.3494
neg_5016	5(6)-Epoxy Prostaglandin E1	metab_12202	yes	C04741	neg	-	413.218	5.80632	M+FA-H	C20H32O6	0	51.7	HMDB0012110;LMFA03020068	Lipids	Eicosanoids	-	-	-	Lipids and lipid-like molecules	Fatty Acyls	Eicosanoids	0	51.7	-	-	1.7762	1.7673	4.238e-08	1.578e-06	5.6685	5.866	5.7312	5.8417	5.7647	4.7815	4.7975	4.646	4.8056	4.6367
neg_5696	11-Dehydro-thromboxane B2	metab_12954	yes	C05964	neg	67910-12-7	367.212	4.76547	M-H	C20H32O6	0	42.2	PW_C002104;LMFA03030004;HMDB0004242;LMFA03030014;HMDB0244347	Lipids	Eicosanoids	map00590;map01100;map04726	Metabolism;Metabolism;Organismal Systems	Lipid metabolism;Global and overview maps;Nervous system	Lipids and lipid-like molecules	Fatty Acyls	Eicosanoids	0	42.2	Arachidonic acid metabolism;Metabolic pathways;Serotonergic synapse	Arachidonic acid metabolism;Metabolic pathways;Serotonergic synapse	1.6857	1.6764	5.583e-06	2.169e-05	3.9595	3.4643	3.5102	3.5703	3.7252	2.6554	2.6705	2.6894	2.7354	2.6652
neg_6469	20-Hydroxy-leukotriene E4	metab_13809	yes	C03577	neg	111844-33-8	500.236	3.793	M+FA-H	C23H37NO6S	0	80.6	LMFA03020062;HMDB0012639;LMFA03020025	-	-	map00590	Metabolism	Lipid metabolism	Lipids and lipid-like molecules	Fatty Acyls	Eicosanoids	0	80.6	Arachidonic acid metabolism	Arachidonic acid metabolism	1.3117	1.3034	1.392e-05	4.403e-05	6.5488	6.3582	6.5131	6.4228	6.5165	5.8152	5.8205	5.8379	6.0897	5.868
neg_5641	Prostaglandin J2	metab_15388	yes	C05957	neg	87893-54-7;60203-57-8	355.187	4.86442	M+Na-2H	C20H30O4	0	51.6	HMDB0002710;HMDB0004238;HMDB0247117;PW_C001687;LMFA03010019	Lipids	Eicosanoids	map00590;map01100;map04726	Metabolism;Metabolism;Organismal Systems	Lipid metabolism;Global and overview maps;Nervous system	Lipids and lipid-like molecules	Fatty Acyls	Eicosanoids	0	51.6	Arachidonic acid metabolism;Metabolic pathways;Serotonergic synapse	Arachidonic acid metabolism;Metabolic pathways;Serotonergic synapse	1.0173	1.0341	0.01462	0.01976	2.1178	2.6506	1.7858	2.2799	2.4438	2.8278	2.5856	2.6944	2.7224	2.8378
pos_1075	Diterpene alkaloid	metab_85	yes	-	pos	-	406.295	7.7755	M+H-H2O, M+H	C24H39NO4	0	58.7	HMDB0251489	-	-	-	-	-	Lipids and lipid-like molecules	Prenol lipids	Diterpenoids	0	58.7	-	-	1.3221	1.286	0.01742	0.02897	3.6595	4.0313	4.414	3.8343	3.3252	4.4702	4.506	4.5814	4.1916	4.4078
pos_1263	Lactapiperanol C	metab_293	yes	-	pos	243447-93-0	247.169	6.19475	M+H-2H2O, M+Na	C16H26O4	0	55.9	HMDB0033630	-	-	-	-	-	Lipids and lipid-like molecules	Prenol lipids	Diterpenoids	0	55.9	-	-	1.0834	1.074	7.446e-06	5.189e-05	5.7872	5.8317	5.7581	5.8436	5.8338	5.496	5.5953	5.4682	5.524	5.4554
pos_31	Cavipetin C	metab_2319	yes	-	pos	128552-90-9	371.258	6.10727	M+H-H2O, M+Na, M+NH4, M+H-2H2O	C24H36O4	0	57	HMDB0030366	-	-	-	-	-	Lipids and lipid-like molecules	Prenol lipids	Diterpenoids	0	57	-	-	1.1907	1.1821	1.461e-08	1.635e-06	6.8103	6.8624	6.7716	6.8233	6.8151	6.4676	6.4751	6.4512	6.4629	6.442
pos_3679	Sclareol	metab_2951	yes	C09183	pos	515-03-7	326.305	6.86208	M+NH4	C20H36O2	0	70.7	LMPR0104030010;HMDB0036827;MJDBOTE0001479	-	-	map01110;map00904	Metabolism;Metabolism	Global and overview maps;Metabolism of terpenoids and polyketides	Lipids and lipid-like molecules	Prenol lipids	Diterpenoids	0	70.7	Biosynthesis of secondary metabolites;Diterpenoid biosynthesis	Biosynthesis of secondary metabolites;Diterpenoid biosynthesis	1.0123	0.9925	0.01246	0.02162	5.572	5.3657	5.7285	5.7094	5.8608	5.3689	5.3737	5.4727	5.2315	5.1241
pos_4856	Antroquinonol	metab_4246	yes	-	pos	-	413.266	6.1868	M+Na	C24H38O4	0	30.1	HMDB0248495	-	-	-	-	-	Lipids and lipid-like molecules	Prenol lipids	Diterpenoids	0	30.1	-	-	1.5534	1.5428	1.143e-06	2.649e-05	5.7113	5.6931	5.6497	5.6352	5.6332	5.1857	4.9236	5.0684	4.9798	5.0715
pos_5321	Valnemulin	metab_4759	yes	C12066	pos	101312-92-9	609.328	5.62757	M+2Na-H	C31H52N2O5S	0	35.8	HMDB0259752	-	-	-	-	-	Lipids and lipid-like molecules	Prenol lipids	Diterpenoids	0	35.8	-	-	1.3814	1.3759	0.0004562	0.001304	4.383	4.4507	4.3371	4.5314	4.5759	4.849	5.0054	5.0763	4.7747	5.2384
pos_5351	Gibberellin A9	metab_4792	yes	C11863	pos	427-77-0	361.139	5.5551	M+2Na-H	C19H24O4	0	40.6	LMPR0104170020;HMDB0303451	-	-	map01100;map00904;map01110	Metabolism;Metabolism;Metabolism	Global and overview maps;Metabolism of terpenoids and polyketides;Global and overview maps	Lipids and lipid-like molecules	Prenol lipids	Diterpenoids	0	40.6	Metabolic pathways;Diterpenoid biosynthesis;Biosynthesis of secondary metabolites	Metabolic pathways;Diterpenoid biosynthesis;Biosynthesis of secondary metabolites	1.2295	1.2178	1.002e-06	2.397e-05	4.5383	4.6034	4.5617	4.6679	4.5976	4.9156	5.0178	5.0125	4.9597	4.997
pos_5665	Gibberellin A34-catabolite	metab_5135	yes	C11869	pos	-	364.175	4.91308	M+NH4	C19H22O6	0	79	LMPR0104170026;HMDB0304361	-	-	map00904	Metabolism	Metabolism of terpenoids and polyketides	Lipids and lipid-like molecules	Prenol lipids	Diterpenoids	0	79	Diterpenoid biosynthesis	Diterpenoid biosynthesis	3.0651	3.0304	0.0002657	0.0008446	0.5946	2.6655	0.5985	0.6133	0.6112	3.7448	3.5984	3.6185	3.3644	3.6358
pos_928	3-Epiaphidicolin	metab_7615	yes	-	pos	-	361.235	6.56792	M+NH4, M+Na	C20H34O4	0	43.5	HMDB0245864	-	-	-	-	-	Lipids and lipid-like molecules	Prenol lipids	Diterpenoids	0	43.5	-	-	2.0827	2.1023	0.04631	0.06686	3.3001	2.6915	2.5981	2.6176	2.6148	3.0013	5.097	5.7274	2.5277	5.7415
neg_3074	3-hydroxypristanic acid	metab_10053	yes	-	neg	-	351.228	5.9	M+K-2H	C19H38O3	0	32.8	HMDB0061651	-	-	-	-	-	Lipids and lipid-like molecules	Prenol lipids	Diterpenoids	0	32.8	-	-	1.8086	1.8353	0.004352	0.006369	3.4048	3.3809	3.3074	3.3352	3.5713	2.6976	1.2082	2.6668	1.2696	2.4566
neg_4586	(3beta,17alpha,23S)-17,23-Epoxy-3,28,29-trihydroxy-27-norlanost-8-en-24-one	metab_11725	yes	-	neg	-	519.335	6.24258	M+FA-H	C29H46O5	0	66.5	HMDB0035221	-	-	-	-	-	Lipids and lipid-like molecules	Prenol lipids	Diterpenoids	0	66.5	-	-	1.6012	1.593	3.071e-08	1.289e-06	5.4891	5.484	5.616	5.5395	5.6823	4.6879	4.703	4.722	4.7681	4.6977
neg_5063	Gibberellin A24	metab_12254	yes	C11861	neg	19427-32-8	383.128	5.73232	M+K-2H	C20H26O5	0	46	LMPR0104170018;HMDB0303459	-	-	map01100;map00904;map01110	Metabolism;Metabolism;Metabolism	Global and overview maps;Metabolism of terpenoids and polyketides;Global and overview maps	Lipids and lipid-like molecules	Prenol lipids	Diterpenoids	0	46	Metabolic pathways;Diterpenoid biosynthesis;Biosynthesis of secondary metabolites	Metabolic pathways;Diterpenoid biosynthesis;Biosynthesis of secondary metabolites	1.5252	1.5196	9.553e-09	5.95e-07	6.7439	6.7715	6.732	6.6763	6.7906	6.069	5.9212	5.9448	5.9635	5.9759
neg_5411	Gibberellin A12	metab_12640	yes	C11857	neg	1164-45-0	377.196	5.21423	M+FA-H	C20H28O4	0	41	HMDB0303453;LMPR0104170014;HMDB0301912	-	-	map01100;map00904;map01110	Metabolism;Metabolism;Metabolism	Global and overview maps;Metabolism of terpenoids and polyketides;Global and overview maps	Lipids and lipid-like molecules	Prenol lipids	Diterpenoids	0	41	Metabolic pathways;Diterpenoid biosynthesis;Biosynthesis of secondary metabolites	Metabolic pathways;Diterpenoid biosynthesis;Biosynthesis of secondary metabolites	1.2466	1.2366	0.0001748	0.0003521	4.7006	4.7283	4.6867	4.4076	4.3701	5.102	5.22	5.164	5.059	5.0846
neg_5444	Crocin 4	metab_12676	yes	C00744	neg	55750-86-2	503.232	5.15443	M-H	C27H36O9	0	32.6	HMDB0039122	-	-	map01100;map00522;map01110	Metabolism;Metabolism;Metabolism	Global and overview maps;Metabolism of terpenoids and polyketides;Global and overview maps	Lipids and lipid-like molecules	Prenol lipids	Diterpenoids	0	32.6	Metabolic pathways;Biosynthesis of 12-, 14- and 16-membered macrolides;Biosynthesis of secondary metabolites	Metabolic pathways;Biosynthesis of 12-, 14- and 16-membered macrolides;Biosynthesis of secondary metabolites	1.3896	1.3835	3.246e-06	1.398e-05	4.5549	4.6975	4.5603	4.6258	4.7349	4.0981	4.0804	3.9017	3.966	3.8852
neg_5649	(24E)-3alpha-Acetoxy-15alpha-hydroxy-23-oxo-7,9(11),24-lanostatrien-26-oic acid	metab_12902	yes	-	neg	117383-37-6	547.3	4.84137	M+Na-2H	C32H46O6	0	44.3	HMDB0035386	-	-	-	-	-	Lipids and lipid-like molecules	Prenol lipids	Diterpenoids	0	44.3	-	-	1.3917	1.3854	5.719e-05	0.0001377	5.3121	4.9015	5.2991	5.2645	5.2526	4.5098	4.4861	4.5645	4.6705	4.4178
neg_6074	Gibberellins	metab_13374	yes	C01699	neg	1977-06-05	383.092	4.21782	M+K-2H	C19H22O6	0	37	HMDB0003559;HMDB0252716	-	-	map01110;map00904	Metabolism;Metabolism	Global and overview maps;Metabolism of terpenoids and polyketides	Lipids and lipid-like molecules	Prenol lipids	Diterpenoids	0	37	Biosynthesis of secondary metabolites;Diterpenoid biosynthesis	Biosynthesis of secondary metabolites;Diterpenoid biosynthesis	2.1193	2.1148	7.605e-08	1.616e-06	4.7954	4.7942	4.9005	4.8886	4.8856	3.2533	3.6641	3.2873	3.3334	3.2631
neg_6142	7-Hydroxymitragynine	metab_13450	yes	-	neg	-	459.21	4.13948	M+FA-H	C23H30N2O5	0	41.7	HMDB0247263	-	-	-	-	-	Lipids and lipid-like molecules	Prenol lipids	Diterpenoids	0	41.7	-	-	1.2044	1.1983	1.025e-05	3.465e-05	5.5293	5.4867	5.4368	5.4048	5.3299	4.9769	4.9521	4.8686	5.0605	4.8572
neg_7561	Tanshinol A	metab_15015	yes	-	neg	-	313.05	0.76575	M+Na-2H	C18H12O4	0	36.5	HMDB0258713	-	-	-	-	-	Lipids and lipid-like molecules	Prenol lipids	Diterpenoids	0	36.5	-	-	1.8318	1.8226	1.724e-06	8.64e-06	4.9767	4.7043	4.7989	4.7058	4.8108	3.4912	3.8177	3.5007	3.8563	3.6907
pos_3719	DG(20:2(11Z,14Z)/18:4(6Z,9Z,12Z,15Z)/0:0)	metab_2995	yes	C00165	pos	-	641.511	7.0682	M+H	C41H68O5	0	68.2	PW_C003476;HMDB0007425	-	-	map05214;map05167;map04650;map05163;map04750;map05235;map04015;map04014;map04659;map04540;map04010;map04012;map05022;map04370;map04371;map04072;map04071;map04975;map05143;map05012;map05231;map05146;map04919;map05200;map04961;map04745;map04921;map04920;map04923;map04925;map05017;map04625;map04929;map04726;map04725;map04724;map04723;map04722;map05223;map04720;map04666;map05170;map04664;map04658;map…	Human Diseases;Human Diseases;Organismal Systems;Human Diseases;Organismal Systems;Human Diseases;Environmental Information Processing;Environmental Information Processing;Organismal Systems;Cellular Processes;Environmental Information Processing;Environmental Information Processing;Human Diseases;Environmental Information Processing;Environmental Information Processing;Environmental Information …	Cancer: specific types;Infectious disease: viral;Immune system;Infectious disease: viral;Sensory system;Cancer: overview;Signal transduction;Signal transduction;Immune system;Cellular community - eukaryotes;Signal transduction;Signal transduction;Neurodegenerative disease;Signal transduction;Signal transduction;Signal transduction;Signal transduction;Digestive system;Infectious disease: parasitic…	Lipids and lipid-like molecules	Glycerolipids	Diradylglycerols	0	68.2	Glioma;Kaposi sarcoma-associated herpesvirus infection;Natural killer cell mediated cytotoxicity;Human cytomegalovirus infection;Inflammatory mediator regulation of TRP channels;PD-L1 expression and PD-1 checkpoint pathway in cancer;Rap1 signaling pathway;Ras signaling pathway;Th17 cell differentiation;Gap junction;MAPK signaling pathway;ErbB signaling pathway;Pathways of neurodegeneration - mult…	Glioma;Kaposi sarcoma-associated herpesvirus infection;Natural killer cell mediated cytotoxicity;Human cytomegalovirus infection;Inflammatory mediator regulation of TRP channels;PD-L1 expression and PD-1 checkpoint pathway in cancer;Rap1 signaling pathway;Ras signaling pathway;Th17 cell differentiation;Gap junction;MAPK signaling pathway;ErbB signaling pathway;Pathways of neurodegeneration - mult…	1.4063	1.3943	1.067e-06	2.522e-05	6.3356	6.4821	6.3395	6.363	6.4172	5.9644	5.8731	5.7985	5.8954	5.8843
pos_3764	DG(20:1(11Z)/16:1(9Z)/0:0)	metab_3043	yes	C00165	pos	-	643.526	7.27513	M+Na	C39H72O5	0	93.6	PW_C003440;HMDB0007389	-	-	map05214;map05167;map04650;map05163;map04750;map05235;map04015;map04014;map04659;map04540;map04010;map04012;map05022;map04370;map04371;map04072;map04071;map04975;map05143;map05012;map05231;map05146;map04919;map05200;map04961;map04745;map04921;map04920;map04923;map04925;map05017;map04625;map04929;map04726;map04725;map04724;map04723;map04722;map05223;map04720;map04666;map05170;map04664;map04658;map…	Human Diseases;Human Diseases;Organismal Systems;Human Diseases;Organismal Systems;Human Diseases;Environmental Information Processing;Environmental Information Processing;Organismal Systems;Cellular Processes;Environmental Information Processing;Environmental Information Processing;Human Diseases;Environmental Information Processing;Environmental Information Processing;Environmental Information …	Cancer: specific types;Infectious disease: viral;Immune system;Infectious disease: viral;Sensory system;Cancer: overview;Signal transduction;Signal transduction;Immune system;Cellular community - eukaryotes;Signal transduction;Signal transduction;Neurodegenerative disease;Signal transduction;Signal transduction;Signal transduction;Signal transduction;Digestive system;Infectious disease: parasitic…	Lipids and lipid-like molecules	Glycerolipids	Diradylglycerols	0	93.6	Glioma;Kaposi sarcoma-associated herpesvirus infection;Natural killer cell mediated cytotoxicity;Human cytomegalovirus infection;Inflammatory mediator regulation of TRP channels;PD-L1 expression and PD-1 checkpoint pathway in cancer;Rap1 signaling pathway;Ras signaling pathway;Th17 cell differentiation;Gap junction;MAPK signaling pathway;ErbB signaling pathway;Pathways of neurodegeneration - mult…	Glioma;Kaposi sarcoma-associated herpesvirus infection;Natural killer cell mediated cytotoxicity;Human cytomegalovirus infection;Inflammatory mediator regulation of TRP channels;PD-L1 expression and PD-1 checkpoint pathway in cancer;Rap1 signaling pathway;Ras signaling pathway;Th17 cell differentiation;Gap junction;MAPK signaling pathway;ErbB signaling pathway;Pathways of neurodegeneration - mult…	1.5415	1.5313	9.828e-05	0.000385	5.5704	5.8133	5.3804	5.5629	5.5927	5.1545	4.9727	4.9154	4.85	4.8473
neg_3408	7a,12a-Dihydroxy-5b-cholestan-3-one	metab_10422	yes	C05453	neg	-	463.343	6.46068	M+FA-H	C27H46O3	0	30.7	HMDB0006887;PW_C002989	-	-	map01100;map00120	Metabolism;Metabolism	Global and overview maps;Lipid metabolism	Lipids and lipid-like molecules	Glycerolipids	Diradylglycerols	0	30.7	Metabolic pathways;Primary bile acid biosynthesis	Metabolic pathways;Primary bile acid biosynthesis	1.4424	1.4397	0.0005993	0.001049	4.8578	4.0612	4.6643	4.7115	4.7546	3.8467	3.8153	3.8343	3.8804	3.81
neg_4806	11-Oxo-androsterone glucuronide	metab_11969	yes	-	neg	-	479.228	5.95487	M-H	C25H36O9	0	46.1	LMST05010032;HMDB0010338	-	-	-	-	-	Lipids and lipid-like molecules	Glycerolipids	Diradylglycerols	0	46.1	-	-	1.8916	1.8769	1.851e-06	9.16e-06	5.2473	5.5872	5.2441	5.3273	5.3136	4.013	4.3546	4.0471	4.3047	4.0228
pos_3102	Silux	metab_2323	yes	C14511	pos	-	530.279	5.28977	M+NH4	C29H36O8	0	42.7	HMDB0249239	-	-	-	-	-	Benzenoids	Benzene and substituted derivatives	Diphenylmethanes	0	42.7	-	-	1.3092	1.2966	1.182e-05	7.419e-05	5.1156	5.1149	5.2982	5.3272	5.2415	5.6915	5.664	5.6296	5.6453	5.7011
neg_5502	Mepenzolate	metab_12741	yes	C07818	neg	25990-43-6	725.385	5.07205	2M+FA-H	C21H26NO3+	0	45	HMDB0015591	-	-	-	-	-	Benzenoids	Benzene and substituted derivatives	Diphenylmethanes	0	45	-	-	1.1589	1.1528	1.81e-07	1.616e-06	6.7683	6.7654	6.682	6.6748	6.651	6.2541	6.2718	6.2496	6.3006	6.2335
neg_6825	Difenoxin	metab_14203	yes	C07871	neg	28782-42-5	445.194	3.42228	M+Na-2H	C28H28N2O2	0	49.1	HMDB0251256	-	-	-	-	-	Benzenoids	Benzene and substituted derivatives	Diphenylacetonitriles	0	49.1	-	-	1.0179	1.0141	1.563e-06	8.035e-06	6.3228	6.2281	6.2571	6.2336	6.2177	5.8715	5.9066	5.8512	5.9708	5.9153
pos_3360	Candoxatrilat	metab_2605	yes	C11721	pos	123898-42-0	432.259	5.98768	M+CH3OH+H	C20H33NO7	0	54.7	HMDB0249582	-	-	-	-	-	Organic acids and derivatives	Carboxylic acids and derivatives	Dicarboxylic acids and derivatives	0	54.7	-	-	1.0723	1.0506	0.02745	0.0427	4.2026	4.4077	3.8793	4.5257	4.336	4.0511	3.6741	4.0872	3.9353	3.5806
neg_365	Clozapine	metab_10689	yes	C06924	neg	5786-21-0	371.128	5.69313	M-H2O-H, M+FA-H	C18H19ClN4	0	35	HMDB0014507	-	-	-	-	-	Organoheterocyclic compounds	Benzodiazepines	Dibenzodiazepines	0	35	-	-	1.262	1.2518	3.621e-07	2.524e-06	5.7606	5.8023	5.7815	5.8101	5.9303	5.321	5.2471	5.2604	5.3441	5.2787
pos_5091	Clomipramine	metab_4505	yes	C06918	pos	303-49-1	332.188	5.98768	M+NH4	C19H23ClN2	53.2	0	PW_C009649;HMDB0015372	-	-	-	-	-	Organoheterocyclic compounds	Benzazepines	Dibenzazepines	53.2	0	-	-	1.1303	1.1242	0.01089	0.01921	3.9451	4.1539	3.4775	3.812	3.8935	3.3757	3.6847	3.3593	3.407	3.3697
neg_3141	Hydroxydestruxin B	metab_10127	yes	-	neg	-	646.327	5.95487	M+K-2H	C30H51N5O8	0	86.9	HMDB0040135	-	-	-	-	-	Organic acids and derivatives	Peptidomimetics	Depsipeptides	0	86.9	-	-	1.0877	1.0949	0.0007613	0.0013	5.0173	5.2079	5.1759	5.3878	5.3726	5.7822	5.7368	5.6882	5.7168	5.487
pos_262	Dihydrocytochalasin B	metab_1789	yes	-	pos	-	464.283	7.79933	M+H-H2O, M+Na, M+H	C29H39NO5	0	61.1	HMDB0251302	-	-	-	-	-	Alkaloids and derivatives	Cytochalasans	Cytochalasins	0	61.1	-	-	1.4858	1.4729	4.814e-07	1.519e-05	6.0706	6.2208	6.216	6.2969	6.237	6.7521	6.7988	6.7857	6.7451	6.7775
pos_6335	Abacavir	metab_5879	yes	C07624	pos	136470-78-5	309.144	3.67295	M+Na	C14H18N6O	0	51.9	HMDB0015182;HMDB0251820;PW_C009479	-	-	-	-	-	Nucleosides, nucleotides, and analogues	Nucleoside and nucleotide analogues	Cyclopentyl nucleosides	0	51.9	-	-	2.1418	2.123	1.914e-06	3.49e-05	5.7293	5.2783	5.6256	5.3597	5.5185	4.3022	4.2588	4.1837	4.4636	4.4035
neg_2446	Ent-Abacavir	metab_9358	yes	-	neg	-	331.151	4.81148	M+FA-H	C14H18N6O	0	30.3	HMDB0251820	-	-	-	-	-	Nucleosides, nucleotides, and analogues	Nucleoside and nucleotide analogues	Cyclopentyl nucleosides	0	30.3	-	-	1.1221	1.1254	0.0002076	0.0004083	6.0447	5.6834	5.9338	5.7477	5.8245	5.3704	5.3819	5.3342	5.5039	5.3721
pos_2911	5-Deoxymyricanone	metab_2110	yes	-	pos	110007-10-8	363.155	4.70437	M+Na	C21H24O4	0	53.7	HMDB0030799	-	-	-	-	-	Phenylpropanoids and polyketides	Diarylheptanoids	Cyclic diarylheptanoids	0	53.7	-	-	2.0744	2.0576	1.873e-06	3.441e-05	4.0497	4.1868	4.3343	4.3576	4.3312	3.4219	3.0734	3.0671	3.1147	3.0775
pos_5099	Momordicoside L	metab_4513	yes	-	pos	81348-83-6	679.383	5.97178	M+2Na-H	C36H58O9	0	71.8	HMDB0035917	-	-	-	-	-	Lipids and lipid-like molecules	Steroids and steroid derivatives	Cucurbitacins	0	71.8	-	-	1.6922	1.6734	1.379e-05	8.369e-05	5.4723	5.5878	5.4447	5.5079	5.497	4.6334	4.5867	4.7587	5.0224	4.7793
neg_6549	Aesculin	metab_13897	yes	C09264	neg	531-75-9	321.065	3.69832	M-H2O-H	C15H16O9	0	35.8	HMDB0030820	-	-	-	-	-	Phenylpropanoids and polyketides	Coumarins and derivatives	Coumarin glycosides	0	35.8	-	-	1.535	1.5628	0.004642	0.006776	3.5027	4.5436	3.641	4.7299	4.4714	5.1418	5.2332	5.1684	5.0895	5.1688
neg_2308	Fumigaclavine A	metab_9207	yes	C20436	neg	6879-59-0	335.117	4.54393	M+K-2H	C18H22N2O2	0	39	HMDB0030202	-	-	map01110;map00901	Metabolism;Metabolism	Global and overview maps;Biosynthesis of other secondary metabolites	Alkaloids and derivatives	Ergoline and derivatives	Clavines and derivatives	0	39	Biosynthesis of secondary metabolites;Indole alkaloid biosynthesis	Biosynthesis of secondary metabolites;Indole alkaloid biosynthesis	1.1224	1.1209	1.571e-05	4.846e-05	4.5649	4.6818	4.7011	4.8015	4.8093	5.1644	5.1807	5.1179	5.1042	5.1622
pos_4398	3-beta-Hydroxy-4-beta-methyl-5-alpha-cholest-7-ene-4-alpha-carboxylate	metab_3742	yes	C04840	pos	-	427.357	6.8064	M+H-H2O	C29H48O3	0	51.1	HMDB0011662	-	-	-	-	-	Lipids and lipid-like molecules	Steroids and steroid derivatives	Cholestane steroids	0	51.1	-	-	1.164	1.147	0.004124	0.008409	6.013	5.5231	6.0075	5.8625	6.0749	5.4258	5.4932	5.5926	5.4524	5.4582
neg_3152	N-[(3a,5b,7b)-7-hydroxy-24-oxo-3-(sulfooxy)cholan-24-yl]-Glycine	metab_10139	yes	-	neg	133429-88-6	510.253	5.9627	M-H2O-H	C26H43NO8S	0	51.2	HMDB0002409	-	-	-	-	-	Lipids and lipid-like molecules	Steroids and steroid derivatives	Cholestane steroids	0	51.2	-	-	1.1506	1.1473	4.306e-07	2.887e-06	6.8647	6.9033	6.977	7.0129	7.0044	7.4029	7.3874	7.3753	7.4151	7.3995
neg_3448	5-alpha-Cholestane-3-beta,5,6-beta-triol, 6-acetate 3-(hydrogen succinate)	metab_10466	yes	-	neg	-	607.385	6.51547	M+FA-H	C33H54O7	0	41.5	HMDB0260315	-	-	-	-	-	Lipids and lipid-like molecules	Steroids and steroid derivatives	Cholestane steroids	0	41.5	-	-	1.3782	1.3702	7.037e-07	4.304e-06	6.4331	6.5948	6.5216	6.6026	6.6486	5.9893	5.9423	5.9276	5.9521	5.8369
pos_3662	Cer(d18:1/17:0)	metab_2933	yes	-	pos	67492-16-4	584.561	6.83022	M+CH3OH+H	C35H69NO3	0	54.1	HMDB0240678;LMSP02010020	-	-	-	-	-	Lipids and lipid-like molecules	Sphingolipids	Ceramides	0	54.1	-	-	1.1221	1.1177	0.01776	0.02938	6.0514	5.8727	5.6702	5.5946	5.6268	5.5618	4.9065	5.4351	5.2143	5.4999
neg_3210	CDP-DG(18:2(9Z,12Z)/18:1(9Z))	metab_10204	yes	C00269	neg	-	984.518	6.06387	M-H2O-H	C48H83N3O15P2	0	43.4	HMDB0115968;PW_C063111	-	-	map01100;map00564;map01110;map04070	Metabolism;Metabolism;Metabolism;Environmental Information Processing	Global and overview maps;Lipid metabolism;Global and overview maps;Signal transduction	Lipids and lipid-like molecules	Glycerophospholipids	CDP-glycerols	0	43.4	Metabolic pathways;Glycerophospholipid metabolism;Biosynthesis of secondary metabolites;Phosphatidylinositol signaling system	Metabolic pathways;Glycerophospholipid metabolism;Biosynthesis of secondary metabolites;Phosphatidylinositol signaling system	1.565	1.565	0.03965	0.05019	4.7884	3.3925	5.3713	4.957	5.2479	3.1317	3.1468	4.9432	3.2118	3.1415
neg_4686	CDP-DG(16:0/18:1(9Z))	metab_11835	yes	C00269	neg	-	1000.51	6.07168	M+Na-2H	C46H83N3O15P2	0	36.6	PW_C003022;HMDB0006971;LMGP13010006	-	-	map01100;map00564;map01110;map04070	Metabolism;Metabolism;Metabolism;Environmental Information Processing	Global and overview maps;Lipid metabolism;Global and overview maps;Signal transduction	Lipids and lipid-like molecules	Glycerophospholipids	CDP-glycerols	0	36.6	Metabolic pathways;Glycerophospholipid metabolism;Biosynthesis of secondary metabolites;Phosphatidylinositol signaling system	Metabolic pathways;Glycerophospholipid metabolism;Biosynthesis of secondary metabolites;Phosphatidylinositol signaling system	1.9397	1.9321	1.588e-05	4.887e-05	6.1974	6.223	6.2205	6.0918	6.3408	5.1988	4.6888	5.3039	4.7539	4.6835
neg_3145	3-Cyclopentylpropionic acid	metab_10131	yes	-	neg	-	343.212	5.9627	2M+Hac-H	C8H14O2	0	37	HMDB0245846	-	-	-	-	-	Organic acids and derivatives	Carboxylic acids and derivatives	Carboxylic acids	0	37	-	-	2.097	2.0879	2.549e-07	1.907e-06	5.0226	4.9288	4.8991	4.9733	4.8809	3.2575	3.2726	3.6759	3.5356	3.6365
pos_221	Dihydroceramide	metab_1338	yes	C12126	pos	2304-80-5	330.3	6.45648	M+H-H2O, M+H, M+H-2H2O	C19H39NO3	0	50.1	HMDB0006752;PW_C002905;HMDB0011761	-	-	map00600;map01100;map04071	Metabolism;Metabolism;Environmental Information Processing	Lipid metabolism;Global and overview maps;Signal transduction	Organic acids and derivatives	Carboxylic acids and derivatives	Carboxylic acid derivatives	0	50.1	Sphingolipid metabolism;Metabolic pathways;Sphingolipid signaling pathway	Sphingolipid metabolism;Metabolic pathways;Sphingolipid signaling pathway	1.9239	1.8923	0.0003387	0.001033	5.6579	5.4152	5.4403	5.7691	4.8728	6.2295	6.3218	6.5148	6.5571	6.5581
pos_3025	Deferoxamine	metab_2237	yes	C06940	pos	70-51-9	543.35	5.04975	M+H-H2O	C25H48N6O8	0	41.9	LMFA08020169;HMDB0014884;MJDBOTE0001596	-	-	-	-	-	Organic acids and derivatives	Carboxylic acids and derivatives	Carboxylic acid derivatives	0	41.9	-	-	1.1097	1.1029	0.0004926	0.001391	4.5458	4.5339	4.6998	4.7872	4.7277	5.0838	4.912	4.9375	5.0193	5.075
neg_6456	2-Hydroxypropyl methacrylamide	metab_13795	yes	-	neg	-	188.092	3.8165	M+FA-H	C7H13NO2	0	42.7	HMDB0245163;HMDB0254991	-	-	-	-	-	Organic acids and derivatives	Carboxylic acids and derivatives	Carboxylic acid derivatives	0	42.7	-	-	1.169	1.1885	0.004027	0.00592	3.2505	3.758	3.5928	4.0143	3.9086	4.2827	4.346	4.1556	4.1827	4.3422
neg_6689	N-Acetyl-1,6-diaminohexane	metab_14052	yes	-	neg	-	157.134	3.56445	M-H	C8H18N2O	0	38.4	HMDB0255016	-	-	-	-	-	Organic acids and derivatives	Carboxylic acids and derivatives	Carboxylic acid derivatives	0	38.4	-	-	1.0934	1.0975	0.0005277	0.0009373	5.1795	4.9883	4.9882	4.8387	4.8602	4.4543	4.4647	4.6032	4.6961	4.4477
pos_7516	N8-Acetylspermidine	metab_7177	yes	C01029	pos	13431-24-8	188.176	0.875	M+H	C9H21N3O	73.2	0	HMDB0002189	-	-	-	-	-	Organic acids and derivatives	Carboximidic acids and derivatives	Carboximidic acids	73.2	0	-	-	1.234	1.2214	0.006285	0.01193	4.2252	3.6753	3.6014	4.0981	3.9412	3.3707	3.3607	3.3543	3.6207	3.4514
pos_3075	Kanokoside C	metab_2292	yes	C17430	pos	64703-87-3	671.274	5.19377	M+CH3OH+H	C27H42O17	0	47	HMDB0035305	-	-	-	-	-	Organic oxygen compounds	Organooxygen compounds	Carbonyl compounds	0	47	-	-	1.3231	1.3477	0.02773	0.04305	4.4253	3.1524	3.9929	3.842	3.1783	3.0598	3.0498	3.0434	3.0911	3.0538
pos_3567	KOBUSONE	metab_2830	yes	C16983	pos	24173-71-5	223.169	6.52018	M+H	C14H22O2	49	0	HMDB0036790	-	-	-	-	-	Organic oxygen compounds	Organooxygen compounds	Carbonyl compounds	49	0	-	-	1.0078	0.9974	0.0003804	0.001133	5.6349	5.6	5.6256	5.6479	5.6351	5.4115	5.3218	5.279	5.498	5.2374
pos_4512	3-ketosphingosine	metab_3870	yes	C06121	pos	-	298.274	6.60768	M+H	C18H35NO2	63.2	0	HMDB0245914;LMSP01010002	-	-	-	-	-	Organic oxygen compounds	Organooxygen compounds	Carbonyl compounds	63.2	0	-	-	1.0697	1.0538	0.004999	0.009893	5.7376	5.6239	5.6877	5.7972	5.8481	5.6095	5.2429	5.3415	5.557	5.2097
pos_499	Acetophenone, 4'-hydroxy-3'-methoxy-2-(2-piperidyl)-	metab_4394	yes	-	pos	-	267.17	3.1052	M+H, M+NH4	C14H19NO3	0	36.1	HMDB0247917	-	-	-	-	-	Organic oxygen compounds	Organooxygen compounds	Carbonyl compounds	0	36.1	-	-	1.3868	1.3749	0.002884	0.006142	3.8059	3.9723	3.807	4.0505	3.9494	3.507	3.2393	3.7391	3.2399	3.0073
pos_5549	Xanthoxylin	metab_5008	yes	C10726	pos	90-24-4	238.107	5.15375	M+ACN+H	C10H12O4	0	38.6	HMDB0029645	-	-	-	-	-	Organic oxygen compounds	Organooxygen compounds	Carbonyl compounds	0	38.6	-	-	1.0693	1.063	7.892e-05	0.0003273	5.8895	5.668	5.8358	5.7629	5.7692	5.4872	5.4551	5.4164	5.4982	5.5265
pos_6472	4-(2-Amino-3-hydroxyphenyl)-2,4-dioxobutanoic acid	metab_6031	yes	C05645	pos	857760-67-9	206.045	3.48008	M+H-H2O	C10H9NO5	0	49	HMDB0004083;PW_C002053	-	-	map00380	Metabolism	Amino acid metabolism	Organic oxygen compounds	Organooxygen compounds	Carbonyl compounds	0	49	Tryptophan metabolism	Tryptophan metabolism	1.1173	1.113	1.742e-05	0.0001004	4.9088	4.9816	4.9481	5.0275	5.0814	5.3669	5.3732	5.2972	5.2803	5.2842
pos_6731	Formyl-5-hydroxykynurenamine	metab_6315	yes	C05647	pos	958733-17-0	209.092	3.1052	M+H	C10H12N2O3	0	44.1	PW_C008135;HMDB0012948	-	-	map00380	Metabolism	Amino acid metabolism	Organic oxygen compounds	Organooxygen compounds	Carbonyl compounds	0	44.1	Tryptophan metabolism	Tryptophan metabolism	1.3917	1.389	0.0001361	0.0004989	3.1896	3.188	3.1949	3.4245	3.3877	4.023	3.789	3.7877	3.7621	3.6802
pos_6841	5-Methyl-2-furaldehyde	metab_6437	yes	C11115	pos	620-02-0	111.044	2.96135	M+H	C6H6O2	45.2	0	HMDB0033002	-	-	-	-	-	Organic oxygen compounds	Organooxygen compounds	Carbonyl compounds	45.2	0	-	-	1.0849	1.077	3.655e-05	0.0001783	5.0407	5.1444	5.1445	5.2487	5.1874	5.4996	5.5074	5.412	5.4506	5.4604
pos_732	Inproquone	metab_6963	yes	-	pos	-	307.165	4.96173	M+H, M+Na	C16H22N2O4	0	32.3	HMDB0253499	-	-	-	-	-	Organic oxygen compounds	Organooxygen compounds	Carbonyl compounds	0	32.3	-	-	1.1621	1.1844	0.001039	0.002586	4.5097	4.4931	4.6066	4.5856	4.6765	4.211	4.2069	4.3191	3.9204	4.2758
neg_1878	DHAP(18:0)	metab_8730	yes	C03805	neg	-	457.23	3.8954	M+Na-2H	C21H41O7P	0	36.4	HMDB0011133;PW_C006772	-	-	-	-	-	Organic oxygen compounds	Organooxygen compounds	Carbonyl compounds	0	36.4	-	-	1.1432	1.1412	1.798e-05	5.408e-05	6.127	5.9936	6.0437	5.8789	5.9453	5.4854	5.5012	5.6148	5.6039	5.5316
neg_2049	6-Hydroxypseudooxynicotine	metab_8920	yes	C01297	neg	7424-35-3	447.228	4.11602	2M+Hac-H	C10H14N2O2	0	49.7	HMDB0240264	-	-	map01100;map01120;map00760	Metabolism;Metabolism;Metabolism	Global and overview maps;Global and overview maps;Metabolism of cofactors and vitamins	Organic oxygen compounds	Organooxygen compounds	Carbonyl compounds	0	49.7	Metabolic pathways;Microbial metabolism in diverse environments;Nicotinate and nicotinamide metabolism	Metabolic pathways;Microbial metabolism in diverse environments;Nicotinate and nicotinamide metabolism	1.5522	1.5419	1.279e-05	4.128e-05	5.1232	5.3363	5.1666	5.385	5.3832	4.6846	4.3123	4.3827	4.5307	4.4015
neg_2411	DHAP(10:0)	metab_9320	yes	-	neg	-	323.128	4.74325	M-H	C13H25O7P	0	44.6	HMDB0011675	-	-	-	-	-	Organic oxygen compounds	Organooxygen compounds	Carbonyl compounds	0	44.6	-	-	1.2844	1.2785	0.0002208	0.0004323	5.093	5.3626	5.1544	5.4298	5.1523	4.7218	4.807	4.505	4.7326	4.4893
neg_2429	N4-Acetylaminobutanal	metab_9339	yes	C05936	neg	-	303.156	4.78017	2M+FA-H	C6H11NO2	0	33.1	HMDB0004226	-	-	map01100;map00330	Metabolism;Metabolism	Global and overview maps;Amino acid metabolism	Organic oxygen compounds	Organooxygen compounds	Carbonyl compounds	0	33.1	Metabolic pathways;Arginine and proline metabolism	Metabolic pathways;Arginine and proline metabolism	1.1305	1.1325	8.056e-05	0.0001841	5.8093	5.4997	5.729	5.6004	5.5968	5.1523	5.1426	5.1613	5.2962	5.2196
neg_2454	Kynuramine	metab_9367	yes	-	neg	363-36-0	373.188	4.8257	2M+FA-H	C9H12N2O	0	33.1	HMDB0012246	-	-	-	-	-	Organic oxygen compounds	Organooxygen compounds	Carbonyl compounds	0	33.1	-	-	1.5714	1.5674	5.49e-05	0.0001333	4.9788	4.9496	4.8642	4.6388	4.6543	3.9253	3.6356	4.1196	4.0172	4.0616
neg_3297	Embelin	metab_10298	yes	C10342	neg	550-24-3	293.176	6.25042	M-H	C17H26O4	0	42.6	HMDB0251767;LMPK15050006	-	-	-	-	-	Organic oxygen compounds	Organooxygen compounds	Carbonyl compounds	0	42.6	-	-	1.3515	1.3508	1.254e-05	4.072e-05	4.9651	4.7638	4.914	4.6776	4.7112	4.119	4.1341	4.3026	4.1992	4.1288
neg_4814	3-Hydroxykynurenamine	metab_11978	yes	C05636	neg	-	359.171	5.95487	2M-H	C9H12N2O2	0	31.8	HMDB0060281	-	-	map00380	Metabolism	Amino acid metabolism	Organic oxygen compounds	Organooxygen compounds	Carbonyl compounds	0	31.8	Tryptophan metabolism	Tryptophan metabolism	2.4916	2.4723	1.642e-06	8.365e-06	5.2316	5.1198	5.0943	5.2013	5.1863	2.8075	3.4885	2.8415	3.502	2.8173
pos_1222	Docosahexaenoylethanolamine	metab_248	yes	-	pos	-	354.278	6.28167	M+H-H2O, M+H	C24H37NO2	0	59.1	HMDB0251559	-	-	-	-	-	Organic oxygen compounds	Organooxygen compounds	Carbohydrates and carbohydrate conjugates	0	59.1	-	-	2.0474	2.0312	1.122e-08	1.416e-06	6.0492	6.0275	6.1011	6.1029	6.1905	4.9488	5.1623	5.0157	5.0497	5.0264
pos_1619	2-O-a-D-Galactopyranuronosyl-L-rhamnose	metab_688	yes	-	pos	6118-79-2	363.089	0.945833	M+Na, M+K	C12H20O11	0	66.3	HMDB0040159	-	-	-	-	-	Organic oxygen compounds	Organooxygen compounds	Carbohydrates and carbohydrate conjugates	0	66.3	-	-	1.9319	1.9138	2.578e-09	5.461e-07	4.021	4.0171	4.0263	4.1436	4.0431	4.9897	5.048	5.0013	4.9058	4.9942
pos_2226	Aceneuramic acid	metab_1356	yes	C19910	pos	19342-33-7	274.092	3.01718	M+H-2H2O	C11H19NO9	0	34.4	HMDB0000230;HMDB0259583	-	-	-	-	-	Organic oxygen compounds	Organooxygen compounds	Carbohydrates and carbohydrate conjugates	0	34.4	-	-	1.9365	1.9236	0.0001439	0.0005203	3.9094	4.7169	4.4544	4.7479	4.5008	5.5179	5.5015	5.4548	5.4808	5.476
pos_2772	Micronomicin	metab_1957	yes	-	pos	-	527.319	4.29402	M+ACN+Na	C20H41N5O7	0	70.2	HMDB0254707	-	-	-	-	-	Organic oxygen compounds	Organooxygen compounds	Carbohydrates and carbohydrate conjugates	0	70.2	-	-	1.2912	1.2809	0.0001027	0.0003984	5.508	5.3786	5.5113	5.4037	5.4729	4.9442	4.9654	4.9473	5.2349	4.9483
pos_2915	Phenethylamine glucuronide	metab_2114	yes	C03033	pos	-	361.139	4.72037	M+ACN+Na	C14H19NO6	0	66.3	HMDB0010323	-	-	map01100;map00040;map04976;map00053;map01240	Metabolism;Metabolism;Organismal Systems;Metabolism;Metabolism	Global and overview maps;Carbohydrate metabolism;Digestive system;Carbohydrate metabolism;Global and overview maps	Organic oxygen compounds	Organooxygen compounds	Carbohydrates and carbohydrate conjugates	0	66.3	Metabolic pathways;Pentose and glucuronate interconversions;Bile secretion;Ascorbate and aldarate metabolism;Biosynthesis of cofactors	Metabolic pathways;Pentose and glucuronate interconversions;Bile secretion;Ascorbate and aldarate metabolism;Biosynthesis of cofactors	1.3389	1.3279	0.0001498	0.0005356	4.0736	4.098	4.1147	4.4111	4.2131	4.5473	4.7855	4.6632	4.6716	4.6814
pos_3213	Gemfibrozil 1-O-beta-Glucuronide	metab_2445	yes	-	pos	-	459.223	5.63553	M+CH3OH+H	C21H30O9	0	33.2	HMDB0247652	-	-	-	-	-	Organic oxygen compounds	Organooxygen compounds	Carbohydrates and carbohydrate conjugates	0	33.2	-	-	1.396	1.4168	0.03515	0.05254	2.9418	1.7362	2.6931	1.7199	1.7171	2.6318	2.9636	2.9205	2.821	2.9968
pos_3305	Vomifoliol 9-[glucosyl-(1->4)-xylosyl-(1->6)-glucoside]	metab_2545	yes	-	pos	141947-49-1	698.322	5.8918	M+NH4	C30H48O17	0	69	HMDB0038449	-	-	-	-	-	Organic oxygen compounds	Organooxygen compounds	Carbohydrates and carbohydrate conjugates	0	69	-	-	1.3057	1.2991	6.07e-06	4.396e-05	5.4734	5.2949	5.3799	5.3911	5.2592	5.8573	5.7549	5.7682	5.8142	5.7961
pos_5946	Muramic acid	metab_5446	yes	C06470	pos	1114-41-6	274.092	4.34202	M+Na	C9H17NO7	0	67	HMDB0003254;HMDB0248237	Carbohydrates	Monosaccharides	-	-	-	Organic oxygen compounds	Organooxygen compounds	Carbohydrates and carbohydrate conjugates	0	67	-	-	1.7796	1.7609	0.0003865	0.001147	3.4593	4.2051	4.1441	4.2307	3.836	4.9624	4.8551	4.7904	4.8169	4.8308
pos_5951	Sorbitol-6-phosphate	metab_5452	yes	C02810	pos	20479-58-7	295.078	4.33402	M+CH3OH+H	C6H15O9P	0	37.6	HMDB0005831	-	-	-	-	-	Organic oxygen compounds	Organooxygen compounds	Carbohydrates and carbohydrate conjugates	0	37.6	-	-	1.5298	1.5188	4.746e-06	4.363e-05	4.6848	4.9514	4.8284	4.9598	4.9375	5.5278	5.5268	5.4424	5.434	5.4712
pos_6009	Aspartylglycosamine	metab_5517	yes	C04540	pos	2776-93-4	336.137	4.22132	M+H	C12H21N3O8	0	67.3	HMDB0000489	-	-	-	-	-	Organic oxygen compounds	Organooxygen compounds	Carbohydrates and carbohydrate conjugates	0	67.3	-	-	1.0283	1.0227	4.557e-05	0.00021	5.3911	5.353	5.3004	5.2242	5.2664	5.0463	5.025	5.0805	4.9649	5.0068
pos_6056	N-Acetyl-a-neuraminic acid	metab_5569	yes	C19909	pos	21646-00-4	274.092	4.12465	M+H-2H2O	C11H19NO9	0	63.5	HMDB0000773	-	-	-	-	-	Organic oxygen compounds	Organooxygen compounds	Carbohydrates and carbohydrate conjugates	0	63.5	-	-	2.0572	2.0256	0.0001419	0.0005142	3.4247	4.128	3.8929	4.1341	3.3729	4.9167	4.9701	4.8491	4.919	4.963
pos_6101	1-[(5-Amino-5-carboxypentyl)amino]-1-deoxyfructose	metab_5620	yes	-	pos	21291-40-7	347.124	4.04395	M+K	C12H24N2O7	0	49.8	HMDB0034879	-	-	-	-	-	Organic oxygen compounds	Organooxygen compounds	Carbohydrates and carbohydrate conjugates	0	49.8	-	-	1.0854	1.1017	0.01738	0.02891	3.3875	3.9824	4.0084	4.0321	4.1333	4.3361	4.3767	4.2193	4.2548	4.4152
pos_6226	Apramycin	metab_5758	yes	C01555	pos	37321-09-8	504.266	3.8506	M+H-2H2O	C21H41N5O11	0	60.4	HMDB0248529	-	-	map00524	Metabolism	Biosynthesis of other secondary metabolites	Organic oxygen compounds	Organooxygen compounds	Carbohydrates and carbohydrate conjugates	0	60.4	Neomycin, kanamycin and gentamicin biosynthesis	Neomycin, kanamycin and gentamicin biosynthesis	1.101	1.1157	0.003594	0.007461	5.5059	5.1189	5.4428	5.2626	5.3223	4.9427	4.8882	4.8612	5.1946	4.9202
pos_6329	Astromicin	metab_5872	yes	C17708	pos	55779-06-1	428.25	3.68145	M+Na	C17H35N5O6	0	70.1	HMDB0248678	-	-	-	-	-	Organic oxygen compounds	Organooxygen compounds	Carbohydrates and carbohydrate conjugates	0	70.1	-	-	1.1402	1.1352	2.969e-05	0.0001527	5.8806	5.7473	5.8252	5.7168	5.7134	5.4195	5.3934	5.3811	5.5189	5.4429
pos_6480	Gentamicin B	metab_6040	yes	-	pos	-	546.277	3.45608	M+ACN+Na	C19H38N4O10	0	41.7	HMDB0252687	-	-	-	-	-	Organic oxygen compounds	Organooxygen compounds	Carbohydrates and carbohydrate conjugates	0	41.7	-	-	1.8449	1.8293	6.498e-06	4.649e-05	5.6686	5.6662	5.499	5.4817	5.4522	4.6349	4.5117	4.5581	4.9137	4.7264
pos_6708	Tuliposide A	metab_6290	yes	C08561	pos	19870-30-5	296.135	3.13712	M+NH4	C11H18O8	0	72	LMFA13010041;HMDB0303140	-	-	-	-	-	Organic oxygen compounds	Organooxygen compounds	Carbohydrates and carbohydrate conjugates	0	72	-	-	1.7353	1.7117	0.000386	0.001146	4.0601	4.092	4.0142	4.1411	3.7271	4.5642	4.7531	5.2915	4.8289	4.7442
pos_6908	Validamycin A	metab_6510	yes	C12112	pos	37248-47-8	515.246	2.87382	M+NH4	C20H35NO13	0	67.9	HMDB0036592	-	-	map01100;map01110;map00525	Metabolism;Metabolism;Metabolism	Global and overview maps;Global and overview maps;Biosynthesis of other secondary metabolites	Organic oxygen compounds	Organooxygen compounds	Carbohydrates and carbohydrate conjugates	0	67.9	Metabolic pathways;Biosynthesis of secondary metabolites;Acarbose and validamycin biosynthesis	Metabolic pathways;Biosynthesis of secondary metabolites;Acarbose and validamycin biosynthesis	1.0799	1.0749	0.0001952	0.0006598	7.2446	7.2356	7.1448	7.0269	7.0659	6.8397	6.7869	6.7646	6.8999	6.8229
pos_6927	Methyl salicylate O-[rhamnosyl-(1->6)-glucoside]	metab_6531	yes	-	pos	-	478.196	2.85002	M+NH4	C20H28O12	0	63.2	HMDB0033138	-	-	-	-	-	Organic oxygen compounds	Organooxygen compounds	Carbohydrates and carbohydrate conjugates	0	63.2	-	-	1.4248	1.4011	0.0008489	0.00218	5.5954	5.5381	5.5087	5.4233	5.6139	5.22	5.0127	5.0711	4.9329	4.5901
pos_6933	N-Acetylmuramate	metab_6538	yes	C02713	pos	61633-75-8	276.108	2.82723	M+H-H2O	C11H19NO8	75.9	0	HMDB0060493	Carbohydrates	Monosaccharides	map01100;map00520;map02060	Metabolism;Metabolism;Environmental Information Processing	Global and overview maps;Carbohydrate metabolism;Membrane transport	Organic oxygen compounds	Organooxygen compounds	Carbohydrates and carbohydrate conjugates	75.9	0	Metabolic pathways;Amino sugar and nucleotide sugar metabolism;Phosphotransferase system (PTS)	Metabolic pathways;Amino sugar and nucleotide sugar metabolism;Phosphotransferase system (PTS)	1.2997	1.3139	0.02051	0.03329	3.0873	3.3681	3.5502	3.3567	2.5658	3.0747	2.4376	2.4313	2.4788	2.4416
pos_7181	Ribonolactone	metab_6814	yes	C02674	pos	5336-08-03	190.071	2.54032	M+ACN+H	C5H8O5	0	46.7	HMDB0001900	-	-	-	-	-	Organic oxygen compounds	Organooxygen compounds	Carbohydrates and carbohydrate conjugates	0	46.7	-	-	1.3055	1.3047	5.016e-05	0.0002285	3.4601	3.6922	3.7004	3.8064	3.6983	3.2201	3.2101	3.2037	3.2514	3.2141
pos_7463	Arabinogalactose	metab_7119	yes	C07285	pos	-	277.089	0.945833	M+H-2H2O	C11H20O10	0	52.9	HMDB0302563	-	-	-	-	-	Organic oxygen compounds	Organooxygen compounds	Carbohydrates and carbohydrate conjugates	0	52.9	-	-	1.0963	1.0884	8.644e-05	0.0003514	6.9562	7.0125	6.8459	6.8063	6.8064	6.6044	6.5415	6.5645	6.5793	6.5171
pos_75	N-Acetyl-D-mannosamine	metab_7158	yes	C00645	pos	7772-94-3;3615-17-6	204.087	1.08767	M+H-2H2O, M+H, M+H-H2O	C8H15NO6	67.4	0	HMDB0001129	Carbohydrates	Monosaccharides	map01100;map00520;map00541	Metabolism;Metabolism;Metabolism	Global and overview maps;Carbohydrate metabolism;Glycan biosynthesis and metabolism	Organic oxygen compounds	Organooxygen compounds	Carbohydrates and carbohydrate conjugates	67.4	0	Metabolic pathways;Amino sugar and nucleotide sugar metabolism;O-Antigen nucleotide sugar biosynthesis	Metabolic pathways;Amino sugar and nucleotide sugar metabolism;O-Antigen nucleotide sugar biosynthesis	1.1987	1.1869	2.792e-07	1.111e-05	6.4093	6.4564	6.467	6.4602	6.5366	6.1364	6.1202	6.094	6.0911	6.075
pos_7569	Beta-D-Glucosamine	metab_7235	yes	C08349	pos	14257-69-3	202.069	0.80395	M+Na	C6H13NO5	0	31.8	HMDB0030091	-	-	-	-	-	Organic oxygen compounds	Organooxygen compounds	Carbohydrates and carbohydrate conjugates	0	31.8	-	-	1.1474	1.1454	0.001183	0.002868	4.9227	4.7575	4.9204	4.8587	4.876	4.2072	4.558	4.5234	4.5036	4.6256
pos_777	Chitobiose	metab_7449	yes	C01674	pos	35061-50-8;577-76-4	444.186	5.43447	M+NH4, M+Na	C15H26N2O12	0	66.5	PW_C001925;HMDB0062702;HMDB0003556	-	-	map01100;map00520;map02060;map02010	Metabolism;Metabolism;Environmental Information Processing;Environmental Information Processing	Global and overview maps;Carbohydrate metabolism;Membrane transport;Membrane transport	Organic oxygen compounds	Organooxygen compounds	Carbohydrates and carbohydrate conjugates	0	66.5	Metabolic pathways;Amino sugar and nucleotide sugar metabolism;Phosphotransferase system (PTS);ABC transporters	Metabolic pathways;Amino sugar and nucleotide sugar metabolism;Phosphotransferase system (PTS);ABC transporters	1.0212	1.0162	0.0001032	0.0003997	5.3316	5.4986	5.3841	5.5149	5.4899	5.7686	5.7592	5.6786	5.7055	5.723
pos_797	Niazirin	metab_7471	yes	-	pos	122001-32-5	321.144	5.67548	M+Na, M+ACN+H	C14H17NO5	0	30.4	HMDB0032807	-	-	-	-	-	Organic oxygen compounds	Organooxygen compounds	Carbohydrates and carbohydrate conjugates	0	30.4	-	-	1.3442	1.3316	0.0001805	0.0006178	4.5171	4.8027	4.5683	4.8833	4.6001	5.2032	5.2343	5.1045	5.1294	5.1563
pos_6514	Kanamycin	metab_7731	yes	C01822	pos	59-01-8;8063-07-8	548.256	3.40807	M+ACN+Na	C18H36N4O11	0	55.4	HMDB0015303;PW_C009586	-	-	map01110;map00524	Metabolism;Metabolism	Global and overview maps;Biosynthesis of other secondary metabolites	Organic oxygen compounds	Organooxygen compounds	Carbohydrates and carbohydrate conjugates	0	55.4	Biosynthesis of secondary metabolites;Neomycin, kanamycin and gentamicin biosynthesis	Biosynthesis of secondary metabolites;Neomycin, kanamycin and gentamicin biosynthesis	1.6174	1.6036	2.286e-05	0.0001244	5.7721	5.6936	5.4889	5.4088	5.4907	4.9453	4.8029	4.8114	4.9962	4.8545
pos_7453	N-Acetylneuraminic acid	metab_7742	yes	C00270	pos	19342-33-7;21646-00-4;131-48-6	332.095	0.953583	M+Na	C11H19NO9	0	76.7	HMDB0000230;PW_C000155;HMDB0000773;HMDB0246275	Carbohydrates	Monosaccharides	map01100;map00520;map00541	Metabolism;Metabolism;Metabolism	Global and overview maps;Carbohydrate metabolism;Glycan biosynthesis and metabolism	Organic oxygen compounds	Organooxygen compounds	Carbohydrates and carbohydrate conjugates	0	76.7	Metabolic pathways;Amino sugar and nucleotide sugar metabolism;O-Antigen nucleotide sugar biosynthesis	Metabolic pathways;Amino sugar and nucleotide sugar metabolism;O-Antigen nucleotide sugar biosynthesis	1.94	1.9327	2.333e-07	9.883e-06	6.2929	6.4508	6.3509	6.4363	6.4578	5.6001	5.474	5.3818	5.3001	5.4601
neg_1049	N-Acetylglucosamine 6-sulfate	metab_7812	yes	C04132	neg	10356-99-7	300.039	0.9539	M-H	C8H15NO9S	0	57.5	HMDB0000814	-	-	-	-	-	Organic oxygen compounds	Organooxygen compounds	Carbohydrates and carbohydrate conjugates	0	57.5	-	-	2.0158	2.0135	1.253e-08	7.186e-07	6.3244	6.3438	6.3144	6.3005	6.3782	5.1176	5.1301	4.8998	4.8743	4.9118
neg_1103	3h-Sialic acid	metab_7873	yes	-	neg	-	290.088	1.22812	M-H2O-H	C11H19NO9	0	42.5	HMDB0246275	-	-	-	-	-	Organic oxygen compounds	Organooxygen compounds	Carbohydrates and carbohydrate conjugates	0	42.5	-	-	1.6637	1.6867	0.0002144	0.0004212	5.9118	6.194	5.9975	6.1332	6.0765	5.0026	5.2775	5.4375	4.5603	5.0279
neg_1106	D-Ribulose	metab_7876	yes	C00309	neg	131064-70-5;488-84-6	449.152	1.23593	3M-H	C5H10O5	0	38.8	HMDB0000621	Carbohydrates	Monosaccharides	map01100;map00040	Metabolism;Metabolism	Global and overview maps;Carbohydrate metabolism	Organic oxygen compounds	Organooxygen compounds	Carbohydrates and carbohydrate conjugates	0	38.8	Metabolic pathways;Pentose and glucuronate interconversions	Metabolic pathways;Pentose and glucuronate interconversions	1.2343	1.2264	3.702e-06	1.561e-05	6.5116	6.4743	6.4715	6.4257	6.3908	5.9021	5.9301	5.8997	6.1018	5.8767
neg_1183	Ethyl Glucuronide	metab_7960	yes	-	neg	17685-04-0	221.066	1.8316	M-H	C8H14O7	51.2	0	HMDB0010325	-	-	-	-	-	Organic oxygen compounds	Organooxygen compounds	Carbohydrates and carbohydrate conjugates	51.2	0	-	-	1.0836	1.0791	0.0003091	0.0005804	5.153	5.0983	5.1272	5.0234	5.0585	4.6394	4.6746	4.459	4.8732	4.6968
neg_1299	N-Acetyllactosamine	metab_8088	yes	C00611	neg	32181-59-2	364.125	3.20182	M-H2O-H	C14H25NO11	0	54	HMDB0001542	-	-	-	-	-	Organic oxygen compounds	Organooxygen compounds	Carbohydrates and carbohydrate conjugates	0	54	-	-	1.284	1.2747	4.849e-06	1.934e-05	5.0399	5.1229	4.9863	5.07	4.9546	4.3372	4.494	4.5776	4.5425	4.4423
neg_1331	Aminodeoxykanamycin	metab_8125	yes	C01822	neg	8063-07-08	504.231	3.24093	M+Na-2H	C18H37N5O10	0	86	HMDB0242522;HMDB0015303	-	-	map01110;map00524	Metabolism;Metabolism	Global and overview maps;Biosynthesis of other secondary metabolites	Organic oxygen compounds	Organooxygen compounds	Carbohydrates and carbohydrate conjugates	0	86	Biosynthesis of secondary metabolites;Neomycin, kanamycin and gentamicin biosynthesis	Biosynthesis of secondary metabolites;Neomycin, kanamycin and gentamicin biosynthesis	1.5303	1.52	9.439e-06	3.235e-05	5.9726	5.8186	5.9368	5.8903	5.948	4.9226	5.1867	4.9861	5.3511	5.1442
neg_1551	8-methylthiooctyldesulfoglucosinolate	metab_8368	yes	-	neg	-	378.141	3.48562	M-H2O-H	C16H31NO6S2	0	33.7	HMDB0304249	-	-	-	-	-	Organic oxygen compounds	Organooxygen compounds	Carbohydrates and carbohydrate conjugates	0	33.7	-	-	2.0971	2.0918	4.907e-07	3.255e-06	5.5287	5.7531	5.5536	5.8112	5.8272	4.3897	4.011	4.4078	4.1041	4.2373
neg_2470	Dibekacin	metab_9385	yes	-	neg	-	472.241	4.86442	M+Na-2H	C18H37N5O8	0	90.4	HMDB0251157	-	-	-	-	-	Organic oxygen compounds	Organooxygen compounds	Carbohydrates and carbohydrate conjugates	0	90.4	-	-	1.2833	1.2754	8.207e-05	0.0001867	5.4694	5.4167	5.3391	5.2535	5.2971	4.6847	4.6273	4.8874	4.9905	4.7226
neg_2626	Diethylaminoethyl-Sephacel	metab_9558	yes	-	neg	-	415.22	5.13875	M+K-2H	C18H38N2O6	0	46	HMDB0251243	-	-	-	-	-	Organic oxygen compounds	Organooxygen compounds	Carbohydrates and carbohydrate conjugates	0	46	-	-	1.0178	1.018	4.066e-05	0.0001038	5.6868	5.5723	5.6912	5.5572	5.5326	5.1838	5.2606	5.1981	5.351	5.2366
neg_2664	3-Hydroxychavicol 1-[rhamnosyl-(1->6)-glucoside]	metab_9600	yes	-	neg	267668-14-4	493.147	5.19903	M+Cl	C21H30O11	0	36	HMDB0037108	-	-	-	-	-	Organic oxygen compounds	Organooxygen compounds	Carbohydrates and carbohydrate conjugates	0	36	-	-	1.0837	1.086	0.001162	0.001892	4.9808	5.3506	5.1247	5.462	5.1058	5.7078	5.6687	5.5639	5.6741	5.6473
neg_2825	2-Phenylethyl beta-D-glucopyranoside	metab_9778	yes	-	neg	18997-54-1	329.124	5.46432	M+FA-H	C14H20O6	0	34.4	HMDB0029819	-	-	-	-	-	Organic oxygen compounds	Organooxygen compounds	Carbohydrates and carbohydrate conjugates	0	34.4	-	-	2.8422	2.8317	8.221e-09	5.473e-07	4.1407	4.0653	3.9756	4.0447	4.1774	1.7456	1.2364	1.5651	1.298	1.2314
neg_45	Fructose lactate	metab_11629	yes	-	neg	-	267.073	3.26505	M-H, M+Cl, M+FA-H	C9H16O9	0	30.5	HMDB0252491	-	-	-	-	-	Organic oxygen compounds	Organooxygen compounds	Carbohydrates and carbohydrate conjugates	0	30.5	-	-	1.1069	1.097	0.0001997	0.0003955	6.7511	6.6403	6.6773	6.6859	6.855	6.1636	6.2725	6.4979	6.2558	6.2452
neg_4790	Alpha-CEHC glucuronide	metab_11951	yes	-	neg	477200-36-5	453.177	5.9627	M-H	C22H30O10	0	47.7	HMDB0062445	-	-	-	-	-	Organic oxygen compounds	Organooxygen compounds	Carbohydrates and carbohydrate conjugates	0	47.7	-	-	2.6652	2.6532	2.666e-11	8.956e-09	5.952	6.0819	5.815	5.9056	5.8929	3.5714	3.5865	3.6054	3.6516	3.5812
neg_4871	Valproic Acid beta-D-Glucuronide	metab_12041	yes	-	neg	-	341.124	5.92348	M+Na-2H	C14H24O8	0	44.8	HMDB0259755	-	-	-	-	-	Organic oxygen compounds	Organooxygen compounds	Carbohydrates and carbohydrate conjugates	0	44.8	-	-	1.4909	1.4843	2.503e-08	1.141e-06	5.8233	5.9182	5.85	5.8711	5.8653	5.2056	5.0968	5.193	5.1248	5.0398
neg_5038	Oleandomycin	metab_12226	yes	C01946	neg	3922-90-5	722.389	5.77002	M+Cl	C35H61NO12	0	65	LMPK04000007;HMDB0255932	Antibiotics	Polyketides and nonribosomal peptides	map01052;map01100;map00522;map01110;map02010	Metabolism;Metabolism;Metabolism;Metabolism;Environmental Information Processing	Metabolism of terpenoids and polyketides;Global and overview maps;Metabolism of terpenoids and polyketides;Global and overview maps;Membrane transport	Organic oxygen compounds	Organooxygen compounds	Carbohydrates and carbohydrate conjugates	0	65	Type I polyketide structures;Metabolic pathways;Biosynthesis of 12-, 14- and 16-membered macrolides;Biosynthesis of secondary metabolites;ABC transporters	Type I polyketide structures;Metabolic pathways;Biosynthesis of 12-, 14- and 16-membered macrolides;Biosynthesis of secondary metabolites;ABC transporters	1.2666	1.259	7.304e-06	2.661e-05	6.0815	5.9589	6.1351	6.0907	6.2134	5.556	5.5443	5.4381	5.6476	5.5721
neg_5168	Eugenol O-[a-L-Arabinofuranosyl-(1->6)-b-D-glucopyranoside]	metab_12370	yes	-	neg	229333-98-6	493.147	5.5652	M+Cl	C21H30O11	0	31	HMDB0037603	-	-	-	-	-	Organic oxygen compounds	Organooxygen compounds	Carbohydrates and carbohydrate conjugates	0	31	-	-	1.2083	1.2266	0.007051	0.009992	4.2287	5.0602	4.5256	5.1582	4.7271	5.4193	5.3212	5.2819	5.3842	5.4007
neg_5278	Gein	metab_12492	yes	C17058	neg	585-90-0	493.146	5.39572	M+Cl	C21H30O11	0	37.8	HMDB0029909	Steroids	24-Carbon atoms	-	-	-	Organic oxygen compounds	Organooxygen compounds	Carbohydrates and carbohydrate conjugates	0	37.8	-	-	1.0494	1.0598	0.002677	0.004068	4.9565	5.4231	5.2247	5.547	5.3049	5.8015	5.7332	5.6588	5.7455	5.7125
neg_6408	Isopropyl beta-D-glucoside	metab_13742	yes	-	neg	5391-17-3	489.22	3.8563	2M+FA-H	C9H18O6	0	65.2	HMDB0032705	-	-	-	-	-	Organic oxygen compounds	Organooxygen compounds	Carbohydrates and carbohydrate conjugates	0	65.2	-	-	1.0833	1.0875	0.0001795	0.0003604	5.0751	5.2461	5.1432	4.9761	5.0877	4.7222	4.7054	4.5291	4.6399	4.8136
neg_6697	Ribostamycin	metab_14061	yes	C01759	neg	25546-65-0	475.204	3.54882	M+Na-2H	C17H34N4O10	0	78.6	HMDB0257216	-	-	map01110;map00524	Metabolism;Metabolism	Global and overview maps;Biosynthesis of other secondary metabolites	Organic oxygen compounds	Organooxygen compounds	Carbohydrates and carbohydrate conjugates	0	78.6	Biosynthesis of secondary metabolites;Neomycin, kanamycin and gentamicin biosynthesis	Biosynthesis of secondary metabolites;Neomycin, kanamycin and gentamicin biosynthesis	1.0912	1.0841	8.872e-08	1.616e-06	6.7554	6.7484	6.686	6.6773	6.6876	6.3175	6.3008	6.296	6.3702	6.301
neg_6789	2,3-Butanediol apiosylglucoside	metab_14162	yes	-	neg	-	383.157	3.46212	M-H	C15H28O11	0	41.4	HMDB0033063	-	-	-	-	-	Organic oxygen compounds	Organooxygen compounds	Carbohydrates and carbohydrate conjugates	0	41.4	-	-	1.0001	1.0047	0.02169	0.0286	3.7954	4.3711	3.7743	4.3664	3.6428	4.5377	4.5366	4.4197	4.5344	4.2717
neg_6821	5,6-Dihydro-5-azacytidine	metab_14199	yes	-	neg	-	267.073	3.43075	M+Na-2H	C8H14N4O5	0	54.1	HMDB0246860	-	-	-	-	-	Organic oxygen compounds	Organooxygen compounds	Carbohydrates and carbohydrate conjugates	0	54.1	-	-	1.4967	1.4883	9.508e-09	5.95e-07	6.2254	6.1245	6.1669	6.1812	6.2636	5.4539	5.4979	5.4142	5.4967	5.4102
neg_7048	D-Fucitol	metab_14451	yes	-	neg	-	391.184	3.24093	2M+Hac-H	C6H14O5	0	45.7	HMDB0304954	-	-	-	-	-	Organic oxygen compounds	Organooxygen compounds	Carbohydrates and carbohydrate conjugates	0	45.7	-	-	1.2318	1.2225	3.821e-07	2.628e-06	7.0482	7.0582	6.9265	6.9784	6.9435	6.4741	6.4755	6.4655	6.5668	6.4556
neg_7252	D-erythro-L-galacto-Nonulose	metab_14676	yes	-	neg	-	251.077	1.69075	M-H2O-H	C9H18O9	0	37.7	HMDB0029955	-	-	-	-	-	Organic oxygen compounds	Organooxygen compounds	Carbohydrates and carbohydrate conjugates	0	37.7	-	-	1.9205	1.9176	1.535e-06	7.93e-06	7.0531	6.5545	6.9166	6.6234	6.768	5.4326	5.4898	5.5063	5.6172	5.6311
neg_7315	N-Acetyl-9-O-acetylneuraminic acid	metab_14745	yes	-	neg	55717-54-9	350.109	1.24373	M-H	C13H21NO10	0	46.2	HMDB0000794	-	-	-	-	-	Organic oxygen compounds	Organooxygen compounds	Carbohydrates and carbohydrate conjugates	0	46.2	-	-	1.9848	1.9887	3.507e-07	2.459e-06	6.5953	6.825	6.6417	6.7349	6.7347	5.499	5.5344	5.4841	5.1286	5.2977
neg_7389	Lacto-N-biose I	metab_14824	yes	C06372	neg	50787-09-2	418.112	0.9539	M+Cl	C14H25NO11	0	34.6	HMDB0006575;HMDB0252594	Carbohydrates	Oligosaccharides	-	-	-	Organic oxygen compounds	Organooxygen compounds	Carbohydrates and carbohydrate conjugates	0	34.6	-	-	1.839	1.8405	4.496e-08	1.578e-06	6.7403	6.787	6.7905	6.8094	6.9101	5.7319	5.7634	5.7565	5.4971	5.6707
neg_2980	Erythromycin C	metab_15374	yes	C01912	neg	114-07-8	756.395	5.77787	M+K-2H	C36H65NO13	0	66.3	LMPK04000009;HMDB0014344;HMDB0251935	Antibiotics	Polyketides and nonribosomal peptides	map01052;map01100;map00522;map01110	Metabolism;Metabolism;Metabolism;Metabolism	Metabolism of terpenoids and polyketides;Global and overview maps;Metabolism of terpenoids and polyketides;Global and overview maps	Organic oxygen compounds	Organooxygen compounds	Carbohydrates and carbohydrate conjugates	0	66.3	Type I polyketide structures;Metabolic pathways;Biosynthesis of 12-, 14- and 16-membered macrolides;Biosynthesis of secondary metabolites	Type I polyketide structures;Metabolic pathways;Biosynthesis of 12-, 14- and 16-membered macrolides;Biosynthesis of secondary metabolites	1.8247	1.8114	1.852e-06	9.16e-06	6.0915	5.8833	6.1777	6.2826	6.2287	4.9315	4.9965	5.0586	5.2201	4.8839
neg_2794	3-Amino-9-ethylcarbazole	metab_9743	yes	-	neg	-	255.114	5.40355	M+FA-H	C14H14N2	0	35.6	HMDB0245810	-	-	-	-	-	Organoheterocyclic compounds	Indoles and derivatives	Carbazoles	0	35.6	-	-	1.5063	1.5144	1.256e-05	4.072e-05	4.6849	4.9485	4.7222	4.8163	4.8988	4.223	4.0345	4.0804	3.8197	4.0276
neg_3041	Apomine	metab_10017	yes	-	neg	-	607.315	5.86867	M+FA-H	C28H52O7P2	0	52.3	HMDB0248525	-	-	-	-	-	Organic acids and derivatives	Organic phosphonic acids and derivatives	Bisphosphonates	0	52.3	-	-	1.6218	1.6102	6.46e-05	0.0001525	4.729	4.5325	4.7279	5.0241	5.2016	3.891	3.9694	3.925	3.9712	3.9008
pos_2296	Sacubitril	metab_1432	yes	-	pos	-	376.187	3.15305	M+H-2H2O	C24H29NO5	0	46.1	HMDB0257439	-	-	-	-	-	Benzenoids	Benzene and substituted derivatives	Biphenyls and derivatives	0	46.1	-	-	1.1146	1.1031	5.013e-07	1.557e-05	6.3497	6.3602	6.3756	6.3932	6.4242	6.0906	6.0049	6.0486	6.0889	6.0947
pos_5181	Ripisartan	metab_4605	yes	-	pos	-	459.223	5.8918	M+CH3OH+H	C23H22N8O	0	36.3	HMDB0257241	-	-	-	-	-	Benzenoids	Benzene and substituted derivatives	Biphenyls and derivatives	0	36.3	-	-	1.1129	1.1233	0.008101	0.0149	3.0404	3.4679	3.2101	3.6042	3.4636	3.8013	3.9297	3.785	3.7115	3.5886
neg_2193	VAPIPROST	metab_9080	yes	-	neg	-	498.258	4.35957	M+Na-2H	C30H39NO4	0	55.1	HMDB0259765	-	-	-	-	-	Benzenoids	Benzene and substituted derivatives	Biphenyls and derivatives	0	55.1	-	-	1.0696	1.0655	4.065e-05	0.0001038	5.6474	5.5102	5.64	5.5057	5.5839	5.1849	5.0633	5.2032	5.3012	5.1534
neg_2360	Adomeglivant	metab_9265	yes	-	neg	-	576.234	4.63315	M+Na-2H	C32H36F3NO4	0	40.3	HMDB0248020	-	-	-	-	-	Benzenoids	Benzene and substituted derivatives	Biphenyls and derivatives	0	40.3	-	-	1.1949	1.1886	0.0001648	0.0003355	5.553	5.5387	5.3512	5.2724	5.2805	4.8897	4.7816	5.0144	4.9728	4.8053
pos_3466	Biliverdin	metab_2720	yes	C00500	pos	114-25-0	583.255	6.21067	M+H	C33H34N4O6	71.9	0	PW_C000797;HMDB0001008	-	-	map01100;map01110;map00860	Metabolism;Metabolism;Metabolism	Global and overview maps;Global and overview maps;Metabolism of cofactors and vitamins	Organoheterocyclic compounds	Tetrapyrroles and derivatives	Bilirubins	71.9	0	Metabolic pathways;Biosynthesis of secondary metabolites;Porphyrin and chlorophyll metabolism	Metabolic pathways;Biosynthesis of secondary metabolites;Porphyrin and chlorophyll metabolism	1.5017	1.4877	0.003965	0.008124	4.559	5.3503	4.7944	4.9496	4.5811	5.7797	5.4499	5.4532	5.7233	5.2776
pos_5288	Urobilinogen	metab_7754	yes	C05790	pos	17208-65-0;14684-37-8	623.343	5.69948	M+CH3OH+H	C33H42N4O6	0	62.7	HMDB0001898;HMDB0004158	-	-	map00860	Metabolism	Metabolism of cofactors and vitamins	Organoheterocyclic compounds	Tetrapyrroles and derivatives	Bilirubins	0	62.7	Porphyrin and chlorophyll metabolism	Porphyrin and chlorophyll metabolism	1.9604	1.9341	0.000286	0.0008964	3.6985	3.1298	3.139	3.8019	3.1558	4.2351	4.7231	4.4113	4.3177	4.4873
pos_115	TAURODEOXYCHOLIC ACID	metab_168	yes	C05463	pos	516-50-7	500.304	6.32127	M+H, M+Na, M+CH3OH+H	C26H45NO6S	81.7	0	PW_C000715;HMDB0000896;LMST05040013	-	-	-	-	-	Lipids and lipid-like molecules	Steroids and steroid derivatives	Bile acids, alcohols and derivatives	81.7	0	-	-	1.4813	1.4695	2.878e-07	1.116e-05	6.4748	6.4479	6.567	6.5835	6.5921	7.138	7.0701	7.0939	7.0291	7.1292
pos_1277	Bisnorcholic acid	metab_308	yes	-	pos	-	403.247	6.1152	M+H, M+Na	C22H36O5	0	57.3	HMDB0002082;LMST04050005	-	-	-	-	-	Lipids and lipid-like molecules	Steroids and steroid derivatives	Bile acids, alcohols and derivatives	0	57.3	-	-	1.6385	1.6152	0.0002262	0.0007399	5.3191	5.4196	5.376	5.4552	5.4044	4.7793	4.8488	4.6962	4.7821	4.2255
pos_129	Cholylmethionine	metab_322	yes	-	pos	-	504.314	6.21067	M+H-2H2O, M+H-H2O, M+H	C29H49NO6S	0	51.8	HMDB0242382	-	-	-	-	-	Lipids and lipid-like molecules	Steroids and steroid derivatives	Bile acids, alcohols and derivatives	0	51.8	-	-	1.1569	1.1408	0.0001089	0.0004171	6.3057	6.4425	6.2929	6.4647	6.4407	6.0778	6.0733	5.9828	6.1087	5.9237
pos_1351	Taurohyocholic Acid	metab_391	yes	C15516	pos	117997-17-8	516.299	5.99563	M+H, 2M+H	C26H45NO7S	81.9	0	LMST05040010;HMDB0011637;MJDBDZS0000018	-	-	-	-	-	Lipids and lipid-like molecules	Steroids and steroid derivatives	Bile acids, alcohols and derivatives	81.9	0	-	-	1.014	1.0073	8.95e-05	0.0003588	7.1908	7.0781	7.2714	7.2735	7.262	7.4968	7.4847	7.4824	7.4766	7.5194
pos_3191	7alpha-hydroxy-3-oxochol-4-en-24-oic Acid	metab_2421	yes	-	pos	14772-95-3	411.249	5.5471	M+Na	C24H36O4	0	69.5	HMDB0062744;LMST04010239	-	-	-	-	-	Lipids and lipid-like molecules	Steroids and steroid derivatives	Bile acids, alcohols and derivatives	0	69.5	-	-	2.3315	2.3229	0.04154	0.06074	0.0082	0.0081	0.0083	0.0086	0.0086	3.7632	3.6971	3.0848	0.007	0.0065
pos_32	Tauroursodeoxycholic acid	metab_2430	yes	C16868	pos	14605-22-2	464.282	6.0993	M+H-2H2O, M+H, M+Na, M+NH4	C26H45NO6S	0	66	LMST05040015;HMDB0000874	-	-	-	-	-	Lipids and lipid-like molecules	Steroids and steroid derivatives	Bile acids, alcohols and derivatives	0	66	-	-	1.2142	1.2047	2.616e-06	4.334e-05	6.8688	6.9125	7.0051	7.0182	7.0182	7.3412	7.3257	7.3415	7.3347	7.3829
pos_3339	Cholylhistidine	metab_2582	yes	-	pos	-	546.353	5.94782	M+H	C30H47N3O6	0	68	HMDB0242389	-	-	-	-	-	Lipids and lipid-like molecules	Steroids and steroid derivatives	Bile acids, alcohols and derivatives	0	68	-	-	1.7757	1.7575	4.842e-07	1.52e-05	5.7587	5.9516	5.7922	5.9219	5.9253	5.0166	5.0455	5.1326	5.1856	4.9776
pos_3492	Taurochenodeoxycholic Acid	metab_2749	yes	C05465	pos	516-35-8;53-02-1	517.33	6.25773	M+NH4	C26H45NO6S	66.6	0	HMDB0000951;LMST05040005;HMDB0242411;HMDB0000949;MJDBOTE0001075	-	-	map04976;map04979;map00121;map00120	Organismal Systems;Organismal Systems;Metabolism;Metabolism	Digestive system;Digestive system;Lipid metabolism;Lipid metabolism	Lipids and lipid-like molecules	Steroids and steroid derivatives	Bile acids, alcohols and derivatives	66.6	0	Bile secretion;Cholesterol metabolism;Secondary bile acid biosynthesis;Primary bile acid biosynthesis	Bile secretion;Cholesterol metabolism;Secondary bile acid biosynthesis;Primary bile acid biosynthesis	1.1448	1.1363	4.105e-06	4.363e-05	7.0944	7.0198	7.1764	7.16	7.1583	7.4879	7.4648	7.4548	7.4269	7.4694
pos_3578	5beta-Cholanic acid	metab_2841	yes	C19642	pos	546-18-9	383.294	6.56792	M+Na	C24H40O2	0	31.8	HMDB0247018	-	-	-	-	-	Lipids and lipid-like molecules	Steroids and steroid derivatives	Bile acids, alcohols and derivatives	0	31.8	-	-	1.7199	1.6984	6.01e-06	4.363e-05	6.4332	6.3048	6.3421	6.389	6.4392	5.6936	5.543	5.4885	5.8531	5.5241
pos_3589	27-Norcholestanehexol	metab_2853	yes	-	pos	91999-66-5	419.315	6.59972	M+H-2H2O	C26H46O6	0	72.8	LMST04020029;HMDB0002157	-	-	-	-	-	Lipids and lipid-like molecules	Steroids and steroid derivatives	Bile acids, alcohols and derivatives	0	72.8	-	-	1.5507	1.539	0.0001636	0.0005763	4.9678	4.7456	4.7568	4.8663	5.0657	4.1878	4.0538	4.3778	4.0951	4.4384
pos_3675	20a,22b-Dihydroxycholesterol	metab_2947	yes	C05501	pos	15234-55-6	401.341	6.8541	M+H-H2O	C27H46O3	0	66.4	HMDB0006763;PW_C002915	-	-	map01100;map00140	Metabolism;Metabolism	Global and overview maps;Lipid metabolism	Lipids and lipid-like molecules	Steroids and steroid derivatives	Bile acids, alcohols and derivatives	0	66.4	Metabolic pathways;Steroid hormone biosynthesis	Metabolic pathways;Steroid hormone biosynthesis	1.7668	1.7552	2.241e-08	2.11e-06	3.8794	3.8755	3.8847	3.9043	3.9015	4.7918	4.6828	4.5646	4.6655	4.6809
pos_4569	Ponasterone A	metab_3932	yes	C08835	pos	13408-56-5	447.308	6.5361	M+H-H2O	C27H44O6	0	63	HMDB0256697;LMST01010195	-	-	-	-	-	Lipids and lipid-like molecules	Steroids and steroid derivatives	Bile acids, alcohols and derivatives	0	63	-	-	1.2137	1.2353	0.02914	0.04489	5.0615	5.1764	5.2088	4.76	4.9643	4.9618	4.4197	4.1536	4.8951	4.0745
pos_4581	Tauroursocholic acid	metab_3945	yes	-	pos	86386-60-9	538.281	6.52018	M+Na	C26H45NO7S	0	58.3	LMST05040014;HMDB0000889	-	-	-	-	-	Lipids and lipid-like molecules	Steroids and steroid derivatives	Bile acids, alcohols and derivatives	0	58.3	-	-	1.1783	1.1718	0.000331	0.001014	5.8473	5.8262	6.0772	6.0909	6.0508	6.459	6.2907	6.3323	6.366	6.377
pos_4589	7-Methyl-cholic acid	metab_3953	yes	-	pos	-	440.337	6.5122	M+NH4	C25H42O5	0	54.4	HMDB0244296	-	-	-	-	-	Lipids and lipid-like molecules	Steroids and steroid derivatives	Bile acids, alcohols and derivatives	0	54.4	-	-	1.1083	1.0954	0.0007639	0.001996	6.4697	6.3993	6.4575	6.4287	6.5055	6.2183	6.1603	5.9708	6.2451	5.9448
pos_4865	Nutriacholic acid	metab_4256	yes	-	pos	4651-67-6	408.31	6.17085	M+NH4	C24H38O4	0	84.5	HMDB0000467	-	-	-	-	-	Lipids and lipid-like molecules	Steroids and steroid derivatives	Bile acids, alcohols and derivatives	0	84.5	-	-	1.3562	1.3433	1.763e-08	1.786e-06	6.5303	6.5223	6.4908	6.5265	6.5595	6.0923	6.1044	6.0065	6.0717	6.0428
pos_4908	Glycochenodeoxycholate-3-sulfate	metab_4304	yes	-	pos	67030-54-0	562.304	6.12315	M+CH3OH+H	C26H43NO8S	0	67.7	HMDB0002497	-	-	-	-	-	Lipids and lipid-like molecules	Steroids and steroid derivatives	Bile acids, alcohols and derivatives	0	67.7	-	-	2.2304	2.2254	1.336e-05	8.175e-05	4.6075	4.4227	4.5195	4.5356	4.1406	3.1217	2.7561	3.3934	3.0613	3.334
pos_4946	Cholylarginine	metab_4346	yes	-	pos	-	565.396	6.09132	M+H	C30H52N4O6	0	58.2	HMDB0242375	-	-	-	-	-	Lipids and lipid-like molecules	Steroids and steroid derivatives	Bile acids, alcohols and derivatives	0	58.2	-	-	1.8673	1.852	6.883e-07	1.914e-05	6.9433	7.2379	6.8821	7.0787	6.9968	7.9006	7.9712	7.9122	7.9427	7.8699
pos_5174	Chenodeoxycholyltryptophan	metab_4597	yes	-	pos	-	623.343	5.8998	M+2Na-H	C35H50N2O5	0	53.3	HMDB0242395	-	-	-	-	-	Lipids and lipid-like molecules	Steroids and steroid derivatives	Bile acids, alcohols and derivatives	0	53.3	-	-	2.4537	2.4469	0.01894	0.0311	3.8081	0.5863	0.5931	3.742	2.1171	4.2448	4.3914	4.3046	4.0237	4.3713
pos_864	3-Oxocholic acid	metab_7544	yes	-	pos	2304-89-4	424.305	6.1152	M+NH4, M+Na	C24H38O5	0	67.2	LMST04010443;HMDB0000502	-	-	-	-	-	Lipids and lipid-like molecules	Steroids and steroid derivatives	Bile acids, alcohols and derivatives	0	67.2	-	-	1.6684	1.6469	9.484e-07	2.315e-05	6.0373	6.0151	5.9143	5.905	6.0112	5.3429	5.2046	5.3128	5.3616	5.1253
pos_9	Taurocholic Acid	metab_7583	yes	C05122	pos	81-24-3	533.325	6.13112	M+CH3OH+H, 2M+H, M+2Na-H, M+NH4, M+H-H2O	C26H45NO7S	90.6	0	LMST05040001;HMDB0000036;PW_C000025;MJDBOTE0000483	Steroids	24-Carbon atoms	map01100;map04979;map00430;map00121;map04976;map00120	Metabolism;Organismal Systems;Metabolism;Metabolism;Organismal Systems;Metabolism	Global and overview maps;Digestive system;Metabolism of other amino acids;Lipid metabolism;Digestive system;Lipid metabolism	Lipids and lipid-like molecules	Steroids and steroid derivatives	Bile acids, alcohols and derivatives	90.6	0	Metabolic pathways;Cholesterol metabolism;Taurine and hypotaurine metabolism;Secondary bile acid biosynthesis;Bile secretion;Primary bile acid biosynthesis	Metabolic pathways;Cholesterol metabolism;Taurine and hypotaurine metabolism;Secondary bile acid biosynthesis;Bile secretion;Primary bile acid biosynthesis	1.1148	1.1056	1.292e-06	2.818e-05	7.7243	7.7351	7.8021	7.821	7.823	8.1265	8.1002	8.0979	8.0546	8.1222
pos_93	26-Glucosyl-1,3,11,22-tetrahydroxyergosta-5,24-dien-26-oate	metab_7617	yes	-	pos	155510-75-1	639.371	3.90663	M+H, M+Na, M+2H	C34H54O11	0	63.2	HMDB0040405	-	-	-	-	-	Lipids and lipid-like molecules	Steroids and steroid derivatives	Bile acids, alcohols and derivatives	0	63.2	-	-	1.4317	1.4321	0.0003758	0.00112	6.5196	6.1896	6.4207	6.1449	6.2381	5.647	5.7062	5.5945	5.978	5.7273
pos_987	7b-Hydroxy-3-oxo-5b-cholanoic acid	metab_7680	yes	-	pos	77060-26-5	441.243	7.06023	M+CH3OH+H, M+K	C25H38O4	0	45.2	HMDB0000541	-	-	-	-	-	Lipids and lipid-like molecules	Steroids and steroid derivatives	Bile acids, alcohols and derivatives	0	45.2	-	-	1.2631	1.2506	4.555e-06	4.363e-05	5.8492	5.8767	5.9102	5.9233	5.9774	5.6109	5.4898	5.5034	5.4497	5.4373
neg_1978	N-[(3a,5b,7a,12a)-3,12-dihydroxy-24-oxo-7-(sulfooxy)cholan-24-yl]-Glycine	metab_8841	yes	-	neg	71977-73-6	544.262	4.037	M-H	C26H43NO9S	0	76.6	HMDB0002640	-	-	-	-	-	Lipids and lipid-like molecules	Steroids and steroid derivatives	Bile acids, alcohols and derivatives	0	76.6	-	-	1.5801	1.5682	2.413e-06	1.107e-05	6.0878	6.129	5.9716	5.8808	5.9267	5.1328	5.0834	5.1348	5.3695	5.094
neg_2102	N-[(3a,5b,7a,12a)-3,7-dihydroxy-24-oxo-12-(sulfooxy)cholan-24-yl]-Glycine	metab_8980	yes	-	neg	74723-17-4	544.262	4.19432	M-H	C26H43NO9S	0	71.4	HMDB0002644	-	-	-	-	-	Lipids and lipid-like molecules	Steroids and steroid derivatives	Bile acids, alcohols and derivatives	0	71.4	-	-	1.1211	1.1187	2.46e-05	6.928e-05	5.6397	5.3932	5.5024	5.4128	5.4867	5.0218	5.0063	5.0374	5.1474	5.0536
neg_3272	Cholyltyrosine	metab_10271	yes	-	neg	-	570.343	6.1884	M-H	C33H49NO7	0	80.3	HMDB0242377	-	-	-	-	-	Lipids and lipid-like molecules	Steroids and steroid derivatives	Bile acids, alcohols and derivatives	0	80.3	-	-	1.2379	1.2304	8.729e-08	1.616e-06	7.6769	7.584	7.6625	7.6625	7.677	7.1392	7.1755	7.1216	7.2087	7.082
neg_3798	Taurochenodeoxycholate-7-sulfate	metab_10851	yes	-	neg	66874-12-2	578.246	7.60143	M-H	C26H45NO9S2	0	84.1	LMST05020030;HMDB0002498	-	-	-	-	-	Lipids and lipid-like molecules	Steroids and steroid derivatives	Bile acids, alcohols and derivatives	0	84.1	-	-	1.0582	1.0574	3.648e-06	1.54e-05	6.6163	6.74	6.71	6.7803	6.766	7.0517	7.1584	7.1196	7.1071	7.0847
neg_3957	Taurochenodeoxycholate-3-sulfate	metab_11027	yes	-	neg	67030-59-5	288.619	7.5936	M-2H	C26H45NO9S2	0	86.7	HMDB0002486;LMST05020029	-	-	-	-	-	Lipids and lipid-like molecules	Steroids and steroid derivatives	Bile acids, alcohols and derivatives	0	86.7	-	-	1.0897	1.0882	1.455e-06	7.611e-06	6.6481	6.7509	6.7304	6.8136	6.7717	7.0921	7.188	7.162	7.1516	7.1298
neg_4306	3beta,7alpha-Dihydroxy-5-cholestenoate	metab_11415	yes	C17335	neg	115538-84-6	431.316	6.61715	M-H	C27H44O4	0	66	HMDB0012454;PW_C007981	-	-	map00120	Metabolism	Lipid metabolism	Lipids and lipid-like molecules	Steroids and steroid derivatives	Bile acids, alcohols and derivatives	0	66	Primary bile acid biosynthesis	Primary bile acid biosynthesis	1.0539	1.0722	0.01753	0.02345	4.6231	4.0785	4.1096	4.0903	4.7764	4.702	4.9323	4.6169	4.9199	5.0603
neg_4324	Chenodeoxycholylalanine	metab_11435	yes	-	neg	-	444.312	6.5937	M-H2O-H	C27H45NO5	0	51.8	HMDB0242390	-	-	-	-	-	Lipids and lipid-like molecules	Steroids and steroid derivatives	Bile acids, alcohols and derivatives	0	51.8	-	-	1.0736	1.0717	0.003161	0.004747	6.4717	7.0127	6.4311	6.6085	6.5307	6.1813	6.1799	6.2417	6.0846	6.1117
neg_4381	7alpha-Hydroxy-3-oxo-4-cholestenoate	metab_11498	yes	C17337	neg	115538-85-7	429.297	6.51547	M-H	C27H42O4	0	80.3	HMDB0012458;PW_C007985	-	-	map00120	Metabolism	Lipid metabolism	Lipids and lipid-like molecules	Steroids and steroid derivatives	Bile acids, alcohols and derivatives	0	80.3	Primary bile acid biosynthesis	Primary bile acid biosynthesis	1.8697	1.8582	1.584e-08	8.34e-07	6.1613	6.0607	6.1391	6.1963	6.3173	5.0709	5.0194	4.9799	5.1054	4.9464
neg_4399	5alpha-Cyprinol	metab_11517	yes	C16890	neg	2952-70-7	433.332	6.49982	M-H2O-H	C27H48O5	0	57.9	HMDB0247015	-	-	-	-	-	Lipids and lipid-like molecules	Steroids and steroid derivatives	Bile acids, alcohols and derivatives	0	57.9	-	-	1.15	1.1463	0.000109	0.0002366	4.9314	4.7324	4.9127	4.5962	4.7366	5.239	5.293	5.2838	5.2113	5.1918
neg_4536	Cholylcysteine	metab_11670	yes	-	neg	-	492.278	6.31248	M-H2O-H	C27H45NO6S	0	46.9	HMDB0242372	-	-	-	-	-	Lipids and lipid-like molecules	Steroids and steroid derivatives	Bile acids, alcohols and derivatives	0	46.9	-	-	1.8902	1.8836	2.636e-09	2.424e-07	6.3991	6.4434	6.4399	6.4203	6.4163	5.3244	5.3299	5.1462	5.2792	5.1506
neg_4577	Cholyltryptophan	metab_11715	yes	-	neg	-	593.36	6.25042	M-H	C35H50N2O6	0	33.1	HMDB0242374	-	-	-	-	-	Lipids and lipid-like molecules	Steroids and steroid derivatives	Bile acids, alcohols and derivatives	0	33.1	-	-	1.0406	1.0298	7.457e-07	4.485e-06	6.6401	6.6333	6.6226	6.6592	6.7249	6.2752	6.3153	6.3022	6.353	6.2429
neg_4618	Monoketocholic acid	metab_11761	yes	-	neg	-	421.259	6.1884	M-H	C24H38O6	0	70.8	HMDB0254862	-	-	-	-	-	Lipids and lipid-like molecules	Steroids and steroid derivatives	Bile acids, alcohols and derivatives	0	70.8	-	-	1.5522	1.5415	9.422e-08	1.616e-06	6.2853	6.1827	6.1517	6.1576	6.1914	5.4104	5.3993	5.3267	5.5277	5.3231
neg_4630	6-Ethylchenodeoxycholic acid	metab_11775	yes	C15636	neg	459789-99-2	465.321	6.17272	M+FA-H	C26H44O4	0	55.5	HMDB0247056	-	-	-	-	-	Lipids and lipid-like molecules	Steroids and steroid derivatives	Bile acids, alcohols and derivatives	0	55.5	-	-	1.0491	1.0417	8.454e-07	4.966e-06	6.4485	6.3195	6.3636	6.3933	6.4226	6.0151	6.0375	6.0196	6.0662	5.9744
neg_4632	Chenodeoxycholyltaurine	metab_11777	yes	C05465	neg	516-35-8;53-02-1	997.587	6.1649	2M-H	C26H45NO6S	0	74.6	HMDB0000951;HMDB0242411;HMDB0000949	-	-	map04976;map04979;map00121;map00120	Organismal Systems;Organismal Systems;Metabolism;Metabolism	Digestive system;Digestive system;Lipid metabolism;Lipid metabolism	Lipids and lipid-like molecules	Steroids and steroid derivatives	Bile acids, alcohols and derivatives	0	74.6	Bile secretion;Cholesterol metabolism;Secondary bile acid biosynthesis;Primary bile acid biosynthesis	Bile secretion;Cholesterol metabolism;Secondary bile acid biosynthesis;Primary bile acid biosynthesis	2.3376	2.3247	3.069e-10	4.233e-08	5.1309	5.1264	5.1238	5.1382	5.1242	6.9419	6.8958	6.9916	6.7508	7.0287
neg_470	3-Dehydroteasterone	metab_11851	yes	C15792	neg	124853-28-7	445.332	6.67192	M-H, M+Na-2H	C28H46O4	0	72.5	HMDB0041527;LMST01030131	-	-	map01100;map00905;map01110	Metabolism;Metabolism;Metabolism	Global and overview maps;Metabolism of terpenoids and polyketides;Global and overview maps	Lipids and lipid-like molecules	Steroids and steroid derivatives	Bile acids, alcohols and derivatives	0	72.5	Metabolic pathways;Brassinosteroid biosynthesis;Biosynthesis of secondary metabolites	Metabolic pathways;Brassinosteroid biosynthesis;Biosynthesis of secondary metabolites	1.6509	1.6353	0.000112	0.0002423	5.4442	5.8492	5.6808	5.6654	5.7906	5.0569	4.3985	4.6502	4.931	4.6308
neg_4726	Cholyllysine	metab_11880	yes	-	neg	-	535.375	6.0272	M-H	C30H52N2O6	0	68.9	HMDB0242379	-	-	-	-	-	Lipids and lipid-like molecules	Steroids and steroid derivatives	Bile acids, alcohols and derivatives	0	68.9	-	-	1.812	1.7902	0.000106	0.0002311	6.51	6.3858	6.6168	6.6268	6.7262	5.2539	5.5235	5.6783	5.7626	4.936
neg_5073	Chenodeoxycholylmethionine	metab_12265	yes	-	neg	-	568.335	5.7088	M+FA-H	C29H49NO5S	0	67.8	HMDB0242403	-	-	-	-	-	Lipids and lipid-like molecules	Steroids and steroid derivatives	Bile acids, alcohols and derivatives	0	67.8	-	-	1.1132	1.1056	7.902e-06	2.825e-05	5.831	5.7275	5.7751	5.7537	5.7382	5.3369	5.334	5.339	5.4764	5.2437
neg_60	2-Deoxycastasterone	metab_13291	yes	C15793	neg	87734-68-7	447.348	6.53893	M+Cl, M+FA-H, M-H	C28H48O4	0	38.2	HMDB0034423	-	-	map01100;map00905;map01110	Metabolism;Metabolism;Metabolism	Global and overview maps;Metabolism of terpenoids and polyketides;Global and overview maps	Lipids and lipid-like molecules	Steroids and steroid derivatives	Bile acids, alcohols and derivatives	0	38.2	Metabolic pathways;Brassinosteroid biosynthesis;Biosynthesis of secondary metabolites	Metabolic pathways;Brassinosteroid biosynthesis;Biosynthesis of secondary metabolites	1.5694	1.5635	0.002459	0.003763	4.7855	4.4338	5.1505	5.2858	5.1077	4.3619	3.6074	3.6263	4.2923	4.0558
neg_746	Sulfolithocholic acid	metab_14902	yes	-	neg	34669-57-3	455.251	4.02917	M-H, M+Cl	C24H40O6S	0	30.5	LMST05020015;HMDB0000907	-	-	-	-	-	Lipids and lipid-like molecules	Steroids and steroid derivatives	Bile acids, alcohols and derivatives	0	30.5	-	-	1.0431	1.0381	1.192e-05	3.898e-05	5.9445	5.8338	5.9051	5.812	5.8687	5.4264	5.5095	5.5153	5.6047	5.4556
neg_1675	Cyclacillin	metab_8505	yes	C12766	neg	3485-14-1	322.126	3.63497	M-H2O-H	C15H23N3O4S	0	32.1	HMDB0015135	-	-	-	-	-	Organoheterocyclic compounds	Lactams	Beta lactams	0	32.1	-	-	1.3203	1.314	1.904e-06	9.323e-06	5.5786	5.4492	5.5034	5.3728	5.43	4.8359	4.8766	4.8938	4.9969	4.8024
pos_5528	Scopolamine	metab_4985	yes	C01851	pos	51-34-3	321.18	5.19377	M+NH4	C17H21NO4	0	57.1	HMDB0003573;MJDBOTE0001028	-	-	map01100;map00960;map01064;map01110	Metabolism;Metabolism;Metabolism;Metabolism	Global and overview maps;Biosynthesis of other secondary metabolites;Chemical structure transformation maps;Global and overview maps	Organic acids and derivatives	Hydroxy acids and derivatives	Beta hydroxy acids and derivatives	0	57.1	Metabolic pathways;Tropane, piperidine and pyridine alkaloid biosynthesis;Biosynthesis of alkaloids derived from ornithine, lysine and nicotinic acid;Biosynthesis of secondary metabolites	Metabolic pathways;Tropane, piperidine and pyridine alkaloid biosynthesis;Biosynthesis of alkaloids derived from ornithine, lysine and nicotinic acid;Biosynthesis of secondary metabolites	1.2511	1.2308	6.037e-05	0.0002637	4.1452	3.9499	4.0534	4.0591	4.1876	3.7302	3.5912	3.7391	3.699	3.5769
neg_7333	Malic Acid	metab_15381	yes	C00149	neg	97-67-6;617-48-1;6915-15-7	133.013	1.11043	M-H	C4H6O5	97.4	0	PW_C000592;HMDB0000156;MJDBOTE0000694	Organic acids	Carboxylic acids	map01110;map05211;map01200;map00620;map00020;map00630;map04964;map00710;map04922;map01066;map01065;map04742;map01063;map01062;map01061;map01060;map01100;map01120;map05200;map00680;map01064;map00720;map02020;map05230;map01070	Metabolism;Human Diseases;Metabolism;Metabolism;Metabolism;Metabolism;Organismal Systems;Metabolism;Organismal Systems;Metabolism;Metabolism;Organismal Systems;Metabolism;Metabolism;Metabolism;Metabolism;Metabolism;Metabolism;Human Diseases;Metabolism;Metabolism;Metabolism;Environmental Information Processing;Human Diseases;Metabolism	Global and overview maps;Cancer: specific types;Global and overview maps;Carbohydrate metabolism;Carbohydrate metabolism;Carbohydrate metabolism;Excretory system;Energy metabolism;Endocrine system;Chemical structure transformation maps;Chemical structure transformation maps;Sensory system;Chemical structure transformation maps;Chemical structure transformation maps;Chemical structure transformati…	Organic acids and derivatives	Hydroxy acids and derivatives	Beta hydroxy acids and derivatives	97.4	0	Biosynthesis of secondary metabolites;Renal cell carcinoma;Carbon metabolism;Pyruvate metabolism;Citrate cycle (TCA cycle);Glyoxylate and dicarboxylate metabolism;Proximal tubule bicarbonate reclamation;Carbon fixation in photosynthetic organisms;Glucagon signaling pathway;Biosynthesis of alkaloids derived from terpenoid and polyketide;Biosynthesis of alkaloids derived from histidine and purine;T…	Biosynthesis of secondary metabolites;Renal cell carcinoma;Carbon metabolism;Pyruvate metabolism;Citrate cycle (TCA cycle);Glyoxylate and dicarboxylate metabolism;Proximal tubule bicarbonate reclamation;Carbon fixation in photosynthetic organisms;Glucagon signaling pathway;Biosynthesis of alkaloids derived from terpenoid and polyketide;Biosynthesis of alkaloids derived from histidine and purine;T…	1.0546	1.0506	5.282e-06	2.08e-05	7.4171	7.3396	7.3632	7.3091	7.289	6.928	6.9449	6.9217	7.072	6.9659
neg_4680	Benzetimide	metab_11829	yes	-	neg	-	399.148	6.08735	M+K-2H	C23H26N2O2	0	33.1	HMDB0248988	-	-	-	-	-	Organoheterocyclic compounds	Piperidines	Benzylpiperidines	0	33.1	-	-	1.6977	1.6966	8.627e-06	3.008e-05	5.4189	5.4941	5.5087	5.5065	5.4378	4.3607	4.8716	4.3947	4.4409	4.3705
pos_5331	Lotusine	metab_4770	yes	C17567	pos	6871-67-6	356.206	5.6036	M+ACN+H	C19H24NO3+	0	32.7	HMDB0033347	-	-	-	-	-	Organoheterocyclic compounds	Isoquinolines and derivatives	Benzylisoquinolines	0	32.7	-	-	1.2079	1.1945	0.001371	0.003264	3.323	3.6121	3.5571	3.3938	3.3803	3.0244	3.0693	3.019	3.2349	2.8063
neg_2749	Phenacyl	metab_9693	yes	-	neg	-	119.049	5.33688	M-H	C8H8O	0	38.5	HMDB0256388	-	-	-	-	-	Benzenoids	Benzene and substituted derivatives	Benzoyl derivatives	0	38.5	-	-	1.1038	1.0978	8.201e-06	2.907e-05	4.9114	4.7819	4.8948	4.816	4.9618	4.4019	4.5417	4.4733	4.466	4.411
pos_1392	Citpressine I	metab_436	yes	-	pos	81525-58-8	319.129	5.27377	M+H, M+NH4	C16H15NO5	0	46	HMDB0029323	-	-	-	-	-	Organoheterocyclic compounds	Quinolines and derivatives	Benzoquinolines	0	46	-	-	1.2492	1.2379	0.0001693	0.0005886	4.8794	5.0943	4.9582	5.2326	4.9895	5.501	5.4927	5.3886	5.4455	5.4488
pos_5337	Citrusinine I	metab_4776	yes	-	pos	86680-32-2	319.129	5.587	M+NH4	C16H15NO5	0	62	HMDB0030374	-	-	-	-	-	Organoheterocyclic compounds	Quinolines and derivatives	Benzoquinolines	0	62	-	-	1.0416	1.0284	0.0001923	0.0006519	5.0511	5.2631	5.1239	5.2347	5.0801	5.4476	5.4691	5.3834	5.4392	5.482
pos_1435	Dimethyl phthalate	metab_484	yes	C11233	pos	131-11-3	212.092	4.05197	M+H-H2O, M+NH4	C10H10O4	0	32	HMDB0251388	-	-	-	-	-	Benzenoids	Benzene and substituted derivatives	Benzoic acids and derivatives	0	32	-	-	1.1471	1.1395	1.731e-08	1.786e-06	4.2023	4.2205	4.2245	4.207	4.2231	4.5782	4.5808	4.5072	4.5426	4.5293
pos_2020	3-Hydroxyanthranilic acid	metab_1131	yes	C00632	pos	548-93-6	154.05	2.58815	M+H	C7H7NO3	56.9	0	HMDB0001476;PW_C001137	-	-	map01100;map00627;map00380;map01120;map01240	Metabolism;Metabolism;Metabolism;Metabolism;Metabolism	Global and overview maps;Xenobiotics biodegradation and metabolism;Amino acid metabolism;Global and overview maps;Global and overview maps	Benzenoids	Benzene and substituted derivatives	Benzoic acids and derivatives	56.9	0	Metabolic pathways;Aminobenzoate degradation;Tryptophan metabolism;Microbial metabolism in diverse environments;Biosynthesis of cofactors	Metabolic pathways;Aminobenzoate degradation;Tryptophan metabolism;Microbial metabolism in diverse environments;Biosynthesis of cofactors	1.0034	1.0115	0.01247	0.02162	3.8522	4.0969	4.2494	4.3154	4.4837	4.5337	4.579	4.5056	4.5346	4.5699
pos_3696	Ginkgoic acid	metab_2970	yes	C10794	pos	22910-60-7	379.281	6.94937	M+CH3OH+H	C22H34O3	0	37.9	HMDB0033897	-	-	-	-	-	Benzenoids	Benzene and substituted derivatives	Benzoic acids and derivatives	0	37.9	-	-	1.5857	1.5634	7.579e-05	0.0003175	5.0177	5.0032	4.6003	4.9982	5.1098	4.3224	4.2617	4.2553	4.303	4.2657
pos_5764	Aspirin	metab_5244	yes	C01405	pos	50-78-2	222.076	4.71235	M+ACN+H	C9H8O4	0	37.7	PW_C001251;HMDB0001879;MJDBOTE0001516	-	-	map04976	Organismal Systems	Digestive system	Benzenoids	Benzene and substituted derivatives	Benzoic acids and derivatives	0	37.7	Bile secretion	Bile secretion	1.1093	1.1055	0.0003421	0.001039	4.2744	4.5398	4.3814	4.5774	4.4886	4.8238	4.8424	4.782	4.7832	4.7491
pos_5836	Gabexate	metab_5324	yes	-	pos	-	385.186	4.55178	M+ACN+Na	C16H23N3O4	0	49.5	HMDB0252569	-	-	-	-	-	Benzenoids	Benzene and substituted derivatives	Benzoic acids and derivatives	0	49.5	-	-	1.0041	1.0026	0.0003407	0.001036	3.9594	4.0265	4.031	4.1979	4.1603	4.406	4.3378	4.3803	4.3592	4.3109
neg_4858	Acidissiminol epoxide	metab_12026	yes	-	neg	139165-01-8	454.22	5.93142	M+FA-H	C25H31NO4	0	47.8	HMDB0040793	-	-	-	-	-	Benzenoids	Benzene and substituted derivatives	Benzoic acids and derivatives	0	47.8	-	-	1.2061	1.1905	6.461e-05	0.0001525	5.3375	5.3419	5.3031	5.3685	5.3768	4.7077	4.8745	4.9611	5.0005	4.6822
neg_4870	{1-[2-(4-Carbamimidoyl-benzoylamino)-propionyl]-piperidin-4-yloxy}-acetic acid	metab_12040	yes	-	neg	-	357.156	5.92348	M-H2O-H	C18H24N4O5	0	63.1	HMDB0257277	-	-	-	-	-	Benzenoids	Benzene and substituted derivatives	Benzoic acids and derivatives	0	63.1	-	-	2.1037	2.1139	4.692e-06	1.888e-05	5.8143	5.7511	5.7862	5.782	5.7855	4.4814	4.4212	4.5425	3.7988	4.1122
neg_6687	Vanillic acid 4-O-sulfate	metab_14050	yes	-	neg	71235-86-4	246.992	3.56445	M-H	C8H8O7S	0	35.9	HMDB0041788	-	-	-	-	-	Benzenoids	Benzene and substituted derivatives	Benzoic acids and derivatives	0	35.9	-	-	1.1272	1.1285	8.981e-05	0.0002018	4.2877	4.3826	4.4326	4.549	4.631	4.9221	4.9497	4.9121	4.859	4.8973
neg_6696	Vanillic acid	metab_14060	yes	C06672	neg	121-34-6;3943-74-6;499-76-3	167.034	3.55663	M-H	C8H8O4	0	65.3	HMDB0000484;HMDB0240266;HMDB0004815	-	-	map00627;map01120	Metabolism;Metabolism	Xenobiotics biodegradation and metabolism;Global and overview maps	Benzenoids	Benzene and substituted derivatives	Benzoic acids and derivatives	0	65.3	Aminobenzoate degradation;Microbial metabolism in diverse environments	Aminobenzoate degradation;Microbial metabolism in diverse environments	1.3156	1.3075	7.752e-06	2.782e-05	3.5339	3.5294	3.6102	3.5412	3.5584	3.9984	4.3432	4.1213	4.1047	4.1413
neg_1491	1,4-Bisdesoxycyadox	metab_8302	yes	-	neg	-	220.064	3.42228	M-H2O-H	C12H9N5O	0	37.4	HMDB0244200	-	-	-	-	-	Organoheterocyclic compounds	Diazanaphthalenes	Benzodiazines	0	37.4	-	-	1.3237	1.3186	0.0008029	0.001362	3.2701	3.2656	3.263	3.792	3.2633	4.0938	4.1408	4.0792	3.7703	4.0076
neg_1758	3-(3,5-dihydroxyphenyl)-1-propanoic acid sulphate	metab_8597	yes	-	neg	-	261.007	3.74533	M-H	C9H10O7S	0	37.4	HMDB0061117	-	-	-	-	-	Benzenoids	Phenols	Benzenediols	0	37.4	-	-	1.1876	1.1903	3.03e-05	8.174e-05	4.3038	4.4566	4.1518	4.4107	4.41	4.871	4.8974	4.8543	4.7855	4.7985
neg_2154	5-(3',4',5'-Trihydroxyphenyl)-gamma-valerolactone-O-methyl-O-sulphate	metab_9037	yes	-	neg	-	333.029	4.27338	M-H	C12H14O9S	0	31	HMDB0060029	-	-	-	-	-	Benzenoids	Phenols	Benzenediols	0	31	-	-	1.4729	1.4711	1.127e-05	3.74e-05	4.1218	4.4601	4.2192	4.537	4.2597	5.0745	5.0771	5.0593	5.0695	5.0502
neg_2465	Kukoamine B	metab_9379	yes	C17616	neg	-	511.288	4.8492	M-H2O-H	C28H42N4O6	0	34.7	HMDB0060525	-	-	-	-	-	Benzenoids	Phenols	Benzenediols	0	34.7	-	-	1.6431	1.6327	8.809e-07	5.138e-06	6.3662	6.1307	6.3221	6.205	6.3182	5.2978	5.2904	5.3765	5.5609	5.3112
neg_6018	Rimiterol	metab_13312	yes	-	neg	-	445.23	4.2969	2M-H	C12H17NO3	0	42.9	HMDB0257235	-	-	-	-	-	Benzenoids	Phenols	Benzenediols	0	42.9	-	-	1.3933	1.3846	7.384e-08	1.616e-06	6.7736	6.8626	6.7026	6.758	6.7149	6.1518	6.1264	6.1205	6.1592	6.0469
neg_6190	3-[4-(sulfooxy)phenyl]propanoic acid	metab_13503	yes	-	neg	-	245.012	4.09187	M-H	C9H10O6S	0	53.8	HMDB0125171	-	-	-	-	-	Organic acids and derivatives	Organic sulfuric acids and derivatives	Arylsulfates	0	53.8	-	-	1.016	1.0032	5.23e-05	0.0001279	3.8556	3.7793	3.7413	3.8445	3.6786	4.1496	4.1914	4.1127	4.024	4.1934
neg_777	Tiamenidine	metab_15113	yes	-	neg	-	214.021	1.88633	M-H, M+FA-H	C8H10ClN3S	0	35	HMDB0259067	-	-	-	-	-	Organohalogen compounds	Aryl halides	Aryl chlorides	0	35	-	-	1.1392	1.1592	0.01914	0.02546	5.5822	6.2376	5.6975	6.3524	6.4454	5.3807	5.5262	5.7882	5.292	5.4632
pos_3189	1-Amino-2-methylanthraquinone	metab_2418	yes	C19320	pos	82-28-0	255.113	5.5471	M+NH4	C15H11NO2	0	40.3	HMDB0243816	-	-	-	-	-	Benzenoids	Anthracenes	Anthraquinones	0	40.3	-	-	1.0181	1.0255	0.002726	0.005843	3.8815	4.2104	4.0268	4.188	4.2571	4.5083	4.4466	4.4017	4.3528	4.4385
neg_3065	H-Asp-ala-his-lys-OH	metab_10043	yes	-	neg	-	468.22	5.89217	M-H	C19H31N7O7	0	36.5	HMDB0253006	-	-	-	-	-	Benzenoids	Phenol ethers	Anisoles	0	36.5	-	-	1.2392	1.2296	3.549e-05	9.314e-05	5.95	5.9015	5.8399	5.8323	5.8262	5.2569	5.2408	5.3705	5.5631	5.2891
neg_1977	CGP71422	metab_8840	yes	-	neg	-	490.234	4.037	M-H2O-H	C29H31N7O2	0	60.9	HMDB0013864	-	-	-	-	-	Benzenoids	Benzene and substituted derivatives	Anilides	0	60.9	-	-	1.6934	1.7032	7.191e-05	0.000167	3.7484	4.2244	3.5979	4.1346	4.2257	5.0129	5.1049	4.876	5.0965	4.976
pos_2997	11-Ketotestosterone	metab_2204	yes	C14256	pos	-	366.202	4.96173	M+ACN+Na	C19H26O3	0	31.9	HMDB0244364;LMST02020120	-	-	-	-	-	Lipids and lipid-like molecules	Steroids and steroid derivatives	Androstane steroids	0	31.9	-	-	1.0841	1.0774	9.398e-05	0.0003721	5.4451	5.4335	5.3365	5.2596	5.2864	5.0869	4.9748	4.9827	5.0719	5.0548
pos_4411	Methyltestosterone	metab_3758	yes	C07198	pos	58-18-4	335.256	6.79055	M+CH3OH+H	C20H30O2	0	33.8	HMDB0015655;HMDB0259471	-	-	-	-	-	Lipids and lipid-like molecules	Steroids and steroid derivatives	Androstane steroids	0	33.8	-	-	1.2647	1.2533	0.0002165	0.000715	5.239	5.2978	5.2436	5.0781	5.1767	4.9654	4.6969	4.6258	4.8107	4.7458
pos_4779	Androst-5-ene-3beta,17beta-diol	metab_4161	yes	C04295	pos	521-17-5	255.211	6.25773	M+H-2H2O	C19H30O2	0	51	HMDB0003818;HMDB0244754	Steroids	19-Carbon atoms	map00140;map04913	Metabolism;Organismal Systems	Lipid metabolism;Endocrine system	Lipids and lipid-like molecules	Steroids and steroid derivatives	Androstane steroids	0	51	Steroid hormone biosynthesis;Ovarian steroidogenesis	Steroid hormone biosynthesis;Ovarian steroidogenesis	1.009	0.9978	1.182e-05	7.419e-05	5.6496	5.6874	5.609	5.6659	5.6385	5.3463	5.4225	5.3695	5.4599	5.3294
pos_4868	4-Androstenediol	metab_4259	yes	C14210	pos	1156-92-9	313.216	6.17085	M+Na	C19H30O2	0	86	LMST02020105;HMDB0005849	Steroids	19-Carbon atoms	-	-	-	Lipids and lipid-like molecules	Steroids and steroid derivatives	Androstane steroids	0	86	-	-	1.3446	1.3308	6.127e-08	4.275e-06	5.8239	5.8098	5.7358	5.7693	5.7831	5.3192	5.3508	5.2926	5.3872	5.2905
pos_5316	19-Hydroxyandrost-4-ene-3,17-dione	metab_4753	yes	C05290	pos	510-64-5	347.16	5.6435	M+2Na-H	C19H26O3	0	33.8	PW_C002016;HMDB0003955;LMST02020067	-	-	map01100;map00140	Metabolism;Metabolism	Global and overview maps;Lipid metabolism	Lipids and lipid-like molecules	Steroids and steroid derivatives	Androstane steroids	0	33.8	Metabolic pathways;Steroid hormone biosynthesis	Metabolic pathways;Steroid hormone biosynthesis	1.5689	1.5463	0.0002534	0.0008114	4.539	4.6532	4.6952	5.0831	4.4773	5.3234	5.4138	5.3095	5.3927	5.3575
neg_4734	11beta,17beta-Dihydroxy-4-androsten-3-one	metab_11889	yes	C18075	neg	1816-85-9	349.202	6.0213	M+FA-H	C19H28O3	0	82.3	HMDB0060339	-	-	map00140	Metabolism	Lipid metabolism	Lipids and lipid-like molecules	Steroids and steroid derivatives	Androstane steroids	0	82.3	Steroid hormone biosynthesis	Steroid hormone biosynthesis	1.0032	0.9924	0.0001888	0.000377	5.4603	5.2915	5.283	5.2491	5.5104	4.9763	4.9914	5.0103	5.0565	4.9861
neg_6497	Fluticasone 17beta-carboxylic acid	metab_13839	yes	-	neg	-	837.349	3.75317	2M+FA-H	C21H26F2O5	0	58.5	HMDB0061092	-	-	-	-	-	Lipids and lipid-like molecules	Steroids and steroid derivatives	Androstane steroids	0	58.5	-	-	1.0853	1.0787	2.611e-05	7.288e-05	5.9914	5.9469	5.985	6.1606	6.1219	5.6864	5.6597	5.6126	5.6621	5.5694
pos_1606	L-Prolinamide	metab_674	yes	C19781	pos	7531-52-4	115.087	0.906667	M+H, M+NH4	C5H10N2O	96.1	0	HMDB0253910	-	-	-	-	-	Organic acids and derivatives	Carboxylic acids and derivatives	Amino acids, peptides, and analogues	96.1	0	-	-	1.5053	1.4878	2.054e-07	8.953e-06	5.3852	5.2807	5.4088	5.3045	5.4125	4.8165	4.8091	4.7785	4.8208	4.7025
pos_1813	Prolyl-Arginine	metab_902	yes	-	pos	-	272.171	0.953583	M+H	C11H21N5O3	0	66	HMDB0029011	-	-	-	-	-	Organic acids and derivatives	Carboxylic acids and derivatives	Amino acids, peptides, and analogues	0	66	-	-	1.0858	1.0849	0.0003674	0.0011	5.6255	5.5655	5.5587	5.3823	5.3837	5.0943	5.2063	5.1228	5.2057	5.2215
pos_1850	5-Amino-2-[(2-amino-3-carboxypropanoyl)oxyamino]pentanoic acid	metab_942	yes	-	pos	-	305.145	1.20687	M+ACN+H	C9H17N3O6	0	66.8	HMDB0260425	-	-	-	-	-	Organic acids and derivatives	Carboxylic acids and derivatives	Amino acids, peptides, and analogues	0	66.8	-	-	1.2237	1.2126	1.549e-07	7.351e-06	6.0937	6.0054	6.0567	6.0549	6.0286	5.6601	5.6152	5.6687	5.7218	5.6725
pos_1876	Methionine sulfoxide	metab_969	yes	C02989	pos	62697-73-8;3226-65-1	148.043	1.39013	M+H-H2O	C5H11NO3S	0	42.1	HMDB0002005;PW_C001342	-	-	map00270	Metabolism	Amino acid metabolism	Organic acids and derivatives	Carboxylic acids and derivatives	Amino acids, peptides, and analogues	0	42.1	Cysteine and methionine metabolism	Cysteine and methionine metabolism	2.3175	2.2853	8.587e-06	5.808e-05	6.001	6.2747	6.1317	6.0853	6.3484	4.9434	4.9453	4.8006	4.9348	4.3055
pos_1895	3''-deamino-3''-oxonicotianamine	metab_990	yes	C15486	pos	-	319.14	1.62155	M+NH4	C12H17N2O7-	0	54.5	HMDB0304096	-	-	-	-	-	Organic acids and derivatives	Carboxylic acids and derivatives	Amino acids, peptides, and analogues	0	54.5	-	-	1.781	1.7637	8.515e-08	5.048e-06	6.2257	6.0949	6.1363	6.0556	6.1127	5.2773	5.2454	5.3254	5.4439	5.3189
pos_1916	Histidinyl-Leucine	metab_1014	yes	C05010	pos	7763-65-7	269.161	1.74957	M+H	C12H20N4O3	0	46.2	HMDB0028889;HMDB0253179	-	-	-	-	-	Organic acids and derivatives	Carboxylic acids and derivatives	Amino acids, peptides, and analogues	0	46.2	-	-	1.1541	1.1466	2.908e-05	0.0001505	7.3624	7.2789	7.2732	7.1777	7.1911	6.8759	6.8476	6.9324	6.9863	6.8769
pos_2014	D-Ornithine	metab_1124	yes	C00515	pos	348-66-3	174.124	2.57222	M+ACN+H	C5H12N2O2	0	36.4	HMDB0003374;PW_C001864	-	-	map01100;map00997;map01110	Metabolism;Metabolism;Metabolism	Global and overview maps;Biosynthesis of other secondary metabolites;Global and overview maps	Organic acids and derivatives	Carboxylic acids and derivatives	Amino acids, peptides, and analogues	0	36.4	Metabolic pathways;Biosynthesis of various secondary metabolites - part 3;Biosynthesis of secondary metabolites	Metabolic pathways;Biosynthesis of various secondary metabolites - part 3;Biosynthesis of secondary metabolites	2.6956	2.6664	5.373e-06	4.363e-05	3.0946	3.1793	3.9268	3.9002	3.4625	5.353	5.416	5.4007	5.3135	5.4564
pos_2021	Lysyltyrosine	metab_1132	yes	-	pos	35978-98-4	310.176	2.58815	M+H	C15H23N3O4	0	34.8	HMDB0028963	-	-	-	-	-	Organic acids and derivatives	Carboxylic acids and derivatives	Amino acids, peptides, and analogues	0	34.8	-	-	1.6881	1.6687	5.284e-05	0.0002369	4.6373	4.3811	4.7584	4.3537	4.2683	5.2467	5.2186	5.2286	5.1473	5.2916
pos_2024	Isoputreanine	metab_1135	yes	-	pos	66165-33-1	343.234	2.60413	2M+Na	C7H16N2O2	0	30.9	HMDB0006009	-	-	-	-	-	Organic acids and derivatives	Carboxylic acids and derivatives	Amino acids, peptides, and analogues	0	30.9	-	-	1.0788	1.073	1.382e-07	6.901e-06	5.596	5.571	5.6314	5.5834	5.5967	5.3165	5.303	5.3388	5.2555	5.2873
pos_2029	Phenylalanyllysine	metab_1140	yes	-	pos	6456-72-0	294.181	2.61212	M+H	C15H23N3O3	0	70.5	HMDB0029000	-	-	-	-	-	Organic acids and derivatives	Carboxylic acids and derivatives	Amino acids, peptides, and analogues	0	70.5	-	-	1.5619	1.5478	6.06e-05	0.0002645	4.5905	4.7239	4.3628	4.6235	4.6151	5.3781	5.2068	5.1614	5.0606	5.3657
pos_2044	5-Hydroxylysine	metab_1157	yes	C16741	pos	1190-94-9	347.192	2.65998	2M+Na	C6H14N2O3	0	47.4	HMDB0245508;HMDB0000450	-	-	map01100;map00310	Metabolism;Metabolism	Global and overview maps;Amino acid metabolism	Organic acids and derivatives	Carboxylic acids and derivatives	Amino acids, peptides, and analogues	0	47.4	Metabolic pathways;Lysine degradation	Metabolic pathways;Lysine degradation	1.0728	1.0666	4.186e-05	0.0001976	6.1762	6.0416	6.1017	5.9785	6.0374	5.7338	5.7146	5.7631	5.8204	5.7711
pos_2160	Isoleucyl-Glutamine	metab_1284	yes	-	pos	-	242.15	2.88977	M+H-H2O	C11H21N3O4	0	40.5	HMDB0028905	-	-	-	-	-	Organic acids and derivatives	Carboxylic acids and derivatives	Amino acids, peptides, and analogues	0	40.5	-	-	1.033	1.0304	0.0006004	0.001633	5.7906	5.7517	5.7399	5.5593	5.629	5.3449	5.2956	5.4003	5.5029	5.413
pos_2208	S-(N,N-Diethylcarbamoyl)glutathione	metab_1336	yes	-	pos	-	448.183	2.96935	M+ACN+H	C15H26N4O7S	0	67.9	HMDB0257384	-	-	-	-	-	Organic acids and derivatives	Carboxylic acids and derivatives	Amino acids, peptides, and analogues	0	67.9	-	-	1.6045	1.587	1.005e-05	6.54e-05	5.6958	5.4593	5.5965	5.5511	5.6222	4.8942	4.8108	4.9122	5.1296	4.8439
pos_2300	Epsilon-(gamma-Glutamyl)lysine	metab_1438	yes	-	pos	17105-15-6	317.182	3.16105	M+ACN+H	C11H21N3O5	0	37.5	HMDB0003869	-	-	-	-	-	Organic acids and derivatives	Carboxylic acids and derivatives	Amino acids, peptides, and analogues	0	37.5	-	-	1.0498	1.0363	2.454e-06	4.183e-05	5.5802	5.5827	5.5672	5.5838	5.614	5.3112	5.2833	5.2475	5.3843	5.2932
pos_2337	Gamma-Glutamylvaline	metab_1478	yes	-	pos	2746-34-1	229.119	3.23338	M+H-H2O	C10H18N2O5	0	50.4	HMDB0011172	-	-	-	-	-	Organic acids and derivatives	Carboxylic acids and derivatives	Amino acids, peptides, and analogues	0	50.4	-	-	1.2775	1.2609	6.555e-06	4.678e-05	5.0492	5.1827	5.1223	5.1678	4.9782	5.5364	5.4762	5.5042	5.5509	5.5303
pos_2347	Glucitol-lysine	metab_1489	yes	-	pos	-	275.16	3.25738	M+H-2H2O	C12H26N2O7	0	55.3	HMDB0252764	-	-	-	-	-	Organic acids and derivatives	Carboxylic acids and derivatives	Amino acids, peptides, and analogues	0	55.3	-	-	2.6515	2.6246	1.423e-05	8.605e-05	5.9748	5.5476	5.8616	5.5439	5.8831	3.7515	3.6689	3.6626	4.5887	3.9804
pos_2473	Beta-Hydroxy-gamma-trimethylaminobutyric acid	metab_1628	yes	-	pos	-	386.228	3.5606	2M+ACN+Na	C7H15NO3	0	64.1	HMDB0244982	-	-	-	-	-	Organic acids and derivatives	Carboxylic acids and derivatives	Amino acids, peptides, and analogues	0	64.1	-	-	1.1194	1.118	0.02279	0.03642	3.1968	3.8155	3.8737	4.0762	3.6213	4.0789	4.255	4.2225	4.2549	3.9934
pos_2652	Medicanine	metab_1825	yes	-	pos	91106-30-8	360.212	3.97932	2M+ACN+H	C7H13NO3	0	41.1	HMDB0038625	-	-	-	-	-	Organic acids and derivatives	Carboxylic acids and derivatives	Amino acids, peptides, and analogues	0	41.1	-	-	1.182	1.1707	7.501e-06	5.21e-05	5.585	5.5538	5.5901	5.5733	5.5527	5.1578	5.1798	5.1641	5.3452	5.1949
pos_2704	Phenylacetylglycine	metab_1882	yes	C05598	pos	500-98-1	194.081	4.10862	M+H	C10H11NO3	78.3	0	HMDB0000821;MJDBOTE0000576	-	-	map00360	Metabolism	Amino acid metabolism	Organic acids and derivatives	Carboxylic acids and derivatives	Amino acids, peptides, and analogues	78.3	0	Phenylalanine metabolism	Phenylalanine metabolism	1.0731	1.0675	1.07e-05	6.863e-05	4.7833	4.7909	4.8593	4.8828	4.9415	5.1585	5.1753	5.1581	5.116	5.1634
pos_2743	Dynorphin B (6-9)	metab_1925	yes	-	pos	-	619.349	4.21332	2M+3H2O+2H	C26H43N11O6	0	61.7	HMDB0012937	-	-	-	-	-	Organic acids and derivatives	Carboxylic acids and derivatives	Amino acids, peptides, and analogues	0	61.7	-	-	1.0789	1.0855	0.004542	0.009123	5.313	5.594	5.3182	5.7233	5.6898	5.8989	5.8026	5.8953	5.884	5.9918
pos_2757	Diphenhydramine N-glucuronide	metab_1940	yes	-	pos	-	474.238	4.26132	M+ACN+H	C23H30NO7+	0	44.4	HMDB0060897	-	-	-	-	-	Organic acids and derivatives	Carboxylic acids and derivatives	Amino acids, peptides, and analogues	0	44.4	-	-	1.4611	1.4484	4.629e-06	4.363e-05	5.6303	5.5167	5.5866	5.4941	5.5085	4.9812	4.9446	4.9469	5.1674	4.937
pos_2777	Gamma-Glutamylisoleucine	metab_1962	yes	-	pos	23632-83-9	243.134	4.31002	M+H-H2O	C11H20N2O5	0	51.5	HMDB0011170	-	-	-	-	-	Organic acids and derivatives	Carboxylic acids and derivatives	Amino acids, peptides, and analogues	0	51.5	-	-	1.0257	1.0133	8.672e-05	0.000352	5.447	5.5996	5.514	5.6403	5.4589	5.8061	5.8243	5.8276	5.8075	5.7975
pos_2869	Gamma-Glutamylglutamic acid	metab_2062	yes	C05282	pos	1116-22-9	299.085	4.55975	M+Na	C10H16N2O7	0	42.4	HMDB0011737	-	-	-	-	-	Organic acids and derivatives	Carboxylic acids and derivatives	Amino acids, peptides, and analogues	0	42.4	-	-	1.7949	1.7755	0.0003248	0.001001	4.4481	4.1197	4.3017	4.2376	4.376	3.5925	3.6535	3.0539	3.654	3.1061
pos_2900	N-Acetylleucine	metab_2098	yes	C02710	pos	1188-21-2	174.112	4.66372	M+H	C8H15NO3	69	0	HMDB0011756	-	-	-	-	-	Organic acids and derivatives	Carboxylic acids and derivatives	Amino acids, peptides, and analogues	69	0	-	-	1.2471	1.2375	8.229e-07	2.072e-05	5.1883	5.0387	5.1504	5.0781	5.0762	4.7141	4.7375	4.7128	4.701	4.6723
pos_2976	L-Proline, 1-(2-methyl-3-(methylthio)-1-oxopropyl)-, (S)-	metab_2181	yes	-	pos	-	232.1	4.89708	M+H	C10H17NO3S	0	41.2	HMDB0257407	-	-	-	-	-	Organic acids and derivatives	Carboxylic acids and derivatives	Amino acids, peptides, and analogues	0	41.2	-	-	1.2412	1.2342	1.359e-05	8.284e-05	3.8949	3.987	4.1122	3.9596	3.9961	4.4571	4.4094	4.3262	4.4233	4.3472
pos_3065	Gly-Pro-Arg-Pro-Lys	metab_2281	yes	-	pos	-	617.351	5.16975	M+ACN+Na	C24H43N9O6	0	49.5	HMDB0252830	-	-	-	-	-	Organic acids and derivatives	Carboxylic acids and derivatives	Amino acids, peptides, and analogues	0	49.5	-	-	1.0572	1.0788	0.005115	0.01007	5.4673	5.0705	5.3373	5.1543	5.199	4.8773	4.776	4.8717	5.1191	4.8419
pos_3093	Melagatran	metab_2312	yes	C21551	pos	159776-70-2	394.222	5.25775	M+H-2H2O	C22H31N5O4	0	48.2	HMDB0254416	-	-	-	-	-	Organic acids and derivatives	Carboxylic acids and derivatives	Amino acids, peptides, and analogues	0	48.2	-	-	2.4658	2.4517	0.000998	0.002504	3.9781	3.8747	4.014	3.2542	3.5116	1.66	1.6502	3.2321	1.6907	1.6542
pos_3188	Cyclo(L-Phe-L-Pro)	metab_2417	yes	C11847	pos	3705-26-8	227.118	5.5471	M+H-H2O	C14H16N2O2	0	43	HMDB0250631	-	-	-	-	-	Organic acids and derivatives	Carboxylic acids and derivatives	Amino acids, peptides, and analogues	0	43	-	-	1.1441	1.1389	6.528e-05	0.0002816	3.8754	4.0092	3.9655	4.0653	4.0913	4.4018	4.3898	4.3172	4.2666	4.3917
pos_3408	N-Lauroyl Histidine	metab_2658	yes	-	pos	-	382.204	6.07533	M+2Na-H	C18H31N3O3	0	56.4	HMDB0242033	-	-	-	-	-	Organic acids and derivatives	Carboxylic acids and derivatives	Amino acids, peptides, and analogues	0	56.4	-	-	1.0436	1.0362	7.946e-08	4.809e-06	5.6243	5.6039	5.6176	5.6648	5.6297	5.9147	5.9408	5.8859	5.9001	5.8787
pos_36	Xemilofiban	metab_2864	yes	-	pos	-	381.152	5.796	M+NH4, M+Na, M+H-2H2O, M+H	C18H22N4O4	0	32.1	HMDB0259927	-	-	-	-	-	Organic acids and derivatives	Carboxylic acids and derivatives	Amino acids, peptides, and analogues	0	32.1	-	-	2.6665	2.6453	3.538e-07	1.217e-05	5.0554	5.1196	5.0946	5.1665	5.2299	3.1852	3.2086	3.7826	3.2966	3.1792
pos_3757	Tresperimus	metab_3035	yes	-	pos	-	352.282	7.25923	M+H-2H2O	C17H37N7O3	0	50.8	HMDB0259122	-	-	-	-	-	Organic acids and derivatives	Carboxylic acids and derivatives	Amino acids, peptides, and analogues	0	50.8	-	-	1.1847	1.1762	0.001628	0.003775	5.1289	5.2385	5.1903	5.1488	5.2307	5.0521	4.6274	4.9008	4.6222	4.6973
pos_423	Enkephalin L	metab_3557	yes	-	pos	14-18-6	556.273	2.72415	M+2H, M+H	C28H37N5O7	0	32.9	HMDB0001045	-	-	-	-	-	Organic acids and derivatives	Carboxylic acids and derivatives	Amino acids, peptides, and analogues	0	32.9	-	-	1.2921	1.2825	4.638e-05	0.0002127	5.8372	5.8246	5.8176	5.7286	5.7452	5.3177	5.2615	5.2555	5.5367	5.3613
pos_46	D-Citrulline	metab_3965	yes	-	pos	-	198.085	0.875	M+H-H2O, M+K, M+2Na-H, M+Na	C6H13N3O3	0	52.7	HMDB0250742	-	-	-	-	-	Organic acids and derivatives	Carboxylic acids and derivatives	Amino acids, peptides, and analogues	0	52.7	-	-	1.2038	1.1958	1.48e-07	7.211e-06	7.4097	7.4883	7.4569	7.5092	7.4653	7.1382	7.1002	7.0567	7.1142	7.0852
pos_4772	N-Myristoyl Arginine	metab_4154	yes	-	pos	-	423.274	6.26568	M+K	C20H40N4O3	0	43.7	HMDB0242046	-	-	-	-	-	Organic acids and derivatives	Carboxylic acids and derivatives	Amino acids, peptides, and analogues	0	43.7	-	-	1.5708	1.5755	4.629e-05	0.0002125	5.2782	5.2581	5.3008	5.1169	5.3452	4.5227	4.6663	4.7151	4.3549	4.7542
pos_4825	Spergualin	metab_4212	yes	C16747	pos	80902-43-8	386.29	6.21863	M+H-H2O	C17H37N7O4	0	49	HMDB0258417	-	-	-	-	-	Organic acids and derivatives	Carboxylic acids and derivatives	Amino acids, peptides, and analogues	0	49	-	-	1.4228	1.4228	2.873e-07	1.116e-05	5.6408	5.6541	5.6582	5.6931	5.6868	5.1599	5.1629	5.2144	5.0316	5.1882
pos_5001	Dermorphin	metab_4409	yes	C20030	pos	77614-16-5	767.35	6.05937	M+H-2H2O	C40H50N8O10	0	37	HMDB0251025	-	-	-	-	-	Organic acids and derivatives	Carboxylic acids and derivatives	Amino acids, peptides, and analogues	0	37	-	-	2.2465	2.232	0.0002236	0.000733	5.8714	6.1508	6.0967	6.0244	6.2273	5.5024	4.6146	4.539	4.2897	4.5459
pos_5007	4-Methoxyestrone	metab_4415	yes	C03958	pos	-	345.144	6.05937	M+2Na-H	C19H24O3	0	35	HMDB0060088	Hormones and transmitters	Peptide hormones	-	-	-	Organic acids and derivatives	Carboxylic acids and derivatives	Amino acids, peptides, and analogues	0	35	-	-	1.6997	1.6786	0.001481	0.003478	4.664	4.5443	4.6172	4.8451	4.6496	4.1275	4.0907	3.4081	4.0963	3.4184
pos_5216	Grazoprevir	metab_4643	yes	-	pos	-	767.35	5.83597	M+H	C38H50N6O9S	0	36.7	HMDB0252939	-	-	-	-	-	Organic acids and derivatives	Carboxylic acids and derivatives	Amino acids, peptides, and analogues	0	36.7	-	-	1.5881	1.5707	6.862e-05	0.0002932	6.2156	5.9466	6.1752	6.1779	5.781	6.7821	6.6536	6.6652	6.7495	6.7629
pos_5377	N2-Fructopyranosylarginine	metab_4820	yes	-	pos	162966-07-6	354.201	5.49047	M+NH4	C12H24N4O7	0	34.3	HMDB0041541	-	-	-	-	-	Organic acids and derivatives	Carboxylic acids and derivatives	Amino acids, peptides, and analogues	0	34.3	-	-	1.2627	1.2492	0.002441	0.00533	3.9669	4.0634	3.7184	3.7625	4.0822	3.3606	3.7548	3.3442	3.3919	3.3916
pos_5389	Arginylphenylalaninamide	metab_4833	yes	-	pos	-	303.191	5.46647	M+H-H2O	C15H24N6O2	0	40.4	HMDB0257190	-	-	-	-	-	Organic acids and derivatives	Carboxylic acids and derivatives	Amino acids, peptides, and analogues	0	40.4	-	-	1.3405	1.3358	8.221e-05	0.0003386	5.3191	5.009	5.2006	5.0486	5.067	4.6469	4.6009	4.5922	4.7704	4.6139
pos_5524	(2-Mercaptomethyl-3-phenyl-propionyl)-glycine	metab_4981	yes	C01619	pos	-	295.111	5.20177	M+ACN+H	C12H15NO3S	0	35	HMDB0242473	-	-	-	-	-	Organic acids and derivatives	Carboxylic acids and derivatives	Amino acids, peptides, and analogues	0	35	-	-	1.1223	1.1127	0.0001449	0.0005233	5.2034	5.058	5.201	5.1118	5.1445	4.799	4.8338	4.7963	4.9265	4.6644
pos_5529	Phenylalanylvaline	metab_4986	yes	-	pos	3918-90-9	297.181	5.19377	M+CH3OH+H	C14H20N2O3	0	46.4	HMDB0029008	-	-	-	-	-	Organic acids and derivatives	Carboxylic acids and derivatives	Amino acids, peptides, and analogues	0	46.4	-	-	1.0109	1.0105	0.002141	0.004777	3.9111	4.1284	4.1602	4.2768	4.246	4.5102	4.4952	4.429	4.4612	4.3671
pos_5542	N-Arachidonoylglycine	metab_5001	yes	-	pos	179113-91-8	425.276	5.16177	M+ACN+Na	C22H35NO3	0	40	LMFA08020003;HMDB0005096	-	-	-	-	-	Organic acids and derivatives	Carboxylic acids and derivatives	Amino acids, peptides, and analogues	0	40	-	-	1.4715	1.4725	1.058e-05	6.815e-05	3.4214	3.2356	3.2448	3.2644	3.2616	3.9657	3.6834	3.831	3.8885	3.8811
pos_5679	N-lactoyl-phenylalanine	metab_5150	yes	-	pos	183241-73-8	238.107	4.88107	M+H	C12H15NO4	80	0	HMDB0062175	-	-	-	-	-	Organic acids and derivatives	Carboxylic acids and derivatives	Amino acids, peptides, and analogues	80	0	-	-	1.7771	1.7635	2.59e-06	4.315e-05	4.9673	4.6606	4.9834	4.9224	4.9814	4.0634	4.1405	4.0104	4.0468	4.1863
pos_5684	N-Docosahexaenoyl Glutamine	metab_5156	yes	-	pos	-	439.291	4.87307	M+H-H2O	C27H40N2O4	0	34.4	HMDB0242012;LMFA08020129	-	-	-	-	-	Organic acids and derivatives	Carboxylic acids and derivatives	Amino acids, peptides, and analogues	0	34.4	-	-	1.3045	1.2883	2.921e-06	4.363e-05	6.0382	6.1175	5.9977	6.0466	6.1731	5.6175	5.6553	5.5741	5.6995	5.655
pos_5898	postin	metab_5392	yes	-	pos	103745-46-6	560.329	4.42252	M+ACN+Na	C22H40N8O5	0	30.4	HMDB0005772	-	-	-	-	-	Organic acids and derivatives	Carboxylic acids and derivatives	Amino acids, peptides, and analogues	0	30.4	-	-	1.9544	1.9348	5.138e-05	0.0002321	5.3481	5.3381	5.1663	5.1109	5.0757	4.4049	4.1508	4.1121	4.4805	3.8265
pos_5926	Gamma-L-Glutamyl-gamma-L-glutamyl-L-methionine	metab_5424	yes	-	pos	41515-84-8	449.17	4.3746	M+ACN+H	C15H25N3O8S	0	73	HMDB0038674	-	-	-	-	-	Organic acids and derivatives	Carboxylic acids and derivatives	Amino acids, peptides, and analogues	0	73	-	-	1.2092	1.1987	0.0001082	0.0004151	4.8485	5.1284	4.9217	5.071	4.9614	5.4414	5.4301	5.3177	5.3439	5.3692
pos_5950	Fructosyl-lysine	metab_5451	yes	C16488	pos	21291-40-7	347.124	4.33402	M+K	C12H24N2O7	0	53.1	HMDB0252495;HMDB0242138;HMDB0034879	-	-	map02060	Environmental Information Processing	Membrane transport	Organic acids and derivatives	Carboxylic acids and derivatives	Amino acids, peptides, and analogues	0	53.1	Phosphotransferase system (PTS)	Phosphotransferase system (PTS)	1.0267	1.0138	0.000424	0.00123	4.8406	4.8326	4.9002	5.008	4.8455	5.076	5.3119	5.1908	5.1568	5.1505
pos_5959	Imidazolone A	metab_5460	yes	-	pos	-	654.346	4.31002	2M+NH4	C12H22N4O6	0	48.8	HMDB0253421	-	-	-	-	-	Organic acids and derivatives	Carboxylic acids and derivatives	Amino acids, peptides, and analogues	0	48.8	-	-	1.9364	1.9047	0.0001267	0.0004707	3.9036	4.2804	4.4998	4.4196	3.8649	5.1586	5.0356	5.106	5.287	5.3808
pos_5962	N-Acetyl-L-tyrosine	metab_5464	yes	C01657	pos	537-55-3	256.118	4.31002	M+CH3OH+H	C11H13NO4	0	50.8	HMDB0000866;HMDB0244966	-	-	-	-	-	Organic acids and derivatives	Carboxylic acids and derivatives	Amino acids, peptides, and analogues	0	50.8	-	-	1.1117	1.112	0.03852	0.0568	2.8862	2.8649	3.7286	3.4224	3.7252	3.8449	3.863	3.7458	3.7379	3.8311
pos_5986	3-Pyroglutamylthiazolidine-4-carboxylic acid	metab_5490	yes	-	pos	-	209.038	4.26998	M+H-2H2O	C9H12N2O4S	0	67.6	HMDB0256379	-	-	-	-	-	Organic acids and derivatives	Carboxylic acids and derivatives	Amino acids, peptides, and analogues	0	67.6	-	-	1.208	1.1964	1.038e-05	6.705e-05	4.5141	4.469	4.6119	4.6814	4.5422	4.958	4.9753	4.9341	4.9359	4.9127
pos_6048	Cyclosquamosin D	metab_5560	yes	-	pos	-	801.399	4.13265	M+H-2H2O	C41H56N8O11	0	91.9	HMDB0303369	-	-	-	-	-	Organic acids and derivatives	Carboxylic acids and derivatives	Amino acids, peptides, and analogues	0	91.9	-	-	1.5615	1.5494	2.9e-05	0.0001502	5.9523	5.8695	5.763	5.6749	5.7195	5.1484	5.0275	5.0932	5.3633	5.1287
pos_6181	Phenylalanylaspartic acid	metab_5708	yes	-	pos	22828-05-3	263.103	3.9393	M+H-H2O	C13H16N2O5	0	41.7	HMDB0028991	-	-	-	-	-	Organic acids and derivatives	Carboxylic acids and derivatives	Amino acids, peptides, and analogues	0	41.7	-	-	1.02	1.0132	8.56e-05	0.0003489	4.6391	4.7513	4.7058	4.832	4.7518	5.0617	5.0711	4.9866	4.9575	5.003
pos_6188	Ile-Ile-Ile-Pro	metab_5715	yes	-	pos	-	493.281	3.91463	M+K	C23H42N4O5	0	45.5	HMDB0304800	-	-	-	-	-	Organic acids and derivatives	Carboxylic acids and derivatives	Amino acids, peptides, and analogues	0	45.5	-	-	1.1299	1.1206	3.2e-05	0.0001607	6.5392	6.7276	6.6	6.7354	6.6535	7.0026	7.0315	6.9428	6.9695	6.9978
pos_6338	Prolyl-Threonine	metab_5882	yes	-	pos	-	474.256	3.66497	2M+ACN+H	C9H16N2O4	0	50.7	HMDB0029027	-	-	-	-	-	Organic acids and derivatives	Carboxylic acids and derivatives	Amino acids, peptides, and analogues	0	50.7	-	-	1.2237	1.2152	2.763e-05	0.0001447	5.872	5.9502	5.7648	5.8075	5.7415	5.4135	5.4244	5.357	5.5244	5.4337
pos_636	S-Prenyl-L-cysteine	metab_5906	yes	C06751	pos	5287-46-7	190.09	4.02797	M+H, M+ACN+H	C8H15NO2S	0	50.1	HMDB0012286	-	-	-	-	-	Organic acids and derivatives	Carboxylic acids and derivatives	Amino acids, peptides, and analogues	0	50.1	-	-	1.3486	1.3422	8.981e-06	6.012e-05	4.627	4.8001	4.6903	4.7509	4.8029	4.2493	4.1679	4.2447	4.2786	4.3748
pos_6592	Hydroxyprolyl-Proline	metab_6162	yes	-	pos	-	474.256	3.29703	2M+NH4	C10H16N2O4	0	47.5	HMDB0028871	-	-	-	-	-	Organic acids and derivatives	Carboxylic acids and derivatives	Amino acids, peptides, and analogues	0	47.5	-	-	1.2324	1.2334	0.002664	0.005732	5.7882	5.6616	5.5763	5.2951	5.5799	5.0723	5.1957	5.0692	5.3501	4.9513
pos_6653	Lysyl-Glycine	metab_6230	yes	-	pos	7563-03-03	429.246	3.20938	2M+Na	C8H17N3O3	0	46.3	HMDB0304784;HMDB0028951	-	-	-	-	-	Organic acids and derivatives	Carboxylic acids and derivatives	Amino acids, peptides, and analogues	0	46.3	-	-	1.7155	1.7004	1.535e-06	3.1e-05	5.2886	5.2279	5.2283	5.1519	5.2543	4.292	4.4277	4.4759	4.5995	4.5808
pos_6679	Hypoglycin B	metab_6257	yes	C08280	pos	502-37-4	253.118	3.17705	M+H-H2O	C12H18N2O5	0	61.4	HMDB0029428	-	-	-	-	-	Organic acids and derivatives	Carboxylic acids and derivatives	Amino acids, peptides, and analogues	0	61.4	-	-	1.2425	1.228	5.229e-06	4.363e-05	6.5822	6.4544	6.5253	6.4882	6.5674	6.1204	6.0904	6.0851	6.238	6.0979
pos_6721	Arphamenine B	metab_6305	yes	-	pos	-	369.213	3.1132	M+CH3OH+H	C16H24N4O4	0	41.3	HMDB0248615	-	-	-	-	-	Organic acids and derivatives	Carboxylic acids and derivatives	Amino acids, peptides, and analogues	0	41.3	-	-	1.0689	1.0593	1.311e-06	2.839e-05	6.1914	6.2882	6.1836	6.2505	6.2351	5.9692	5.9208	5.9253	5.9654	5.9115
pos_6763	(2S)-2-(2-Benzamidoethylamino)-5-(diaminomethylideneamino)pentanoic acid	metab_6350	yes	-	pos	-	304.176	3.06492	M+H-H2O	C15H23N5O3	0	41.4	HMDB0257707	-	-	-	-	-	Organic acids and derivatives	Carboxylic acids and derivatives	Amino acids, peptides, and analogues	0	41.4	-	-	1.2685	1.2536	3.473e-07	1.212e-05	5.7574	5.6979	5.756	5.7113	5.777	5.393	5.2982	5.2839	5.3781	5.3083
pos_6796	Ne,Ne dimethyllysine	metab_6386	yes	C05545	pos	-	157.134	3.02515	M+H-H2O	C8H18N2O2	0	41.5	HMDB0013287	-	-	map01100;map00310	Metabolism;Metabolism	Global and overview maps;Amino acid metabolism	Organic acids and derivatives	Carboxylic acids and derivatives	Amino acids, peptides, and analogues	0	41.5	Metabolic pathways;Lysine degradation	Metabolic pathways;Lysine degradation	1.071	1.0657	0.0009833	0.002473	4.86	4.681	4.7297	4.5545	4.6618	4.2239	4.3519	4.4627	4.4437	4.3533
pos_6826	Cyclo(glycylleucylvalylleucylprolylseryl)	metab_6420	yes	-	pos	-	611.315	2.97735	M+2Na-H	C27H46N6O7	0	66.1	HMDB0303709	-	-	-	-	-	Organic acids and derivatives	Carboxylic acids and derivatives	Amino acids, peptides, and analogues	0	66.1	-	-	1.25	1.2437	5.963e-05	0.0002616	5.7105	5.7609	5.8312	5.9645	5.9656	6.2947	6.2793	6.2064	6.252	6.3029
pos_6863	Leu-Pro-Ile	metab_6460	yes	-	pos	-	359.265	2.92953	M+NH4	C17H31N3O4	0	44.4	HMDB0304805	-	-	-	-	-	Organic acids and derivatives	Carboxylic acids and derivatives	Amino acids, peptides, and analogues	0	44.4	-	-	1.3294	1.321	5.214e-05	0.0002346	6.0075	5.8883	5.8316	5.7333	5.7556	5.3731	5.2969	5.3844	5.4928	5.3114
pos_6870	Isoleucyl-Lysine	metab_6468	yes	-	pos	-	242.186	2.92167	M+H-H2O	C12H25N3O3	0	50.5	HMDB0028912	-	-	-	-	-	Organic acids and derivatives	Carboxylic acids and derivatives	Amino acids, peptides, and analogues	0	50.5	-	-	1.1853	1.1765	0.0001553	0.0005519	5.2628	5.0559	5.2833	5.1748	5.2704	4.8226	4.9228	4.8955	4.7143	4.7861
pos_6912	Proline glutamate	metab_6515	yes	-	pos	-	302.135	2.87382	M+ACN+H	C10H16N2O6	0	51.4	HMDB0256798	-	-	-	-	-	Organic acids and derivatives	Carboxylic acids and derivatives	Amino acids, peptides, and analogues	0	51.4	-	-	1.1055	1.1023	0.0004181	0.001221	6.2689	6.2161	6.1408	5.9847	6.0547	5.8349	5.7273	5.7288	5.8748	5.786
pos_7156	Gamma-Glutamylacetamide	metab_6786	yes	-	pos	-	153.066	2.58815	M+H-2H2O	C7H12N2O4	0	58.7	HMDB0252618	-	-	-	-	-	Organic acids and derivatives	Carboxylic acids and derivatives	Amino acids, peptides, and analogues	0	58.7	-	-	1.0703	1.0631	7.426e-05	0.0003123	4.5572	4.7535	4.5928	4.7297	4.6798	5.0125	4.9902	4.9144	4.9778	4.9601
pos_7172	Phenylalanylarginine	metab_6804	yes	-	pos	1238-09-1	322.187	2.55628	M+H	C15H23N5O3	0	67.4	HMDB0028989	-	-	-	-	-	Organic acids and derivatives	Carboxylic acids and derivatives	Amino acids, peptides, and analogues	0	67.4	-	-	1.3061	1.2966	5.683e-06	4.363e-05	5.5517	5.5874	5.4876	5.4799	5.4034	5.0637	4.9724	5.1033	5.1267	5.0254
pos_7193	L-Proline, 1-acetyl-4-hydroxy-, cis-	metab_6827	yes	-	pos	-	138.055	2.51633	M+H-2H2O	C7H11NO4	0	38.5	HMDB0253913	-	-	-	-	-	Organic acids and derivatives	Carboxylic acids and derivatives	Amino acids, peptides, and analogues	0	38.5	-	-	1.0934	1.0954	0.0003151	0.0009765	4.997	5.1948	5.1029	5.1933	5.2903	4.8118	4.7885	4.8985	4.7903	4.8621
pos_7216	Lysylisoleucine	metab_6851	yes	-	pos	7369-79-1;20556-13-2	130.602	2.3731	M+2H	C12H25N3O3	0	43.7	HMDB0028954;HMDB0028955	-	-	-	-	-	Organic acids and derivatives	Carboxylic acids and derivatives	Amino acids, peptides, and analogues	0	43.7	-	-	1.1104	1.104	0.01308	0.02254	4.2084	4.4133	4.4062	4.2467	4.1933	4.7949	4.644	4.6498	4.3342	5.0537
pos_7263	Glutaminylvaline	metab_6900	yes	-	pos	31189-73-8	228.134	1.84523	M+H-H2O	C10H19N3O4	0	70.4	HMDB0028810	-	-	-	-	-	Organic acids and derivatives	Carboxylic acids and derivatives	Amino acids, peptides, and analogues	0	70.4	-	-	1.0388	1.0345	0.0002709	0.0008573	6.0563	5.9696	5.9439	5.8732	5.8732	5.5673	5.5969	5.6746	5.763	5.6217
pos_7273	Serylmethionine	metab_6911	yes	-	pos	3227-09-06	237.09	1.82128	M+H	C8H16N2O4S	0	64.4	HMDB0029045	-	-	-	-	-	Organic acids and derivatives	Carboxylic acids and derivatives	Amino acids, peptides, and analogues	0	64.4	-	-	1.1149	1.123	0.001746	0.004	5.9293	5.7431	5.8538	5.7075	5.7742	5.4824	5.381	5.4001	5.6706	5.2617
pos_7289	QUISQUALIC ACID	metab_6928	yes	C08296	pos	52809-07-1	154.025	1.77357	M+H-2H2O	C5H7N3O5	0	43.9	HMDB0257060	-	-	-	-	-	Organic acids and derivatives	Carboxylic acids and derivatives	Amino acids, peptides, and analogues	0	43.9	-	-	1.0703	1.0517	0.03143	0.04792	2.9633	3.2365	2.9686	3.3756	3.7958	2.8669	2.8569	2.8505	2.8981	2.8609
pos_7293	Ectoine	metab_6933	yes	C06231	pos	96702-03-3	326.182	1.76557	2M+ACN+H	C6H10N2O2	0	35.9	HMDB0240650;MJDBOTE0001351	-	-	map01100;map01120;map00260	Metabolism;Metabolism;Metabolism	Global and overview maps;Global and overview maps;Amino acid metabolism	Organic acids and derivatives	Carboxylic acids and derivatives	Amino acids, peptides, and analogues	0	35.9	Metabolic pathways;Microbial metabolism in diverse environments;Glycine, serine and threonine metabolism	Metabolic pathways;Microbial metabolism in diverse environments;Glycine, serine and threonine metabolism	1.2009	1.1892	1.466e-06	3.052e-05	6.5754	6.46	6.5447	6.4904	6.519	6.1529	6.127	6.1066	6.2283	6.128
pos_7347	Pglu-his-pro	metab_6993	yes	-	pos	-	381.188	1.49378	M+NH4	C16H21N5O5	0	41.5	HMDB0256375	-	-	-	-	-	Organic acids and derivatives	Carboxylic acids and derivatives	Amino acids, peptides, and analogues	0	41.5	-	-	1.4423	1.4333	0.0002195	0.0007233	5.5066	5.2272	5.532	5.2703	5.4003	4.7074	4.6543	4.8203	5.0269	4.8777
pos_7374	Asparaginylglutamic acid	metab_7023	yes	-	pos	20917-58-2	244.093	1.3264	M+H-H2O	C9H15N3O6	0	71.1	HMDB0028730	-	-	-	-	-	Organic acids and derivatives	Carboxylic acids and derivatives	Amino acids, peptides, and analogues	0	71.1	-	-	1.9926	1.987	1.59e-05	9.343e-05	5.2037	5.2413	4.7048	4.7597	4.9079	5.9978	5.9723	5.9677	6.0895	5.9909
pos_7472	N,N-Dimethylarginine	metab_7128	yes	C03626	pos	30315-93-6	203.15	0.937883	M+H	C8H18N4O2	40.5	0	HMDB0001539	-	-	-	-	-	Organic acids and derivatives	Carboxylic acids and derivatives	Amino acids, peptides, and analogues	40.5	0	-	-	1.2829	1.2706	5.186e-06	4.363e-05	5.477	5.3944	5.4037	5.4269	5.3941	4.8863	5.0463	5.0408	5.0689	4.9249
pos_948	N-Linoleoyl Tyrosine	metab_7637	yes	-	pos	-	444.311	6.67112	M+H, M+Na	C27H41NO4	0	56.1	HMDB0241987	-	-	-	-	-	Organic acids and derivatives	Carboxylic acids and derivatives	Amino acids, peptides, and analogues	0	56.1	-	-	1.0643	1.0448	0.001613	0.003745	6.1033	6.1569	6.1836	6.2557	6.3119	6.0655	5.8878	5.7282	5.926	5.7767
pos_7212	Meso-2,6-Diaminoheptanedioate	metab_7737	yes	C00680	pos	583-93-7	191.103	2.4048	M+H	C7H14N2O4	33.2	0	HMDB0001370	-	-	map01100;map01110;map01230;map00300;map01120	Metabolism;Metabolism;Metabolism;Metabolism;Metabolism	Global and overview maps;Global and overview maps;Global and overview maps;Amino acid metabolism;Global and overview maps	Organic acids and derivatives	Carboxylic acids and derivatives	Amino acids, peptides, and analogues	33.2	0	Metabolic pathways;Biosynthesis of secondary metabolites;Biosynthesis of amino acids;Lysine biosynthesis;Microbial metabolism in diverse environments	Metabolic pathways;Biosynthesis of secondary metabolites;Biosynthesis of amino acids;Lysine biosynthesis;Microbial metabolism in diverse environments	1.5571	1.5385	1.744e-05	0.0001004	4.3793	4.5297	4.589	4.4132	4.5111	3.7773	3.7966	3.9785	4.001	3.7095
pos_3201	Quercetin 3-O-sophoroside	metab_7750	yes	C08549	pos	18609-17-1	326.134	5.587	M+NH4	C14H16N2O6	0	61.1	HMDB0304729	-	-	-	-	-	Organic acids and derivatives	Carboxylic acids and derivatives	Amino acids, peptides, and analogues	0	61.1	-	-	1.6745	1.6792	3.445e-05	0.0001704	3.7912	3.9764	3.9669	3.9183	3.9314	3.0345	3.0246	3.4325	3.0658	3.3123
neg_1027	Citrulline	metab_7788	yes	C00327	neg	372-75-8	174.088	0.914767	M-H	C6H13N3O3	83.7	0	HMDB0000904;PW_C000723;MJDBOTE0000481	Peptides	Amino acids	map01100;map00220;map00997;map01110;map01230	Metabolism;Metabolism;Metabolism;Metabolism;Metabolism	Global and overview maps;Amino acid metabolism;Biosynthesis of other secondary metabolites;Global and overview maps;Global and overview maps	Organic acids and derivatives	Carboxylic acids and derivatives	Amino acids, peptides, and analogues	83.7	0	Metabolic pathways;Arginine biosynthesis;Biosynthesis of various secondary metabolites - part 3;Biosynthesis of secondary metabolites;Biosynthesis of amino acids	Metabolic pathways;Arginine biosynthesis;Biosynthesis of various secondary metabolites - part 3;Biosynthesis of secondary metabolites;Biosynthesis of amino acids	1.2865	1.2815	2.783e-11	8.956e-09	7.1651	7.1969	7.1648	7.1983	7.1495	6.6276	6.6273	6.6304	6.6503	6.6219
neg_1052	L-Phosphoarginine	metab_7816	yes	C05945	neg	1189-11-3	507.15	0.9539	2M-H	C6H15N4O5P	0	31.9	HMDB0029438	-	-	map00330	Metabolism	Amino acid metabolism	Organic acids and derivatives	Carboxylic acids and derivatives	Amino acids, peptides, and analogues	0	31.9	Arginine and proline metabolism	Arginine and proline metabolism	1.945	1.9413	1.489e-07	1.616e-06	6.5924	6.6993	6.6027	6.6732	6.7589	5.507	5.5466	5.4994	5.2567	5.2335
neg_1109	Amoxicilloyl	metab_7879	yes	-	neg	-	362.12	1.24373	M-H2O-H	C17H23N3O5S	0	67.3	HMDB0248351	-	-	-	-	-	Organic acids and derivatives	Carboxylic acids and derivatives	Amino acids, peptides, and analogues	0	67.3	-	-	1.0484	1.0419	2.247e-06	1.053e-05	6.6029	6.5333	6.5622	6.547	6.5323	6.1544	6.1793	6.1409	6.2961	6.163
neg_1165	Histidylisoleucine	metab_7940	yes	-	neg	129050-48-2	267.146	1.71423	M-H	C12H20N4O3	0	46	HMDB0028888	-	-	-	-	-	Organic acids and derivatives	Carboxylic acids and derivatives	Amino acids, peptides, and analogues	0	46	-	-	1.0973	1.0936	1.047e-05	3.531e-05	6.5993	6.5323	6.4819	6.3905	6.416	6.0438	6.0279	6.1084	6.123	6.0596
neg_1219	Glutaminylmethionine	metab_8000	yes	-	neg	114659-59-5	276.102	2.38757	M-H	C10H19N3O4S	0	62.8	HMDB0028803	-	-	-	-	-	Organic acids and derivatives	Carboxylic acids and derivatives	Amino acids, peptides, and analogues	0	62.8	-	-	1.1595	1.1541	4.155e-05	0.0001056	5.9121	5.9269	5.7499	5.666	5.6862	5.3126	5.2977	5.371	5.3485	5.2768
neg_1221	Alanylglutamic acid	metab_8003	yes	-	neg	13187-90-1	199.072	2.40322	M-H2O-H	C8H14N2O5	0	36.5	HMDB0028686	-	-	-	-	-	Organic acids and derivatives	Carboxylic acids and derivatives	Amino acids, peptides, and analogues	0	36.5	-	-	1.0104	1.0069	6.546e-05	0.0001542	5.1889	5.1416	5.1122	5.1679	4.9526	5.3996	5.4545	5.5283	5.4862	5.4705
neg_1229	Threonylmethionine	metab_8011	yes	-	neg	90729-28-5	249.091	2.49723	M-H	C9H18N2O4S	0	48.8	HMDB0029067	-	-	-	-	-	Organic acids and derivatives	Carboxylic acids and derivatives	Amino acids, peptides, and analogues	0	48.8	-	-	1.1096	1.1069	2.801e-05	7.69e-05	5.6466	5.5901	5.5179	5.439	5.4077	5.0493	5.0521	5.1027	5.173	5.0936
neg_1237	Gly-pro-arg-pro	metab_8020	yes	-	neg	-	460.205	2.64608	M+Cl	C18H31N7O5	0	51.8	HMDB0252829	-	-	-	-	-	Organic acids and derivatives	Carboxylic acids and derivatives	Amino acids, peptides, and analogues	0	51.8	-	-	1.0168	1.0093	3.973e-05	0.0001018	7.3454	7.4108	7.2345	7.2136	7.2089	6.8953	6.9187	6.9303	6.9889	6.8957
neg_1308	Histidinyl-Tryptophan	metab_8099	yes	-	neg	23403-90-9	340.141	3.21747	M-H	C17H19N5O3	0	60.7	HMDB0304782;HMDB0028896	-	-	-	-	-	Organic acids and derivatives	Carboxylic acids and derivatives	Amino acids, peptides, and analogues	0	60.7	-	-	1.0836	1.0754	4.37e-05	0.0001102	5.9067	5.9129	5.8412	5.8494	5.778	5.328	5.4448	5.5207	5.5766	5.3935
neg_1367	O-Desmethyl-lacosamide	metab_8164	yes	-	neg	-	281.114	3.2807	M+FA-H	C12H16N2O3	0	44.9	HMDB0060855	-	-	-	-	-	Organic acids and derivatives	Carboxylic acids and derivatives	Amino acids, peptides, and analogues	0	44.9	-	-	1.0213	1.0216	0.0001311	0.0002757	5.1414	4.9136	5.1252	5.0271	4.9805	4.5844	4.6737	4.7174	4.7546	4.5986
neg_137	Prolylglycine	metab_8167	yes	-	neg	2578-57-6	217.083	0.969533	M-H, M+FA-H	C7H12N2O3	0	47.7	HMDB0011178	-	-	-	-	-	Organic acids and derivatives	Carboxylic acids and derivatives	Amino acids, peptides, and analogues	0	47.7	-	-	1.138	1.1357	2.079e-05	6.077e-05	7.0163	6.8934	6.8973	6.784	6.7952	6.4045	6.4051	6.4093	6.5414	6.3965
neg_1370	((4-(4-Amidinophenoxy)butanoyl)aspartyl)valine	metab_8168	yes	-	neg	-	481.194	3.2807	M+FA-H	C20H28N4O7	0	63.5	HMDB0242231	-	-	-	-	-	Organic acids and derivatives	Carboxylic acids and derivatives	Amino acids, peptides, and analogues	0	63.5	-	-	3.03	3.0176	2.774e-12	1.785e-09	5.669	5.7718	5.724	5.8471	5.9085	2.7467	2.7618	2.7807	2.8268	2.7565
neg_1450	Arginyltryptophan	metab_8257	yes	-	neg	25615-38-7	381.163	3.36742	M+Na-2H	C17H24N6O3	0	37	HMDB0028720	-	-	-	-	-	Organic acids and derivatives	Carboxylic acids and derivatives	Amino acids, peptides, and analogues	0	37	-	-	1.2821	1.2765	5.508e-08	1.616e-06	5.8557	5.8115	5.75	5.7517	5.713	5.2476	5.1998	5.2574	5.25	5.2011
neg_1503	Glutaminylleucine	metab_8316	yes	-	neg	34027-65-1	258.146	3.43075	M-H	C11H21N3O4	0	60.7	HMDB0028801	-	-	-	-	-	Organic acids and derivatives	Carboxylic acids and derivatives	Amino acids, peptides, and analogues	0	60.7	-	-	1.0056	1.0044	3.096e-05	8.333e-05	6.6461	6.5286	6.5306	6.4413	6.4586	6.1149	6.1492	6.1798	6.2426	6.1664
neg_1519	L-Hexahydro-3-imino-1,2,4-oxadiazepine-3-carboxylic acid	metab_8333	yes	-	neg	21539-44-6	476.182	3.44643	3M-H	C5H9N3O3	0	63.3	HMDB0030402	-	-	-	-	-	Organic acids and derivatives	Carboxylic acids and derivatives	Amino acids, peptides, and analogues	0	63.3	-	-	1.2309	1.222	1.456e-06	7.611e-06	6.0634	6.1527	5.9505	6.0494	6.0277	5.6073	5.5608	5.5072	5.5656	5.4741
neg_1609	ALA-ILE	metab_8432	yes	-	neg	29727-65-9	201.124	3.55663	M-H	C9H18N2O3	91.3	0	HMDB0028690	-	-	-	-	-	Organic acids and derivatives	Carboxylic acids and derivatives	Amino acids, peptides, and analogues	91.3	0	-	-	1.0706	1.0734	0.0002997	0.0005648	6.9651	6.8024	6.8078	6.6641	6.6813	6.3117	6.3178	6.3954	6.5226	6.3056
neg_1672	Quinapril	metab_8502	yes	C07398	neg	85441-61-8	875.427	3.62713	2M-H	C25H30N2O5	0	59	HMDB0015019;PW_C009334	-	-	-	-	-	Organic acids and derivatives	Carboxylic acids and derivatives	Amino acids, peptides, and analogues	0	59	-	-	1.6212	1.613	3.337e-05	8.861e-05	6.3243	6.1361	6.2306	6.0587	6.0973	5.1256	5.091	5.3404	5.6162	5.157
neg_1762	Panax ginseng Tetrapeptide	metab_8602	yes	-	neg	-	480.22	3.74533	M+Na-2H	C18H33N7O7	0	60.9	HMDB0302146	-	-	-	-	-	Organic acids and derivatives	Carboxylic acids and derivatives	Amino acids, peptides, and analogues	0	60.9	-	-	1.1516	1.1447	1.517e-06	7.875e-06	6.436	6.3583	6.3537	6.3224	6.3228	5.8922	5.8632	5.9007	6.0265	5.8912
neg_1919	D-1-[(3-Carboxypropyl)amino]-1-deoxyfructose	metab_8776	yes	-	neg	10003-63-1	246.098	3.95802	M-H2O-H	C10H19NO7	0	47.9	HMDB0038663	-	-	-	-	-	Organic acids and derivatives	Carboxylic acids and derivatives	Amino acids, peptides, and analogues	0	47.9	-	-	2.2771	2.2871	0.005846	0.008389	0.9932	3.2033	0.9868	3.4909	0.9871	4.0376	4.1023	4.1149	4.0495	4.1494
neg_2063	N-lactoyl-Methionine	metab_8936	yes	-	neg	-	220.065	4.14732	M-H	C8H15NO4S	0	39.8	HMDB0062182	-	-	-	-	-	Organic acids and derivatives	Carboxylic acids and derivatives	Amino acids, peptides, and analogues	0	39.8	-	-	1.2701	1.2649	4.354e-08	1.578e-06	5.9988	5.9559	5.9605	5.9503	5.9271	5.3993	5.4133	5.3515	5.4893	5.4642
neg_2082	H-D-Tyr-val-gly-OH	metab_8957	yes	-	neg	-	318.149	4.17083	M-H2O-H	C16H23N3O5	0	32.5	HMDB0253011	-	-	-	-	-	Organic acids and derivatives	Carboxylic acids and derivatives	Amino acids, peptides, and analogues	0	32.5	-	-	1.0813	1.0833	5.783e-05	0.000139	5.4394	5.2505	5.3911	5.2562	5.2361	4.8746	4.7931	4.8974	4.9665	4.9776
neg_2105	Seryltryptophan	metab_8983	yes	-	neg	94421-70-2	290.115	4.20215	M-H	C14H17N3O4	0	63	HMDB0029050	-	-	-	-	-	Organic acids and derivatives	Carboxylic acids and derivatives	Amino acids, peptides, and analogues	0	63	-	-	1.02	1.0159	1.196e-05	3.909e-05	5.9546	5.8085	5.8982	5.843	5.85	5.4749	5.5188	5.5063	5.6168	5.463
neg_2117	Small bacteriocin	metab_8996	yes	-	neg	172617-17-3	362.175	4.21782	M+K-2H	C18H31NO4	0	35.9	HMDB0033503	-	-	-	-	-	Organic acids and derivatives	Carboxylic acids and derivatives	Amino acids, peptides, and analogues	0	35.9	-	-	1.0837	1.0859	0.000584	0.001026	5.4898	5.4499	5.4028	5.1494	5.2045	4.8596	4.7772	4.9751	5.0011	4.9091
neg_2136	Valyl-prolyl-glycyl-valyl-glycine	metab_9017	yes	-	neg	-	472.241	4.24135	M+FA-H	C19H33N5O6	0	79.3	HMDB0259877	-	-	-	-	-	Organic acids and derivatives	Carboxylic acids and derivatives	Amino acids, peptides, and analogues	0	79.3	-	-	1.2139	1.2067	1.539e-07	1.616e-06	6.2925	6.3079	6.2151	6.2217	6.1917	5.7408	5.7279	5.7332	5.8248	5.7584
neg_214	L-Aspartyl-L-Phenylalanine	metab_9021	yes	-	neg	13433-09-5	279.099	3.90323	M-H2O-H, M-H	C13H16N2O5	70.7	0	HMDB0000706	-	-	-	-	-	Organic acids and derivatives	Carboxylic acids and derivatives	Amino acids, peptides, and analogues	70.7	0	-	-	1.2481	1.2496	3.367e-05	8.92e-05	6.1428	5.9271	5.9892	5.7753	5.8286	5.369	5.3713	5.3646	5.4308	5.4043
neg_2151	S-(PGA2)-glutathione	metab_9034	yes	-	neg	-	640.295	4.26557	M-H	C30H47N3O10S	0	62.6	HMDB0013062	-	-	-	-	-	Organic acids and derivatives	Carboxylic acids and derivatives	Amino acids, peptides, and analogues	0	62.6	-	-	1.5538	1.547	1.217e-06	6.59e-06	6.3685	6.1893	6.3363	6.1964	6.2829	5.3942	5.3522	5.4048	5.6214	5.5475
neg_2152	Mucronine D	metab_9035	yes	C10009	neg	38496-00-3	698.337	4.26557	M+K-2H	C37H51N5O6	0	65	HMDB0029335	-	-	-	-	-	Organic acids and derivatives	Carboxylic acids and derivatives	Amino acids, peptides, and analogues	0	65	-	-	1.1204	1.1161	3.221e-08	1.342e-06	6.3335	6.3413	6.2984	6.2556	6.2596	5.9045	5.8516	5.8769	5.8984	5.8765
neg_2161	Alanyltryptophan	metab_9045	yes	-	neg	16305-75-2	274.12	4.28907	M-H	C14H17N3O3	0	40	HMDB0013209	-	-	-	-	-	Organic acids and derivatives	Carboxylic acids and derivatives	Amino acids, peptides, and analogues	0	40	-	-	1.1526	1.148	5.805e-05	0.0001394	5.8973	5.709	5.7983	5.6921	5.7584	5.2597	5.3178	5.3121	5.4748	5.1869
neg_2188	Isovalerylglutamic acid	metab_9074	yes	-	neg	80154-63-8	230.103	4.35173	M-H	C10H17NO5	0	53.6	HMDB0000726	-	-	-	-	-	Organic acids and derivatives	Carboxylic acids and derivatives	Amino acids, peptides, and analogues	0	53.6	-	-	1.4727	1.4758	4.877e-05	0.0001205	3.2761	3.7281	3.2025	3.3008	3.3131	4.1839	4.1618	4.0955	4.1701	4.0352
neg_2223	Leucyl-Isoleucine	metab_9113	yes	-	neg	-	243.171	4.40655	M-H	C12H24N2O3	0	45.5	HMDB0028932	-	-	-	-	-	Organic acids and derivatives	Carboxylic acids and derivatives	Amino acids, peptides, and analogues	0	45.5	-	-	1.0577	1.0561	6.143e-05	0.000146	6.4356	6.3686	6.3336	6.214	6.2173	5.8769	5.8683	5.9456	6.0185	5.9033
neg_2248	DL-Allylglycine	metab_9140	yes	-	neg	-	344.183	4.4443	3M-H	C5H9NO2	0	43.3	HMDB0251510	-	-	-	-	-	Organic acids and derivatives	Carboxylic acids and derivatives	Amino acids, peptides, and analogues	0	43.3	-	-	1.1161	1.1131	1.255e-05	4.072e-05	6.002	5.8232	5.9548	5.8254	5.8864	5.4212	5.4313	5.4905	5.5722	5.4452
neg_2280	Tryptophyl-Valine	metab_9176	yes	-	neg	-	302.151	4.50172	M-H	C16H21N3O3	0	52.8	HMDB0029096	-	-	-	-	-	Organic acids and derivatives	Carboxylic acids and derivatives	Amino acids, peptides, and analogues	0	52.8	-	-	1.1628	1.1594	0.0001494	0.0003085	5.8248	5.8182	5.626	5.511	5.5527	5.1312	5.1026	5.2316	5.2258	5.2333
neg_2314	Isoleucylhydroxyproline	metab_9214	yes	-	neg	90965-80-3	289.14	4.5596	M+FA-H	C11H20N2O4	0	55.3	HMDB0028908	-	-	-	-	-	Organic acids and derivatives	Carboxylic acids and derivatives	Amino acids, peptides, and analogues	0	55.3	-	-	1.0501	1.0495	5.74e-05	0.0001382	5.5157	5.2906	5.4917	5.3955	5.4003	4.9912	5.0309	4.9568	5.1375	5.0414
neg_2327	Jubanine B	metab_9228	yes	-	neg	60375-08-8	728.348	4.58903	M-H	C43H47N5O6	0	72.6	HMDB0030206	-	-	-	-	-	Organic acids and derivatives	Carboxylic acids and derivatives	Amino acids, peptides, and analogues	0	72.6	-	-	1.1772	1.1733	1.045e-06	5.806e-06	5.9536	5.8781	6.0085	5.8969	5.8848	5.4336	5.4321	5.4225	5.5577	5.4462
neg_2329	4-Hydroxy-3-methoxy-cinnamoylglycine	metab_9230	yes	C02564	neg	-	250.072	4.59687	M-H	C12H13NO5	0	65.9	HMDB0059747	-	-	-	-	-	Organic acids and derivatives	Carboxylic acids and derivatives	Amino acids, peptides, and analogues	0	65.9	-	-	1.0083	1.0095	1.242e-05	4.04e-05	4.1478	4.3228	4.1973	4.1506	4.2318	4.5416	4.6144	4.5225	4.5951	4.5339
neg_2389	Plazomicin	metab_9294	yes	-	neg	-	613.321	4.69113	M+Na-2H	C25H48N6O10	0	75.8	HMDB0256636	-	-	-	-	-	Organic acids and derivatives	Carboxylic acids and derivatives	Amino acids, peptides, and analogues	0	75.8	-	-	1.0036	1.0011	5.8e-05	0.0001394	5.6464	5.4978	5.5722	5.5243	5.5164	5.1513	5.1548	5.1609	5.3458	5.1917
neg_2427	Glycyl-histidyl-arginyl-proline	metab_9337	yes	-	neg	-	486.22	4.7733	M+Na-2H	C19H31N9O5	0	43.7	HMDB0252877	-	-	-	-	-	Organic acids and derivatives	Carboxylic acids and derivatives	Amino acids, peptides, and analogues	0	43.7	-	-	1.1164	1.1073	1.296e-06	6.941e-06	5.7753	5.8727	5.7259	5.8166	5.7452	5.3395	5.3635	5.3415	5.4435	5.3704
neg_2434	N-Methoxysuccinyl-Ala-Ala-Pro-Val	metab_9345	yes	-	neg	-	469.23	4.78798	M-H	C21H34N4O8	0	40	HMDB0255168	-	-	-	-	-	Organic acids and derivatives	Carboxylic acids and derivatives	Amino acids, peptides, and analogues	0	40	-	-	1.2984	1.2903	2.153e-06	1.019e-05	5.2319	5.3712	5.1564	5.223	5.1466	4.666	4.5719	4.6516	4.7178	4.6924
neg_2438	Phenylbutyrylglutamine	metab_9349	yes	-	neg	-	327.112	4.79582	M+Cl	C15H20N2O4	0	38.5	HMDB0011687	-	-	-	-	-	Organic acids and derivatives	Carboxylic acids and derivatives	Amino acids, peptides, and analogues	0	38.5	-	-	1.1067	1.1029	1.651e-05	5.037e-05	4.8125	4.9866	4.8407	5.0163	4.9288	4.4751	4.5836	4.484	4.5041	4.4543
neg_2469	Glycyl-prolyl-glutamic acid	metab_9383	yes	-	neg	-	282.109	4.86442	M-H2O-H	C12H19N3O6	0	31.3	HMDB0252832	-	-	-	-	-	Organic acids and derivatives	Carboxylic acids and derivatives	Amino acids, peptides, and analogues	0	31.3	-	-	1.0401	1.1179	0.01206	0.0165	4.0219	4.0951	4.0992	4.1864	4.0213	3.649	3.7454	3.6637	3.0167	3.8831
neg_251	(His(1-ME)2)-trh	metab_9429	yes	-	neg	-	421.183	4.24918	M-H, M+FA-H	C17H24N6O4	0	60.1	HMDB0246180	-	-	-	-	-	Organic acids and derivatives	Carboxylic acids and derivatives	Amino acids, peptides, and analogues	0	60.1	-	-	1.1183	1.1105	4.302e-07	2.887e-06	5.6451	5.6144	5.5756	5.5697	5.5989	5.1039	5.1647	5.2029	5.2515	5.2027
neg_2519	Kinetensin 1-3	metab_9439	yes	-	neg	138482-55-0	393.199	4.95127	M+Cl	C15H30N6O4	0	61.1	HMDB0012983	-	-	-	-	-	Organic acids and derivatives	Carboxylic acids and derivatives	Amino acids, peptides, and analogues	0	61.1	-	-	1.2861	1.2769	4.708e-08	1.616e-06	6.1464	6.1328	6.0647	6.0516	6.0978	5.5444	5.5436	5.594	5.5995	5.4852
neg_2550	Nelfinavir	metab_9474	yes	C07257	neg	159989-64-7	588.289	5.00087	M+Na-2H	C32H45N3O4S	0	63.5	HMDB0014365	-	-	-	-	-	Organic acids and derivatives	Carboxylic acids and derivatives	Amino acids, peptides, and analogues	0	63.5	-	-	1.6494	1.6396	5.363e-06	2.103e-05	5.8414	5.8976	5.7968	5.7304	5.677	4.8404	4.849	4.6345	5.1188	4.8968
neg_2555	Des-arg(9)-bradykinin	metab_9479	yes	-	neg	-	948.453	5.00822	M+FA-H	C44H61N11O10	0	68.7	HMDB0244716	-	-	-	-	-	Organic acids and derivatives	Carboxylic acids and derivatives	Amino acids, peptides, and analogues	0	68.7	-	-	1.5863	1.5763	1.319e-05	4.232e-05	5.8808	6.0011	5.7321	5.7498	5.6991	5.0913	4.9683	4.7097	5.099	4.9008
neg_2641	O-Tyrosine	metab_9575	yes	-	neg	2370-61-8	361.141	5.1618	2M-H	C9H11NO3	0	47.1	HMDB0006050	-	-	-	-	-	Organic acids and derivatives	Carboxylic acids and derivatives	Amino acids, peptides, and analogues	0	47.1	-	-	2.0916	2.088	6.112e-11	1.264e-08	4.8078	4.7436	4.759	4.8195	4.8357	3.4095	3.3497	3.3136	3.2774	3.4108
neg_2724	Citrusin III	metab_9666	yes	-	neg	-	762.353	5.29132	M+Cl	C36H53N7O9	0	77.1	HMDB0303682	-	-	-	-	-	Organic acids and derivatives	Carboxylic acids and derivatives	Amino acids, peptides, and analogues	0	77.1	-	-	1.0141	1.0062	8.219e-06	2.912e-05	6.1712	6.2259	6.2636	6.334	6.3099	5.9179	5.8993	5.8877	5.9836	5.8809
neg_2805	Tranexamic Acid	metab_9756	yes	C12535	neg	1197-18-8	202.108	5.42703	M+FA-H	C8H15NO2	0	52.8	PW_C008836;HMDB0014447;MJDBOTE0000780	-	-	-	-	-	Organic acids and derivatives	Carboxylic acids and derivatives	Amino acids, peptides, and analogues	0	52.8	-	-	1.2652	1.2621	1.377e-07	1.616e-06	6.6111	6.4907	6.5448	6.4942	6.4859	5.9748	5.965	5.9389	6.035	6.0407
neg_2880	Pyridinoline	metab_9839	yes	-	neg	63800-01-1	427.184	5.5652	M-H	C18H28N4O8	0	38.5	HMDB0000851	-	-	-	-	-	Organic acids and derivatives	Carboxylic acids and derivatives	Amino acids, peptides, and analogues	0	38.5	-	-	1.0024	0.996	1.257e-05	4.073e-05	5.152	5.0796	4.9643	5.0651	5.066	4.6556	4.7226	4.77	4.7081	4.7575
neg_2938	Phenylalanylisoleucine	metab_9903	yes	-	neg	22951-94-6	259.145	5.68528	M-H2O-H	C15H22N2O3	0	45.6	HMDB0028998	-	-	-	-	-	Organic acids and derivatives	Carboxylic acids and derivatives	Amino acids, peptides, and analogues	0	45.6	-	-	1.1735	1.1582	0.0009291	0.001548	4.3064	4.2538	4.2339	4.4602	4.597	3.8367	4.0772	3.8798	3.8966	3.6332
neg_2968	Tolmetin glucuronide	metab_9935	yes	-	neg	71595-19-2	468.106	5.73968	M+Cl	C21H23NO9	0	53.3	HMDB0042044	-	-	-	-	-	Organic acids and derivatives	Carboxylic acids and derivatives	Amino acids, peptides, and analogues	0	53.3	-	-	1.0444	1.0488	0.0002386	0.000463	4.4117	4.173	4.4334	4.128	4.2553	3.8553	3.8704	3.8893	3.9355	3.8651
neg_2999	Remifentanil Acid	metab_9968	yes	-	neg	-	397.153	5.81318	M+Cl	C19H26N2O5	0	50.9	HMDB0257145	-	-	-	-	-	Organic acids and derivatives	Carboxylic acids and derivatives	Amino acids, peptides, and analogues	0	50.9	-	-	1.6867	1.6814	5.614e-06	2.175e-05	3.9429	4.0575	4.221	4.4156	4.3552	3.1968	3.2119	3.2944	3.2769	3.2066
neg_3150	AK toxin I	metab_10137	yes	C16787	neg	85146-09-4	458.186	5.9627	M+FA-H	C23H27NO6	0	49.8	HMDB0030401	-	-	-	-	-	Organic acids and derivatives	Carboxylic acids and derivatives	Amino acids, peptides, and analogues	0	49.8	-	-	1.1264	1.1157	0.0007469	0.001278	6.7301	6.8205	6.698	6.7951	6.6281	6.2205	6.4232	6.4074	6.3085	5.9755
neg_3214	Leucylhydroxyproline	metab_10207	yes	-	neg	63912-01-6	547.294	6.07168	2M+Hac-H	C11H20N2O4	0	40.4	HMDB0028930	-	-	-	-	-	Organic acids and derivatives	Carboxylic acids and derivatives	Amino acids, peptides, and analogues	0	40.4	-	-	1.909	1.9048	5.249e-07	3.432e-06	5.8758	5.9089	5.8384	5.7886	5.9462	4.8589	4.8343	4.5163	4.5624	4.4921
neg_3271	Ibutamoren	metab_10270	yes	-	neg	-	509.219	6.1884	M-H2O-H	C27H36N4O5S	0	30.9	HMDB0253337	-	-	-	-	-	Organic acids and derivatives	Carboxylic acids and derivatives	Amino acids, peptides, and analogues	0	30.9	-	-	2.8239	2.8145	2.262e-10	3.541e-08	6.2687	6.0439	6.1134	5.8806	5.958	3.397	3.4121	3.431	3.4771	3.4068
neg_3453	Argatroban	metab_10472	yes	C04931	neg	74863-84-6	529.222	6.52328	M+Na-2H	C23H36N6O5S	0	38.9	HMDB0014423;PW_C008815	-	-	-	-	-	Organic acids and derivatives	Carboxylic acids and derivatives	Amino acids, peptides, and analogues	0	38.9	-	-	1.2553	1.2581	0.00141	0.002259	4.383	4.2233	4.9046	4.7113	4.7555	3.9623	3.9774	3.9963	4.0424	3.9721
neg_37	Leucyl-leucine	metab_10743	yes	C11332	neg	2883-36-5;3303-31-9	243.171	4.23352	M-H, M+Cl, 2M-H	C12H24N2O3	0	53	HMDB0254039;HMDB0028933	-	-	-	-	-	Organic acids and derivatives	Carboxylic acids and derivatives	Amino acids, peptides, and analogues	0	53	-	-	1.0083	1.0038	2.226e-05	6.415e-05	7.1118	7.0791	7.0287	6.9698	6.9569	6.6416	6.6576	6.682	6.78	6.6408
neg_4746	L-2,3-Dihydrodipicolinate	metab_11902	yes	C03340	neg	16052-12-3	168.029	6.0154	M-H	C7H7NO4	0	43	HMDB0012247;HMDB0303995	-	-	-	-	-	Organic acids and derivatives	Carboxylic acids and derivatives	Amino acids, peptides, and analogues	0	43	-	-	1.7892	1.7849	6.819e-07	4.191e-06	4.9189	4.8139	4.9811	4.7571	4.7897	3.6564	3.814	4.0092	3.7365	3.6662
neg_5092	2-Aminobenzylstatine	metab_12286	yes	-	neg	-	261.161	5.68528	M-H2O-H	C15H24N2O3	0	39.8	HMDB0245010	-	-	-	-	-	Organic acids and derivatives	Carboxylic acids and derivatives	Amino acids, peptides, and analogues	0	39.8	-	-	1.2895	1.2713	5.292e-05	0.0001291	3.6594	3.7563	3.3656	3.6367	3.7561	3.0384	3.0535	3.0724	3.1185	3.0482
neg_5163	N-Lactoylphenylalanine	metab_12365	yes	-	neg	183241-73-8	236.093	5.57748	M-H	C12H15NO4	0	57.3	HMDB0062175	-	-	-	-	-	Organic acids and derivatives	Carboxylic acids and derivatives	Amino acids, peptides, and analogues	0	57.3	-	-	1.1772	1.1751	3.056e-06	1.331e-05	6.7035	6.4842	6.5717	6.5199	6.5438	6.0647	6.0608	6.0765	6.1281	6.1399
neg_5369	Prolylphenylalanine	metab_12592	yes	-	neg	13589-02-1	307.13	5.27165	M+FA-H	C14H18N2O3	0	48.2	HMDB0011179	-	-	-	-	-	Organic acids and derivatives	Carboxylic acids and derivatives	Amino acids, peptides, and analogues	0	48.2	-	-	1.487	1.4887	0.0001427	0.0002972	5.2242	4.9039	4.9307	4.7213	4.7208	3.9259	4.0596	4.1401	4.3587	4.088
neg_5376	(+)-gamma-Hydroxy-L-homoarginine	metab_12600	yes	C08286	neg	1616-99-5	241.072	5.26573	M+K-2H	C7H16N4O3	0	34.8	HMDB0301838	-	-	-	-	-	Organic acids and derivatives	Carboxylic acids and derivatives	Amino acids, peptides, and analogues	0	34.8	-	-	1.2469	1.2402	1.125e-05	3.737e-05	4.1195	4.2012	4.2921	4.1984	4.1021	3.7008	3.5481	3.6915	3.7666	3.5529
neg_5454	(-)-Fumigaclavine B	metab_12687	yes	-	neg	6879-93-2	293.107	5.14658	M+K-2H	C16H20N2O	0	37.6	HMDB0030201	-	-	-	-	-	Organic acids and derivatives	Carboxylic acids and derivatives	Amino acids, peptides, and analogues	0	37.6	-	-	1.511	1.5032	3.923e-07	2.683e-06	4.7338	4.5378	4.6032	4.6534	4.6839	3.8584	3.8998	3.7486	3.975	3.9241
neg_5455	Acetyl-DL-Leucine	metab_12688	yes	C02710	neg	1188-21-2	172.097	5.14658	M-H	C8H15NO3	75.9	0	HMDB0011756	-	-	-	-	-	Organic acids and derivatives	Carboxylic acids and derivatives	Amino acids, peptides, and analogues	75.9	0	-	-	1.2755	1.2738	3.753e-07	2.596e-06	6.1542	5.9558	6.0793	5.9852	6.005	5.4701	5.4969	5.4876	5.4988	5.4933
neg_5524	Phenylalanyl-prolyl-arginine nitrile	metab_12765	yes	-	neg	-	420.21	5.03175	M+Na-2H	C20H29N7O2	0	51.1	HMDB0256435	-	-	-	-	-	Organic acids and derivatives	Carboxylic acids and derivatives	Amino acids, peptides, and analogues	0	51.1	-	-	1.0668	1.0628	4.331e-05	0.0001094	5.292	5.2429	5.1647	5.097	5.1152	4.7297	4.7359	4.7624	4.9045	4.8075
neg_5537	2'-Deoxymugineic acid	metab_12779	yes	C15485	neg	74235-24-8	303.12	5.01605	M-H	C12H20N2O7	0	39.1	HMDB0033909	-	-	-	-	-	Organic acids and derivatives	Carboxylic acids and derivatives	Amino acids, peptides, and analogues	0	39.1	-	-	1.0255	1.022	0.0001743	0.0003514	4.3962	4.4082	4.2974	4.5079	4.2871	4.6031	4.7746	4.7852	4.7687	4.8443
neg_5609	Merodesmosine	metab_12859	yes	-	neg	17096-97-8	383.23	4.90363	M-H2O-H	C18H34N4O6	0	42	HMDB0030407	-	-	-	-	-	Organic acids and derivatives	Carboxylic acids and derivatives	Amino acids, peptides, and analogues	0	42	-	-	1.0518	1.048	2.851e-06	1.264e-05	6.4468	6.319	6.3913	6.3094	6.3412	5.9453	5.9824	5.993	6.0595	5.9598
neg_5648	Collagen	metab_12901	yes	C00211	neg	9064-67-9	845.39	4.84137	M+K-2H	C36H60N10O11	0	54.7	HMDB0303213	-	-	-	-	-	Organic acids and derivatives	Carboxylic acids and derivatives	Amino acids, peptides, and analogues	0	54.7	-	-	1.513	1.5079	1.625e-05	4.971e-05	6.2474	6.3123	6.0153	5.942	5.9333	5.3136	5.1924	5.3849	5.2757	5.3453
neg_5748	Valylhydroxyproline	metab_13012	yes	-	neg	90965-79-0	459.246	4.66703	2M-H	C10H18N2O4	0	73.9	HMDB0029128	-	-	-	-	-	Organic acids and derivatives	Carboxylic acids and derivatives	Amino acids, peptides, and analogues	0	73.9	-	-	1.3592	1.353	3.846e-06	1.606e-05	5.8163	5.7135	5.7295	5.6305	5.6405	5.0148	4.9921	5.0553	5.2448	5.1035
neg_5776	Gamma-Glutamylfelinylglycine	metab_13043	yes	-	neg	-	392.147	4.63315	M-H	C15H27N3O7S	0	53.6	HMDB0252619	-	-	-	-	-	Organic acids and derivatives	Carboxylic acids and derivatives	Amino acids, peptides, and analogues	0	53.6	-	-	1.9667	1.9676	1.548e-07	1.616e-06	5.4093	5.408	5.4906	5.4623	5.6605	4.3848	4.1952	4.0785	4.0561	4.2664
neg_5788	Glycylphenylalanylleucylglycine	metab_13056	yes	-	neg	-	373.188	4.61845	M-H2O-H	C19H28N4O5	0	53.8	HMDB0252827	-	-	-	-	-	Organic acids and derivatives	Carboxylic acids and derivatives	Amino acids, peptides, and analogues	0	53.8	-	-	1.8675	1.8612	2.153e-05	6.236e-05	5.1496	4.8933	4.8158	4.5209	4.6018	3.7149	3.376	3.6928	3.7555	3.4363
neg_5855	Suberylglycine	metab_13131	yes	-	neg	60317-54-6	230.103	4.52827	M-H	C10H17NO5	0	46.3	HMDB0000953	-	-	-	-	-	Organic acids and derivatives	Carboxylic acids and derivatives	Amino acids, peptides, and analogues	0	46.3	-	-	1.1149	1.1292	0.003891	0.005734	3.2329	3.7205	3.2258	3.8323	3.5728	4.0692	3.937	4.0211	4.015	4.0949
neg_5868	Deltorphin II	metab_13145	yes	C18095	neg	122752-16-3	819.352	4.50858	M+K-2H	C38H54N8O10	0	56.6	HMDB0250987	-	-	map07224	Drug Development	Target-based classification: G protein-coupled receptors	Organic acids and derivatives	Carboxylic acids and derivatives	Amino acids, peptides, and analogues	0	56.6	Opioid receptor agonists/antagonists	Opioid receptor agonists/antagonists	1.8995	1.8863	3.59e-05	9.405e-05	5.8203	5.6371	5.6846	5.5854	5.6229	4.4197	4.2205	4.1512	4.9759	4.3809
neg_5992	N-Valylphenylalanine	metab_13282	yes	-	neg	3918-92-1	263.14	4.3439	M-H	C14H20N2O3	82.2	0	HMDB0255244;HMDB0029134	-	-	-	-	-	Organic acids and derivatives	Carboxylic acids and derivatives	Amino acids, peptides, and analogues	82.2	0	-	-	1.0638	1.0602	1.104e-05	3.685e-05	6.2757	6.2002	6.1789	6.1184	6.0995	5.7533	5.7439	5.7872	5.8828	5.7741
neg_6019	Imazethapyr	metab_13313	yes	C18865	neg	81335-77-5	324.112	4.2969	M+Cl	C15H19N3O3	0	34	HMDB0253406	-	-	-	-	-	Organic acids and derivatives	Carboxylic acids and derivatives	Amino acids, peptides, and analogues	0	34	-	-	1.2824	1.2877	0.003093	0.00465	3.3137	3.3707	3.3018	2.8622	2.9563	2.6755	2.3236	2.1278	2.586	2.7781
neg_6116	Alanylproline	metab_13421	yes	-	neg	13485-59-1	371.193	4.17083	2M-H	C8H14N2O3	0	43.5	HMDB0028695	-	-	-	-	-	Organic acids and derivatives	Carboxylic acids and derivatives	Amino acids, peptides, and analogues	0	43.5	-	-	1.0934	1.0894	1.679e-06	8.51e-06	5.9987	5.9522	5.9732	5.882	5.8887	5.48	5.5572	5.5032	5.6118	5.5293
neg_6161	N-(1-Carboxy-3-carboxanilidopropyl)alanylproline	metab_13471	yes	-	neg	-	390.167	4.11602	M-H	C19H25N3O6	0	60.4	HMDB0257086	-	-	-	-	-	Organic acids and derivatives	Carboxylic acids and derivatives	Amino acids, peptides, and analogues	0	60.4	-	-	1.1333	1.1305	4.712e-05	0.0001171	5.7715	5.5599	5.7128	5.6182	5.6338	5.1914	5.1382	5.1839	5.3786	5.174
neg_6218	Threoninyl-Tryptophan	metab_13532	yes	-	neg	186761-42-2	350.136	4.06052	M+FA-H	C15H19N3O4	0	44.1	HMDB0029072;HMDB0304790	-	-	-	-	-	Organic acids and derivatives	Carboxylic acids and derivatives	Amino acids, peptides, and analogues	0	44.1	-	-	1.0065	0.9997	6.824e-07	4.191e-06	5.7708	5.7452	5.7746	5.8088	5.8084	5.458	5.4397	5.3773	5.5079	5.4381
neg_6221	1-Carboxyethyltyrosine	metab_13536	yes	-	neg	-	252.088	4.06052	M-H	C12H15NO5	0	43.9	HMDB0242159	-	-	-	-	-	Organic acids and derivatives	Carboxylic acids and derivatives	Amino acids, peptides, and analogues	0	43.9	-	-	1.8245	1.82	2.547e-07	1.907e-06	5.4694	5.1459	5.4748	5.3175	5.4282	4.2828	4.1242	4.3104	4.2678	4.2827
neg_6258	Acetyl-Ser-Asp-Lys-Pro	metab_13575	yes	-	neg	-	486.221	4.01348	M-H	C20H33N5O9	0	82.5	HMDB0247929	-	-	-	-	-	Organic acids and derivatives	Carboxylic acids and derivatives	Amino acids, peptides, and analogues	0	82.5	-	-	1.1436	1.1362	2.617e-05	7.291e-05	5.7234	5.5711	5.6182	5.5792	5.6334	5.064	5.1883	5.2036	5.323	5.1092
neg_6279	Valylleucine	metab_13598	yes	-	neg	3989-97-7	229.155	3.99718	M-H	C11H22N2O3	0	57.1	HMDB0029131	-	-	-	-	-	Organic acids and derivatives	Carboxylic acids and derivatives	Amino acids, peptides, and analogues	0	57.1	-	-	1.0773	1.0753	9.782e-05	0.0002165	6.876	6.8013	6.7298	6.6471	6.6277	6.2873	6.2769	6.3261	6.4561	6.2949
neg_6301	4-Amino-2-methylenebutanoic acid	metab_13624	yes	-	neg	65370-67-4	344.183	3.96585	3M-H	C5H9NO2	0	39.9	HMDB0030409	-	-	-	-	-	Organic acids and derivatives	Carboxylic acids and derivatives	Amino acids, peptides, and analogues	0	39.9	-	-	1.0744	1.0664	8.372e-07	4.933e-06	6.1416	6.1234	6.1266	6.1199	6.0928	5.7076	5.7221	5.7168	5.8434	5.6925
neg_6334	5-hydroxy saxagliptin	metab_13660	yes	-	neg	-	376.188	3.9267	M+FA-H	C18H25N3O3	0	45.8	HMDB0061099	-	-	-	-	-	Organic acids and derivatives	Carboxylic acids and derivatives	Amino acids, peptides, and analogues	0	45.8	-	-	1.4467	1.441	2.264e-06	1.058e-05	5.9706	5.7236	5.8521	5.722	5.7932	5.0177	5.0599	5.1862	5.2023	5.0678
neg_6338	Leucyl-Methionine	metab_13664	yes	-	neg	-	261.128	3.9267	M-H	C11H22N2O3S	0	31.3	HMDB0028935	-	-	-	-	-	Organic acids and derivatives	Carboxylic acids and derivatives	Amino acids, peptides, and analogues	0	31.3	-	-	1.0009	1.003	0.0001495	0.0003085	5.8368	5.6724	5.6819	5.5826	5.5686	5.3058	5.2547	5.3094	5.3952	5.2886
neg_6344	Glutamyltyrosine	metab_13671	yes	-	neg	3422-39-7	291.099	3.91888	M-H2O-H	C14H18N2O6	0	67.9	HMDB0028831	-	-	-	-	-	Organic acids and derivatives	Carboxylic acids and derivatives	Amino acids, peptides, and analogues	0	67.9	-	-	1.0724	1.0667	0.0002196	0.0004302	5.7732	6.0385	5.9664	6.0882	5.7881	6.3332	6.3376	6.3233	6.3692	6.3516
neg_6345	N5-(4-Methoxybenzyl)glutamine	metab_13672	yes	-	neg	-	247.109	3.91888	M-H2O-H	C13H18N2O4	0	47.4	HMDB0033598	-	-	-	-	-	Organic acids and derivatives	Carboxylic acids and derivatives	Amino acids, peptides, and analogues	0	47.4	-	-	1.3596	1.3665	0.002517	0.003843	3.5383	4.4308	4.3013	4.4549	4.1727	4.8892	4.9026	4.8855	4.925	4.9405
neg_6351	Asparaginyl-Phenylalanine	metab_13679	yes	-	neg	-	278.115	3.91105	M-H	C13H17N3O4	0	67.7	HMDB0028738	-	-	-	-	-	Organic acids and derivatives	Carboxylic acids and derivatives	Amino acids, peptides, and analogues	0	67.7	-	-	1.1112	1.1062	3.422e-08	1.391e-06	6.0603	6.0206	6.0221	5.9952	5.98	5.5917	5.5943	5.5781	5.6619	5.6076
neg_6355	Lysyl-aspartyl-glutamyl-leucine	metab_13683	yes	-	neg	-	502.252	3.90323	M-H	C21H37N5O9	0	54.6	HMDB0247848	-	-	-	-	-	Organic acids and derivatives	Carboxylic acids and derivatives	Amino acids, peptides, and analogues	0	54.6	-	-	1.0643	1.0644	0.0006284	0.001096	5.8183	5.6397	5.6876	5.6668	5.6442	5.1563	5.18	5.2472	5.5411	5.2635
neg_6374	Phosphoramidon	metab_13704	yes	C00563	neg	36357-77-4	588.198	3.8876	M+FA-H	C23H34N3O10P	0	44.3	HMDB0256490	-	-	-	-	-	Organic acids and derivatives	Carboxylic acids and derivatives	Amino acids, peptides, and analogues	0	44.3	-	-	1.5113	1.5061	8.707e-06	3.025e-05	5.9103	5.7817	5.7084	5.5618	5.5446	4.9125	4.8465	4.9942	5.0209	4.8367
neg_6394	Prolyl-Alanine	metab_13726	yes	-	neg	-	431.214	3.87193	2M+Hac-H	C8H14N2O3	0	52.3	HMDB0029010	-	-	-	-	-	Organic acids and derivatives	Carboxylic acids and derivatives	Amino acids, peptides, and analogues	0	52.3	-	-	1.0343	1.032	6.748e-05	0.000158	6.0213	5.8922	5.9036	5.7938	5.8767	5.4619	5.4547	5.542	5.6404	5.5236
neg_6431	Ala-phe	metab_13768	yes	-	neg	3061-90-3	235.108	3.84	M-H	C12H16N2O3	89.5	0	HMDB0028694	-	-	-	-	-	Organic acids and derivatives	Carboxylic acids and derivatives	Amino acids, peptides, and analogues	89.5	0	-	-	1.0937	1.0885	2.287e-06	1.064e-05	6.6816	6.5718	6.583	6.5226	6.5797	6.1502	6.1329	6.1832	6.2573	6.2027
neg_6465	N-(2,3-Dihydroxypropyl)valine	metab_13805	yes	-	neg	-	427.23	3.80083	2M+FA-H	C8H17NO4	0	52.2	HMDB0254994	-	-	-	-	-	Organic acids and derivatives	Carboxylic acids and derivatives	Amino acids, peptides, and analogues	0	52.2	-	-	1.0728	1.091	0.003704	0.005488	5.274	5.0261	5.189	4.8204	4.9016	4.3615	4.5161	4.5806	4.8322	4.6103
neg_6477	Glutaminylisoleucine	metab_13818	yes	-	neg	86416-45-7	258.146	3.78517	M-H	C11H21N3O4	0	64.5	HMDB0028800	-	-	-	-	-	Organic acids and derivatives	Carboxylic acids and derivatives	Amino acids, peptides, and analogues	0	64.5	-	-	1.3164	1.3101	3.117e-07	2.221e-06	6.4982	6.3661	6.3806	6.3145	6.3521	5.7735	5.7703	5.816	5.8826	5.7826
neg_6557	3,5-Dimethyl-3'-isopropyl-L-thyronine	metab_13906	yes	-	neg	-	364.151	3.69047	M+Na-2H	C20H25NO4	0	46.1	HMDB0246061	-	-	-	-	-	Organic acids and derivatives	Carboxylic acids and derivatives	Amino acids, peptides, and analogues	0	46.1	-	-	1.1186	1.117	1.362e-05	4.34e-05	5.7157	5.552	5.6031	5.4836	5.5301	5.0853	5.1038	5.1864	5.2037	5.1554
neg_6577	Imidaprilat	metab_13928	yes	C21519	neg	89371-44-8	422.157	3.66632	M+FA-H	C18H23N3O6	0	70.2	HMDB0041908;HMDB0244459	-	-	-	-	-	Organic acids and derivatives	Carboxylic acids and derivatives	Amino acids, peptides, and analogues	0	70.2	-	-	1.0993	1.0976	2.747e-05	7.569e-05	6.112	5.9153	6.0325	5.9233	5.959	5.4844	5.5455	5.5813	5.6804	5.5618
neg_6625	Alanylisoleucine	metab_13982	yes	-	neg	29727-65-9	183.113	3.62713	M-H2O-H	C9H18N2O3	0	61.7	HMDB0028690	-	-	-	-	-	Organic acids and derivatives	Carboxylic acids and derivatives	Amino acids, peptides, and analogues	0	61.7	-	-	1.11	1.1137	0.0001078	0.0002343	5.2416	5.0143	5.1755	4.9576	4.9673	4.6022	4.6413	4.6179	4.7169	4.581
neg_6656	Threonylhydroxyproline	metab_14016	yes	-	neg	844641-04-9	231.098	3.5958	M-H	C9H16N2O5	0	58.6	HMDB0029062	-	-	-	-	-	Organic acids and derivatives	Carboxylic acids and derivatives	Amino acids, peptides, and analogues	0	58.6	-	-	1.4579	1.4577	0.0003247	0.0006071	3.3732	3.4886	3.8121	3.9597	4.0215	4.5082	4.5447	4.5336	4.4659	4.4804
neg_6699	Hydroxyprolyl-Lysine	metab_14063	yes	-	neg	-	304.151	3.54882	M+FA-H	C11H21N3O4	0	69.2	HMDB0028868	-	-	-	-	-	Organic acids and derivatives	Carboxylic acids and derivatives	Amino acids, peptides, and analogues	0	69.2	-	-	1.4	1.391	1.509e-07	1.616e-06	5.6436	5.4953	5.4579	5.4593	5.5606	4.8606	4.8501	4.9128	4.906	4.84
neg_6737	N2-Succinyl-L-ornithine	metab_14106	yes	C03415	neg	899816-95-6	523.226	3.50913	2M+Hac-H	C9H16N2O5	0	49.2	HMDB0001199	-	-	map01100;map00330	Metabolism;Metabolism	Global and overview maps;Amino acid metabolism	Organic acids and derivatives	Carboxylic acids and derivatives	Amino acids, peptides, and analogues	0	49.2	Metabolic pathways;Arginine and proline metabolism	Metabolic pathways;Arginine and proline metabolism	1.2501	1.2421	1.272e-06	6.852e-06	5.8454	5.9018	5.8154	5.7614	5.7476	5.256	5.2595	5.2491	5.4061	5.2863
neg_6749	Aspartyl-Leucine	metab_14119	yes	-	neg	-	227.103	3.50128	M-H2O-H	C10H18N2O5	0	38.4	HMDB0028757	-	-	-	-	-	Organic acids and derivatives	Carboxylic acids and derivatives	Amino acids, peptides, and analogues	0	38.4	-	-	1.0484	1.0494	7.69e-05	0.0001767	5.9245	5.7728	5.832	5.681	5.7125	5.3421	5.3637	5.4023	5.5073	5.3743
neg_6955	5-Hydroxylysinonorleucine	metab_14347	yes	-	neg	-	272.162	3.31982	M-H2O-H	C12H25N3O5	0	57.2	HMDB0246805	-	-	-	-	-	Organic acids and derivatives	Carboxylic acids and derivatives	Amino acids, peptides, and analogues	0	57.2	-	-	1.1471	1.1433	2.168e-06	1.024e-05	5.6922	5.5058	5.5836	5.5171	5.5601	5.0887	5.1163	5.121	5.1879	5.1245
neg_7068	Pentanoic acid, 5-(dipentylamino)-5-oxo-4-((3-quinolinylcarbonyl)amino)-, (R)-	metab_14473	yes	-	neg	-	478.216	3.22528	M+K-2H	C25H35N3O4	0	59.5	HMDB0247713	-	-	-	-	-	Organic acids and derivatives	Carboxylic acids and derivatives	Amino acids, peptides, and analogues	0	59.5	-	-	1.3941	1.3855	2.689e-06	1.205e-05	6.32	6.2478	6.1356	6.1141	6.1066	5.5139	5.477	5.4909	5.677	5.5006
neg_7082	Linatine	metab_14489	yes	C05939	neg	10139-06-7	517.226	3.20965	2M-H	C10H17N3O5	0	47.3	HMDB0038516	-	-	map01100;map00330	Metabolism;Metabolism	Global and overview maps;Amino acid metabolism	Organic acids and derivatives	Carboxylic acids and derivatives	Amino acids, peptides, and analogues	0	47.3	Metabolic pathways;Arginine and proline metabolism	Metabolic pathways;Arginine and proline metabolism	1.1072	1.101	2.756e-05	7.584e-05	6.052	5.9637	5.9602	5.944	5.9248	5.4597	5.5108	5.5226	5.7182	5.5323
neg_7098	Leucyl-Lysine	metab_14506	yes	-	neg	-	258.182	3.18613	M-H	C12H25N3O3	0	35.2	HMDB0028934	-	-	-	-	-	Organic acids and derivatives	Carboxylic acids and derivatives	Amino acids, peptides, and analogues	0	35.2	-	-	1.1164	1.1234	0.0001247	0.0002649	4.7471	4.5722	4.5182	4.471	4.4365	4.9042	5.0023	5.0991	5.0066	4.9385
neg_7111	Tryptophan glutamate	metab_14521	yes	-	neg	-	348.123	3.15415	M-H	C16H19N3O6	0	73.5	HMDB0259308	-	-	-	-	-	Organic acids and derivatives	Carboxylic acids and derivatives	Amino acids, peptides, and analogues	0	73.5	-	-	1.2611	1.2534	7.39e-07	4.458e-06	6.3554	6.3168	6.2582	6.2019	6.2303	5.6958	5.6933	5.7603	5.8352	5.7258
neg_7133	Lysylhydroxyproline	metab_14545	yes	-	neg	870233-57-1	304.151	3.0444	M+FA-H	C11H21N3O4	0	76.4	HMDB0028952	-	-	-	-	-	Organic acids and derivatives	Carboxylic acids and derivatives	Amino acids, peptides, and analogues	0	76.4	-	-	1.0736	1.0682	3.853e-07	2.644e-06	7.1983	7.1282	7.1218	7.0841	7.0952	6.7178	6.7242	6.7307	6.805	6.7292
neg_7228	Methionyl-Serine	metab_14649	yes	-	neg	-	235.076	1.8316	M-H	C8H16N2O4S	0	51.5	HMDB0028982	-	-	-	-	-	Organic acids and derivatives	Carboxylic acids and derivatives	Amino acids, peptides, and analogues	0	51.5	-	-	1.1412	1.1374	1.742e-05	5.271e-05	6.0175	5.8671	5.8856	5.7956	5.8418	5.4131	5.4076	5.3913	5.5631	5.4024
neg_7279	Aspartyl-Tryptophan	metab_14704	yes	-	neg	-	356.066	1.47117	M+K-2H	C15H17N3O5	0	44.7	HMDB0028764	-	-	-	-	-	Organic acids and derivatives	Carboxylic acids and derivatives	Amino acids, peptides, and analogues	0	44.7	-	-	1.7037	1.7121	5.77e-05	0.0001388	5.5359	5.9679	5.9998	5.9616	6.3181	4.9766	4.9884	4.9339	4.7905	5.0387
neg_7301	N-acetylaspartate	metab_14730	yes	C01042	neg	997-55-7	174.04	1.3222	M-H	C6H9NO5	37.2	0	HMDB0000812	-	-	map01100;map00250	Metabolism;Metabolism	Global and overview maps;Amino acid metabolism	Organic acids and derivatives	Carboxylic acids and derivatives	Amino acids, peptides, and analogues	37.2	0	Metabolic pathways;Alanine, aspartate and glutamate metabolism	Metabolic pathways;Alanine, aspartate and glutamate metabolism	1.0256	1.0197	1.855e-07	1.616e-06	6.3461	6.2779	6.3302	6.3108	6.3551	5.9601	5.9888	5.9277	6.0254	5.9718
neg_7318	Benazeprilat	metab_14748	yes	C21541	neg	86541-78-8	431.14	1.23593	M+Cl	C22H24N2O5	0	35.3	PW_C040467;HMDB0060582	-	-	-	-	-	Organic acids and derivatives	Carboxylic acids and derivatives	Amino acids, peptides, and analogues	0	35.3	-	-	1.0664	1.0759	0.001427	0.002281	6.7155	6.2902	6.6095	6.3473	6.4726	5.9015	5.9935	6.0618	6.1648	6.1224
neg_7374	Glutamylglutamic acid	metab_14808	yes	C01425	neg	3929-61-1	275.089	0.969533	M-H	C10H16N2O7	0	43.1	HMDB0028818	-	-	-	-	-	Organic acids and derivatives	Carboxylic acids and derivatives	Amino acids, peptides, and analogues	0	43.1	-	-	1.0714	1.0701	1.133e-05	3.753e-05	6.4445	6.2809	6.3416	6.2211	6.2679	5.9306	5.9038	5.8936	5.966	5.8913
neg_741	Val-pro-pro	metab_14848	yes	-	neg	-	356.183	4.20998	M-H, M+FA-H	C15H25N3O4	0	68.7	HMDB0253034	-	-	-	-	-	Organic acids and derivatives	Carboxylic acids and derivatives	Amino acids, peptides, and analogues	0	68.7	-	-	1.0309	1.0254	1.189e-05	3.892e-05	5.6441	5.6944	5.6817	5.6975	5.5586	5.2361	5.3043	5.2555	5.3937	5.2717
neg_7521	2-Amino-4-[carbamimidoyl(methyl)amino]butanoic acid	metab_14971	yes	-	neg	-	173.104	0.78925	M-H	C6H14N4O2	0	69.6	HMDB0255374	-	-	-	-	-	Organic acids and derivatives	Carboxylic acids and derivatives	Amino acids, peptides, and analogues	0	69.6	-	-	2.3704	2.3683	2.008e-08	9.773e-07	4.0563	4.4215	4.0298	4.2984	4.4167	6.1075	6.1044	6.1329	6.1034	6.131
neg_761	Prolyl-Histidine	metab_15069	yes	-	neg	-	233.103	3.87193	M-H2O-H, M+Na-2H	C11H16N4O3	0	39.1	HMDB0029019	-	-	-	-	-	Organic acids and derivatives	Carboxylic acids and derivatives	Amino acids, peptides, and analogues	0	39.1	-	-	1.0579	1.0591	0.0004632	0.0008323	3.3959	3.3914	3.3888	3.6951	3.485	3.9572	3.9447	3.9228	3.8845	3.7203
neg_772	Threonylproline	metab_15108	yes	-	neg	46398-79-2	431.214	3.66632	M-H2O-H, 2M-H	C9H16N2O4	0	63.1	HMDB0029069	-	-	-	-	-	Organic acids and derivatives	Carboxylic acids and derivatives	Amino acids, peptides, and analogues	0	63.1	-	-	1.1404	1.134	1.371e-06	7.253e-06	5.8361	5.7216	5.7629	5.7213	5.7319	5.2849	5.2792	5.3512	5.4088	5.2727
neg_886	Asparaginyl-Proline	metab_15234	yes	-	neg	-	517.227	3.53313	2M-H, 2M+Hac-H	C9H15N3O4	0	63	HMDB0028739	-	-	-	-	-	Organic acids and derivatives	Carboxylic acids and derivatives	Amino acids, peptides, and analogues	0	63	-	-	1.0333	1.0361	0.0001094	0.0002374	5.9418	5.6863	5.8355	5.7227	5.7097	5.3294	5.3825	5.4158	5.4807	5.3878
neg_967	Histidylserine	metab_15324	yes	-	neg	21438-60-8	241.092	0.781417	M-H	C9H14N4O4	37	0	HMDB0028894	-	-	-	-	-	Organic acids and derivatives	Carboxylic acids and derivatives	Amino acids, peptides, and analogues	37	0	-	-	1.0778	1.0787	1.13e-07	1.616e-06	5.2754	5.2469	5.2532	5.2061	5.2181	5.6219	5.562	5.6353	5.6725	5.641
neg_3212	N-Choloylglycine	metab_15384	yes	C01921	neg	56-86-0;475-31-0	464.302	6.07168	M-H	C26H43NO6	0	56.3	HMDB0000148;HMDB0000138;HMDB0255104	Steroids	24-Carbon atoms	map01100;map04976;map04979;map00121;map00120	Metabolism;Organismal Systems;Organismal Systems;Metabolism;Metabolism	Global and overview maps;Digestive system;Digestive system;Lipid metabolism;Lipid metabolism	Organic acids and derivatives	Carboxylic acids and derivatives	Amino acids, peptides, and analogues	0	56.3	Metabolic pathways;Bile secretion;Cholesterol metabolism;Secondary bile acid biosynthesis;Primary bile acid biosynthesis	Metabolic pathways;Bile secretion;Cholesterol metabolism;Secondary bile acid biosynthesis;Primary bile acid biosynthesis	1.1078	1.1001	1.473e-06	7.681e-06	6.9962	6.9136	7.0103	6.9834	6.991	6.5596	6.5673	6.6048	6.6377	6.4719
pos_219	(2R,3R)-2-Aminooctadecane-1,3-diol	metab_1316	yes	-	pos	-	302.305	6.43272	M+H-H2O, M+H, M+H-2H2O	C18H39NO2	0	45.4	HMDB0242634	-	-	-	-	-	Organic nitrogen compounds	Organonitrogen compounds	Amines	0	45.4	-	-	1.0711	1.0635	0.0003572	0.001077	6.3097	6.1152	6.2857	6.2216	6.2836	5.9716	5.8636	5.9122	6.0588	5.835
pos_3669	Sphingosine	metab_2940	yes	C00319	pos	123-78-4	300.289	6.84615	M+H	C18H37NO2	75.7	0	PW_C000172;LMSP01010001;HMDB0000252	-	-	map00600;map01100;map04071;map04210;map04217	Metabolism;Metabolism;Environmental Information Processing;Cellular Processes;Cellular Processes	Lipid metabolism;Global and overview maps;Signal transduction;Cell growth and death;Cell growth and death	Organic nitrogen compounds	Organonitrogen compounds	Amines	75.7	0	Sphingolipid metabolism;Metabolic pathways;Sphingolipid signaling pathway;Apoptosis;Necroptosis	Sphingolipid metabolism;Metabolic pathways;Sphingolipid signaling pathway;Apoptosis;Necroptosis	1.0958	1.0815	0.0008307	0.00214	6.0004	5.9661	6.1156	6.1028	6.2459	5.8576	5.7723	5.8158	5.658	5.6483
pos_4304	N,N-Dimethylsphingosine	metab_3640	yes	C13914	pos	122314-67-4	328.321	7.02877	M+H	C20H41NO2	0	47.9	HMDB0013645;LMSP01070001	-	-	-	-	-	Organic nitrogen compounds	Organonitrogen compounds	Amines	0	47.9	-	-	1.1473	1.1228	0.005401	0.01053	5.5256	5.4737	5.58	5.6241	5.7885	5.3307	5.2777	5.3773	5.133	4.8724
pos_4441	Linoleoyl Ethanolamide	metab_3791	yes	C13828	pos	68171-52-8	324.289	6.7427	M+H	C20H37NO2	72.5	0	HMDB0012252;HMDB0013624	-	-	-	-	-	Organic nitrogen compounds	Organonitrogen compounds	Amines	72.5	0	-	-	1.7745	1.751	7.022e-05	0.0002981	5.861	5.4021	5.8287	5.824	5.9746	4.886	5.0531	4.8013	5.0823	4.8888
pos_488	Hexazinone	metab_4272	yes	C10926	pos	51235-04-2	270.192	3.04105	M+NH4, 2M+K	C12H20N4O2	32.5	0	HMDB0253153	-	-	-	-	-	Organic nitrogen compounds	Organonitrogen compounds	Amines	32.5	0	-	-	1.2973	1.2825	9.317e-05	0.0003699	4.8158	4.9054	4.9429	4.9215	4.9616	4.6034	4.2756	4.3894	4.5185	4.5104
neg_4353	(4E,14Z)-2-Aminooctadeca-4,14-diene-1,3-diol	metab_11467	yes	-	neg	-	342.265	6.55457	M+FA-H	C18H35NO2	0	34.9	HMDB0242112	-	-	-	-	-	Organic nitrogen compounds	Organonitrogen compounds	Amines	0	34.9	-	-	1.3644	1.3543	6.751e-06	2.5e-05	5.3884	5.6565	5.3608	5.4233	5.4688	4.8328	4.7121	4.8709	4.8621	4.8805
neg_7170	Lactic Acid	metab_15379	yes	C00954	neg	87-51-4;79-33-4;10326-41-7;50-21-5	269.088	2.50508	3M-H	C3H6O3	31.9	0	HMDB0001311;HMDB0000197;HMDB0000190	-	-	map01100;map01070;map00380;map04075	Metabolism;Metabolism;Metabolism;Environmental Information Processing	Global and overview maps;Chemical structure transformation maps;Amino acid metabolism;Signal transduction	Organic acids and derivatives	Hydroxy acids and derivatives	Alpha hydroxy acids and derivatives	31.9	0	Metabolic pathways;Biosynthesis of plant hormones;Tryptophan metabolism;Plant hormone signal transduction	Metabolic pathways;Biosynthesis of plant hormones;Tryptophan metabolism;Plant hormone signal transduction	1.1817	1.1777	2.109e-05	6.139e-05	5.643	5.4142	5.5774	5.5302	5.5293	5.0597	5.0303	4.9459	5.1916	5.0606
pos_1836	Lichenin	metab_926	yes	C00478	pos	1402-10-4	347.094	1.06413	2M+Na	C6H10O5	0	46.9	HMDB0302349	-	-	-	-	-	Organic oxygen compounds	Organooxygen compounds	Alcohols and polyols	0	46.9	-	-	2.4087	2.3885	6.381e-11	2.703e-08	3.8409	3.9303	3.8461	3.8657	3.8629	5.3785	5.3887	5.2716	5.2485	5.3274
pos_3382	Ovalicin	metab_2629	yes	C09674	pos	19683-98-8	261.148	6.0355	M+H-2H2O	C16H24O5	0	71.4	HMDB0246031;HMDB0038120	-	-	-	-	-	Organic oxygen compounds	Organooxygen compounds	Alcohols and polyols	0	71.4	-	-	1.6633	1.6562	4.379e-08	3.463e-06	5.7586	5.8927	5.7929	5.8657	5.804	5.1787	5.1135	5.0397	5.1083	5.1732
pos_3488	Cyperolone	metab_2744	yes	C16946	pos	13741-46-3	259.169	6.25773	M+Na	C15H24O2	0	70.4	HMDB0036680	-	-	-	-	-	Organic oxygen compounds	Organooxygen compounds	Alcohols and polyols	0	70.4	-	-	1.1609	1.148	4.384e-07	1.429e-05	5.4268	5.3777	5.4553	5.4676	5.4511	5.1156	5.0495	5.1141	5.1323	5.0574
pos_4397	Risbitin	metab_3741	yes	C09715	pos	-	508.34	6.8064	2M+ACN+Na	C14H22O2	0	51.8	HMDB0302980	-	-	-	-	-	Organic oxygen compounds	Organooxygen compounds	Alcohols and polyols	0	51.8	-	-	1.0962	1.0824	5.634e-05	0.0002499	6.4267	6.608	6.3984	6.4774	6.3834	6.7811	6.7889	6.7863	6.7497	6.779
pos_5145	Cyclohexa-2,4-dienylmethanol	metab_4565	yes	-	pos	-	111.081	5.9398	M+H	C7H10O	0	40.7	HMDB0250648	-	-	-	-	-	Organic oxygen compounds	Organooxygen compounds	Alcohols and polyols	0	40.7	-	-	1.1173	1.1018	0.0008955	0.002283	3.7363	3.885	3.5761	3.8188	3.7286	3.3721	3.3861	3.4773	3.5004	3.2463
neg_1055	N-(Hydroxymethyl)acrylamide	metab_7819	yes	C19456	neg	924-42-5	247.093	0.961717	2M+FA-H	C4H7NO2	0	46.4	HMDB0255023	-	-	-	-	-	Organic acids and derivatives	Carboxylic acids and derivatives	Acrylic acids and derivatives	0	46.4	-	-	1.0496	1.0458	5.711e-06	2.204e-05	7.0148	6.9092	6.9567	6.8909	6.8906	6.5273	6.533	6.5276	6.663	6.5431
pos_4749	(3R, 6'Z)-3,4-Dihydro-8-hydroxy-3-(6-pentadecenyl)-1H-2-benzopyran-1-one	metab_4128	yes	-	pos	158627-94-2	390.3	6.28965	M+NH4	C24H36O3	0	59.4	HMDB0041301	-	-	-	-	-	Organoheterocyclic compounds	Benzopyrans	2-benzopyrans	0	59.4	-	-	1.5874	1.5666	8.172e-07	2.072e-05	5.0694	5.0136	5.0885	5.0993	5.2861	4.4741	4.4641	4.4578	4.5054	4.4681
pos_3365	3-Pentadecylphenol	metab_2610	yes	-	pos	501-24-6	327.268	6.0035	M+Na	C21H36O	0	59.8	LMPK15010004;HMDB0033872	-	-	-	-	-	Benzenoids	Phenols	1-hydroxy-4-unsubstituted benzenoids	0	59.8	-	-	1.1449	1.1413	0.0008132	0.0021	4.6651	4.4594	4.8347	4.6719	4.8422	5.0416	5.0719	5.0868	5.027	5.1239
pos_713	Etilefrine	metab_6757	yes	-	pos	-	214.144	4.74435	M+Na, M+CH3OH+H	C10H15NO2	0	38.2	HMDB0252100	-	-	-	-	-	Benzenoids	Phenols	1-hydroxy-4-unsubstituted benzenoids	0	38.2	-	-	1.0451	1.0403	1.576e-05	9.282e-05	4.4815	4.5617	4.5017	4.6129	4.6064	4.8641	4.8657	4.7798	4.8626	4.8344
pos_2288	P-Benzosemiquinone	metab_1423	yes	C02389	pos	-	238.107	3.13712	2M+NH4	C6H6O2	0	31.2	HMDB0256033	-	-	map05208	Human Diseases	Cancer: overview	Benzenoids	Phenols	1-hydroxy-2-unsubstituted benzenoids	0	31.2	Chemical carcinogenesis - reactive oxygen species	Chemical carcinogenesis - reactive oxygen species	1.1237	1.1154	9.725e-09	1.313e-06	4.5628	4.5194	4.534	4.556	4.5099	4.8634	4.8379	4.8289	4.8661	4.8712
neg_1702	4-Hydroxyphenylacetic acid sulfate	metab_8536	yes	-	neg	-	230.997	3.66632	M-H	C8H8O6S	0	30.4	HMDB0304906	-	-	-	-	-	Benzenoids	Phenols	1-hydroxy-2-unsubstituted benzenoids	0	30.4	-	-	1.133	1.1308	3.76e-07	2.596e-06	5.7138	5.8186	5.7683	5.8407	5.8584	6.2311	6.2674	6.233	6.1969	6.2246
pos_1275	5'-Carboxy-gamma-chromanol	metab_306	yes	-	pos	1221262-11-8	307.19	6.12315	M+H, M+NH4	C18H26O4	0	57.8	HMDB0012799	-	-	-	-	-	Organoheterocyclic compounds	Benzopyrans	1-benzopyrans	0	57.8	-	-	1.1601	1.1493	6.815e-06	4.835e-05	5.476	5.5914	5.4659	5.5932	5.5208	5.2115	5.1711	5.1804	5.2321	5.1159
pos_3602	Homodolicholide	metab_2868	yes	-	pos	86630-40-2	515.334	6.63155	M+Na	C29H48O6	0	72.9	HMDB0033907	-	-	-	-	-	Organoheterocyclic compounds	Benzopyrans	1-benzopyrans	0	72.9	-	-	2.2146	2.1834	1.441e-05	8.686e-05	4.2139	4.3153	4.8772	4.6803	4.25	5.7866	5.7806	5.6894	5.6244	5.8061
pos_5618	Cromakalim	metab_5084	yes	C11819	pos	94470-67-4	319.165	5.00975	M+CH3OH+H	C16H18N2O3	0	64.4	HMDB0250542	-	-	-	-	-	Organoheterocyclic compounds	Benzopyrans	1-benzopyrans	0	64.4	-	-	1.1507	1.1382	0.0001055	0.0004077	5.2131	5.0376	5.2188	5.1995	5.2963	4.8144	4.9387	4.7836	4.8099	4.8449
pos_7195	1-(1,2,3,4,5-Pentahydroxypent-1-yl)-1,2,3,4-tetrahydro-beta-carboline-3-carboxylate	metab_6829	yes	-	pos	-	430.157	2.50832	M+ACN+Na	C17H22N2O7	0	57.9	HMDB0012492	-	-	-	-	-	Organoheterocyclic compounds	Benzopyrans	1-benzopyrans	0	57.9	-	-	1.2745	1.2667	2.314e-06	4.06e-05	5.6935	5.6208	5.6641	5.6001	5.5319	5.1543	5.181	5.2005	5.2837	5.1879
neg_4693	Cowagarcinone D	metab_11843	yes	-	neg	-	507.203	6.06387	M+FA-H	C28H30O6	0	55.8	HMDB0304628	-	-	-	-	-	Organoheterocyclic compounds	Benzopyrans	1-benzopyrans	0	55.8	-	-	1.761	1.7871	0.003787	0.005598	4.6803	4.043	4.6387	3.7377	2.9577	2.6994	2.7144	2.7333	2.7794	2.7091
neg_5822	Gambogic acid	metab_13095	yes	C10062	neg	2752-65-0	673.306	4.56745	M+FA-H	C38H44O8	0	34.6	HMDB0034095	-	-	-	-	-	Organoheterocyclic compounds	Benzopyrans	1-benzopyrans	0	34.6	-	-	1.2538	1.2464	5.089e-07	3.353e-06	5.4599	5.4107	5.4866	5.4603	5.412	4.8824	4.9166	4.8729	5.0506	4.887
pos_2677	Antramycin	metab_1851	yes	-	pos	-	348.155	4.02797	M+CH3OH+H	C16H17N3O4	0	60.7	HMDB0248464	-	-	-	-	-	Organoheterocyclic compounds	Benzodiazepines	1,4-benzodiazepines	0	60.7	-	-	2.4749	2.4521	5.717e-07	1.673e-05	5.1006	4.7669	5.1084	4.7815	5.0418	3.4423	3.1028	3.4258	3.4438	3.573
pos_5021	3-keto-Digoxigenin	metab_4431	yes	C07359	pos	-	421.258	6.04348	M+CH3OH+H	C23H32O5	0	40.1	HMDB0060746	-	-	-	-	-	Organoheterocyclic compounds	Benzodiazepines	1,4-benzodiazepines	0	40.1	-	-	1.5834	1.5919	8.101e-05	0.0003344	4.7636	4.9579	4.768	4.9971	4.8578	3.9641	4.1352	4.4244	4.1548	4.3016
pos_2624	Methotrexate	metab_1794	yes	C01937	pos	1959-05-02	487.204	3.90663	M+CH3OH+H	C20H22N8O5	0	50.5	HMDB0248287;PW_C009057;HMDB0014703;MJDBOTE0000857	-	-	map04976	Organismal Systems	Digestive system	Organoheterocyclic compounds	Triazines	1,3,5-triazines	0	50.5	Bile secretion	Bile secretion	1.6346	1.6218	8.245e-07	2.072e-05	4.6361	4.7775	4.5861	4.8403	4.7573	5.4489	5.4335	5.3634	5.3596	5.4174
pos_1292	9S,10S,11R-trihydroxy-12Z-octadecenoic acid	metab_325	yes	-	pos	-	313.237	6.0993	M+H-H2O, M+NH4	C18H34O5	42.2	0	LMFA02000011	-	-	-	-	-	-	-	-	42.2	0	-	-	1.5139	1.4985	0.0007035	0.001862	3.7692	4.0327	4.0581	4.2319	3.9506	3.6187	3.3522	3.3704	3.442	3.0352
pos_1408	Val Leu Leu Gly Thr	metab_454	yes	-	pos	-	502.323	4.81707	M+H, M+Na	C23H43N5O7	37.8	0	-	-	-	-	-	-	-	-	-	37.8	0	-	-	1.0659	1.0748	0.003935	0.008075	5.3073	5.6518	5.4352	5.7223	5.7524	5.9411	5.8896	5.9154	5.9021	5.9968
pos_1426	Ser Leu Ile	metab_474	yes	-	pos	-	332.218	4.4632	M+H, M+Na	C15H29N3O5	94.9	0	-	-	-	-	-	-	-	-	-	94.9	0	-	-	1.2472	1.2346	6.956e-08	4.639e-06	6.4659	6.5124	6.4403	6.4381	6.4624	6.0829	6.0689	6.0964	6.0991	6.0105
pos_1474	Val Thr Val	metab_527	yes	-	pos	-	318.202	3.39213	M+H, M+Na	C14H27N3O5	75.9	0	-	-	-	-	-	-	-	-	-	75.9	0	-	-	1.2691	1.2592	9.893e-06	6.484e-05	5.7724	5.6364	5.7012	5.6193	5.6468	5.2261	5.218	5.2303	5.3853	5.2189
pos_1475	Glu Phe	metab_528	yes	-	pos	-	295.129	3.36832	M+H-H2O, M+H	C14H18N2O5	71.5	0	-	-	-	-	-	-	-	-	-	71.5	0	-	-	1.0372	1.027	7.274e-08	4.639e-06	5.8433	5.7868	5.8251	5.8065	5.8457	5.551	5.5326	5.5251	5.5639	5.5758
pos_1503	ALANYL-dl-LEUCINE	metab_560	yes	-	pos	-	203.139	3.02515	M+H, M+Na	C9H18N2O3	58.2	0	-	-	-	-	-	-	-	-	-	58.2	0	-	-	1.0707	1.0696	0.0004057	0.001193	7.1488	6.998	6.9848	6.9016	6.9297	6.6397	6.6375	6.6719	6.8058	6.6094
pos_1595	Lys His	metab_661	yes	-	pos	-	284.172	0.875	M+H-H2O, M+H	C12H21N5O3	33.2	0	-	-	-	-	-	-	-	-	-	33.2	0	-	-	1.2481	1.2388	9.873e-06	6.477e-05	6.0769	6.0417	6.0902	6.0332	5.9565	5.5806	5.5964	5.6513	5.7589	5.575
pos_1687	Ala Leu Lys	metab_762	yes	-	pos	-	331.234	1.60557	M+2H, M+H	C15H30N4O4	31.3	0	-	-	-	-	-	-	-	-	-	31.3	0	-	-	1.1463	1.1372	1.105e-05	7.033e-05	6.14	6.0407	6.075	6.0454	6.0464	5.72	5.7129	5.6465	5.8343	5.7195
pos_181	Ser Ile His	metab_898	yes	-	pos	-	356.193	1.76557	M+2H, M+H, M+ACN+H	C15H25N5O5	66.4	0	-	-	-	-	-	-	-	-	-	66.4	0	-	-	1.2407	1.232	1.526e-05	9.063e-05	6.4876	6.4103	6.4108	6.3232	6.3358	5.9848	5.9368	5.9632	6.1139	5.9511
pos_1955	Ile Glu Glu	metab_1057	yes	-	pos	-	390.187	1.916	M+H	C16H27N3O8	49.8	0	-	-	-	-	-	-	-	-	-	49.8	0	-	-	2.8159	2.7943	5.146e-14	1.526e-10	3.7532	3.7493	3.7585	3.778	3.7753	5.7024	5.7497	5.7368	5.7382	5.8072
pos_1996	Pro Pro Thr	metab_1102	yes	-	pos	-	314.171	2.52433	M+H	C14H23N3O5	55.6	0	-	-	-	-	-	-	-	-	-	55.6	0	-	-	1.3944	1.3896	0.000327	0.001004	6.5412	6.3372	6.2901	6.1117	6.2353	5.6548	5.7065	5.7627	5.9772	5.7202
pos_2083	Val Lys Val	metab_1199	yes	-	pos	-	345.249	2.74802	M+H	C16H32N4O4	40.6	0	-	-	-	-	-	-	-	-	-	40.6	0	-	-	1.3371	1.3344	0.0003977	0.001174	5.6369	5.4531	5.4927	5.2367	5.3096	4.8406	4.791	4.9624	5.0744	4.9536
pos_211	Glu Leu	metab_1229	yes	-	pos	-	261.144	3.08088	M+H, M+Na, M+H-H2O	C11H20N2O5	70.5	0	-	-	-	-	-	-	-	-	-	70.5	0	-	-	1.2536	1.2422	1.587e-06	3.168e-05	6.9809	6.89	6.8938	6.8064	6.8677	6.481	6.4397	6.494	6.5375	6.4697
pos_2125	Pro Ile Gln	metab_1246	yes	-	pos	-	357.213	2.8037	M+H	C16H28N4O5	45.4	0	-	-	-	-	-	-	-	-	-	45.4	0	-	-	1.2403	1.2313	2.949e-05	0.0001518	5.6621	5.4892	5.6153	5.5169	5.5419	5.039	5.1478	5.1539	5.2628	5.1848
pos_2244	Gly Gln Ile	metab_1376	yes	-	pos	-	317.182	3.04903	M+H	C13H24N4O5	66.6	0	-	-	-	-	-	-	-	-	-	66.6	0	-	-	1.1663	1.1581	2.626e-07	1.082e-05	5.5528	5.5801	5.513	5.4673	5.4836	5.1809	5.1482	5.1847	5.1781	5.1712
pos_2260	D-Galactosamine	metab_1393	yes	C02262	pos	7535-00-4	180.088	3.08088	M+H	C6H13NO5	31.3	0	MJDBOTE0000404	Carbohydrates	Monosaccharides	map01100;map02060;map00052	Metabolism;Environmental Information Processing;Metabolism	Global and overview maps;Membrane transport;Carbohydrate metabolism	-	-	-	31.3	0	Metabolic pathways;Phosphotransferase system (PTS);Galactose metabolism	Metabolic pathways;Phosphotransferase system (PTS);Galactose metabolism	1.1731	1.1604	2.694e-06	4.363e-05	5.0136	4.9897	5.0665	5.0661	5.101	4.7777	4.6572	4.6506	4.6932	4.6964
pos_2276	Ile Leu Gln	metab_1410	yes	-	pos	-	373.244	3.1052	M+H	C17H32N4O5	51.2	0	-	-	-	-	-	-	-	-	-	51.2	0	-	-	1.3282	1.3166	1.43e-06	2.985e-05	5.6093	5.5374	5.555	5.4464	5.4964	5.0542	5.017	5.0867	5.1558	5.0662
pos_2289	Thr Val Val	metab_1424	yes	-	pos	-	318.202	3.13712	M+H	C14H27N3O5	47.2	0	-	-	-	-	-	-	-	-	-	47.2	0	-	-	1.1055	1.0975	5.678e-05	0.0002517	5.8648	5.7862	5.7635	5.6811	5.7366	5.4455	5.3483	5.441	5.5346	5.4341
pos_2323	Ser Gly Ile	metab_1463	yes	-	pos	-	276.155	3.2014	M+H	C11H21N3O5	37.8	0	-	-	-	-	-	-	-	-	-	37.8	0	-	-	1.0755	1.0642	1.499e-06	3.088e-05	6.0347	5.9309	5.9793	5.9638	5.9897	5.7006	5.6683	5.6451	5.7385	5.6667
pos_2329	Gln Thr Leu	metab_1469	yes	-	pos	-	361.207	3.2174	M+H	C15H28N4O6	71.5	0	-	-	-	-	-	-	-	-	-	71.5	0	-	-	1.029	1.0304	0.0005161	0.001445	5.4572	5.2924	5.305	5.2067	5.2381	4.9841	4.9362	4.9654	5.119	5.0022
pos_2348	Ile Lys Val	metab_1490	yes	-	pos	-	359.265	3.25738	M+H	C17H34N4O4	67.4	0	-	-	-	-	-	-	-	-	-	67.4	0	-	-	1.8168	1.8051	3.543e-05	0.0001741	5.3744	4.9495	5.0858	4.8537	4.9845	4.2395	4.0435	4.2929	4.0175	4.2638
pos_2378	Thr Glu Ile	metab_1522	yes	-	pos	-	362.192	3.34438	M+H	C15H27N3O7	81.2	0	-	-	-	-	-	-	-	-	-	81.2	0	-	-	1.1233	1.1123	2.389e-06	4.14e-05	5.8268	5.8123	5.8438	5.7855	5.8132	5.4992	5.44	5.4396	5.5791	5.5017
pos_2384	Ile Ile Asp	metab_1529	yes	-	pos	-	360.213	3.35237	M+H	C16H29N3O6	68.5	0	-	-	-	-	-	-	-	-	-	68.5	0	-	-	1.2261	1.2225	0.0008945	0.002282	5.6914	5.5301	5.4784	5.2012	5.4004	4.9666	4.9918	5.0459	5.111	5.0274
pos_2476	His Leu Ile	metab_1631	yes	-	pos	-	382.245	3.5686	M+H	C18H31N5O4	77.5	0	-	-	-	-	-	-	-	-	-	77.5	0	-	-	1.0103	1.0015	0.0001259	0.0004684	5.0355	5.028	4.9	4.8963	4.9408	4.6061	4.6446	4.6892	4.7489	4.7289
pos_2480	Leu Leu Glu	metab_1636	yes	-	pos	-	374.228	3.5766	M+H	C17H31N3O6	48.2	0	-	-	-	-	-	-	-	-	-	48.2	0	-	-	1.5006	1.4934	0.0001074	0.0004131	5.7956	5.6232	5.5553	5.3144	5.4236	4.9017	4.9056	4.8952	5.0337	4.9203
pos_2509	Thr Ile Val	metab_1668	yes	-	pos	-	332.218	3.62515	M+H	C15H29N3O5	63.5	0	-	-	-	-	-	-	-	-	-	63.5	0	-	-	1.1552	1.1527	0.0003999	0.001179	5.6981	5.5367	5.4878	5.3551	5.4201	5.1127	5.0533	5.112	5.2201	5.1316
pos_2598	Leu Ile	metab_1766	yes	-	pos	-	245.186	3.84197	M+H	C12H24N2O3	75.4	0	-	-	-	-	-	-	-	-	-	75.4	0	-	-	1.0027	0.998	0.0001262	0.0004691	6.6122	6.5443	6.4769	6.4364	6.4297	6.2381	6.1714	6.2034	6.2882	6.2296
pos_260	13(S)-HOTrE	metab_1769	yes	C16316	pos	-	277.216	7.80733	M+H-H2O, M+Na, M+H	C18H30O3	67	0	-	-	-	map00592	Metabolism	Lipid metabolism	-	-	-	67	0	alpha-Linolenic acid metabolism	alpha-Linolenic acid metabolism	1.2858	1.2765	0.0004366	0.001259	4.7502	4.672	4.4931	4.3743	4.5227	4.1654	4.054	4.1029	4.2249	3.9683
pos_2674	Val Asp Leu	metab_1848	yes	-	pos	-	346.197	4.01997	M+H	C15H27N3O6	79.9	0	-	-	-	-	-	-	-	-	-	79.9	0	-	-	1.2987	1.2881	1.263e-05	7.806e-05	6.3325	6.2191	6.3026	6.1871	6.241	5.7766	5.7909	5.769	5.9673	5.7778
pos_2745	Phe Ile	metab_1927	yes	-	pos	-	279.17	4.22932	M+H	C15H22N2O3	78.7	0	-	-	-	-	-	-	-	-	-	78.7	0	-	-	1.0556	1.0519	0.0006704	0.001788	6.1408	6.0776	5.9349	5.8591	5.8694	5.6717	5.5895	5.6598	5.6835	5.6842
pos_2753	Asp Val Phe	metab_1936	yes	-	pos	-	380.181	4.25333	M+H	C18H25N3O6	40.4	0	-	-	-	-	-	-	-	-	-	40.4	0	-	-	1.1469	1.1275	0.0005734	0.001574	4.7561	4.678	4.8016	4.9312	4.9047	4.4774	4.5264	4.369	4.5613	4.3146
pos_2799	Thr Ile Leu	metab_1986	yes	-	pos	-	346.233	4.3746	M+H	C16H31N3O5	72.8	0	-	-	-	-	-	-	-	-	-	72.8	0	-	-	1.1508	1.1465	0.0002135	0.0007073	5.7615	5.7139	5.6585	5.5002	5.5546	5.259	5.2007	5.241	5.3802	5.2831
pos_2852	Ile Ala Ile	metab_2044	yes	-	pos	-	316.223	4.51983	M+H	C15H29N3O4	89.6	0	-	-	-	-	-	-	-	-	-	89.6	0	-	-	1.087	1.0816	0.0001521	0.0005429	5.4841	5.4402	5.4661	5.3604	5.3865	5.0888	5.0601	5.0846	5.2687	5.0329
pos_2937	Ile Asp Ile	metab_2138	yes	-	pos	-	360.213	4.78507	M+H	C16H29N3O6	53.8	0	-	-	-	-	-	-	-	-	-	53.8	0	-	-	1.2991	1.2918	6.605e-05	0.0002839	5.6831	5.5327	5.6575	5.481	5.5616	5.1138	5.0772	5.099	5.313	5.0614
pos_2980	Asp Glu Leu Val Ile	metab_2186	yes	-	pos	-	588.323	4.90507	M+H	C26H45N5O10	60.4	0	-	-	-	-	-	-	-	-	-	60.4	0	-	-	1.7175	1.702	1.078e-05	6.899e-05	5.3536	5.3404	5.3873	5.3704	5.2836	4.3967	4.5909	4.4923	4.8587	4.5481
pos_3323	Beta-Zearalanol	metab_2565	yes	C14753	pos	42422-68-4	323.185	5.9238	M+H	C18H26O5	62.7	0	-	-	-	-	-	-	-	-	-	62.7	0	-	-	1.1028	1.1449	0.04043	0.05931	4.044	4.3787	4.0679	4.2369	4.2007	3.7251	4.1801	4.0629	3.3445	3.3072
pos_3397	Tricin	metab_2645	yes	C10193	pos	520-32-1	331.081	6.05937	M+H	C17H14O7	89.5	0	LMPK12110873	-	-	-	-	-	-	-	-	89.5	0	-	-	1.1943	1.1765	0.0004246	0.001231	4.9706	4.7325	4.856	4.9501	5.0601	4.4933	4.6742	4.4973	4.4931	4.4491
pos_3419	5,6,7,8-tetrahydro-2-Naphthoic Acid	metab_2669	yes	C14111	pos	1131-63-1	177.091	6.1152	M+H	C11H12O2	37.2	0	-	-	-	map00626;map01120	Metabolism;Metabolism	Xenobiotics biodegradation and metabolism;Global and overview maps	-	-	-	37.2	0	Naphthalene degradation;Microbial metabolism in diverse environments	Naphthalene degradation;Microbial metabolism in diverse environments	1.2233	1.2134	0.0005978	0.001628	4.898	5.2039	5.0487	5.1553	5.0426	4.6291	4.7736	4.604	4.7686	4.4776
pos_388	Asp Ile Lys	metab_3170	yes	-	pos	-	375.223	1.86097	M+2H, M+H	C16H30N4O6	67.6	0	-	-	-	-	-	-	-	-	-	67.6	0	-	-	1.3662	1.3554	1.921e-06	3.49e-05	6.4143	6.381	6.3729	6.2587	6.269	5.8687	5.8891	5.8315	5.9194	5.7822
pos_389	His His	metab_3181	yes	-	pos	-	293.135	2.13595	M+H-2H2O, M+H	C12H16N6O3	90	0	-	-	-	-	-	-	-	-	-	90	0	-	-	1.4734	1.463	6.805e-05	0.0002916	5.1354	5.2826	5.2409	5.2876	5.3463	5.9446	5.9227	5.8183	5.579	5.9308
pos_407	Gln Leu Arg	metab_3381	yes	-	pos	-	416.262	2.60413	M+2H, M+H	C17H33N7O5	65	0	-	-	-	-	-	-	-	-	-	65	0	-	-	1.3441	1.3355	0.0001409	0.0005119	5.1187	5.2902	5.1401	5.3378	5.3449	5.7716	5.6297	5.7082	5.6519	5.9291
pos_414	Ile His Glu	metab_3458	yes	-	pos	-	398.203	2.57222	M+2H, M+H	C17H27N5O6	82.1	0	-	-	-	-	-	-	-	-	-	82.1	0	-	-	1.0034	0.9976	7.502e-06	5.21e-05	6.0427	5.951	5.9771	5.9	5.9152	5.6757	5.6919	5.6894	5.7056	5.7061
pos_417	Arg Phe	metab_3491	yes	-	pos	-	322.187	2.69222	M+2H, M+H	C15H23N5O3	72.6	0	-	-	-	-	-	-	-	-	-	72.6	0	-	-	1.3893	1.3801	1.013e-05	6.583e-05	5.0341	5.042	4.7991	4.8962	4.9675	5.5002	5.4353	5.3933	5.4122	5.5155
pos_4456	1-Carboxycyclohexaneacetic Acid	metab_3807	yes	-	pos	-	151.075	6.71877	M+H-2H2O	C9H14O4	73.3	0	-	-	-	-	-	-	-	-	-	73.3	0	-	-	1.3462	1.3316	4.503e-05	0.000208	4.9518	4.9921	5.0008	5.1628	5.2119	4.6725	4.4894	4.5785	4.5875	4.6164
pos_4641	14-(Hydroxymethyl)-5,9-dimethyltetracyclo[11.2.1.0~1,10~.0~4,9~]hexadecan-5-ol	metab_4012	yes	-	pos	-	293.247	6.41685	M+H	C19H32O2	45.3	0	-	-	-	-	-	-	-	-	-	45.3	0	-	-	1.7727	1.7506	0.0001708	0.0005925	5.3456	5.1376	5.163	5.2081	5.276	4.689	4.0955	4.3722	4.6203	4.1223
pos_473	Glu Ile	metab_4107	yes	-	pos	-	261.144	2.95345	M+H-H2O, M+H	C11H20N2O5	82.5	0	-	-	-	-	-	-	-	-	-	82.5	0	-	-	1.0544	1.0423	1.59e-07	7.486e-06	6.805	6.7756	6.7373	6.7303	6.7846	6.489	6.4972	6.4699	6.51	6.4623
pos_4784	Dehydrocholic Acid	metab_4167	yes	C13154	pos	81-23-2	385.237	6.24985	M+H-H2O	C24H34O5	59.7	0	LMST04010106;MJDBOTE0000546	-	-	-	-	-	-	-	-	59.7	0	-	-	1.2392	1.2373	0.01207	0.02104	4.9337	4.996	4.6204	4.8084	4.6134	4.4491	3.9744	4.3756	4.663	3.9784
[truncated: 73 more rows]
