# Supplementary material for: The microbiome- and metabolome-modulating activity of dietary cholesterol: insights from the small and large intestines
Source: Royal Society of Chemistry journal article supplement (doi:10.1039/d4fo03049d), 2025-01-01
Supplement: d4fo03049d8.xlsx [file d4fo03049d8.xlsx]

## Sheet: Supplementary Table S8
Table S8. Metabolites Significantly Altered in iSI_0 and iLI_0 Groups Based on Metabolomics
ID	Metabolite	Metab ID	P_value	FDR	VIP_pred_OPLS-DA	VIP_PLS-DA	FC(iSI_0/iLI_0)	Log2FC(iSI_0/iLI_0)	Significant	KEGG Compound ID	KEGG Compound First Category	KEGG Compound Second Category	KEGG Pathway ID	KEGG Pathway Description	KEGG Pathway First Category	KEGG Pathway Second Category	Library ID	HMDB Superclass	HMDB Class	HMDB Subclass	CAS ID	M/Z	Retention time	Adducts	Formula	Fragmentation Score	Theoretical Fragmentation Score	Mode
neg_4158	DG(15:0/18:3(9Z,12Z,15Z)/0:0)	metab_11251	3.93e-07	2.86e-06	2.5409	2.5251	0.0445	-4.4893	yes	C00165	-	-	map05214;map05167;map04650;map05163;map04750;map05235;map04015;map04014;map04659;map04540;map04010;map04012;map05022;map04370;map04371;map04072;map04071;map04975;map05143;map05012;map05231;map05146;map04919;map05200;map04961;map04745;map04921;map04920;map04923;map04925;map05017;map04625;map04929;map04726;map04725;map04724;map04723;map04722;map05223;map04720;map04666;map05170;map04664;map04658;map…	Glioma;Kaposi sarcoma-associated herpesvirus infection;Natural killer cell mediated cytotoxicity;Human cytomegalovirus infection;Inflammatory mediator regulation of TRP channels;PD-L1 expression and PD-1 checkpoint pathway in cancer;Rap1 signaling pathway;Ras signaling pathway;Th17 cell differentiation;Gap junction;MAPK signaling pathway;ErbB signaling pathway;Pathways of neurodegeneration - mult…	Human Diseases;Human Diseases;Organismal Systems;Human Diseases;Organismal Systems;Human Diseases;Environmental Information Processing;Environmental Information Processing;Organismal Systems;Cellular Processes;Environmental Information Processing;Environmental Information Processing;Human Diseases;Environmental Information Processing;Environmental Information Processing;Environmental Information …	Cancer: specific types;Infectious disease: viral;Immune system;Infectious disease: viral;Sensory system;Cancer: overview;Signal transduction;Signal transduction;Immune system;Cellular community - eukaryotes;Signal transduction;Signal transduction;Neurodegenerative disease;Signal transduction;Signal transduction;Signal transduction;Signal transduction;Digestive system;Infectious disease: parasitic…	HMDB0007076;PW_C003127	Lipids and lipid-like molecules	Fatty Acyls	Lineolic acids and derivatives	-	557.457	7.02312	M-H2O-H	C36H64O5	0	49.6	neg
pos_1124	28-Homobrassinolide	metab_140	1.12e-07	7.63e-07	2.5257	2.5168	0.1238	-3.0139	yes	-	-	-	-	-	-	-	HMDB0030423	Lipids and lipid-like molecules	Steroids and steroid derivatives	Steroid lactones	80483-89-2	477.357	6.59177	M+H-H2O, M+H	C29H50O6	0	33.9	pos
pos_3150	Arabinofuranosylcytosine	metab_2376	3.97e-15	1.25e-11	2.4574	2.4512	191.837	7.5837	yes	C02961	-	-	-	-	-	-	HMDB0015122;HMDB0248553	Nucleosides, nucleotides, and analogues	Pyrimidine nucleosides	Not Available	147-94-4	504.207	5.42647	2M+NH4	C9H13N3O5	0	40.4	pos
pos_24	1-Nitro-5-hydroxy-6-glutathionyl-5,6-dihydronaphthalene	metab_1546	4.21e-15	1.25e-11	2.4434	2.4376	4.2597	2.0908	yes	C14805	-	-	map00980	Metabolism of xenobiotics by cytochrome P450	Metabolism	Xenobiotics biodegradation and metabolism	HMDB0060327	Organic acids and derivatives	Carboxylic acids and derivatives	Amino acids, peptides, and analogues	-	497.134	4.20532	M+H, M+K, M+NH4, M+Na	C20H24N4O9S	0	64.2	pos
pos_6728	Serylproline	metab_6311	1.13e-14	1.68e-11	2.3703	2.3644	1971.86	10.9453	yes	-	-	-	-	-	-	-	HMDB0029047	Organic acids and derivatives	Carboxylic acids and derivatives	Amino acids, peptides, and analogues	23827-93-2	405.198	3.1052	2M+H	C8H14N2O4	0	35.8	pos
pos_5863	L-Pyroglutamyl-L-histidyl-3,3-dimethylprolinamide	metab_5354	4.09e-06	1.42e-05	2.3238	2.3103	0.0854	-3.5497	yes	-	-	-	-	-	-	-	HMDB0257369	Organic acids and derivatives	Carboxylic acids and derivatives	Amino acids, peptides, and analogues	-	355.186	4.49522	M+H-2H2O	C18H26N6O4	0	34.2	pos
neg_2262	Erinacine P	metab_9156	1.14e-13	9.24e-11	2.245	2.2399	128.147	7.0017	yes	-	-	-	-	-	-	-	HMDB0036313	Lipids and lipid-like molecules	Prenol lipids	Diterpenoids	291532-17-7	491.267	4.46347	M-H	C27H40O8	0	60.2	neg
pos_4545	LysoPA(22:5(7Z,10Z,13Z,16Z,19Z)/0:0)	metab_3906	1.12e-07	7.63e-07	2.2315	2.2139	2.9121	1.542	yes	-	-	-	-	-	-	-	HMDB0114754	Lipids and lipid-like molecules	Glycerophospholipids	Glycerophosphates	-	526.293	6.55998	M+ACN+H	C25H41O7P	0	70.4	pos
neg_1743	Canrenone	metab_8581	3.42e-13	1.56e-10	2.2296	2.2254	8.6792	3.1176	yes	-	-	-	-	-	-	-	HMDB0003033;HMDB0258427	Lipids and lipid-like molecules	Steroids and steroid derivatives	Steroid lactones	976-71-6	375.171	3.72183	M+Cl	C22H28O3	0	30.8	neg
pos_3731	LysoPS(18:0/0:0)	metab_3009	8.11e-13	2.11e-10	2.2263	2.2207	3.8473	1.9439	yes	-	-	-	-	-	-	-	HMDB0240606	Lipids and lipid-like molecules	Glycerophospholipids	Glycerophosphoserines	119786-67-3	526.314	7.11597	M+H	C24H48NO9P	0	75.6	pos
neg_5888	Sufentanil	metab_13167	2.22e-10	9.89e-09	2.2222	2.2201	14.7994	3.8875	yes	C08022	-	-	-	-	-	-	HMDB0014846;PW_C009183	Benzenoids	Benzene and substituted derivatives	Anilides	56030-54-7	421.173	4.47915	M+Cl	C22H30N2O2S	0	38	neg
neg_2614	Cyclocreatine	metab_9545	2.12e-08	2.84e-07	2.2073	2.2007	0.0574	-4.1228	yes	-	-	-	-	-	-	-	HMDB0250642	Organic acids and derivatives	Carboxylic acids and derivatives	Amino acids, peptides, and analogues	-	285.133	5.12498	2M-H	C5H9N3O2	0	31.7	neg
neg_6315	Ancymidol	metab_13639	1.21e-09	3.08e-08	2.2061	2.1988	0.0315	-4.9905	yes	C18774	-	-	-	-	-	-	HMDB0248390	Benzenoids	Phenol ethers	Anisoles	12771-68-5	301.12	3.95018	M+FA-H	C15H16N2O2	0	59.4	neg
pos_3281	2-(beta-D-Mannopyranosyl)-L-tryptophan	metab_2518	6.04e-11	3.56e-09	2.1966	2.1863	0.2016	-2.3101	yes	-	-	-	-	-	-	-	HMDB0258059	Organoheterocyclic compounds	Pyridines and derivatives	Phenylpyridines	-	349.139	5.84395	M+H-H2O	C17H22N2O7	0	80.3	pos
neg_731	Indole-3-acetyl-myo-inositol	metab_14739	3.81e-09	7.58e-08	2.1535	2.1451	0.1182	-3.0807	yes	C03868	-	-	-	-	-	-	HMDB0031182	Organoheterocyclic compounds	Indoles and derivatives	Indolyl carboxylic acids and derivatives	73925-84-5	336.109	4.35173	M-H, M+Na-2H	C16H19NO7	0	36.7	neg
neg_2049	6-Hydroxypseudooxynicotine	metab_8920	1.45e-12	4.4e-10	2.152	2.1482	7.376	2.8828	yes	C01297	-	-	map01100;map01120;map00760	Metabolic pathways;Microbial metabolism in diverse environments;Nicotinate and nicotinamide metabolism	Metabolism;Metabolism;Metabolism	Global and overview maps;Global and overview maps;Metabolism of cofactors and vitamins	HMDB0240264	Organic oxygen compounds	Organooxygen compounds	Carbonyl compounds	7424-35-3	447.228	4.11602	2M+Hac-H	C10H14N2O2	0	49.7	neg
pos_5414	Norchalciporyl propionate	metab_4862	1.39e-05	3.96e-05	2.1424	2.1368	3.5121	1.8123	yes	-	-	-	-	-	-	-	HMDB0029829	Organoheterocyclic compounds	Azepines	Not Available	112448-75-6	536.344	5.41047	2M+NH4	C16H21NO2	0	39.9	pos
pos_4409	Dihydrotachysterol	metab_3755	6.73e-12	7.54e-10	2.1408	2.1343	0.3825	-1.3865	yes	C06957	-	-	-	-	-	-	HMDB0015203	Lipids and lipid-like molecules	Steroids and steroid derivatives	Vitamin D and derivatives	67-96-9	462.368	6.79055	M+ACN+Na	C28H46O	0	53.2	pos
neg_2531	Deoxyartemsinin	metab_9453	2.54e-14	7.36e-11	2.1397	2.1342	7.4142	2.8903	yes	-	-	-	-	-	-	-	HMDB0060569	Organoheterocyclic compounds	Oxepanes	Not Available	-	303.102	4.97482	M+K-2H	C15H22O4	0	35.3	neg
pos_4540	LysoPE(22:6(4Z,7Z,10Z,13Z,16Z,19Z)/0:0)	metab_3901	9.77e-09	1.38e-07	2.1378	2.1228	3.5747	1.8378	yes	-	-	-	-	-	-	-	HMDB0011526	Lipids and lipid-like molecules	Glycerophospholipids	Glycerophosphoethanolamines	-	548.275	6.56792	M+Na	C27H44NO7P	0	91.2	pos
pos_2638	Alongside	metab_1809	1.23e-07	8.17e-07	2.1352	2.1276	0.0398	-4.6528	yes	-	-	-	-	-	-	-	HMDB0248179	Phenylpropanoids and polyketides	Macrolides and analogues	Not Available	-	225.112	3.9553	M+H	C12H16O4	0	52.4	pos
pos_2405	Hydroxyprolylhydroxyproline	metab_1553	1.49e-06	6.11e-06	2.125	2.1231	4.9264	2.3005	yes	-	-	-	-	-	-	-	HMDB0028864	Organic acids and derivatives	Carboxylic acids and derivatives	Amino acids, peptides, and analogues	21768-17-2	245.113	3.40008	M+H	C10H16N2O5	0	33.8	pos
pos_2738	Sulbactam	metab_1919	7.73e-05	0.0001745	2.0893	2.1006	4.2859	2.0996	yes	C07770	-	-	-	-	-	-	HMDB0258566	Organic acids and derivatives	Carboxylic acids and derivatives	Amino acids, peptides, and analogues	68373-14-8	275.069	4.20532	M+ACN+H	C8H11NO5S	0	50.5	pos
pos_2042	Milbemycin alpha5	metab_1155	4.61e-06	1.57e-05	2.0891	2.0715	3.2696	1.7091	yes	-	-	-	-	-	-	-	HMDB0254721;HMDB0242623;HMDB0254730;HMDB0254723	Phenylpropanoids and polyketides	Macrolides and analogues	Milbemycins	-	337.203	2.65198	M+2H	C38H56O10	0	44.1	pos
neg_4345	N-Oleoyl Cysteine	metab_11458	5.11e-10	1.66e-08	2.0619	2.0573	3.7569	1.9095	yes	-	-	-	-	-	-	-	HMDB0241957	Not Available	Not Available	Not Available	-	384.258	6.56238	M-H	C21H39NO3S	0	36.8	neg
pos_705	Pentoprilat	metab_6668	7.57e-08	5.79e-07	2.0392	2.0331	0.2181	-2.1967	yes	-	-	-	-	-	-	-	HMDB0256291	Organoheterocyclic compounds	Indoles and derivatives	Indolecarboxylic acids and derivatives	-	323.16	4.64772	M+NH4, M+CH3OH+H	C16H19NO5	0	83.9	pos
neg_7132	2-Amino-4-oxo-4-alpha-hydroxy-6-(erythro-1',2',3'-trihydroxypropyl)-5,6,7,8-tetrahydroxypterin	metab_14544	1.29e-12	4.14e-10	2.0296	2.0259	3.3181	1.7304	yes	C05252	-	-	-	-	-	-	HMDB0012143	Organoheterocyclic compounds	Pteridines and derivatives	Pterins and derivatives	-	356.059	3.06012	M+Cl	C9H15N5O8	0	32.4	neg
neg_5807	4-Hydroxy-3-prenylbenzoic acid glucoside	metab_13078	5.64e-06	2.25e-05	2.0275	2.0061	0.0995	-3.3286	yes	-	-	-	-	-	-	-	HMDB0039891	Organic oxygen compounds	Organooxygen compounds	Carbohydrates and carbohydrate conjugates	-	367.143	4.59687	M-H	C18H24O8	0	34.8	neg
neg_5024	Gamma-CEHC glucuronide	metab_12211	0.001232	0.002013	2.0093	2.0285	3.8376	1.9402	yes	-	-	-	-	-	-	-	HMDB0242175	Organic oxygen compounds	Organooxygen compounds	Carbohydrates and carbohydrate conjugates	-	485.167	5.79847	M+FA-H	C21H28O10	0	57.9	neg
pos_6030	Merafloxacin	metab_5541	0.0004223	0.0007815	2.0022	1.9733	4.0596	2.0214	yes	-	-	-	-	-	-	-	HMDB0254459	Organoheterocyclic compounds	Quinolines and derivatives	Quinoline carboxylic acids	-	397.208	4.18067	M+NH4	C19H23F2N3O3	0	42.7	pos
neg_6470	Cisapride	metab_13811	8.48e-14	9.03e-11	1.9865	1.9821	2.9185	1.5452	yes	C06910	-	-	-	-	-	-	HMDB0014742	Benzenoids	Benzene and substituted derivatives	Benzoic acids and derivatives	81098-60-4	446.168	3.793	M-H2O-H	C23H29ClFN3O4	0	47.5	neg
pos_5859	CDP-DG(20:5(6E,8Z,11Z,14Z,17Z)-OH(5)/i-20:0)	metab_5349	0.001441	0.002328	1.984	1.9478	3.7022	1.8884	yes	-	-	-	-	-	-	-	HMDB0294156	Not Available	Not Available	Not Available	-	536.782	4.50322	M+2H	C52H87N3O16P2	0	38.7	pos
neg_5644	Hydroxyprolyl-Valine	metab_12897	0.0003801	0.0007061	1.9816	1.9617	2.9305	1.5512	yes	-	-	-	-	-	-	-	HMDB0028876	Organic acids and derivatives	Carboxylic acids and derivatives	Amino acids, peptides, and analogues	-	459.246	4.85657	2M-H	C10H18N2O4	0	65.5	neg
neg_4308	N-Arachidonoyl Proline	metab_11417	2.44e-05	7.42e-05	1.9807	1.9624	2.5696	1.3616	yes	-	-	-	-	-	-	-	HMDB0242002	Not Available	Not Available	Not Available	-	400.286	6.61715	M-H	C25H39NO3	0	40.4	neg
pos_3447	Hexobarbital	metab_7725	2.15e-13	1.16e-10	1.9778	1.9735	2.2483	1.1689	yes	C11723	-	-	-	-	-	-	HMDB0253154;HMDB0015444	Organic oxygen compounds	Organooxygen compounds	Carbonyl compounds	56-29-1	514.265	6.17085	2M+ACN+H	C12H16N2O3	0	32.5	pos
neg_2477	Hexyl glucoside	metab_9392	0.0002296	0.0004632	1.9675	1.9478	0.1653	-2.5972	yes	-	-	-	-	-	-	-	HMDB0031688	Lipids and lipid-like molecules	Fatty Acyls	Fatty acyl glycosides	59080-45-4	285.134	4.8801	M+Na-2H	C12H24O6	0	38.4	neg
neg_2044	Octopine	metab_8915	8.29e-07	5.09e-06	1.9624	1.9507	0.2557	-1.9677	yes	C04137	-	-	map02010;map00330	ABC transporters;Arginine and proline metabolism	Environmental Information Processing;Metabolism	Membrane transport;Amino acid metabolism	HMDB0255912	Organic acids and derivatives	Carboxylic acids and derivatives	Amino acids, peptides, and analogues	34522-32-2	281.101	4.11602	M+Cl	C9H18N4O4	0	35.3	neg
pos_587	Fumonisin A2	metab_5361	7.38e-09	1.14e-07	1.9604	1.9529	2.4312	1.2817	yes	-	-	-	-	-	-	-	HMDB0034699	Organic acids and derivatives	Carboxylic acids and derivatives	Fumonisins	117415-47-1	374.707	3.67295	M+2H, M+H	C36H61NO15	0	51.9	pos
neg_4706	Epothilone A	metab_11858	0.0001187	0.0002682	1.9465	1.9413	3.0345	1.6015	yes	C12153	-	-	map01052	Type I polyketide structures	Metabolism	Metabolism of terpenoids and polyketides	HMDB0251873;LMPK04000040	Phenylpropanoids and polyketides	Macrolides and analogues	Epothilones and analogues	152044-53-6	492.243	6.04828	M-H	C26H39NO6S	0	52.7	neg
neg_5933	(4-Ethoxyphenyl)urea	metab_13218	0.0002719	0.0005324	1.9453	1.957	4.5931	2.1995	yes	C19415	-	-	-	-	-	-	HMDB0032565	Benzenoids	Benzene and substituted derivatives	N-phenylureas	150-69-6	419.194	4.4144	2M+Hac-H	C9H12N2O2	0	40.7	neg
neg_4855	Glycyl-prolyl-arginyl-valyl-valyl-glutamic acid	metab_12023	0.0008729	0.001479	1.9448	1.9215	2.2028	1.1393	yes	-	-	-	-	-	-	-	HMDB0252831	Organic acids and derivatives	Carboxylic acids and derivatives	Amino acids, peptides, and analogues	-	676.338	5.93142	M+Na-2H	C28H49N9O9	0	63	neg
pos_6663	Morroniside	metab_6240	1.36e-13	1.01e-10	1.9412	1.937	2.6015	1.3793	yes	C17000	-	-	-	-	-	-	HMDB0254897	Organic oxygen compounds	Organooxygen compounds	Carbohydrates and carbohydrate conjugates	25406-64-8	448.183	3.19342	M+ACN+H	C17H26O11	0	51.1	pos
neg_6702	Tropolone A	metab_14068	2.29e-13	1.21e-10	1.9326	1.9277	2.4905	1.3164	yes	-	-	-	-	-	-	-	HMDB0255800	Hydrocarbon derivatives	Tropones	Tropolones	-	466.204	3.54097	M+Cl	C24H33NO6	0	48	neg
pos_6767	3,4-Dihydroxyphenyl ethanol	metab_6354	6.24e-05	0.0001444	1.9261	1.9169	0.2093	-2.2564	yes	-	-	-	-	-	-	-	-	-	-	-	-	155.07	3.06492	M+H	C8H10O3	36	0	pos
neg_5695	N-(3-acetamidopropyl)pyrrolidin-2-one	metab_12953	1.78e-05	5.69e-05	1.9162	1.9041	2.4619	1.2998	yes	-	-	-	-	-	-	-	HMDB0061384	Organoheterocyclic compounds	Pyrrolidines	N-alkylpyrrolidines	106692-36-8	427.256	4.76547	2M+Hac-H	C9H16N2O2	0	63.1	neg
pos_5382	Cyclo(Leu-Phe)	metab_4826	0.0006365	0.001126	1.9145	1.9067	0.1484	-2.752	yes	C20519	-	-	-	-	-	-	HMDB0094673	Organic acids and derivatives	Carboxylic acids and derivatives	Amino acids, peptides, and analogues	-	261.159	5.48247	M+H	C15H20N2O2	0	83.1	pos
pos_6764	N6-Methyl-2'-deoxyadenosine	metab_6351	4.39e-05	0.0001067	1.9069	1.8933	0.4037	-1.3085	yes	C03795	-	-	-	-	-	-	HMDB0255300	Nucleosides, nucleotides, and analogues	Purine nucleosides	Purine 2''-deoxyribonucleosides	2002-35-9	248.114	3.06492	M+H-H2O	C11H15N5O3	0	78.5	pos
neg_714	(1R*,3R*,3'S*)-1,2,3,4-Tetrahydro-1-(2-thio-3-pyrrolidinyl)-beta-carboline-3-carboxylic acid	metab_14552	0.0007531	0.001298	1.9066	1.9216	3.3142	1.7286	yes	-	-	-	-	-	-	-	HMDB0034767	Alkaloids and derivatives	Harmala alkaloids	Not Available	-	314.099	4.72313	M-H2O-H, M-H	C16H17N3O2S	0	32.9	neg
pos_407	Gln Leu Arg	metab_3381	1.71e-08	2.08e-07	1.9042	1.9038	2.7567	1.4629	yes	-	-	-	-	-	-	-	-	-	-	-	-	416.262	2.60413	M+2H, M+H	C17H33N7O5	65	0	pos
pos_4704	Algestone	metab_4079	2.34e-05	6.19e-05	1.9033	1.8836	0.3186	-1.6503	yes	C06391	-	-	-	-	-	-	LMST02030171;HMDB0248134	Lipids and lipid-like molecules	Steroids and steroid derivatives	Pregnane steroids	595-77-7	379.247	6.33718	M+CH3OH+H	C21H30O4	0	61.2	pos
neg_2429	N4-Acetylaminobutanal	metab_9339	4.71e-05	0.0001257	1.9008	1.8884	2.9396	1.5556	yes	C05936	-	-	map01100;map00330	Metabolic pathways;Arginine and proline metabolism	Metabolism;Metabolism	Global and overview maps;Amino acid metabolism	HMDB0004226	Organic oxygen compounds	Organooxygen compounds	Carbonyl compounds	-	303.156	4.78017	2M+FA-H	C6H11NO2	0	33.1	neg
neg_1968	Garcinone D	metab_8830	1.21e-12	4.12e-10	1.8992	1.8955	2.5833	1.3692	yes	-	-	-	-	-	-	-	HMDB0033332	Organoheterocyclic compounds	Benzopyrans	1-benzopyrans	107390-08-9	463.151	4.02132	M+Cl	C24H28O7	0	38.7	neg
neg_5654	DHAP(O-18:0)	metab_12908	0.000969	0.001628	1.8946	1.9161	4.3058	2.1063	yes	-	-	-	-	-	-	-	HMDB0011142	Organic oxygen compounds	Organooxygen compounds	Carbonyl compounds	-	443.251	4.83355	M+Na-2H	C21H43O6P	0	43	neg
neg_2016	Allyl-isopropyl-acetylharnstoff	metab_8885	6.71e-06	2.59e-05	1.8914	1.8745	2.5903	1.3731	yes	-	-	-	-	-	-	-	HMDB0258084	Organic acids and derivatives	Organic carbonic acids and derivatives	Ureas	-	427.256	4.08403	2M+Hac-H	C9H16N2O2	0	30.6	neg
pos_959	(Z)-N-Hexadec-9-Enoyl-L-Phenylalanine	metab_7649	0.001025	0.001718	1.8909	1.8916	2.9171	1.5446	yes	-	-	-	-	-	-	-	-	-	-	-	-	402.3	6.79845	M+H, M+CH3OH+H	C25H39NO3	68.3	0	pos
pos_1429	S-(Formylmethyl)glutathione	metab_477	2.63e-13	1.3e-10	1.8815	1.8775	2.0423	1.0302	yes	C14871	-	-	map00980	Metabolism of xenobiotics by cytochrome P450	Metabolism	Xenobiotics biodegradation and metabolism	HMDB0060507	Organic acids and derivatives	Carboxylic acids and derivatives	Amino acids, peptides, and analogues	-	350.101	4.20532	M+H-H2O, M+H	C12H19N3O7S	0	70	pos
neg_2512	Simmondsin 2'-ferulate	metab_9432	6.41e-07	4.2e-06	1.8712	1.8757	3.6212	1.8565	yes	-	-	-	-	-	-	-	HMDB0035475	Phenylpropanoids and polyketides	Cinnamic acids and derivatives	Hydroxycinnamic acids and derivatives	179466-18-3	532.186	4.9356	M-H2O-H	C26H33NO12	0	52.3	neg
neg_2674	Beta-Guanidinopropionic acid	metab_9611	8.42e-05	0.0001998	1.8712	1.8695	0.1741	-2.5221	yes	C03065	-	-	-	-	-	-	HMDB0013222	Organic nitrogen compounds	Organonitrogen compounds	Guanidines	-	261.134	5.22158	2M-H	C4H9N3O2	0	35.7	neg
pos_1408	Val Leu Leu Gly Thr	metab_454	0.001342	0.002182	1.8706	1.8411	2.7856	1.478	yes	-	-	-	-	-	-	-	-	-	-	-	-	502.323	4.81707	M+H, M+Na	C23H43N5O7	37.8	0	pos
pos_5297	17-O-acetylnorajmaline	metab_4731	1.12e-07	7.63e-07	1.8701	1.8718	0.4188	-1.2558	yes	C11809	-	-	map01110;map00901	Biosynthesis of secondary metabolites;Indole alkaloid biosynthesis	Metabolism;Metabolism	Global and overview maps;Biosynthesis of other secondary metabolites	HMDB0304031	Alkaloids and derivatives	Ajmaline-sarpagine alkaloids	Not Available	-	418.212	5.68348	M+ACN+Na	C21H26N2O3	0	70.2	pos
pos_5279	MG(0:0/i-18:0/0:0)	metab_4712	4.67e-05	0.0001122	1.8675	1.854	0.2524	-1.9864	yes	-	-	-	-	-	-	-	HMDB0072877	Lipids and lipid-like molecules	Glycerolipids	Monoradylglycerols	-	397.269	5.72348	M+K	C21H42O4	0	67.2	pos
pos_162	1-Tert-Butyl 4-ethyl 3-oxopiperidine-1,4-dicarboxylate	metab_689	0.0001373	0.0002907	1.8649	1.8547	0.1472	-2.7644	yes	-	-	-	-	-	-	-	HMDB0247311	Organoheterocyclic compounds	Piperidines	Piperidinecarboxylic acids and derivatives	-	272.149	5.33777	M+H, M+Na, M+H-H2O	C13H21NO5	0	31.9	pos
neg_344	1-Nitro-7-glutathionyl-8-hydroxy-7,8-dihydronaphthalene	metab_10457	5.88e-06	2.33e-05	1.8562	1.8644	1.978	0.9841	yes	C14804	-	-	map00980	Metabolism of xenobiotics by cytochrome P450	Metabolism	Xenobiotics biodegradation and metabolism	HMDB0060329	Benzenoids	Naphthalenes	Not Available	-	495.119	4.72313	M-H, 2M-H	C20H24N4O9S	0	61.8	neg
neg_2354	(-)-Salsoline	metab_9258	0.0002449	0.0004892	1.8488	1.8234	2.7883	1.4794	yes	C09640	-	-	-	-	-	-	HMDB0003626;HMDB0012469	Organoheterocyclic compounds	Tetrahydroisoquinolines	Not Available	89-31-6;53622-84-7	431.215	4.6258	2M+FA-H	C11H15NO2	0	32.8	neg
pos_2029	Phenylalanyllysine	metab_1140	0.0002041	0.0004098	1.8475	1.8498	3.8806	1.9563	yes	-	-	-	-	-	-	-	HMDB0029000	Organic acids and derivatives	Carboxylic acids and derivatives	Amino acids, peptides, and analogues	6456-72-0	294.181	2.61212	M+H	C15H23N3O3	0	70.5	pos
pos_7483	4-Trimethylammoniobutanoic Acid	metab_7140	1.13e-07	7.68e-07	1.8474	1.8365	0.5152	-0.9568	yes	C01181	-	-	map01100;map00310;map02010	Metabolic pathways;Lysine degradation;ABC transporters	Metabolism;Metabolism;Environmental Information Processing	Global and overview maps;Amino acid metabolism;Membrane transport	PW_C000899;HMDB0001161	Lipids and lipid-like molecules	Fatty Acyls	Fatty acids and conjugates	407-64-7	146.118	0.9301	M+H	C7H15NO2	53.4	0	pos
pos_4080	Eriojaposide B	metab_3393	0.0001694	0.0003485	1.8453	1.8653	2.2253	1.154	yes	C17889	-	-	-	-	-	-	HMDB0038029	Lipids and lipid-like molecules	Fatty Acyls	Fatty acyl glycosides	351412-97-0	534.296	7.72757	M+NH4	C25H40O11	0	64.4	pos
pos_2734	7-Hydroxytrideca-9,11-dienoylcarnitine	metab_1915	3.01e-09	5.76e-08	1.8421	1.8392	0.3737	-1.4199	yes	-	-	-	-	-	-	-	HMDB0241335	Lipids and lipid-like molecules	Fatty Acyls	Fatty acid esters	-	402.285	4.1893	M+CH3OH+H	C20H35NO5	0	40.8	pos
pos_2907	DG(i-12:0/20:4(7E,9E,11Z,13E)-3OH(5S,6R,15S)/0:0)	metab_2105	2.16e-05	5.79e-05	1.841	1.8211	2.8111	1.4912	yes	-	-	-	-	-	-	-	HMDB0298390	Not Available	Not Available	Not Available	-	327.202	4.67972	M+2Na	C35H60O8	0	59.2	pos
neg_3206	Gallopamil	metab_10199	5.19e-11	3.79e-09	1.8407	1.8375	2.0965	1.068	yes	C13764	-	-	-	-	-	-	HMDB0252599	Benzenoids	Benzene and substituted derivatives	Phenylbutylamines	16662-47-8	1013.58	6.0561	2M+FA-H	C28H40N2O5	0	80.5	neg
pos_2532	Trans-zeatin riboside	metab_1694	5.62e-13	1.85e-10	1.8399	1.8356	2.3727	1.2465	yes	C16431	-	-	map01110;map00908	Biosynthesis of secondary metabolites;Zeatin biosynthesis	Metabolism;Metabolism	Global and overview maps;Metabolism of terpenoids and polyketides	HMDB0304506;HMDB0030388	Nucleosides, nucleotides, and analogues	Purine nucleosides	Not Available	6025-53-2	415.171	3.68145	M+ACN+Na	C15H21N5O5	0	37.8	pos
pos_5420	6-Hydroxymelatonin glucuronide	metab_4869	1.76e-07	1.09e-06	1.839	1.831	2.8958	1.534	yes	-	-	-	-	-	-	-	HMDB0060786	Organic oxygen compounds	Organooxygen compounds	Carbohydrates and carbohydrate conjugates	-	457.183	5.40247	M+CH3OH+H	C19H24N2O9	0	54.6	pos
pos_3536	Scymnol	metab_2796	2.7e-07	1.51e-06	1.838	1.8254	0.5645	-0.8249	yes	C16260	-	-	-	-	-	-	LMST04030173;HMDB0258186	Lipids and lipid-like molecules	Steroids and steroid derivatives	Bile acids, alcohols and derivatives	6785-34-8	433.331	6.40085	M+H-2H2O	C27H48O6	0	60.9	pos
pos_5078	S-(PGJ2)-glutathione	metab_4490	5.59e-10	1.71e-08	1.8342	1.8297	0.4918	-1.0238	yes	-	-	-	-	-	-	-	HMDB0013063	Organic acids and derivatives	Carboxylic acids and derivatives	Amino acids, peptides, and analogues	-	659.328	5.99563	M+NH4	C30H47N3O10S	0	52.5	pos
pos_2826	6-Epi-7-isocucurbic acid glucoside	metab_2016	5.23e-06	1.75e-05	1.832	1.8361	2.484	1.3126	yes	-	-	-	-	-	-	-	HMDB0029782	Lipids and lipid-like molecules	Fatty Acyls	Fatty acyl glycosides	176486-13-8	407.226	4.43052	M+CH3OH+H	C18H30O8	0	73.2	pos
neg_6725	Furanone A	metab_14093	4.61e-05	0.0001235	1.8259	1.8119	0.3617	-1.4673	yes	C17602	-	-	-	-	-	-	HMDB0094691	Organoheterocyclic compounds	Dihydrofurans	Furanones	-	213.04	3.52528	2M+FA-H	C4H4O2	0	37.8	neg
neg_7146	5-Amino-6-ribitylamino uracil	metab_14559	6.53e-06	2.54e-05	1.8228	1.818	1.9669	0.9759	yes	C04732	-	-	map01100;map01110;map01120;map01240;map00680;map00740	Metabolic pathways;Biosynthesis of secondary metabolites;Microbial metabolism in diverse environments;Biosynthesis of cofactors;Methane metabolism;Riboflavin metabolism	Metabolism;Metabolism;Metabolism;Metabolism;Metabolism;Metabolism	Global and overview maps;Global and overview maps;Global and overview maps;Global and overview maps;Energy metabolism;Metabolism of cofactors and vitamins	HMDB0011106	Organic oxygen compounds	Organooxygen compounds	Carbohydrates and carbohydrate conjugates	17014-74-3	313.053	2.89692	M+K-2H	C9H16N4O6	0	55.2	neg
pos_5878	Hordatine A	metab_5370	5.05e-05	0.0001202	1.818	1.7941	2.5234	1.3354	yes	C08307	-	-	-	-	-	-	HMDB0030461	Phenylpropanoids and polyketides	2-arylbenzofuran flavonoids	Not Available	7073-64-5	531.277	4.4632	M+H-2H2O	C28H38N8O5	0	39.6	pos
pos_4961	4-(Methylnitrosamino)-1-(3-pyridyl)-1-butanol	metab_4363	2.56e-05	6.7e-05	1.8051	1.7981	0.4264	-1.2296	yes	C19574	-	-	map05204;map00980	Chemical carcinogenesis - DNA adducts;Metabolism of xenobiotics by cytochrome P450	Human Diseases;Metabolism	Cancer: overview;Xenobiotics biodegradation and metabolism	HMDB0041809	Organoheterocyclic compounds	Pyridines and derivatives	Not Available	76014-81-8	436.269	6.08332	2M+NH4	C10H15N3O2	0	54.3	pos
neg_4239	Epothilone B	metab_11341	1.22e-08	1.86e-07	1.7966	1.7945	2.3679	1.2436	yes	C12154	-	-	-	-	-	-	LMPK04000041;HMDB0251874	Phenylpropanoids and polyketides	Macrolides and analogues	Epothilones and analogues	152044-54-7	528.242	6.73443	M+Na-2H	C27H41NO6S	0	45.7	neg
pos_6507	PC(6 keto-PGF1alpha/18:2(9Z,12Z))	metab_6070	6.66e-11	3.83e-09	1.7962	1.7882	2.0364	1.026	yes	-	-	-	-	-	-	-	HMDB0286548	Not Available	Not Available	Not Available	-	447.774	3.42407	M+H+Na	C46H82NO12P	0	47.5	pos
neg_2915	Sedanonic acid	metab_9878	6.8e-07	4.41e-06	1.7961	1.7821	0.2487	-2.0078	yes	-	-	-	-	-	-	-	HMDB0032871	Organic acids and derivatives	Keto acids and derivatives	Gamma-keto acids and derivatives	6697-07-0	255.124	5.6461	M+FA-H	C12H18O3	0	39.3	neg
pos_6037	Alminoprofen	metab_5548	7.19e-10	2.07e-08	1.7954	1.7927	1.8389	0.8789	yes	-	-	-	-	-	-	-	HMDB0248170	Phenylpropanoids and polyketides	Phenylpropanoic acids	Not Available	-	480.282	4.14865	2M+ACN+H	C13H17NO2	0	37.1	pos
pos_5383	PA(20:4(6E,8Z,11Z,14Z)-OH(5S)/8:0)	metab_4827	2.89e-05	7.43e-05	1.7947	1.7952	0.4665	-1.0999	yes	-	-	-	-	-	-	-	HMDB0266594	Not Available	Not Available	Not Available	-	639.302	5.47447	M+K	C31H53O9P	0	63	pos
pos_3213	Gemfibrozil 1-O-beta-Glucuronide	metab_2445	1.19e-05	3.48e-05	1.793	1.7981	0.4121	-1.2789	yes	-	-	-	-	-	-	-	HMDB0247652	Organic oxygen compounds	Organooxygen compounds	Carbohydrates and carbohydrate conjugates	-	459.223	5.63553	M+CH3OH+H	C21H30O9	0	33.2	pos
pos_5475	6-Dehydrotestosterone glucuronide	metab_4927	0.001831	0.002878	1.7874	1.7749	2.6439	1.4027	yes	C00178	Nucleic acids	Bases	map00240;map01100	Pyrimidine metabolism;Metabolic pathways	Metabolism;Metabolism	Nucleotide metabolism;Global and overview maps	HMDB0010337	Organoheterocyclic compounds	Diazines	Pyrimidines and pyrimidine derivatives	-	427.208	5.29777	M+H-2H2O	C25H34O8	0	51.5	pos
pos_1428	Precarthamin	metab_476	8.19e-13	2.11e-10	1.7855	1.7819	1.857	0.893	yes	-	-	-	-	-	-	-	HMDB0031967	Phenylpropanoids and polyketides	Flavonoids	Flavonoid glycosides	102716-32-5	453.144	4.20532	M+H, M+Na	C21H24O11	0	30.2	pos
pos_6721	Arphamenine B	metab_6305	1.21e-05	3.51e-05	1.7844	1.7771	1.9324	0.9504	yes	-	-	-	-	-	-	-	HMDB0248615	Organic acids and derivatives	Carboxylic acids and derivatives	Amino acids, peptides, and analogues	-	369.213	3.1132	M+CH3OH+H	C16H24N4O4	0	41.3	pos
pos_6172	(3S,5R,6S,7E,9x)-7-Megastigmene-3,6,9-triol 9-glucoside	metab_5698	6.11e-13	1.91e-10	1.7776	1.7718	1.8956	0.9227	yes	-	-	-	-	-	-	-	LMFA13010057;HMDB0041176	Lipids and lipid-like molecules	Fatty Acyls	Fatty acyl glycosides	-	423.26	3.9473	M+CH3OH+H	C19H34O8	0	46.2	pos
pos_5216	Grazoprevir	metab_4643	8.54e-10	2.33e-08	1.7757	1.7702	1.9041	0.9291	yes	-	-	-	-	-	-	-	HMDB0252939	Organic acids and derivatives	Carboxylic acids and derivatives	Amino acids, peptides, and analogues	-	767.35	5.83597	M+H	C38H50N6O9S	0	36.7	pos
pos_472	Leukotriene E3	metab_4096	0.0006749	0.001185	1.7742	1.7809	1.8311	0.8727	yes	-	-	-	-	-	-	-	LMFA03020074;HMDB0002355	Lipids and lipid-like molecules	Fatty Acyls	Eicosanoids	79494-05-6	442.266	2.93752	M+H, M+Na	C23H39NO5S	0	33.1	pos
pos_2526	Aldosterone 18-glucuronide	metab_1687	2.04e-09	4.37e-08	1.7733	1.7714	2.132	1.0922	yes	C03033	-	-	map01100;map00040;map04976;map00053;map01240	Metabolic pathways;Pentose and glucuronate interconversions;Bile secretion;Ascorbate and aldarate metabolism;Biosynthesis of cofactors	Metabolism;Metabolism;Organismal Systems;Metabolism;Metabolism	Global and overview maps;Carbohydrate metabolism;Digestive system;Carbohydrate metabolism;Global and overview maps	LMST05010062;HMDB0010345	Lipids and lipid-like molecules	Steroids and steroid derivatives	Steroidal glycosides	3604-86-2	578.261	3.66497	M+ACN+H	C27H36O11	0	60.7	pos
pos_1622	Glycerophosphocholine	metab_692	3.46e-05	8.69e-05	1.7717	1.7741	1.7716	0.825	yes	C00670	-	-	map00565;map00564;map05231	Ether lipid metabolism;Glycerophospholipid metabolism;Choline metabolism in cancer	Metabolism;Metabolism;Human Diseases	Lipid metabolism;Lipid metabolism;Cancer: overview	HMDB0008425;HMDB0007962;HMDB0008194;HMDB0008524;HMDB0011222;HMDB0008358;HMDB0008488;HMDB0008161;HMDB0008490;HMDB0008523;HMDB0008489;HMDB0008357;HMDB0008588;HMDB0008818;HMDB0008061;HMDB0008360;HMDB0008325;HMDB0008817;HMDB0007931;HMDB0008259;HMDB0008687;HMDB0008718;HMDB0008587;HMDB0008094;HMDB0008721;HMDB0008653;HMDB0008030;HMDB0008063;HMDB0008787;HMDB0008227;HMDB0008261;HMDB0008226;HMDB0007928;HMD…	Lipids and lipid-like molecules	Glycerophospholipids	Glycerophosphocholines	28319-77-9	258.11	0.953583	M+H, M+NH4	C8H20NO6P	51.7	0	pos
pos_7380	Adenine	metab_7030	1.04e-06	4.59e-06	1.7711	1.7675	0.578	-0.791	yes	C00147	Nucleic acids	Bases	map01100;map00230;map00908	Metabolic pathways;Purine metabolism;Zeatin biosynthesis	Metabolism;Metabolism;Metabolism	Global and overview maps;Nucleotide metabolism;Metabolism of terpenoids and polyketides	PW_C000024;HMDB0000034;MJDBOTE0000759	Organoheterocyclic compounds	Imidazopyrimidines	Purines and purine derivatives	73-24-5	136.062	1.29452	M+H	C5H5N5	67.1	0	pos
pos_3314	Norcapsaicin	metab_2555	2.5e-06	9.39e-06	1.7623	1.7647	0.4476	-1.1596	yes	-	-	-	-	-	-	-	HMDB0036327	Benzenoids	Phenols	Methoxyphenols	61229-08-1	621.328	5.90782	2M+K	C17H25NO3	0	37.5	pos
pos_5963	PIP(5-iso PGF2VI/22:3(10Z,13Z,16Z))	metab_5465	1.83e-07	1.11e-06	1.7554	1.7532	1.8767	0.9082	yes	-	-	-	-	-	-	-	HMDB0280328	Not Available	Not Available	Not Available	-	538.264	4.30202	M+H+Na	C50H86O19P2	0	64.5	pos
pos_4069	(2-Hydroxy-3-phosphonooxypropyl) octadec-9-enoate	metab_3380	1.81e-06	7.16e-06	1.7548	1.7581	2.187	1.1289	yes	-	-	-	-	-	-	-	HMDB0242470	Lipids and lipid-like molecules	Glycerophospholipids	Glycerophosphates	-	478.293	7.7515	M+ACN+H	C21H41O7P	0	54.3	pos
neg_1736	Leukotriene D4	metab_8573	4.72e-12	7.99e-10	1.7541	1.7496	2.1588	1.1102	yes	C05951	Lipids	Eicosanoids	map00590;map01100;map04080;map04664;map05310	Arachidonic acid metabolism;Metabolic pathways;Neuroactive ligand-receptor interaction;Fc epsilon RI signaling pathway;Asthma	Metabolism;Metabolism;Environmental Information Processing;Organismal Systems;Human Diseases	Lipid metabolism;Global and overview maps;Signaling molecules and interaction;Immune system;Immune disease	HMDB0244369;PW_C001775;HMDB0003080;LMFA03020006	Lipids and lipid-like molecules	Fatty Acyls	Eicosanoids	73836-78-9	495.257	3.70615	M-H	C25H40N2O6S	0	34.5	neg
pos_7155	5-Aminopentanal	metab_6785	3.59e-06	1.27e-05	1.7507	1.7409	0.5443	-0.8774	yes	C12455	-	-	map01100;map00960;map00310;map01110;map01120	Metabolic pathways;Tropane, piperidine and pyridine alkaloid biosynthesis;Lysine degradation;Biosynthesis of secondary metabolites;Microbial metabolism in diverse environments	Metabolism;Metabolism;Metabolism;Metabolism;Metabolism	Global and overview maps;Biosynthesis of other secondary metabolites;Amino acid metabolism;Global and overview maps;Global and overview maps	HMDB0012815	Organic oxygen compounds	Organooxygen compounds	Carbonyl compounds	-	244.202	2.58815	2M+ACN+H	C5H11NO	0	46.1	pos
pos_6393	Nalmefene	metab_5943	5.71e-12	6.64e-10	1.7496	1.7451	2.3495	1.2323	yes	C08027	-	-	-	-	-	-	HMDB0255432	Benzenoids	Phenanthrenes and derivatives	Not Available	55096-26-9	403.198	3.5926	M+ACN+Na	C21H25NO3	0	41.3	pos
pos_5174	Chenodeoxycholyltryptophan	metab_4597	0.001932	0.003013	1.7493	1.7481	0.3968	-1.3335	yes	-	-	-	-	-	-	-	HMDB0242395	Lipids and lipid-like molecules	Steroids and steroid derivatives	Bile acids, alcohols and derivatives	-	623.343	5.8998	M+2Na-H	C35H50N2O5	0	53.3	pos
pos_3341	Pisumoside B	metab_2585	2.12e-09	4.48e-08	1.7479	1.7424	0.5648	-0.8243	yes	-	-	-	-	-	-	-	HMDB0037125	Lipids and lipid-like molecules	Prenol lipids	Terpene glycosides	333334-43-3	657.313	5.94782	M+H-2H2O	C32H52O16	0	31	pos
neg_4306	3beta,7alpha-Dihydroxy-5-cholestenoate	metab_11415	1.04e-07	1.02e-06	1.747	1.7399	0.5884	-0.7651	yes	C17335	-	-	map00120	Primary bile acid biosynthesis	Metabolism	Lipid metabolism	HMDB0012454;PW_C007981	Lipids and lipid-like molecules	Steroids and steroid derivatives	Bile acids, alcohols and derivatives	115538-84-6	431.316	6.61715	M-H	C27H44O4	0	66	neg
pos_5709	PS(15:0/PGJ2)	metab_5184	2.89e-13	1.31e-10	1.7463	1.7421	2.0818	1.0578	yes	-	-	-	-	-	-	-	HMDB0281038	Not Available	Not Available	Not Available	-	411.729	4.82507	M+H+Na	C41H70NO12P	0	50.2	pos
pos_409	DG(PGF2alpha/2:0/0:0)	metab_3403	1.52e-06	6.22e-06	1.7454	1.7429	1.7734	0.8265	yes	-	-	-	-	-	-	-	HMDB0296916	Not Available	Not Available	Not Available	-	471.293	2.62005	M+2H, M+H	C25H42O8	0	43	pos
pos_2758	Capsianoside V	metab_1941	3.23e-12	4.69e-10	1.7439	1.7403	2.0054	1.0039	yes	-	-	-	-	-	-	-	HMDB0030737	Lipids and lipid-like molecules	Prenol lipids	Terpene glycosides	121924-06-9	532.312	4.26132	M+NH4	C26H42O10	0	44.5	pos
neg_1858	LysoPE(0:0/20:3(11Z,14Z,17Z))	metab_8708	3.91e-10	1.44e-08	1.7321	1.7265	1.9909	0.9935	yes	-	-	-	-	-	-	-	HMDB0011484	Lipids and lipid-like molecules	Glycerophospholipids	Glycerophosphoethanolamines	-	524.272	3.87193	M+Na-2H	C25H46NO7P	0	47.8	neg
pos_5367	2beta-Hydroxytestosterone	metab_4809	5.81e-08	4.75e-07	1.7306	1.717	0.4376	-1.1923	yes	C00550	Lipids	Phospholipids	map00600;map01100;map04071;map04217	Sphingolipid metabolism;Metabolic pathways;Sphingolipid signaling pathway;Necroptosis	Metabolism;Metabolism;Environmental Information Processing;Cellular Processes	Lipid metabolism;Global and overview maps;Signal transduction;Cell growth and death	HMDB0012654	Lipids and lipid-like molecules	Sphingolipids	Phosphosphingolipids	10390-14-4	349.175	5.53112	M+2Na-H	C19H28O3	0	67.9	pos
neg_2409	5,6-epoxy,18R-HEPE	metab_9317	7.66e-08	7.87e-07	1.7269	1.7243	0.4729	-1.0804	yes	C18175	-	-	-	-	-	-	HMDB0062410	Lipids and lipid-like molecules	Fatty Acyls	Fatty alcohols	-	353.172	4.73832	M+Na-2H	C20H28O4	0	60.2	neg
neg_5641	Prostaglandin J2	metab_15388	7.16e-07	4.56e-06	1.7258	1.7203	0.4301	-1.2172	yes	C05957	Lipids	Eicosanoids	map00590;map01100;map04726	Arachidonic acid metabolism;Metabolic pathways;Serotonergic synapse	Metabolism;Metabolism;Organismal Systems	Lipid metabolism;Global and overview maps;Nervous system	HMDB0002710;HMDB0004238;HMDB0247117;PW_C001687;LMFA03010019	Lipids and lipid-like molecules	Fatty Acyls	Eicosanoids	87893-54-7;60203-57-8	355.187	4.86442	M+Na-2H	C20H30O4	0	51.6	neg
neg_1237	Gly-pro-arg-pro	metab_8020	7.87e-05	0.0001895	1.7217	1.726	1.7622	0.8173	yes	-	-	-	-	-	-	-	HMDB0252829	Organic acids and derivatives	Carboxylic acids and derivatives	Amino acids, peptides, and analogues	-	460.205	2.64608	M+Cl	C18H31N7O5	0	51.8	neg
neg_6093	N-Formyl-met-leu-phe-lys	metab_13395	1.71e-06	8.84e-06	1.7186	1.7093	1.8109	0.8567	yes	-	-	-	-	-	-	-	HMDB0252432	Organic acids and derivatives	Carboxylic acids and derivatives	Amino acids, peptides, and analogues	-	600.264	4.19432	M+Cl	C27H43N5O6S	0	75.8	neg
neg_5649	(24E)-3alpha-Acetoxy-15alpha-hydroxy-23-oxo-7,9(11),24-lanostatrien-26-oic acid	metab_12902	5.78e-10	1.79e-08	1.7146	1.7105	2.2586	1.1754	yes	-	-	-	-	-	-	-	HMDB0035386	Lipids and lipid-like molecules	Prenol lipids	Diterpenoids	117383-37-6	547.3	4.84137	M+Na-2H	C32H46O6	0	44.3	neg
neg_1573	Gibberellin A8	metab_8392	3.79e-06	1.65e-05	1.7118	1.7006	0.4879	-1.0354	yes	C03579	-	-	map00904	Diterpenoid biosynthesis	Metabolism	Metabolism of terpenoids and polyketides	HMDB0303450;LMPR0104170005	Lipids and lipid-like molecules	Prenol lipids	Diterpenoids	7044-72-6	401.102	3.50913	M+K-2H	C19H24O7	0	50.7	neg
pos_6322	Myrigalone A	metab_5865	9.14e-09	1.32e-07	1.7107	1.6997	1.7995	0.8476	yes	-	-	-	-	-	-	-	HMDB0037245	Lipids and lipid-like molecules	Prenol lipids	Monoterpenoids	34328-57-9	642.31	3.68943	2M+ACN+H	C18H20O4	0	32.7	pos
neg_6782	Histidylvaline	metab_14155	1.2e-06	6.74e-06	1.7105	1.7011	0.4641	-1.1075	yes	-	-	-	-	-	-	-	HMDB0028898	Organic acids and derivatives	Carboxylic acids and derivatives	Amino acids, peptides, and analogues	76019-15-3	275.114	3.46995	M+Na-2H	C11H18N4O3	0	55.7	neg
neg_6296	PC(20:5(7Z,9Z,11E,13E,17Z)-3OH(5,6,15)/2:0)	metab_13617	3.19e-12	6.36e-10	1.7104	1.7058	1.9062	0.9307	yes	-	-	-	-	-	-	-	HMDB0288873	Not Available	Not Available	Not Available	-	630.31	3.96585	M-H	C30H50NO11P	0	75.1	neg
pos_2687	L-Thyronine	metab_1862	1.37e-05	3.9e-05	1.71	1.6913	0.3744	-1.4174	yes	-	-	-	-	-	-	-	HMDB0000667	Organic acids and derivatives	Carboxylic acids and derivatives	Amino acids, peptides, and analogues	1596-67-4	315.137	4.05197	M+ACN+H	C15H15NO4	0	54.2	pos
pos_3842	PC(17:0/0:0)	metab_3129	3.24e-12	4.69e-10	1.7087	1.7045	1.7596	0.8152	yes	C04230	Lipids	Phospholipids	map00564;map05231	Glycerophospholipid metabolism;Choline metabolism in cancer	Metabolism;Human Diseases	Lipid metabolism;Cancer: overview	LMGP01050024;HMDB0012108	Lipids and lipid-like molecules	Glycerophospholipids	Glycerophosphocholines	50930-23-9	532.337	7.66415	M+Na	C25H52NO7P	69.4	0	pos
pos_1391	3-methyl-2-Quinoxalinone	metab_435	4.2e-08	3.85e-07	1.7077	1.7032	0.5198	-0.944	yes	-	-	-	-	-	-	-	-	-	-	-	-	338.159	5.27377	M+H, 2M+NH4	C9H8N2O	59.6	0	pos
pos_6018	Nocardicin A	metab_5527	3.09e-12	4.69e-10	1.7064	1.7034	1.7796	0.8315	yes	C01941	Antibiotics	beta-Lactams	map01100;map01110;map07012;map00261	Metabolic pathways;Biosynthesis of secondary metabolites;Cephalosporins - parenteral agents;Monobactam biosynthesis	Metabolism;Metabolism;Drug Development;Metabolism	Global and overview maps;Global and overview maps;Chronology: Antiinfectives;Biosynthesis of other secondary metabolites	HMDB0255683	Organoheterocyclic compounds	Lactams	Beta lactams	39391-39-4	542.192	4.20532	M+ACN+H	C23H24N4O9	0	33.5	pos
neg_5860	Dihydroergocryptine	metab_13137	1.16e-10	6.06e-09	1.7022	1.6969	1.9016	0.9272	yes	-	-	-	-	-	-	-	HMDB0251310	Lipids and lipid-like molecules	Steroids and steroid derivatives	Steroid lactones	-	612.3	4.5145	M+Cl	C32H43N5O5	0	48.3	neg
pos_4494	Ercalcitriol	metab_3849	2.67e-10	1.01e-08	1.7018	1.695	0.6264	-0.6749	yes	-	-	-	-	-	-	-	HMDB0006225	Lipids and lipid-like molecules	Steroids and steroid derivatives	Vitamin D and derivatives	60133-18-8	461.362	6.63155	M+CH3OH+H	C28H44O3	0	55.8	pos
neg_4781	5-(6-Hydroxy-3,7-dimethyl-2,7-octadienyloxy)-7-methoxycoumarin	metab_11941	1.51e-06	8e-06	1.7018	1.6922	0.5424	-0.8826	yes	-	-	-	-	-	-	-	HMDB0032955	Phenylpropanoids and polyketides	Coumarins and derivatives	Not Available	40520-59-0	381.113	5.97835	M+K-2H	C20H24O5	0	31.8	neg
neg_7111	Tryptophan glutamate	metab_14521	0.0001294	0.0002869	1.699	1.7085	1.9927	0.9947	yes	-	-	-	-	-	-	-	HMDB0259308	Organic acids and derivatives	Carboxylic acids and derivatives	Amino acids, peptides, and analogues	-	348.123	3.15415	M-H	C16H19N3O6	0	73.5	neg
neg_2595	6,7,12,13-Tetrahydro-5H-indolo[2,3-a]pyrrolo[3,4-c]carbazol-5-one	metab_9523	4.97e-05	0.0001312	1.6948	1.6872	2.3045	1.2045	yes	-	-	-	-	-	-	-	HMDB0260295	Organoheterocyclic compounds	Indoles and derivatives	Carbazoles	-	346.078	5.08628	M+Cl	C20H13N3O	0	46.6	neg
pos_3191	7alpha-hydroxy-3-oxochol-4-en-24-oic Acid	metab_2421	0.008202	0.01121	1.6941	1.6715	0.0025	-8.6161	yes	-	-	-	-	-	-	-	HMDB0062744;LMST04010239	Lipids and lipid-like molecules	Steroids and steroid derivatives	Bile acids, alcohols and derivatives	14772-95-3	411.249	5.5471	M+Na	C24H36O4	0	69.5	pos
neg_3489	Tetradecadienyl-l-carnitine	metab_10510	0.001199	0.001964	1.6935	1.7093	2.555	1.3533	yes	-	-	-	-	-	-	-	HMDB0258883	Lipids and lipid-like molecules	Fatty Acyls	Fatty acids and conjugates	-	374.27	6.60152	M+Na-2H	C21H39NO3	0	35.9	neg
pos_6678	Demethylsuberosin	metab_6256	2.26e-06	8.61e-06	1.6925	1.6905	1.8807	0.9113	yes	C18083	-	-	map01061	Biosynthesis of phenylpropanoids	Metabolism	Chemical structure transformation maps	HMDB0304330	Phenylpropanoids and polyketides	Coumarins and derivatives	Hydroxycoumarins	21422-04-8	269.059	3.17705	M+K	C14H14O3	0	49.7	pos
neg_4707	Vorapaxar	metab_11859	2.74e-05	8.17e-05	1.6923	1.6936	0.5213	-0.9399	yes	-	-	-	-	-	-	-	HMDB0259873	Organoheterocyclic compounds	Naphthofurans	Not Available	-	473.221	6.04828	M-H2O-H	C29H33FN2O4	0	46.2	neg
pos_6602	Midodrine	metab_6174	5.66e-08	4.69e-07	1.6895	1.6805	1.8022	0.8498	yes	C07890	-	-	-	-	-	-	HMDB0014356	Benzenoids	Benzene and substituted derivatives	Methoxybenzenes	133163-28-7;42794-76-3	526.287	3.27318	2M+NH4	C12H18N2O4	0	47.5	pos
neg_4260	Porrigenin A	metab_11365	0.0001701	0.0003593	1.6894	1.6669	1.8089	0.8551	yes	-	-	-	-	-	-	-	HMDB0032783;LMST01080001	Lipids and lipid-like molecules	Prenol lipids	Triterpenoids	196607-75-7	485.267	6.68757	M+K-2H	C27H44O5	0	35	neg
pos_6820	Azetirelin	metab_6414	0.0006828	0.001197	1.689	1.6855	1.956	0.9679	yes	-	-	-	-	-	-	-	HMDB0248799	Organic acids and derivatives	Carboxylic acids and derivatives	Amino acids, peptides, and analogues	-	381.187	2.98535	M+CH3OH+H	C15H20N6O4	0	31.8	pos
pos_6283	N-Docosahexaenoyl Glutamic acid	metab_5821	4.23e-09	7.4e-08	1.6875	1.6772	1.7338	0.794	yes	-	-	-	-	-	-	-	HMDB0242013;LMFA08020089	Organic acids and derivatives	Carboxylic acids and derivatives	Amino acids, peptides, and analogues	-	502.251	3.75345	M+2Na-H	C27H39NO5	0	54.9	pos
neg_7142	Queuosine	metab_14555	0.001855	0.002901	1.6873	1.6835	2.3171	1.2123	yes	-	-	-	-	-	-	-	HMDB0011596	Nucleosides, nucleotides, and analogues	Pyrrolopyrimidine nucleosides and nucleotides	Not Available	57072-36-3	390.145	2.9361	M-H2O-H	C17H23N5O7	0	58.1	neg
pos_3086	Marshrin	metab_2304	7.59e-08	5.79e-07	1.6824	1.6759	0.5417	-0.8845	yes	-	-	-	-	-	-	-	HMDB0033783	Phenylpropanoids and polyketides	Coumarins and derivatives	Not Available	-	308.112	5.24977	M+NH4	C15H14O6	0	58.6	pos
pos_6885	5-Aminosalicylic Acid	metab_6484	4.58e-11	2.92e-09	1.6801	1.6722	0.5389	-0.892	yes	-	-	-	-	-	-	-	HMDB0014389	Benzenoids	Benzene and substituted derivatives	Benzoic acids and derivatives	89-57-6	154.05	2.9057	M+H	C7H7NO3	32.9	0	pos
pos_7105	Minocycline	metab_6730	1.06e-06	4.65e-06	1.6787	1.6661	1.6889	0.7561	yes	C07225	-	-	-	-	-	-	HMDB0015152;LMPK07000002;PW_C009450	Phenylpropanoids and polyketides	Tetracyclines	Not Available	10118-90-8	490.215	2.68427	M+CH3OH+H	C23H27N3O7	0	55	pos
pos_423	Enkephalin L	metab_3557	1.29e-06	5.4e-06	1.6782	1.6753	1.8285	0.8707	yes	-	-	-	-	-	-	-	HMDB0001045	Organic acids and derivatives	Carboxylic acids and derivatives	Amino acids, peptides, and analogues	14-18-6	556.273	2.72415	M+2H, M+H	C28H37N5O7	0	32.9	pos
pos_521	O-Desmethyltramadol glucuronide	metab_4636	2.24e-05	5.99e-05	1.6776	1.6706	1.8532	0.89	yes	-	-	-	-	-	-	-	HMDB0060856;PW_C040591	Organic oxygen compounds	Organooxygen compounds	Carbohydrates and carbohydrate conjugates	138921-77-4	408.198	3.23338	M+H-H2O, M+CH3OH+H	C21H31NO8	0	43.5	pos
neg_7298	(1S,3R,4R)-8,10-Dihydroxyfenchone 10-O-b-D-glucoside	metab_14725	2.36e-12	5.46e-10	1.6766	1.6732	1.9187	0.9401	yes	-	-	-	-	-	-	-	HMDB0033223	Lipids and lipid-like molecules	Prenol lipids	Terpene glycosides	217960-77-5	367.136	1.32992	M+Na-2H	C16H26O8	0	67.4	neg
pos_613	Simonin IV	metab_5651	1.26e-07	8.3e-07	1.6763	1.6714	1.7079	0.7722	yes	-	-	-	-	-	-	-	HMDB0029977	Lipids and lipid-like molecules	Fatty Acyls	Fatty alcohols	151310-53-1	455.933	3.87463	M+2Na+H, M+2Na	C68H120O24	0	41.6	pos
neg_7048	D-Fucitol	metab_14451	3.59e-10	1.35e-08	1.6751	1.6706	1.6551	0.7269	yes	-	-	-	-	-	-	-	HMDB0304954	Organic oxygen compounds	Organooxygen compounds	Carbohydrates and carbohydrate conjugates	-	391.184	3.24093	2M+Hac-H	C6H14O5	0	45.7	neg
pos_7516	N8-Acetylspermidine	metab_7177	2.33e-06	8.85e-06	1.674	1.6649	0.5998	-0.7373	yes	C01029	-	-	-	-	-	-	HMDB0002189	Organic acids and derivatives	Carboximidic acids and derivatives	Carboximidic acids	13431-24-8	188.176	0.875	M+H	C9H21N3O	73.2	0	pos
neg_1889	2-[(E)-2-(3-Nitrophenyl)vinyl]quinoline	metab_8742	6.49e-06	2.52e-05	1.6735	1.6587	0.4993	-1.002	yes	-	-	-	-	-	-	-	HMDB0244962	Organoheterocyclic compounds	Quinolines and derivatives	Not Available	-	297.066	3.91105	M+Na-2H	C17H12N2O2	0	30.1	neg
neg_494	2-Hexadec-7-enylicosa-8,11-dienedioic acid	metab_12116	0.000275	0.0005376	1.6734	1.6647	0.5248	-0.9303	yes	-	-	-	-	-	-	-	HMDB0255383	Lipids and lipid-like molecules	Fatty Acyls	Fatty acids and conjugates	-	559.473	7.15565	M-H, M+Na-2H	C36H64O4	0	78.1	neg
neg_4774	Caffeic acid ester	metab_11933	5.44e-09	1e-07	1.6725	1.6662	0.5957	-0.7473	yes	C10484	-	-	-	-	-	-	HMDB0302344	Phenylpropanoids and polyketides	Cinnamic acids and derivatives	Hydroxycinnamic acids and derivatives	-	329.103	5.98617	M+FA-H	C17H16O4	0	41.7	neg
neg_2301	Viloxazine	metab_9200	2.13e-11	2.12e-09	1.6704	1.6655	1.9126	0.9355	yes	-	-	-	-	-	-	-	HMDB0259807	Benzenoids	Phenol ethers	Not Available	-	473.261	4.52827	2M-H	C13H19NO3	0	30.5	neg
pos_1492	Estriol-17-glucuronide	metab_547	3.04e-12	4.69e-10	1.6662	1.6621	1.734	0.7941	yes	C11346	-	-	-	-	-	-	HMDB0010333	Lipids and lipid-like molecules	Steroids and steroid derivatives	Steroidal glycosides	7219-89-8	482.235	3.14508	M+H, M+NH4	C24H32O9	0	51.1	pos
pos_2684	2-Methoxy-estradiol-17b 3-glucuronide	metab_1859	7.02e-12	7.54e-10	1.6657	1.6613	1.9821	0.987	yes	C11131	-	-	map00140	Steroid hormone biosynthesis	Metabolism	Lipid metabolism	HMDB0006765	Lipids and lipid-like molecules	Steroids and steroid derivatives	Steroidal glycosides	-	443.203	4.04395	M+H-2H2O	C25H34O9	0	53.7	pos
neg_1551	8-methylthiooctyldesulfoglucosinolate	metab_8368	0.003671	0.005374	1.665	1.6794	2.4152	1.2721	yes	-	-	-	-	-	-	-	HMDB0304249	Organic oxygen compounds	Organooxygen compounds	Carbohydrates and carbohydrate conjugates	-	378.141	3.48562	M-H2O-H	C16H31NO6S2	0	33.7	neg
pos_1511	2',3'-Dideoxyuridine	metab_569	7.86e-06	2.45e-05	1.6621	1.6676	1.7353	0.7952	yes	-	-	-	-	-	-	-	HMDB0245547	Nucleosides, nucleotides, and analogues	Pyrimidine nucleosides	Pyrimidine 2'',3''-dideoxyribonucleosides	-	230.114	2.93752	M+H, M+NH4	C9H12N2O4	0	37	pos
pos_3045	Sabeluzole	metab_2259	1.54e-08	1.92e-07	1.6589	1.6551	0.5297	-0.9168	yes	-	-	-	-	-	-	-	HMDB0257434	Organoheterocyclic compounds	Benzothiazoles	Not Available	-	448.207	5.10575	M+CH3OH+H	C22H26FN3O2S	0	54.3	pos
neg_5050	Gly-arg-gly-asp-ser	metab_12240	7.97e-12	1.25e-09	1.6583	1.6546	2.0344	1.0246	yes	-	-	-	-	-	-	-	HMDB0252824	Organic acids and derivatives	Carboxylic acids and derivatives	Amino acids, peptides, and analogues	-	471.192	5.74655	M-H2O-H	C17H30N8O9	0	38.7	neg
pos_6527	Austalide G	metab_6090	1.07e-09	2.76e-08	1.6577	1.6544	1.6883	0.7556	yes	-	-	-	-	-	-	-	HMDB0030154	Organoheterocyclic compounds	Benzopyrans	1-benzopyrans	96817-09-3	551.282	3.38418	M+CH3OH+H	C28H38O9	0	34.5	pos
pos_1990	Asn Leu Gln	metab_1096	9.21e-07	4.16e-06	1.6552	1.655	1.8142	0.8593	yes	-	-	-	-	-	-	-	-	-	-	-	-	374.203	2.49232	M+H	C15H27N5O6	38.3	0	pos
neg_1106	D-Ribulose	metab_7876	3e-12	6.2e-10	1.6552	1.6522	1.7186	0.7812	yes	C00309	Carbohydrates	Monosaccharides	map01100;map00040	Metabolic pathways;Pentose and glucuronate interconversions	Metabolism;Metabolism	Global and overview maps;Carbohydrate metabolism	HMDB0000621	Organic oxygen compounds	Organooxygen compounds	Carbohydrates and carbohydrate conjugates	131064-70-5;488-84-6	449.152	1.23593	3M-H	C5H10O5	0	38.8	neg
pos_7269	Gamma-Glutamylarginine	metab_6906	1.84e-09	4.04e-08	1.6531	1.6441	0.6006	-0.7355	yes	-	-	-	-	-	-	-	HMDB0029143	Organic acids and derivatives	Carboxylic acids and derivatives	Amino acids, peptides, and analogues	31106-03-3	268.14	1.82925	M+H-2H2O	C11H21N5O5	0	31.9	pos
neg_2788	P-Hydroxyubenimex	metab_9736	1.97e-06	9.77e-06	1.6529	1.6482	0.5131	-0.9626	yes	-	-	-	-	-	-	-	HMDB0255924	Organic acids and derivatives	Peptidomimetics	Hybrid peptides	-	305.151	5.39572	M-H2O-H	C16H24N2O5	0	42.3	neg
neg_475	Lexacalcitol	metab_11906	1.43e-07	1.33e-06	1.6525	1.6468	0.6259	-0.6761	yes	-	-	-	-	-	-	-	HMDB0254070	Lipids and lipid-like molecules	Steroids and steroid derivatives	Vitamin D and derivatives	-	459.348	6.71877	M-H, M+Na-2H	C29H48O4	0	43.1	neg
pos_7084	Tetrahydroharmine	metab_6706	3.98e-07	2.07e-06	1.6506	1.6388	0.5036	-0.9897	yes	C09243	-	-	map01063	Biosynthesis of alkaloids derived from shikimate pathway	Metabolism	Chemical structure transformation maps	HMDB0254015	Alkaloids and derivatives	Harmala alkaloids	Not Available	17019-01-1	239.114	2.72415	M+Na	C13H16N2O	0	34.4	pos
pos_7074	L-Metanephrine	metab_6695	0.002882	0.004316	1.65	1.6624	1.9396	0.9557	yes	C05588	-	-	map01100;map00350	Metabolic pathways;Tyrosine metabolism	Metabolism;Metabolism	Global and overview maps;Amino acid metabolism	HMDB0062493	Benzenoids	Phenols	Methoxyphenols	-	417.198	2.73213	2M+Na	C10H15NO3	0	44.4	pos
pos_1998	Acetyllycopsamine	metab_1104	8.61e-05	0.0001922	1.6482	1.6416	1.7163	0.7793	yes	C16751	-	-	-	-	-	-	HMDB0302357	Alkaloids and derivatives	Not Available	Not Available	73544-48-6	405.198	2.52433	M+ACN+Na	C17H27NO6	0	31.9	pos
neg_4856	Lithocholic acid glucuronide	metab_12024	0.000226	0.0004572	1.6442	1.6501	0.4692	-1.0918	yes	C03033	-	-	map01100;map00040;map04976;map00053;map01240	Metabolic pathways;Pentose and glucuronate interconversions;Bile secretion;Ascorbate and aldarate metabolism;Biosynthesis of cofactors	Metabolism;Metabolism;Organismal Systems;Metabolism;Metabolism	Global and overview maps;Carbohydrate metabolism;Digestive system;Carbohydrate metabolism;Global and overview maps	HMDB0254126;HMDB0002513	Lipids and lipid-like molecules	Steroids and steroid derivatives	Steroidal glycosides	75239-91-7	533.312	5.93142	M-H2O-H	C30H48O9	0	40.3	neg
neg_6493	Gynocardin	metab_13836	0.0005469	0.0009711	1.6438	1.6524	2.1175	1.0824	yes	C08331	-	-	-	-	-	-	HMDB0029913	Organic oxygen compounds	Organooxygen compounds	Carbohydrates and carbohydrate conjugates	14332-17-3	324.072	3.76165	M+Na-2H	C12H17NO8	0	49.7	neg
neg_7072	3-Furanmethanol glucoside	metab_14478	4.41e-06	1.85e-05	1.6414	1.6348	0.5153	-0.9566	yes	-	-	-	-	-	-	-	HMDB0032924	Organic oxygen compounds	Organooxygen compounds	Carbohydrates and carbohydrate conjugates	86425-28-7	241.072	3.22528	M-H2O-H	C11H16O7	0	47.7	neg
pos_5262	3-chloro-N-[1-oxo-3-phenyl-1-(4-pyridin-2-ylpiperazin-1-yl)propan-2-yl]benzamide	metab_4694	2.21e-06	8.45e-06	1.6394	1.6393	1.8586	0.8942	yes	-	-	-	-	-	-	-	-	-	-	-	-	449.178	5.76348	M+H	C25H25ClN4O2	75.7	0	pos
neg_7059	Cascarillin	metab_14463	3.66e-08	4.37e-07	1.6388	1.6277	1.8029	0.8503	yes	C09071	-	-	-	-	-	-	HMDB0036836	Lipids and lipid-like molecules	Prenol lipids	Diterpenoids	10118-56-6	453.21	3.2331	M+FA-H	C22H32O7	0	65.6	neg
neg_5159	4-Hydroxypropofol	metab_12360	0.001843	0.002885	1.6366	1.6448	0.1736	-2.526	yes	-	-	-	-	-	-	-	HMDB0014018	Benzenoids	Benzene and substituted derivatives	Cumenes	-	239.129	5.58533	M+FA-H	C12H18O2	0	54.8	neg
neg_1878	DHAP(18:0)	metab_8730	0.01328	0.01714	1.6365	1.6814	2.4098	1.2689	yes	C03805	-	-	-	-	-	-	HMDB0011133;PW_C006772	Organic oxygen compounds	Organooxygen compounds	Carbonyl compounds	-	457.23	3.8954	M+Na-2H	C21H41O7P	0	36.4	neg
neg_3301	7,8-Dihydro-3b,6a-dihydroxy-alpha-ionol 9-glucoside	metab_10304	1.99e-12	5e-10	1.6342	1.6308	1.5712	0.6519	yes	-	-	-	-	-	-	-	HMDB0041578	Lipids and lipid-like molecules	Fatty Acyls	Fatty acyl glycosides	177261-75-5	371.207	6.25812	M-H2O-H	C19H34O8	0	32.8	neg
neg_2633	Leu Glu Lys Glu	metab_9566	2.43e-10	1.05e-08	1.6315	1.6266	2.0539	1.0383	yes	-	-	-	-	-	-	-	-	-	-	-	-	516.267	5.14658	M-H	C22H39N5O9	31.5	0	neg
pos_7163	Val Leu His	metab_6794	6.09e-07	2.97e-06	1.63	1.6292	1.6237	0.6993	yes	-	-	-	-	-	-	-	-	-	-	-	-	368.229	2.57222	M+H	C17H29N5O4	60.5	0	pos
pos_6406	Hernandulcin	metab_5958	1.46e-07	9.35e-07	1.6293	1.6227	0.5106	-0.9697	yes	C09681	-	-	-	-	-	-	HMDB0037906	Lipids and lipid-like molecules	Prenol lipids	Sesquiterpenoids	95602-94-1	259.165	3.5766	M+Na	C15H24O2	0	32.8	pos
pos_4646	(ent-2b,4S,9a)-2,4,9-Trihydroxy-10(14)-oplopen-3-one 2-(2-methylbutanoate) 9-(3-methyl-2E-pentenoate)	metab_4017	6.3e-08	5.1e-07	1.6277	1.6187	0.687	-0.5416	yes	-	-	-	-	-	-	-	HMDB0040993	Lipids and lipid-like molecules	Prenol lipids	Sesquiterpenoids	80489-86-7	413.266	6.40085	M+H-2H2O	C26H40O6	0	33.8	pos
pos_2138	(R)-2-Hydroxy-2H-1,4-benzoxazin-3(4H)-one	metab_1259	8.38e-11	4.47e-09	1.6273	1.6194	0.5726	-0.8044	yes	C15769	-	-	map00402;map01110	Benzoxazinoid biosynthesis;Biosynthesis of secondary metabolites	Metabolism;Metabolism	Biosynthesis of other secondary metabolites;Global and overview maps	HMDB0038318	Organoheterocyclic compounds	Benzoxazines	Benzoxazinones	-	198.076	2.82723	M+CH3OH+H	C8H7NO3	0	45.2	pos
pos_2497	Dihydrodigoxin	metab_1654	0.003537	0.0052	1.6272	1.6438	1.9528	0.9655	yes	-	-	-	-	-	-	-	HMDB0041879	Lipids and lipid-like molecules	Steroids and steroid derivatives	Steroid lactones	5297-10-09	403.218	3.6092	M+H+Na	C41H66O14	0	64.8	pos
pos_5288	Urobilinogen	metab_7754	8.95e-07	4.07e-06	1.6264	1.6248	0.5783	-0.79	yes	C05790	-	-	map00860	Porphyrin and chlorophyll metabolism	Metabolism	Metabolism of cofactors and vitamins	HMDB0001898;HMDB0004158	Organoheterocyclic compounds	Tetrapyrroles and derivatives	Bilirubins	17208-65-0;14684-37-8	623.343	5.69948	M+CH3OH+H	C33H42N4O6	0	62.7	pos
neg_7125	Dihydrojasmonic acid	metab_14536	1.06e-05	3.76e-05	1.6264	1.6156	1.8059	0.8528	yes	-	-	-	-	-	-	-	HMDB0033601	Lipids and lipid-like molecules	Fatty Acyls	Lineolic acids and derivatives	98674-52-3	469.278	3.09145	2M+FA-H	C12H20O3	0	42.8	neg
pos_5534	(+)-Abscisic Acid	metab_4992	5.41e-05	0.0001275	1.6242	1.6193	0.4478	-1.159	yes	C06082	-	-	map01100;map01110;map00906;map01070;map01062;map04075;map01060	Metabolic pathways;Biosynthesis of secondary metabolites;Carotenoid biosynthesis;Biosynthesis of plant hormones;Biosynthesis of terpenoids and steroids;Plant hormone signal transduction;Biosynthesis of plant secondary metabolites	Metabolism;Metabolism;Metabolism;Metabolism;Metabolism;Environmental Information Processing;Metabolism	Global and overview maps;Global and overview maps;Metabolism of terpenoids and polyketides;Chemical structure transformation maps;Chemical structure transformation maps;Signal transduction;Chemical structure transformation maps	HMDB0035140	Lipids and lipid-like molecules	Prenol lipids	Sesquiterpenoids	21293-29-8	265.143	5.18575	M+H	C15H20O4	62	0	pos
pos_2014	D-Ornithine	metab_1124	1.64e-05	4.58e-05	1.6232	1.6169	0.5853	-0.7727	yes	C00515	-	-	map01100;map00997;map01110	Metabolic pathways;Biosynthesis of various secondary metabolites - part 3;Biosynthesis of secondary metabolites	Metabolism;Metabolism;Metabolism	Global and overview maps;Biosynthesis of other secondary metabolites;Global and overview maps	HMDB0003374;PW_C001864	Organic acids and derivatives	Carboxylic acids and derivatives	Amino acids, peptides, and analogues	348-66-3	174.124	2.57222	M+ACN+H	C5H12N2O2	0	36.4	pos
pos_5129	Cytosine deoxyribonucleoside	metab_4547	0.0006629	0.001166	1.6225	1.6268	1.8793	0.9102	yes	C00881	Nucleic acids	Nucleosides	map00240;map01100;map02010	Pyrimidine metabolism;Metabolic pathways;ABC transporters	Metabolism;Metabolism;Environmental Information Processing	Nucleotide metabolism;Global and overview maps;Membrane transport	HMDB0250725;HMDB0000014	Nucleosides, nucleotides, and analogues	Pyrimidine nucleosides	Pyrimidine 2''-deoxyribonucleosides	951-77-9	472.218	5.94782	2M+NH4	C9H13N3O4	0	35.7	pos
pos_5752	Kallidin	metab_5231	7.36e-11	4.04e-09	1.6207	1.614	1.6834	0.7513	yes	C01505	-	-	-	-	-	-	HMDB0253760	Organic Polymers	Polypeptides	Not Available	342-10-9	594.83	4.72837	M+2H	C56H85N17O12	0	49	pos
neg_533	PE(18:1/0:0)	metab_12549	0.0001322	0.0002921	1.6168	1.6219	1.9229	0.9433	yes	-	-	-	-	-	-	-	LMGP02050004	-	-	-	-	478.294	7.53102	M-H, M+Na-2H	C23H46NO7P	91.7	0	neg
neg_778	N-hydroxy-L-tryptophan	metab_15114	8.55e-06	3.15e-05	1.6158	1.6064	1.6896	0.7567	yes	C19716	-	-	-	-	-	-	HMDB0255152	Organoheterocyclic compounds	Indoles and derivatives	Indolyl carboxylic acids and derivatives	-	499.179	2.18385	M-H, 2M+Hac-H	C11H12N2O3	0	44.9	neg
pos_3618	17-hydroxyprogesterone caproate	metab_2885	0.002613	0.003949	1.6153	1.6712	1.8212	0.8649	yes	-	-	-	-	-	-	-	HMDB0244774	Lipids and lipid-like molecules	Steroids and steroid derivatives	Pregnane steroids	-	483.248	6.68705	M+K	C27H40O5	0	31.3	pos
pos_4946	Cholylarginine	metab_4346	4.82e-07	2.43e-06	1.6137	1.6003	1.515	0.5993	yes	-	-	-	-	-	-	-	HMDB0242375	Lipids and lipid-like molecules	Steroids and steroid derivatives	Bile acids, alcohols and derivatives	-	565.396	6.09132	M+H	C30H52N4O6	0	58.2	pos
pos_4333	1-Nonadecanoyl-glycero-3-phosphoethanolamine	metab_3671	1.57e-11	1.46e-09	1.6122	1.6079	1.4982	0.5832	yes	-	-	-	-	-	-	-	LMGP02050028;HMDB0243971	Lipids and lipid-like molecules	Glycerophospholipids	Glycerophosphoethanolamines	-	991.672	6.92557	2M+H	C24H50NO7P	0	72.3	pos
pos_6021	2',2'-Difluorodeoxyuridine	metab_5531	4.12e-12	5.42e-10	1.6107	1.6079	1.8692	0.9024	yes	-	-	-	-	-	-	-	HMDB0060727	Nucleosides, nucleotides, and analogues	Pyrimidine nucleosides	Pyrimidine 2''-deoxyribonucleosides	-	282.091	4.20532	M+NH4	C9H10F2N2O5	0	36.5	pos
neg_6754	Acotiamide	metab_14125	0.0007778	0.001335	1.6099	1.6196	1.9908	0.9933	yes	C14127	-	-	-	-	-	-	HMDB0247965	Benzenoids	Benzene and substituted derivatives	Phenoxyacetic acid derivatives	185106-16-5	431.178	3.49345	M-H2O-H	C21H30N4O5S	0	38.4	neg
neg_234	Pteroside Z	metab_9242	2.59e-08	3.26e-07	1.6097	1.6057	1.6111	0.6881	yes	-	-	-	-	-	-	-	HMDB0032587	Organic oxygen compounds	Organooxygen compounds	Carbohydrates and carbohydrate conjugates	35943-37-4	393.188	4.08403	M-H, M+Na-2H	C21H30O7	0	76.6	neg
pos_6549	Sisomicin sulfate	metab_6114	3.33e-05	8.39e-05	1.6092	1.6291	1.7114	0.7751	yes	-	-	-	-	-	-	-	HMDB0242632	Not Available	Not Available	Not Available	-	470.261	3.35237	M+Na	C19H37N5O7	0	84.8	pos
neg_7093	Gln Val Asp Glu	metab_14501	4.39e-06	1.84e-05	1.609	1.6066	1.6237	0.6993	yes	-	-	-	-	-	-	-	-	-	-	-	-	488.2	3.18613	M-H	C19H31N5O10	69.8	0	neg
pos_2056	Deoxythioguanosine	metab_1169	0.0002524	0.0004947	1.6089	1.6004	0.5025	-0.9928	yes	-	-	-	-	-	-	-	HMDB0251016	Nucleosides, nucleotides, and analogues	Purine nucleosides	Purine 2'',3''-dideoxyribonucleosides	-	248.059	2.68427	M+H-2H2O	C10H13N5O3S	0	44.2	pos
pos_3359	Isoachifolidiene	metab_2603	1.89e-07	1.14e-06	1.6087	1.5972	0.5952	-0.7486	yes	-	-	-	-	-	-	-	HMDB0038690	Lipids and lipid-like molecules	Fatty Acyls	Fatty acid esters	-	383.127	5.98768	M+K	C20H24O5	0	60.7	pos
pos_6221	3-trans-p-Coumaroylrotundic acid	metab_5753	2e-07	1.19e-06	1.6081	1.6012	1.7865	0.8371	yes	-	-	-	-	-	-	-	HMDB0040667	Lipids and lipid-like molecules	Prenol lipids	Triterpenoids	144624-03-3	698.408	3.85862	M+ACN+Na	C39H54O7	0	62.6	pos
neg_473	(3beta,22R,23R,24S)-3,22,23-Trihydroxystigmastan-6-one	metab_11884	3.52e-09	7.18e-08	1.6076	1.6023	0.6258	-0.6761	yes	-	-	-	-	-	-	-	HMDB0039713	Lipids and lipid-like molecules	Steroids and steroid derivatives	Stigmastanes and derivatives	90524-90-6	461.364	6.60152	M-H, M+Cl	C29H50O4	0	44.2	neg
pos_1643	Ser His	metab_714	7.62e-06	2.39e-05	1.6071	1.6037	1.6111	0.6881	yes	-	-	-	-	-	-	-	-	-	-	-	-	243.109	0.9301	M+H, M+ACN+H	C9H14N4O4	76.6	0	pos
pos_5886	Methoxamine	metab_5379	4.74e-06	1.61e-05	1.6062	1.6077	0.6236	-0.6812	yes	C07513	-	-	-	-	-	-	HMDB0014861	Benzenoids	Benzene and substituted derivatives	Methoxybenzenes	390-28-3	212.128	4.4552	M+H	C11H17NO3	41.3	0	pos
neg_2399	DG(8:0/0:0/22:6(5Z,8E,10Z,13Z,15E,19Z)-2OH(7S, 17S))	metab_9305	7.75e-11	4.72e-09	1.6062	1.6052	1.6426	0.716	yes	-	-	-	-	-	-	-	HMDB0297201	Not Available	Not Available	Not Available	-	605.367	4.7089	M+FA-H	C33H52O7	0	51.9	neg
pos_228	LysoPC(22:6(4Z,7Z,10Z,13Z,16Z,19Z)/0:0)	metab_1414	1.14e-06	4.93e-06	1.6034	1.5958	1.4352	0.5213	yes	C04230	Lipids	Phospholipids	map00564;map05231	Glycerophospholipid metabolism;Choline metabolism in cancer	Metabolism;Human Diseases	Lipid metabolism;Cancer: overview	HMDB0010404	Lipids and lipid-like molecules	Glycerophospholipids	Glycerophosphocholines	162440-05-3	568.339	6.59177	M+H, M+Na, M+H-H2O	C30H50NO7P	0	74.5	pos
neg_1934	Cucurbitacin I	metab_8793	1.02e-09	2.68e-08	1.6033	1.6018	1.7652	0.8198	yes	C08800	-	-	-	-	-	-	HMDB0250582;LMST01010110	Lipids and lipid-like molecules	Steroids and steroid derivatives	Cucurbitacins	2222-07-03	549.267	3.9737	M+Cl	C30H42O7	0	73.8	neg
pos_6337	PIP(PGE1/22:3(10Z,13Z,16Z))	metab_5881	3.33e-09	6.15e-08	1.6027	1.6004	1.7483	0.806	yes	-	-	-	-	-	-	-	HMDB0280376	Not Available	Not Available	Not Available	-	541.28	3.66497	M+2H	C52H90O19P2	0	86.1	pos
pos_4410	MG(0:0/22:1(13Z)/0:0)	metab_3757	2.44e-05	6.43e-05	1.6021	1.5938	0.5738	-0.8013	yes	-	-	-	-	-	-	-	HMDB0011552	Lipids and lipid-like molecules	Glycerolipids	Monoradylglycerols	-	435.346	6.79055	M+Na	C25H48O4	0	42.3	pos
neg_2427	Glycyl-histidyl-arginyl-proline	metab_9337	9.25e-05	0.0002166	1.6008	1.5774	1.8418	0.8811	yes	-	-	-	-	-	-	-	HMDB0252877	Organic acids and derivatives	Carboxylic acids and derivatives	Amino acids, peptides, and analogues	-	486.22	4.7733	M+Na-2H	C19H31N9O5	0	43.7	neg
neg_6909	Skepinone-L	metab_14296	2.2e-12	5.32e-10	1.5997	1.5962	1.8583	0.894	yes	-	-	-	-	-	-	-	HMDB0258326	Benzenoids	Dibenzocycloheptenes	Not Available	-	406.129	3.34393	M-H2O-H	C24H21F2NO4	0	54	neg
neg_6533	Physangulide	metab_13880	2.43e-10	1.05e-08	1.5992	1.5948	1.799	0.8472	yes	-	-	-	-	-	-	-	HMDB0037381	Lipids and lipid-like molecules	Steroids and steroid derivatives	Steroid lactones	131749-58-1	557.257	3.714	M+Cl	C28H42O9	0	43.2	neg
neg_7180	2-(Arabinosylamino)-3-(glucosylamino)propanenitrile	metab_14596	3.16e-05	9.13e-05	1.5982	1.602	1.7537	0.8104	yes	-	-	-	-	-	-	-	HMDB0039505	Organic oxygen compounds	Organooxygen compounds	Carbohydrates and carbohydrate conjugates	26401-22-9	360.141	2.39538	M-H2O-H	C14H25N3O9	0	46.1	neg
pos_5926	Gamma-L-Glutamyl-gamma-L-glutamyl-L-methionine	metab_5424	1.39e-10	6.35e-09	1.5971	1.5941	1.8766	0.9081	yes	-	-	-	-	-	-	-	HMDB0038674	Organic acids and derivatives	Carboxylic acids and derivatives	Amino acids, peptides, and analogues	41515-84-8	449.17	4.3746	M+ACN+H	C15H25N3O8S	0	73	pos
pos_7429	6-O-(6-Deoxy-alpha-L-mannopyranosyl)-beta-D-glucopyranose	metab_7082	8.73e-07	3.98e-06	1.5961	1.5929	0.6278	-0.6717	yes	C08247	Carbohydrates	Oligosaccharides	-	-	-	-	HMDB0247100;HMDB0302439	Organic oxygen compounds	Organooxygen compounds	Carbohydrates and carbohydrate conjugates	-	349.11	0.992917	M+Na	C12H22O10	0	61.1	pos
pos_4107	PC(18:1(9Z)e/2:0)	metab_3423	2.33e-07	1.35e-06	1.5945	1.5929	1.5399	0.6229	yes	C04598	-	-	map00565;map01100;map04080;map05310	Ether lipid metabolism;Metabolic pathways;Neuroactive ligand-receptor interaction;Asthma	Metabolism;Metabolism;Environmental Information Processing;Human Diseases	Lipid metabolism;Global and overview maps;Signaling molecules and interaction;Immune disease	HMDB0011148	Lipids and lipid-like molecules	Glycerophospholipids	Glycerophosphocholines	-	572.368	7.67213	M+Na	C28H56NO7P	0	78.4	pos
pos_6683	Leu Gly Ala Pro Gly	metab_6262	7.75e-05	0.0001748	1.593	1.5914	1.6427	0.716	yes	-	-	-	-	-	-	-	-	-	-	-	-	414.234	3.16903	M+H	C18H31N5O6	40.8	0	pos
pos_795	Adenosine, 8-(butylamino)-N-cyclopentyl-	metab_7469	0.0002042	0.0004099	1.5928	1.5912	1.6709	0.7406	yes	-	-	-	-	-	-	-	HMDB0258096	Nucleosides, nucleotides, and analogues	Purine nucleosides	Not Available	-	407.239	5.61958	M+H, M+Na	C19H30N6O4	0	58	pos
pos_2454	Lidoflazine	metab_1607	3.33e-09	6.15e-08	1.5928	1.5838	1.6232	0.6989	yes	-	-	-	-	-	-	-	HMDB0254083	Benzenoids	Benzene and substituted derivatives	Diphenylmethanes	-	524.308	3.51208	M+CH3OH+H	C30H35F2N3O	0	52.4	pos
pos_6933	N-Acetylmuramate	metab_6538	4.72e-05	0.0001132	1.5901	1.581	0.5681	-0.8157	yes	C02713	Carbohydrates	Monosaccharides	map01100;map00520;map02060	Metabolic pathways;Amino sugar and nucleotide sugar metabolism;Phosphotransferase system (PTS)	Metabolism;Metabolism;Environmental Information Processing	Global and overview maps;Carbohydrate metabolism;Membrane transport	HMDB0060493	Organic oxygen compounds	Organooxygen compounds	Carbohydrates and carbohydrate conjugates	61633-75-8	276.108	2.82723	M+H-H2O	C11H19NO8	75.9	0	pos
neg_1619	3-Benzyl-5-(6-carboxyhexyl)-1-(2-cyclohexyl-2-hydroxyethylamino)hydantoin	metab_8443	6.66e-05	0.0001656	1.5898	1.601	1.6338	0.7082	yes	-	-	-	-	-	-	-	HMDB0249489	Organoheterocyclic compounds	Azolidines	Imidazolidines	-	440.251	3.56445	M-H2O-H	C25H37N3O5	0	48.7	neg
pos_2701	Dodeca-8,10-dienedioylcarnitine	metab_1879	0.0006515	0.001149	1.5891	1.562	1.9589	0.9701	yes	-	-	-	-	-	-	-	HMDB0241270	Lipids and lipid-like molecules	Fatty Acyls	Fatty acid esters	-	433.23	4.1006	M+ACN+Na	C19H31NO6	0	38.5	pos
pos_5248	Megestrol	metab_4678	2.38e-06	8.99e-06	1.5887	1.5887	0.5286	-0.9198	yes	C07120	-	-	-	-	-	-	HMDB0014495;LMST02030177	Lipids and lipid-like molecules	Steroids and steroid derivatives	Pregnane steroids	3562-63-8	373.176	5.78008	M+2Na-H	C21H28O3	0	45.6	pos
neg_7082	Linatine	metab_14489	2.01e-06	9.93e-06	1.587	1.5843	1.7458	0.8039	yes	C05939	-	-	map01100;map00330	Metabolic pathways;Arginine and proline metabolism	Metabolism;Metabolism	Global and overview maps;Amino acid metabolism	HMDB0038516	Organic acids and derivatives	Carboxylic acids and derivatives	Amino acids, peptides, and analogues	10139-06-7	517.226	3.20965	2M-H	C10H17N3O5	0	47.3	neg
neg_6003	Lanopepden	metab_13296	6.75e-09	1.2e-07	1.5865	1.5775	1.633	0.7075	yes	-	-	-	-	-	-	-	HMDB0253975	Organoheterocyclic compounds	Diazinanes	Piperazines	-	500.236	4.32042	M+Na-2H	C22H34FN7O4	0	50.6	neg
neg_3596	LysoPE(18:1(11Z)/0:0)	metab_10629	3.25e-06	1.46e-05	1.586	1.5813	1.587	0.6663	yes	-	-	-	-	-	-	-	HMDB0011505	Lipids and lipid-like molecules	Glycerophospholipids	Glycerophosphoethanolamines	-	524.299	6.85155	M+FA-H	C23H46NO7P	0	86.8	neg
pos_2772	Micronomicin	metab_1957	4.7e-12	5.85e-10	1.5858	1.5815	1.7235	0.7854	yes	-	-	-	-	-	-	-	HMDB0254707	Organic oxygen compounds	Organooxygen compounds	Carbohydrates and carbohydrate conjugates	-	527.319	4.29402	M+ACN+Na	C20H41N5O7	0	70.2	pos
neg_1537	Glabrin A	metab_8352	8.8e-08	8.88e-07	1.5838	1.5732	1.6866	0.7541	yes	-	-	-	-	-	-	-	HMDB0301777	Organic acids and derivatives	Carboxylic acids and derivatives	Amino acids, peptides, and analogues	162157-00-8	349.162	3.46995	2M-H	C7H13NO4	0	43	neg
pos_3024	Ethosuximide	metab_2236	7.83e-09	1.18e-07	1.5835	1.576	0.5582	-0.8412	yes	C07505	-	-	-	-	-	-	HMDB0014731	Organoheterocyclic compounds	Pyrrolidines	Pyrrolidones	77-67-8	305.149	5.04975	2M+Na	C7H11NO2	0	32.3	pos
pos_6770	Cynaroside A	metab_6358	8.69e-10	2.36e-08	1.5833	1.5811	1.753	0.8099	yes	-	-	-	-	-	-	-	HMDB0040532	Lipids and lipid-like molecules	Prenol lipids	Terpene lactones	117804-06-5	409.182	3.05703	M+H-2H2O	C21H32O10	0	82.2	pos
neg_5261	1-(beta-D-Glucopyranosyloxy)-3-octanone	metab_12474	1.67e-09	3.9e-08	1.5814	1.5734	0.5481	-0.8674	yes	-	-	-	-	-	-	-	HMDB0031315	Lipids and lipid-like molecules	Fatty Acyls	Fatty acyl glycosides	194919-40-9	305.16	5.42703	M-H	C14H26O7	0	39.2	neg
pos_4077	Curcumenol	metab_3389	2.36e-12	4.22e-10	1.5813	1.5775	1.5629	0.6442	yes	C16942	-	-	-	-	-	-	HMDB0033960;MJDBOTE0000956	Lipids and lipid-like molecules	Prenol lipids	Sesquiterpenoids	19431-84-6	510.356	7.73553	2M+ACN+H	C15H22O2	0	49.9	pos
pos_2074	PA(16:1(9Z)/5-iso PGF2VI)	metab_1189	2.44e-06	9.19e-06	1.5809	1.5662	1.8003	0.8483	yes	-	-	-	-	-	-	-	HMDB0263414	Not Available	Not Available	Not Available	-	381.2	2.72415	M+2Na	C37H65O11P	0	46.9	pos
neg_2526	(1S,2S,4R,8R)-p-Menthane-1,2,8,9-tetrol	metab_9447	2.01e-08	2.71e-07	1.5809	1.5748	0.5722	-0.8053	yes	-	-	-	-	-	-	-	HMDB0039974	Lipids and lipid-like molecules	Prenol lipids	Monoterpenoids	402593-46-8	203.128	4.96698	M-H	C10H20O4	0	32.5	neg
pos_5325	Leu Leu Phe	metab_4763	1.54e-07	9.75e-07	1.5807	1.5795	1.8012	0.849	yes	-	-	-	-	-	-	-	-	-	-	-	-	392.254	5.61958	M+H	C21H33N3O4	87.4	0	pos
neg_4943	N-Oleoyl Glutamine	metab_12120	1.81e-06	9.21e-06	1.58	1.5832	1.7157	0.7788	yes	-	-	-	-	-	-	-	HMDB0241958;LMFA08020128	Organic acids and derivatives	Carboxylic acids and derivatives	Amino acids, peptides, and analogues	-	447.261	5.87652	M+K-2H	C23H42N2O4	0	40.7	neg
neg_2359	Terbogrel	metab_9263	0.0006435	0.001127	1.58	1.5905	1.9979	0.9985	yes	-	-	-	-	-	-	-	HMDB0258827	Not Available	Not Available	Not Available	-	440.189	4.63315	M+Cl	C23H27N5O2	0	37.7	neg
pos_1502	Trp Asp	metab_559	0.0003628	0.0006833	1.5752	1.5755	1.6622	0.7331	yes	-	-	-	-	-	-	-	-	-	-	-	-	320.124	3.0331	M+H, M+NH4	C15H17N3O5	91	0	pos
pos_3159	2,7-dihydroxy-4'-methoxyisoflavanone	metab_2385	3.19e-08	3.14e-07	1.5748	1.5658	0.5707	-0.8091	yes	C16190	-	-	map00943	Isoflavonoid biosynthesis	Metabolism	Biosynthesis of other secondary metabolites	HMDB0304048	Phenylpropanoids and polyketides	Isoflavonoids	O-methylated isoflavonoids	-	304.118	5.45047	M+NH4	C16H14O5	0	36.4	pos
neg_1308	Histidinyl-Tryptophan	metab_8099	9.83e-07	5.78e-06	1.5735	1.5701	1.7403	0.7994	yes	-	-	-	-	-	-	-	HMDB0304782;HMDB0028896	Organic acids and derivatives	Carboxylic acids and derivatives	Amino acids, peptides, and analogues	23403-90-9	340.141	3.21747	M-H	C17H19N5O3	0	60.7	neg
pos_824	Lucidenic acid K	metab_7502	2e-11	1.68e-09	1.5729	1.5693	1.5823	0.6621	yes	-	-	-	-	-	-	-	HMDB0035890	Lipids and lipid-like molecules	Prenol lipids	Triterpenoids	-	986.535	5.8998	M+H, 2M+ACN+H	C27H36O7	0	74	pos
neg_4530	10,11-dihydro-20-trihydroxy-leukotriene B4	metab_11664	2.31e-07	1.9e-06	1.5708	1.5729	1.4766	0.5622	yes	-	-	-	-	-	-	-	HMDB0012503;LMFA03020044	Lipids and lipid-like molecules	Fatty Acyls	Eicosanoids	-	385.223	6.3203	M-H	C20H34O7	0	73.6	neg
pos_2618	Desglucocheirotoxol	metab_1787	4.56e-12	5.85e-10	1.5705	1.567	1.6216	0.6974	yes	-	-	-	-	-	-	-	HMDB0033828	Lipids and lipid-like molecules	Steroids and steroid derivatives	Steroid lactones	29336-13-8	585.324	3.89062	M+CH3OH+H	C29H44O10	0	47.2	pos
pos_5433	9,10-Epoxy-18-hydroxy-octadecanoic acid	metab_4883	3.63e-05	9.07e-05	1.5688	1.5648	0.5312	-0.9126	yes	C19620	-	-	map00073	Cutin, suberine and wax biosynthesis	Metabolism	Lipid metabolism	HMDB0302107	Lipids and lipid-like molecules	Fatty Acyls	Fatty acids and conjugates	-	353.206	5.37845	M+K	C18H34O4	0	60	pos
pos_5484	PS(20:4(5Z,8Z,11Z,14Z)-OH(16R)/22:4(7Z,10Z,13Z,16Z))	metab_4937	7.55e-05	0.0001708	1.5682	1.5498	1.7904	0.8403	yes	-	-	-	-	-	-	-	HMDB0283203	Not Available	Not Available	Not Available	-	460.753	5.28178	M+2Na	C48H78NO11P	0	72.7	pos
pos_653	Phenylalanyl-Alanine	metab_6093	1.2e-05	3.48e-05	1.5667	1.5518	0.508	-0.9772	yes	-	-	-	-	-	-	-	HMDB0028988;HMDB0304787	Organic acids and derivatives	Carboxylic acids and derivatives	Amino acids, peptides, and analogues	3918-87-4	269.149	4.15665	M+Na, M+CH3OH+H	C12H16N2O3	0	54.4	pos
pos_7173	Cis-3-Hexenyl b-primeveroside	metab_6805	8.48e-06	2.62e-05	1.5656	1.5515	1.6779	0.7467	yes	-	-	-	-	-	-	-	HMDB0031690	Lipids and lipid-like molecules	Fatty Acyls	Fatty acyl glycosides	132278-37-6	412.219	2.5483	M+NH4	C17H30O10	0	41.3	pos
pos_2250	4-Hydroxymandelonitrile	metab_7700	0.0002323	0.0004589	1.5648	1.5685	0.3475	-1.5248	yes	C03742	-	-	map00460;map01100;map01110	Cyanoamino acid metabolism;Metabolic pathways;Biosynthesis of secondary metabolites	Metabolism;Metabolism;Metabolism	Metabolism of other amino acids;Global and overview maps;Global and overview maps	HMDB0060318	Benzenoids	Phenols	1-hydroxy-2-unsubstituted benzenoids	71807-09-5	150.055	3.06492	M+H	C8H7NO2	53.4	0	pos
pos_4489	Choline Phosphate	metab_3843	0.0001344	0.0002853	1.5622	1.5484	1.5242	0.608	yes	C00588	-	-	map01100;map00564;map05231	Metabolic pathways;Glycerophospholipid metabolism;Choline metabolism in cancer	Metabolism;Metabolism;Human Diseases	Global and overview maps;Lipid metabolism;Cancer: overview	HMDB0001565	Organic nitrogen compounds	Organonitrogen compounds	Quaternary ammonium salts	107-73-3;3616-04-4	184.073	6.64738	M+H	C5H14NO4P	58.9	0	pos
pos_3272	Deoxycholyltryptophan	metab_2508	7.34e-06	2.31e-05	1.5603	1.5593	0.5964	-0.7456	yes	-	-	-	-	-	-	-	HMDB0242417	Not Available	Not Available	Not Available	-	623.343	5.81198	M+2Na-H	C35H50N2O5	0	60.8	pos
neg_5650	1-Hydroxy-2,2,5,5-tetramethyl-2,5-dihydro-1h-pyrrole-3-carboxamide	metab_12904	5.15e-05	0.000135	1.56	1.5515	1.6953	0.7615	yes	-	-	-	-	-	-	-	HMDB0243893	Organoheterocyclic compounds	Pyrrolines	Pyrroline carboxylic acids and derivatives	-	413.24	4.84137	2M+FA-H	C9H16N2O2	0	33.9	neg
neg_4965	LysoPA(22:6(4Z,7Z,10Z,13Z,16Z,19Z)/0:0)	metab_12144	5.58e-05	0.0001438	1.5594	1.5582	0.5662	-0.8205	yes	-	-	-	-	-	-	-	HMDB0114755	Lipids and lipid-like molecules	Glycerophospholipids	Glycerophosphates	-	517.211	5.86083	M+Cl	C25H39O7P	0	31.9	neg
neg_5223	Phaseic acid	metab_12432	0.000157	0.0003372	1.5581	1.5503	0.482	-1.053	yes	C09707	-	-	map00906	Carotenoid biosynthesis	Metabolism	Metabolism of terpenoids and polyketides	HMDB0302844	Lipids and lipid-like molecules	Prenol lipids	Sesquiterpenoids	24394-14-7	279.124	5.48687	M-H	C15H20O5	0	63.1	neg
neg_2446	Ent-Abacavir	metab_9358	0.0001344	0.0002958	1.5574	1.5399	1.7686	0.8226	yes	-	-	-	-	-	-	-	HMDB0251820	Nucleosides, nucleotides, and analogues	Nucleoside and nucleotide analogues	Cyclopentyl nucleosides	-	331.151	4.81148	M+FA-H	C14H18N6O	0	30.3	neg
neg_4836	(1alpha,4alpha,5beta,6alpha,11betaH)-1,4-Epoxy-5-hydroxy-10(14)-germacren-12,6-olide	metab_12002	1.05e-08	1.64e-07	1.5564	1.5509	0.5331	-0.9075	yes	-	-	-	-	-	-	-	HMDB0037005	Organoheterocyclic compounds	Lactones	Gamma butyrolactones	-	265.144	5.94705	M-H	C15H22O4	0	66.7	neg
neg_1620	Benazepril	metab_8445	0.0001515	0.0003276	1.5554	1.5514	1.9286	0.9476	yes	C06843	-	-	-	-	-	-	PW_C009037;HMDB0014682;MJDBOTE0001359	Organic acids and derivatives	Carboxylic acids and derivatives	Amino acids, peptides, and analogues	86541-75-5	459.173	3.56445	M+Cl	C24H28N2O5	0	50.7	neg
pos_6912	Proline glutamate	metab_6515	0.003741	0.005455	1.5525	1.5699	1.7803	0.8321	yes	-	-	-	-	-	-	-	HMDB0256798	Organic acids and derivatives	Carboxylic acids and derivatives	Amino acids, peptides, and analogues	-	302.135	2.87382	M+ACN+H	C10H16N2O6	0	51.4	pos
neg_1574	Arg Ile Asp Asp	metab_8393	4.76e-10	1.58e-08	1.5523	1.5473	1.7053	0.77	yes	-	-	-	-	-	-	-	-	-	-	-	-	516.243	3.50913	M-H	C20H35N7O9	40.6	0	neg
pos_6154	Calpeptin	metab_5678	0.001147	0.001898	1.5513	1.5508	1.8364	0.8769	yes	C11256	-	-	-	-	-	-	HMDB0249563	Organic acids and derivatives	Carboxylic acids and derivatives	Amino acids, peptides, and analogues	117591-20-5	407.193	3.97132	M+2Na-H	C20H30N2O4	0	32.3	pos
neg_1301	3'-Deoxythymidine	metab_8092	3.64e-08	4.35e-07	1.5479	1.5399	0.5611	-0.8338	yes	-	-	-	-	-	-	-	HMDB0246094	Nucleosides, nucleotides, and analogues	Pyrimidine nucleosides	Pyrimidine 2'',3''-dideoxyribonucleosides	-	207.077	3.20965	M-H2O-H	C10H14N2O4	0	45.6	neg
neg_7170	Lactic Acid	metab_15379	3.25e-09	6.73e-08	1.5466	1.5437	1.7446	0.8029	yes	C00954	-	-	map01100;map01070;map00380;map04075	Metabolic pathways;Biosynthesis of plant hormones;Tryptophan metabolism;Plant hormone signal transduction	Metabolism;Metabolism;Metabolism;Environmental Information Processing	Global and overview maps;Chemical structure transformation maps;Amino acid metabolism;Signal transduction	HMDB0001311;HMDB0000197;HMDB0000190	Organic acids and derivatives	Hydroxy acids and derivatives	Alpha hydroxy acids and derivatives	87-51-4;79-33-4;10326-41-7;50-21-5	269.088	2.50508	3M-H	C3H6O3	31.9	0	neg
pos_5274	Capsianside A	metab_4707	3.39e-09	6.24e-08	1.5461	1.5445	1.628	0.7031	yes	C17516	-	-	-	-	-	-	HMDB0034044	Lipids and lipid-like molecules	Fatty Acyls	Fatty acyl glycosides	116107-40-5	794.396	5.73148	M+H+Na	C76H124O33	0	34.1	pos
pos_3225	Deltaline	metab_2458	3.93e-10	1.32e-08	1.5448	1.5429	1.602	0.6799	yes	C08679	-	-	-	-	-	-	HMDB0250984	Lipids and lipid-like molecules	Prenol lipids	Diterpenoids	6836-11-09	549.32	5.67548	M+ACN+H	C27H41NO8	0	43.3	pos
pos_6060	N-Acetylserotonin	metab_5574	2.97e-07	1.63e-06	1.5444	1.5445	1.698	0.7638	yes	C00978	-	-	map01100;map01110;map00380	Metabolic pathways;Biosynthesis of secondary metabolites;Tryptophan metabolism	Metabolism;Metabolism;Metabolism	Global and overview maps;Global and overview maps;Amino acid metabolism	PW_C000956;HMDB0001238	Organoheterocyclic compounds	Indoles and derivatives	Hydroxyindoles	1210-83-9	251.139	4.11663	M+CH3OH+H	C12H14N2O2	0	43.1	pos
neg_4693	Cowagarcinone D	metab_11843	8.06e-05	0.0001932	1.544	1.5538	0.6106	-0.7117	yes	-	-	-	-	-	-	-	HMDB0304628	Organoheterocyclic compounds	Benzopyrans	1-benzopyrans	-	507.203	6.06387	M+FA-H	C28H30O6	0	55.8	neg
pos_3259	Methyl 7-epi-12-hydroxyjasmonate glucoside	metab_2494	0.0002851	0.000553	1.5437	1.5558	1.6738	0.7431	yes	-	-	-	-	-	-	-	HMDB0031763	Lipids and lipid-like molecules	Fatty Acyls	Fatty acyl glycosides	142465-56-3	444.223	5.7721	M+ACN+H	C19H30O9	0	60.6	pos
neg_6000	Dmean	metab_13293	6.9e-06	2.65e-05	1.5432	1.5453	1.5969	0.6753	yes	-	-	-	-	-	-	-	HMDB0251537	Benzenoids	Naphthalenes	Not Available	-	872.401	4.32042	3M-H	C18H17N3O	0	55.8	neg
neg_3385	Capsicoside A1	metab_10396	0.000153	0.0003299	1.5432	1.5521	1.6357	0.7099	yes	-	-	-	-	-	-	-	HMDB0303762	Lipids and lipid-like molecules	Steroids and steroid derivatives	Steroidal glycosides	-	575.359	6.41385	M-H2O-H	C33H54O9	0	30.5	neg
neg_1382	Paliperidone	metab_8181	1.18e-10	6.08e-09	1.5422	1.5379	1.6318	0.7064	yes	C21516	-	-	-	-	-	-	HMDB0247256;HMDB0015396;HMDB0256085	Organoheterocyclic compounds	Pyridopyrimidines	Not Available	144598-75-4	471.209	3.29633	M+FA-H	C23H27FN4O3	0	30.2	neg
neg_7068	Pentanoic acid, 5-(dipentylamino)-5-oxo-4-((3-quinolinylcarbonyl)amino)-, (R)-	metab_14473	5.94e-06	2.35e-05	1.5413	1.5448	1.6542	0.7261	yes	-	-	-	-	-	-	-	HMDB0247713	Organic acids and derivatives	Carboxylic acids and derivatives	Amino acids, peptides, and analogues	-	478.216	3.22528	M+K-2H	C25H35N3O4	0	59.5	neg
neg_748	M2 di-hydroxylated metabolite	metab_14924	4.38e-11	3.43e-09	1.5409	1.5347	1.6341	0.7085	yes	-	-	-	-	-	-	-	HMDB0061046	Organoheterocyclic compounds	Indoles and derivatives	N-alkylindoles	-	460.184	4.01348	M-H2O-H, M+Cl	C24H28FN3O3	0	47.6	neg
neg_4430	LysoPE(20:4(5Z,8Z,11Z,14Z)/0:0)	metab_11553	3.13e-06	1.42e-05	1.5402	1.5394	1.4688	0.5546	yes	-	-	-	-	-	-	-	HMDB0011517	Lipids and lipid-like molecules	Glycerophospholipids	Glycerophosphoethanolamines	652149-09-2	500.278	6.45287	M-H	C25H44NO7P	0	70.9	neg
neg_5297	Forskolin	metab_15375	4.28e-05	0.0001166	1.5399	1.5399	1.5666	0.6477	yes	C09076	-	-	-	-	-	-	LMPR0104030004;HMDB0032064;HMDB0252457;MJDBOTE0001052	Organoheterocyclic compounds	Benzofurans	Benzofuranones	66575-29-9;3413-15-8	391.209	5.36485	M-H2O-H	C22H34O7	0	55.1	neg
neg_1647	Glycylprolylhydroxyproline	metab_8474	2.76e-07	2.17e-06	1.5395	1.5284	1.5969	0.6753	yes	-	-	-	-	-	-	-	HMDB0002171	Organic acids and derivatives	Carboxylic acids and derivatives	Amino acids, peptides, and analogues	2239-67-0	615.263	3.5958	2M+FA-H	C12H19N3O5	0	81.4	neg
pos_2816	Gibberellin A15	metab_7721	4.06e-13	1.5e-10	1.5391	1.5344	0.591	-0.7589	yes	C11860	-	-	map01100;map00904;map01110	Metabolic pathways;Diterpenoid biosynthesis;Biosynthesis of secondary metabolites	Metabolism;Metabolism;Metabolism	Global and overview maps;Metabolism of terpenoids and polyketides;Global and overview maps	LMPR0104170017;HMDB0303456	Lipids and lipid-like molecules	Prenol lipids	Diterpenoids	-	353.17	4.41453	M+Na	C20H26O4	0	53.2	pos
pos_2474	Avermectin A1a	metab_1629	0.001069	0.001785	1.5378	1.5451	3.0844	1.625	yes	C11984	-	-	map01052;map01100;map00522;map01110	Type I polyketide structures;Metabolic pathways;Biosynthesis of 12-, 14- and 16-membered macrolides;Biosynthesis of secondary metabolites	Metabolism;Metabolism;Metabolism;Metabolism	Metabolism of terpenoids and polyketides;Global and overview maps;Metabolism of terpenoids and polyketides;Global and overview maps	HMDB0242563;LMPK04000025	Phenylpropanoids and polyketides	Macrolides and analogues	Not Available	65195-51-9	444.259	3.5606	M+2H	C49H74O14	0	56.7	pos
pos_1116	LysoPE(18:2(9Z,12Z)/0:0)	metab_131	0.02143	0.02707	1.5371	1.5361	1.6665	0.7368	yes	-	-	-	-	-	-	-	HMDB0011507	Lipids and lipid-like molecules	Glycerophospholipids	Glycerophosphoethanolamines	85046-18-0	478.293	6.63155	M+H, M+Na	C23H44NO7P	0	83.6	pos
neg_5426	D-Pantothenoyl-L-cysteine	metab_12656	0.009675	0.01282	1.5367	1.5864	2.3658	1.2423	yes	C04079	-	-	map00770	Pantothenate and CoA biosynthesis	Metabolism	Metabolism of cofactors and vitamins	PW_C002959;HMDB0006834	Organic acids and derivatives	Peptidomimetics	Hybrid peptides	-	303.102	5.18383	M-H2O-H	C12H22N2O6S	0	36.5	neg
neg_3443	Tetracosapentenoic acid	metab_10461	5.28e-07	3.59e-06	1.5361	1.5264	0.6439	-0.635	yes	-	-	-	-	-	-	-	HMDB0258880	Lipids and lipid-like molecules	Fatty Acyls	Fatty acids and conjugates	-	403.285	6.51547	M+FA-H	C24H38O2	0	87	neg
neg_1966	Cysteinyl-Tyrosine	metab_8828	0.0008605	0.00146	1.5361	1.5102	0.4998	-1.0006	yes	-	-	-	-	-	-	-	HMDB0028787	Organic acids and derivatives	Carboxylic acids and derivatives	Amino acids, peptides, and analogues	-	319.052	4.02132	M+Cl	C12H16N2O4S	0	49.5	neg
pos_5099	Momordicoside L	metab_4513	0.0002599	0.0005077	1.5336	1.5482	1.776	0.8286	yes	-	-	-	-	-	-	-	HMDB0035917	Lipids and lipid-like molecules	Steroids and steroid derivatives	Cucurbitacins	81348-83-6	679.383	5.97178	M+2Na-H	C36H58O9	0	71.8	pos
neg_2724	Citrusin III	metab_9666	2.74e-11	2.44e-09	1.533	1.5306	1.5879	0.6671	yes	-	-	-	-	-	-	-	HMDB0303682	Organic acids and derivatives	Carboxylic acids and derivatives	Amino acids, peptides, and analogues	-	762.353	5.29132	M+Cl	C36H53N7O9	0	77.1	neg
neg_251	(His(1-ME)2)-trh	metab_9429	0.01132	0.01478	1.5318	1.571	2.1913	1.1318	yes	-	-	-	-	-	-	-	HMDB0246180	Organic acids and derivatives	Carboxylic acids and derivatives	Amino acids, peptides, and analogues	-	421.183	4.24918	M-H, M+FA-H	C17H24N6O4	0	60.1	neg
pos_7162	Laninamivir	metab_6793	4.04e-08	3.73e-07	1.5316	1.5298	1.5989	0.6771	yes	C21557	-	-	-	-	-	-	HMDB0253972	Organic acids and derivatives	Carboxylic acids and derivatives	Carboxylic acid derivatives	203120-17-6	388.182	2.57222	M+ACN+H	C13H22N4O7	0	40.5	pos
pos_1128	3-Hydroxytetradecanoyl carnitine	metab_144	3e-07	1.64e-06	1.5293	1.5197	0.65	-0.6214	yes	-	-	-	-	-	-	-	HMDB0061640	Lipids and lipid-like molecules	Fatty Acyls	Fatty acid esters	282523-64-2	426.261	6.5759	M+H-2H2O, M+K	C21H41NO5	0	45.3	pos
neg_7358	Hydroxyprolyl-Gamma-glutamate	metab_14790	0.001251	0.002041	1.529	1.5365	1.8478	0.8858	yes	-	-	-	-	-	-	-	HMDB0028877	Organic acids and derivatives	Carboxylic acids and derivatives	Amino acids, peptides, and analogues	-	304.115	0.993033	M+FA-H	C10H17N3O5	0	69.1	neg
pos_6510	Diphenoxylate	metab_7712	0.0004628	0.0008484	1.5286	1.5309	1.6408	0.7144	yes	C07871	-	-	-	-	-	-	PW_C009506;HMDB0251256;HMDB0015213	Benzenoids	Benzene and substituted derivatives	Diphenylacetonitriles	915-30-0	417.234	3.41607	M+H-2H2O	C30H32N2O2	0	31.7	pos
pos_2675	Tyrosine methylester	metab_1849	1.98e-06	7.73e-06	1.5285	1.5204	1.6483	0.7209	yes	C03404	-	-	-	-	-	-	HMDB0029217	Organic acids and derivatives	Carboxylic acids and derivatives	Amino acids, peptides, and analogues	1080-06-4	237.123	4.02797	M+ACN+H	C10H13NO3	0	43.2	pos
neg_5254	2-Hydroxypropyl octanoate	metab_12466	4.1e-05	0.0001125	1.5282	1.5107	0.5847	-0.7742	yes	-	-	-	-	-	-	-	HMDB0245164	Lipids and lipid-like molecules	Fatty Acyls	Fatty acid esters	-	247.155	5.43392	M+FA-H	C11H22O3	0	40.1	neg
pos_2888	5-O-Methylembelin	metab_2083	3.54e-10	1.24e-08	1.5279	1.5225	0.5854	-0.7724	yes	C10373	-	-	-	-	-	-	LMPK15050007;HMDB0040867	Organic oxygen compounds	Organooxygen compounds	Carbonyl compounds	56005-10-8	353.17	4.61572	M+2Na-H	C18H28O4	0	36.9	pos
pos_1934	Ile Asp Asn	metab_1034	6.97e-07	3.29e-06	1.5277	1.5289	1.589	0.6681	yes	-	-	-	-	-	-	-	-	-	-	-	-	361.172	1.78157	M+H	C14H24N4O7	54.3	0	pos
neg_2138	L-Proline, 1-(1-L-leucyl-L-prolyl)-	metab_9019	2.52e-08	3.19e-07	1.5276	1.5266	1.6773	0.7462	yes	-	-	-	-	-	-	-	HMDB0253022	Organic acids and derivatives	Carboxylic acids and derivatives	Amino acids, peptides, and analogues	-	324.193	4.24918	M-H	C16H27N3O4	0	48	neg
neg_4775	Cyclohexanecarboxylic acid	metab_11934	3.3e-07	2.48e-06	1.5265	1.5222	0.6038	-0.7278	yes	C09822	-	-	map01100;map00362;map01120	Metabolic pathways;Benzoate degradation;Microbial metabolism in diverse environments	Metabolism;Metabolism;Metabolism	Global and overview maps;Xenobiotics biodegradation and metabolism;Global and overview maps	HMDB0031342	Organic acids and derivatives	Carboxylic acids and derivatives	Carboxylic acids	98-89-5	315.181	5.98617	2M+Hac-H	C7H12O2	0	34.8	neg
pos_5276	Cholylglutamic acid	metab_4709	2.16e-06	8.31e-06	1.5261	1.5248	1.7732	0.8264	yes	-	-	-	-	-	-	-	HMDB0242384	Not Available	Not Available	Not Available	-	502.316	5.73148	M+H-2H2O	C29H47NO8	0	70.8	pos
pos_5418	Enterolactone	metab_4866	1.7e-07	1.06e-06	1.526	1.5203	0.5534	-0.8537	yes	C18165	-	-	-	-	-	-	HMDB0006101	Lignans, neolignans and related compounds	Furanoid lignans	Tetrahydrofuran lignans	78473-71-9;185254-87-9	281.117	5.41047	M+H-H2O	C18H18O4	0	71.7	pos
neg_2211	Oripavine	metab_9100	4.38e-06	1.84e-05	1.5256	1.5281	1.8896	0.918	yes	C06175	-	-	map00950;map01110	Isoquinoline alkaloid biosynthesis;Biosynthesis of secondary metabolites	Metabolism;Metabolism	Biosynthesis of other secondary metabolites;Global and overview maps	HMDB0030251	Alkaloids and derivatives	Morphinans	Not Available	467-04-9	318.109	4.39088	M+Na-2H	C18H19NO3	0	33.7	neg
neg_7087	(3R,5S)-1-pyrroline-3-hydroxy-5-carboxylic Acid	metab_14494	2.89e-05	8.54e-05	1.5249	1.5292	1.7956	0.8445	yes	C04281	-	-	map01100;map00330	Metabolic pathways;Arginine and proline metabolism	Metabolism;Metabolism	Global and overview maps;Amino acid metabolism	HMDB0062585	Organic acids and derivatives	Carboxylic acids and derivatives	Amino acids, peptides, and analogues	-	386.12	3.20182	3M-H	C5H7NO3	0	41.9	neg
neg_6443	Camonagrel	metab_13781	4.93e-07	3.42e-06	1.5248	1.5174	0.6039	-0.7276	yes	-	-	-	-	-	-	-	HMDB0249574	Benzenoids	Indanes	Not Available	-	307.086	3.82435	M+Cl	C15H16N2O3	0	32.7	neg
pos_612	Val Leu Ser Pro Ala	metab_5640	0.0001401	0.0002958	1.5242	1.5033	1.5604	0.6419	yes	-	-	-	-	-	-	-	-	-	-	-	-	486.292	3.84197	M+H, M+Na	C22H39N5O7	32	0	pos
neg_3181	Riesling acetal	metab_10171	1e-06	5.85e-06	1.5241	1.5191	0.6106	-0.7118	yes	-	-	-	-	-	-	-	HMDB0037562	Organoheterocyclic compounds	Tetrahydrofurans	Not Available	-	271.155	6.0095	M+FA-H	C13H22O3	0	79.1	neg
pos_4911	Menthyl pyrrolidone carboxylate	metab_4308	2.62e-05	6.83e-05	1.5221	1.5081	0.636	-0.6528	yes	C03962	-	-	-	-	-	-	HMDB0032368	Lipids and lipid-like molecules	Prenol lipids	Terpene glycosides	52528-10-6	360.238	6.12315	M+ACN+H	C16H30O6	0	56.3	pos
neg_2423	Cenisertib	metab_9333	5.05e-07	3.47e-06	1.5218	1.5097	1.6865	0.754	yes	-	-	-	-	-	-	-	HMDB0249799	Organoheterocyclic compounds	Diazinanes	Piperazines	-	472.224	4.76547	M+Na-2H	C24H30FN7O	0	38.9	neg
pos_5428	Prostaglandin PGE2 glyceryl ester	metab_4877	0.0001758	0.0003603	1.5217	1.5298	1.8606	0.8957	yes	-	-	-	-	-	-	-	HMDB0013045	Lipids and lipid-like molecules	Fatty Acyls	Eicosanoids	-	490.276	5.38645	M+ACN+Na	C23H38O7	0	41.8	pos
pos_2968	VASICINONE	metab_2172	1.5e-09	3.51e-08	1.5203	1.513	0.5697	-0.8117	yes	C10744	-	-	-	-	-	-	HMDB0259770	Organoheterocyclic compounds	Diazanaphthalenes	Benzodiazines	486-64-6	235.108	4.88107	M+CH3OH+H	C11H10N2O2	0	59.4	pos
pos_419	LysoPA(a-13:0/0:0)	metab_3512	0.001204	0.001981	1.5199	1.5344	1.6253	0.7007	yes	-	-	-	-	-	-	-	HMDB0114760	Lipids and lipid-like molecules	Glycerophospholipids	Glycerophosphates	-	407.159	2.70018	M+Na, M+K	C16H33O7P	0	35.4	pos
pos_5327	N2-gamma-L-Glutamyl-L-arginine	metab_4765	2.2e-07	1.28e-06	1.5199	1.5176	0.6557	-0.6089	yes	-	-	-	-	-	-	-	HMDB0029143;HMDB0303468	Organic acids and derivatives	Carboxylic acids and derivatives	Amino acids, peptides, and analogues	31106-03-3	607.312	5.6116	2M+H	C11H21N5O5	0	31	pos
neg_2626	Diethylaminoethyl-Sephacel	metab_9558	0.001057	0.001761	1.5193	1.5209	1.875	0.9069	yes	-	-	-	-	-	-	-	HMDB0251243	Organic oxygen compounds	Organooxygen compounds	Carbohydrates and carbohydrate conjugates	-	415.22	5.13875	M+K-2H	C18H38N2O6	0	46	neg
pos_910	Becocalcidiol	metab_7596	0.008411	0.01147	1.517	1.5016	0.584	-0.776	yes	-	-	-	-	-	-	-	HMDB0248927	Lipids and lipid-like molecules	Steroids and steroid derivatives	Vitamin D and derivatives	-	327.268	6.40885	M+H-H2O, M+H	C23H36O2	0	42.3	pos
pos_6229	N-(3-methoxyphenyl)-2-(3-propan-2-yl-1,2-oxazol-5-yl)pyrrolidine-1-carboxamide	metab_5761	4.59e-08	4.06e-07	1.5144	1.5182	0.5476	-0.8688	yes	-	-	-	-	-	-	-	-	-	-	-	-	330.184	3.84197	M+H	C18H23N3O3	52.9	0	pos
neg_4777	11-Hydroxy-9-tridecenoic acid	metab_11936	6.93e-07	4.46e-06	1.5134	1.5026	0.6412	-0.6412	yes	-	-	-	-	-	-	-	HMDB0035881;LMFA01050437	Lipids and lipid-like molecules	Fatty Acyls	Fatty acids and conjugates	105798-56-9	273.171	5.98617	M+FA-H	C13H24O3	0	59.3	neg
neg_1499	3-Fucosyllactose	metab_8310	1.24e-11	1.67e-09	1.5133	1.5105	1.6176	0.6939	yes	-	-	-	-	-	-	-	HMDB0002094	Organic oxygen compounds	Organooxygen compounds	Carbohydrates and carbohydrate conjugates	41312-47-4	469.157	3.42228	M-H2O-H	C18H32O15	0	56.7	neg
pos_1937	5'-Deoxy-5-fluorouridine	metab_1037	0.002857	0.004284	1.5124	1.5337	1.7013	0.7666	yes	C12739	-	-	map00983	Drug metabolism - other enzymes	Metabolism	Xenobiotics biodegradation and metabolism	PW_C040484;HMDB0060406	Nucleosides, nucleotides, and analogues	5''-deoxyribonucleosides	Not Available	3094-09-05	279.101	1.80538	M+CH3OH+H	C9H11FN2O5	0	45.1	pos
neg_2434	N-Methoxysuccinyl-Ala-Ala-Pro-Val	metab_9345	1.15e-10	6.06e-09	1.512	1.5086	1.7584	0.8143	yes	-	-	-	-	-	-	-	HMDB0255168	Organic acids and derivatives	Carboxylic acids and derivatives	Amino acids, peptides, and analogues	-	469.23	4.78798	M-H	C21H34N4O8	0	40	neg
pos_1117	4a-Carboxy-4b-methyl-5a-cholesta-8,24-dien-3b-ol	metab_132	7.87e-10	2.2e-08	1.5102	1.5041	0.7309	-0.4522	yes	C15808	-	-	map01100;map01110;map00100	Metabolic pathways;Biosynthesis of secondary metabolites;Steroid biosynthesis	Metabolism;Metabolism;Metabolism	Global and overview maps;Global and overview maps;Lipid metabolism	HMDB0062383;HMDB0001181	Lipids and lipid-like molecules	Prenol lipids	Triterpenoids	-	443.352	6.63155	M+H-H2O, M+H	C29H46O3	0	65.6	pos
neg_7374	Glutamylglutamic acid	metab_14808	4.44e-05	0.0001199	1.5094	1.5147	1.6174	0.6937	yes	C01425	-	-	-	-	-	-	HMDB0028818	Organic acids and derivatives	Carboxylic acids and derivatives	Amino acids, peptides, and analogues	3929-61-1	275.089	0.969533	M-H	C10H16N2O7	0	43.1	neg
pos_5524	(2-Mercaptomethyl-3-phenyl-propionyl)-glycine	metab_4981	8.51e-06	2.63e-05	1.5091	1.5127	1.7337	0.7939	yes	C01619	-	-	-	-	-	-	HMDB0242473	Organic acids and derivatives	Carboxylic acids and derivatives	Amino acids, peptides, and analogues	-	295.111	5.20177	M+ACN+H	C12H15NO3S	0	35	pos
pos_5022	Gibberellin A14	metab_4432	3.76e-05	9.34e-05	1.5085	1.4931	0.5785	-0.7895	yes	C11858	-	-	map01100;map00904;map01110	Metabolic pathways;Diterpenoid biosynthesis;Biosynthesis of secondary metabolites	Metabolism;Metabolism;Metabolism	Global and overview maps;Metabolism of terpenoids and polyketides;Global and overview maps	HMDB0303454;LMPR0104170015	Lipids and lipid-like molecules	Prenol lipids	Diterpenoids	4955-22-0	381.227	6.04348	M+CH3OH+H	C20H28O5	0	34.1	pos
neg_3111	4-Hydroxyandrostenedione glucuronide	metab_10094	0.0009813	0.001646	1.5074	1.4975	1.9196	0.9408	yes	C11455	-	-	map01100;map01110;map00100	Metabolic pathways;Biosynthesis of secondary metabolites;Steroid biosynthesis	Metabolism;Metabolism;Metabolism	Global and overview maps;Global and overview maps;Lipid metabolism	LMST05010040;HMDB0010315	Lipids and lipid-like molecules	Steroids and steroid derivatives	Cholestane steroids	-	477.213	5.93142	M-H	C25H34O9	0	67.4	neg
neg_60	2-Deoxycastasterone	metab_13291	1.4e-06	7.55e-06	1.5074	1.5026	0.6839	-0.5481	yes	C15793	-	-	map01100;map00905;map01110	Metabolic pathways;Brassinosteroid biosynthesis;Biosynthesis of secondary metabolites	Metabolism;Metabolism;Metabolism	Global and overview maps;Metabolism of terpenoids and polyketides;Global and overview maps	HMDB0034423	Lipids and lipid-like molecules	Steroids and steroid derivatives	Bile acids, alcohols and derivatives	87734-68-7	447.348	6.53893	M+Cl, M+FA-H, M-H	C28H48O4	0	38.2	neg
pos_4192	LysoPC(17:0/0:0)	metab_3515	1.01e-11	1.01e-09	1.5073	1.5037	1.4477	0.5337	yes	C04230	Lipids	Phospholipids	map00564;map05231	Glycerophospholipid metabolism;Choline metabolism in cancer	Metabolism;Human Diseases	Lipid metabolism;Cancer: overview	HMDB0012108	Lipids and lipid-like molecules	Glycerophospholipids	Glycerophosphocholines	50930-23-9	510.355	7.3943	M+H	C25H52NO7P	0	79.9	pos
neg_7129	4-(Methylnitrosamino)-1-(3-pyridyl)-1-butanol glucuronide	metab_14540	9.49e-05	0.0002218	1.5062	1.5084	1.6823	0.7504	yes	C19605	-	-	map05204;map00980	Chemical carcinogenesis - DNA adducts;Metabolism of xenobiotics by cytochrome P450	Human Diseases;Metabolism	Cancer: overview;Xenobiotics biodegradation and metabolism	HMDB0060383	Lipids and lipid-like molecules	Fatty Acyls	Fatty acyl glycosides	131119-04-5	366.13	3.0758	M-H2O-H	C16H23N3O8	0	35.1	neg
pos_47	4-Hydroxyproline galactoside	metab_4073	1.34e-07	8.73e-07	1.5062	1.4972	0.7122	-0.4897	yes	-	-	-	-	-	-	-	HMDB0029354	Lipids and lipid-like molecules	Fatty Acyls	Fatty alcohol esters	80185-44-0	276.108	2.51633	M+H-H2O, M+H, M+Na, M+K	C11H19NO8	0	54.5	pos
neg_6600	2,4-Quinolinediol	metab_13955	2.81e-09	6.02e-08	1.5061	1.4973	0.5943	-0.7507	yes	C16716	-	-	map01063	Biosynthesis of alkaloids derived from shikimate pathway	Metabolism	Chemical structure transformation maps	HMDB0245468	Organoheterocyclic compounds	Quinolines and derivatives	Quinolones and derivatives	-	206.045	3.65065	M+FA-H	C9H7NO2	0	60	neg
pos_2630	Delta-CEHC	metab_1801	6.46e-07	3.1e-06	1.5059	1.4961	0.5866	-0.7695	yes	-	-	-	-	-	-	-	HMDB0242106	Organoheterocyclic compounds	Benzopyrans	1-benzopyrans	-	251.128	3.9393	M+H	C14H18O4	55.7	0	pos
neg_1260	Edivoxetine	metab_8046	0.0002816	0.0005484	1.5054	1.5143	1.6254	0.7008	yes	-	-	-	-	-	-	-	HMDB0251701	Benzenoids	Phenol ethers	Anisoles	-	374.157	3.0444	M+Cl	C18H26FNO4	0	35.9	neg
pos_6401	13-HODE	metab_5953	0.007063	0.009776	1.5051	1.4884	0.2305	-2.1171	yes	C14762	-	-	map00591;map03320	Linoleic acid metabolism;PPAR signaling pathway	Metabolism;Organismal Systems	Lipid metabolism;Endocrine system	LMFA02000228;HMDB0004667;HMDB0242324	Lipids and lipid-like molecules	Fatty Acyls	Lineolic acids and derivatives	29623-28-7	319.223	3.5846	M+Na	C18H32O3	0	44.8	pos
pos_1824	METHACHOLINE	metab_913	6.55e-07	3.12e-06	1.5039	1.4969	0.6691	-0.5796	yes	C07471	-	-	-	-	-	-	HMDB0015654	Organic nitrogen compounds	Organonitrogen compounds	Quaternary ammonium salts	55-92-5	160.133	0.992917	M+H	C8H17NO2	35.4	0	pos
neg_5609	Merodesmosine	metab_12859	5.09e-06	2.08e-05	1.5026	1.4964	1.562	0.6434	yes	-	-	-	-	-	-	-	HMDB0030407	Organic acids and derivatives	Carboxylic acids and derivatives	Amino acids, peptides, and analogues	17096-97-8	383.23	4.90363	M-H2O-H	C18H34N4O6	0	42	neg
neg_2076	2-Ethylsuberic acid	metab_8950	0.0001498	0.0003246	1.5021	1.4983	0.4611	-1.1168	yes	-	-	-	-	-	-	-	HMDB0059708	Lipids and lipid-like molecules	Fatty Acyls	Fatty acids and conjugates	3971-33-3	247.118	4.163	M+FA-H	C10H18O4	0	55.5	neg
neg_48	Isofloxythepin	metab_11961	0.001375	0.002219	1.5012	1.5127	1.8057	0.8525	yes	-	-	-	-	-	-	-	HMDB0253639	Organoheterocyclic compounds	Benzothiepins	Dibenzothiepins	-	445.195	3.2331	M+Na-2H, M+FA-H, M-H	C23H29FN2OS	0	41.9	neg
pos_5896	2-alpha-Ethoxydihydrophytuberin	metab_5390	3.74e-08	3.52e-07	1.4994	1.4922	0.6248	-0.6786	yes	-	-	-	-	-	-	-	HMDB0302961	Lipids and lipid-like molecules	Prenol lipids	Sesquiterpenoids	-	358.258	4.43052	M+NH4	C19H32O5	0	39.4	pos
pos_5654	Norlaudanosoline	metab_7744	3.56e-07	1.9e-06	1.4994	1.491	0.6233	-0.682	yes	C02916	-	-	map00950;map01110	Isoquinoline alkaloid biosynthesis;Biosynthesis of secondary metabolites	Metabolism;Metabolism	Biosynthesis of other secondary metabolites;Global and overview maps	HMDB0012486	Organoheterocyclic compounds	Isoquinolines and derivatives	Benzylisoquinolines	57073-15-1;4747-99-3	305.149	4.93772	M+NH4	C16H17NO4	0	60.1	pos
neg_5551	16-Ketoestradiol	metab_12795	0.0002992	0.000575	1.499	1.5102	2.0077	1.0056	yes	C14383	-	-	-	-	-	-	HMDB0000406;LMST02010047	Lipids and lipid-like molecules	Steroids and steroid derivatives	Estrane steroids	566-75-6	307.13	4.99305	M+Na-2H	C18H22O3	0	52.7	neg
pos_7388	Niacinamide	metab_7038	2.27e-05	6.05e-05	1.4982	1.5053	0.6215	-0.6862	yes	C00153	Vitamins and cofactors	Vitamins	map01100;map04212;map01240;map04977;map00760	Metabolic pathways;Longevity regulating pathway - worm;Biosynthesis of cofactors;Vitamin digestion and absorption;Nicotinate and nicotinamide metabolism	Metabolism;Organismal Systems;Metabolism;Organismal Systems;Metabolism	Global and overview maps;Aging;Global and overview maps;Digestive system;Metabolism of cofactors and vitamins	PW_C001086;HMDB0001406	Organoheterocyclic compounds	Pyridines and derivatives	Pyridinecarboxylic acids and derivatives	98-92-0	123.055	1.25467	M+H	C6H6N2O	56.5	0	pos
neg_1258	Fumagillin	metab_8043	9.25e-05	0.0002166	1.4971	1.5039	0.6183	-0.6936	yes	C09668	-	-	-	-	-	-	LMPR0103060003;HMDB0242599;MJDBOTE0001216	Lipids and lipid-like molecules	Fatty Acyls	Fatty acids and conjugates	23110-15-8	495.183	3.02088	M+K-2H	C26H34O7	0	35.3	neg
neg_746	Sulfolithocholic acid	metab_14902	2.95e-11	2.58e-09	1.4963	1.491	1.5998	0.6779	yes	-	-	-	-	-	-	-	LMST05020015;HMDB0000907	Lipids and lipid-like molecules	Steroids and steroid derivatives	Bile acids, alcohols and derivatives	34669-57-3	455.251	4.02917	M-H, M+Cl	C24H40O6S	0	30.5	neg
neg_4414	Secasterone	metab_11535	5.22e-07	3.57e-06	1.4952	1.4951	0.6708	-0.5761	yes	-	-	-	-	-	-	-	HMDB0040999	Lipids and lipid-like molecules	Steroids and steroid derivatives	Ergostane steroids	164321-81-7	491.338	6.47633	M+FA-H	C28H46O4	0	53.7	neg
neg_637	Prostaglandin F-main urinary metabolite	metab_13699	4.37e-07	3.11e-06	1.4949	1.4841	0.6337	-0.6582	yes	-	-	-	-	-	-	-	HMDB0256371;HMDB0258925	Lipids and lipid-like molecules	Fatty Acyls	Eicosanoids	-	341.197	5.994	M-H2O-H, M-H	C18H30O6	0	47.6	neg
pos_6082	4-Formylaminoantipyrine	metab_5598	0.004804	0.006859	1.4948	1.4687	0.2052	-2.285	yes	-	-	-	-	-	-	-	HMDB0246429	Organoheterocyclic compounds	Azoles	Pyrazoles	-	249.134	4.08397	M+NH4	C12H13N3O2	63.6	0	pos
neg_3135	3b-Hydroxy-6b-methoxy-7(11)-eremophilen-12,8a-olide	metab_10120	4.49e-10	1.51e-08	1.4947	1.4877	0.6183	-0.6937	yes	-	-	-	-	-	-	-	HMDB0040755	Lipids and lipid-like molecules	Prenol lipids	Terpene lactones	162613-64-1	315.135	5.95487	M+Cl	C16H24O4	0	64.4	neg
neg_1293	Cymorcin diglucoside	metab_8082	5.5e-11	3.89e-09	1.4939	1.4899	1.6822	0.7503	yes	-	-	-	-	-	-	-	HMDB0039386	Organic oxygen compounds	Organooxygen compounds	Carbohydrates and carbohydrate conjugates	-	471.184	3.18613	M-H2O-H	C22H34O12	0	34.1	neg
pos_1619	2-O-a-D-Galactopyranuronosyl-L-rhamnose	metab_688	3.12e-08	3.08e-07	1.4931	1.4863	0.6649	-0.5888	yes	-	-	-	-	-	-	-	HMDB0040159	Organic oxygen compounds	Organooxygen compounds	Carbohydrates and carbohydrate conjugates	6118-79-2	363.089	0.945833	M+Na, M+K	C12H20O11	0	66.3	pos
neg_476	N-Oleoyl Phenylalanine	metab_11917	0.001292	0.002098	1.4929	1.5	1.5599	0.6415	yes	-	-	-	-	-	-	-	LMFA08020092;HMDB0062336	Organic acids and derivatives	Carboxylic acids and derivatives	Amino acids, peptides, and analogues	-	428.317	6.7266	M-H, 2M-H	C27H43NO3	85	0	neg
pos_1625	Imidazoleacetic acid riboside	metab_695	0.002301	0.003522	1.4927	1.5041	1.5508	0.633	yes	C05131	-	-	map00340	Histidine metabolism	Metabolism	Amino acid metabolism	HMDB0002331	Nucleosides, nucleotides, and analogues	Imidazole ribonucleosides and ribonucleotides	Not Available	29605-99-0	276.119	0.961483	M+H, M+NH4	C10H14N2O6	0	62.1	pos
pos_6910	Isopropyl apiosylglucoside	metab_6513	7.25e-12	7.54e-10	1.4912	1.4887	1.558	0.6397	yes	-	-	-	-	-	-	-	HMDB0041513	Organic oxygen compounds	Organooxygen compounds	Carbohydrates and carbohydrate conjugates	147742-24-3	387.187	2.87382	M+CH3OH+H	C14H26O10	0	31.4	pos
neg_7062	Psoralidin	metab_14467	1.23e-05	4.25e-05	1.4906	1.4785	0.61	-0.7131	yes	C10523	-	-	-	-	-	-	HMDB0034050;LMPK12090007;MJDBOTE0001199	Phenylpropanoids and polyketides	Isoflavonoids	Coumestans	18642-23-4	357.076	3.2331	M+Na-2H	C20H16O5	0	42.2	neg
pos_6727	11-beta-Hydroxyandrosterone-3-glucuronide	metab_7694	2.24e-12	4.19e-10	1.49	1.4872	1.5583	0.64	yes	C05643	-	-	map00380	Tryptophan metabolism	Metabolism	Amino acid metabolism	HMDB0010351;LMST05010055;LMST05010030	Organoheterocyclic compounds	Indoles and derivatives	Hydroxyindoles	-	500.283	3.1052	M+NH4	C25H38O9	0	35.4	pos
pos_5023	19-Norandrostenedione	metab_4433	2.63e-07	1.48e-06	1.4894	1.4814	0.67	-0.5777	yes	C14500	-	-	-	-	-	-	HMDB0244836	Lipids and lipid-like molecules	Steroids and steroid derivatives	Estrane steroids	734-32-7	317.149	6.04348	M+2Na-H	C18H24O2	0	42.5	pos
pos_4074	LysoPE(0:0/18:0)	metab_3386	0.0001496	0.0003126	1.4892	1.5095	1.5614	0.6428	yes	-	-	-	-	-	-	-	HMDB0011129	Lipids and lipid-like molecules	Glycerophospholipids	Glycerophosphoethanolamines	899443-67-5	482.325	7.7435	M+H	C23H48NO7P	0	67	pos
neg_2465	Kukoamine B	metab_9379	8.35e-06	3.09e-05	1.4891	1.473	1.5519	0.634	yes	C17616	-	-	-	-	-	-	HMDB0060525	Benzenoids	Phenols	Benzenediols	-	511.288	4.8492	M-H2O-H	C28H42N4O6	0	34.7	neg
pos_5321	Valnemulin	metab_4759	1.22e-08	1.61e-07	1.4873	1.4821	0.6878	-0.54	yes	C12066	-	-	-	-	-	-	HMDB0259752	Lipids and lipid-like molecules	Prenol lipids	Diterpenoids	101312-92-9	609.328	5.62757	M+2Na-H	C31H52N2O5S	0	35.8	pos
pos_4982	Momilactone A	metab_4386	3.19e-09	5.93e-08	1.487	1.4852	0.6393	-0.6455	yes	C18015	-	-	map01110;map00904	Biosynthesis of secondary metabolites;Diterpenoid biosynthesis	Metabolism;Metabolism	Global and overview maps;Metabolism of terpenoids and polyketides	LMPR0104080002;HMDB0036748	Phenylpropanoids and polyketides	2-arylbenzofuran flavonoids	Not Available	51415-07-7	359.16	6.07533	M+2Na-H	C20H26O3	0	30.7	pos
neg_5369	Prolylphenylalanine	metab_12592	3.76e-05	0.0001048	1.4852	1.4914	1.9044	0.9293	yes	-	-	-	-	-	-	-	HMDB0011179	Organic acids and derivatives	Carboxylic acids and derivatives	Amino acids, peptides, and analogues	13589-02-1	307.13	5.27165	M+FA-H	C14H18N2O3	0	48.2	neg
neg_4716	18-HEPE	metab_11869	5.04e-08	5.63e-07	1.4847	1.48	0.632	-0.6621	yes	C18177	-	-	-	-	-	-	HMDB0062222;HMDB0012611	Lipids and lipid-like molecules	Fatty Acyls	Eicosanoids	-	363.218	6.04047	M+FA-H	C20H30O3	51.3	0	neg
neg_7315	N-Acetyl-9-O-acetylneuraminic acid	metab_14745	0.0003104	0.0005936	1.4845	1.4661	1.5391	0.6221	yes	-	-	-	-	-	-	-	HMDB0000794	Organic oxygen compounds	Organooxygen compounds	Carbohydrates and carbohydrate conjugates	55717-54-9	350.109	1.24373	M-H	C13H21NO10	0	46.2	neg
neg_2581	Cyclosquamosin B	metab_9508	3.5e-10	1.33e-08	1.4834	1.482	1.4949	0.58	yes	-	-	-	-	-	-	-	HMDB0303368	Organic acids and derivatives	Carboxylic acids and derivatives	Amino acids, peptides, and analogues	-	872.428	5.06263	M+Na-2H	C39H65N9O10S	0	73.2	neg
pos_5866	4-Hydroxyhexanoycarnitine	metab_5357	9.65e-06	2.92e-05	1.483	1.4758	0.6171	-0.6965	yes	-	-	-	-	-	-	-	HMDB0241665	Lipids and lipid-like molecules	Fatty Acyls	Fatty acid esters	-	339.191	4.4872	M+ACN+Na	C13H25NO5	0	32.7	pos
neg_6679	Phyllanthusol B	metab_14041	7.55e-09	1.29e-07	1.4829	1.4767	0.6547	-0.6111	yes	-	-	-	-	-	-	-	HMDB0035904	Organic oxygen compounds	Organooxygen compounds	Carbohydrates and carbohydrate conjugates	294864-89-4	752.273	3.56445	M-H2O-H	C35H49NO18	0	94.8	neg
pos_2737	2-Chlorobenzoic acid	metab_1918	2.68e-08	2.8e-07	1.4829	1.4818	1.7066	0.7711	yes	C02357	-	-	map01220;map01120;map00364	Degradation of aromatic compounds;Microbial metabolism in diverse environments;Fluorobenzoate degradation	Metabolism;Metabolism;Metabolism	Global and overview maps;Global and overview maps;Xenobiotics biodegradation and metabolism	HMDB0245065	Benzenoids	Benzene and substituted derivatives	Benzoic acids and derivatives	118-91-2	189.033	4.20532	M+CH3OH+H	C7H5ClO2	0	34	pos
pos_7524	Glycerylphosphorylcholine	metab_7186	0.000149	0.0003116	1.4818	1.492	1.5334	0.6168	yes	C00670	-	-	map00565;map00564;map05231	Ether lipid metabolism;Glycerophospholipid metabolism;Choline metabolism in cancer	Metabolism;Metabolism;Human Diseases	Lipid metabolism;Lipid metabolism;Cancer: overview	HMDB0000086;HMDB0252858	Lipids and lipid-like molecules	Glycerophospholipids	Glycerophosphocholines	28319-77-9	280.092	0.859383	M+Na	C8H20NO6P	0	54.8	pos
pos_7293	Ectoine	metab_6933	5.99e-05	0.0001392	1.4815	1.4819	1.4861	0.5715	yes	C06231	-	-	map01100;map01120;map00260	Metabolic pathways;Microbial metabolism in diverse environments;Glycine, serine and threonine metabolism	Metabolism;Metabolism;Metabolism	Global and overview maps;Global and overview maps;Amino acid metabolism	HMDB0240650;MJDBOTE0001351	Organic acids and derivatives	Carboxylic acids and derivatives	Amino acids, peptides, and analogues	96702-03-3	326.182	1.76557	2M+ACN+H	C6H10N2O2	0	35.9	pos
neg_5166	2-(Dimethylamino)phenol	metab_12368	1.3e-09	3.26e-08	1.4815	1.4776	0.5493	-0.8643	yes	-	-	-	-	-	-	-	HMDB0245103	Organic nitrogen compounds	Organonitrogen compounds	Amines	-	136.076	5.5711	M-H	C8H11NO	0	37	neg
neg_5300	Physagulin D	metab_12517	3.32e-08	4.01e-07	1.4804	1.4819	1.7038	0.7687	yes	-	-	-	-	-	-	-	HMDB0041049;LMST01160046	Lipids and lipid-like molecules	Steroids and steroid derivatives	Steroid lactones	146713-92-0	619.346	5.35798	M-H	C34H52O10	0	39	neg
neg_3408	7a,12a-Dihydroxy-5b-cholestan-3-one	metab_10422	1.03e-06	5.97e-06	1.4804	1.4768	0.6763	-0.5644	yes	C05453	-	-	map01100;map00120	Metabolic pathways;Primary bile acid biosynthesis	Metabolism;Metabolism	Global and overview maps;Lipid metabolism	HMDB0006887;PW_C002989	Lipids and lipid-like molecules	Glycerolipids	Diradylglycerols	-	463.343	6.46068	M+FA-H	C27H46O3	0	30.7	neg
pos_3472	Hydromorphone	metab_2727	1.6e-07	1.01e-06	1.4792	1.4779	0.6998	-0.5151	yes	C07042	-	-	-	-	-	-	HMDB0014472;PW_C008858	Alkaloids and derivatives	Morphinans	Not Available	466-99-9	303.17	6.22658	M+NH4	C17H19NO3	0	32.8	pos
neg_4431	24,24-Difluoro-1alpha,25-dihydroxyvitamin D3	metab_11554	1.94e-08	2.64e-07	1.4786	1.4705	0.664	-0.5907	yes	-	-	-	-	-	-	-	HMDB0242645;LMST03020145	Lipids and lipid-like molecules	Steroids and steroid derivatives	Vitamin D and derivatives	-	433.296	6.45287	M-H2O-H	C27H42F2O3	0	63.5	neg
neg_7086	Carmofur	metab_14493	3.16e-05	9.13e-05	1.4783	1.4854	1.5817	0.6615	yes	C13252	-	-	map00983	Drug metabolism - other enzymes	Metabolism	Xenobiotics biodegradation and metabolism	HMDB0249685	Organoheterocyclic compounds	Diazines	Pyrimidines and pyrimidine derivatives	61422-45-5	559.237	3.20182	2M+FA-H	C11H16FN3O3	0	65.7	neg
neg_1706	(5Z)-(15S)-11alpha-Hydroxy-9,15-dioxoprostanoate	metab_8540	3.76e-06	1.64e-05	1.4775	1.477	0.5776	-0.7919	yes	C04671	-	-	-	-	-	-	HMDB0012481;HMDB0002776	Lipids and lipid-like molecules	Fatty Acyls	Eicosanoids	363-23-5	397.221	3.66632	M+FA-H	C20H32O5	0	48.1	neg
neg_3394	LysoPC(18:3(6Z,9Z,12Z)/0:0)	metab_10406	0.007212	0.009891	1.4748	1.53	1.8568	0.8928	yes	C04230	Lipids	Phospholipids	map00564;map05231	Glycerophospholipid metabolism;Choline metabolism in cancer	Metabolism;Human Diseases	Lipid metabolism;Cancer: overview	HMDB0010387	Lipids and lipid-like molecules	Glycerophospholipids	Glycerophosphocholines	-	562.315	6.42952	M+FA-H	C26H48NO7P	0	64	neg
pos_7360	Gln Glu Ala	metab_7008	7.74e-07	3.59e-06	1.4747	1.4753	1.4743	0.5601	yes	-	-	-	-	-	-	-	-	-	-	-	-	347.156	1.39013	M+H	C13H22N4O7	50.8	0	pos
pos_563	Thyrotropin-releasing factor	metab_5097	7.55e-06	2.37e-05	1.4745	1.479	1.5041	0.5889	yes	C03958	Hormones and transmitters	Peptide hormones	-	-	-	-	HMDB0259062;HMDB0060088;HMDB0060080	Organic acids and derivatives	Carboxylic acids and derivatives	Amino acids, peptides, and analogues	-	395.202	3.51208	M+H, M+CH3OH+H	C16H22N6O4	0	42.8	pos
pos_4398	3-beta-Hydroxy-4-beta-methyl-5-alpha-cholest-7-ene-4-alpha-carboxylate	metab_3742	5.8e-08	4.75e-07	1.4744	1.4677	0.7475	-0.4199	yes	C04840	-	-	-	-	-	-	HMDB0011662	Lipids and lipid-like molecules	Steroids and steroid derivatives	Cholestane steroids	-	427.357	6.8064	M+H-H2O	C29H48O3	0	51.1	pos
pos_227	PE(20:4/0:0)	metab_1403	0.0007477	0.001297	1.4742	1.4652	1.4305	0.5165	yes	-	-	-	-	-	-	-	LMGP02050009;HMDB0011517	Lipids and lipid-like molecules	Glycerophospholipids	Glycerophosphoethanolamines	652149-09-2	502.293	6.59972	M+H, M+Na, M+H-H2O	C25H44NO7P	66.7	0	pos
pos_5960	Isodesmosine	metab_5462	3.6e-11	2.54e-09	1.4739	1.4701	1.5548	0.6367	yes	-	-	-	-	-	-	-	HMDB0000739	Organic acids and derivatives	Carboxylic acids and derivatives	Tetracarboxylic acids and derivatives	991-01-5	590.303	4.31002	M+ACN+Na	C24H40N5O8+	0	52.3	pos
neg_2407	(3a,5b,7a,12a)-24-[(carboxymethyl)amino]-1,12-dihydroxy-24-oxocholan-3-yl-b-D-Glucopyranosiduronic acid	metab_9315	6.93e-10	2.04e-08	1.4735	1.4707	1.5112	0.5957	yes	-	-	-	-	-	-	-	HMDB0002472	Organic nitrogen compounds	Organonitrogen compounds	Oximes	99794-78-2	640.331	4.73097	M-H	C32H51NO12	0	42.6	neg
pos_6662	Gentamicin C	metab_6239	1.9e-06	7.45e-06	1.4734	1.46	1.5532	0.6352	yes	C01918	Antibiotics	Aminoglycosides	-	-	-	-	HMDB0252688	Organic oxygen compounds	Organooxygen compounds	Carbohydrates and carbohydrate conjugates	11097-82-8	472.276	3.19342	M+Na	C19H39N5O7	0	76.5	pos
pos_6416	Trans-p-Menthane-1,7,8-triol 8-glucoside	metab_5969	4.91e-06	1.66e-05	1.4732	1.4694	1.4409	0.527	yes	-	-	-	-	-	-	-	HMDB0034784	Organic oxygen compounds	Organooxygen compounds	Carbohydrates and carbohydrate conjugates	217962-29-3	383.229	3.5606	M+CH3OH+H	C16H30O8	0	42.9	pos
neg_444	Xi-3-Nonenoic acid	metab_11563	5.36e-08	5.91e-07	1.4732	1.4645	0.6657	-0.5871	yes	-	-	-	-	-	-	-	HMDB0303440	Lipids and lipid-like molecules	Fatty Acyls	Fatty acids and conjugates	-	311.223	6.39045	2M-H, 3M-H	C9H16O2	0	37.5	neg
neg_2035	9-Fluoroprednisolone	metab_8906	9.21e-10	2.49e-08	1.4729	1.4684	1.5157	0.6	yes	C14484	-	-	-	-	-	-	HMDB0040539;HMDB0247595	Phenylpropanoids and polyketides	Flavonoids	Flavonoid glycosides	124097-45-6;338-95-4	755.359	4.10033	2M-H	C21H27FO5	0	70.5	neg
neg_3049	Ginkgolide A	metab_10025	8.4e-07	5.14e-06	1.4722	1.4655	0.5745	-0.7997	yes	C07601	-	-	map01110;map01062	Biosynthesis of secondary metabolites;Biosynthesis of terpenoids and steroids	Metabolism;Metabolism	Global and overview maps;Chemical structure transformation maps	HMDB0036862;LMPR0104540001;MJDBOTE0001317	Lipids and lipid-like molecules	Prenol lipids	Sesquiterpenoids	15291-75-5	389.124	5.87652	M-H2O-H	C20H24O9	0	37.2	neg
pos_6704	2-Amino-3-hydroxy-3-phenylpropanoic acid	metab_6286	0.0002386	0.0004698	1.4704	1.4544	0.5892	-0.7632	yes	-	-	-	-	-	-	-	HMDB0244981	Organic acids and derivatives	Carboxylic acids and derivatives	Amino acids, peptides, and analogues	-	164.071	3.14508	M+H-H2O	C9H11NO3	0	63.6	pos
pos_181	Ser Ile His	metab_898	0.0002448	0.0004811	1.4701	1.4662	1.4992	0.5842	yes	-	-	-	-	-	-	-	-	-	-	-	-	356.193	1.76557	M+2H, M+H, M+ACN+H	C15H25N5O5	66.4	0	pos
pos_1940	Tyrosyl-Gamma-glutamate	metab_1041	5.2e-10	1.65e-08	1.4698	1.4655	1.5369	0.62	yes	-	-	-	-	-	-	-	HMDB0029119	Organic acids and derivatives	Carboxylic acids and derivatives	Amino acids, peptides, and analogues	-	310.14	1.82128	M+H	C14H19N3O5	0	77.8	pos
pos_3649	(+)-Dehydrovomifoliol	metab_2918	3.71e-07	1.96e-06	1.4688	1.4606	0.6681	-0.5818	yes	C02533	-	-	-	-	-	-	HMDB0302822	Lipids and lipid-like molecules	Prenol lipids	Sesquiterpenoids	-	205.122	6.8064	M+H-H2O	C13H18O3	0	78.9	pos
neg_4399	5alpha-Cyprinol	metab_11517	1.13e-08	1.75e-07	1.4687	1.4673	0.6903	-0.5346	yes	C16890	-	-	-	-	-	-	HMDB0247015	Lipids and lipid-like molecules	Steroids and steroid derivatives	Bile acids, alcohols and derivatives	2952-70-7	433.332	6.49982	M-H2O-H	C27H48O5	0	57.9	neg
neg_4034	1-Stearoylglycerophosphoserine	metab_11114	1.11e-05	3.9e-05	1.4686	1.4613	1.6615	0.7325	yes	-	-	-	-	-	-	-	HMDB0061698	Lipids and lipid-like molecules	Glycerophospholipids	Glycerophosphoserines	-	546.282	7.52318	M+Na-2H	C24H48NO9P	0	78.9	neg
pos_4708	Polypodine B	metab_4083	0.01094	0.01456	1.4682	1.4519	0.5392	-0.8911	yes	C08834	-	-	-	-	-	-	LMST01010198;HMDB0302993	Lipids and lipid-like molecules	Steroids and steroid derivatives	Bile acids, alcohols and derivatives	18069-14-2	514.337	6.32922	M+NH4	C27H44O8	0	51.6	pos
neg_6737	N2-Succinyl-L-ornithine	metab_14106	4.99e-11	3.75e-09	1.4674	1.4637	1.5743	0.6547	yes	C03415	-	-	map01100;map00330	Metabolic pathways;Arginine and proline metabolism	Metabolism;Metabolism	Global and overview maps;Amino acid metabolism	HMDB0001199	Organic acids and derivatives	Carboxylic acids and derivatives	Amino acids, peptides, and analogues	899816-95-6	523.226	3.50913	2M+Hac-H	C9H16N2O5	0	49.2	neg
neg_5829	7-Hydroxy-5-methoxy-4-methyl-3-(4-methylpiperazin-1-yl)-2H-chromen-2-one	metab_13102	1.42e-08	2.07e-07	1.4666	1.4652	0.6126	-0.7071	yes	-	-	-	-	-	-	-	HMDB0244641	Phenylpropanoids and polyketides	Coumarins and derivatives	Hydroxycoumarins	-	349.141	4.5596	M+FA-H	C16H20N2O4	0	34.1	neg
pos_7289	QUISQUALIC ACID	metab_6928	4.83e-06	1.63e-05	1.4661	1.4505	0.6214	-0.6864	yes	C08296	-	-	-	-	-	-	HMDB0257060	Organic acids and derivatives	Carboxylic acids and derivatives	Amino acids, peptides, and analogues	52809-07-1	154.025	1.77357	M+H-2H2O	C5H7N3O5	0	43.9	pos
neg_6940	Thesinine 4'-O-glucoside	metab_14331	8.74e-12	1.29e-09	1.4657	1.4625	1.5799	0.6598	yes	-	-	-	-	-	-	-	HMDB0039900	Phenylpropanoids and polyketides	Flavonoids	Flavonoid glycosides	-	494.199	3.32765	M+FA-H	C23H31NO8	0	75.4	neg
pos_6488	Bisoprolol	metab_6048	6.63e-05	0.0001521	1.4655	1.461	1.5106	0.5951	yes	C06852	-	-	-	-	-	-	PW_C009100;HMDB0014750;MJDBOTE0001331	Benzenoids	Benzene and substituted derivatives	Benzylethers	66722-44-9	389.239	3.44808	M+ACN+Na	C18H31NO4	0	36.6	pos
pos_5677	5,7-Megastigmadien-9-ol glucoside	metab_5148	2.68e-07	1.5e-06	1.4648	1.4593	0.6126	-0.7069	yes	-	-	-	-	-	-	-	HMDB0041044	Lipids and lipid-like molecules	Fatty Acyls	Fatty acyl glycosides	146610-77-7	374.253	4.88107	M+NH4	C19H32O6	0	52.3	pos
neg_6010	Leukotriene E4	metab_13304	0.0002876	0.0005575	1.4646	1.4474	1.6575	0.729	yes	C05952	Lipids	Eicosanoids	map00590;map01100;map04080;map04664	Arachidonic acid metabolism;Metabolic pathways;Neuroactive ligand-receptor interaction;Fc epsilon RI signaling pathway	Metabolism;Metabolism;Environmental Information Processing;Organismal Systems	Lipid metabolism;Global and overview maps;Signaling molecules and interaction;Immune system	LMFA03020075;HMDB0247369;PW_C001485;HMDB0002200;LMFA03020002	Lipids and lipid-like molecules	Fatty Acyls	Eicosanoids	75715-89-8	484.241	4.31257	M+FA-H	C23H37NO5S	0	76.7	neg
neg_1969	PA(10:0/8:0)	metab_8831	0.002711	0.004092	1.4644	1.4629	1.7333	0.7935	yes	C00416	Lipids	Phospholipids	map01100;map00564;map01110;map00561;map05212;map05200;map04975;map04024;map05231;map04072;map04912;map04070;map04666	Metabolic pathways;Glycerophospholipid metabolism;Biosynthesis of secondary metabolites;Glycerolipid metabolism;Pancreatic cancer;Pathways in cancer;Fat digestion and absorption;cAMP signaling pathway;Choline metabolism in cancer;Phospholipase D signaling pathway;GnRH signaling pathway;Phosphatidylinositol signaling system;Fc gamma R-mediated phagocytosis	Metabolism;Metabolism;Metabolism;Metabolism;Human Diseases;Human Diseases;Organismal Systems;Environmental Information Processing;Human Diseases;Environmental Information Processing;Organismal Systems;Environmental Information Processing;Organismal Systems	Global and overview maps;Lipid metabolism;Global and overview maps;Lipid metabolism;Cancer: specific types;Cancer: overview;Digestive system;Signal transduction;Cancer: overview;Signal transduction;Endocrine system;Signal transduction;Immune system	PW_C062193;HMDB0114778	Lipids and lipid-like molecules	Glycerophospholipids	Glycerophosphates	-	473.226	4.02132	M+Na-2H	C21H41O8P	0	37.6	neg
neg_1341	Blasticidin S	metab_8136	4.78e-05	0.0001272	1.4636	1.4649	1.4642	0.5501	yes	C02010	-	-	-	-	-	-	HMDB0030452	Organic acids and derivatives	Carboxylic acids and derivatives	Amino acids, peptides, and analogues	2079-00-7	403.183	3.24877	M-H2O-H	C17H26N8O5	0	73.8	neg
neg_1547	2'',6''-O-Diacetyloninin	metab_8363	4.38e-12	7.68e-10	1.4629	1.4582	1.5686	0.6495	yes	-	-	-	-	-	-	-	HMDB0302015	Organoheterocyclic compounds	Pteridines and derivatives	Not Available	-	461.189	3.47777	2M+FA-H	C9H12N4O2	0	49.6	neg
pos_1836	Lichenin	metab_926	1.95e-07	1.17e-06	1.4626	1.4608	0.6611	-0.597	yes	C00478	-	-	-	-	-	-	HMDB0302349	Organic oxygen compounds	Organooxygen compounds	Alcohols and polyols	1402-10-4	347.094	1.06413	2M+Na	C6H10O5	0	46.9	pos
pos_5783	Tryptophyl-Arginine	metab_5265	1.41e-10	6.35e-09	1.4614	1.4568	0.6392	-0.6457	yes	-	-	-	-	-	-	-	HMDB0029077	Organic acids and derivatives	Carboxylic acids and derivatives	Amino acids, peptides, and analogues	-	325.175	4.66372	M+H-2H2O	C17H24N6O3	0	44.6	pos
pos_5219	Leu Phe Leu	metab_4646	0.0002485	0.0004878	1.4609	1.456	1.6045	0.6822	yes	-	-	-	-	-	-	-	-	-	-	-	-	392.254	5.83597	M+H	C21H33N3O4	74.9	0	pos
pos_5768	Cichorioside N	metab_5248	5.41e-06	1.8e-05	1.4602	1.452	1.561	0.6424	yes	-	-	-	-	-	-	-	HMDB0302058	Lipids and lipid-like molecules	Prenol lipids	Terpene glycosides	-	459.26	4.69637	M+CH3OH+H	C22H34O8	0	51.4	pos
neg_4925	Daucol	metab_12100	9.95e-08	9.88e-07	1.4602	1.4548	0.6074	-0.7194	yes	C09652	-	-	-	-	-	-	HMDB0035287	Organoheterocyclic compounds	Oxanes	Not Available	887-08-1	275.14	5.89217	M+K-2H	C15H26O2	0	49.7	neg
neg_4975	Janthitrem G	metab_12155	1.27e-06	7e-06	1.4588	1.4593	1.6131	0.6898	yes	-	-	-	-	-	-	-	HMDB0030531	Organic acids and derivatives	Peptidomimetics	Depsipeptides	90986-51-9	610.357	5.85298	M-H2O-H	C39H51NO6	0	71	neg
neg_2481	Digitoxigenin bisdigitoxide	metab_9397	1.14e-07	1.1e-06	1.4571	1.4559	1.5182	0.6023	yes	-	-	-	-	-	-	-	HMDB0251275	Lipids and lipid-like molecules	Steroids and steroid derivatives	Steroid lactones	-	671.326	4.8801	M+K-2H	C35H54O10	0	62.1	neg
neg_6287	Gibberellin A8-catabolite	metab_13607	7.62e-07	4.78e-06	1.4566	1.4475	0.6208	-0.6878	yes	C11870	-	-	map00904	Diterpenoid biosynthesis	Metabolism	Metabolism of terpenoids and polyketides	HMDB0304364;LMPR0104170027	Lipids and lipid-like molecules	Prenol lipids	Diterpenoids	78791-79-4	399.086	3.98152	M+K-2H	C19H22O7	0	48.1	neg
pos_1617	Serylserine	metab_686	0.003332	0.004925	1.4556	1.4687	1.5738	0.6543	yes	-	-	-	-	-	-	-	HMDB0029048	Organic acids and derivatives	Carboxylic acids and derivatives	Amino acids, peptides, and analogues	6620-95-7	256.09	0.945833	M+H, M+ACN+Na	C6H12N2O5	0	30.7	pos
neg_5419	Acetyl-arginyl-glycyl-aspartyl-serinamide	metab_12648	0.0004618	0.0008371	1.4553	1.4693	1.7372	0.7968	yes	-	-	-	-	-	-	-	HMDB0247924	Organic acids and derivatives	Carboxylic acids and derivatives	Amino acids, peptides, and analogues	-	455.203	5.1912	M-H2O-H	C17H30N8O8	0	53.2	neg
neg_5210	Arnamiol	metab_12418	7.14e-06	2.72e-05	1.4547	1.4405	0.6529	-0.615	yes	-	-	-	-	-	-	-	HMDB0035062	Lipids and lipid-like molecules	Prenol lipids	Sesquiterpenoids	102092-23-9	487.131	5.50255	M+K-2H	C24H31ClO6	0	40.5	neg
pos_4990	Ganoderenic acid A	metab_4395	8.78e-11	4.61e-09	1.4545	1.4522	1.538	0.621	yes	-	-	-	-	-	-	-	HMDB0035381	Lipids and lipid-like molecules	Prenol lipids	Triterpenoids	100665-40-5	556.33	6.06733	M+ACN+H	C30H42O7	0	45.7	pos
pos_2791	Glu Val Ile Glu	metab_1978	5.56e-05	0.0001306	1.4537	1.4573	1.5801	0.6601	yes	-	-	-	-	-	-	-	-	-	-	-	-	489.255	4.35065	M+H	C21H36N4O9	42.2	0	pos
neg_2158	18-Oxocortisol	metab_9041	1.66e-07	1.51e-06	1.4536	1.4431	1.6417	0.7152	yes	-	-	-	-	-	-	-	HMDB0000332;LMST02030194	Lipids and lipid-like molecules	Steroids and steroid derivatives	Hydroxysteroids	2410-60-8	397.161	4.28123	M+Na-2H	C21H28O6	0	52.2	neg
neg_5055	4-Phenylpiperidine-4-carboxylic acid	metab_12245	2.07e-06	1.01e-05	1.4531	1.4537	0.5913	-0.758	yes	-	-	-	-	-	-	-	HMDB0246199	Organoheterocyclic compounds	Piperidines	Phenylpiperidines	-	455.218	5.73968	2M+FA-H	C12H15NO2	0	53.7	neg
pos_1909	Val Glu Gln	metab_1006	1.07e-05	3.17e-05	1.4529	1.4573	1.4639	0.5498	yes	-	-	-	-	-	-	-	-	-	-	-	-	375.187	1.72557	M+H	C15H26N4O7	65.3	0	pos
pos_2617	Trp Pro Asp	metab_1786	2.04e-11	1.68e-09	1.4528	1.4503	1.5631	0.6444	yes	-	-	-	-	-	-	-	-	-	-	-	-	417.177	3.89062	M+H	C20H24N4O6	45.2	0	pos
pos_221	Dihydroceramide	metab_1338	2.84e-06	1.05e-05	1.4518	1.45	0.733	-0.4481	yes	C12126	-	-	map00600;map01100;map04071	Sphingolipid metabolism;Metabolic pathways;Sphingolipid signaling pathway	Metabolism;Metabolism;Environmental Information Processing	Lipid metabolism;Global and overview maps;Signal transduction	HMDB0006752;PW_C002905;HMDB0011761	Organic acids and derivatives	Carboxylic acids and derivatives	Carboxylic acid derivatives	2304-80-5	330.3	6.45648	M+H-H2O, M+H, M+H-2H2O	C19H39NO3	0	50.1	pos
pos_6414	Difluprednate	metab_5967	1.29e-08	1.67e-07	1.4513	1.451	1.5697	0.6505	yes	C12695	-	-	-	-	-	-	HMDB0015676	Lipids and lipid-like molecules	Steroids and steroid derivatives	Pregnane steroids	23674-86-4	550.262	3.5606	M+ACN+H	C27H34F2O7	0	49.8	pos
pos_5212	Sphinganine 1-phosphate	metab_4639	2.08e-07	1.23e-06	1.4504	1.4536	0.6334	-0.6588	yes	C01120	-	-	map00600;map01100;map04080	Sphingolipid metabolism;Metabolic pathways;Neuroactive ligand-receptor interaction	Metabolism;Metabolism;Environmental Information Processing	Lipid metabolism;Global and overview maps;Signaling molecules and interaction	PW_C001070;HMDB0242462;HMDB0001383	Lipids and lipid-like molecules	Sphingolipids	Phosphosphingolipids	19794-97-9	420.228	5.84395	M+K	C18H40NO5P	0	54.9	pos
pos_5738	Lysylphenylalanine	metab_5216	9.03e-05	0.0002009	1.4501	1.4538	1.702	0.7672	yes	-	-	-	-	-	-	-	HMDB0028958;HMDB0304786	Organic acids and derivatives	Carboxylic acids and derivatives	Amino acids, peptides, and analogues	6235-35-4	316.166	4.76035	M+Na	C15H23N3O3	0	32.8	pos
pos_5731	L-Hypoglycin A	metab_5209	9.74e-08	6.91e-07	1.4498	1.4417	0.6462	-0.6298	yes	C08287	-	-	-	-	-	-	HMDB0029427	Organic acids and derivatives	Carboxylic acids and derivatives	Amino acids, peptides, and analogues	156-56-9	305.149	4.77707	2M+Na	C7H11NO2	0	47.5	pos
neg_1885	Fructose citrate	metab_8738	6.06e-07	4.01e-06	1.4496	1.4495	0.6364	-0.6519	yes	-	-	-	-	-	-	-	HMDB0252489	Organic acids and derivatives	Carboxylic acids and derivatives	Tricarboxylic acids and derivatives	-	387.019	3.90323	M+Na-2H	C12H14O13	0	43	neg
pos_2741	Threonic acid	metab_1923	5.92e-10	1.79e-08	1.4495	1.4471	0.6133	-0.7054	yes	C01620	-	-	map01100;map00053	Metabolic pathways;Ascorbate and aldarate metabolism	Metabolism;Metabolism	Global and overview maps;Carbohydrate metabolism	HMDB0000943	Organic oxygen compounds	Organooxygen compounds	Carbohydrates and carbohydrate conjugates	7306-96-9	290.106	4.21332	2M+NH4	C4H8O5	0	39.6	pos
neg_1470	Methyl 4-amino-5-ethyl-3-thiophenecarboxylate	metab_8279	5.63e-08	6.12e-07	1.4493	1.4437	0.6086	-0.7164	yes	-	-	-	-	-	-	-	HMDB0247491	Organoheterocyclic compounds	Thiophenes	Thiophene carboxylic acids and derivatives	-	184.043	3.3988	M-H	C8H11NO2S	0	32.7	neg
pos_257	PC(18:1(6Z)/0:0)	metab_1735	7.67e-06	2.4e-05	1.4491	1.4498	1.3878	0.4728	yes	-	-	-	-	-	-	-	HMDB0256159;LMGP01050029	Lipids and lipid-like molecules	Glycerophospholipids	Glycerophosphocholines	-	522.356	7.73553	M+K, M+2Na-H, M+H	C26H52NO7P	0	56.7	pos
neg_3232	CDP-DG(i-17:0/a-17:0)	metab_10227	3.4e-11	2.94e-09	1.4487	1.4443	1.4034	0.4889	yes	C00269	-	-	map01100;map00564;map01110;map04070	Metabolic pathways;Glycerophospholipid metabolism;Biosynthesis of secondary metabolites;Phosphatidylinositol signaling system	Metabolism;Metabolism;Metabolism;Environmental Information Processing	Global and overview maps;Lipid metabolism;Global and overview maps;Signal transduction	PW_C076580;HMDB0116244	Lipids and lipid-like molecules	Glycerophospholipids	CDP-glycerols	-	1002.53	6.1184	M+Na-2H	C46H85N3O15P2	0	30.5	neg
pos_5380	N-Arachidonoyl Alanine	metab_4824	3.54e-06	1.25e-05	1.4483	1.4437	0.6385	-0.6473	yes	-	-	-	-	-	-	-	HMDB0241989;LMFA08020260	Organic acids and derivatives	Carboxylic acids and derivatives	Amino acids, peptides, and analogues	-	420.248	5.48247	M+2Na-H	C23H37NO3	0	42.6	pos
pos_5282	Lyciumoside VIII	metab_4716	6.32e-07	3.06e-06	1.4468	1.4441	0.6659	-0.5866	yes	-	-	-	-	-	-	-	HMDB0033210	Lipids and lipid-like molecules	Prenol lipids	Terpene glycosides	212773-47-2	611.344	5.71548	M+H-2H2O	C32H54O13	0	50.7	pos
pos_3434	Vicriviroc	metab_2686	1.18e-06	5.05e-06	1.4467	1.4436	1.3859	0.4708	yes	-	-	-	-	-	-	-	HMDB0259804	Benzenoids	Benzene and substituted derivatives	Trifluoromethylbenzenes	-	516.299	6.13907	M+H-H2O	C28H38F3N5O2	0	53.3	pos
pos_1664	Pindolol	metab_737	0.0001203	0.0002596	1.4466	1.4418	1.4482	0.5343	yes	C07445	-	-	-	-	-	-	HMDB0015095;PW_C009401;MJDBOTE0000319	Organoheterocyclic compounds	Indoles and derivatives	Indoles	13523-86-9	287.117	1.28652	M+K, M+ACN+Na	C14H20N2O2	0	40.7	pos
pos_4478	LysoPE(20:3(11Z,14Z,17Z)/0:0)	metab_3831	0.008185	0.01119	1.4463	1.4238	1.596	0.6745	yes	-	-	-	-	-	-	-	HMDB0011514	Lipids and lipid-like molecules	Glycerophospholipids	Glycerophosphoethanolamines	-	504.308	6.67112	M+H	C25H46NO7P	0	34.2	pos
neg_6304	1-Methylcyclohexane-1,2-dicarboxylic acid	metab_13627	8.83e-07	5.34e-06	1.4461	1.4353	0.6227	-0.6833	yes	-	-	-	-	-	-	-	HMDB0243937	Organic acids and derivatives	Carboxylic acids and derivatives	Dicarboxylic acids and derivatives	-	231.087	3.96585	M+FA-H	C9H14O4	0	34.3	neg
pos_3048	17a-Ethynylestradiol	metab_2262	3.43e-09	6.3e-08	1.4454	1.4393	1.4345	0.5206	yes	C07534	-	-	-	-	-	-	HMDB0001926	Lipids and lipid-like molecules	Steroids and steroid derivatives	Estrane steroids	57-63-6	360.192	5.12177	M+ACN+Na	C20H24O2	0	61.6	pos
pos_2757	Diphenhydramine N-glucuronide	metab_1940	6.5e-07	3.11e-06	1.4444	1.4416	1.5378	0.6209	yes	-	-	-	-	-	-	-	HMDB0060897	Organic acids and derivatives	Carboxylic acids and derivatives	Amino acids, peptides, and analogues	-	474.238	4.26132	M+ACN+H	C23H30NO7+	0	44.4	pos
pos_4853	Pokeberrygenin	metab_4243	1.73e-06	6.93e-06	1.4432	1.4478	1.4802	0.5658	yes	-	-	-	-	-	-	-	HMDB0034653	Lipids and lipid-like molecules	Prenol lipids	Triterpenoids	75206-90-5	555.31	6.1868	M+K	C31H48O6	0	34.5	pos
neg_4577	Cholyltryptophan	metab_11715	0.0002653	0.0005208	1.4397	1.4216	1.4924	0.5776	yes	-	-	-	-	-	-	-	HMDB0242374	Lipids and lipid-like molecules	Steroids and steroid derivatives	Bile acids, alcohols and derivatives	-	593.36	6.25042	M-H	C35H50N2O6	0	33.1	neg
pos_2296	Sacubitril	metab_1432	0.006156	0.008609	1.4384	1.4593	1.5814	0.6612	yes	-	-	-	-	-	-	-	HMDB0257439	Benzenoids	Benzene and substituted derivatives	Biphenyls and derivatives	-	376.187	3.15305	M+H-2H2O	C24H29NO5	0	46.1	pos
neg_2873	Ubenimex	metab_9831	8.89e-10	2.42e-08	1.4381	1.4351	0.6141	-0.7034	yes	C00732	-	-	-	-	-	-	-	-	-	-	58970-76-6	307.166	5.54952	M-H	C16H24N2O4	47.4	0	neg
pos_4098	(3a,5b)-24-oxo-24-[(2-sulfoethyl)amino]cholan-3-yl-b-D-Glucopyranosiduronic acid	metab_3412	1.72e-11	1.54e-09	1.4372	1.4336	1.4319	0.518	yes	-	-	-	-	-	-	-	HMDB0002429	Lipids and lipid-like molecules	Steroids and steroid derivatives	Bile acids, alcohols and derivatives	99794-82-8	682.328	7.68803	M+Na	C32H53NO11S	0	52.4	pos
pos_3119	MG(0:0/22:5(7Z,10Z,13Z,16Z,19Z)/0:0)	metab_2341	1.03e-07	7.21e-07	1.4371	1.4371	0.625	-0.678	yes	-	-	-	-	-	-	-	LMGL01010037;HMDB0011556	Lipids and lipid-like molecules	Glycerolipids	Monoradylglycerols	-	443.254	5.32977	M+K	C25H40O4	0	47	pos
neg_4325	Sphingosine 1-phosphate (d16:1-P)	metab_11436	1.97e-05	6.18e-05	1.4368	1.4427	0.6386	-0.6471	yes	-	-	-	-	-	-	-	HMDB0060061	Organic acids and derivatives	Organic phosphoric acids and derivatives	Phosphate esters	-	701.43	6.58587	2M-H	C16H34NO5P	0	58.4	neg
neg_5668	Chymostatin	metab_12923	3.09e-10	1.22e-08	1.4356	1.4313	1.5256	0.6094	yes	C11308	-	-	-	-	-	-	HMDB0242696	Lipids and lipid-like molecules	Steroids and steroid derivatives	Vitamin D and derivatives	9076-44-2	588.289	4.81148	M-H2O-H	C31H41N7O6	0	72.6	neg
neg_1509	Chloramphenicol palmitate	metab_8322	5.22e-05	0.0001364	1.4355	1.4359	1.5646	0.6458	yes	C11726	-	-	-	-	-	-	HMDB0250087	Benzenoids	Benzene and substituted derivatives	Nitrobenzenes	530-43-8	605.244	3.43075	M+FA-H	C27H42Cl2N2O6	0	40.3	neg
neg_5054	Tyr-Gly-Gly-Trp-Leu	metab_12244	0.0001837	0.0003836	1.4352	1.4206	1.6332	0.7077	yes	-	-	-	-	-	-	-	HMDB0259342	Organic acids and derivatives	Carboxylic acids and derivatives	Amino acids, peptides, and analogues	-	615.257	5.73968	M+Na-2H	C30H38N6O7	0	75.7	neg
neg_761	Prolyl-Histidine	metab_15069	5.8e-06	2.31e-05	1.4345	1.4223	0.6266	-0.6743	yes	-	-	-	-	-	-	-	HMDB0029019	Organic acids and derivatives	Carboxylic acids and derivatives	Amino acids, peptides, and analogues	-	233.103	3.87193	M-H2O-H, M+Na-2H	C11H16N4O3	0	39.1	neg
pos_3822	13,16,19-Docosatrienoic acid	metab_3107	9.64e-08	6.88e-07	1.4345	1.43	1.6213	0.6971	yes	C16534	-	-	-	-	-	-	LMFA01030407;HMDB0244522;HMDB0002823	Lipids and lipid-like molecules	Fatty Acyls	Fatty acids and conjugates	28845-86-5	357.279	7.61648	M+Na	C22H38O2	0	55.7	pos
neg_2152	Mucronine D	metab_9035	0.001066	0.001775	1.4338	1.4509	1.6136	0.6903	yes	C10009	-	-	-	-	-	-	HMDB0029335	Organic acids and derivatives	Carboxylic acids and derivatives	Amino acids, peptides, and analogues	38496-00-3	698.337	4.26557	M+K-2H	C37H51N5O6	0	65	neg
pos_2810	Neostigmine	metab_2000	0.0006482	0.001144	1.4331	1.4362	1.8196	0.8636	yes	C07258	-	-	-	-	-	-	HMDB0015472	Benzenoids	Benzene and substituted derivatives	Phenoxy compounds	59-99-4	268.118	4.40652	M+2Na-H	C12H19N2O2+	78.5	0	pos
neg_6283	Orotidine	metab_13603	8.13e-06	3.02e-05	1.4313	1.4284	0.6484	-0.625	yes	C01103	-	-	map00240;map01100;map01240	Pyrimidine metabolism;Metabolic pathways;Biosynthesis of cofactors	Metabolism;Metabolism;Metabolism	Nucleotide metabolism;Global and overview maps;Global and overview maps	HMDB0000788	Nucleosides, nucleotides, and analogues	Pyrimidine nucleosides	Not Available	314-50-1	325.007	3.98935	M+K-2H	C10H12N2O8	0	55.5	neg
pos_2938	Isoforskolin	metab_2139	1.9e-07	1.14e-06	1.4308	1.4261	1.5294	0.613	yes	-	-	-	-	-	-	-	HMDB0253641	Lipids and lipid-like molecules	Prenol lipids	Triterpenoids	-	393.223	4.78507	M+H-H2O	C22H34O7	0	52.8	pos
pos_7107	Val Val Asn	metab_6732	2.8e-05	7.22e-05	1.4306	1.4293	1.5125	0.5969	yes	-	-	-	-	-	-	-	-	-	-	-	-	331.197	2.68427	M+H	C14H26N4O5	44.6	0	pos
pos_688	Cincassiol B	metab_6478	3.69e-05	9.21e-05	1.43	1.4322	1.5565	0.6383	yes	-	-	-	-	-	-	-	HMDB0036855	Lipids and lipid-like molecules	Prenol lipids	Diterpenoids	73599-13-0	423.198	4.50322	M+H, M+Na	C20H32O8	0	36.5	pos
neg_346	Steviobioside	metab_10478	1.51e-11	1.73e-09	1.4263	1.4232	1.5084	0.593	yes	-	-	-	-	-	-	-	HMDB0036707	Lipids and lipid-like molecules	Prenol lipids	Terpene glycosides	41093-60-1	641.315	5.44175	M-H, M+FA-H	C32H50O13	0	68.8	neg
neg_871	Morinamide	metab_15218	1.8e-09	4.14e-08	1.426	1.4189	0.6287	-0.6696	yes	-	-	-	-	-	-	-	HMDB0254885	Organoheterocyclic compounds	Diazines	Pyrazines	-	243.087	3.47777	M-H2O-H, M+Na-2H	C10H14N4O2	0	32.2	neg
pos_1809	Pseudouridine	metab_897	0.0002795	0.0005433	1.4253	1.4357	1.5771	0.6572	yes	C02067	-	-	map00240;map01100	Pyrimidine metabolism;Metabolic pathways	Metabolism;Metabolism	Nucleotide metabolism;Global and overview maps	HMDB0000767	Nucleosides, nucleotides, and analogues	Nucleoside and nucleotide analogues	Not Available	1445-07-4	262.103	0.945833	M+NH4	C9H12N2O6	0	55.3	pos
neg_5392	N-Phenethylacetamide	metab_12618	1.09e-05	3.83e-05	1.4252	1.4178	0.6329	-0.66	yes	C06746	-	-	-	-	-	-	HMDB0255222	Organic acids and derivatives	Carboxylic acids and derivatives	Carboxylic acid derivatives	-	208.097	5.24413	M+FA-H	C10H13NO	0	33.6	neg
pos_6226	Apramycin	metab_5758	4.69e-05	0.0001126	1.4249	1.4071	1.563	0.6444	yes	C01555	-	-	map00524	Neomycin, kanamycin and gentamicin biosynthesis	Metabolism	Biosynthesis of other secondary metabolites	HMDB0248529	Organic oxygen compounds	Organooxygen compounds	Carbohydrates and carbohydrate conjugates	37321-09-8	504.266	3.8506	M+H-2H2O	C21H41N5O11	0	60.4	pos
neg_358	(x)-2-Heptanol glucoside	metab_10611	1.79e-08	2.49e-07	1.4243	1.4177	0.6384	-0.6475	yes	-	-	-	-	-	-	-	HMDB0035028	Lipids and lipid-like molecules	Fatty Acyls	Fatty acyl glycosides	-	299.15	5.57748	M-H2O-H, M+Na-2H	C13H26O6	0	31.7	neg
neg_6855	4'-Hydroxycilostazol, trans-	metab_14236	3.48e-06	1.54e-05	1.4241	1.4257	1.5793	0.6593	yes	-	-	-	-	-	-	-	HMDB0247541	Organoheterocyclic compounds	Quinolines and derivatives	Quinolones and derivatives	-	406.183	3.3988	M+Na-2H	C20H27N5O3	0	49.2	neg
pos_6779	Quinoline-4,8-diol	metab_6367	4.76e-07	2.41e-06	1.4239	1.4155	0.6155	-0.7001	yes	C05637	-	-	map00380	Tryptophan metabolism	Metabolism	Amino acid metabolism	HMDB0060289	Organoheterocyclic compounds	Quinolines and derivatives	Quinolones and derivatives	-	162.055	3.04903	M+H	C9H7NO2	0	62.4	pos
pos_1152	LysoPC(20:5(5Z,8Z,11Z,14Z,17Z)/0:0)	metab_171	3.44e-06	1.22e-05	1.4235	1.4344	1.3669	0.451	yes	C04230	Lipids	Phospholipids	map00564;map05231	Glycerophospholipid metabolism;Choline metabolism in cancer	Metabolism;Human Diseases	Lipid metabolism;Cancer: overview	HMDB0010397	Lipids and lipid-like molecules	Glycerophospholipids	Glycerophosphocholines	-	542.324	6.52018	M+H, M+Na	C28H48NO7P	0	86	pos
neg_3144	BUTHIDAZOLE	metab_10130	9.43e-11	5.27e-09	1.4231	1.421	1.5119	0.5964	yes	C19112	-	-	-	-	-	-	HMDB0249461	Organoheterocyclic compounds	Azoles	Thiadiazoles	55511-98-3	293.049	5.9627	M+K-2H	C10H16N4O2S	0	58.9	neg
pos_6908	Validamycin A	metab_6510	0.002773	0.004162	1.4227	1.4332	1.4497	0.5357	yes	C12112	-	-	map01100;map01110;map00525	Metabolic pathways;Biosynthesis of secondary metabolites;Acarbose and validamycin biosynthesis	Metabolism;Metabolism;Metabolism	Global and overview maps;Global and overview maps;Biosynthesis of other secondary metabolites	HMDB0036592	Organic oxygen compounds	Organooxygen compounds	Carbohydrates and carbohydrate conjugates	37248-47-8	515.246	2.87382	M+NH4	C20H35NO13	0	67.9	pos
pos_274	MG(22:5(7Z,10Z,13Z,16Z,19Z)/0:0/0:0)	metab_1921	3.46e-06	1.23e-05	1.4227	1.4184	0.7156	-0.4828	yes	-	-	-	-	-	-	-	HMDB0011586	Lipids and lipid-like molecules	Glycerolipids	Monoradylglycerols	-	405.3	6.5361	M+NH4, M+Na, M+H	C25H40O4	0	47.2	pos
pos_4606	Kaur-16-en-18-oic Acid	metab_3973	4.04e-08	3.73e-07	1.422	1.4118	0.6771	-0.5626	yes	C11874	-	-	map01100;map00904;map01110	Metabolic pathways;Diterpenoid biosynthesis;Biosynthesis of secondary metabolites	Metabolism;Metabolism;Metabolism	Global and overview maps;Metabolism of terpenoids and polyketides;Global and overview maps	LMPR01040120;HMDB0247185;HMDB0302664;MJDBOTE0001298	Lipids and lipid-like molecules	Prenol lipids	Diterpenoids	6730-83-2	303.232	6.48835	M+H	C20H30O2	32.5	0	pos
neg_6246	5alpha-Hydroxytriptolide	metab_13562	6.47e-09	1.15e-07	1.4219	1.4163	0.6369	-0.651	yes	-	-	-	-	-	-	-	HMDB0247016	Organoheterocyclic compounds	Oxepanes	Not Available	-	413.102	4.02917	M+K-2H	C20H24O7	0	52.6	neg
pos_1895	3''-deamino-3''-oxonicotianamine	metab_990	0.0001776	0.000363	1.4214	1.424	1.4863	0.5717	yes	C15486	-	-	-	-	-	-	HMDB0304096	Organic acids and derivatives	Carboxylic acids and derivatives	Amino acids, peptides, and analogues	-	319.14	1.62155	M+NH4	C12H17N2O7-	0	54.5	pos
pos_389	His His	metab_3181	3.87e-08	3.61e-07	1.4207	1.4153	1.5436	0.6263	yes	-	-	-	-	-	-	-	-	-	-	-	-	293.135	2.13595	M+H-2H2O, M+H	C12H16N6O3	90	0	pos
neg_1052	L-Phosphoarginine	metab_7816	0.0003946	0.0007301	1.4192	1.4054	1.4788	0.5644	yes	C05945	-	-	map00330	Arginine and proline metabolism	Metabolism	Amino acid metabolism	HMDB0029438	Organic acids and derivatives	Carboxylic acids and derivatives	Amino acids, peptides, and analogues	1189-11-3	507.15	0.9539	2M-H	C6H15N4O5P	0	31.9	neg
neg_4331	N-Linoleoyl Methionine	metab_11443	2.18e-07	1.82e-06	1.4168	1.4198	1.4658	0.5517	yes	-	-	-	-	-	-	-	HMDB0241981	Organic acids and derivatives	Carboxylic acids and derivatives	Amino acids, peptides, and analogues	-	410.274	6.58587	M-H	C23H41NO3S	0	31.2	neg
neg_423	Auxin a	metab_11331	1.24e-09	3.11e-08	1.4163	1.4085	0.6816	-0.553	yes	-	-	-	-	-	-	-	HMDB0038483	Lipids and lipid-like molecules	Prenol lipids	Monoterpenoids	-	349.202	6.15708	M-H, M+Na-2H	C18H32O5	0	42.8	neg
pos_3070	3-(5'-methylthio)pentylmalate	metab_2287	2.34e-07	1.35e-06	1.4158	1.4088	0.6533	-0.6141	yes	C17223	-	-	map01210;map00966	2-Oxocarboxylic acid metabolism;Glucosinolate biosynthesis	Metabolism;Metabolism	Global and overview maps;Biosynthesis of other secondary metabolites	HMDB0304110	Organic acids and derivatives	Hydroxy acids and derivatives	Medium-chain hydroxy acids and derivatives	-	266.107	5.18575	M+NH4	C10H16O5S-2	0	50.3	pos
pos_5238	Phoenicoxanthin	metab_4667	3.14e-05	7.97e-05	1.4156	1.418	0.6355	-0.654	yes	C15967	-	-	map00906;map01110	Carotenoid biosynthesis;Biosynthesis of secondary metabolites	Metabolism;Metabolism	Metabolism of terpenoids and polyketides;Global and overview maps	HMDB0248021	Lipids and lipid-like molecules	Prenol lipids	Tetraterpenoids	-	625.358	5.796	M+2Na-H	C40H52O3	0	48.5	pos
neg_2082	H-D-Tyr-val-gly-OH	metab_8957	0.02696	0.03306	1.4145	1.4526	2.0958	1.0675	yes	-	-	-	-	-	-	-	HMDB0253011	Organic acids and derivatives	Carboxylic acids and derivatives	Amino acids, peptides, and analogues	-	318.149	4.17083	M-H2O-H	C16H23N3O5	0	32.5	neg
pos_6116	Indole-3-acetyl-isoleucine	metab_5636	1.2e-06	5.11e-06	1.4126	1.4065	0.6473	-0.6274	yes	-	-	-	-	-	-	-	HMDB0304382	Organic acids and derivatives	Carboxylic acids and derivatives	Amino acids, peptides, and analogues	-	351.155	4.01997	M+ACN+Na	C16H19N2O3-	0	53.3	pos
neg_504	1-Heneicosanoyl-glycero-3-phosphoserine	metab_12228	3.25e-06	1.46e-05	1.4124	1.4135	1.4615	0.5474	yes	-	-	-	-	-	-	-	LMGP03050026;HMDB0243883	Lipids and lipid-like molecules	Glycerophospholipids	Glycerophosphoserines	-	566.347	7.53885	M-H, M+Na-2H	C27H54NO9P	0	41.7	neg
pos_1547	Glu Glu Lys	metab_608	4.64e-05	0.0001117	1.4124	1.4101	1.4381	0.5242	yes	-	-	-	-	-	-	-	-	-	-	-	-	405.198	2.78778	M+H, M+2Na-H	C16H28N4O8	53.2	0	pos
neg_2095	Biocytin	metab_8971	1.51e-08	2.2e-07	1.4113	1.41	1.5318	0.6152	yes	C05552	-	-	map01100;map00780;map04977	Metabolic pathways;Biotin metabolism;Vitamin digestion and absorption	Metabolism;Metabolism;Organismal Systems	Global and overview maps;Metabolism of cofactors and vitamins;Digestive system	HMDB0003134;PW_C001785	Organic acids and derivatives	Carboxylic acids and derivatives	Amino acids, peptides, and analogues	576-19-2	417.178	4.18648	M+FA-H	C16H28N4O4S	0	44.2	neg
pos_6454	Ile Phe Gln	metab_6011	0.0009883	0.001663	1.4111	1.3907	1.6092	0.6863	yes	-	-	-	-	-	-	-	-	-	-	-	-	407.228	3.5041	M+H	C20H30N4O5	94.2	0	pos
pos_3602	Homodolicholide	metab_2868	1.94e-06	7.59e-06	1.4108	1.4055	0.7064	-0.5015	yes	-	-	-	-	-	-	-	HMDB0033907	Organoheterocyclic compounds	Benzopyrans	1-benzopyrans	86630-40-2	515.334	6.63155	M+Na	C29H48O6	0	72.9	pos
pos_3868	Aminophenazone	metab_3157	2.4e-08	2.6e-07	1.4097	1.4069	1.4657	0.5516	yes	C07539	-	-	-	-	-	-	HMDB0015493	Organoheterocyclic compounds	Azoles	Pyrazoles	58-15-1	504.307	7.72757	2M+ACN+H	C13H17N3O	0	49.2	pos
pos_1684	Asp Pro Thr	metab_759	0.001086	0.001809	1.4096	1.4128	1.4659	0.5518	yes	-	-	-	-	-	-	-	-	-	-	-	-	332.145	1.5657	M+H-2H2O, M+H	C13H21N3O7	58.1	0	pos
neg_7149	Indole-3-glycol aldehyde	metab_14562	4.06e-09	8e-08	1.4095	1.4045	1.5903	0.6693	yes	C03230	-	-	map01100;map00380	Metabolic pathways;Tryptophan metabolism	Metabolism;Metabolism	Global and overview maps;Amino acid metabolism	HMDB0304393	Organoheterocyclic compounds	Indoles and derivatives	Indoles	-	349.118	2.83418	2M-H	C10H9NO2	0	35.3	neg
pos_5306	Isosakuranetin	metab_4742	9.97e-08	7.03e-07	1.4092	1.4015	0.6813	-0.5537	yes	C05334	-	-	map00941;map01110	Flavonoid biosynthesis;Biosynthesis of secondary metabolites	Metabolism;Metabolism	Biosynthesis of other secondary metabolites;Global and overview maps	HMDB0253690;LMPK12140355;MJDBOTE0001315	Phenylpropanoids and polyketides	Flavonoids	O-methylated flavonoids	480-43-3	304.118	5.67548	M+NH4	C16H14O5	0	53	pos
pos_6813	Shikimic acid	metab_6406	1.62e-09	3.72e-08	1.4083	1.4013	0.6446	-0.6335	yes	C00493	-	-	map01100;map01110;map01240;map01063;map01230;map00400;map01070;map01061;map01060	Metabolic pathways;Biosynthesis of secondary metabolites;Biosynthesis of cofactors;Biosynthesis of alkaloids derived from shikimate pathway;Biosynthesis of amino acids;Phenylalanine, tyrosine and tryptophan biosynthesis;Biosynthesis of plant hormones;Biosynthesis of phenylpropanoids;Biosynthesis of plant secondary metabolites	Metabolism;Metabolism;Metabolism;Metabolism;Metabolism;Metabolism;Metabolism;Metabolism;Metabolism	Global and overview maps;Global and overview maps;Global and overview maps;Chemical structure transformation maps;Global and overview maps;Amino acid metabolism;Chemical structure transformation maps;Chemical structure transformation maps;Chemical structure transformation maps	HMDB0003070	Organic oxygen compounds	Organooxygen compounds	Alcohols and polyols	138-59-0	216.087	3.00133	M+ACN+H	C7H10O5	0	43.8	pos
pos_3243	5-Oxo-prolyl-glycyl-arginine-4-nitroanilide	metab_2478	3.06e-06	1.11e-05	1.408	1.4114	0.6337	-0.6581	yes	-	-	-	-	-	-	-	HMDB0250211	Organic acids and derivatives	Carboxylic acids and derivatives	Amino acids, peptides, and analogues	-	445.196	5.73148	M+H-H2O	C19H26N8O6	0	58.4	pos
pos_6065	Zaleplon	metab_5579	6.64e-07	3.16e-06	1.4078	1.4027	0.6802	-0.556	yes	C07484	-	-	-	-	-	-	HMDB0015097	Organoheterocyclic compounds	Diazines	Pyrimidines and pyrimidine derivatives	151319-34-5	323.16	4.10862	M+NH4	C17H15N5O	43.5	0	pos
neg_6094	Cinncassiol D2 glucoside	metab_13396	6.33e-06	2.47e-05	1.4068	1.4003	1.5161	0.6003	yes	-	-	-	-	-	-	-	HMDB0034679	Lipids and lipid-like molecules	Prenol lipids	Terpene glycosides	-	529.263	4.19432	M-H	C26H42O11	0	61	neg
pos_3348	Cer(d16:1/22:6(5Z,8E,10Z,13Z,15E,19Z)-2OH(7S, 17S))	metab_2591	1.42e-06	5.85e-06	1.4059	1.4056	0.6641	-0.5905	yes	-	-	-	-	-	-	-	HMDB0289871	Not Available	Not Available	Not Available	-	578.453	5.9558	M+H-2H2O	C38H63NO5	0	88.7	pos
pos_2320	1-Deoxynojirimycin	metab_1460	1.47e-05	4.17e-05	1.4048	1.4118	1.5376	0.6207	yes	C16843	-	-	-	-	-	-	HMDB0035359	Organoheterocyclic compounds	Piperidines	Not Available	19130-96-2	390.188	3.19342	2M+ACN+Na	C6H13NO4	0	57.1	pos
pos_3366	PA(8:0/i-16:0)	metab_2611	0.0009929	0.00167	1.4042	1.4003	1.4605	0.5465	yes	C00416	Lipids	Phospholipids	map01100;map00564;map01110;map00561;map05212;map05200;map04975;map04024;map05231;map04072;map04912;map04070;map04666	Metabolic pathways;Glycerophospholipid metabolism;Biosynthesis of secondary metabolites;Glycerolipid metabolism;Pancreatic cancer;Pathways in cancer;Fat digestion and absorption;cAMP signaling pathway;Choline metabolism in cancer;Phospholipase D signaling pathway;GnRH signaling pathway;Phosphatidylinositol signaling system;Fc gamma R-mediated phagocytosis	Metabolism;Metabolism;Metabolism;Metabolism;Human Diseases;Human Diseases;Organismal Systems;Environmental Information Processing;Human Diseases;Environmental Information Processing;Organismal Systems;Environmental Information Processing;Organismal Systems	Global and overview maps;Lipid metabolism;Global and overview maps;Lipid metabolism;Cancer: specific types;Cancer: overview;Digestive system;Signal transduction;Cancer: overview;Signal transduction;Endocrine system;Signal transduction;Immune system	HMDB0115689;PW_C064074	Lipids and lipid-like molecules	Glycerophospholipids	Glycerophosphates	-	559.341	6.0035	M+Na	C27H53O8P	0	33.4	pos
neg_6918	Tubocurarine	metab_14306	4.1e-10	1.47e-08	1.4039	1.4002	1.4837	0.5692	yes	C07547	-	-	map01063;map07221	Biosynthesis of alkaloids derived from shikimate pathway;Nicotinic cholinergic receptor antagonists	Metabolism;Drug Development	Chemical structure transformation maps;Target-based classification: Ion channels	HMDB0015330	Organic oxygen compounds	Organooxygen compounds	Ethers	57-95-4;6989-98-6	630.274	3.33547	M+Na-2H	C37H41N2O6+	0	46.9	neg
neg_6087	Deoxynivalenol 3-glucoside	metab_13388	2.46e-06	1.17e-05	1.4039	1.3934	1.497	0.5821	yes	-	-	-	-	-	-	-	HMDB0039852	Lipids and lipid-like molecules	Prenol lipids	Sesquiterpenoids	131180-21-7	503.179	4.20215	M+FA-H	C21H30O11	0	36	neg
neg_2652	Bisphenol B	metab_9587	2.37e-10	1.04e-08	1.4035	1.3993	1.6507	0.7231	yes	C14225	-	-	-	-	-	-	HMDB0245327	Benzenoids	Benzene and substituted derivatives	Diphenylmethanes	77-40-7	543.279	5.176	2M+Hac-H	C16H18O2	0	61.1	neg
pos_2452	Dihydrocaffeic acid 3-sulfate	metab_1605	7.05e-07	3.31e-06	1.4034	1.4019	1.5704	0.6511	yes	-	-	-	-	-	-	-	HMDB0041721	Organic acids and derivatives	Organic sulfuric acids and derivatives	Arylsulfates	-	304.048	3.51208	M+ACN+H	C9H10O7S	0	59.5	pos
neg_2100	Tetraphyllin B	metab_8978	1.37e-09	3.38e-08	1.4031	1.4017	1.5613	0.6427	yes	-	-	-	-	-	-	-	HMDB0029914	Organic oxygen compounds	Organooxygen compounds	Carbohydrates and carbohydrate conjugates	34323-07-4	308.078	4.19432	M+Na-2H	C12H17NO7	0	50.4	neg
neg_291	L-Prolyl-4-hydroxy-L-prolin	metab_9872	0.001173	0.001926	1.4026	1.385	1.6372	0.7112	yes	-	-	-	-	-	-	-	HMDB0256781	Organic acids and derivatives	Carboxylic acids and derivatives	Amino acids, peptides, and analogues	-	515.236	4.76547	2M-H, 2M+Hac-H	C10H16N2O4	0	36.4	neg
neg_259	Mabioside E	metab_9517	6.57e-05	0.0001638	1.4023	1.4123	1.5124	0.5968	yes	-	-	-	-	-	-	-	HMDB0040654	Lipids and lipid-like molecules	Prenol lipids	Triterpenoids	156980-56-2	518.229	4.3752	M-2H, M-H	C48H78O22S	0	81.2	neg
neg_6825	Difenoxin	metab_14203	0.0001814	0.0003796	1.4019	1.4019	1.5047	0.5895	yes	C07871	-	-	-	-	-	-	HMDB0251256	Benzenoids	Benzene and substituted derivatives	Diphenylacetonitriles	28782-42-5	445.194	3.42228	M+Na-2H	C28H28N2O2	0	49.1	neg
neg_2853	Cibenzoline	metab_9809	5.65e-11	3.9e-09	1.4015	1.3993	1.5964	0.6749	yes	-	-	-	-	-	-	-	HMDB0250229	Benzenoids	Benzene and substituted derivatives	Diphenylmethanes	-	583.31	5.51037	2M+Hac-H	C18H18N2	0	78.7	neg
pos_154	2-ethyl-N-[4-(4-fluorophenyl)-1,3-thiazol-2-yl]hexanamide	metab_600	5.13e-08	4.39e-07	1.4002	1.3923	0.7054	-0.5035	yes	-	-	-	-	-	-	-	-	-	-	-	-	303.134	5.45047	M+H-H2O, M+H, M+H-2H2O	C17H21FN2OS	47.9	0	pos
neg_4920	Pravastatin	metab_12095	0.0001905	0.0003965	1.3996	1.3871	1.4541	0.5401	yes	C01844	-	-	map04976	Bile secretion	Organismal Systems	Digestive system	HMDB0005022;LMFA05000695;HMDB0256737;PW_C002369;MJDBOTE0001592	Organic acids and derivatives	Hydroxy acids and derivatives	Medium-chain hydroxy acids and derivatives	81093-37-0	405.224	5.89217	M-H2O-H	C23H36O7	0	42.3	neg
neg_3189	(3S,7E,9S)-9-Hydroxy-4,7-megastigmadien-3-one 9-glucoside	metab_10179	9.08e-06	3.3e-05	1.398	1.3947	1.504	0.5888	yes	-	-	-	-	-	-	-	HMDB0036822	Lipids and lipid-like molecules	Fatty Acyls	Fatty acyl glycosides	-	415.197	6.0331	M+FA-H	C19H30O7	0	31.9	neg
neg_6573	(3S,4R,5R)-1,3,4,5,6-Pentahydroxy-1-morpholin-4-ylhexan-2-one	metab_13924	8.38e-10	2.33e-08	1.3977	1.3933	0.6298	-0.667	yes	-	-	-	-	-	-	-	HMDB0243864	Organoheterocyclic compounds	Oxazinanes	Morpholines	-	246.099	3.67417	M-H2O-H	C10H19NO7	0	67.4	neg
pos_2031	Val Glu Glu	metab_1143	0.0003465	0.0006565	1.3969	1.4061	1.489	0.5743	yes	-	-	-	-	-	-	-	-	-	-	-	-	376.171	2.62005	M+H	C15H25N3O8	83.7	0	pos
neg_6625	Alanylisoleucine	metab_13982	4.98e-07	3.44e-06	1.3964	1.3952	1.6311	0.7058	yes	-	-	-	-	-	-	-	HMDB0028690	Organic acids and derivatives	Carboxylic acids and derivatives	Amino acids, peptides, and analogues	29727-65-9	183.113	3.62713	M-H2O-H	C9H18N2O3	0	61.7	neg
pos_6839	Trp Gln	metab_6434	8.08e-06	2.51e-05	1.3956	1.384	1.4511	0.5371	yes	-	-	-	-	-	-	-	-	-	-	-	-	333.156	2.96135	M+H	C16H20N4O4	76.5	0	pos
neg_282	AB-Chminaca	metab_9772	0.0001121	0.0002547	1.3951	1.3866	1.4725	0.5583	yes	-	-	-	-	-	-	-	HMDB0247738	Organic acids and derivatives	Carboxylic acids and derivatives	Amino acids, peptides, and analogues	-	377.193	4.63315	M+Na-2H, M+K-2H	C20H28N4O2	0	40.6	neg
neg_5291	Triglyceride palmitate	metab_12507	0.0003085	0.0005904	1.3948	1.4036	1.5451	0.6277	yes	-	-	-	-	-	-	-	HMDB0259215	Organic acids and derivatives	Carboxylic acids and derivatives	Tetracarboxylic acids and derivatives	-	499.255	5.3722	M-H2O-H	C25H42O11	0	74.1	neg
neg_5696	11-Dehydro-thromboxane B2	metab_12954	6.37e-08	6.71e-07	1.3931	1.3902	0.6536	-0.6134	yes	C05964	Lipids	Eicosanoids	map00590;map01100;map04726	Arachidonic acid metabolism;Metabolic pathways;Serotonergic synapse	Metabolism;Metabolism;Organismal Systems	Lipid metabolism;Global and overview maps;Nervous system	PW_C002104;LMFA03030004;HMDB0004242;LMFA03030014;HMDB0244347	Lipids and lipid-like molecules	Fatty Acyls	Eicosanoids	67910-12-7	367.212	4.76547	M-H	C20H32O6	0	42.2	neg
pos_4450	3-(5-Methoxy-4-oxocyclohex-2-en-1-yl)prop-2-enoic acid	metab_3801	1.3e-07	8.55e-07	1.3925	1.3853	0.672	-0.5734	yes	-	-	-	-	-	-	-	HMDB0255409	Organic oxygen compounds	Organooxygen compounds	Carbonyl compounds	-	179.07	6.72673	M+H-H2O	C10H12O4	0	33.9	pos
pos_2878	Prolylhydroxyproline	metab_2072	1.03e-07	7.2e-07	1.3923	1.3896	1.5944	0.673	yes	-	-	-	-	-	-	-	HMDB0256781;HMDB0006695	Organic acids and derivatives	Carboxylic acids and derivatives	Amino acids, peptides, and analogues	18684-24-7	457.229	4.58372	2M+H	C10H16N2O4	0	48.3	pos
pos_6276	Leu Phe Asp	metab_5813	0.0004606	0.0008458	1.3915	1.3986	1.5822	0.6619	yes	-	-	-	-	-	-	-	-	-	-	-	-	394.196	3.77008	M+H	C19H27N3O6	53.5	0	pos
pos_3672	LysoPC(22:4(7Z,10Z,13Z,16Z)/0:0)	metab_2944	9.58e-10	2.52e-08	1.3902	1.3876	1.3994	0.4848	yes	C04230	Lipids	Phospholipids	map00564;map05231	Glycerophospholipid metabolism;Choline metabolism in cancer	Metabolism;Human Diseases	Lipid metabolism;Cancer: overview	HMDB0010401	Lipids and lipid-like molecules	Glycerophospholipids	Glycerophosphocholines	-	572.371	6.84615	M+H	C30H54NO7P	0	78.8	pos
pos_5532	Gly Trp Ile	metab_4990	0.02265	0.02848	1.3882	1.4017	1.9557	0.9677	yes	-	-	-	-	-	-	-	-	-	-	-	-	375.202	5.18575	M+H	C19H26N4O4	45.5	0	pos
pos_3869	LysoPC(20:1(11Z)/0:0)	metab_3158	1.24e-05	3.59e-05	1.388	1.3859	1.3598	0.4434	yes	C04230	Lipids	Phospholipids	map00564;map05231	Glycerophospholipid metabolism;Choline metabolism in cancer	Metabolism;Human Diseases	Lipid metabolism;Cancer: overview	HMDB0010391	Lipids and lipid-like molecules	Glycerophospholipids	Glycerophosphocholines	-	550.387	7.72757	M+H	C28H56NO7P	0	91.7	pos
pos_6090	16-Oxoestrone	metab_5607	0.009372	0.01265	1.3869	1.4027	2.024	1.0172	yes	C14441	-	-	-	-	-	-	HMDB0000372;LMST02010048	Lipids and lipid-like molecules	Steroids and steroid derivatives	Estrane steroids	1228-73-5	307.129	4.06797	M+Na	C18H20O3	0	42.1	pos
neg_5808	(E)-2-Methyl-2-buten-1-ol O-beta-D-Glucopyranoside	metab_13079	0.0001293	0.0002867	1.3863	1.3688	1.6351	0.7094	yes	-	-	-	-	-	-	-	HMDB0033064	Lipids and lipid-like molecules	Fatty Acyls	Fatty acyl glycosides	-	293.124	4.59687	M+FA-H	C11H20O6	0	45.3	neg
pos_5441	1-Tert-butyl 4-ethyl 5-oxoazepane-1,4-dicarboxylate	metab_4892	4.78e-07	2.41e-06	1.3863	1.3878	1.4957	0.5808	yes	-	-	-	-	-	-	-	HMDB0244604	Organoheterocyclic compounds	Azepanes	Not Available	-	303.191	5.3544	M+NH4	C14H23NO5	0	43.3	pos
neg_2971	(3S,5S)-3,5-Diaminohexanoate	metab_9939	6.94e-09	1.22e-07	1.3861	1.3779	0.5847	-0.7741	yes	C01186	-	-	map01100;map00310	Metabolic pathways;Lysine degradation	Metabolism;Metabolism	Global and overview maps;Amino acid metabolism	HMDB0012115	Organic acids and derivatives	Carboxylic acids and derivatives	Amino acids, peptides, and analogues	17027-83-7	337.212	5.75437	2M+FA-H	C6H14N2O2	0	53.5	neg
pos_3864	LysoPC(16:0/0:0)	metab_3153	1.26e-06	5.3e-06	1.3852	1.3836	1.312	0.3917	yes	C04230	Lipids	Phospholipids	map00564;map05231	Glycerophospholipid metabolism;Choline metabolism in cancer	Metabolism;Human Diseases	Lipid metabolism;Cancer: overview	HMDB0010382	Lipids and lipid-like molecules	Glycerophospholipids	Glycerophosphocholines	17364-16-8	518.322	7.71195	M+Na	C24H50NO7P	0	85.4	pos
pos_5403	17alpha-Estradiol	metab_4850	3.19e-07	1.73e-06	1.3848	1.3775	0.6541	-0.6123	yes	C02537	Steroids	18-Carbon atoms	map00140	Steroid hormone biosynthesis	Metabolism	Lipid metabolism	HMDB0000429	Lipids and lipid-like molecules	Steroids and steroid derivatives	Estrane steroids	57-91-0	317.149	5.44247	M+2Na-H	C18H24O2	0	56.2	pos
neg_6018	Rimiterol	metab_13312	0.001046	0.001744	1.3848	1.3941	1.4748	0.5605	yes	-	-	-	-	-	-	-	HMDB0257235	Benzenoids	Phenols	Benzenediols	-	445.23	4.2969	2M-H	C12H17NO3	0	42.9	neg
neg_1042	Glutaminylasparagine	metab_7805	0.0003216	0.0006123	1.3845	1.3889	1.5124	0.5968	yes	-	-	-	-	-	-	-	HMDB0028792	Organic acids and derivatives	Carboxylic acids and derivatives	Amino acids, peptides, and analogues	14608-79-8	259.105	0.946067	M-H	C9H16N4O5	0	37.9	neg
neg_2598	Nivacortol	metab_9526	0.0004745	0.000857	1.3845	1.3889	1.5945	0.6731	yes	-	-	-	-	-	-	-	HMDB0255670	Lipids and lipid-like molecules	Steroids and steroid derivatives	Estrane steroids	-	429.235	5.09412	M-H	C28H31FN2O	0	49.3	neg
neg_470	3-Dehydroteasterone	metab_11851	8.07e-07	4.97e-06	1.3841	1.3783	0.7476	-0.4197	yes	C15792	-	-	map01100;map00905;map01110	Metabolic pathways;Brassinosteroid biosynthesis;Biosynthesis of secondary metabolites	Metabolism;Metabolism;Metabolism	Global and overview maps;Metabolism of terpenoids and polyketides;Global and overview maps	HMDB0041527;LMST01030131	Lipids and lipid-like molecules	Steroids and steroid derivatives	Bile acids, alcohols and derivatives	124853-28-7	445.332	6.67192	M-H, M+Na-2H	C28H46O4	0	72.5	neg
neg_1498	Asn Ile Ala Glu	metab_8309	8.05e-05	0.0001931	1.3827	1.377	1.4479	0.534	yes	-	-	-	-	-	-	-	-	-	-	-	-	444.21	3.42228	M-H	C18H31N5O8	38.7	0	neg
pos_6007	Leu-leu-tyr	metab_5515	1.25e-10	5.9e-09	1.3821	1.3785	1.5188	0.6029	yes	C11331	-	-	-	-	-	-	HMDB0304804	Organic acids and derivatives	Carboxylic acids and derivatives	Amino acids, peptides, and analogues	20368-24-5	408.249	4.22932	M+H	C21H33N3O5	81.2	0	pos
neg_4501	13'-Carboxy-gamma-tocopherol	metab_11632	1.35e-07	1.28e-06	1.382	1.38	0.704	-0.5063	yes	-	-	-	-	-	-	-	HMDB0012557	Lipids and lipid-like molecules	Prenol lipids	Quinone and hydroquinone lipids	-	491.338	6.35927	M+FA-H	C28H46O4	0	37.2	neg
pos_5636	Ile Val Leu Glu	metab_5104	2.58e-06	9.64e-06	1.3817	1.3907	1.5485	0.6309	yes	-	-	-	-	-	-	-	-	-	-	-	-	473.297	4.97775	M+H	C22H40N4O7	52.2	0	pos
neg_5977	Decarbamoylsaxitoxin	metab_13265	2.21e-08	2.92e-07	1.3817	1.3824	1.4826	0.5682	yes	C20021	-	-	-	-	-	-	HMDB0038319	Phenylpropanoids and polyketides	Saxitoxins, gonyautoxins, and derivatives	Not Available	58911-04-9	571.274	4.35957	2M+Hac-H	C9H16N6O3	0	62	neg
pos_6409	Deoxypyridinoline	metab_5961	0.00014	0.0002957	1.3815	1.3766	1.4229	0.5088	yes	-	-	-	-	-	-	-	HMDB0000569	Organic acids and derivatives	Carboxylic acids and derivatives	Amino acids, peptides, and analogues	83462-55-9	430.23	3.5686	M+NH4	C18H28N4O7	0	67	pos
pos_3308	Propacetamol	metab_2548	1.46e-05	4.15e-05	1.3799	1.374	1.5284	0.612	yes	-	-	-	-	-	-	-	HMDB0256808	Organic acids and derivatives	Carboxylic acids and derivatives	Amino acids, peptides, and analogues	-	546.329	5.8998	2M+NH4	C14H20N2O3	0	36.8	pos
neg_276	4-(4-Fluorophenyl)-3-(4-hydroxy-3-methoxyphenoxymethyl)piperidine	metab_9705	0.01955	0.02453	1.3794	1.4127	1.7087	0.7729	yes	-	-	-	-	-	-	-	HMDB0249389	Organoheterocyclic compounds	Piperidines	Phenylpiperidines	-	661.306	4.5596	M+FA-H, 2M-H	C19H22FNO3	0	54.9	neg
pos_2276	Ile Leu Gln	metab_1410	4.53e-05	0.0001095	1.3781	1.3815	1.5041	0.5889	yes	-	-	-	-	-	-	-	-	-	-	-	-	373.244	3.1052	M+H	C17H32N4O5	51.2	0	pos
pos_2061	4-Fluoro-L-phenylalanine	metab_1175	1.57e-05	4.41e-05	1.3778	1.3799	1.4346	0.5206	yes	C11217	-	-	-	-	-	-	HMDB0246423	Organic acids and derivatives	Carboxylic acids and derivatives	Amino acids, peptides, and analogues	-	430.157	2.69222	2M+ACN+Na	C9H10FNO2	0	33.1	pos
neg_5955	Ala Gly Leu Val Ser	metab_13241	4.84e-10	1.59e-08	1.3777	1.3737	1.4655	0.5514	yes	-	-	-	-	-	-	-	-	-	-	-	-	444.246	4.38305	M-H	C19H35N5O7	55.9	0	neg
neg_6729	Gibberellin A32	metab_14097	2.81e-07	2.19e-06	1.3776	1.3719	0.667	-0.5843	yes	-	-	-	-	-	-	-	HMDB0035037	Lipids and lipid-like molecules	Prenol lipids	Diterpenoids	32165-30-3	415.082	3.51745	M+K-2H	C19H22O8	0	52.7	neg
pos_3075	Kanokoside C	metab_2292	0.0001554	0.0003228	1.3776	1.3796	0.6627	-0.5935	yes	C17430	-	-	-	-	-	-	HMDB0035305	Organic oxygen compounds	Organooxygen compounds	Carbonyl compounds	64703-87-3	671.274	5.19377	M+CH3OH+H	C27H42O17	0	47	pos
neg_6211	Cynaropicrin	metab_15369	6.65e-07	4.33e-06	1.3775	1.3681	0.692	-0.5312	yes	C09385	-	-	-	-	-	-	HMDB0036423	Lipids and lipid-like molecules	Prenol lipids	Terpene lactones	35730-78-0	383.092	4.06838	M+K-2H	C19H22O6	0	57.5	neg
neg_3576	11,12-Epoxyeicosatrienoic acid	metab_10607	3.45e-06	1.53e-05	1.3774	1.368	0.7341	-0.446	yes	C14770	-	-	map00590;map01100;map04913;map04270;map04726	Arachidonic acid metabolism;Metabolic pathways;Ovarian steroidogenesis;Vascular smooth muscle contraction;Serotonergic synapse	Metabolism;Metabolism;Organismal Systems;Organismal Systems;Organismal Systems	Lipid metabolism;Global and overview maps;Endocrine system;Circulatory system;Nervous system	PW_C002170;HMDB0004673;HMDB0244445;LMFA03090011	Lipids and lipid-like molecules	Fatty Acyls	Eicosanoids	123931-40-8;81276-02-0	365.236	6.81252	M+FA-H	C20H32O3	0	59.6	neg
pos_102	7'-Carboxy-gamma-tocotrienol	metab_24	0.004806	0.006859	1.3769	1.3732	0.5884	-0.7652	yes	-	-	-	-	-	-	-	HMDB0012851	Organoheterocyclic compounds	Benzopyrans	1-benzopyrans	1221262-26-5	315.195	4.67972	M+H-H2O, M+H, M+H-2H2O	C20H28O4	0	35.5	pos
pos_5412	Corey PG-Lactone Diol	metab_4860	5.36e-05	0.0001266	1.3767	1.3626	0.6342	-0.6569	yes	-	-	-	-	-	-	-	-	-	-	-	-	269.174	5.41847	M+H	C15H24O4	45.7	0	pos
pos_5572	Thienamycin	metab_5034	0.000397	0.0007414	1.3761	1.3876	1.6441	0.7173	yes	C06664	Antibiotics	beta-Lactams	map01110;map00332	Biosynthesis of secondary metabolites;Carbapenem biosynthesis	Metabolism;Metabolism	Global and overview maps;Biosynthesis of other secondary metabolites	HMDB0258982	Organoheterocyclic compounds	Lactams	Beta lactams	59995-64-1	305.116	5.10575	M+CH3OH+H	C11H16N2O4S	0	43.1	pos
neg_2025	Ile Ser Thr Glu	metab_8895	8.16e-05	0.0001953	1.3752	1.3789	1.5095	0.594	yes	-	-	-	-	-	-	-	-	-	-	-	-	447.21	4.09187	M-H	C18H32N4O9	63.5	0	neg
neg_1572	Lobucavir	metab_8391	1.68e-07	1.51e-06	1.3751	1.369	0.6528	-0.6154	yes	-	-	-	-	-	-	-	HMDB0254142	Organoheterocyclic compounds	Imidazopyrimidines	Purines and purine derivatives	-	286.091	3.50913	M+Na-2H	C11H15N5O3	0	46.7	neg
neg_7279	Aspartyl-Tryptophan	metab_14704	4.47e-07	3.16e-06	1.3751	1.3767	1.4701	0.556	yes	-	-	-	-	-	-	-	HMDB0028764	Organic acids and derivatives	Carboxylic acids and derivatives	Amino acids, peptides, and analogues	-	356.066	1.47117	M+K-2H	C15H17N3O5	0	44.7	neg
pos_6070	Castanospermine	metab_5585	3.4e-06	1.21e-05	1.3751	1.3606	1.4217	0.5076	yes	C02256	-	-	-	-	-	-	HMDB0249700	Organoheterocyclic compounds	Indolizidines	Not Available	79831-76-8	379.207	4.1006	2M+H	C8H15NO4	0	40.2	pos
pos_3650	Dehydroepiandrosterone	metab_2920	2.45e-09	4.83e-08	1.3744	1.3681	0.6795	-0.5575	yes	C01227	Steroids;Hormones and transmitters	19-Carbon atoms;Steroid hormones	map01100;map05215;map00984;map01120;map05200;map04913;map00140	Metabolic pathways;Prostate cancer;Steroid degradation;Microbial metabolism in diverse environments;Pathways in cancer;Ovarian steroidogenesis;Steroid hormone biosynthesis	Metabolism;Human Diseases;Metabolism;Metabolism;Human Diseases;Organismal Systems;Metabolism	Global and overview maps;Cancer: specific types;Xenobiotics biodegradation and metabolism;Global and overview maps;Cancer: overview;Endocrine system;Lipid metabolism	LMST02020021;HMDB0000077;PW_C000054;HMDB0005962;MJDBOTE0001055	Lipids and lipid-like molecules	Steroids and steroid derivatives	Androstane steroids	53-43-0;2283-82-1	289.216	6.8064	M+H	C19H28O2	0	39.2	pos
neg_1629	8-Methoxykynurenate	metab_8454	7.84e-06	2.92e-05	1.3737	1.3673	0.649	-0.6238	yes	C05830	-	-	map00380	Tryptophan metabolism	Metabolism	Amino acid metabolism	HMDB0060426	Organoheterocyclic compounds	Quinolines and derivatives	Quinoline carboxylic acids	2929-14-8	264.051	3.58013	M+FA-H	C11H9NO4	0	70.2	neg
pos_2527	Caffeine	metab_1688	0.001369	0.002221	1.3733	1.3615	0.4467	-1.1628	yes	C07481	-	-	map01100;map01110;map01120;map00232;map01065;map01060	Metabolic pathways;Biosynthesis of secondary metabolites;Microbial metabolism in diverse environments;Caffeine metabolism;Biosynthesis of alkaloids derived from histidine and purine;Biosynthesis of plant secondary metabolites	Metabolism;Metabolism;Metabolism;Metabolism;Metabolism;Metabolism	Global and overview maps;Global and overview maps;Global and overview maps;Biosynthesis of other secondary metabolites;Chemical structure transformation maps;Chemical structure transformation maps	HMDB0001847;PW_C001222	Organoheterocyclic compounds	Imidazopyrimidines	Purines and purine derivatives	1958-08-02	195.088	3.67295	M+H	C8H10N4O2	68.8	0	pos
neg_3349	13(S)-HpOTrE	metab_10356	5.23e-06	2.12e-05	1.3725	1.3626	0.6817	-0.5527	yes	C04785	-	-	map01100;map00592;map01110	Metabolic pathways;alpha-Linolenic acid metabolism;Biosynthesis of secondary metabolites	Metabolism;Metabolism;Metabolism	Global and overview maps;Lipid metabolism;Global and overview maps	HMDB0301803	Lipids and lipid-like molecules	Fatty Acyls	Lineolic acids and derivatives	67597-26-6	309.207	6.35145	M-H	C18H30O4	42.4	0	neg
neg_6157	Diethyloxalpropionate	metab_13466	3.21e-07	2.43e-06	1.3722	1.3641	0.6282	-0.6707	yes	-	-	-	-	-	-	-	-	-	-	-	-	201.076	4.12383	M-H	C9H14O5	57.1	0	neg
neg_1201	Amabiline	metab_7981	1.83e-05	5.85e-05	1.3718	1.3614	1.505	0.5898	yes	C10263	-	-	-	-	-	-	HMDB0302358	Alkaloids and derivatives	Not Available	Not Available	17958-43-9	304.151	1.91763	M+Na-2H	C15H25NO4	0	33.1	neg
pos_7543	2'-C-Methylcytidine	metab_7207	0.0002473	0.0004858	1.3713	1.3787	1.4687	0.5546	yes	-	-	-	-	-	-	-	HMDB0245530	Nucleosides, nucleotides, and analogues	Pyrimidine nucleosides	Not Available	-	296.066	0.835533	M+K	C10H15N3O5	0	42.6	pos
pos_268	LysoPC(0:0/18:2(9Z,12Z))	metab_1854	1.18e-06	5.04e-06	1.3708	1.3664	1.2441	0.3151	yes	-	-	-	-	-	-	-	HMDB0061700	Lipids and lipid-like molecules	Glycerophospholipids	Glycerophosphocholines	27304-12-7	520.34	6.70287	M+H, M+Na, M+H-H2O	C26H50NO7P	0	76.5	pos
pos_2716	6-Hydroxytrtradeca-9,12-dienoylcarnitine	metab_1895	6.2e-06	2.01e-05	1.3706	1.3617	1.5154	0.5997	yes	-	-	-	-	-	-	-	HMDB0241387	Lipids and lipid-like molecules	Fatty Acyls	Fatty acid esters	-	447.281	4.13265	M+ACN+Na	C21H37NO5	0	33.2	pos
pos_5257	Tyrosyl-Isoleucine	metab_4688	2.3e-08	2.53e-07	1.3698	1.364	0.6603	-0.5989	yes	-	-	-	-	-	-	-	HMDB0029108	Organic acids and derivatives	Carboxylic acids and derivatives	Amino acids, peptides, and analogues	-	259.144	5.7721	M+H-2H2O	C15H22N2O4	0	63.2	pos
neg_6394	Prolyl-Alanine	metab_13726	3.5e-05	9.91e-05	1.3691	1.3636	1.488	0.5734	yes	-	-	-	-	-	-	-	HMDB0029010	Organic acids and derivatives	Carboxylic acids and derivatives	Amino acids, peptides, and analogues	-	431.214	3.87193	2M+Hac-H	C8H14N2O3	0	52.3	neg
neg_5648	Collagen	metab_12901	2.48e-08	3.15e-07	1.3689	1.3643	1.4384	0.5244	yes	C00211	-	-	-	-	-	-	HMDB0303213	Organic acids and derivatives	Carboxylic acids and derivatives	Amino acids, peptides, and analogues	9064-67-9	845.39	4.84137	M+K-2H	C36H60N10O11	0	54.7	neg
pos_6534	12'-Apo-b-carotene-3,12'-diol	metab_6098	1.19e-05	3.46e-05	1.3687	1.3667	1.4051	0.4906	yes	-	-	-	-	-	-	-	HMDB0036054	Lipids and lipid-like molecules	Prenol lipids	Diterpenoids	120021-87-6	413.239	3.3762	M+2Na-H	C25H36O2	0	35.1	pos
pos_6578	Ile Leu Gly	metab_6146	1.11e-05	3.29e-05	1.3687	1.3588	1.4635	0.5494	yes	-	-	-	-	-	-	-	-	-	-	-	-	302.207	3.32055	M+H	C14H27N3O4	72.1	0	pos
pos_3171	Oseltamivir	metab_2399	3.38e-08	3.25e-07	1.3686	1.3635	0.6625	-0.5941	yes	C08092	-	-	-	-	-	-	HMDB0014343;HMDB0035141	Organic acids and derivatives	Carboxylic acids and derivatives	Amino acids, peptides, and analogues	489-20-3;204255-11-8;196618-13-0	354.238	5.48247	M+ACN+H	C16H28N2O4	0	44.2	pos
neg_5010	5,6-Dihydroxyprostaglandin F1a	metab_12196	5.2e-09	9.71e-08	1.3684	1.3679	1.4801	0.5657	yes	C06475	Lipids	Eicosanoids	-	-	-	-	HMDB0012109	Lipids and lipid-like molecules	Fatty Acyls	Eicosanoids	11000-26-3	433.246	5.81318	M+FA-H	C20H36O7	0	44.2	neg
neg_6990	Glycyl-D-proline	metab_14386	5.96e-05	0.0001517	1.3683	1.3679	1.442	0.5281	yes	-	-	-	-	-	-	-	HMDB0252876	Organic acids and derivatives	Carboxylic acids and derivatives	Amino acids, peptides, and analogues	-	389.168	3.2807	2M+FA-H	C7H12N2O3	0	44.3	neg
neg_4726	Cholyllysine	metab_11880	0.0002044	0.0004214	1.3674	1.3542	1.4289	0.5149	yes	-	-	-	-	-	-	-	HMDB0242379	Lipids and lipid-like molecules	Steroids and steroid derivatives	Bile acids, alcohols and derivatives	-	535.375	6.0272	M-H	C30H52N2O6	0	68.9	neg
neg_5492	Alpha-[3-(Nitrosoamino)propyl]-3-pyridinemethanol	metab_12729	0.0006582	0.001148	1.3671	1.3759	1.5867	0.6661	yes	C19581	-	-	map05204;map00980	Chemical carcinogenesis - DNA adducts;Metabolism of xenobiotics by cytochrome P450	Human Diseases;Metabolism	Cancer: overview;Xenobiotics biodegradation and metabolism	HMDB0062443	Organoheterocyclic compounds	Pyridines and derivatives	Not Available	-	389.193	5.08628	2M-H	C9H13N3O2	0	39	neg
neg_5909	5-(3-Methyl-1-triazeno)imidazole-4-carboxamide	metab_13191	1.08e-07	1.05e-06	1.3667	1.3648	0.6213	-0.6866	yes	C16250	-	-	map07040	Antineoplastics - alkylating agents	Drug Development	Chronology: Antineoplastics	HMDB0254938	Organic acids and derivatives	Carboxylic acids and derivatives	Carboxylic acid derivatives	-	203.046	4.45068	M+Cl	C5H8N6O	0	74.2	neg
pos_732	Inproquone	metab_6963	2.42e-10	9.69e-09	1.3665	1.3604	0.7294	-0.4552	yes	-	-	-	-	-	-	-	HMDB0253499	Organic oxygen compounds	Organooxygen compounds	Carbonyl compounds	-	307.165	4.96173	M+H, M+Na	C16H22N2O4	0	32.3	pos
neg_7013	1-Deoxy-D-glucitol	metab_14413	0.000134	0.0002951	1.3659	1.3664	1.4383	0.5243	yes	-	-	-	-	-	-	-	HMDB0041500;LMFA05000598	Organic oxygen compounds	Organooxygen compounds	Carbohydrates and carbohydrate conjugates	18545-96-5	331.162	3.26505	2M-H	C6H14O5	0	34.9	neg
neg_2981	Combretastatin A4	metab_9949	2.48e-07	1.99e-06	1.3653	1.363	0.6759	-0.5651	yes	C20268	-	-	-	-	-	-	HMDB0250413;HMDB0253622	Phenylpropanoids and polyketides	Stilbenes	Not Available	117048-59-6	315.124	5.7857	M-H	C18H20O5	0	38.6	neg
pos_6838	Leu Ile Gln	metab_6433	0.0005633	0.001012	1.3653	1.3755	1.5722	0.6528	yes	-	-	-	-	-	-	-	-	-	-	-	-	373.244	2.96135	M+H	C17H32N4O5	45.8	0	pos
neg_6050	(2R)-2-Acetamido-6-hydroxy-2-(sulfanylmethyl)hex-3-enoic acid	metab_13348	1.02e-07	1.01e-06	1.3648	1.3628	0.6423	-0.6386	yes	-	-	-	-	-	-	-	HMDB0257715	Organic acids and derivatives	Carboxylic acids and derivatives	Amino acids, peptides, and analogues	-	254.049	4.24918	M+Na-2H	C9H15NO4S	0	48.4	neg
pos_5973	N-(3,4-dimethoxyphenyl)-2-(1-methylpyrrol-2-yl)-2-oxoacetamide	metab_5476	1.66e-08	2.04e-07	1.3648	1.3562	0.6765	-0.5638	yes	-	-	-	-	-	-	-	-	-	-	-	-	289.118	4.29402	M+H	C15H16N2O4	45.5	0	pos
pos_2677	Antramycin	metab_1851	1.54e-05	4.34e-05	1.3647	1.3719	1.5691	0.65	yes	-	-	-	-	-	-	-	HMDB0248464	Organoheterocyclic compounds	Benzodiazepines	1,4-benzodiazepines	-	348.155	4.02797	M+CH3OH+H	C16H17N3O4	0	60.7	pos
pos_4492	3-Methyl-5-pentyl-2-furantridecanoic acid	metab_3847	3.16e-08	3.12e-07	1.3647	1.3605	0.7396	-0.4352	yes	-	-	-	-	-	-	-	HMDB0061648	Lipids and lipid-like molecules	Fatty Acyls	Fatty acids and conjugates	57818-42-5	387.289	6.6394	M+Na	C23H40O3	0	65.3	pos
neg_3384	Arachidonoyl Serinol	metab_10395	0.003204	0.004751	1.3646	1.4087	1.5499	0.6322	yes	-	-	-	-	-	-	-	HMDB0013650	Lipids and lipid-like molecules	Fatty Acyls	Fatty amides	183718-70-9	398.266	6.41385	M+Na-2H	C23H39NO3	0	34.2	neg
pos_6833	Butyl (S)-3-hydroxybutyrate [arabinosyl-(1->6)-glucoside]	metab_6428	0.000333	0.0006342	1.3645	1.3668	1.4394	0.5255	yes	-	-	-	-	-	-	-	HMDB0039214	Lipids and lipid-like molecules	Fatty Acyls	Fatty acyl glycosides	-	472.24	2.96935	M+NH4	C19H34O12	0	57	pos
pos_6592	Hydroxyprolyl-Proline	metab_6162	2.5e-06	9.38e-06	1.3638	1.3637	1.4573	0.5433	yes	-	-	-	-	-	-	-	HMDB0028871	Organic acids and derivatives	Carboxylic acids and derivatives	Amino acids, peptides, and analogues	-	474.256	3.29703	2M+NH4	C10H16N2O4	0	47.5	pos
neg_6262	Deoxyloganin	metab_13580	0.0008219	0.001402	1.3633	1.3737	1.5672	0.6482	yes	C06071	-	-	map01100;map01110;map00902;map01062	Metabolic pathways;Biosynthesis of secondary metabolites;Monoterpenoid biosynthesis;Biosynthesis of terpenoids and steroids	Metabolism;Metabolism;Metabolism;Metabolism	Global and overview maps;Global and overview maps;Metabolism of terpenoids and polyketides;Chemical structure transformation maps	LMPR0102070005;HMDB0251007	Lipids and lipid-like molecules	Prenol lipids	Terpene glycosides	26660-57-1	419.158	4.01348	M+FA-H	C17H26O9	0	52.7	neg
pos_5857	Olamufloxacin	metab_5347	2.26e-09	4.61e-08	1.3633	1.3619	1.4072	0.4928	yes	-	-	-	-	-	-	-	HMDB0255928	Organoheterocyclic compounds	Quinolines and derivatives	Quinoline carboxylic acids	-	790.383	4.50322	2M+NH4	C20H23FN4O3	0	59.1	pos
pos_5500	Desacetyllevonantradol	metab_4955	1.69e-05	4.7e-05	1.3629	1.3569	0.6702	-0.5774	yes	-	-	-	-	-	-	-	HMDB0251028	Organoheterocyclic compounds	Quinolines and derivatives	Benzoquinolines	-	418.233	5.24977	M+Na	C25H33NO3	0	44.2	pos
neg_1323	Glu Lys Ser Glu	metab_8116	0.0004299	0.0007857	1.3618	1.3603	1.3856	0.4705	yes	-	-	-	-	-	-	-	-	-	-	-	-	490.216	3.2331	M-H	C19H33N5O10	43.5	0	neg
pos_3389	[6]-Gingerdiol 3-acetate	metab_2636	0.001853	0.00291	1.3603	1.3431	0.652	-0.6171	yes	-	-	-	-	-	-	-	HMDB0040566	Lipids and lipid-like molecules	Fatty Acyls	Fatty alcohol esters	143519-17-9	356.243	6.04348	M+NH4	C19H30O5	0	67.7	pos
neg_6092	2-n-Propyl-4-oxopentanoic acid	metab_13394	4.05e-05	0.0001115	1.3603	1.3469	0.6379	-0.6486	yes	C16655	-	-	map00982	Drug metabolism - cytochrome P450	Metabolism	Xenobiotics biodegradation and metabolism	HMDB0060683;PW_C040565	Organic acids and derivatives	Keto acids and derivatives	Gamma-keto acids and derivatives	-	203.092	4.20215	M+FA-H	C8H14O3	0	66.2	neg
pos_7361	D-Digitoxose	metab_7009	1.84e-07	1.12e-06	1.3601	1.3569	0.705	-0.5043	yes	C21045	-	-	-	-	-	-	HMDB0251279	Organic oxygen compounds	Organooxygen compounds	Carbohydrates and carbohydrate conjugates	-	190.107	1.39013	M+ACN+H	C6H12O4	0	53.2	pos
pos_229	LysoPC(20:4(8Z,11Z,14Z,17Z)/0:0)	metab_1425	1.41e-06	5.83e-06	1.3601	1.3603	1.2589	0.3321	yes	C04230	Lipids	Phospholipids	map00564;map05231	Glycerophospholipid metabolism;Choline metabolism in cancer	Metabolism;Human Diseases	Lipid metabolism;Cancer: overview	HMDB0010396	Lipids and lipid-like molecules	Glycerophospholipids	Glycerophosphocholines	-	544.339	6.62358	M+H, M+Na, M+H-H2O	C28H50NO7P	0	81.9	pos
neg_5057	5H-Indazole-5,5-dicarboxylicacid, 1,2,3,4,6,7-hexahydro-3-oxo-	metab_12247	6.04e-05	0.0001533	1.3594	1.352	0.6088	-0.716	yes	-	-	-	-	-	-	-	HMDB0244329	Organoheterocyclic compounds	Azolines	Pyrazolines	-	207.041	5.73968	M-H2O-H	C9H10N2O5	0	30.6	neg
pos_6968	Thymidine	metab_6576	0.003877	0.005628	1.3592	1.352	0.4851	-1.0437	yes	C00214	Nucleic acids	Nucleosides	map00240;map01100	Pyrimidine metabolism;Metabolic pathways	Metabolism;Metabolism	Nucleotide metabolism;Global and overview maps	PW_C000187;HMDB0000273;MJDBOTE0000448	Nucleosides, nucleotides, and analogues	Pyrimidine nucleosides	Pyrimidine 2''-deoxyribonucleosides	50-89-5	275.123	2.8037	M+CH3OH+H	C10H14N2O5	0	32.1	pos
pos_2249	Levomefolic acid	metab_1381	0.0003899	0.0007296	1.3585	1.3692	1.5096	0.5942	yes	C00440	-	-	map01100;map01200;map01120;map00720;map01523;map00670	Metabolic pathways;Carbon metabolism;Microbial metabolism in diverse environments;Carbon fixation pathways in prokaryotes;Antifolate resistance;One carbon pool by folate	Metabolism;Metabolism;Metabolism;Metabolism;Human Diseases;Metabolism	Global and overview maps;Global and overview maps;Global and overview maps;Energy metabolism;Drug resistance: antineoplastic;Metabolism of cofactors and vitamins	HMDB0254053;HMDB0001396	Organoheterocyclic compounds	Pteridines and derivatives	Pterins and derivatives	134-35-0	424.171	3.05703	M+H-2H2O	C20H25N7O6	0	35.5	pos
neg_6469	20-Hydroxy-leukotriene E4	metab_13809	0.0002007	0.0004152	1.3583	1.3605	1.4408	0.5269	yes	C03577	-	-	map00590	Arachidonic acid metabolism	Metabolism	Lipid metabolism	LMFA03020062;HMDB0012639;LMFA03020025	Lipids and lipid-like molecules	Fatty Acyls	Eicosanoids	111844-33-8	500.236	3.793	M+FA-H	C23H37NO6S	0	80.6	neg
neg_5169	Ampicilloyl	metab_12371	4.47e-10	1.51e-08	1.358	1.3563	1.4889	0.5742	yes	-	-	-	-	-	-	-	HMDB0248360	Organic acids and derivatives	Carboxylic acids and derivatives	Amino acids, peptides, and analogues	-	400.107	5.5652	M+Cl	C17H23N3O4S	0	39.2	neg
neg_286	3-Methoxytyramine	metab_9816	0.002279	0.003488	1.3573	1.3701	1.5777	0.6578	yes	C05587	-	-	map01100;map01063;map00965;map00350;map04728	Metabolic pathways;Biosynthesis of alkaloids derived from shikimate pathway;Betalain biosynthesis;Tyrosine metabolism;Dopaminergic synapse	Metabolism;Metabolism;Metabolism;Metabolism;Organismal Systems	Global and overview maps;Chemical structure transformation maps;Biosynthesis of other secondary metabolites;Amino acid metabolism;Nervous system	PW_C000015;HMDB0259535;HMDB0000022	Benzenoids	Phenols	Benzenediols	554-52-9	500.273	4.65618	M-H2O-H, 3M-H	C9H13NO2	0	51.4	neg
neg_4532	Avocadyne	metab_11666	0.007462	0.0102	1.3566	1.3505	0.5856	-0.7721	yes	-	-	-	-	-	-	-	LMFA05000643;HMDB0035473	Lipids and lipid-like molecules	Fatty Acyls	Fatty alcohols	129099-96-3	265.217	6.3203	M-H2O-H	C17H32O3	0	52.2	neg
neg_1741	Pyropheophorbide a	metab_8579	6.08e-05	0.000154	1.3555	1.3379	1.4462	0.5322	yes	C18064	-	-	map01110;map00860	Biosynthesis of secondary metabolites;Porphyrin and chlorophyll metabolism	Metabolism;Metabolism	Global and overview maps;Metabolism of cofactors and vitamins	HMDB0256993	Not Available	Not Available	Not Available	-	515.247	3.714	M-H2O-H	C33H34N4O3	0	59.5	neg
pos_5650	Difloxacin	metab_5120	5.15e-06	1.72e-05	1.3553	1.3463	0.6567	-0.6068	yes	C11234	-	-	-	-	-	-	HMDB0251259	Organoheterocyclic compounds	Quinolines and derivatives	Phenylquinolines	98106-17-3	417.176	4.94572	M+NH4	C21H19F2N3O3	72.8	0	pos
neg_6627	Asp Leu Ala Glu	metab_13984	1.46e-07	1.36e-06	1.3553	1.3462	1.4842	0.5696	yes	-	-	-	-	-	-	-	-	-	-	-	-	445.194	3.6193	M-H	C18H30N4O9	43	0	neg
neg_3016	N-Eicosapentaenoyl Glutamic acid	metab_9989	8.8e-07	5.32e-06	1.3549	1.3549	0.6576	-0.6048	yes	-	-	-	-	-	-	-	HMDB0242070	Not Available	Not Available	Not Available	-	466.234	5.83668	M+Cl	C25H37NO5	0	52	neg
pos_2155	MG(0:0/5-iso PGF2VI/0:0)	metab_1278	1.83e-09	4.04e-08	1.3549	1.351	1.4413	0.5274	yes	-	-	-	-	-	-	-	HMDB0260537	Not Available	Not Available	Not Available	-	442.277	2.87382	M+ACN+H	C21H36O7	0	38.1	pos
neg_5561	PG(LTE4/22:5(7Z,10Z,13Z,16Z,19Z))	metab_12806	2.44e-08	3.12e-07	1.3543	1.35	1.4639	0.5498	yes	-	-	-	-	-	-	-	HMDB0270357	Not Available	Not Available	Not Available	-	1016.48	4.98267	M+K-2H	C51H82NO13PS	0	88.2	neg
pos_3660	Doxercalciferol	metab_2931	5.33e-09	8.79e-08	1.3522	1.3446	0.7797	-0.359	yes	C08211	-	-	-	-	-	-	HMDB0251601;LMST03010069	Lipids and lipid-like molecules	Steroids and steroid derivatives	Vitamin D and derivatives	54573-75-0	445.367	6.82223	M+CH3OH+H	C28H44O2	0	66.3	pos
pos_923	(10Z)-Pentadec-10-enoylcarnitine	metab_7610	2.97e-08	2.96e-07	1.3511	1.3517	0.7488	-0.4173	yes	-	-	-	-	-	-	-	HMDB0241436	Lipids and lipid-like molecules	Fatty Acyls	Fatty acid esters	-	425.341	6.50427	M+H-H2O, M+ACN+H	C22H41NO4	0	36.4	pos
neg_7278	Citric Acid	metab_14703	1.85e-06	9.36e-06	1.3511	1.3493	1.3992	0.4846	yes	C00158	Organic acids	Carboxylic acids	map00997;map01240;map01200;map01110;map00020;map00630;map04922;map01066;map01065;map01064;map01063;map01062;map01061;map01060;map01100;map01120;map01210;map01230;map04742;map00720;map02020;map01053;map00250;map05230;map01070	Biosynthesis of various secondary metabolites - part 3;Biosynthesis of cofactors;Carbon metabolism;Biosynthesis of secondary metabolites;Citrate cycle (TCA cycle);Glyoxylate and dicarboxylate metabolism;Glucagon signaling pathway;Biosynthesis of alkaloids derived from terpenoid and polyketide;Biosynthesis of alkaloids derived from histidine and purine;Biosynthesis of alkaloids derived from ornith…	Metabolism;Metabolism;Metabolism;Metabolism;Metabolism;Metabolism;Organismal Systems;Metabolism;Metabolism;Metabolism;Metabolism;Metabolism;Metabolism;Metabolism;Metabolism;Metabolism;Metabolism;Metabolism;Organismal Systems;Metabolism;Environmental Information Processing;Metabolism;Metabolism;Human Diseases;Metabolism	Biosynthesis of other secondary metabolites;Global and overview maps;Global and overview maps;Global and overview maps;Carbohydrate metabolism;Carbohydrate metabolism;Endocrine system;Chemical structure transformation maps;Chemical structure transformation maps;Chemical structure transformation maps;Chemical structure transformation maps;Chemical structure transformation maps;Chemical structure t…	PW_C000063;HMDB0000094;MJDBNL00000139	Organic acids and derivatives	Carboxylic acids and derivatives	Tricarboxylic acids and derivatives	77-92-9	191.019	1.479	M-H	C6H8O7	75.8	0	neg
pos_6731	Formyl-5-hydroxykynurenamine	metab_6315	2.94e-08	2.93e-07	1.3507	1.3444	0.6624	-0.5942	yes	C05647	-	-	map00380	Tryptophan metabolism	Metabolism	Amino acid metabolism	PW_C008135;HMDB0012948	Organic oxygen compounds	Organooxygen compounds	Carbonyl compounds	958733-17-0	209.092	3.1052	M+H	C10H12N2O3	0	44.1	pos
neg_7228	Methionyl-Serine	metab_14649	0.0001039	0.0002396	1.3505	1.3491	1.4902	0.5756	yes	-	-	-	-	-	-	-	HMDB0028982	Organic acids and derivatives	Carboxylic acids and derivatives	Amino acids, peptides, and analogues	-	235.076	1.8316	M-H	C8H16N2O4S	0	51.5	neg
pos_6128	(2-Pyridin-3-ylpyrrolidin-1-yl)methanol	metab_5649	1.29e-09	3.16e-08	1.3493	1.3449	0.703	-0.5083	yes	-	-	-	-	-	-	-	HMDB0242480	Organoheterocyclic compounds	Pyridines and derivatives	Pyrrolidinylpyridines	-	374.253	4.00333	2M+NH4	C10H14N2O	0	33.9	pos
pos_3494	Glycohyocholic Acid	metab_2751	7.58e-06	2.38e-05	1.3487	1.3338	1.3448	0.4274	yes	-	-	-	-	-	-	-	HMDB0242179;HMDB0240607;MJDBDZS0000030	Lipids and lipid-like molecules	Steroids and steroid derivatives	Bile acids, alcohols and derivatives	32747-08-3	466.316	6.26568	M+H	C26H43NO6	30.3	0	pos
pos_3222	Nicotine glucuronide	metab_2455	3.34e-07	1.8e-06	1.3483	1.3389	0.7103	-0.4936	yes	-	-	-	-	-	-	-	PW_C000985;HMDB0001272	Nucleosides, nucleotides, and analogues	Purine nucleotides	Purine ribonucleotides	152306-59-7	303.134	5.67548	M+H-2H2O	C16H22N2O6	0	48.5	pos
pos_6028	3-(naphthalen-1-ylmethyl)-1h-pyrazolo[3,4-d]pyrimidin-4-Amine	metab_5538	5.33e-07	2.65e-06	1.3481	1.3466	0.6428	-0.6375	yes	-	-	-	-	-	-	-	-	-	-	-	-	276.126	4.1893	M+H	C16H13N5	33.9	0	pos
pos_2262	Trp Asn	metab_1395	2.46e-06	9.24e-06	1.3479	1.3411	1.4894	0.5748	yes	-	-	-	-	-	-	-	-	-	-	-	-	319.14	3.08088	M+H	C15H18N4O4	58.1	0	pos
neg_1988	Calystegin A3	metab_8852	1.24e-08	1.88e-07	1.3472	1.338	1.4311	0.5172	yes	C10850	-	-	map00960	Tropane, piperidine and pyridine alkaloid biosynthesis	Metabolism	Biosynthesis of other secondary metabolites	HMDB0038593	Alkaloids and derivatives	Tropane alkaloids	Not Available	131580-36-4	363.177	4.05267	2M+FA-H	C7H13NO3	0	58.4	neg
neg_2067	11,13-Dihydrotaraxinic acid glucosyl ester	metab_8940	1.7e-06	8.8e-06	1.3469	1.3329	1.5154	0.5997	yes	-	-	-	-	-	-	-	HMDB0035867	Lipids and lipid-like molecules	Saccharolipids	Not Available	75911-16-9	407.167	4.14732	M-H2O-H	C21H30O9	0	58.2	neg
pos_5749	Cocaine-alcohol	metab_5228	7.33e-08	5.7e-07	1.3466	1.3424	0.712	-0.49	yes	-	-	-	-	-	-	-	HMDB0250390	Benzenoids	Benzene and substituted derivatives	Benzoic acids and derivatives	-	337.175	4.73635	M+NH4	C17H21NO5	0	68.6	pos
neg_6277	Cyclohexyl-[cyclohexyl(sulfo)amino]sulfamic acid	metab_13596	0.0007942	0.001362	1.3466	1.323	0.6388	-0.6466	yes	-	-	-	-	-	-	-	HMDB0257601	Organic acids and derivatives	Sulfamic acid derivatives	Cyclamates	-	391.074	3.99718	M+Cl	C12H24N2O6S2	0	44.2	neg
neg_6561	Deoxynivalenol	metab_13911	5.28e-10	1.69e-08	1.3449	1.343	1.4388	0.5248	yes	C09747	-	-	-	-	-	-	HMDB0036156	Lipids and lipid-like molecules	Prenol lipids	Sesquiterpenoids	51481-10-8	637.248	3.68263	2M+FA-H	C15H20O6	0	49.1	neg
neg_1102	Valylaspartic acid	metab_7872	0.0003794	0.0007053	1.3447	1.3534	1.4023	0.4878	yes	-	-	-	-	-	-	-	HMDB0029123	Organic acids and derivatives	Carboxylic acids and derivatives	Amino acids, peptides, and analogues	20556-16-5	231.098	1.22028	M-H	C9H16N2O5	0	42	neg
pos_1323	Stallimycin	metab_360	3.53e-08	3.37e-07	1.3446	1.344	0.7442	-0.4263	yes	-	-	-	-	-	-	-	HMDB0251483	Organic nitrogen compounds	Organonitrogen compounds	N-arylamides	-	482.228	6.06733	M+H-H2O, M+H	C22H27N9O4	0	56.5	pos
pos_2498	Trp Val Asp	metab_1655	8.08e-06	2.51e-05	1.3439	1.3474	1.4819	0.5674	yes	-	-	-	-	-	-	-	-	-	-	-	-	419.193	3.6092	M+H	C20H26N4O6	62.1	0	pos
pos_5183	Sterculic acid	metab_4607	0.001378	0.002235	1.3425	1.3421	0.5859	-0.7712	yes	C08366	-	-	map01060	Biosynthesis of plant secondary metabolites	Metabolism	Chemical structure transformation maps	HMDB0258495;LMFA01140018;HMDB0304490	Lipids and lipid-like molecules	Fatty Acyls	Fatty acids and conjugates	738-87-4	339.227	5.8918	M+2Na-H	C19H34O2	0	57	pos
pos_2591	Niazidin	metab_1759	3.41e-05	8.57e-05	1.3424	1.335	0.6695	-0.5787	yes	-	-	-	-	-	-	-	HMDB0031981	Not Available	Not Available	Not Available	198969-42-5	387.122	3.82597	M+CH3OH+H	C15H18N2O6S	0	36.7	pos
neg_6073	LysoPC(14:1(9Z)/0:0)	metab_13373	0.0006488	0.001135	1.3419	1.3431	1.5008	0.5857	yes	C04230	Lipids	Phospholipids	map00564;map05231	Glycerophospholipid metabolism;Choline metabolism in cancer	Metabolism;Human Diseases	Lipid metabolism;Cancer: overview	HMDB0010380	Lipids and lipid-like molecules	Glycerophospholipids	Glycerophosphocholines	-	486.257	4.21782	M+Na-2H	C22H44NO7P	0	37.9	neg
pos_7136	1-Methylcytosine	metab_6764	7.93e-08	5.93e-07	1.3417	1.3322	0.6988	-0.5171	yes	-	-	-	-	-	-	-	HMDB0243939	Organoheterocyclic compounds	Diazines	Pyrimidines and pyrimidine derivatives	-	126.066	2.636	M+H	C5H7N3O	0	30.1	pos
pos_1862	N-Acetyl-1-methylhistidine	metab_955	0.001798	0.002833	1.3413	1.3804	0.6407	-0.6423	yes	-	-	-	-	-	-	-	HMDB0240340	Organic acids and derivatives	Carboxylic acids and derivatives	Amino acids, peptides, and analogues	84285-33-6	212.103	1.28652	M+H	C9H13N3O3	0	44.9	pos
pos_5001	Dermorphin	metab_4409	6.92e-09	1.09e-07	1.341	1.3399	1.3736	0.4579	yes	C20030	-	-	-	-	-	-	HMDB0251025	Organic acids and derivatives	Carboxylic acids and derivatives	Amino acids, peptides, and analogues	77614-16-5	767.35	6.05937	M+H-2H2O	C40H50N8O10	0	37	pos
neg_2883	Kanokoside D	metab_9842	7.56e-05	0.0001843	1.3403	1.3451	0.671	-0.5757	yes	C17431	-	-	-	-	-	-	HMDB0036105	Lipids and lipid-like molecules	Prenol lipids	Terpene glycosides	64703-88-4	669.26	5.5711	M+FA-H	C27H44O16	0	61.1	neg
neg_5027	Cis-4-Hydroxycyclohexylacetic acid	metab_12214	0.0001248	0.0002784	1.3402	1.3328	0.6427	-0.6378	yes	-	-	-	-	-	-	-	HMDB0000451	Organic oxygen compounds	Organooxygen compounds	Alcohols and polyols	68592-22-3	375.202	5.79305	2M+Hac-H	C8H14O3	0	37	neg
pos_2049	Dermatan L-iduronate	metab_7711	2.88e-06	1.06e-05	1.3396	1.3305	0.6755	-0.566	yes	C01490	-	-	map01100;map00532	Metabolic pathways;Glycosaminoglycan biosynthesis - chondroitin sulfate / dermatan sulfate	Metabolism;Metabolism	Global and overview maps;Glycan biosynthesis and metabolism	HMDB0060470;HMDB0000632	Organic oxygen compounds	Organooxygen compounds	Carbohydrates and carbohydrate conjugates	24967-94-0	410.167	2.66798	M+H	C16H27NO11	0	86.7	pos
pos_2054	Protopine	metab_1167	1.54e-05	4.35e-05	1.3394	1.3434	1.4432	0.5293	yes	C05189	-	-	map00950;map01100;map01110;map01063	Isoquinoline alkaloid biosynthesis;Metabolic pathways;Biosynthesis of secondary metabolites;Biosynthesis of alkaloids derived from shikimate pathway	Metabolism;Metabolism;Metabolism;Metabolism	Biosynthesis of other secondary metabolites;Global and overview maps;Global and overview maps;Chemical structure transformation maps	HMDB0003920;MJDBOTE0000958	Alkaloids and derivatives	Protopine alkaloids	Not Available	130-86-9	336.122	2.676	M+H-H2O	C20H19NO5	0	35	pos
neg_2482	Phenyl-Alanine	metab_9398	2.68e-07	2.12e-06	1.339	1.3348	0.6757	-0.5655	yes	C00079	Peptides	Amino acids	map01100;map04978;map01110;map00970;map00460;map00960;map02010;map00998;map01230;map00966;map01210;map00940;map01070;map00360;map04974;map00400;map01064;map01063;map05230;map01061;map01060	Metabolic pathways;Mineral absorption;Biosynthesis of secondary metabolites;Aminoacyl-tRNA biosynthesis;Cyanoamino acid metabolism;Tropane, piperidine and pyridine alkaloid biosynthesis;ABC transporters;Biosynthesis of various secondary metabolites - part 2;Biosynthesis of amino acids;Glucosinolate biosynthesis;2-Oxocarboxylic acid metabolism;Phenylpropanoid biosynthesis;Biosynthesis of plant hor…	Metabolism;Organismal Systems;Metabolism;Genetic Information Processing;Metabolism;Metabolism;Environmental Information Processing;Metabolism;Metabolism;Metabolism;Metabolism;Metabolism;Metabolism;Metabolism;Organismal Systems;Metabolism;Metabolism;Metabolism;Human Diseases;Metabolism;Metabolism	Global and overview maps;Digestive system;Global and overview maps;Translation;Metabolism of other amino acids;Biosynthesis of other secondary metabolites;Membrane transport;Biosynthesis of other secondary metabolites;Global and overview maps;Biosynthesis of other secondary metabolites;Global and overview maps;Biosynthesis of other secondary metabolites;Chemical structure transformation maps;Amin…	HMDB0000159;HMDB0256428	Organic acids and derivatives	Carboxylic acids and derivatives	Amino acids, peptides, and analogues	63-91-2	146.06	4.88793	M-H2O-H	C9H11NO2	0	35.7	neg
pos_5580	CDP-DG(i-21:0/18:1(12Z)-2OH(9,10))	metab_5043	1.12e-05	3.31e-05	1.3389	1.3435	1.4574	0.5434	yes	-	-	-	-	-	-	-	HMDB0294247	Not Available	Not Available	Not Available	-	541.81	5.08175	M+2H	C51H93N3O17P2	0	41.4	pos
pos_6139	3-Hexenoic acid	metab_5661	0.0001663	0.0003427	1.3389	1.3332	0.5711	-0.8082	yes	-	-	-	-	-	-	-	LMFA01030009;HMDB0031501	Lipids and lipid-like molecules	Fatty Acyls	Fatty acids and conjugates	4219-24-3	246.17	3.99532	2M+NH4	C6H10O2	0	33.4	pos
pos_1935	Trimethaphan	metab_1035	2.68e-10	1.01e-08	1.3386	1.3352	1.4179	0.5037	yes	C07174	-	-	-	-	-	-	HMDB0015248	Organoheterocyclic compounds	Thienoimidazolidines	Not Available	7187-66-8	383.203	1.78957	M+NH4	C22H25N2OS+	0	34.7	pos
neg_7384	Gamma-Glutamylglutamine	metab_14819	0.0002275	0.0004597	1.3383	1.3402	1.445	0.5311	yes	C05283	-	-	-	-	-	-	HMDB0029147;HMDB0011738	Organic acids and derivatives	Carboxylic acids and derivatives	Amino acids, peptides, and analogues	1466-50-8;10148-81-9	274.104	0.961717	M-H	C10H17N3O6	77.7	0	neg
neg_1787	Dodeca-4,7,10-trienedioylcarnitine	metab_8629	4.91e-06	2.02e-05	1.3377	1.3319	1.461	0.547	yes	-	-	-	-	-	-	-	HMDB0241281	Lipids and lipid-like molecules	Fatty Acyls	Fatty acid esters	-	388.173	3.78517	M+Na-2H	C19H29NO6	0	35.5	neg
neg_2318	Seglitide	metab_9218	2.14e-09	4.79e-08	1.3367	1.336	1.4485	0.5345	yes	-	-	-	-	-	-	-	HMDB0258209	Organic acids and derivatives	Carboxylic acids and derivatives	Amino acids, peptides, and analogues	-	853.418	4.56745	M+FA-H	C44H56N8O7	0	69.6	neg
pos_3328	1,10-Epoxy-3,8-dihydroxy-4,11(13)-germacradien-12,6-olide	metab_2570	5.72e-08	4.72e-07	1.336	1.3316	1.5273	0.611	yes	-	-	-	-	-	-	-	HMDB0303776	Lipids and lipid-like molecules	Prenol lipids	Terpene lactones	-	322.165	5.93182	M+ACN+H	C15H20O5	0	48.2	pos
pos_5770	5-Deoxykievitone	metab_5251	1.43e-07	9.24e-07	1.3355	1.3354	1.5124	0.5968	yes	C10418	-	-	-	-	-	-	HMDB0034214	Phenylpropanoids and polyketides	Isoflavonoids	Isoflavans	74161-24-3	305.116	4.68837	M+H-2H2O	C20H20O5	0	52.5	pos
pos_6430	Betavulgaroside II	metab_5985	5e-09	8.4e-08	1.3352	1.3314	1.379	0.4637	yes	-	-	-	-	-	-	-	HMDB0040771	Lipids and lipid-like molecules	Prenol lipids	Triterpenoids	168010-05-7	757.373	3.52862	M+H-2H2O	C41H60O15	0	32.8	pos
neg_5278	Gein	metab_12492	1.58e-07	1.45e-06	1.3343	1.3347	1.5083	0.5929	yes	C17058	Steroids	24-Carbon atoms	-	-	-	-	HMDB0029909	Organic oxygen compounds	Organooxygen compounds	Carbohydrates and carbohydrate conjugates	585-90-0	493.146	5.39572	M+Cl	C21H30O11	0	37.8	neg
pos_3645	V-Pyrro/NO	metab_2914	3.6e-09	6.5e-08	1.3342	1.3316	0.6663	-0.5857	yes	-	-	-	-	-	-	-	HMDB0259734	Organoheterocyclic compounds	Pyrrolidines	Not Available	-	122.073	6.79845	M+H-2H2O	C6H11N3O2	0	39.5	pos
pos_6558	Ile Ile Asn	metab_6124	7.14e-10	2.06e-08	1.3336	1.3304	1.4338	0.5198	yes	-	-	-	-	-	-	-	-	-	-	-	-	359.229	3.34438	M+H	C16H30N4O5	40.2	0	pos
neg_1300	Calanolide A	metab_8091	0.001316	0.002132	1.3331	1.3469	1.4549	0.5409	yes	C09147	-	-	-	-	-	-	HMDB0249535	Phenylpropanoids and polyketides	Coumarins and derivatives	Pyranocoumarins	142632-32-4	405.145	3.20182	M+Cl	C22H26O5	0	52.6	neg
pos_749	8-Hydroxycarteolol	metab_7147	2.39e-10	9.63e-09	1.3322	1.3261	0.7303	-0.4534	yes	-	-	-	-	-	-	-	HMDB0060990	Organoheterocyclic compounds	Quinolines and derivatives	Quinolones and derivatives	-	309.18	5.12177	M+H, M+Na	C16H24N2O4	0	66	pos
neg_6012	3,6-Ditigloyloxytropan-7-ol	metab_13306	2.02e-06	9.94e-06	1.332	1.3278	1.4698	0.5557	yes	-	-	-	-	-	-	-	HMDB0029325	Alkaloids and derivatives	Tropane alkaloids	Not Available	7159-86-6	358.162	4.31257	M+Na-2H	C18H27NO5	0	31.9	neg
neg_6054	16b-Hydroxyestrone	metab_13352	9.21e-06	3.34e-05	1.3318	1.3257	1.5814	0.6612	yes	C05300	Hormones and transmitters	Steroid hormones	map01100;map00140	Metabolic pathways;Steroid hormone biosynthesis	Metabolism;Metabolism	Global and overview maps;Lipid metabolism	HMDB0000313;LMST02010046	Lipids and lipid-like molecules	Steroids and steroid derivatives	Estrane steroids	966-06-3	307.13	4.24135	M+Na-2H	C18H22O3	0	52.8	neg
neg_1241	Quetiapine Sulfoxide	metab_8025	5.88e-06	2.33e-05	1.3311	1.333	1.4525	0.5386	yes	-	-	-	-	-	-	-	HMDB0257023	Organoheterocyclic compounds	Benzothiazepines	Dibenzothiazepines	-	434.13	2.74013	M+Cl	C21H25N3O3S	0	33.8	neg
pos_3200	Hexenoylcarnitine	metab_2432	3.84e-05	9.5e-05	1.3306	1.3206	0.657	-0.606	yes	-	-	-	-	-	-	-	HMDB0253155	Organic acids and derivatives	Keto acids and derivatives	Medium-chain keto acids and derivatives	-	290.196	5.587	M+CH3OH+H	C13H23NO4	0	40.5	pos
neg_4951	D-(+)-dihydrocarvone	metab_12129	2.7e-05	8.08e-05	1.3304	1.3164	0.6396	-0.6448	yes	C11398	-	-	map01220;map00903	Degradation of aromatic compounds;Limonene and pinene degradation	Metabolism;Metabolism	Global and overview maps;Metabolism of terpenoids and polyketides	HMDB0302236	Lipids and lipid-like molecules	Prenol lipids	Monoterpenoids	-	197.118	5.87652	M+FA-H	C10H16O	0	33.5	neg
pos_7094	Ala Met Glu	metab_6717	3.42e-05	8.61e-05	1.3291	1.3375	1.4313	0.5173	yes	-	-	-	-	-	-	-	-	-	-	-	-	350.138	2.70018	M+H	C13H23N3O6S	49.4	0	pos
neg_2169	PA(8:0/10:0)	metab_9053	7.99e-11	4.79e-09	1.3288	1.3257	1.4976	0.5826	yes	C00416	Lipids	Phospholipids	map01100;map00564;map01110;map00561;map05212;map05200;map04975;map04024;map05231;map04072;map04912;map04070;map04666	Metabolic pathways;Glycerophospholipid metabolism;Biosynthesis of secondary metabolites;Glycerolipid metabolism;Pancreatic cancer;Pathways in cancer;Fat digestion and absorption;cAMP signaling pathway;Choline metabolism in cancer;Phospholipase D signaling pathway;GnRH signaling pathway;Phosphatidylinositol signaling system;Fc gamma R-mediated phagocytosis	Metabolism;Metabolism;Metabolism;Metabolism;Human Diseases;Human Diseases;Organismal Systems;Environmental Information Processing;Human Diseases;Environmental Information Processing;Organismal Systems;Environmental Information Processing;Organismal Systems	Global and overview maps;Lipid metabolism;Global and overview maps;Lipid metabolism;Cancer: specific types;Cancer: overview;Digestive system;Signal transduction;Cancer: overview;Signal transduction;Endocrine system;Signal transduction;Immune system	PW_C062908;HMDB0115482	Lipids and lipid-like molecules	Glycerophospholipids	Glycerophosphates	-	473.226	4.31257	M+Na-2H	C21H41O8P	0	53.2	neg
neg_6577	Imidaprilat	metab_13928	7.93e-05	0.0001906	1.3287	1.3334	1.4594	0.5454	yes	C21519	-	-	-	-	-	-	HMDB0041908;HMDB0244459	Organic acids and derivatives	Carboxylic acids and derivatives	Amino acids, peptides, and analogues	89371-44-8	422.157	3.66632	M+FA-H	C18H23N3O6	0	70.2	neg
pos_5648	Melongoside P	metab_5117	2.61e-08	2.74e-07	1.3286	1.3281	1.4428	0.5288	yes	-	-	-	-	-	-	-	HMDB0030050	Lipids and lipid-like molecules	Steroids and steroid derivatives	Steroidal glycosides	98508-45-3	556.27	4.95373	M+2Na	C51H86O23	0	36.9	pos
neg_208	3-Hydroxypropyl methacrylate	metab_8954	1.64e-05	5.32e-05	1.3278	1.3134	0.6666	-0.5851	yes	-	-	-	-	-	-	-	HMDB0245905	Organic acids and derivatives	Carboxylic acids and derivatives	Carboxylic acid derivatives	-	189.076	3.8563	M+Cl, M+FA-H	C7H12O3	0	39.6	neg
pos_6218	Amastatin	metab_5749	0.0001454	0.0003055	1.3269	1.3246	1.4407	0.5268	yes	C01552	-	-	-	-	-	-	HMDB0248277	Organic acids and derivatives	Peptidomimetics	Hybrid peptides	67655-94-1;69400-55-1	457.266	3.86662	M+H-H2O	C21H38N4O8	0	44.4	pos
pos_3038	Rutacridone	metab_2251	8.12e-05	0.0001827	1.326	1.3157	0.6803	-0.5558	yes	C10738	-	-	map01058;map01110;map01063	Acridone alkaloid biosynthesis;Biosynthesis of secondary metabolites;Biosynthesis of alkaloids derived from shikimate pathway	Metabolism;Metabolism;Metabolism	Biosynthesis of other secondary metabolites;Global and overview maps;Chemical structure transformation maps	HMDB0033852	Organoheterocyclic compounds	Quinolines and derivatives	Benzoquinolines	17948-33-3	325.154	5.08975	M+NH4	C19H17NO3	0	36.2	pos
pos_6523	Dimethylarginine	metab_6086	4.37e-05	0.0001064	1.3256	1.3085	1.4064	0.492	yes	-	-	-	-	-	-	-	HMDB0251395	Organic acids and derivatives	Carboxylic acids and derivatives	Amino acids, peptides, and analogues	-	443.25	3.39213	2M+K	C8H18N4O2	0	30.6	pos
pos_4892	3alpha,7alpha,12alpha,24(S)-tetrahydroxy-5beta-cholestan-27-al	metab_4286	1.04e-07	7.25e-07	1.3255	1.3234	0.7118	-0.4906	yes	-	-	-	-	-	-	-	HMDB0062206	Lipids and lipid-like molecules	Steroids and steroid derivatives	Bile acids, alcohols and derivatives	-	468.368	6.13907	M+NH4	C27H46O5	0	48.6	pos
neg_1993	8-Amino-7-oxononanoic acid	metab_8858	7.33e-06	2.78e-05	1.325	1.323	0.6354	-0.6543	yes	C01092	-	-	map01100;map00780;map01240	Metabolic pathways;Biotin metabolism;Biosynthesis of cofactors	Metabolism;Metabolism;Metabolism	Global and overview maps;Metabolism of cofactors and vitamins;Global and overview maps	LMFA01060168;HMDB0240687	Lipids and lipid-like molecules	Fatty Acyls	Fatty acids and conjugates	682799-71-9	232.119	4.06052	M+FA-H	C9H17NO3	0	43.3	neg
neg_6371	5-Hydroxy-N-formylkynurenine	metab_13701	2.39e-06	1.14e-05	1.3244	1.3149	0.6813	-0.5537	yes	C05648	-	-	map01100;map00380	Metabolic pathways;Tryptophan metabolism	Metabolism;Metabolism	Global and overview maps;Amino acid metabolism	PW_C002055;HMDB0004086	Organic oxygen compounds	Organooxygen compounds	Carbonyl compounds	-	251.067	3.8954	M-H	C11H12N2O5	0	51.7	neg
neg_5800	1-Ipomeanol	metab_13071	2.14e-07	1.8e-06	1.3244	1.3157	0.634	-0.6575	yes	-	-	-	-	-	-	-	HMDB0030473	Organoheterocyclic compounds	Heteroaromatic compounds	Not Available	34435-70-6	213.076	4.60472	M+FA-H	C9H12O3	0	39.1	neg
pos_934	9,10-Epoxyoctadecenoic acid	metab_7622	8.33e-06	2.58e-05	1.3242	1.3079	0.714	-0.486	yes	C14825	-	-	map01100;map00591	Metabolic pathways;Linoleic acid metabolism	Metabolism;Metabolism	Global and overview maps;Lipid metabolism	HMDB0004701	Lipids and lipid-like molecules	Fatty Acyls	Fatty acids and conjugates	-	297.242	6.59972	M+H, M+Na	C18H32O3	0	47.1	pos
pos_98	5-Hydroxyindoleacetic acid	metab_7672	1.12e-09	2.86e-08	1.3239	1.318	0.7339	-0.4464	yes	C05635	-	-	map01100;map04726;map00380	Metabolic pathways;Serotonergic synapse;Tryptophan metabolism	Metabolism;Organismal Systems;Metabolism	Global and overview maps;Nervous system;Amino acid metabolism	PW_C000609;HMDB0000763	Organoheterocyclic compounds	Indoles and derivatives	Indolyl carboxylic acids and derivatives	54-16-0	192.065	4.3746	M+H, M+Na, M+H-H2O	C10H9NO3	91.5	0	pos
neg_4536	Cholylcysteine	metab_11670	0.0007184	0.001244	1.3234	1.3079	1.426	0.5119	yes	-	-	-	-	-	-	-	HMDB0242372	Lipids and lipid-like molecules	Steroids and steroid derivatives	Bile acids, alcohols and derivatives	-	492.278	6.31248	M-H2O-H	C27H45NO6S	0	46.9	neg
neg_5803	N-alpha-Acetyl-L-citrulline	metab_13074	6.72e-06	2.6e-05	1.3233	1.3134	1.4111	0.4968	yes	C15532	-	-	map01100;map00220;map01230	Metabolic pathways;Arginine biosynthesis;Biosynthesis of amino acids	Metabolism;Metabolism;Metabolism	Global and overview maps;Amino acid metabolism;Global and overview maps	HMDB0000856	Organic acids and derivatives	Carboxylic acids and derivatives	Amino acids, peptides, and analogues	33965-42-3	493.23	4.59687	2M+Hac-H	C8H15N3O4	0	76.8	neg
pos_7319	Val Glu Ser	metab_6962	0.001886	0.002952	1.3232	1.3245	1.4074	0.493	yes	-	-	-	-	-	-	-	-	-	-	-	-	334.161	1.70157	M+H	C13H23N3O7	85.4	0	pos
pos_7093	Prostratin	metab_6716	2.06e-09	4.4e-08	1.3221	1.3186	1.4504	0.5364	yes	C20197	-	-	-	-	-	-	HMDB0256861	Lipids and lipid-like molecules	Prenol lipids	Diterpenoids	60857-08-1	408.235	2.70018	M+NH4	C22H30O6	0	42.3	pos
pos_5445	Ganoderic acid H	metab_4896	1.06e-08	1.46e-07	1.3215	1.317	1.419	0.5049	yes	-	-	-	-	-	-	-	HMDB0035987	Lipids and lipid-like molecules	Prenol lipids	Triterpenoids	98665-19-1	617.272	5.34577	M+2Na-H	C32H44O9	0	30.8	pos
neg_2538	N-Desmethyl zolmitriptan	metab_9460	0.0002069	0.0004256	1.3209	1.3229	1.6537	0.7257	yes	-	-	-	-	-	-	-	HMDB0255120	Organoheterocyclic compounds	Indoles and derivatives	Tryptamines and derivatives	-	318.146	4.98713	M+FA-H	C15H19N3O2	0	57.9	neg
pos_6332	Cellulose, microcrystalline	metab_5876	1.01e-06	4.5e-06	1.3209	1.3103	0.6784	-0.5597	yes	-	-	-	-	-	-	-	HMDB0032197	Organic oxygen compounds	Organooxygen compounds	Carbohydrates and carbohydrate conjugates	9004-34-6	415.117	3.67295	M+2Na-H	C14H26O11	0	48.8	pos
neg_2840	2-Propenoic acid, 2-methyl-, 7-oxabicyclo[4.1.0]hept-3-ylmethyl ester	metab_9795	3.51e-07	2.61e-06	1.3208	1.3119	0.6902	-0.535	yes	-	-	-	-	-	-	-	HMDB0247495	Organoheterocyclic compounds	Oxepanes	Not Available	-	241.108	5.4947	M+FA-H	C11H16O3	0	32.4	neg
neg_1945	Phenylalanylhistidine	metab_8805	0.0001086	0.000249	1.3207	1.3126	1.4023	0.4878	yes	-	-	-	-	-	-	-	HMDB0028892;HMDB0028997	Organic acids and derivatives	Carboxylic acids and derivatives	Amino acids, peptides, and analogues	16874-81-0;33367-37-2	649.269	3.98935	2M+FA-H	C15H18N4O3	0	75.2	neg
pos_5660	Trp Trp Glu	metab_5130	0.0001577	0.0003273	1.3206	1.3023	1.4508	0.5368	yes	-	-	-	-	-	-	-	-	-	-	-	-	520.219	4.92107	M+H	C27H29N5O6	82.3	0	pos
neg_5498	Vanillylamine	metab_12735	2.93e-09	6.22e-08	1.3205	1.3171	0.6732	-0.571	yes	C16666	-	-	map01100;map01063;map01110;map00998	Metabolic pathways;Biosynthesis of alkaloids derived from shikimate pathway;Biosynthesis of secondary metabolites;Biosynthesis of various secondary metabolites - part 2	Metabolism;Metabolism;Metabolism;Metabolism	Global and overview maps;Chemical structure transformation maps;Global and overview maps;Biosynthesis of other secondary metabolites	HMDB0012309	Benzenoids	Phenols	Methoxyphenols	1196-92-5	351.156	5.07988	2M+FA-H	C8H11NO2	0	31	neg
pos_5915	PA(10:0/20:4(6E,8Z,11Z,14Z)-OH(5S))	metab_5412	6.03e-05	0.00014	1.3196	1.309	1.4096	0.4953	yes	-	-	-	-	-	-	-	HMDB0262649	Not Available	Not Available	Not Available	-	673.34	4.39852	M+2Na-H	C33H57O9P	0	40.6	pos
pos_2411	H-Gly-Arg-Gly-Asp-D-Ser-Pro-OH	metab_1560	3.2e-08	3.14e-07	1.3195	1.3188	1.3842	0.469	yes	-	-	-	-	-	-	-	HMDB0253013	Organic acids and derivatives	Carboxylic acids and derivatives	Amino acids, peptides, and analogues	-	651.283	3.40807	M+ACN+Na	C22H37N9O10	0	48	pos
neg_1455	Sampatrilat	metab_8262	1.27e-06	7.03e-06	1.3193	1.3189	1.4364	0.5224	yes	-	-	-	-	-	-	-	HMDB0257476	Organic acids and derivatives	Peptidomimetics	Hybrid peptides	-	605.225	3.3753	M+Na-2H	C26H40N4O9S	0	80.5	neg
neg_1770	Desciclovir	metab_8611	4.79e-09	9.13e-08	1.3192	1.3122	1.4428	0.5289	yes	-	-	-	-	-	-	-	HMDB0251033	Organoheterocyclic compounds	Imidazopyrimidines	Purines and purine derivatives	-	463.184	3.75317	2M+FA-H	C8H11N5O2	0	55.4	neg
neg_6258	Acetyl-Ser-Asp-Lys-Pro	metab_13575	4.44e-07	3.15e-06	1.3185	1.3069	1.4408	0.5269	yes	-	-	-	-	-	-	-	HMDB0247929	Organic acids and derivatives	Carboxylic acids and derivatives	Amino acids, peptides, and analogues	-	486.221	4.01348	M-H	C20H33N5O9	0	82.5	neg
neg_5971	Cabastine	metab_13259	5.43e-05	0.0001408	1.3183	1.318	1.4618	0.5477	yes	-	-	-	-	-	-	-	HMDB0249522	Organoheterocyclic compounds	Piperidines	Phenylpiperidines	-	401.204	4.36738	M-H2O-H	C26H29FN2O2	0	36.5	neg
pos_3675	20a,22b-Dihydroxycholesterol	metab_2947	2.75e-07	1.53e-06	1.3179	1.3156	0.7076	-0.499	yes	C05501	-	-	map01100;map00140	Metabolic pathways;Steroid hormone biosynthesis	Metabolism;Metabolism	Global and overview maps;Lipid metabolism	HMDB0006763;PW_C002915	Lipids and lipid-like molecules	Steroids and steroid derivatives	Bile acids, alcohols and derivatives	15234-55-6	401.341	6.8541	M+H-H2O	C27H46O3	0	66.4	pos
pos_6774	Lenticin	metab_6362	9.51e-06	2.88e-05	1.3168	1.309	0.7201	-0.4737	yes	C09213	-	-	-	-	-	-	HMDB0061115	Organic acids and derivatives	Carboxylic acids and derivatives	Amino acids, peptides, and analogues	487-58-1	493.281	3.04903	2M+H	C14H18N2O2	0	32.5	pos
pos_3019	2-(9-acetyl-1-oxa-9-azaspiro[5.5]undecan-4-yl)acetic acid	metab_2230	0.01141	0.01511	1.3164	1.2881	0.4847	-1.0448	yes	-	-	-	-	-	-	-	-	-	-	-	-	256.154	5.04175	M+H	C13H21NO4	40.5	0	pos
pos_7385	S-Adenosylmethionine	metab_7035	4.53e-05	0.0001094	1.3162	1.3071	1.3677	0.4518	yes	C00019	Vitamins and cofactors	Cofactors	map01100;map01110;map00908;map00270;map01240;map00330;map01230;map05208;map00261;map04122;map01070;map01060	Metabolic pathways;Biosynthesis of secondary metabolites;Zeatin biosynthesis;Cysteine and methionine metabolism;Biosynthesis of cofactors;Arginine and proline metabolism;Biosynthesis of amino acids;Chemical carcinogenesis - reactive oxygen species;Monobactam biosynthesis;Sulfur relay system;Biosynthesis of plant hormones;Biosynthesis of plant secondary metabolites	Metabolism;Metabolism;Metabolism;Metabolism;Metabolism;Metabolism;Metabolism;Human Diseases;Metabolism;Genetic Information Processing;Metabolism;Metabolism	Global and overview maps;Global and overview maps;Metabolism of terpenoids and polyketides;Amino acid metabolism;Global and overview maps;Amino acid metabolism;Global and overview maps;Cancer: overview;Biosynthesis of other secondary metabolites;Folding, sorting and degradation;Chemical structure transformation maps;Chemical structure transformation maps	HMDB0001185;PW_C000921	Nucleosides, nucleotides, and analogues	5''-deoxyribonucleosides	5''-deoxy-5''-thionucleosides	485-80-3;29908-03-0	364.135	1.26265	M+H-2H2O	C15H23N6O5S+	0	82	pos
pos_928	3-Epiaphidicolin	metab_7615	0.003567	0.005236	1.3155	1.2891	0.5994	-0.7383	yes	-	-	-	-	-	-	-	HMDB0245864	Lipids and lipid-like molecules	Prenol lipids	Diterpenoids	-	361.235	6.56792	M+NH4, M+Na	C20H34O4	0	43.5	pos
neg_2513	2-Methoxy-5-methylaniline	metab_9433	1.99e-07	1.7e-06	1.3155	1.3107	0.7074	-0.4994	yes	C19216	-	-	-	-	-	-	HMDB0245200	Benzenoids	Phenol ethers	Aminophenyl ethers	-	182.082	4.94343	M+FA-H	C8H11NO	0	34.8	neg
pos_3131	Tsangane L 3-glucoside	metab_2355	0.001549	0.002475	1.3152	1.3081	0.561	-0.8341	yes	-	-	-	-	-	-	-	HMDB0040824	Lipids and lipid-like molecules	Prenol lipids	Terpene glycosides	143775-68-2	416.264	5.37043	M+ACN+H	C19H34O7	0	44.2	pos
neg_2499	9-Oxo-nonanoic acid	metab_9416	9.88e-06	3.52e-05	1.315	1.3072	0.6653	-0.5879	yes	C16322	-	-	map00592;map01110	alpha-Linolenic acid metabolism;Biosynthesis of secondary metabolites	Metabolism;Metabolism	Lipid metabolism;Global and overview maps	LMFA01060160;HMDB0094711	Lipids and lipid-like molecules	Fatty Acyls	Fatty acids and conjugates	-	217.108	4.91147	M+FA-H	C9H16O3	0	49	neg
neg_6182	Barnidipine	metab_13494	5.45e-06	2.19e-05	1.315	1.315	0.6813	-0.5536	yes	-	-	-	-	-	-	-	HMDB0248875	Organoheterocyclic compounds	Pyridines and derivatives	Hydropyridines	-	536.207	4.09187	M+FA-H	C27H29N3O6	0	61.1	neg
pos_2117	Pro Pro Glu	metab_1237	1.16e-06	4.98e-06	1.3149	1.3153	1.3491	0.432	yes	-	-	-	-	-	-	-	-	-	-	-	-	342.166	2.79575	M+H	C15H23N3O6	34	0	pos
pos_2829	Desaminotyrosine	metab_2019	5.94e-08	4.85e-07	1.3148	1.3116	0.7428	-0.4289	yes	C01744	-	-	-	-	-	-	HMDB0002199	Phenylpropanoids and polyketides	Phenylpropanoic acids	Not Available	501-97-3	184.097	4.43918	M+NH4	C9H10O3	0	56.3	pos
pos_5898	postin	metab_5392	6.62e-09	1.05e-07	1.3147	1.3106	1.4359	0.522	yes	-	-	-	-	-	-	-	HMDB0005772	Organic acids and derivatives	Carboxylic acids and derivatives	Amino acids, peptides, and analogues	103745-46-6	560.329	4.42252	M+ACN+Na	C22H40N8O5	0	30.4	pos
pos_6433	Epidermin	metab_5988	7.54e-06	2.37e-05	1.3146	1.317	1.4394	0.5255	yes	-	-	-	-	-	-	-	HMDB0034777	Organic oxygen compounds	Organooxygen compounds	Carbohydrates and carbohydrate conjugates	126050-09-7	325.139	3.52862	M+ACN+Na	C11H19NO6	0	33.5	pos
neg_6959	Acrylamide-sodium acrylate resin	metab_14351	1.68e-06	8.74e-06	1.3138	1.3162	0.6513	-0.6187	yes	-	-	-	-	-	-	-	HMDB0303186	Lipids and lipid-like molecules	Fatty Acyls	Fatty acids and conjugates	-	218.103	3.31982	M+FA-H	C8H15NO3	0	44.6	neg
neg_1423	4-Methyl-1,4-dihydropyridine-3,5-dicarbaldehyde	metab_8227	2.31e-07	1.9e-06	1.3137	1.3051	0.6622	-0.5947	yes	-	-	-	-	-	-	-	HMDB0254370	Organoheterocyclic compounds	Pyridines and derivatives	Hydropyridines	-	150.055	3.34393	M-H	C8H9NO2	0	31	neg
pos_5816	L-Hexanoylcarnitine	metab_5302	1.2e-05	3.48e-05	1.3128	1.3049	1.4727	0.5584	yes	-	-	-	-	-	-	-	HMDB0000756	Lipids and lipid-like molecules	Fatty Acyls	Fatty acid esters	22671-29-0	260.186	4.59172	M+H	C13H25NO4	62.5	0	pos
neg_4509	(E)-3-nonenal	metab_11640	0.0004491	0.0008158	1.3128	1.3038	0.6872	-0.5411	yes	-	-	-	-	-	-	-	HMDB0303858	Organic oxygen compounds	Organooxygen compounds	Carbonyl compounds	-	279.233	6.35145	2M-H	C9H16O	0	62.9	neg
pos_6390	3-Methylsuberic acid	metab_5940	8.04e-06	2.5e-05	1.3126	1.3037	0.6374	-0.6498	yes	-	-	-	-	-	-	-	HMDB0059783;LMFA01030981	Lipids and lipid-like molecules	Fatty Acyls	Fatty acids and conjugates	-	171.102	3.60122	M+H-H2O	C9H16O4	0	46.8	pos
neg_2175	16alpha-hydroxyprednisolone	metab_9060	3.15e-10	1.23e-08	1.3108	1.3074	1.4624	0.5483	yes	-	-	-	-	-	-	-	HMDB0244573	Lipids and lipid-like molecules	Steroids and steroid derivatives	Hydroxysteroids	-	421.183	4.32042	M+FA-H	C21H28O6	0	76.4	neg
pos_5195	Trandolaprilat	metab_4620	5.27e-06	1.76e-05	1.3108	1.3014	0.7165	-0.4809	yes	C21515	-	-	-	-	-	-	HMDB0247506;PW_C040469;HMDB0060583	Organic acids and derivatives	Carboxylic acids and derivatives	Amino acids, peptides, and analogues	-	466.233	5.8758	M+ACN+Na	C22H30N2O5	0	44.1	pos
neg_5298	Caffeyl Alcohol	metab_12513	2.3e-05	7.03e-05	1.3106	1.3171	0.6219	-0.6852	yes	C12206	-	-	map01110;map00940	Biosynthesis of secondary metabolites;Phenylpropanoid biosynthesis	Metabolism;Metabolism	Global and overview maps;Biosynthesis of other secondary metabolites	-	-	-	-	-	211.061	5.36485	M+FA-H	C9H10O3	51	0	neg
pos_5411	Parthenolide	metab_4859	6.21e-06	2.01e-05	1.3097	1.3003	0.6638	-0.5912	yes	C07609	-	-	-	-	-	-	LMPR0103090002	-	-	-	20554-84-1	249.148	5.42647	M+H	C15H20O3	65.6	0	pos
neg_6355	Lysyl-aspartyl-glutamyl-leucine	metab_13683	1.19e-06	6.66e-06	1.3096	1.2986	1.4288	0.5148	yes	-	-	-	-	-	-	-	HMDB0247848	Organic acids and derivatives	Carboxylic acids and derivatives	Amino acids, peptides, and analogues	-	502.252	3.90323	M-H	C21H37N5O9	0	54.6	neg
pos_2121	Gln Lys Glu	metab_1242	3.81e-05	9.46e-05	1.3096	1.3096	1.4066	0.4923	yes	-	-	-	-	-	-	-	-	-	-	-	-	404.214	2.79575	M+H	C16H29N5O7	57.8	0	pos
neg_6305	2,8-Quinolinediol	metab_13628	7.67e-09	1.31e-07	1.3082	1.3027	0.6472	-0.6277	yes	C06342	-	-	-	-	-	-	HMDB0240311	Organoheterocyclic compounds	Quinolines and derivatives	Quinolones and derivatives	15450-76-7	206.045	3.96585	M+FA-H	C9H7NO2	0	75.5	neg
pos_2414	Ser Glu Ile Glu	metab_1563	0.0006467	0.001142	1.3073	1.304	1.3937	0.4789	yes	-	-	-	-	-	-	-	-	-	-	-	-	477.219	3.42407	M+H	C19H32N4O10	44.3	0	pos
pos_6493	Dihydroxylysinonorleucine	metab_6054	0.02709	0.03356	1.3072	1.3279	1.9953	0.9966	yes	-	-	-	-	-	-	-	HMDB0251345	Organic acids and derivatives	Carboxylic acids and derivatives	Amino acids, peptides, and analogues	-	416.25	3.4401	M+H-2H2O	C18H37N5O8	0	59.8	pos
pos_2480	Leu Leu Glu	metab_1636	4.21e-05	0.000103	1.3067	1.299	1.4167	0.5025	yes	-	-	-	-	-	-	-	-	-	-	-	-	374.228	3.5766	M+H	C17H31N3O6	48.2	0	pos
neg_6007	9-Carboxymethoxymethylguanine	metab_13300	1.07e-05	3.77e-05	1.3061	1.307	0.6599	-0.5997	yes	-	-	-	-	-	-	-	HMDB0060805	Organoheterocyclic compounds	Imidazopyrimidines	Purines and purine derivatives	-	274.033	4.32042	M+Cl	C8H9N5O4	0	44.8	neg
neg_6814	Lipoamide	metab_14191	8.71e-07	5.29e-06	1.3058	1.3011	0.659	-0.6017	yes	C00248	-	-	-	-	-	-	HMDB0000962;LMFA08010006;HMDB0304823;PW_C000769	Organoheterocyclic compounds	Dithiolanes	Lipoamides	940-69-2	186.04	3.43858	M-H2O-H	C8H15NOS2	0	44.3	neg
pos_5946	Muramic acid	metab_5446	4.83e-06	1.63e-05	1.3056	1.3051	1.6808	0.7491	yes	C06470	Carbohydrates	Monosaccharides	-	-	-	-	HMDB0003254;HMDB0248237	Organic oxygen compounds	Organooxygen compounds	Carbohydrates and carbohydrate conjugates	1114-41-6	274.092	4.34202	M+Na	C9H17NO7	0	67	pos
pos_3423	Tyr-ile-gly-ser-arg	metab_2674	1.33e-06	5.52e-06	1.3054	1.3044	0.717	-0.48	yes	-	-	-	-	-	-	-	HMDB0259343	Organic acids and derivatives	Carboxylic acids and derivatives	Amino acids, peptides, and analogues	-	639.284	6.1152	M+2Na-H	C26H42N8O8	0	46.4	pos
pos_657	Puromycin	metab_6137	0.005378	0.007603	1.3054	1.321	1.4951	0.5802	yes	C01610	-	-	map01100;map01110;map00998	Metabolic pathways;Biosynthesis of secondary metabolites;Biosynthesis of various secondary metabolites - part 2	Metabolism;Metabolism;Metabolism	Global and overview maps;Global and overview maps;Biosynthesis of other secondary metabolites	HMDB0256926	Nucleosides, nucleotides, and analogues	Purine nucleosides	Purine 3''-deoxyribonucleosides	53-79-2	489.256	4.21332	M+H-2H2O, M+NH4	C22H29N7O5	0	44.5	pos
neg_2193	VAPIPROST	metab_9080	1.64e-07	1.49e-06	1.3053	1.2959	1.4329	0.519	yes	-	-	-	-	-	-	-	HMDB0259765	Benzenoids	Benzene and substituted derivatives	Biphenyls and derivatives	-	498.258	4.35957	M+Na-2H	C30H39NO4	0	55.1	neg
neg_5816	Kiwiionoside	metab_13088	1.13e-05	3.95e-05	1.3051	1.3069	1.4949	0.5801	yes	-	-	-	-	-	-	-	HMDB0038691	Lipids and lipid-like molecules	Prenol lipids	Terpene glycosides	141897-12-3	441.188	4.58265	M+Cl	C19H34O9	0	69.5	neg
pos_4986	(11S,12S,13S)-Epoxy-hydroxyoctadeca-cis-9-cis-15-dien-1-oic acid	metab_4390	0.0001213	0.0002611	1.3051	1.2863	0.6897	-0.536	yes	-	-	-	-	-	-	-	HMDB0302825	Lipids and lipid-like molecules	Fatty Acyls	Fatty acids and conjugates	-	328.248	6.07533	M+NH4	C18H30O4	0	60.7	pos
neg_3437	PE(20:3/0:0)	metab_10454	1.01e-05	3.6e-05	1.3046	1.296	1.3599	0.4435	yes	-	-	-	-	-	-	-	-	-	-	-	-	502.294	6.50763	M-H	C25H46NO7P	94.9	0	neg
pos_2771	Calonectrin	metab_1956	7.16e-06	2.27e-05	1.3041	1.297	0.6745	-0.5681	yes	-	-	-	-	-	-	-	HMDB0034915	Lipids and lipid-like molecules	Prenol lipids	Sesquiterpenoids	-	389.137	4.29402	M+K	C19H26O6	0	41.8	pos
neg_6854	1-Hydroxypyrene glucuronide	metab_14235	4.87e-07	3.38e-06	1.3038	1.2975	0.6895	-0.5363	yes	-	-	-	-	-	-	-	HMDB0059759	Benzenoids	Pyrenes	Not Available	-	415.081	3.3988	M+Na-2H	C22H18O7	0	39.5	neg
neg_6116	Alanylproline	metab_13421	0.001158	0.001906	1.3033	1.3158	1.4785	0.5641	yes	-	-	-	-	-	-	-	HMDB0028695	Organic acids and derivatives	Carboxylic acids and derivatives	Amino acids, peptides, and analogues	13485-59-1	371.193	4.17083	2M-H	C8H14N2O3	0	43.5	neg
neg_5319	1,3-Bis(hydroxymethyl)-3-methylbicyclo[2.2.1]heptan-2-one	metab_12537	1.22e-05	4.23e-05	1.3028	1.2936	0.6679	-0.5823	yes	-	-	-	-	-	-	-	HMDB0303357	Lipids and lipid-like molecules	Prenol lipids	Monoterpenoids	-	229.108	5.33688	M+FA-H	C10H16O3	0	67	neg
pos_4569	Ponasterone A	metab_3932	7.77e-07	3.6e-06	1.3025	1.295	0.7625	-0.3912	yes	C08835	-	-	-	-	-	-	HMDB0256697;LMST01010195	Lipids and lipid-like molecules	Steroids and steroid derivatives	Bile acids, alcohols and derivatives	13408-56-5	447.308	6.5361	M+H-H2O	C27H44O6	0	63	pos
neg_3652	LysoPE(0:0/20:0)	metab_10692	4.18e-10	1.48e-08	1.3024	1.2993	1.3713	0.4555	yes	-	-	-	-	-	-	-	HMDB0011481	Lipids and lipid-like molecules	Glycerophospholipids	Glycerophosphoethanolamines	-	554.346	7.10098	M+FA-H	C25H52NO7P	0	42	neg
neg_172	4'-Hydroxy-R-phenprocoumon	metab_8555	0.0003653	0.0006826	1.3022	1.3102	1.37	0.4541	yes	-	-	-	-	-	-	-	HMDB0060885	Phenylpropanoids and polyketides	Coumarins and derivatives	Hydroxycoumarins	-	277.086	1.80027	M-H2O-H, M-H	C18H16O4	0	49.5	neg
neg_6569	Glu Asp Lys Glu	metab_13919	9.78e-10	2.59e-08	1.3016	1.2977	1.4517	0.5378	yes	-	-	-	-	-	-	-	-	-	-	-	-	518.21	3.67417	M-H	C20H33N5O11	52.8	0	neg
pos_33	2-Lysophosphatidylcholine	metab_2538	1.28e-06	5.36e-06	1.3016	1.3029	1.2335	0.3027	yes	C04230	Lipids	Phospholipids	map00564;map05231	Glycerophospholipid metabolism;Choline metabolism in cancer	Metabolism;Human Diseases	Lipid metabolism;Cancer: overview	HMDB0258493	Lipids and lipid-like molecules	Glycerophospholipids	Glycerophosphocholines	-	524.371	7.72757	M+H, M+K, M+2Na-H, M+H-H2O	C26H54NO7P	0	84.2	pos
pos_3575	Fusidic Acid	metab_7719	6.82e-06	2.18e-05	1.3004	1.2977	0.7672	-0.3824	yes	C06694	Antibiotics	Others	-	-	-	-	HMDB0015570;HMDB0001933;MJDBOTE0000983	Lipids and lipid-like molecules	Steroids and steroid derivatives	Steroid esters	54-31-9;6990-06-3	517.349	6.54405	M+H	C31H48O6	0	46.6	pos
neg_6074	Gibberellins	metab_13374	5e-08	5.61e-07	1.3003	1.2941	0.7438	-0.4271	yes	C01699	-	-	map01110;map00904	Biosynthesis of secondary metabolites;Diterpenoid biosynthesis	Metabolism;Metabolism	Global and overview maps;Metabolism of terpenoids and polyketides	HMDB0003559;HMDB0252716	Lipids and lipid-like molecules	Prenol lipids	Diterpenoids	1977-06-05	383.092	4.21782	M+K-2H	C19H22O6	0	37	neg
pos_5207	P-Octopamine	metab_4633	8.61e-08	6.3e-07	1.2993	1.2928	0.7071	-0.5001	yes	C04227	-	-	map04080	Neuroactive ligand-receptor interaction	Environmental Information Processing	Signaling molecules and interaction	HMDB0004825	Benzenoids	Phenols	1-hydroxy-2-unsubstituted benzenoids	104-14-3	307.165	5.85188	2M+H	C8H11NO2	0	42.3	pos
pos_3223	N-Eicosapentaenoyl Methionine	metab_2456	2.19e-07	1.28e-06	1.2993	1.2896	0.7085	-0.4972	yes	-	-	-	-	-	-	-	HMDB0242076	Not Available	Not Available	Not Available	-	416.264	5.67548	M+H-H2O	C25H39NO3S	0	60.1	pos
pos_7490	Cytidine	metab_7148	0.0004168	0.0007733	1.2982	1.3043	1.4073	0.4929	yes	C00475	Nucleic acids	Nucleosides	map00240;map01100;map02010	Pyrimidine metabolism;Metabolic pathways;ABC transporters	Metabolism;Metabolism;Environmental Information Processing	Nucleotide metabolism;Global and overview maps;Membrane transport	PW_C000061;HMDB0000089;HMDB0248553;MJDBOTE0000789	Nucleosides, nucleotides, and analogues	Pyrimidine nucleosides	Not Available	65-46-3	285.119	0.914333	M+ACN+H	C9H13N3O5	0	50.8	pos
pos_2911	5-Deoxymyricanone	metab_2110	6.96e-09	1.09e-07	1.2958	1.2912	0.7349	-0.4444	yes	-	-	-	-	-	-	-	HMDB0030799	Phenylpropanoids and polyketides	Diarylheptanoids	Cyclic diarylheptanoids	110007-10-8	363.155	4.70437	M+Na	C21H24O4	0	53.7	pos
neg_5572	Hydromorphone-3-sulphate	metab_12818	0.0002894	0.0005601	1.2956	1.2978	1.5313	0.6148	yes	-	-	-	-	-	-	-	HMDB0060825	Alkaloids and derivatives	Morphinans	Not Available	-	364.086	4.96698	M-H	C17H19NO6S	0	43.1	neg
neg_6967	Cinncassiol C2	metab_14360	5.28e-08	5.83e-07	1.2954	1.2958	1.4186	0.5045	yes	C17642	-	-	-	-	-	-	HMDB0035168	Lipids and lipid-like molecules	Prenol lipids	Sesquiterpenoids	73599-14-1	773.38	3.30417	2M+FA-H	C20H28O6	0	74.7	neg
neg_1978	N-[(3a,5b,7a,12a)-3,12-dihydroxy-24-oxo-7-(sulfooxy)cholan-24-yl]-Glycine	metab_8841	0.0004121	0.0007561	1.2951	1.3011	1.4466	0.5327	yes	-	-	-	-	-	-	-	HMDB0002640	Lipids and lipid-like molecules	Steroids and steroid derivatives	Bile acids, alcohols and derivatives	71977-73-6	544.262	4.037	M-H	C26H43NO9S	0	76.6	neg
pos_7211	4-Acetamido-2-aminobutanoic acid	metab_6847	0.0001752	0.0003592	1.2943	1.2824	1.3745	0.4589	yes	C06442	-	-	map01100;map01120;map00260	Metabolic pathways;Microbial metabolism in diverse environments;Glycine, serine and threonine metabolism	Metabolism;Metabolism;Metabolism	Global and overview maps;Global and overview maps;Amino acid metabolism	HMDB0031411	Organic acids and derivatives	Carboxylic acids and derivatives	Amino acids, peptides, and analogues	1190-46-1	384.188	2.41247	2M+ACN+Na	C6H12N2O3	0	41.4	pos
pos_390	7,8-diaminopelargonate	metab_3193	5.95e-05	0.0001386	1.2942	1.2891	0.78	-0.3585	yes	C01037	-	-	map01100;map00780;map01240	Metabolic pathways;Biotin metabolism;Biosynthesis of cofactors	Metabolism;Metabolism;Metabolism	Global and overview maps;Metabolism of cofactors and vitamins;Global and overview maps	HMDB0304236	Lipids and lipid-like molecules	Fatty Acyls	Fatty acids and conjugates	-	230.186	1.85303	M+H-H2O, M+ACN+H	C9H20N2O2	0	38.6	pos
pos_4959	Contignasterol	metab_4360	2.58e-06	9.66e-06	1.2937	1.2945	0.7376	-0.4391	yes	C19902	-	-	-	-	-	-	HMDB0250439	Lipids and lipid-like molecules	Prenol lipids	Triterpenoids	137571-30-3	491.336	6.08332	M+H-H2O	C29H48O7	0	74.3	pos
pos_5892	2,2-Dimethyl-5-hydroxy-1-pyrrolidinyloxy	metab_5386	2.13e-06	8.23e-06	1.2935	1.2929	0.6167	-0.6974	yes	-	-	-	-	-	-	-	HMDB0247851	Organoheterocyclic compounds	Pyrrolidines	Not Available	-	96.0813	4.43918	M+H-2H2O	C6H13NO2	0	64.7	pos
neg_1848	Ethyl-4-hydroxymethyl-3(2H)-Furanone	metab_8697	1.29e-06	7.07e-06	1.2933	1.284	0.6694	-0.579	yes	-	-	-	-	-	-	-	-	-	-	-	-	187.061	3.86412	M+FA-H	C7H10O3	0	36	neg
neg_2980	Erythromycin C	metab_15374	1.21e-06	6.74e-06	1.2927	1.294	1.3798	0.4644	yes	C01912	Antibiotics	Polyketides and nonribosomal peptides	map01052;map01100;map00522;map01110	Type I polyketide structures;Metabolic pathways;Biosynthesis of 12-, 14- and 16-membered macrolides;Biosynthesis of secondary metabolites	Metabolism;Metabolism;Metabolism;Metabolism	Metabolism of terpenoids and polyketides;Global and overview maps;Metabolism of terpenoids and polyketides;Global and overview maps	LMPK04000009;HMDB0014344;HMDB0251935	Organic oxygen compounds	Organooxygen compounds	Carbohydrates and carbohydrate conjugates	114-07-8	756.395	5.77787	M+K-2H	C36H65NO13	0	66.3	neg
neg_4311	1-(11Z,14Z-eicosadienoyl)-glycero-3-phosphate	metab_11421	1e-07	9.92e-07	1.2919	1.2961	1.272	0.347	yes	-	-	-	-	-	-	-	HMDB0062303;LMGP10050027;HMDB0114758	Lipids and lipid-like molecules	Glycerophospholipids	Glycerophosphates	-	507.273	6.60933	M+FA-H	C23H43O7P	0	54.9	neg
neg_5073	Chenodeoxycholylmethionine	metab_12265	6.83e-08	7.15e-07	1.2918	1.2861	1.4027	0.4882	yes	-	-	-	-	-	-	-	HMDB0242403	Lipids and lipid-like molecules	Steroids and steroid derivatives	Bile acids, alcohols and derivatives	-	568.335	5.7088	M+FA-H	C29H49NO5S	0	67.8	neg
neg_2453	Gly Leu Phe	metab_9366	7.11e-09	1.24e-07	1.2906	1.2896	1.4505	0.5365	yes	-	-	-	-	-	-	-	-	-	-	-	-	334.177	4.8257	M-H	C17H25N3O4	68.6	0	neg
neg_6314	Alectrol	metab_13638	1.82e-07	1.61e-06	1.2905	1.2818	0.7379	-0.4385	yes	C09059	-	-	-	-	-	-	HMDB0041372	Organoheterocyclic compounds	Lactones	Gamma butyrolactones	143572-84-3	383.092	3.95018	M+K-2H	C19H22O6	0	59.5	neg
neg_467	N-Linoleoyl Phenylalanine	metab_11817	3.42e-06	1.52e-05	1.2901	1.2852	1.3	0.3785	yes	-	-	-	-	-	-	-	HMDB0241982	Organic acids and derivatives	Carboxylic acids and derivatives	Amino acids, peptides, and analogues	-	426.301	6.6328	M-H, M+Cl	C27H41NO3	0	62.4	neg
pos_7258	Pro Glu Ala	metab_6895	4.39e-05	0.0001067	1.2899	1.2956	1.4048	0.4904	yes	-	-	-	-	-	-	-	-	-	-	-	-	316.15	1.86097	M+H	C13H21N3O6	75.9	0	pos
neg_4608	Cholylisoleucine	metab_11750	0.001877	0.002929	1.2896	1.2956	1.4283	0.5143	yes	-	-	-	-	-	-	-	HMDB0242373	Not Available	Not Available	Not Available	-	520.364	6.20382	M-H	C30H51NO6	0	50.8	neg
neg_5107	Butanedioic acid, octenyl-	metab_12303	9.78e-05	0.0002277	1.2896	1.2734	0.6628	-0.5933	yes	-	-	-	-	-	-	-	HMDB0249455	Lipids and lipid-like molecules	Fatty Acyls	Fatty acid esters	-	273.134	5.66178	M+FA-H	C12H20O4	0	53.5	neg
pos_1500	Dihydroetorphine	metab_557	0.0002474	0.0004859	1.2882	1.2878	1.4127	0.4984	yes	-	-	-	-	-	-	-	HMDB0251313	Benzenoids	Phenanthrenes and derivatives	Not Available	-	458.224	3.0331	M+H, M+2Na-H	C25H35NO4	0	30.3	pos
neg_6045	Isoferulic acid 3-sulfate	metab_13342	4.93e-05	0.0001305	1.288	1.2972	1.4308	0.5168	yes	-	-	-	-	-	-	-	HMDB0041748	Phenylpropanoids and polyketides	Cinnamic acids and derivatives	Hydroxycinnamic acids and derivatives	-	273.008	4.25702	M-H	C10H10O7S	0	43.4	neg
neg_1927	Sinomenine	metab_8785	1.61e-08	2.3e-07	1.2876	1.2798	1.3864	0.4713	yes	C09643	-	-	-	-	-	-	HMDB0258305;MJDBOTE0001482	Alkaloids and derivatives	Morphinans	Not Available	115-53-7	350.136	3.96585	M+Na-2H	C19H23NO4	0	37.9	neg
neg_5185	Tetradecanedioic acid	metab_12389	2.94e-05	8.65e-05	1.2876	1.2781	0.6954	-0.524	yes	C11002	-	-	-	-	-	-	HMDB0000872;LMFA01170018	Lipids and lipid-like molecules	Fatty Acyls	Fatty acids and conjugates	821-38-5	303.181	5.5417	M+FA-H	C14H26O4	0	46.8	neg
neg_5984	Cytidine, 2'-deoxy-2',2'-difluoro-N-(1-oxo-2-propylpentyl)-	metab_13273	0.01643	0.02088	1.2869	1.3017	1.6441	0.7173	yes	-	-	-	-	-	-	-	HMDB0254250	Organoheterocyclic compounds	Diazines	Pyrimidines and pyrimidine derivatives	-	388.173	4.35173	M-H	C17H25F2N3O5	0	44.7	neg
neg_2360	Adomeglivant	metab_9265	1.34e-08	2e-07	1.2868	1.2825	1.4355	0.5216	yes	-	-	-	-	-	-	-	HMDB0248020	Benzenoids	Benzene and substituted derivatives	Biphenyls and derivatives	-	576.234	4.63315	M+Na-2H	C32H36F3NO4	0	40.3	neg
neg_6705	2-((5-(Diethylamino)-[1,2,4]triazolo[1,5-a]pyrimidin-7-yl)(hexyl)amino)ethanol	metab_14071	0.002579	0.003907	1.2862	1.2953	1.4837	0.5692	yes	-	-	-	-	-	-	-	HMDB0244283	Organoheterocyclic compounds	Triazolopyrimidines	Not Available	-	371.194	3.54097	M+K-2H	C17H30N6O	0	31.1	neg
neg_6399	Batatasin IV	metab_13731	0.001614	0.002557	1.286	1.2792	1.5106	0.5951	yes	C10247	-	-	-	-	-	-	LMPK13090032;HMDB0032641	Phenylpropanoids and polyketides	Stilbenes	Not Available	60347-67-3	487.217	3.86412	2M-H	C15H16O3	0	35.1	neg
pos_750	4-(2-Aminoethyl)cyclohexa-3,5-diene-1,2-diol	metab_7159	2.97e-11	2.25e-09	1.2856	1.2803	0.7337	-0.4468	yes	-	-	-	-	-	-	-	HMDB0257596	Organic oxygen compounds	Organooxygen compounds	Alcohols and polyols	-	352.223	5.15375	M+H-H2O, 2M+ACN+H	C8H13NO2	0	34.7	pos
pos_2770	Minoxidil Glucuronide	metab_1955	1.31e-06	5.47e-06	1.2851	1.2749	0.6861	-0.5435	yes	-	-	-	-	-	-	-	HMDB0254740	Organic oxygen compounds	Organooxygen compounds	Carbohydrates and carbohydrate conjugates	-	350.146	4.29402	M+H-2H2O	C15H23N5O7	0	68	pos
neg_5783	N-(4-Amino-2,5-diethoxyphenyl)benzamide	metab_13051	0.0001572	0.0003373	1.2849	1.2687	0.683	-0.5501	yes	-	-	-	-	-	-	-	HMDB0244456	Benzenoids	Benzene and substituted derivatives	Anilides	-	345.149	4.6258	M+FA-H	C17H20N2O3	0	34.3	neg
neg_2411	DHAP(10:0)	metab_9320	0.01067	0.01402	1.2848	1.2659	1.6613	0.7323	yes	-	-	-	-	-	-	-	HMDB0011675	Organic oxygen compounds	Organooxygen compounds	Carbonyl compounds	-	323.128	4.74325	M-H	C13H25O7P	0	44.6	neg
pos_2356	(+)-Isofebrifugine	metab_1499	1.56e-06	6.33e-06	1.2835	1.2766	0.743	-0.4285	yes	-	-	-	-	-	-	-	HMDB0242253	Organoheterocyclic compounds	Diazanaphthalenes	Benzodiazines	-	334.176	3.27318	M+CH3OH+H	C16H19N3O3	0	32.8	pos
neg_3061	Menthyl ethylene glycol carbonate	metab_10039	2.14e-05	6.62e-05	1.2823	1.2692	0.718	-0.4779	yes	-	-	-	-	-	-	-	HMDB0036141	Lipids and lipid-like molecules	Prenol lipids	Monoterpenoids	156324-78-6	289.166	5.89217	M+FA-H	C13H24O4	0	40.5	neg
neg_3476	Gymnodimine	metab_10496	3.8e-06	1.65e-05	1.2813	1.2795	0.7738	-0.3699	yes	C20025	-	-	-	-	-	-	HMDB0041430	Organoheterocyclic compounds	Pyridines and derivatives	Hydropyridines	173792-58-0	552.336	6.57805	M+FA-H	C32H45NO4	0	64.2	neg
neg_1381	{4-[4-(6-Carbamoyl-3,5-dimethylpyrazin-2-yl)phenyl]cyclohexyl}acetic acid	metab_8180	0.000133	0.0002935	1.2805	1.2684	1.4521	0.5382	yes	-	-	-	-	-	-	-	HMDB0248788	Organoheterocyclic compounds	Diazines	Pyrazines	-	402.163	3.29633	M+Cl	C21H25N3O3	0	51.7	neg
neg_6192	MPPa (Methyl pyropheophorbide-a)	metab_13504	5.75e-08	6.21e-07	1.2804	1.272	1.4139	0.4996	yes	-	-	-	-	-	-	-	HMDB0254917	Not Available	Not Available	Not Available	-	529.263	4.08403	M-H2O-H	C34H36N4O3	0	59.6	neg
pos_3987	E-10-Hydroxynortriptyline	metab_3288	0.0001923	0.0003901	1.28	1.2769	1.4011	0.4865	yes	-	-	-	-	-	-	-	HMDB0013889	Benzenoids	Dibenzocycloheptenes	Not Available	-	597.287	7.81532	2M+K	C19H21NO	0	61.7	pos
neg_6566	2-Methoxyacetaminophen sulfate	metab_13916	0.0001822	0.000381	1.28	1.2898	1.4882	0.5735	yes	-	-	-	-	-	-	-	HMDB0062550	Organic acids and derivatives	Organic sulfuric acids and derivatives	Arylsulfates	53446-13-2	242.013	3.68263	M-H2O-H	C9H11NO6S	0	38.6	neg
pos_4491	LysoPE(15:0/0:0)	metab_3846	3.32e-07	1.79e-06	1.2796	1.2712	0.7863	-0.3469	yes	-	-	-	-	-	-	-	HMDB0011502	Lipids and lipid-like molecules	Glycerophospholipids	Glycerophosphoethanolamines	-	440.277	6.6394	M+H	C20H42NO7P	89.5	0	pos
neg_480	DG(18:4(6Z,9Z,12Z,15Z)/15:0/0:0)	metab_11962	0.0001021	0.0002365	1.2795	1.2665	0.7463	-0.4221	yes	C00165	-	-	map05214;map05167;map04650;map05163;map04750;map05235;map04015;map04014;map04659;map04540;map04010;map04012;map05022;map04370;map04371;map04072;map04071;map04975;map05143;map05012;map05231;map05146;map04919;map05200;map04961;map04745;map04921;map04920;map04923;map04925;map05017;map04625;map04929;map04726;map04725;map04724;map04723;map04722;map05223;map04720;map04666;map05170;map04664;map04658;map…	Glioma;Kaposi sarcoma-associated herpesvirus infection;Natural killer cell mediated cytotoxicity;Human cytomegalovirus infection;Inflammatory mediator regulation of TRP channels;PD-L1 expression and PD-1 checkpoint pathway in cancer;Rap1 signaling pathway;Ras signaling pathway;Th17 cell differentiation;Gap junction;MAPK signaling pathway;ErbB signaling pathway;Pathways of neurodegeneration - mult…	Human Diseases;Human Diseases;Organismal Systems;Human Diseases;Organismal Systems;Human Diseases;Environmental Information Processing;Environmental Information Processing;Organismal Systems;Cellular Processes;Environmental Information Processing;Environmental Information Processing;Human Diseases;Environmental Information Processing;Environmental Information Processing;Environmental Information …	Cancer: specific types;Infectious disease: viral;Immune system;Infectious disease: viral;Sensory system;Cancer: overview;Signal transduction;Signal transduction;Immune system;Cellular community - eukaryotes;Signal transduction;Signal transduction;Neurodegenerative disease;Signal transduction;Signal transduction;Signal transduction;Signal transduction;Digestive system;Infectious disease: parasitic…	PW_C003380;HMDB0007329	Lipids and lipid-like molecules	Fatty Acyls	Lineolic acids and derivatives	-	573.452	6.81252	M-H, M+Na-2H	C36H62O5	0	33	neg
pos_2720	(6S,8Z)-6-Hydroxy-3-oxotetradecenoic acid	metab_1900	0.0009313	0.001576	1.2783	1.2673	0.5744	-0.7998	yes	-	-	-	-	-	-	-	HMDB0062364	Lipids and lipid-like molecules	Fatty Acyls	Fatty acids and conjugates	-	274.201	4.14067	M+NH4	C14H24O4	0	42.3	pos
pos_7273	Serylmethionine	metab_6911	8.1e-05	0.0001821	1.2783	1.2753	1.3762	0.4607	yes	-	-	-	-	-	-	-	HMDB0029045	Organic acids and derivatives	Carboxylic acids and derivatives	Amino acids, peptides, and analogues	3227-09-06	237.09	1.82128	M+H	C8H16N2O4S	0	64.4	pos
pos_5402	Fluvoxamine	metab_4849	2.98e-06	1.09e-05	1.2773	1.2766	0.6723	-0.5729	yes	C07571	-	-	-	-	-	-	HMDB0014322	Benzenoids	Benzene and substituted derivatives	Trifluoromethylbenzenes	54739-18-3	351.191	5.44247	M+CH3OH+H	C15H21F3N2O2	46.3	0	pos
neg_5152	4-Hydroxyphenyl-2-propionic acid	metab_12353	9e-06	3.28e-05	1.2769	1.2672	0.6436	-0.6357	yes	C03080	-	-	-	-	-	-	HMDB0041683	Phenylpropanoids and polyketides	Phenylpropanoic acids	Not Available	938-96-5	211.061	5.60102	M+FA-H	C9H10O3	0	37.8	neg
pos_6042	Blumenol C O-[apiosyl-(1->6)-glucoside]	metab_5554	2.93e-05	7.52e-05	1.2768	1.2617	1.4106	0.4963	yes	-	-	-	-	-	-	-	HMDB0031936	Lipids and lipid-like molecules	Fatty Acyls	Fatty acyl glycosides	177261-68-6	522.292	4.14067	M+NH4	C24H40O11	0	45.1	pos
neg_5113	Niraxostat	metab_12310	2.29e-07	1.9e-06	1.2761	1.2722	0.6992	-0.5162	yes	-	-	-	-	-	-	-	HMDB0255624	Organoheterocyclic compounds	Azoles	Pyrazoles	-	344.125	5.65393	M+FA-H	C16H17N3O3	0	35	neg
pos_7469	L-2-Aminobutyric acid	metab_7732	1.1e-05	3.26e-05	1.2756	1.2639	0.7334	-0.4473	yes	C02356	-	-	map01100;map00270	Metabolic pathways;Cysteine and methionine metabolism	Metabolism;Metabolism	Global and overview maps;Amino acid metabolism	HMDB0245013;HMDB0000650;HMDB0000452	Organic acids and derivatives	Carboxylic acids and derivatives	Amino acids, peptides, and analogues	1492-24-6;2623-91-8	104.071	0.945833	M+H	C4H9NO2	70	0	pos
pos_4078	PC(16:0/0:0)	metab_3390	3.34e-07	1.8e-06	1.2752	1.2719	1.2402	0.3105	yes	C04230	Lipids	Phospholipids	map00564;map05231	Glycerophospholipid metabolism;Choline metabolism in cancer	Metabolism;Human Diseases	Lipid metabolism;Cancer: overview	HMDB0010382;LMGP01050018	Lipids and lipid-like molecules	Glycerophospholipids	Glycerophosphocholines	17364-16-8	496.34	7.73553	M+H	C24H50NO7P	86	0	pos
pos_5377	N2-Fructopyranosylarginine	metab_4820	3.38e-07	1.81e-06	1.2751	1.2666	0.7244	-0.4651	yes	-	-	-	-	-	-	-	HMDB0041541	Organic acids and derivatives	Carboxylic acids and derivatives	Amino acids, peptides, and analogues	162966-07-6	354.201	5.49047	M+NH4	C12H24N4O7	0	34.3	pos
pos_5905	posatirelin	metab_5401	5.23e-06	1.75e-05	1.2749	1.2723	1.3306	0.4121	yes	-	-	-	-	-	-	-	HMDB0256710	Organic acids and derivatives	Carboxylic acids and derivatives	Amino acids, peptides, and analogues	-	385.244	4.41453	M+CH3OH+H	C17H28N4O4	0	33.1	pos
pos_2099	Pro-Pro-Pro	metab_1216	6.94e-09	1.09e-07	1.2747	1.2762	1.2871	0.3642	yes	-	-	-	-	-	-	-	HMDB0256689	Organic acids and derivatives	Carboxylic acids and derivatives	Amino acids, peptides, and analogues	-	310.176	2.77185	M+H	C15H23N3O4	0	57.3	pos
neg_6810	L-Coprine	metab_14187	6.03e-05	0.0001532	1.2744	1.2752	1.3461	0.4288	yes	C08271	-	-	-	-	-	-	HMDB0034266	Organic acids and derivatives	Carboxylic acids and derivatives	Amino acids, peptides, and analogues	58919-61-2	403.183	3.43858	2M-H	C8H14N2O4	0	52.1	neg
neg_3272	Cholyltyrosine	metab_10271	0.0001123	0.0002551	1.2738	1.2657	1.2875	0.3646	yes	-	-	-	-	-	-	-	HMDB0242377	Lipids and lipid-like molecules	Steroids and steroid derivatives	Bile acids, alcohols and derivatives	-	570.343	6.1884	M-H	C33H49NO7	0	80.3	neg
neg_2993	Doisynoestrol	metab_9962	2.3e-06	1.11e-05	1.2735	1.2675	0.7259	-0.4622	yes	C15453	-	-	-	-	-	-	HMDB0252206	Lipids and lipid-like molecules	Steroids and steroid derivatives	Steroid acids	15372-34-6	319.13	5.80632	M+Na-2H	C19H22O3	0	40	neg
pos_7375	Nalpha-Acetyl-L-arginine	metab_7024	5.33e-06	1.77e-05	1.2716	1.2649	0.7524	-0.4105	yes	-	-	-	-	-	-	-	-	-	-	-	-	217.129	1.3264	M+H	C8H16N4O3	70.3	0	pos
neg_4719	Decanedioic acid	metab_11872	7.4e-06	2.79e-05	1.2715	1.264	0.7249	-0.4641	yes	C08277	-	-	-	-	-	-	LMFA01170006;HMDB0000792	Lipids and lipid-like molecules	Fatty Acyls	Fatty acids and conjugates	111-20-6	201.113	6.04047	M-H	C10H18O4	86.3	0	neg
pos_3580	Estragole	metab_2844	1.29e-08	1.67e-07	1.271	1.264	0.7812	-0.3562	yes	C10452	-	-	map00940	Phenylpropanoid biosynthesis	Metabolism	Biosynthesis of other secondary metabolites	HMDB0034121;MJDBOTE0001746	Benzenoids	Phenol ethers	Anisoles	140-67-0	149.096	6.5759	M+H	C10H12O	37.2	0	pos
pos_3344	Abscisic acid	metab_2587	4.25e-05	0.0001037	1.2709	1.2576	0.6997	-0.5152	yes	C06082	-	-	map01100;map01110;map00906;map01070;map01062;map04075;map01060	Metabolic pathways;Biosynthesis of secondary metabolites;Carotenoid biosynthesis;Biosynthesis of plant hormones;Biosynthesis of terpenoids and steroids;Plant hormone signal transduction;Biosynthesis of plant secondary metabolites	Metabolism;Metabolism;Metabolism;Metabolism;Metabolism;Environmental Information Processing;Metabolism	Global and overview maps;Global and overview maps;Metabolism of terpenoids and polyketides;Chemical structure transformation maps;Chemical structure transformation maps;Signal transduction;Chemical structure transformation maps	HMDB0036093;HMDB0243505;HMDB0035140	Lipids and lipid-like molecules	Prenol lipids	Sesquiterpenoids	7773-56-0;21293-29-8	297.168	5.9558	M+CH3OH+H	C15H20O4	0	43.7	pos
neg_6590	4-Pyridoxolactone	metab_13943	1.4e-08	2.07e-07	1.2703	1.2626	0.6524	-0.6162	yes	C00971	-	-	map00750;map01120	Vitamin B6 metabolism;Microbial metabolism in diverse environments	Metabolism;Metabolism	Metabolism of cofactors and vitamins;Global and overview maps	HMDB0003454	Organoheterocyclic compounds	Pyridines and derivatives	Pyridinecarboxylic acids and derivatives	4753-19-9	146.024	3.65848	M-H2O-H	C8H7NO3	0	46.9	neg
neg_2243	6-allyl-8b-Carboxy-ergoline	metab_9135	5.25e-06	2.12e-05	1.2701	1.2581	0.7119	-0.4903	yes	-	-	-	-	-	-	-	HMDB0060782	Alkaloids and derivatives	Ergoline and derivatives	Lysergic acids and derivatives	-	333.101	4.4379	M+K-2H	C18H20N2O2	0	30.8	neg
pos_7181	Ribonolactone	metab_6814	3.85e-05	9.53e-05	1.2698	1.2647	0.7031	-0.5082	yes	C02674	-	-	-	-	-	-	HMDB0001900	Organic oxygen compounds	Organooxygen compounds	Carbohydrates and carbohydrate conjugates	5336-08-03	190.071	2.54032	M+ACN+H	C5H8O5	0	46.7	pos
pos_2201	Strictosidine	metab_1329	1.44e-07	9.27e-07	1.2697	1.2684	1.3457	0.4284	yes	C03470	-	-	map01100;map01110;map01063;map00901;map01060	Metabolic pathways;Biosynthesis of secondary metabolites;Biosynthesis of alkaloids derived from shikimate pathway;Indole alkaloid biosynthesis;Biosynthesis of plant secondary metabolites	Metabolism;Metabolism;Metabolism;Metabolism;Metabolism	Global and overview maps;Global and overview maps;Chemical structure transformation maps;Biosynthesis of other secondary metabolites;Chemical structure transformation maps	HMDB0304492	Lipids and lipid-like molecules	Prenol lipids	Terpene glycosides	20824-29-7	548.256	2.95345	M+NH4	C27H34N2O9	0	55	pos
pos_3192	Cadabicine	metab_2422	2.48e-08	2.67e-07	1.2695	1.267	0.7749	-0.3679	yes	-	-	-	-	-	-	-	HMDB0033451	Organic oxygen compounds	Organooxygen compounds	Ethers	99964-83-7	468.249	5.5471	M+CH3OH+H	C25H29N3O4	0	79.5	pos
neg_6763	Tetraxetan	metab_14135	5.16e-08	5.75e-07	1.2694	1.2669	1.3753	0.4597	yes	-	-	-	-	-	-	-	HMDB0251592	Organic acids and derivatives	Carboxylic acids and derivatives	Tetracarboxylic acids and derivatives	-	385.173	3.48562	M-H2O-H	C16H28N4O8	0	48	neg
neg_5931	Lys Asp Leu Glu	metab_13216	1.7e-08	2.41e-07	1.2693	1.265	1.3793	0.464	yes	-	-	-	-	-	-	-	-	-	-	-	-	502.252	4.4144	M-H	C21H37N5O9	53.2	0	neg
neg_6356	Hydroxyprolyl-Alanine	metab_13684	0.002252	0.003452	1.2693	1.286	1.4175	0.5034	yes	-	-	-	-	-	-	-	HMDB0028856	Organic acids and derivatives	Carboxylic acids and derivatives	Amino acids, peptides, and analogues	-	403.183	3.90323	2M-H	C8H14N2O4	0	62.9	neg
pos_2272	Methionylhydroxyproline	metab_1406	0.0001278	0.0002734	1.2688	1.2762	1.4645	0.5504	yes	-	-	-	-	-	-	-	HMDB0028974	Organic acids and derivatives	Carboxylic acids and derivatives	Amino acids, peptides, and analogues	148305-57-1	304.133	3.09688	M+ACN+H	C10H18N2O4S	0	43.1	pos
neg_1558	(5E,7E)-Undeca-2,5,7-trienedioylcarnitine	metab_8375	7.78e-05	0.000188	1.2687	1.2684	1.3839	0.4687	yes	-	-	-	-	-	-	-	HMDB0241202	Lipids and lipid-like molecules	Fatty Acyls	Fatty acid esters	-	374.157	3.49345	M+Na-2H	C18H27NO6	0	36.5	neg
pos_5688	11,12-DiHETrE	metab_5160	3.85e-05	9.53e-05	1.2685	1.2726	0.689	-0.5374	yes	C14774	-	-	map00590;map01100;map04726	Arachidonic acid metabolism;Metabolic pathways;Serotonergic synapse	Metabolism;Metabolism;Organismal Systems	Lipid metabolism;Global and overview maps;Nervous system	HMDB0002314;PW_C001562	Lipids and lipid-like molecules	Fatty Acyls	Eicosanoids	192461-95-3	402.263	4.85707	M+ACN+Na	C20H34O4	0	74.1	pos
pos_4750	Deoxyspergualin	metab_4130	0.003356	0.004958	1.2684	1.2375	1.4238	0.5097	yes	-	-	-	-	-	-	-	HMDB0243514	Organic acids and derivatives	Carboxylic acids and derivatives	Amino acids, peptides, and analogues	-	370.295	6.28965	M+H-H2O	C17H37N7O3	0	69.3	pos
neg_6665	AFN911	metab_14026	4.71e-05	0.0001257	1.2684	1.2694	1.3663	0.4503	yes	-	-	-	-	-	-	-	HMDB0013863	Organoheterocyclic compounds	Diazines	Pyrimidines and pyrimidine derivatives	-	546.242	3.58013	M+Cl	C29H33N7O2	0	66	neg
neg_6549	Aesculin	metab_13897	0.0009005	0.001522	1.2683	1.2489	0.704	-0.5064	yes	C09264	-	-	-	-	-	-	HMDB0030820	Phenylpropanoids and polyketides	Coumarins and derivatives	Coumarin glycosides	531-75-9	321.065	3.69832	M-H2O-H	C15H16O9	0	35.8	neg
pos_5080	Corynanthine	metab_4493	0.0001717	0.0003525	1.2682	1.2751	0.7066	-0.5011	yes	C09256	-	-	-	-	-	-	HMDB0250478;HMDB0015464	Lipids and lipid-like molecules	Steroids and steroid derivatives	Stigmastanes and derivatives	146-48-5	418.212	5.99563	M+ACN+Na	C21H26N2O3	0	52.8	pos
pos_6427	3,4-Dimethoxybenzaldehyde	metab_5981	3.98e-06	1.39e-05	1.2676	1.2557	0.6543	-0.6121	yes	C02201	-	-	-	-	-	-	HMDB0032138	Benzenoids	Benzene and substituted derivatives	Methoxybenzenes	120-14-9	167.07	3.5446	M+H	C9H10O3	71.7	0	pos
neg_4750	Prostaglandin B2	metab_11907	7.46e-07	4.72e-06	1.2663	1.2646	0.7428	-0.429	yes	C05954	Lipids	Eicosanoids	map00590;map01100;map04726	Arachidonic acid metabolism;Metabolic pathways;Serotonergic synapse	Metabolism;Metabolism;Organismal Systems	Lipid metabolism;Global and overview maps;Nervous system	HMDB0004236;LMFA03010018;PW_C002099	Lipids and lipid-like molecules	Fatty Acyls	Eicosanoids	13367-85-6	379.213	6.0095	M+FA-H	C20H30O4	0	65.4	neg
neg_1819	Yohimbine	metab_8665	6.8e-08	7.13e-07	1.2661	1.2661	1.358	0.4415	yes	C09256	-	-	-	-	-	-	HMDB0015464	Alkaloids and derivatives	Yohimbine alkaloids	Not Available	146-48-5	389.167	3.82435	M+Cl	C21H26N2O3	0	47.1	neg
neg_3440	Alpha-Linolenoyl ethanolamide	metab_10458	2.4e-07	1.95e-06	1.2659	1.2692	1.386	0.4709	yes	C13828	-	-	-	-	-	-	HMDB0013624	Organic nitrogen compounds	Organonitrogen compounds	Amines	-	366.265	6.51547	M+FA-H	C20H35NO2	0	55.3	neg
pos_4908	Glycochenodeoxycholate-3-sulfate	metab_4304	2.66e-07	1.5e-06	1.2658	1.2641	0.7496	-0.4158	yes	-	-	-	-	-	-	-	HMDB0002497	Lipids and lipid-like molecules	Steroids and steroid derivatives	Bile acids, alcohols and derivatives	67030-54-0	562.304	6.12315	M+CH3OH+H	C26H43NO8S	0	67.7	pos
neg_1658	Rotundifoline	metab_8486	1.5e-05	4.97e-05	1.2652	1.2633	1.4329	0.519	yes	-	-	-	-	-	-	-	HMDB0302761	Organoheterocyclic compounds	Indolizidines	Not Available	-	421.173	3.61147	M+Na-2H	C22H28N2O5	0	55	neg
pos_3363	Sulfonamidoethanol	metab_2608	0.0002926	0.0005656	1.2649	1.2477	1.3978	0.4832	yes	-	-	-	-	-	-	-	HMDB0258596	Organic acids and derivatives	Organic sulfonic acids and derivatives	Organosulfonic acids and derivatives	-	126.022	6.0035	M+H	C2H7NO3S	0	47.2	pos
neg_6594	Tilsuprost	metab_13947	0.0003244	0.0006167	1.2645	1.2619	1.3653	0.4493	yes	-	-	-	-	-	-	-	HMDB0259097	Lipids and lipid-like molecules	Fatty Acyls	Fatty acid esters	-	428.215	3.65065	M+FA-H	C20H33NO4S	0	45.9	neg
pos_4877	Docosahexaenoic acid	metab_4269	8.26e-10	2.27e-08	1.2645	1.263	1.4001	0.4855	yes	C06429	Lipids	Fatty acids	map01040	Biosynthesis of unsaturated fatty acids	Metabolism	Lipid metabolism	HMDB0002183;PW_C001472;LMFA01031176;LMFA01030185	Lipids and lipid-like molecules	Fatty Acyls	Fatty acids and conjugates	6217-54-5	293.226	6.155	M+H-2H2O	C22H32O2	0	58.6	pos
pos_7306	Xanthine	metab_6948	7.91e-05	0.0001781	1.2643	1.2481	0.7936	-0.3335	yes	C00385	-	-	map01100;map01110;map00230;map01120;map00232;map01065;map01060	Metabolic pathways;Biosynthesis of secondary metabolites;Purine metabolism;Microbial metabolism in diverse environments;Caffeine metabolism;Biosynthesis of alkaloids derived from histidine and purine;Biosynthesis of plant secondary metabolites	Metabolism;Metabolism;Metabolism;Metabolism;Metabolism;Metabolism;Metabolism	Global and overview maps;Global and overview maps;Nucleotide metabolism;Global and overview maps;Biosynthesis of other secondary metabolites;Chemical structure transformation maps;Chemical structure transformation maps	PW_C000198;HMDB0000292;MJDBOTE0000403	Organoheterocyclic compounds	Imidazopyrimidines	Purines and purine derivatives	69-89-6	153.041	1.74957	M+H	C5H4N4O2	89.2	0	pos
pos_3176	N-Nitroso(2-hydroxypropyl)(2-oxopropyl)amine	metab_2404	0.0002174	0.0004329	1.2635	1.2718	1.5428	0.6256	yes	-	-	-	-	-	-	-	HMDB0253217	Organic nitrogen compounds	Organonitrogen compounds	Organic nitroso compounds	-	338.204	5.51512	2M+NH4	C6H12N2O3	0	33.8	pos
neg_5626	1-Hydroxyisoquinoline	metab_12878	2.42e-07	1.96e-06	1.2631	1.2598	0.7512	-0.4128	yes	C06324	-	-	-	-	-	-	HMDB0243900	Organoheterocyclic compounds	Isoquinolines and derivatives	Isoquinolones and derivatives	-	190.05	4.88793	M+FA-H	C9H7NO	0	39.7	neg
pos_11	(2S)-2-[[2-(5-methoxyindol-1-yl)acetyl]amino]-4-methylpentanoic acid	metab_112	8.16e-09	1.22e-07	1.263	1.2573	0.7957	-0.3297	yes	-	-	-	-	-	-	-	-	-	-	-	-	319.165	5.8838	M+H, M+Na, 2M+H, 2M+Na, M+H-H2O	C17H22N2O4	32.2	0	pos
pos_5067	Palitantin, (+)-	metab_4478	3.32e-05	8.38e-05	1.2629	1.2532	0.7055	-0.5033	yes	-	-	-	-	-	-	-	-	-	-	-	-	255.159	6.01148	M+H	C14H22O4	62.2	0	pos
pos_6159	5-Methoxytryptophan	metab_5683	6.18e-06	2.01e-05	1.2625	1.2565	1.4215	0.5074	yes	-	-	-	-	-	-	-	HMDB0002339	Organoheterocyclic compounds	Indoles and derivatives	Tryptamines and derivatives	2504-22-5	267.134	3.97132	M+CH3OH+H	C12H14N2O3	0	46.5	pos
pos_3578	5beta-Cholanic acid	metab_2841	0.0002016	0.0004055	1.262	1.2571	1.3252	0.4062	yes	C19642	-	-	-	-	-	-	HMDB0247018	Lipids and lipid-like molecules	Steroids and steroid derivatives	Bile acids, alcohols and derivatives	546-18-9	383.294	6.56792	M+Na	C24H40O2	0	31.8	pos
neg_5748	Valylhydroxyproline	metab_13012	0.0001588	0.0003401	1.2618	1.2655	1.429	0.515	yes	-	-	-	-	-	-	-	HMDB0029128	Organic acids and derivatives	Carboxylic acids and derivatives	Amino acids, peptides, and analogues	90965-79-0	459.246	4.66703	2M-H	C10H18N2O4	0	73.9	neg
pos_2487	Hydroxyprolyl-Tryptophan	metab_1643	0.008802	0.01197	1.2618	1.2779	1.4988	0.5838	yes	-	-	-	-	-	-	-	HMDB0028874	Organic acids and derivatives	Carboxylic acids and derivatives	Amino acids, peptides, and analogues	-	318.145	3.5926	M+H	C16H19N3O4	0	62.6	pos
neg_2850	R-limonene	metab_9806	3.4e-06	1.52e-05	1.2617	1.2536	0.6999	-0.5148	yes	C06099	-	-	map01100;map01110;map00903;map00902;map01062	Metabolic pathways;Biosynthesis of secondary metabolites;Limonene and pinene degradation;Monoterpenoid biosynthesis;Biosynthesis of terpenoids and steroids	Metabolism;Metabolism;Metabolism;Metabolism;Metabolism	Global and overview maps;Global and overview maps;Metabolism of terpenoids and polyketides;Metabolism of terpenoids and polyketides;Chemical structure transformation maps	HMDB0003375;HMDB0257077	Lipids and lipid-like molecules	Prenol lipids	Monoterpenoids	5989-27-5	229.108	5.51037	M+FA-H	C10H16O3	0	36.7	neg
pos_4363	7-Aminoheptanoic acid	metab_3704	2.26e-06	8.61e-06	1.2617	1.2565	1.2906	0.368	yes	-	-	-	-	-	-	-	HMDB0247233	Lipids and lipid-like molecules	Fatty Acyls	Fatty acids and conjugates	-	184.073	6.8541	M+K	C7H15NO2	0	59.5	pos
pos_5181	Ripisartan	metab_4605	0.0002545	0.0004982	1.2616	1.2663	0.6756	-0.5658	yes	-	-	-	-	-	-	-	HMDB0257241	Benzenoids	Benzene and substituted derivatives	Biphenyls and derivatives	-	459.223	5.8918	M+CH3OH+H	C23H22N8O	0	36.3	pos
pos_3148	2-Furanmethanol	metab_2373	9.73e-06	2.94e-05	1.2615	1.2514	1.4221	0.508	yes	C20441	-	-	map01120;map00365	Microbial metabolism in diverse environments;Furfural degradation	Metabolism;Metabolism	Global and overview maps;Xenobiotics biodegradation and metabolism	HMDB0013742	Organoheterocyclic compounds	Heteroaromatic compounds	Not Available	98-00-0	197.081	5.42647	2M+H	C5H6O2	0	52.2	pos
pos_3164	PS(PGJ2/14:1(9Z))	metab_2391	3.06e-07	1.67e-06	1.2611	1.2615	1.3894	0.4745	yes	-	-	-	-	-	-	-	HMDB0280935	Not Available	Not Available	Not Available	-	748.424	5.45847	M+H-2H2O	C40H66NO12P	0	55.2	pos
neg_5283	Exo,exo-1,8-Epoxy-p-menthane-2,6-diol	metab_12498	6.44e-07	4.22e-06	1.2611	1.2539	0.6923	-0.5305	yes	C17620	-	-	-	-	-	-	HMDB0041376	Organoheterocyclic compounds	Oxanes	Not Available	38223-98-2	231.123	5.39572	M+FA-H	C10H18O3	0	68.5	neg
pos_7651	Lysyl-Lysine	metab_7327	0.0008046	0.001385	1.261	1.2725	1.4957	0.5808	yes	-	-	-	-	-	-	-	HMDB0028956;HMDB0304785	Organic acids and derivatives	Carboxylic acids and derivatives	Amino acids, peptides, and analogues	13184-13-9	138.108	0.7323	M+2H	C12H26N4O3	0	33.8	pos
pos_2746	2-Hydroxynevirapine	metab_1928	0.0008833	0.001505	1.2608	1.2531	0.6706	-0.5764	yes	C16608	-	-	map00982	Drug metabolism - cytochrome P450	Metabolism	Xenobiotics biodegradation and metabolism	PW_C008647;HMDB0013912	Benzenoids	Benzene and substituted derivatives	Phenylbutylamines	-	300.147	4.23732	M+NH4	C15H14N4O2	0	62.1	pos
neg_6873	Quinol glucuronide	metab_14256	1.04e-06	6.03e-06	1.2607	1.2522	0.7192	-0.4756	yes	-	-	-	-	-	-	-	HMDB0259508	Organic oxygen compounds	Organooxygen compounds	Carbohydrates and carbohydrate conjugates	-	285.062	3.38312	M-H	C12H14O8	0	32.1	neg
pos_3029	Gardenin B	metab_2241	1.46e-05	4.15e-05	1.2603	1.2598	0.6662	-0.5859	yes	C15109	-	-	-	-	-	-	HMDB0302154;LMPK12111451	Phenylpropanoids and polyketides	Flavonoids	O-methylated flavonoids	2798-20-1	341.102	5.05775	M+H-H2O	C19H18O7	0	71.2	pos
pos_4625	2-Pentyl-3-phenyl-2-propenal	metab_3994	1.14e-05	3.35e-05	1.2603	1.2527	0.7368	-0.4406	yes	C12288	-	-	-	-	-	-	HMDB0031313	Phenylpropanoids and polyketides	Cinnamaldehydes	Not Available	122-40-7	203.143	6.45648	M+H	C14H18O	0	53.2	pos
neg_1230	Asparaginyl-Methionine	metab_8013	0.0004476	0.0008141	1.2602	1.2643	1.4629	0.5488	yes	-	-	-	-	-	-	-	HMDB0028737	Organic acids and derivatives	Carboxylic acids and derivatives	Amino acids, peptides, and analogues	-	262.087	2.50508	M-H	C9H17N3O4S	0	50.4	neg
pos_5130	Lucidenic acid N	metab_4549	0.0005337	0.0009636	1.26	1.2496	0.6749	-0.5672	yes	-	-	-	-	-	-	-	HMDB0038352	Phenylpropanoids and polyketides	Flavonoids	O-methylated flavonoids	364622-33-3	443.276	5.94782	M+H-H2O	C27H40O6	0	72.3	pos
neg_2172	Lamivudine-monophosphate	metab_9057	2.07e-06	1.01e-05	1.2599	1.2602	0.6817	-0.5528	yes	-	-	-	-	-	-	-	HMDB0060641;PW_C040659	Nucleosides, nucleotides, and analogues	Nucleoside and nucleotide analogues	Not Available	-	289.998	4.32042	M-H2O-H	C8H12N3O6PS	0	42.3	neg
pos_6230	Asp Trp	metab_5763	0.000323	0.0006177	1.2597	1.2662	1.4698	0.5556	yes	-	-	-	-	-	-	-	-	-	-	-	-	320.124	3.84197	M+H	C15H17N3O5	80.9	0	pos
neg_6850	6-(2-Hydroxyethoxy)-6-oxohexanoic acid	metab_14231	6.61e-07	4.31e-06	1.2595	1.2532	0.699	-0.5166	yes	-	-	-	-	-	-	-	HMDB0061681	Lipids and lipid-like molecules	Fatty Acyls	Fatty acids and conjugates	-	171.065	3.40662	M-H2O-H	C8H14O5	0	50.2	neg
pos_789	Ala Val Val Pro Leu	metab_7462	5.85e-05	0.000137	1.2593	1.2666	1.4136	0.4994	yes	-	-	-	-	-	-	-	-	-	-	-	-	498.328	5.57107	M+H, M+Na	C24H43N5O6	63.8	0	pos
neg_6260	Tirofiban	metab_13578	0.003502	0.005161	1.2592	1.2721	1.4049	0.4905	yes	C07965	-	-	-	-	-	-	HMDB0014913;PW_C009242	Organic acids and derivatives	Carboxylic acids and derivatives	Amino acids, peptides, and analogues	144494-65-5	475.204	4.01348	M+Cl	C22H36N2O5S	0	52.4	neg
pos_6951	Leu Glu Glu	metab_6558	0.001196	0.00197	1.2589	1.2689	1.364	0.4478	yes	-	-	-	-	-	-	-	-	-	-	-	-	390.187	2.81167	M+H	C16H27N3O8	80.5	0	pos
pos_6483	Gamma-Glutamyl-5-hydroxytryptophan	metab_6043	4.67e-05	0.0001122	1.2589	1.2582	1.4011	0.4866	yes	-	-	-	-	-	-	-	HMDB0252616	Organic acids and derivatives	Carboxylic acids and derivatives	Amino acids, peptides, and analogues	-	391.161	3.45608	M+ACN+H	C16H19N3O6	0	39.7	pos
pos_2626	Ethyl 7-epi-12-hydroxyjasmonate glucoside	metab_1796	0.002011	0.003125	1.2588	1.2376	1.4585	0.5445	yes	-	-	-	-	-	-	-	HMDB0036340	Lipids and lipid-like molecules	Fatty Acyls	Fatty acyl glycosides	-	449.239	3.91463	M+CH3OH+H	C20H32O9	0	57.9	pos
neg_6663	3-Amino-2,3-dihydrobenzoic acid	metab_14024	5.77e-07	3.87e-06	1.2588	1.2532	0.7371	-0.44	yes	C12110	-	-	-	-	-	-	HMDB0251519	Organic acids and derivatives	Carboxylic acids and derivatives	Amino acids, peptides, and analogues	87980-11-8	184.061	3.58797	M+FA-H	C7H9NO2	0	56.7	neg
pos_1903	5-Methylcytidine	metab_1000	0.00113	0.001876	1.2587	1.2704	1.4139	0.4997	yes	-	-	-	-	-	-	-	HMDB0257731;HMDB0000982	Nucleosides, nucleotides, and analogues	Pyrimidine nucleosides	Not Available	2140-61-6	290.135	1.70157	M+CH3OH+H	C10H15N3O5	0	44.9	pos
neg_1228	2-Oxoarginine	metab_8010	0.0001623	0.0003461	1.2586	1.247	1.5502	0.6325	yes	C03771	-	-	map01100;map00330	Metabolic pathways;Arginine and proline metabolism	Metabolism;Metabolism	Global and overview maps;Amino acid metabolism	HMDB0004225;PW_C002094	Organic acids and derivatives	Keto acids and derivatives	Short-chain keto acids and derivatives	3715-10-04	154.061	2.48942	M-H2O-H	C6H11N3O3	0	39.5	neg
neg_7133	Lysylhydroxyproline	metab_14545	0.0001647	0.0003506	1.2584	1.2583	1.3106	0.3903	yes	-	-	-	-	-	-	-	HMDB0028952	Organic acids and derivatives	Carboxylic acids and derivatives	Amino acids, peptides, and analogues	870233-57-1	304.151	3.0444	M+FA-H	C11H21N3O4	0	76.4	neg
pos_664	Leu Glu Ile Glu	metab_6215	0.0001984	0.0004008	1.2583	1.2648	1.4292	0.5152	yes	-	-	-	-	-	-	-	-	-	-	-	-	503.271	4.29402	M+H, M+ACN+H	C22H38N4O9	62.8	0	pos
pos_3034	2,6,6-Trimethyl-2-cyclohexene-1,4-dione	metab_2247	2.45e-07	1.4e-06	1.2582	1.2526	0.7407	-0.433	yes	-	-	-	-	-	-	-	HMDB0040216	Organic oxygen compounds	Organooxygen compounds	Carbonyl compounds	1125-21-9	194.118	5.07375	M+ACN+H	C9H12O2	0	35.1	pos
neg_5422	10-Hydroxydecanoic acid	metab_12652	0.001399	0.002253	1.2574	1.2358	0.6458	-0.6309	yes	C02774	-	-	-	-	-	-	HMDB0244272	Organic acids and derivatives	Hydroxy acids and derivatives	Medium-chain hydroxy acids and derivatives	1679-53-4	233.139	5.1912	M+FA-H	C10H20O3	0	57.6	neg
pos_3030	Thr Leu Phe	metab_2243	4.02e-05	9.87e-05	1.2573	1.2574	1.4029	0.4884	yes	-	-	-	-	-	-	-	-	-	-	-	-	380.218	5.05775	M+H	C19H29N3O5	70.3	0	pos
pos_1613	Glutaminylglycine	metab_682	0.0002371	0.0004674	1.2564	1.2618	1.3621	0.4459	yes	-	-	-	-	-	-	-	HMDB0028797	Organic acids and derivatives	Carboxylic acids and derivatives	Amino acids, peptides, and analogues	2650-65-9	226.08	0.9301	M+Na, M+K	C7H13N3O4	0	48	pos
neg_7257	Thymidine glycol	metab_14681	3.92e-07	2.86e-06	1.2561	1.2592	1.3397	0.4219	yes	-	-	-	-	-	-	-	HMDB0042036	Nucleosides, nucleotides, and analogues	Pyrimidine nucleosides	Pyrimidine 2''-deoxyribonucleosides	32645-65-1	275.089	1.6281	M-H	C10H16N2O7	0	55.4	neg
pos_2659	Ala-Cys-Gly	metab_1832	1.69e-07	1.06e-06	1.256	1.2545	0.694	-0.5269	yes	-	-	-	-	-	-	-	HMDB0248093	Organic acids and derivatives	Carboxylic acids and derivatives	Amino acids, peptides, and analogues	-	294.047	3.99532	M+2Na-H	C8H15N3O4S	0	81.6	pos
neg_3063	Buntanine	metab_10041	0.02533	0.03118	1.2555	1.2332	1.5887	0.6678	yes	C10653	-	-	-	-	-	-	HMDB0038590	Organoheterocyclic compounds	Quinolines and derivatives	Benzoquinolines	119116-85-7	400.143	5.89217	M+FA-H	C20H21NO5	0	33.3	neg
neg_3315	1-Arachidonoylglycerol	metab_10319	0.001971	0.003056	1.2545	1.2437	1.255	0.3277	yes	C13857	-	-	-	-	-	-	HMDB0243830;HMDB0011578;LMGL01010032	Lipids and lipid-like molecules	Glycerolipids	Monoradylglycerols	124511-15-5	815.568	6.28143	2M+Hac-H	C23H38O4	0	39.1	neg
pos_874	Chenodeoxycholyl-L-dopa	metab_7555	0.003143	0.004671	1.2541	1.2492	1.351	0.434	yes	-	-	-	-	-	-	-	HMDB0242407	Not Available	Not Available	Not Available	-	572.358	6.155	M+H-2H2O, M+H	C33H49NO7	0	42.9	pos
pos_6688	4-(4-Methylcyclohexyl)-4-oxobutanoic acid	metab_6267	0.003096	0.004607	1.2539	1.2266	0.6439	-0.6351	yes	-	-	-	-	-	-	-	HMDB0253742	Organic acids and derivatives	Keto acids and derivatives	Gamma-keto acids and derivatives	-	216.159	3.16903	M+NH4	C11H18O3	0	35.3	pos
pos_3552	Vomifoliol	metab_2814	2.96e-07	1.63e-06	1.2538	1.2487	0.7819	-0.355	yes	C04166	-	-	-	-	-	-	HMDB0303570	Lipids and lipid-like molecules	Prenol lipids	Sesquiterpenoids	-	189.127	6.45648	M+H-2H2O	C13H20O3	0	79	pos
neg_7354	3,4-Dihydroxy-2-hydroxymethyl-1-pyrrolidinepropanamide	metab_14787	0.0001431	0.0003121	1.253	1.2545	1.354	0.4373	yes	-	-	-	-	-	-	-	HMDB0039948	Organoheterocyclic compounds	Pyrrolidines	N-alkylpyrrolidines	-	203.103	1.00085	M-H	C8H16N2O4	0	31.3	neg
neg_5092	2-Aminobenzylstatine	metab_12286	2.7e-06	1.26e-05	1.253	1.2516	0.695	-0.5249	yes	-	-	-	-	-	-	-	HMDB0245010	Organic acids and derivatives	Carboxylic acids and derivatives	Amino acids, peptides, and analogues	-	261.161	5.68528	M-H2O-H	C15H24N2O3	0	39.8	neg
neg_1164	Glutaminylproline	metab_7939	0.001263	0.002058	1.2527	1.261	1.416	0.5018	yes	-	-	-	-	-	-	-	HMDB0028805	Organic acids and derivatives	Carboxylic acids and derivatives	Amino acids, peptides, and analogues	139370-58-4	288.12	1.69075	M+FA-H	C10H17N3O4	0	55.5	neg
pos_1855	2-Deoxy-L-ribono-1,4-lactone	metab_947	6.96e-08	5.48e-07	1.2525	1.2437	0.706	-0.5023	yes	-	-	-	-	-	-	-	HMDB0033958	Organoheterocyclic compounds	Lactones	Gamma butyrolactones	38996-14-4	174.076	1.22282	M+ACN+H	C5H8O4	0	38.6	pos
pos_4423	LysoPE(18:1(9Z)/0:0)	metab_3771	2.55e-06	9.55e-06	1.2525	1.2604	1.2698	0.3446	yes	-	-	-	-	-	-	-	HMDB0011506	Lipids and lipid-like molecules	Glycerophospholipids	Glycerophosphoethanolamines	89576-29-4	480.308	6.77455	M+H	C23H46NO7P	0	60.3	pos
pos_6329	Astromicin	metab_5872	0.000278	0.0005409	1.2524	1.2449	1.367	0.451	yes	C17708	-	-	-	-	-	-	HMDB0248678	Organic oxygen compounds	Organooxygen compounds	Carbohydrates and carbohydrate conjugates	55779-06-1	428.25	3.68145	M+Na	C17H35N5O6	0	70.1	pos
neg_3145	3-Cyclopentylpropionic acid	metab_10131	3.63e-06	1.59e-05	1.2523	1.2419	0.7585	-0.3987	yes	-	-	-	-	-	-	-	HMDB0245846	Organic acids and derivatives	Carboxylic acids and derivatives	Carboxylic acids	-	343.212	5.9627	2M+Hac-H	C8H14O2	0	37	neg
neg_1986	Histidylmethionine	metab_8850	6.53e-07	4.26e-06	1.2522	1.2424	0.7414	-0.4317	yes	-	-	-	-	-	-	-	HMDB0028891	Organic acids and derivatives	Carboxylic acids and derivatives	Amino acids, peptides, and analogues	2488-11-01	267.091	4.05267	M-H2O-H	C11H18N4O3S	0	30.5	neg
pos_6796	Ne,Ne dimethyllysine	metab_6386	3.27e-05	8.27e-05	1.2518	1.2376	1.4601	0.546	yes	C05545	-	-	map01100;map00310	Metabolic pathways;Lysine degradation	Metabolism;Metabolism	Global and overview maps;Amino acid metabolism	HMDB0013287	Organic acids and derivatives	Carboxylic acids and derivatives	Amino acids, peptides, and analogues	-	157.134	3.02515	M+H-H2O	C8H18N2O2	0	41.5	pos
neg_1763	Murnac-tripeptide	metab_8603	0.0002982	0.0005741	1.2518	1.2571	1.3864	0.4713	yes	-	-	-	-	-	-	-	HMDB0254953	Organic acids and derivatives	Carboxylic acids and derivatives	Amino acids, peptides, and analogues	-	663.285	3.74533	M-H	C26H44N6O14	0	78.9	neg
neg_7312	Dihydroxyacetone	metab_14742	0.000277	0.0005406	1.2516	1.2403	1.3041	0.3831	yes	C00184	Carbohydrates	Monosaccharides	map00680;map01100;map01200;map00561;map01120	Methane metabolism;Metabolic pathways;Carbon metabolism;Glycerolipid metabolism;Microbial metabolism in diverse environments	Metabolism;Metabolism;Metabolism;Metabolism;Metabolism	Energy metabolism;Global and overview maps;Global and overview maps;Lipid metabolism;Global and overview maps	HMDB0001882	Organic oxygen compounds	Organooxygen compounds	Carbohydrates and carbohydrate conjugates	96-26-4	269.088	1.25157	3M-H	C3H6O3	31.8	0	neg
pos_1189	N-Arachidonoyl Threonine	metab_210	0.0001068	0.0002333	1.2511	1.2377	0.7922	-0.3361	yes	-	-	-	-	-	-	-	HMDB0242004	Organic acids and derivatives	Carboxylic acids and derivatives	Amino acids, peptides, and analogues	-	406.295	6.35318	M+H, M+NH4	C24H39NO4	0	40	pos
pos_1340	Sulfoglycolithocholate(2-)	metab_379	5.23e-05	0.0001236	1.2501	1.2323	1.2606	0.3341	yes	-	-	-	-	-	-	-	HMDB0062801	Lipids and lipid-like molecules	Steroids and steroid derivatives	Bile acids, alcohols and derivatives	-	496.273	6.02748	M+H, M+H-H2O	C26H43NO7S	0	44.9	pos
pos_6005	Ginsenoside Rh8	metab_5513	2.15e-06	8.28e-06	1.2499	1.2396	1.368	0.452	yes	-	-	-	-	-	-	-	HMDB0039943	Lipids and lipid-like molecules	Prenol lipids	Triterpenoids	343780-69-8	681.393	4.22932	M+2Na-H	C36H60O9	0	31.6	pos
pos_2222	Tyrosyl-Lysine	metab_1352	0.0001835	0.0003742	1.2491	1.2371	0.697	-0.5207	yes	-	-	-	-	-	-	-	HMDB0029110	Organic acids and derivatives	Carboxylic acids and derivatives	Amino acids, peptides, and analogues	-	342.202	3.00133	M+CH3OH+H	C15H23N3O4	0	62.4	pos
pos_6073	Pipecolic acid	metab_5588	0.0001113	0.000242	1.2489	1.2556	1.487	0.5724	yes	C00408	-	-	map01100;map00310;map01110;map00960;map01064;map01060	Metabolic pathways;Lysine degradation;Biosynthesis of secondary metabolites;Tropane, piperidine and pyridine alkaloid biosynthesis;Biosynthesis of alkaloids derived from ornithine, lysine and nicotinic acid;Biosynthesis of plant secondary metabolites	Metabolism;Metabolism;Metabolism;Metabolism;Metabolism;Metabolism	Global and overview maps;Amino acid metabolism;Global and overview maps;Biosynthesis of other secondary metabolites;Chemical structure transformation maps;Chemical structure transformation maps	HMDB0000070;HMDB0000716	Organic acids and derivatives	Carboxylic acids and derivatives	Amino acids, peptides, and analogues	535-75-1;3105-95-1	259.165	4.1006	2M+H	C6H11NO2	0	57.2	pos
pos_104	Adb-chminaca, (+/-)-	metab_46	0.0001885	0.0003833	1.2484	1.2545	1.3209	0.4015	yes	-	-	-	-	-	-	-	HMDB0244819	Organic acids and derivatives	Carboxylic acids and derivatives	Amino acids, peptides, and analogues	-	393.223	4.92107	M+Na, M+2Na-H, M+H-2H2O	C21H30N4O2	0	36.6	pos
pos_1948	4-(Glutamylamino) butanoate	metab_1049	0.0005784	0.001034	1.2478	1.2585	1.3999	0.4853	yes	C15767	-	-	map01100;map00330	Metabolic pathways;Arginine and proline metabolism	Metabolism;Metabolism	Global and overview maps;Amino acid metabolism	HMDB0012161	Organic acids and derivatives	Carboxylic acids and derivatives	Amino acids, peptides, and analogues	5105-96-4	233.113	1.87688	M+H	C9H16N2O5	0	40.9	pos
pos_5658	Coumaryl acetate	metab_5127	5.91e-07	2.89e-06	1.2476	1.2441	0.7823	-0.3542	yes	C20465	-	-	map00940	Phenylpropanoid biosynthesis	Metabolism	Biosynthesis of other secondary metabolites	HMDB0304297	Benzenoids	Benzene and substituted derivatives	Styrenes	-	210.112	4.92907	M+NH4	C11H12O3	0	51.9	pos
neg_6497	Fluticasone 17beta-carboxylic acid	metab_13839	2.9e-09	6.17e-08	1.2474	1.2465	1.3427	0.4252	yes	-	-	-	-	-	-	-	HMDB0061092	Lipids and lipid-like molecules	Steroids and steroid derivatives	Androstane steroids	-	837.349	3.75317	2M+FA-H	C21H26F2O5	0	58.5	neg
neg_3150	AK toxin I	metab_10137	7.42e-06	2.8e-05	1.2473	1.2482	1.3116	0.3914	yes	C16787	-	-	-	-	-	-	HMDB0030401	Organic acids and derivatives	Carboxylic acids and derivatives	Amino acids, peptides, and analogues	85146-09-4	458.186	5.9627	M+FA-H	C23H27NO6	0	49.8	neg
pos_5689	Tyrosyl-Serine	metab_5161	0.0001862	0.000379	1.2472	1.2465	0.6637	-0.5914	yes	-	-	-	-	-	-	-	HMDB0029114	Organic acids and derivatives	Carboxylic acids and derivatives	Amino acids, peptides, and analogues	-	251.102	4.85707	M+H-H2O	C12H16N2O5	0	58.8	pos
pos_2669	1H-Indol-3-amine	metab_1843	2.77e-07	1.54e-06	1.2467	1.2422	0.6992	-0.5163	yes	C01819	-	-	-	-	-	-	HMDB0244887	Organoheterocyclic compounds	Indoles and derivatives	Indoles	-	165.102	4.01132	M+CH3OH+H	C8H8N2	0	35.1	pos
neg_5776	Gamma-Glutamylfelinylglycine	metab_13043	1.33e-05	4.52e-05	1.2467	1.2398	1.4074	0.493	yes	-	-	-	-	-	-	-	HMDB0252619	Organic acids and derivatives	Carboxylic acids and derivatives	Amino acids, peptides, and analogues	-	392.147	4.63315	M-H	C15H27N3O7S	0	53.6	neg
neg_2650	N1,N10-Dicoumaroylspermidine	metab_9585	3.99e-06	1.7e-05	1.2466	1.2552	1.348	0.4308	yes	-	-	-	-	-	-	-	HMDB0033469	Phenylpropanoids and polyketides	Cinnamic acids and derivatives	Hydroxycinnamic acids and derivatives	65715-79-9	436.224	5.176	M-H	C25H31N3O4	0	86	neg
pos_5962	N-Acetyl-L-tyrosine	metab_5464	0.0001129	0.0002449	1.2465	1.2354	0.6885	-0.5384	yes	C01657	-	-	-	-	-	-	HMDB0000866;HMDB0244966	Organic acids and derivatives	Carboxylic acids and derivatives	Amino acids, peptides, and analogues	537-55-3	256.118	4.31002	M+CH3OH+H	C11H13NO4	0	50.8	pos
neg_3391	Sphingosine 1-phosphate	metab_10403	0.004987	0.007119	1.2464	1.2474	0.6946	-0.5257	yes	C06124	-	-	map01100;map04666;map05152;map00600;map04080;map04020;map04371;map04072;map04071	Metabolic pathways;Fc gamma R-mediated phagocytosis;Tuberculosis;Sphingolipid metabolism;Neuroactive ligand-receptor interaction;Calcium signaling pathway;Apelin signaling pathway;Phospholipase D signaling pathway;Sphingolipid signaling pathway	Metabolism;Organismal Systems;Human Diseases;Metabolism;Environmental Information Processing;Environmental Information Processing;Environmental Information Processing;Environmental Information Processing;Environmental Information Processing	Global and overview maps;Immune system;Infectious disease: bacterial;Lipid metabolism;Signaling molecules and interaction;Signal transduction;Signal transduction;Signal transduction;Signal transduction	PW_C000188;HMDB0000277	Lipids and lipid-like molecules	Sphingolipids	Phosphosphingolipids	26993-30-6	424.247	6.42952	M+FA-H	C18H38NO5P	0	31.1	neg
pos_2024	Isoputreanine	metab_1135	0.001204	0.001981	1.2459	1.2604	1.4265	0.5124	yes	-	-	-	-	-	-	-	HMDB0006009	Organic acids and derivatives	Carboxylic acids and derivatives	Amino acids, peptides, and analogues	66165-33-1	343.234	2.60413	2M+Na	C7H16N2O2	0	30.9	pos
pos_2896	3,4-Methylenesebacic acid	metab_2092	4.18e-05	0.0001024	1.2454	1.2359	0.6642	-0.5902	yes	-	-	-	-	-	-	-	HMDB0059729	Lipids and lipid-like molecules	Fatty Acyls	Fatty acids and conjugates	-	244.154	4.64772	M+NH4	C12H18O4	0	60	pos
neg_1760	3-Hydroxymugineic acid	metab_8600	0.0004883	0.0008781	1.2451	1.224	0.692	-0.5312	yes	-	-	-	-	-	-	-	HMDB0033927	Organic acids and derivatives	Carboxylic acids and derivatives	Amino acids, peptides, and analogues	74235-23-7	373.063	3.74533	M+K-2H	C12H20N2O9	0	30.5	neg
pos_2765	Dihydroergotamine	metab_1949	0.0002525	0.0004947	1.2447	1.2416	1.401	0.4865	yes	C07798	-	-	-	-	-	-	HMDB0251307;HMDB0014465	Alkaloids and derivatives	Ergoline and derivatives	Lysergic acids and derivatives	6190-39-2;511-12-6	601.319	4.286	M+NH4	C33H37N5O5	0	54.6	pos
neg_7355	S-Sulfo-L-Cysteine	metab_14788	3.12e-05	9.02e-05	1.2445	1.2434	1.2744	0.3498	yes	C05824	-	-	map01100;map00270;map01230	Metabolic pathways;Cysteine and methionine metabolism;Biosynthesis of amino acids	Metabolism;Metabolism;Metabolism	Global and overview maps;Amino acid metabolism;Global and overview maps	HMDB0000731	Organic acids and derivatives	Carboxylic acids and derivatives	Amino acids, peptides, and analogues	1637-71-4	199.969	1.00085	M-H	C3H7NO5S2	88.6	0	neg
pos_150	Taurohyocholate	metab_556	1.12e-06	4.87e-06	1.2444	1.2335	1.2052	0.2693	yes	C15516	-	-	-	-	-	-	LMST05040010;HMDB0011637	Lipids and lipid-like molecules	Steroids and steroid derivatives	Bile acids, alcohols and derivatives	117997-17-8	480.278	6.0035	M+H-2H2O, M+H-H2O, M+NH4	C26H45NO7S	0	76	pos
neg_5182	Petromyzonol sulfate	metab_12386	2.24e-08	2.94e-07	1.2442	1.2439	1.3972	0.4825	yes	-	-	-	-	-	-	-	HMDB0256356	Lipids and lipid-like molecules	Steroids and steroid derivatives	Bile acids, alcohols and derivatives	-	473.262	5.5417	M-H	C24H42O7S	0	50.1	neg
neg_2117	Small bacteriocin	metab_8996	8.57e-06	3.15e-05	1.244	1.2317	1.4121	0.4978	yes	-	-	-	-	-	-	-	HMDB0033503	Organic acids and derivatives	Carboxylic acids and derivatives	Amino acids, peptides, and analogues	172617-17-3	362.175	4.21782	M+K-2H	C18H31NO4	0	35.9	neg
pos_6480	Gentamicin B	metab_6040	0.0008194	0.001407	1.2434	1.255	1.4172	0.503	yes	-	-	-	-	-	-	-	HMDB0252687	Organic oxygen compounds	Organooxygen compounds	Carbohydrates and carbohydrate conjugates	-	546.277	3.45608	M+ACN+Na	C19H38N4O10	0	41.7	pos
neg_1467	Ala Val Asp Asp	metab_8275	3.22e-10	1.24e-08	1.2431	1.2402	1.3556	0.4389	yes	-	-	-	-	-	-	-	-	-	-	-	-	417.163	3.39097	M-H	C16H26N4O9	60	0	neg
neg_2685	2-Nonene-1,4-diol	metab_9623	7.23e-09	1.25e-07	1.2431	1.2357	0.6578	-0.6042	yes	-	-	-	-	-	-	-	HMDB0245271	Lipids and lipid-like molecules	Fatty Acyls	Fatty alcohols	-	203.128	5.24413	M+FA-H	C9H18O2	0	30.6	neg
pos_6768	2-Amino-4-methylsulfanylbutanal	metab_6355	0.002659	0.004009	1.2427	1.2256	0.5756	-0.7969	yes	-	-	-	-	-	-	-	HMDB0258128	Organosulfur compounds	Thioethers	Dialkylthioethers	-	134.063	3.06492	M+H	C5H11NOS	0	45.4	pos
neg_5502	Mepenzolate	metab_12741	0.0008505	0.001445	1.2427	1.2415	1.3446	0.4271	yes	C07818	-	-	-	-	-	-	HMDB0015591	Benzenoids	Benzene and substituted derivatives	Diphenylmethanes	25990-43-6	725.385	5.07205	2M+FA-H	C21H26NO3+	0	45	neg
neg_6696	Vanillic acid	metab_14060	5.25e-08	5.82e-07	1.2425	1.2341	0.7001	-0.5144	yes	C06672	-	-	map00627;map01120	Aminobenzoate degradation;Microbial metabolism in diverse environments	Metabolism;Metabolism	Xenobiotics biodegradation and metabolism;Global and overview maps	HMDB0000484;HMDB0240266;HMDB0004815	Benzenoids	Benzene and substituted derivatives	Benzoic acids and derivatives	121-34-6;3943-74-6;499-76-3	167.034	3.55663	M-H	C8H8O4	0	65.3	neg
pos_2898	5-Acetamidovalerate	metab_2094	0.03486	0.0423	1.2417	1.2865	1.6633	0.734	yes	C03087	-	-	map01100;map00310	Metabolic pathways;Lysine degradation	Metabolism;Metabolism	Global and overview maps;Amino acid metabolism	HMDB0012175;LMFA01030987	Lipids and lipid-like molecules	Fatty Acyls	Fatty acids and conjugates	-	360.212	4.65572	2M+ACN+H	C7H13NO3	0	37.9	pos
pos_1508	Glu Ile Ser	metab_565	0.001523	0.002441	1.241	1.2428	1.3522	0.4353	yes	-	-	-	-	-	-	-	-	-	-	-	-	348.176	2.96935	M+H, M+ACN+H	C14H25N3O7	65.8	0	pos
neg_7443	Carnosine	metab_14884	2.89e-07	2.24e-06	1.24	1.239	1.378	0.4625	yes	C00386	Peptides	Peptides	map01100;map00340;map00410	Metabolic pathways;Histidine metabolism;beta-Alanine metabolism	Metabolism;Metabolism;Metabolism	Global and overview maps;Amino acid metabolism;Metabolism of other amino acids	PW_C000023;HMDB0000033;MJDBOTE0000496	Organic acids and derivatives	Peptidomimetics	Hybrid peptides	305-84-0	225.099	0.8913	M-H	C9H14N4O3	32.1	0	neg
pos_6056	N-Acetyl-a-neuraminic acid	metab_5569	9.71e-05	0.0002147	1.2399	1.232	1.6504	0.7228	yes	C19909	-	-	-	-	-	-	HMDB0000773	Organic oxygen compounds	Organooxygen compounds	Carbohydrates and carbohydrate conjugates	21646-00-4	274.092	4.12465	M+H-2H2O	C11H19NO9	0	63.5	pos
pos_1808	4-Hydroxy-L-glutamic acid	metab_7698	0.001465	0.002361	1.2396	1.25	1.3599	0.4435	yes	C05947	-	-	map01100;map00330	Metabolic pathways;Arginine and proline metabolism	Metabolism;Metabolism	Global and overview maps;Amino acid metabolism	HMDB0002273;PW_C001535	Organic acids and derivatives	Carboxylic acids and derivatives	Amino acids, peptides, and analogues	2485-33-8	205.082	0.945833	M+ACN+H	C5H9NO5	0	35.4	pos
neg_5395	Arecoline	metab_12621	2.7e-07	2.14e-06	1.2392	1.2374	0.7121	-0.4898	yes	C10129	-	-	-	-	-	-	HMDB0030353	Alkaloids and derivatives	Not Available	Not Available	63-75-2	136.076	5.2363	M-H2O-H	C8H13NO2	0	39.4	neg
neg_5184	12-oxo-PDA	metab_12388	9.6e-06	3.45e-05	1.2389	1.2413	0.6743	-0.5686	yes	C01226	-	-	map01100;map00592;map01110	Metabolic pathways;alpha-Linolenic acid metabolism;Biosynthesis of secondary metabolites	Metabolism;Metabolism;Metabolism	Global and overview maps;Lipid metabolism;Global and overview maps	HMDB0302724;LMFA02010001;HMDB0301804	Lipids and lipid-like molecules	Fatty Acyls	Eicosanoids	85551-10-6	337.202	5.5417	M+FA-H	C18H28O3	0	86.9	neg
pos_6529	3-Hydroxynona-5,7-dienoylcarnitine	metab_6092	4.56e-05	0.0001099	1.2386	1.2307	0.699	-0.5166	yes	-	-	-	-	-	-	-	HMDB0241770	Lipids and lipid-like molecules	Fatty Acyls	Fatty acid esters	-	331.222	3.38418	M+NH4	C16H27NO5	0	54.1	pos
neg_5564	Linalool oxide D 3-[apiosyl-(1->6)-glucoside]	metab_12809	9.32e-10	2.5e-08	1.2384	1.2369	1.4123	0.498	yes	-	-	-	-	-	-	-	HMDB0031367	Organic oxygen compounds	Organooxygen compounds	Carbohydrates and carbohydrate conjugates	-	463.22	4.98267	M-H	C21H36O11	0	72.5	neg
pos_1351	Taurohyocholic Acid	metab_391	1.02e-05	3.05e-05	1.2383	1.2265	1.2472	0.3187	yes	C15516	-	-	-	-	-	-	LMST05040010;HMDB0011637;MJDBDZS0000018	Lipids and lipid-like molecules	Steroids and steroid derivatives	Bile acids, alcohols and derivatives	117997-17-8	516.299	5.99563	M+H, 2M+H	C26H45NO7S	81.9	0	pos
neg_2389	Plazomicin	metab_9294	4.86e-08	5.48e-07	1.2376	1.2295	1.374	0.4584	yes	-	-	-	-	-	-	-	HMDB0256636	Organic acids and derivatives	Carboxylic acids and derivatives	Amino acids, peptides, and analogues	-	613.321	4.69113	M+Na-2H	C25H48N6O10	0	75.8	neg
neg_6491	(3R,4R,5R)-3-Fluoro-5-(hydroxymethyl)oxolane-2,3,4-triol	metab_13834	5.52e-05	0.0001424	1.237	1.2471	0.7312	-0.4517	yes	-	-	-	-	-	-	-	HMDB0257780	Organic oxygen compounds	Organooxygen compounds	Carbohydrates and carbohydrate conjugates	-	149.027	3.76948	M-H2O-H	C5H9FO5	0	48.8	neg
pos_6475	2,3-Dinor-6,15-dioxo-13,14-dihydroprostaglandin F1alpha	metab_6034	5.6e-06	1.85e-05	1.2368	1.2284	1.3397	0.4219	yes	-	-	-	-	-	-	-	HMDB0245383	Lipids and lipid-like molecules	Fatty Acyls	Eicosanoids	-	365.192	3.47208	M+Na	C18H30O6	0	59	pos
neg_2566	Stavudine	metab_9491	1.42e-05	4.77e-05	1.2365	1.2432	0.6916	-0.5321	yes	C07312	-	-	-	-	-	-	HMDB0014787;PW_C009132	Nucleosides, nucleotides, and analogues	Nucleoside and nucleotide analogues	Not Available	3056-17-5	261.029	5.03175	M+K-2H	C10H12N2O4	0	37.8	neg
pos_5618	Cromakalim	metab_5084	9.78e-08	6.91e-07	1.236	1.2268	0.7884	-0.3431	yes	C11819	-	-	-	-	-	-	HMDB0250542	Organoheterocyclic compounds	Benzopyrans	1-benzopyrans	94470-67-4	319.165	5.00975	M+CH3OH+H	C16H18N2O3	0	64.4	pos
neg_6114	Tripdiolide	metab_13419	4.05e-07	2.94e-06	1.236	1.2275	0.7609	-0.3943	yes	C09202	-	-	-	-	-	-	HMDB0259259	Organoheterocyclic compounds	Oxepanes	Not Available	38647-10-8	413.102	4.17083	M+K-2H	C20H24O7	0	50.6	neg
pos_2660	Panthenol	metab_1834	9.69e-05	0.0002141	1.236	1.22	1.4176	0.5034	yes	C05944	-	-	map00770	Pantothenate and CoA biosynthesis	Metabolism	Metabolism of cofactors and vitamins	HMDB0004231;HMDB0304820;MJDBOTE0000360	Organic oxygen compounds	Organooxygen compounds	Alcohols and polyols	81-13-0	247.165	4.00333	M+ACN+H	C9H19NO4	0	30.8	pos
neg_5240	Ancistrocladine	metab_12451	6.64e-05	0.0001651	1.2359	1.2399	1.436	0.5221	yes	C09335	-	-	-	-	-	-	HMDB0248388	Organoheterocyclic compounds	Isoquinolines and derivatives	Naphthylisoquinolines	32221-59-3	406.198	5.45648	M-H	C25H29NO4	0	39.1	neg
neg_6446	Tryptophyl-Glycine	metab_13784	0.001614	0.002557	1.2358	1.2129	1.3943	0.4795	yes	-	-	-	-	-	-	-	HMDB0029083	Organic acids and derivatives	Carboxylic acids and derivatives	Amino acids, peptides, and analogues	-	260.104	3.82435	M-H	C13H15N3O3	0	42.3	neg
neg_5520	Leucomycin	metab_12761	1.18e-05	4.09e-05	1.235	1.2365	1.382	0.4667	yes	C14064	-	-	-	-	-	-	HMDB0254035	Organic oxygen compounds	Organooxygen compounds	Carbohydrates and carbohydrate conjugates	1392-21-8	682.378	5.03957	M-H2O-H	C35H59NO13	0	76	neg
pos_88	Urothion	metab_7561	1.9e-07	1.14e-06	1.2349	1.2318	0.7795	-0.3594	yes	-	-	-	-	-	-	-	HMDB0002377	Organoheterocyclic compounds	Pteridines and derivatives	Pterins and derivatives	19295-31-9	326.037	3.32055	M+H, M+Na, M+K	C11H11N5O3S2	0	53.1	pos
neg_4329	PE(18:1(9Z)/0:0)	metab_11440	2.56e-06	1.21e-05	1.2346	1.2344	1.2617	0.3354	yes	-	-	-	-	-	-	-	LMGP02050004	-	-	-	-	478.294	6.58587	M-H	C23H46NO7P	96.5	0	neg
pos_5730	Piperundecalidine	metab_5208	4.7e-06	1.6e-05	1.2337	1.2212	0.7254	-0.4631	yes	-	-	-	-	-	-	-	HMDB0030240	Organoheterocyclic compounds	Benzodioxoles	Not Available	88660-11-1	390.202	4.77707	M+Na	C23H29NO3	0	32.1	pos
neg_6607	2-Hydroxy-3-methoxy-6beta-naltrexol	metab_13962	0.0003341	0.0006327	1.2336	1.2437	1.4667	0.5526	yes	-	-	-	-	-	-	-	HMDB0245144	Benzenoids	Phenanthrenes and derivatives	Not Available	-	394.161	3.6428	M+Na-2H	C21H27NO5	0	35.4	neg
neg_5637	Metyrapol	metab_12890	0.0001685	0.0003568	1.2328	1.2157	0.7114	-0.4912	yes	-	-	-	-	-	-	-	HMDB0060605	Organoheterocyclic compounds	Pyridines and derivatives	Not Available	-	265.075	4.87225	M+K-2H	C14H16N2O	0	41.2	neg
neg_1250	5-Deoxy-D-ribose	metab_8035	0.002692	0.004069	1.2325	1.242	1.3903	0.4754	yes	C22288	-	-	-	-	-	-	HMDB0246776	Organic oxygen compounds	Organooxygen compounds	Carbohydrates and carbohydrate conjugates	-	401.167	2.89692	3M-H	C5H10O4	0	48.9	neg
neg_6021	4-Hydroxy-4-(3-pyridyl)-butanoic acid	metab_13316	8.66e-06	3.17e-05	1.2322	1.2251	0.6997	-0.5153	yes	C19579	-	-	map05204;map00980	Chemical carcinogenesis - DNA adducts;Metabolism of xenobiotics by cytochrome P450	Human Diseases;Metabolism	Cancer: overview;Xenobiotics biodegradation and metabolism	HMDB0001119	Organoheterocyclic compounds	Pyridines and derivatives	Not Available	15569-97-8	361.14	4.28907	2M-H	C9H11NO3	0	61	neg
pos_979	Deoxycholylphenylalanine	metab_7671	6.4e-07	3.08e-06	1.2316	1.229	1.2076	0.2722	yes	-	-	-	-	-	-	-	HMDB0242413	Lipids and lipid-like molecules	Steroids and steroid derivatives	Bile acids, alcohols and derivatives	-	522.355	6.98103	M+H-H2O, M+ACN+Na	C33H49NO5	0	71.4	pos
pos_2347	Glucitol-lysine	metab_1489	8.18e-07	3.77e-06	1.2316	1.2274	1.3231	0.4039	yes	-	-	-	-	-	-	-	HMDB0252764	Organic acids and derivatives	Carboxylic acids and derivatives	Amino acids, peptides, and analogues	-	275.16	3.25738	M+H-2H2O	C12H26N2O7	0	55.3	pos
pos_892	1,2-Dihydronaphthalene-1,2-diol	metab_7575	7.58e-06	2.38e-05	1.2313	1.2336	0.7726	-0.3723	yes	C06205	-	-	map00980	Metabolism of xenobiotics by cytochrome P450	Metabolism	Xenobiotics biodegradation and metabolism	HMDB0060335	Benzenoids	Naphthalenes	Not Available	-	180.102	6.25773	M+H-H2O, M+NH4	C10H10O2	0	52.5	pos
pos_2349	PE(PGE1/DiMe(13,5))	metab_1491	7.22e-09	1.12e-07	1.2308	1.228	1.3291	0.4105	yes	-	-	-	-	-	-	-	HMDB0284951	Not Available	Not Available	Not Available	-	467.795	3.25738	M+H+Na	C49H86NO12P	0	49.4	pos
pos_1997	Ser Leu His	metab_1103	0.0005731	0.001026	1.2302	1.2335	1.3791	0.4637	yes	-	-	-	-	-	-	-	-	-	-	-	-	356.193	2.52433	M+H	C15H25N5O5	59	0	pos
neg_1581	Tryptophyl-Serine	metab_8401	0.02549	0.03136	1.2301	1.2539	1.5871	0.6664	yes	-	-	-	-	-	-	-	HMDB0029092	Organic acids and derivatives	Carboxylic acids and derivatives	Amino acids, peptides, and analogues	-	290.115	3.51745	M-H	C14H17N3O4	0	61.7	neg
pos_7134	His Leu	metab_6762	0.000762	0.001319	1.2298	1.2255	1.3184	0.3987	yes	-	-	-	-	-	-	-	-	-	-	-	-	269.161	2.636	M+H	C12H20N4O3	76	0	pos
neg_131	2-Aminoacrylic acid	metab_8101	0.0004741	0.0008567	1.2292	1.2366	1.3082	0.3875	yes	C02218	-	-	map01100;map00270	Metabolic pathways;Cysteine and methionine metabolism	Metabolism;Metabolism	Global and overview maps;Amino acid metabolism	PW_C001938;HMDB0003609	Organic acids and derivatives	Carboxylic acids and derivatives	Amino acids, peptides, and analogues	1948-56-7;28453-71-6	233.078	0.9539	2M+Hac-H, 3M-H	C3H5NO2	0	34.7	neg
neg_5163	N-Lactoylphenylalanine	metab_12365	0.000195	0.0004041	1.2291	1.2104	1.3177	0.3981	yes	-	-	-	-	-	-	-	HMDB0062175	Organic acids and derivatives	Carboxylic acids and derivatives	Amino acids, peptides, and analogues	183241-73-8	236.093	5.57748	M-H	C12H15NO4	0	57.3	neg
pos_5529	Phenylalanylvaline	metab_4986	5.38e-08	4.55e-07	1.2289	1.2208	0.7503	-0.4144	yes	-	-	-	-	-	-	-	HMDB0029008	Organic acids and derivatives	Carboxylic acids and derivatives	Amino acids, peptides, and analogues	3918-90-9	297.181	5.19377	M+CH3OH+H	C14H20N2O3	0	46.4	pos
neg_5179	Pantetheine	metab_12382	0.0005814	0.001028	1.2289	1.2336	1.6367	0.7108	yes	C00831	-	-	map01110;map00770;map00332	Biosynthesis of secondary metabolites;Pantothenate and CoA biosynthesis;Carbapenem biosynthesis	Metabolism;Metabolism;Metabolism	Global and overview maps;Metabolism of cofactors and vitamins;Biosynthesis of other secondary metabolites	PW_C001887;HMDB0003426	Organic acids and derivatives	Carboxylic acids and derivatives	Amino acids, peptides, and analogues	496-65-1	259.112	5.54952	M-H2O-H	C11H22N2O4S	0	64	neg
pos_4772	N-Myristoyl Arginine	metab_4154	3.08e-09	5.78e-08	1.2289	1.2245	0.7924	-0.3357	yes	-	-	-	-	-	-	-	HMDB0242046	Organic acids and derivatives	Carboxylic acids and derivatives	Amino acids, peptides, and analogues	-	423.274	6.26568	M+K	C20H40N4O3	0	43.7	pos
pos_758	3'-DEOXY-3'-FLUOROTHYMIDINE	metab_7247	0.002627	0.003968	1.228	1.2347	1.4172	0.503	yes	-	-	-	-	-	-	-	HMDB0246092	Nucleosides, nucleotides, and analogues	Pyrimidine nucleosides	Pyrimidine 2'',3''-dideoxyribonucleosides	-	277.118	5.23377	M+H, M+CH3OH+H	C10H13FN2O4	0	45.7	pos
pos_1222	Docosahexaenoylethanolamine	metab_248	4.51e-05	0.0001092	1.2276	1.2338	1.3202	0.4007	yes	-	-	-	-	-	-	-	HMDB0251559	Organic oxygen compounds	Organooxygen compounds	Carbohydrates and carbohydrate conjugates	-	354.278	6.28167	M+H-H2O, M+H	C24H37NO2	0	59.1	pos
pos_6793	Val Leu Thr	metab_6383	5.13e-05	0.0001216	1.2276	1.22	1.2889	0.3661	yes	-	-	-	-	-	-	-	-	-	-	-	-	332.218	3.02515	M+H	C15H29N3O5	58.2	0	pos
pos_5266	Tyrosyl-Leucine	metab_4698	2.04e-05	5.53e-05	1.2274	1.2223	0.7243	-0.4654	yes	-	-	-	-	-	-	-	HMDB0029109	Organic acids and derivatives	Carboxylic acids and derivatives	Amino acids, peptides, and analogues	-	317.149	5.75548	M+Na	C15H22N2O4	0	63.8	pos
pos_3323	Beta-Zearalanol	metab_2565	9.25e-06	2.82e-05	1.227	1.2165	0.749	-0.417	yes	C14753	-	-	-	-	-	-	-	-	-	-	42422-68-4	323.185	5.9238	M+H	C18H26O5	62.7	0	pos
pos_4099	Vignatic acid A	metab_3413	5.16e-11	3.19e-09	1.2269	1.2243	1.2809	0.3572	yes	-	-	-	-	-	-	-	HMDB0033599	Organic acids and derivatives	Carboxylic acids and derivatives	Amino acids, peptides, and analogues	181485-19-8	586.309	7.68803	M+CH3OH+H	C30H39N3O7	0	32.1	pos
pos_2849	Prolyl-Tyrosine	metab_2040	5.26e-08	4.47e-07	1.2243	1.2204	1.3833	0.4681	yes	-	-	-	-	-	-	-	HMDB0029029	Organic acids and derivatives	Carboxylic acids and derivatives	Amino acids, peptides, and analogues	-	243.113	4.51122	M+H-2H2O	C14H18N2O4	0	34.1	pos
neg_6069	Schiff base	metab_13368	7e-10	2.04e-08	1.2242	1.2218	1.3985	0.4839	yes	-	-	-	-	-	-	-	HMDB0258164	Benzenoids	Benzene and substituted derivatives	Aniline and substituted anilines	-	419.161	4.22567	M+Cl	C19H24N6O3	0	53.1	neg
pos_720	Aniracetam	metab_6835	4.88e-07	2.45e-06	1.2236	1.2219	0.7098	-0.4945	yes	C13355	-	-	-	-	-	-	HMDB0248441	Benzenoids	Benzene and substituted derivatives	Benzoic acids and derivatives	72432-10-1	237.123	4.82507	M+H, M+NH4	C12H13NO3	0	34.2	pos
neg_1557	Rutalinium	metab_8374	0.0145	0.01858	1.2234	1.2323	1.6255	0.7009	yes	-	-	-	-	-	-	-	HMDB0033348	Organoheterocyclic compounds	Quinolines and derivatives	Quinolones and derivatives	27539-40-8	325.107	3.49345	M+Cl	C16H20NO4+	0	40.1	neg
pos_159	Acetylshikonin	metab_655	2.23e-06	8.51e-06	1.2232	1.2179	0.7508	-0.4135	yes	C17413	-	-	-	-	-	-	HMDB0247936	Benzenoids	Naphthalenes	Naphthoquinones	24502-78-1	348.144	5.65148	M+NH4, M+Na, M+H-2H2O	C18H18O6	0	50.8	pos
pos_6477	Leucodopachrome	metab_6036	0.0005306	0.0009584	1.2224	1.2401	0.6642	-0.5902	yes	C05604	-	-	map01100;map00965;map00350	Metabolic pathways;Betalain biosynthesis;Tyrosine metabolism	Metabolism;Metabolism;Metabolism	Global and overview maps;Biosynthesis of other secondary metabolites;Amino acid metabolism	HMDB0004067;PW_C002044	Organoheterocyclic compounds	Indoles and derivatives	Indolecarboxylic acids and derivatives	18766-67-1	178.05	3.47208	M+H-H2O	C9H9NO4	0	46.8	pos
neg_468	12-hydroxyheptadecanoic acid	metab_11828	5.49e-05	0.0001417	1.2224	1.2138	0.7724	-0.3726	yes	-	-	-	-	-	-	-	HMDB0061663	Lipids and lipid-like molecules	Fatty Acyls	Fatty acids and conjugates	-	285.243	6.64063	M-H, M+FA-H	C17H34O3	0	54.7	neg
pos_2321	2,4-Dimethyladipic acid	metab_1461	1.08e-05	3.19e-05	1.2221	1.214	0.6768	-0.5632	yes	-	-	-	-	-	-	-	HMDB0059727	Lipids and lipid-like molecules	Fatty Acyls	Fatty acids and conjugates	-	139.075	3.2014	M+H-2H2O	C8H14O4	0	48	pos
pos_5	Imiprothrin	metab_4405	2.14e-08	2.44e-07	1.2217	1.2166	0.8108	-0.3026	yes	-	-	-	-	-	-	-	-	-	-	-	-	319.165	5.7721	M+H, M+Na, M+K, 2M+H, 2M+Na, M+H-H2O	C17H22N2O4	31.3	0	pos
pos_4316	4-alpha-Methyl-5-alpha-cholest-7-en-3-beta-ol	metab_3653	1.78e-06	7.06e-06	1.2215	1.2123	0.7491	-0.4167	yes	C08825	-	-	-	-	-	-	HMDB0246507;HMDB0011605	Lipids and lipid-like molecules	Steroids and steroid derivatives	Cholestane steroids	481-25-4	423.362	6.98103	M+Na	C28H48O	0	65.9	pos
neg_4490	3alpha,7alpha,12alpha-trihydroxy-5beta-cholestanate	metab_11619	2.39e-08	3.08e-07	1.2199	1.2171	0.789	-0.342	yes	C04722	-	-	map01100;map00120	Metabolic pathways;Primary bile acid biosynthesis	Metabolism;Metabolism	Global and overview maps;Lipid metabolism	HMDB0062207	Lipids and lipid-like molecules	Steroids and steroid derivatives	Bile acids, alcohols and derivatives	547-98-8	449.327	6.37492	M-H	C27H46O5	0	46.5	neg
pos_2036	5-Methyl-2'-o-Methylcytidine	metab_1148	5.92e-07	2.89e-06	1.2198	1.2106	0.7608	-0.3943	yes	-	-	-	-	-	-	-	-	-	-	-	-	272.124	2.636	M+H	C11H17N3O5	42.5	0	pos
pos_2673	Beta-Zearalenol	metab_7708	5.52e-05	0.0001298	1.2197	1.2085	1.3249	0.4059	yes	C14751	-	-	-	-	-	-	HMDB0041824;HMDB0041838	Phenylpropanoids and polyketides	Macrolides and analogues	Not Available	36455-72-8;71030-11-0	663.32	4.01132	2M+Na	C18H24O5	0	32.4	pos
pos_7174	Ile Asn Ser	metab_6806	0.003788	0.005515	1.2191	1.2309	1.3458	0.4284	yes	-	-	-	-	-	-	-	-	-	-	-	-	333.177	2.5483	M+H	C13H24N4O6	57.7	0	pos
pos_1687	Ala Leu Lys	metab_762	0.001972	0.003069	1.2181	1.2299	1.3598	0.4434	yes	-	-	-	-	-	-	-	-	-	-	-	-	331.234	1.60557	M+2H, M+H	C15H30N4O4	31.3	0	pos
neg_2102	N-[(3a,5b,7a,12a)-3,7-dihydroxy-24-oxo-12-(sulfooxy)cholan-24-yl]-Glycine	metab_8980	2.73e-05	8.15e-05	1.2177	1.2203	1.3948	0.48	yes	-	-	-	-	-	-	-	HMDB0002644	Lipids and lipid-like molecules	Steroids and steroid derivatives	Bile acids, alcohols and derivatives	74723-17-4	544.262	4.19432	M-H	C26H43NO9S	0	71.4	neg
pos_6515	Phenmetrazine	metab_6077	3.77e-06	1.32e-05	1.2176	1.2184	0.7094	-0.4953	yes	C07432	-	-	-	-	-	-	HMDB0014968	Organoheterocyclic compounds	Oxazinanes	Morpholines	134-49-6	195.149	3.40807	M+NH4	C11H15NO	36	0	pos
pos_5621	Gln Ile Phe	metab_5088	2.07e-05	5.59e-05	1.2171	1.2214	1.3979	0.4833	yes	-	-	-	-	-	-	-	-	-	-	-	-	407.229	5.00175	M+H	C20H30N4O5	80.6	0	pos
pos_6131	Norbolethone	metab_5653	0.002512	0.003814	1.2169	1.2026	0.6755	-0.566	yes	D05204	-	-	-	-	-	-	HMDB0006026	Lipids and lipid-like molecules	Steroids and steroid derivatives	Pregnane steroids	1235-15-0	339.228	4.00333	M+Na	C21H32O2	0	53	pos
pos_2053	Val Thr Thr	metab_1166	8.37e-06	2.59e-05	1.2165	1.2133	1.2995	0.378	yes	-	-	-	-	-	-	-	-	-	-	-	-	320.181	2.676	M+H	C13H25N3O6	74.4	0	pos
pos_5549	Xanthoxylin	metab_5008	0.0001302	0.0002773	1.2155	1.2055	1.3311	0.4126	yes	C10726	-	-	-	-	-	-	HMDB0029645	Organic oxygen compounds	Organooxygen compounds	Carbonyl compounds	90-24-4	238.107	5.15375	M+ACN+H	C10H12O4	0	38.6	pos
neg_7160	Imidazoleacetic acid ribotide	metab_14575	0.0002238	0.000453	1.2154	1.2202	0.7455	-0.4237	yes	C04437	-	-	map00340	Histidine metabolism	Metabolism	Amino acid metabolism	HMDB0006032	Nucleosides, nucleotides, and analogues	Purine nucleosides	Not Available	2888-19-9	337.044	2.65393	M-H	C10H15N2O9P	0	44.8	neg
pos_3253	9-(4-Fluoro-3-(hydroxymethyl)butyl)guanine	metab_2488	7.47e-08	5.76e-07	1.2153	1.2126	1.3831	0.4679	yes	-	-	-	-	-	-	-	HMDB0245591	Organoheterocyclic compounds	Imidazopyrimidines	Purines and purine derivatives	-	319.129	5.76348	M+ACN+Na	C10H14FN5O2	0	34.1	pos
neg_6510	Loganoside	metab_13855	0.002089	0.003219	1.2149	1.2216	1.4477	0.5337	yes	-	-	-	-	-	-	-	HMDB0247827	Lipids and lipid-like molecules	Prenol lipids	Terpene glycosides	-	389.147	3.74533	M-H	C17H26O10	0	31.8	neg
pos_5021	3-keto-Digoxigenin	metab_4431	2.04e-07	1.21e-06	1.2149	1.2088	0.782	-0.3547	yes	C07359	-	-	-	-	-	-	HMDB0060746	Organoheterocyclic compounds	Benzodiazepines	1,4-benzodiazepines	-	421.258	6.04348	M+CH3OH+H	C23H32O5	0	40.1	pos
neg_1199	Leucyl-Glutamine	metab_7977	0.0006579	0.001148	1.2148	1.2188	1.308	0.3874	yes	-	-	-	-	-	-	-	HMDB0028927	Organic acids and derivatives	Carboxylic acids and derivatives	Amino acids, peptides, and analogues	-	258.146	1.9098	M-H	C11H21N3O4	0	49.8	neg
pos_5389	Arginylphenylalaninamide	metab_4833	2.33e-06	8.84e-06	1.2143	1.2197	1.3714	0.4556	yes	-	-	-	-	-	-	-	HMDB0257190	Organic acids and derivatives	Carboxylic acids and derivatives	Amino acids, peptides, and analogues	-	303.191	5.46647	M+H-H2O	C15H24N6O2	0	40.4	pos
neg_1421	Pheophorbide a	metab_8225	0.003909	0.005694	1.214	1.2186	1.383	0.4678	yes	C18021	-	-	map01110;map00860	Biosynthesis of secondary metabolites;Porphyrin and chlorophyll metabolism	Metabolism;Metabolism	Global and overview maps;Metabolism of cofactors and vitamins	HMDB0256449	Not Available	Not Available	Not Available	15664-29-6	591.263	3.33547	M-H	C35H36N4O5	0	64.4	neg
pos_1352	4-Hydroxytetradecanedioylcarnitine	metab_392	0.0007876	0.001359	1.2139	1.1978	0.7207	-0.4725	yes	-	-	-	-	-	-	-	HMDB0241424	Lipids and lipid-like molecules	Fatty Acyls	Fatty acid esters	-	418.28	5.99563	M+H-2H2O, M+H	C21H39NO7	0	49.2	pos
neg_5121	4-[(E)-5,6-Dihydro-2,3'-bipyridin-3(4H)-ylidenemethyl]-3-methoxyphenol	metab_12319	1.31e-05	4.47e-05	1.2133	1.2117	0.7206	-0.4728	yes	-	-	-	-	-	-	-	HMDB0246319	Benzenoids	Phenols	Methoxyphenols	-	587.272	5.63922	2M-H	C18H18N2O2	0	41.6	neg
neg_6325	3-Hydroxydodeca-7,10-dienoylcarnitine	metab_13650	0.0001205	0.0002713	1.2131	1.2053	1.349	0.4319	yes	-	-	-	-	-	-	-	HMDB0241249	Lipids and lipid-like molecules	Fatty Acyls	Fatty acid esters	-	392.183	3.93453	M+K-2H	C19H33NO5	0	48.6	neg
neg_2376	H-D-Asp(OtBu)-OH	metab_9281	0.0001388	0.000304	1.213	1.2	0.6673	-0.5836	yes	-	-	-	-	-	-	-	HMDB0253009	Organic acids and derivatives	Carboxylic acids and derivatives	Amino acids, peptides, and analogues	-	170.081	4.66703	M-H2O-H	C8H15NO4	0	54.4	neg
pos_4693	Cardanolmonoene	metab_4066	0.001229	0.002016	1.2129	1.1957	0.7694	-0.3782	yes	-	-	-	-	-	-	-	HMDB0030482	Benzenoids	Phenols	1-hydroxy-4-unsubstituted benzenoids	501-26-8	325.252	6.35318	M+Na	C21H34O	0	75.5	pos
pos_7149	Val Ala Thr	metab_6778	7.36e-05	0.0001671	1.2126	1.2102	1.2904	0.3678	yes	-	-	-	-	-	-	-	-	-	-	-	-	290.171	2.60413	M+H	C12H23N3O5	60.3	0	pos
pos_5809	Sibrafiban	metab_5294	0.002655	0.004006	1.2126	1.2382	1.483	0.5686	yes	-	-	-	-	-	-	-	HMDB0258287	Benzenoids	Benzene and substituted derivatives	Benzoic acids and derivatives	-	403.197	4.59972	M+H-H2O	C20H28N4O6	0	69.7	pos
pos_5384	Petasitenine	metab_4828	6.8e-07	3.22e-06	1.2122	1.2139	0.7579	-0.3999	yes	C10359	-	-	-	-	-	-	HMDB0030328	Organoheterocyclic compounds	Azaspirodecane derivatives	Not Available	60102-37-6	445.196	5.47447	M+ACN+Na	C19H27NO7	0	80.8	pos
pos_7216	Lysylisoleucine	metab_6851	8.1e-09	1.22e-07	1.2117	1.2091	1.4571	0.5431	yes	-	-	-	-	-	-	-	HMDB0028954;HMDB0028955	Organic acids and derivatives	Carboxylic acids and derivatives	Amino acids, peptides, and analogues	7369-79-1;20556-13-2	130.602	2.3731	M+2H	C12H25N3O3	0	43.7	pos
neg_6113	4-(4-Fluorophenyl)piperidin-4-ol	metab_13418	1.63e-05	5.3e-05	1.2116	1.2039	1.4344	0.5205	yes	-	-	-	-	-	-	-	HMDB0246291	Organoheterocyclic compounds	Piperidines	Phenylpiperidines	-	435.209	4.17083	2M+FA-H	C11H14FNO	0	50.1	neg
pos_4867	16a-Hydroxydehydroisoandrosterone	metab_4258	3.71e-06	1.31e-05	1.211	1.2045	0.7462	-0.4225	yes	C05139	-	-	map00140	Steroid hormone biosynthesis	Metabolism	Lipid metabolism	HMDB0000352	Lipids and lipid-like molecules	Steroids and steroid derivatives	Androstane steroids	1232-73-1	327.191	6.17085	M+Na	C19H28O3	0	36.7	pos
neg_7098	Leucyl-Lysine	metab_14506	1.77e-08	2.47e-07	1.2105	1.2059	1.4674	0.5533	yes	-	-	-	-	-	-	-	HMDB0028934	Organic acids and derivatives	Carboxylic acids and derivatives	Amino acids, peptides, and analogues	-	258.182	3.18613	M-H	C12H25N3O3	0	35.2	neg
pos_6918	Hydroxyzine	metab_6521	5.23e-05	0.0001236	1.2105	1.1959	1.3148	0.3949	yes	C07045	-	-	-	-	-	-	PW_C009051;HMDB0014697	Benzenoids	Benzene and substituted derivatives	Diphenylmethanes	68-88-2	416.214	2.86583	M+ACN+H	C21H27ClN2O2	0	30.3	pos
pos_6000	Lotaustralin	metab_5508	9.41e-06	2.86e-05	1.2103	1.2013	0.7285	-0.457	yes	C08334	-	-	map00460;map01110	Cyanoamino acid metabolism;Biosynthesis of secondary metabolites	Metabolism;Metabolism	Metabolism of other amino acids;Global and overview maps	HMDB0033865	Organic oxygen compounds	Organooxygen compounds	Carbohydrates and carbohydrate conjugates	534-67-8	226.107	4.24533	M+H-2H2O	C11H19NO6	0	33.7	pos
neg_3060	Vulgarin	metab_10038	1.33e-05	4.51e-05	1.2102	1.2097	0.7249	-0.4641	yes	C09600	-	-	-	-	-	-	HMDB0036130	Lipids and lipid-like molecules	Prenol lipids	Terpene lactones	3162-56-9	285.113	5.89217	M+Na-2H	C15H20O4	0	57.8	neg
pos_744	4-[(2,4-Dihydroxy-3,3-dimethylbutanoyl)amino]butanoic acid	metab_7094	3.68e-08	3.47e-07	1.2102	1.207	0.7759	-0.366	yes	-	-	-	-	-	-	-	HMDB0246316	Organic acids and derivatives	Carboxylic acids and derivatives	Amino acids, peptides, and analogues	-	198.112	5.06575	M+H-2H2O, M+CH3OH+H	C10H19NO5	0	70.5	pos
pos_6657	Ethyladipic acid	metab_6233	2.47e-07	1.41e-06	1.2101	1.201	0.6994	-0.5158	yes	-	-	-	-	-	-	-	HMDB0002023;LMFA01170104	Lipids and lipid-like molecules	Fatty Acyls	Fatty acids and conjugates	22935-13-3	157.086	3.20938	M+H-H2O	C8H14O4	0	41.3	pos
pos_3080	N1,N5,N10-Tris-trans-p-coumaroylspermine	metab_2298	1.88e-05	5.17e-05	1.2096	1.1971	1.3572	0.4407	yes	-	-	-	-	-	-	-	HMDB0039962	Phenylpropanoids and polyketides	Cinnamic acids and derivatives	Hydroxycinnamic acids and derivatives	-	623.319	5.21777	M+H-H2O	C37H44N4O6	0	49.9	pos
pos_3035	N-Methylschinifoline	metab_2248	3e-06	1.09e-05	1.2095	1.205	0.7285	-0.457	yes	-	-	-	-	-	-	-	HMDB0040381	Organoheterocyclic compounds	Quinolines and derivatives	Quinolones and derivatives	149998-43-6	273.16	5.07375	M+NH4	C16H17NO2	0	36	pos
pos_1877	N-Ribosylhistidine	metab_970	2.25e-05	6e-05	1.2095	1.2114	1.3798	0.4645	yes	-	-	-	-	-	-	-	HMDB0002089	Organic acids and derivatives	Carboxylic acids and derivatives	Amino acids, peptides, and analogues	98379-91-0	320.145	1.39013	M+CH3OH+H	C11H17N3O6	0	75.7	pos
pos_5226	L-3-Phenyllactic acid	metab_4654	0.0006498	0.001146	1.2094	1.2394	1.4258	0.5118	yes	C05607	-	-	map01100;map00960;map00360;map01064	Metabolic pathways;Tropane, piperidine and pyridine alkaloid biosynthesis;Phenylalanine metabolism;Biosynthesis of alkaloids derived from ornithine, lysine and nicotinic acid	Metabolism;Metabolism;Metabolism;Metabolism	Global and overview maps;Biosynthesis of other secondary metabolites;Amino acid metabolism;Chemical structure transformation maps	HMDB0000748;HMDB0000563	Phenylpropanoids and polyketides	Phenylpropanoic acids	Not Available	20312-36-1;7326-19-4	350.16	5.81998	2M+NH4	C9H10O3	0	39.3	pos
pos_4457	Biolimus A9	metab_3808	7.36e-10	2.11e-08	1.2092	1.2064	1.2744	0.3499	yes	-	-	-	-	-	-	-	HMDB0249224	Phenylpropanoids and polyketides	Macrolide lactams	Not Available	-	950.608	6.71083	M+H-2H2O	C55H87NO14	0	92.5	pos
neg_6939	Neoacrimarine K	metab_14329	0.005254	0.00745	1.2076	1.2249	0.6349	-0.6555	yes	-	-	-	-	-	-	-	HMDB0033192	Organoheterocyclic compounds	Quinolines and derivatives	Benzoquinolines	217199-09-2	540.168	3.32765	M-H2O-H	C31H29NO9	0	75.3	neg
neg_5051	Tetrahydrodeoxycortisol	metab_12241	3.53e-05	9.95e-05	1.2075	1.2099	0.6925	-0.5301	yes	C14594	-	-	-	-	-	-	LMST05030014;HMDB0005972	Lipids and lipid-like molecules	Steroids and steroid derivatives	Hydroxysteroids	68-60-0	395.244	5.74655	M+FA-H	C21H34O4	0	55.1	neg
pos_5511	1-Heptadecanoylglycerophosphoethanolamine	metab_4967	0.0007714	0.001333	1.2072	1.2198	0.6758	-0.5653	yes	-	-	-	-	-	-	-	HMDB0061691	Lipids and lipid-like molecules	Glycerophospholipids	Glycerophosphoethanolamines	-	490.291	5.22577	M+Na	C22H46NO7P	0	48.1	pos
neg_2577	DG(20:4(6E,8Z,11Z,13E)-2OH(5S,15S)/2:0/0:0)	metab_9503	4.58e-06	1.9e-05	1.2071	1.2052	1.3431	0.4256	yes	-	-	-	-	-	-	-	HMDB0297000	Not Available	Not Available	Not Available	-	497.273	5.05525	M+FA-H	C25H40O7	0	49.5	neg
pos_985	LysoPC(20:2(11Z,14Z)/0:0)	metab_7678	1.14e-05	3.34e-05	1.207	1.2075	1.2628	0.3366	yes	C04230	Lipids	Phospholipids	map00564;map05231	Glycerophospholipid metabolism;Choline metabolism in cancer	Metabolism;Human Diseases	Lipid metabolism;Cancer: overview	HMDB0010392	Lipids and lipid-like molecules	Glycerophospholipids	Glycerophosphocholines	-	548.371	7.06023	M+H, M+Na	C28H54NO7P	0	80.8	pos
neg_5855	Suberylglycine	metab_13131	3.07e-05	8.92e-05	1.2064	1.1984	0.701	-0.5125	yes	-	-	-	-	-	-	-	HMDB0000953	Organic acids and derivatives	Carboxylic acids and derivatives	Amino acids, peptides, and analogues	60317-54-6	230.103	4.52827	M-H	C10H17NO5	0	46.3	neg
neg_3419	LysoPE(0:0/18:2(9Z,12Z))	metab_10434	0.0001221	0.000274	1.2063	1.1942	1.2502	0.3222	yes	-	-	-	-	-	-	-	HMDB0011477	Lipids and lipid-like molecules	Glycerophospholipids	Glycerophosphoethanolamines	-	476.278	6.47633	M-H	C23H44NO7P	0	57.3	neg
pos_6052	Gamma-Glutamyltryptophan	metab_5565	0.0001374	0.0002909	1.2061	1.1918	1.2828	0.3593	yes	-	-	-	-	-	-	-	HMDB0252908;HMDB0029160	Organic acids and derivatives	Carboxylic acids and derivatives	Amino acids, peptides, and analogues	66471-20-3	334.14	4.13265	M+H	C16H19N3O5	0	62.3	pos
pos_5175	Isogingerenone B	metab_4598	1.34e-06	5.55e-06	1.206	1.2082	1.3567	0.4401	yes	-	-	-	-	-	-	-	HMDB0035404	Phenylpropanoids and polyketides	Diarylheptanoids	Linear diarylheptanoids	128700-99-2	428.21	5.8998	M+ACN+H	C22H26O6	0	39.2	pos
neg_1519	L-Hexahydro-3-imino-1,2,4-oxadiazepine-3-carboxylic acid	metab_8333	0.003301	0.004879	1.2055	1.2188	1.4104	0.4961	yes	-	-	-	-	-	-	-	HMDB0030402	Organic acids and derivatives	Carboxylic acids and derivatives	Amino acids, peptides, and analogues	21539-44-6	476.182	3.44643	3M-H	C5H9N3O3	0	63.3	neg
neg_2561	4-Hydroxy-3,6,9-Trimethyl-3,3a,4,5,9a,9b-hexahydroazuleno[4,5-b]furan-2,7-Dione	metab_9486	3.46e-07	2.58e-06	1.2054	1.1987	0.7541	-0.4071	yes	-	-	-	-	-	-	-	-	-	-	-	-	243.102	5.0239	M-H2O-H	C15H18O4	53.9	0	neg
pos_1438	Cytidine 2'-phosphate	metab_487	1.15e-05	3.38e-05	1.2052	1.2029	0.7337	-0.4468	yes	C03104	-	-	-	-	-	-	HMDB0011692	Organic oxygen compounds	Organooxygen compounds	Carbohydrates and carbohydrate conjugates	85-94-9	306.047	3.99532	M+H-H2O, M+H	C9H14N3O8P	0	38.2	pos
neg_6431	Ala-phe	metab_13768	1.6e-07	1.46e-06	1.205	1.198	1.28	0.3561	yes	-	-	-	-	-	-	-	HMDB0028694	Organic acids and derivatives	Carboxylic acids and derivatives	Amino acids, peptides, and analogues	3061-90-3	235.108	3.84	M-H	C12H16N2O3	89.5	0	neg
pos_4085	PC(P-18:0/0:0)	metab_3398	0.0001054	0.0002306	1.2047	1.2108	1.3423	0.4247	yes	C04230	Lipids	Phospholipids	map00564;map05231	Glycerophospholipid metabolism;Choline metabolism in cancer	Metabolism;Human Diseases	Lipid metabolism;Cancer: overview	HMDB0013122;LMGP01070009	Lipids and lipid-like molecules	Glycerophospholipids	Glycerophosphocholines	-	530.358	7.71195	M+Na	C26H54NO6P	73.2	0	pos
neg_6880	Beta-D-3-Ribofuranosyluric acid	metab_14264	0.0001272	0.000283	1.2044	1.2145	1.3667	0.4507	yes	C05513	-	-	map01100;map00230	Metabolic pathways;Purine metabolism	Metabolism;Metabolism	Global and overview maps;Nucleotide metabolism	HMDB0029920	Organoheterocyclic compounds	Imidazopyrimidines	Purines and purine derivatives	2124-54-1	299.063	3.3753	M-H	C10H12N4O7	0	42.7	neg
neg_3502	N-Stearoyl Threonine	metab_10526	2.18e-07	1.82e-06	1.2043	1.2029	1.3453	0.4279	yes	-	-	-	-	-	-	-	HMDB0241950	Organic acids and derivatives	Carboxylic acids and derivatives	Amino acids, peptides, and analogues	-	366.301	6.6328	M-H2O-H	C22H43NO4	0	50.8	neg
pos_5176	Integerrimine	metab_4599	1.86e-05	5.11e-05	1.2038	1.2029	0.7199	-0.4742	yes	C10328	-	-	-	-	-	-	HMDB0242680	Phenylpropanoids and polyketides	Macrolides and analogues	Not Available	480-79-5	399.191	5.8998	M+ACN+Na	C18H25NO5	0	86.4	pos
pos_3496	Stercobilin	metab_2753	0.0002317	0.0004581	1.2034	1.211	0.7863	-0.3468	yes	C05793	-	-	map00860	Porphyrin and chlorophyll metabolism	Metabolism	Metabolism of cofactors and vitamins	HMDB0240259	Organoheterocyclic compounds	Tetrapyrroles and derivatives	Bilirubins	34217-90-8	595.348	6.26568	M+H	C33H46N4O6	63.8	0	pos
pos_7492	Thiomorpholine 3-carboxylate	metab_7150	6.28e-05	0.0001453	1.2033	1.1933	0.7248	-0.4643	yes	C03901	-	-	-	-	-	-	HMDB0059611	Organic acids and derivatives	Carboxylic acids and derivatives	Amino acids, peptides, and analogues	20960-92-3	148.043	0.906667	M+H	C5H9NO2S	0	39.5	pos
pos_3598	Dehydrovomifoliol	metab_7709	2.59e-06	9.66e-06	1.2031	1.1977	0.773	-0.3714	yes	C02533	-	-	-	-	-	-	HMDB0036819;LMPR0103050009;HMDB0302822	Lipids and lipid-like molecules	Prenol lipids	Sesquiterpenoids	15764-81-5	205.122	6.63155	M+H-H2O	C13H18O3	0	74.3	pos
neg_6818	Marmesin rhamnoside	metab_14195	1.75e-05	5.61e-05	1.203	1.1944	0.7141	-0.4858	yes	-	-	-	-	-	-	-	HMDB0039564	Phenylpropanoids and polyketides	Coumarins and derivatives	Furanocoumarins	142347-99-7	429.097	3.43075	M+K-2H	C20H24O8	0	40.1	neg
pos_6855	P-Aminobenzoic acid	metab_7745	0.0004929	0.0008995	1.2029	1.1925	1.3446	0.4272	yes	C07527	-	-	-	-	-	-	HMDB0004992;HMDB0001392;HMDB0304171	Benzenoids	Benzene and substituted derivatives	Benzoic acids and derivatives	150-13-0;94-09-7	292.129	2.93752	2M+NH4	C7H7NO2	0	42.9	pos
neg_3037	2-(4-Methylphenoxy)-7-(4-chlorophenyl)heptanoic acid	metab_10012	2.9e-06	1.34e-05	1.2021	1.2074	1.4126	0.4984	yes	-	-	-	-	-	-	-	HMDB0244635	Benzenoids	Benzene and substituted derivatives	Phenoxyacetic acid derivatives	-	381.101	5.86867	M+Cl	C20H23ClO3	0	37.6	neg
neg_5915	Estrone-2,3-quinone	metab_13198	3.47e-05	9.83e-05	1.2019	1.1985	1.4303	0.5163	yes	-	-	-	-	-	-	-	HMDB0012941	Lipids and lipid-like molecules	Steroids and steroid derivatives	Estrane steroids	40551-33-5	305.117	4.4443	M+Na-2H	C18H20O3	0	46.2	neg
neg_5415	5,8-Dihydroxy-3-(4-hydroxybenzyl)-7-methoxy-4-chromanone 8-acetate	metab_12644	0.0005624	0.0009965	1.2014	1.209	0.6854	-0.545	yes	-	-	-	-	-	-	-	HMDB0037252	Phenylpropanoids and polyketides	Homoisoflavonoids	Homoisoflavans	99877-75-5	339.088	5.20687	M-H2O-H	C19H18O7	0	51.6	neg
neg_2641	O-Tyrosine	metab_9575	5.61e-08	6.12e-07	1.2009	1.2	0.7688	-0.3792	yes	-	-	-	-	-	-	-	HMDB0006050	Organic acids and derivatives	Carboxylic acids and derivatives	Amino acids, peptides, and analogues	2370-61-8	361.141	5.1618	2M-H	C9H11NO3	0	47.1	neg
neg_1055	N-(Hydroxymethyl)acrylamide	metab_7819	3.27e-05	9.36e-05	1.2008	1.1998	1.2768	0.3526	yes	C19456	-	-	-	-	-	-	HMDB0255023	Organic acids and derivatives	Carboxylic acids and derivatives	Acrylic acids and derivatives	924-42-5	247.093	0.961717	2M+FA-H	C4H7NO2	0	46.4	neg
pos_5528	Scopolamine	metab_4985	5.34e-09	8.79e-08	1.1999	1.197	0.7559	-0.4037	yes	C01851	-	-	map01100;map00960;map01064;map01110	Metabolic pathways;Tropane, piperidine and pyridine alkaloid biosynthesis;Biosynthesis of alkaloids derived from ornithine, lysine and nicotinic acid;Biosynthesis of secondary metabolites	Metabolism;Metabolism;Metabolism;Metabolism	Global and overview maps;Biosynthesis of other secondary metabolites;Chemical structure transformation maps;Global and overview maps	HMDB0003573;MJDBOTE0001028	Organic acids and derivatives	Hydroxy acids and derivatives	Beta hydroxy acids and derivatives	51-34-3	321.18	5.19377	M+NH4	C17H21NO4	0	57.1	pos
pos_4801	N-Dodecylsarcosinate	metab_4187	6.19e-06	2.01e-05	1.1998	1.1957	0.766	-0.3846	yes	-	-	-	-	-	-	-	HMDB0255129	Organic acids and derivatives	Carboxylic acids and derivatives	Amino acids, peptides, and analogues	-	290.269	6.24203	M+CH3OH+H	C15H31NO2	0	45.2	pos
pos_5519	PI(TXB2/18:1(9Z))	metab_4975	9.78e-07	4.38e-06	1.1997	1.1951	1.3362	0.4181	yes	-	-	-	-	-	-	-	HMDB0276587	Not Available	Not Available	Not Available	-	498.256	5.20977	M+2Na	C47H83O17P	0	58.6	pos
pos_120	Deoxycholyl-L-dopa	metab_223	0.0004738	0.0008676	1.1997	1.1918	1.246	0.3173	yes	-	-	-	-	-	-	-	HMDB0242439	Not Available	Not Available	Not Available	-	572.358	6.27367	M+H-2H2O, M+H, M+H-H2O	C33H49NO7	0	47.9	pos
pos_5242	Tobramycin	metab_4672	0.0001899	0.0003858	1.1994	1.1904	0.7461	-0.4226	yes	C00397	-	-	map01110;map00524	Biosynthesis of secondary metabolites;Neomycin, kanamycin and gentamicin biosynthesis	Metabolism;Metabolism	Global and overview maps;Biosynthesis of other secondary metabolites	PW_C009161;HMDB0014822	Organic oxygen compounds	Organooxygen compounds	Carbohydrates and carbohydrate conjugates	32986-56-4	432.249	5.78803	M+H-2H2O	C18H37N5O9	0	56.6	pos
pos_7511	L-erythro-4-Hydroxyarginine	metab_7172	0.02577	0.03207	1.1993	1.2368	1.4497	0.5357	yes	C08284	-	-	-	-	-	-	HMDB0034326	Organic acids and derivatives	Carboxylic acids and derivatives	Amino acids, peptides, and analogues	61370-10-3	232.14	0.882883	M+ACN+H	C6H14N4O3	0	60.6	pos
neg_6161	N-(1-Carboxy-3-carboxanilidopropyl)alanylproline	metab_13471	3.84e-05	0.0001069	1.1988	1.1971	1.3603	0.444	yes	-	-	-	-	-	-	-	HMDB0257086	Organic acids and derivatives	Carboxylic acids and derivatives	Amino acids, peptides, and analogues	-	390.167	4.11602	M-H	C19H25N3O6	0	60.4	neg
pos_5476	Val Leu Phe	metab_4928	0.005452	0.007704	1.1984	1.2154	1.4556	0.5417	yes	-	-	-	-	-	-	-	-	-	-	-	-	378.238	5.29777	M+H	C20H31N3O4	58.6	0	pos
neg_2939	Isoleucyl-Phenylalanine	metab_9904	7.02e-07	4.49e-06	1.1981	1.1969	0.7532	-0.4089	yes	-	-	-	-	-	-	-	HMDB0028914	Organic acids and derivatives	Carboxylic acids and derivatives	Amino acids, peptides, and analogues	-	323.161	5.68528	M+FA-H	C15H22N2O3	0	31.6	neg
neg_3595	Sorbitan oleate	metab_10628	0.0007351	0.001271	1.1978	1.2087	1.3126	0.3925	yes	-	-	-	-	-	-	-	LMFA07011018;HMDB0029886;HMDB0248603	Lipids and lipid-like molecules	Fatty Acyls	Fatty acid esters	1338-43-8	463.283	6.85155	M+Cl	C24H44O6	0	70.3	neg
neg_4834	2-Heptenoic acid	metab_12000	2.19e-07	1.82e-06	1.1975	1.1905	0.7577	-0.4004	yes	-	-	-	-	-	-	-	LMFA01030012;HMDB0031484	Lipids and lipid-like molecules	Fatty Acyls	Fatty acids and conjugates	18999-28-5	301.166	5.94705	2M+FA-H	C7H12O2	0	31.7	neg
pos_2001	Tyrosyl-Glutamate	metab_1110	0.0002421	0.0004766	1.1973	1.1994	1.2748	0.3503	yes	-	-	-	-	-	-	-	HMDB0029104	Organic acids and derivatives	Carboxylic acids and derivatives	Amino acids, peptides, and analogues	-	311.124	2.53232	M+H	C14H18N2O6	0	85.8	pos
pos_3808	Epsilon-Tocopherol	metab_3091	0.0007334	0.001275	1.1968	1.1944	0.7681	-0.3805	yes	C14154	-	-	map01100;map00130;map01110	Metabolic pathways;Ubiquinone and other terpenoid-quinone biosynthesis;Biosynthesis of secondary metabolites	Metabolism;Metabolism;Metabolism	Global and overview maps;Metabolism of cofactors and vitamins;Global and overview maps	HMDB0304597;HMDB0030554;LMPR02020055	Lipids and lipid-like molecules	Prenol lipids	Quinone and hydroquinone lipids	490-23-3	393.314	7.56098	M+H-H2O	C28H42O2	0	84.3	pos
neg_5868	Deltorphin II	metab_13145	5.03e-09	9.48e-08	1.1965	1.1928	1.3322	0.4139	yes	C18095	-	-	map07224	Opioid receptor agonists/antagonists	Drug Development	Target-based classification: G protein-coupled receptors	HMDB0250987	Organic acids and derivatives	Carboxylic acids and derivatives	Amino acids, peptides, and analogues	122752-16-3	819.352	4.50858	M+K-2H	C38H54N8O10	0	56.6	neg
pos_414	Ile His Glu	metab_3458	0.0002158	0.00043	1.1964	1.1955	1.3112	0.3909	yes	-	-	-	-	-	-	-	-	-	-	-	-	398.203	2.57222	M+2H, M+H	C17H27N5O6	82.1	0	pos
pos_2226	Aceneuramic acid	metab_1356	1.87e-05	5.13e-05	1.1963	1.1974	1.4444	0.5304	yes	C19910	-	-	-	-	-	-	HMDB0000230;HMDB0259583	Organic oxygen compounds	Organooxygen compounds	Carbohydrates and carbohydrate conjugates	19342-33-7	274.092	3.01718	M+H-2H2O	C11H19NO9	0	34.4	pos
pos_6703	Epsilon-Maleimido-lysine	metab_6285	4.05e-08	3.74e-07	1.1962	1.1887	0.7385	-0.4374	yes	-	-	-	-	-	-	-	HMDB0251891	Organic acids and derivatives	Carboxylic acids and derivatives	Amino acids, peptides, and analogues	-	206.092	3.14508	M+H-2H2O	C10H15N3O4	0	49.8	pos
pos_6814	Isopentyl gentiobioside	metab_6407	0.0003392	0.0006444	1.1959	1.1965	1.3068	0.386	yes	-	-	-	-	-	-	-	HMDB0041512	Lipids and lipid-like molecules	Fatty Acyls	Fatty acyl glycosides	178275-89-3	445.229	2.99335	M+CH3OH+H	C17H32O11	0	38.1	pos
neg_4357	Jervine	metab_11471	3.7e-06	1.62e-05	1.1956	1.2003	1.32	0.4006	yes	C10811	-	-	map01066	Biosynthesis of alkaloids derived from terpenoid and polyketide	Metabolism	Chemical structure transformation maps	HMDB0253731;MJDBOTE0000999	Lipids and lipid-like molecules	Steroids and steroid derivatives	Steroidal alkaloids	469-59-0	424.286	6.54675	M-H	C27H39NO3	0	32.5	neg
neg_2114	8-Hydroxy-5,6-octadienoic acid	metab_8993	0.0001603	0.000343	1.1956	1.1814	0.7161	-0.4818	yes	-	-	-	-	-	-	-	HMDB0031101;LMFA01031076	Organic acids and derivatives	Hydroxy acids and derivatives	Medium-chain hydroxy acids and derivatives	-	201.076	4.21782	M+FA-H	C8H12O3	0	73.5	neg
pos_2450	Avemectin B1	metab_1603	5.19e-05	0.0001227	1.1951	1.1885	1.3289	0.4103	yes	-	-	-	-	-	-	-	HMDB0254790	Phenylpropanoids and polyketides	Macrolides and analogues	Not Available	-	444.259	3.5041	M+2H	C49H74O14	0	51.2	pos
pos_495	Asp Leu	metab_4350	1.96e-05	5.34e-05	1.1949	1.1942	1.2584	0.3316	yes	-	-	-	-	-	-	-	-	-	-	-	-	247.129	3.08888	M+H, M+Na	C10H18N2O5	89.6	0	pos
pos_6554	Asn Phe	metab_6120	0.002214	0.003409	1.1942	1.2061	1.3668	0.4508	yes	-	-	-	-	-	-	-	-	-	-	-	-	280.129	3.35237	M+H	C13H17N3O4	68.9	0	pos
neg_3755	L-a-Lysophosphatidylserine	metab_10804	1.94e-05	6.11e-05	1.194	1.1955	1.306	0.3852	yes	-	-	-	-	-	-	-	-	-	-	-	-	524.299	7.56232	M-H	C24H48NO9P	93.8	0	neg
pos_5313	Alanylleucine	metab_4750	3.52e-05	8.83e-05	1.1932	1.1877	0.7298	-0.4545	yes	-	-	-	-	-	-	-	HMDB0251509;HMDB0028691	Organic acids and derivatives	Carboxylic acids and derivatives	Amino acids, peptides, and analogues	3303-34-2	427.255	5.65148	2M+Na	C9H18N2O3	0	37.4	pos
pos_5150	Norhydromorphone	metab_4571	2e-05	5.45e-05	1.1928	1.1818	0.736	-0.4423	yes	-	-	-	-	-	-	-	HMDB0014004	Alkaloids and derivatives	Morphinans	Not Available	-	289.154	5.93182	M+NH4	C16H17NO3	0	33.1	pos
neg_7367	Ala-Ala-Ala	metab_14800	0.0004922	0.0008847	1.1928	1.1941	1.4009	0.4864	yes	-	-	-	-	-	-	-	HMDB0248092	Organic acids and derivatives	Carboxylic acids and derivatives	Amino acids, peptides, and analogues	-	230.114	0.977367	M-H	C9H17N3O4	0	50.4	neg
pos_6086	N-[(2Z)-2-Methoxyiminopropyl]-7H-purin-6-amine	metab_5602	0.003879	0.005629	1.1923	1.2012	1.5572	0.639	yes	-	-	-	-	-	-	-	HMDB0258951	Organoheterocyclic compounds	Imidazopyrimidines	Purines and purine derivatives	-	203.103	4.07595	M+H-H2O	C9H12N6O	0	35.6	pos
neg_6912	Didanosine	metab_14300	1.12e-05	3.93e-05	1.192	1.1999	1.3349	0.4167	yes	C06953	-	-	-	-	-	-	PW_C009350;HMDB0015037	Nucleosides, nucleotides, and analogues	Purine nucleosides	Purine 2'',3''-dideoxyribonucleosides	69655-05-6	281.089	3.34393	M+FA-H	C10H12N4O3	59.3	0	neg
neg_2333	Betamethasone	metab_9235	0.005106	0.00727	1.192	1.2016	1.3978	0.4832	yes	C06848	-	-	-	-	-	-	HMDB0014586;MJDBOTE0001387	Lipids and lipid-like molecules	Steroids and steroid derivatives	Hydroxysteroids	378-44-9	427.172	4.59687	M+Cl	C22H29FO5	0	55.3	neg
pos_5438	Gly Trp Leu	metab_4888	0.009819	0.0132	1.1915	1.2008	1.4854	0.5708	yes	-	-	-	-	-	-	-	-	-	-	-	-	375.202	5.3624	M+H	C19H26N4O4	55.2	0	pos
pos_4935	Beta-Estradiol 17-propionate	metab_4334	6.91e-05	0.0001577	1.1912	1.1895	1.3765	0.461	yes	-	-	-	-	-	-	-	HMDB0251965	Lipids and lipid-like molecules	Steroids and steroid derivatives	Steroid esters	-	351.191	6.10727	M+Na	C21H28O3	0	31.4	pos
neg_1450	Arginyltryptophan	metab_8257	1.72e-05	5.55e-05	1.191	1.1851	1.3361	0.418	yes	-	-	-	-	-	-	-	HMDB0028720	Organic acids and derivatives	Carboxylic acids and derivatives	Amino acids, peptides, and analogues	25615-38-7	381.163	3.36742	M+Na-2H	C17H24N6O3	0	37	neg
neg_6693	Glutaminyltryptophan	metab_14057	0.0002542	0.0005035	1.191	1.1867	1.3393	0.4215	yes	-	-	-	-	-	-	-	HMDB0028808	Organic acids and derivatives	Carboxylic acids and derivatives	Amino acids, peptides, and analogues	66851-83-0	331.141	3.55663	M-H	C16H20N4O4	0	43.6	neg
pos_6256	Ethinamate	metab_5791	2.54e-08	2.71e-07	1.1907	1.1883	0.7771	-0.3639	yes	C07832	-	-	-	-	-	-	HMDB0015165	Organic oxygen compounds	Organooxygen compounds	Carbonyl compounds	126-52-3	185.129	3.80997	M+NH4	C9H13NO2	0	35.1	pos
neg_1418	Naloxone	metab_8221	0.01466	0.01875	1.1905	1.2181	1.4717	0.5575	yes	C07252	-	-	-	-	-	-	HMDB0015314;PW_C009596	Benzenoids	Phenanthrenes and derivatives	Not Available	465-65-6	348.123	3.33547	M+Na-2H	C19H21NO4	0	40.1	neg
neg_7022	LysoPE(14:1(9Z)/0:0)	metab_14423	3.72e-06	1.62e-05	1.1904	1.1842	1.3098	0.3893	yes	-	-	-	-	-	-	-	HMDB0011501	Lipids and lipid-like molecules	Glycerophospholipids	Glycerophosphoethanolamines	-	444.21	3.25658	M+Na-2H	C19H38NO7P	0	53	neg
pos_6528	Ile Leu Glu	metab_6091	0.0001123	0.0002436	1.19	1.1922	1.3319	0.4135	yes	-	-	-	-	-	-	-	-	-	-	-	-	374.228	3.38418	M+H	C17H31N3O6	79.7	0	pos
pos_7398	Asp Thr Ala	metab_7048	0.0006649	0.001168	1.1891	1.1952	1.3519	0.435	yes	-	-	-	-	-	-	-	-	-	-	-	-	306.129	1.20687	M+H	C11H19N3O7	68.8	0	pos
neg_4875	Undecylenic acid	metab_12045	1.22e-06	6.81e-06	1.1889	1.1836	0.7299	-0.4543	yes	C13910	-	-	-	-	-	-	LMFA01030036;HMDB0033724	Lipids and lipid-like molecules	Fatty Acyls	Fatty acids and conjugates	112-38-9	229.144	5.92348	M+FA-H	C11H20O2	0	56.8	neg
pos_6685	Glu Leu Ala	metab_6264	3.53e-05	8.84e-05	1.1882	1.1803	1.2778	0.3537	yes	-	-	-	-	-	-	-	-	-	-	-	-	332.182	3.16903	M+H	C14H25N3O6	37.4	0	pos
pos_2819	Etimicin	metab_2008	7.94e-08	5.93e-07	1.1881	1.1874	1.3343	0.4161	yes	-	-	-	-	-	-	-	HMDB0252101	Organic oxygen compounds	Organooxygen compounds	Carbohydrates and carbohydrate conjugates	-	500.308	4.41453	M+Na	C21H43N5O7	0	77	pos
pos_3215	Perindopril	metab_2447	0.0001286	0.0002748	1.188	1.1863	0.7407	-0.433	yes	C07706	-	-	-	-	-	-	HMDB0014928;PW_C009254;MJDBOTE0001391	Organic acids and derivatives	Carboxylic acids and derivatives	Amino acids, peptides, and analogues	107133-36-8;82834-16-0	432.249	5.6435	M+ACN+Na	C19H32N2O5	0	38	pos
pos_5041	Tauro-alpha-muricholic acid	metab_4451	0.002752	0.004135	1.1878	1.1712	1.2773	0.3531	yes	-	-	-	-	-	-	-	HMDB0000932;HMDB0258742	Lipids and lipid-like molecules	Steroids and steroid derivatives	Bile acids, alcohols and derivatives	25696-60-0	538.281	6.02748	M+Na	C26H45NO7S	0	48.8	pos
pos_1624	[(2S,3R)-2-Amino-3-hydroxybutanoyl] (2S)-pyrrolidine-2-carboxylate	metab_694	0.0008433	0.001444	1.1878	1.1989	1.288	0.3651	yes	-	-	-	-	-	-	-	HMDB0257877	Organic acids and derivatives	Carboxylic acids and derivatives	Amino acids, peptides, and analogues	-	217.118	0.961483	M+H, M+ACN+H	C9H16N2O4	0	42.6	pos
pos_2384	Ile Ile Asp	metab_1529	2.21e-05	5.93e-05	1.1874	1.1887	1.3311	0.4126	yes	-	-	-	-	-	-	-	-	-	-	-	-	360.213	3.35237	M+H	C16H29N3O6	68.5	0	pos
neg_7318	Benazeprilat	metab_14748	0.001529	0.002438	1.1869	1.1649	1.318	0.3983	yes	C21541	-	-	-	-	-	-	PW_C040467;HMDB0060582	Organic acids and derivatives	Carboxylic acids and derivatives	Amino acids, peptides, and analogues	86541-78-8	431.14	1.23593	M+Cl	C22H24N2O5	0	35.3	neg
neg_6227	Etiracetam	metab_13542	1.13e-05	3.96e-05	1.1868	1.1867	1.3067	0.386	yes	C07841	-	-	-	-	-	-	HMDB0015333;HMDB0252105	Organic acids and derivatives	Carboxylic acids and derivatives	Amino acids, peptides, and analogues	102767-28-2	385.209	4.05267	2M+FA-H	C8H14N2O2	0	57.9	neg
pos_6919	Leu Glu Thr	metab_6522	0.0009303	0.001575	1.1865	1.1953	1.3066	0.3858	yes	-	-	-	-	-	-	-	-	-	-	-	-	362.192	2.86583	M+H	C15H27N3O7	81.7	0	pos
neg_5366	4,17-Dimethyltrilostane	metab_12589	0.0003606	0.0006755	1.1864	1.19	1.3732	0.4576	yes	-	-	-	-	-	-	-	HMDB0242688	Lipids and lipid-like molecules	Steroids and steroid derivatives	Estrane steroids	-	378.203	5.27165	M+Na-2H	C22H31NO3	0	52.6	neg
pos_1864	3-Aminopyrazin-2-ol	metab_957	9.07e-06	2.77e-05	1.1861	1.1846	0.7871	-0.3454	yes	-	-	-	-	-	-	-	HMDB0245823	Organoheterocyclic compounds	Diazines	Pyrazines	-	112.051	1.3264	M+H	C4H5N3O	0	35.2	pos
neg_5945	Prolyl-Tryptophan	metab_13230	6.51e-05	0.0001626	1.186	1.1905	1.3691	0.4532	yes	-	-	-	-	-	-	-	HMDB0029028	Organic acids and derivatives	Carboxylic acids and derivatives	Amino acids, peptides, and analogues	-	300.135	4.39872	M-H	C16H19N3O3	0	36.9	neg
neg_5028	Glucosyl (E)-2,6-Dimethyl-2,5-heptadienoate	metab_12215	0.002542	0.003858	1.1856	1.1979	1.427	0.513	yes	-	-	-	-	-	-	-	HMDB0035136	Organic oxygen compounds	Organooxygen compounds	Carbohydrates and carbohydrate conjugates	261949-43-3	361.151	5.79305	M+FA-H	C15H24O7	0	30.6	neg
pos_4784	Dehydrocholic Acid	metab_4167	3.68e-06	1.3e-05	1.1852	1.1818	0.7842	-0.3507	yes	C13154	-	-	-	-	-	-	LMST04010106;MJDBOTE0000546	-	-	-	81-23-2	385.237	6.24985	M+H-H2O	C24H34O5	59.7	0	pos
pos_6489	Asp Glu Leu	metab_6049	0.006209	0.008677	1.1846	1.1813	1.4146	0.5004	yes	-	-	-	-	-	-	-	-	-	-	-	-	376.171	3.44808	M+H	C15H25N3O8	70.4	0	pos
pos_6732	2-Propylglutaric acid	metab_6316	4.71e-06	1.6e-05	1.1846	1.1738	0.6875	-0.5406	yes	C16658	-	-	map00982	Drug metabolism - cytochrome P450	Metabolism	Xenobiotics biodegradation and metabolism	HMDB0060684;PW_C040548	Lipids and lipid-like molecules	Fatty Acyls	Fatty acids and conjugates	32806-62-5	157.086	3.1052	M+H-H2O	C8H14O4	0	53.2	pos
pos_5091	Clomipramine	metab_4505	1.38e-05	3.94e-05	1.1841	1.1736	0.7454	-0.4239	yes	C06918	-	-	-	-	-	-	PW_C009649;HMDB0015372	Organoheterocyclic compounds	Benzazepines	Dibenzazepines	303-49-1	332.188	5.98768	M+NH4	C19H23ClN2	53.2	0	pos
neg_5370	PGP(i-12:0/a-15:0)	metab_12594	1.47e-07	1.36e-06	1.1836	1.1798	1.2843	0.3609	yes	C03892	-	-	map01100;map00564	Metabolic pathways;Glycerophospholipid metabolism	Metabolism;Metabolism	Global and overview maps;Lipid metabolism	HMDB0116532;PW_C076337	Lipids and lipid-like molecules	Glycerophospholipids	Glycerophosphoglycerophosphates	-	753.379	5.26573	M+Na-2H	C33H66O13P2	0	34.6	neg
pos_7450	5-Hydroxypentanoic acid	metab_7106	0.0002581	0.0005046	1.1835	1.1988	0.7591	-0.3977	yes	C02804	-	-	-	-	-	-	HMDB0061927	Lipids and lipid-like molecules	Fatty Acyls	Fatty acids and conjugates	13392-69-3	101.06	0.961483	M+H-H2O	C5H10O3	0	49.5	pos
pos_738	Cucurbic acid	metab_7029	0.0007655	0.001324	1.1834	1.1684	0.7347	-0.4447	yes	C08482	-	-	-	-	-	-	HMDB0029388	Lipids and lipid-like molecules	Fatty Acyls	Lineolic acids and derivatives	58240-50-9	213.148	5.00975	M+H-H2O, M+H	C12H20O3	0	49.1	pos
neg_5454	(-)-Fumigaclavine B	metab_12687	3.47e-06	1.54e-05	1.1831	1.1726	0.768	-0.3808	yes	-	-	-	-	-	-	-	HMDB0030201	Organic acids and derivatives	Carboxylic acids and derivatives	Amino acids, peptides, and analogues	6879-93-2	293.107	5.14658	M+K-2H	C16H20N2O	0	37.6	neg
pos_3492	Taurochenodeoxycholic Acid	metab_2749	6.17e-05	0.000143	1.182	1.1838	1.2377	0.3077	yes	C05465	-	-	map04976;map04979;map00121;map00120	Bile secretion;Cholesterol metabolism;Secondary bile acid biosynthesis;Primary bile acid biosynthesis	Organismal Systems;Organismal Systems;Metabolism;Metabolism	Digestive system;Digestive system;Lipid metabolism;Lipid metabolism	HMDB0000951;LMST05040005;HMDB0242411;HMDB0000949;MJDBOTE0001075	Lipids and lipid-like molecules	Steroids and steroid derivatives	Bile acids, alcohols and derivatives	516-35-8;53-02-1	517.33	6.25773	M+NH4	C26H45NO6S	66.6	0	pos
pos_7167	N-(gamma-Glutamyl)ethanolamine	metab_6798	0.001843	0.002895	1.1816	1.1842	1.3342	0.4159	yes	-	-	-	-	-	-	-	HMDB0039222	Organic acids and derivatives	Carboxylic acids and derivatives	Amino acids, peptides, and analogues	2650-74-0	403.182	2.56425	2M+Na	C7H14N2O4	0	48	pos
pos_6311	Nonate	metab_5853	1.26e-05	3.64e-05	1.1808	1.1752	0.6752	-0.5666	yes	-	-	-	-	-	-	-	HMDB0011717	Lipids and lipid-like molecules	Fatty Acyls	Fatty acids and conjugates	-	171.102	3.71343	M+H-H2O	C9H16O4	0	34.2	pos
neg_649	MG(20:4(5Z,7E,11Z,14Z)-OH(9)/0:0/0:0)	metab_13832	1.51e-05	5.01e-05	1.1807	1.1835	0.7788	-0.3607	yes	-	-	-	-	-	-	-	HMDB0260476	Not Available	Not Available	Not Available	-	439.27	5.95487	M+FA-H, 2M+Hac-H	C23H38O5	0	42.7	neg
pos_2969	2-amino-5-(amino-dimethylamino-methylidene)amino-pentanoic acid	metab_2173	0.0007621	0.001319	1.1805	1.1664	0.6767	-0.5634	yes	C03626	-	-	-	-	-	-	HMDB0001539;HMDB0244994	Organic acids and derivatives	Carboxylic acids and derivatives	Amino acids, peptides, and analogues	30315-93-6	266.159	4.88107	M+ACN+Na	C8H18N4O2	0	37.4	pos
neg_4793	3-Methyl-2-(3-pyridyl)-1-indoleoctanoic acid	metab_11954	7.52e-06	2.83e-05	1.1799	1.1692	0.7784	-0.3613	yes	-	-	-	-	-	-	-	HMDB0249870	Organoheterocyclic compounds	Indoles and derivatives	Indolyl carboxylic acids and derivatives	-	387.148	5.9627	M+K-2H	C22H26N2O2	0	36.7	neg
neg_1883	(S)-3-Hydroxy-N-methylcoclaurine	metab_8736	0.0002281	0.0004605	1.1792	1.1863	1.3921	0.4772	yes	C05202	-	-	map00950;map01100;map01110;map01063	Isoquinoline alkaloid biosynthesis;Metabolic pathways;Biosynthesis of secondary metabolites;Biosynthesis of alkaloids derived from shikimate pathway	Metabolism;Metabolism;Metabolism;Metabolism	Biosynthesis of other secondary metabolites;Global and overview maps;Global and overview maps;Chemical structure transformation maps	HMDB0006921	Organoheterocyclic compounds	Isoquinolines and derivatives	Benzylisoquinolines	-	336.12	3.90323	M+Na-2H	C18H21NO4	0	45.1	neg
neg_5465	5-Chloro-2'-deoxyuridine	metab_12699	0.0007886	0.001352	1.1791	1.1921	0.6992	-0.5162	yes	-	-	-	-	-	-	-	HMDB0250110	Nucleosides, nucleotides, and analogues	Pyrimidine nucleosides	Pyrimidine 2''-deoxyribonucleosides	-	261.029	5.13088	M-H	C9H11ClN2O5	0	44.8	neg
neg_4319	13,14-Dihydro-15-keto-PGE2	metab_11429	2.1e-06	1.02e-05	1.1791	1.1733	0.8235	-0.2802	yes	C04671	-	-	-	-	-	-	LMFA03010031;HMDB0002776	Lipids and lipid-like molecules	Fatty Acyls	Eicosanoids	363-23-5	351.221	6.60152	M-H	C20H32O5	70.3	0	neg
pos_5989	Valylproline	metab_5493	0.0005698	0.001022	1.1777	1.1871	1.3891	0.4742	yes	-	-	-	-	-	-	-	HMDB0029135	Organic acids and derivatives	Carboxylic acids and derivatives	Amino acids, peptides, and analogues	20488-27-1	451.252	4.26132	2M+Na	C10H18N2O3	0	51.6	pos
pos_1292	9S,10S,11R-trihydroxy-12Z-octadecenoic acid	metab_325	0.001236	0.002025	1.1777	1.1577	0.7395	-0.4354	yes	-	-	-	-	-	-	-	LMFA02000011	-	-	-	-	313.237	6.0993	M+H-H2O, M+NH4	C18H34O5	42.2	0	pos
pos_5440	Val Leu Leu	metab_4891	0.0003933	0.0007348	1.1775	1.1823	1.3892	0.4743	yes	-	-	-	-	-	-	-	-	-	-	-	-	344.254	5.3544	M+H	C17H33N3O4	38.7	0	pos
pos_5243	17alpha-Methylestradiol	metab_4673	7.09e-07	3.33e-06	1.1763	1.1738	0.7631	-0.39	yes	C14483	-	-	-	-	-	-	HMDB0244778	Lipids and lipid-like molecules	Steroids and steroid derivatives	Estrane steroids	302-76-1	309.18	5.78803	M+Na	C19H26O2	0	31.7	pos
pos_109	1-[2-(1,3-benzodioxol-5-yl)-2-hydroxypropyl]-3-cyclohexylurea	metab_101	8e-10	2.22e-08	1.1763	1.1706	0.8168	-0.292	yes	-	-	-	-	-	-	-	-	-	-	-	-	321.181	5.93182	M+H, 2M+Na, 2M+H	C17H24N2O4	61.9	0	pos
neg_5524	Phenylalanyl-prolyl-arginine nitrile	metab_12765	2.64e-06	1.24e-05	1.1761	1.1657	1.364	0.4479	yes	-	-	-	-	-	-	-	HMDB0256435	Organic acids and derivatives	Carboxylic acids and derivatives	Amino acids, peptides, and analogues	-	420.21	5.03175	M+Na-2H	C20H29N7O2	0	51.1	neg
pos_2044	5-Hydroxylysine	metab_1157	0.0003529	0.0006675	1.1755	1.1718	1.2933	0.3711	yes	C16741	-	-	map01100;map00310	Metabolic pathways;Lysine degradation	Metabolism;Metabolism	Global and overview maps;Amino acid metabolism	HMDB0245508;HMDB0000450	Organic acids and derivatives	Carboxylic acids and derivatives	Amino acids, peptides, and analogues	1190-94-9	347.192	2.65998	2M+Na	C6H14N2O3	0	47.4	pos
neg_5582	Senecionine N-oxide	metab_12829	4.33e-05	0.0001173	1.1752	1.1764	0.7067	-0.5009	yes	C15612	-	-	map00960	Tropane, piperidine and pyridine alkaloid biosynthesis	Metabolism	Biosynthesis of other secondary metabolites	HMDB0258230	Alkaloids and derivatives	Not Available	Not Available	-	372.142	4.95127	M+Na-2H	C18H25NO6	0	57	neg
pos_7113	Arg Ile Ala	metab_6739	4.62e-05	0.0001114	1.175	1.1761	1.3003	0.3788	yes	-	-	-	-	-	-	-	-	-	-	-	-	359.24	2.676	M+H	C15H30N6O4	73.5	0	pos
pos_2936	Beta-Tyrosine	metab_2137	2.54e-10	9.86e-09	1.1746	1.1707	0.7921	-0.3362	yes	C04368	-	-	map00350	Tyrosine metabolism	Metabolism	Amino acid metabolism	HMDB0003831	Organic acids and derivatives	Carboxylic acids and derivatives	Amino acids, peptides, and analogues	-	164.071	4.78507	M+H-H2O	C9H11NO3	0	68.4	pos
neg_1311	N-Acetyl-b-D-galactosamine	metab_8103	3e-06	1.37e-05	1.1742	1.1702	0.7638	-0.3888	yes	C05021	-	-	-	-	-	-	HMDB0000853	Organic oxygen compounds	Organooxygen compounds	Carbohydrates and carbohydrate conjugates	14131-60-3	202.072	3.22528	M-H2O-H	C8H15NO6	0	39.8	neg
pos_6900	Thioperamide	metab_6502	6.38e-05	0.0001471	1.1731	1.16	0.754	-0.4074	yes	C17933	-	-	map07227	Histamine H2/H3 receptor agonists/antagonists	Drug Development	Target-based classification: G protein-coupled receptors	HMDB0259023	Organoheterocyclic compounds	Piperidines	Not Available	106243-16-7	257.161	2.88977	M+H-2H2O	C15H24N4S	0	33.4	pos
neg_6599	4-(4-Nitrobenzyl)pyridine	metab_13952	2.94e-05	8.65e-05	1.1725	1.1662	0.6921	-0.531	yes	-	-	-	-	-	-	-	HMDB0246294	Benzenoids	Benzene and substituted derivatives	Nitrobenzenes	-	249.044	3.65065	M+Cl	C12H10N2O2	0	34.2	neg
neg_6955	5-Hydroxylysinonorleucine	metab_14347	4.86e-09	9.22e-08	1.172	1.1661	1.3207	0.4013	yes	-	-	-	-	-	-	-	HMDB0246805	Organic acids and derivatives	Carboxylic acids and derivatives	Amino acids, peptides, and analogues	-	272.162	3.31982	M-H2O-H	C12H25N3O5	0	57.2	neg
neg_3739	PE(18:2/0:0)	metab_10786	5.25e-08	5.82e-07	1.1712	1.1684	1.316	0.3962	yes	-	-	-	-	-	-	-	-	-	-	-	-	476.278	7.53885	M-H	C23H44NO7P	86.5	0	neg
neg_2308	Fumigaclavine A	metab_9207	0.0001116	0.0002541	1.1712	1.1574	0.7678	-0.3812	yes	C20436	-	-	map01110;map00901	Biosynthesis of secondary metabolites;Indole alkaloid biosynthesis	Metabolism;Metabolism	Global and overview maps;Biosynthesis of other secondary metabolites	HMDB0030202	Alkaloids and derivatives	Ergoline and derivatives	Clavines and derivatives	6879-59-0	335.117	4.54393	M+K-2H	C18H22N2O2	0	39	neg
neg_5246	Val Ala Phe Asp	metab_12457	4.39e-08	5.07e-07	1.1706	1.172	1.3799	0.4645	yes	-	-	-	-	-	-	-	-	-	-	-	-	449.204	5.44175	M-H	C21H30N4O7	70.4	0	neg
pos_2799	Thr Ile Leu	metab_1986	0.01283	0.01679	1.1702	1.1963	1.4113	0.497	yes	-	-	-	-	-	-	-	-	-	-	-	-	346.233	4.3746	M+H	C16H31N3O5	72.8	0	pos
pos_5906	Eremanthin	metab_5402	0.0001541	0.0003207	1.1701	1.1705	0.7094	-0.4953	yes	C09406	-	-	-	-	-	-	HMDB0302703	Lipids and lipid-like molecules	Prenol lipids	Terpene lactones	37936-58-6	253.118	4.41453	M+Na	C15H18O2	0	39.9	pos
neg_5981	Glutamyltryptophan	metab_13270	0.002489	0.003787	1.1698	1.1787	1.4508	0.5369	yes	-	-	-	-	-	-	-	HMDB0028830	Organic acids and derivatives	Carboxylic acids and derivatives	Amino acids, peptides, and analogues	38101-59-6	332.125	4.35957	M-H	C16H19N3O5	0	45.7	neg
neg_1755	Gabazine	metab_8594	9e-06	3.28e-05	1.1694	1.1645	1.2619	0.3356	yes	C13796	-	-	-	-	-	-	HMDB0252568	Organoheterocyclic compounds	Diazines	Pyridazines and derivatives	-	332.125	3.73752	M+FA-H	C15H17N3O3	0	57.3	neg
pos_3294	Ortho-Hydroxyphenylacetic acid	metab_2532	3.33e-07	1.8e-06	1.1693	1.1629	0.7711	-0.375	yes	C05852	-	-	map01100;map00360;map01120;map00643	Metabolic pathways;Phenylalanine metabolism;Microbial metabolism in diverse environments;Styrene degradation	Metabolism;Metabolism;Metabolism;Metabolism	Global and overview maps;Amino acid metabolism;Global and overview maps;Xenobiotics biodegradation and metabolism	HMDB0000669	Benzenoids	Benzene and substituted derivatives	Phenylacetic acids	614-75-5	194.081	5.8838	M+ACN+H	C8H8O3	0	48.6	pos
pos_7033	4-Hydroxy-2,6,6-trimethyl-3-oxo-1,4-cyclohexadiene-1-carboxaldehyde	metab_6650	2.74e-06	1.01e-05	1.1693	1.1578	0.7646	-0.3873	yes	-	-	-	-	-	-	-	HMDB0037602	Organic oxygen compounds	Organooxygen compounds	Carbonyl compounds	35692-95-6	198.112	2.77982	M+NH4	C10H12O3	0	31.5	pos
pos_5185	Indole-3-Carbinol	metab_4609	5.7e-07	2.8e-06	1.1691	1.1632	0.7632	-0.3899	yes	-	-	-	-	-	-	-	HMDB0005785	Organoheterocyclic compounds	Indoles and derivatives	Indoles	700-06-1	148.076	5.8918	M+H	C9H9NO	55	0	pos
neg_2161	Alanyltryptophan	metab_9045	0.0002115	0.000433	1.1687	1.1676	1.3368	0.4188	yes	-	-	-	-	-	-	-	HMDB0013209	Organic acids and derivatives	Carboxylic acids and derivatives	Amino acids, peptides, and analogues	16305-75-2	274.12	4.28907	M-H	C14H17N3O3	0	40	neg
pos_648	Val Ser Ile	metab_6039	0.0003149	0.0006047	1.1687	1.1683	1.3459	0.4286	yes	-	-	-	-	-	-	-	-	-	-	-	-	318.202	4.11663	M+H-H2O, M+H	C14H27N3O5	69.7	0	pos
pos_3205	Kynurenic Acid	metab_2436	1.61e-06	6.52e-06	1.1686	1.1628	0.733	-0.4482	yes	C01717	-	-	map01100;map00380	Metabolic pathways;Tryptophan metabolism	Metabolism;Metabolism	Global and overview maps;Amino acid metabolism	PW_C000566;HMDB0000715;MJDBOTE0000367	Organoheterocyclic compounds	Quinolines and derivatives	Quinoline carboxylic acids	492-27-3	190.05	5.6116	M+H	C10H7NO3	92.7	0	pos
neg_5758	Flecainide	metab_13023	9.39e-06	3.39e-05	1.1686	1.1577	1.3609	0.4446	yes	C07001	-	-	-	-	-	-	HMDB0015326;PW_C009608	Benzenoids	Benzene and substituted derivatives	Benzoic acids and derivatives	54143-55-4	395.121	4.65618	M-H2O-H	C17H20F6N2O3	0	43	neg
pos_1309	Sorbitan laurate	metab_344	0.0006204	0.001101	1.1684	1.15	0.7802	-0.3581	yes	-	-	-	-	-	-	-	LMFA07011017;HMDB0029885	Lipids and lipid-like molecules	Fatty Acyls	Fatty acid esters	1338-39-2	311.221	6.08332	M+H-2H2O, M+ACN+Na	C18H34O6	0	40	pos
neg_6121	Tryptophylhydroxyproline	metab_13427	0.0001383	0.0003032	1.168	1.1733	1.4121	0.4979	yes	-	-	-	-	-	-	-	HMDB0029084	Organic acids and derivatives	Carboxylic acids and derivatives	Amino acids, peptides, and analogues	844640-75-1	316.131	4.163	M-H	C16H19N3O4	0	52	neg
pos_5472	Goshonoside F3	metab_4924	0.0002607	0.000509	1.168	1.1719	0.7415	-0.4314	yes	-	-	-	-	-	-	-	HMDB0038376	Lipids and lipid-like molecules	Prenol lipids	Terpene glycosides	90851-26-6	609.328	5.29777	M+H-2H2O	C32H52O13	0	74.7	pos
pos_6654	Phaseollin	metab_7748	0.0001258	0.0002696	1.1679	1.1748	1.3488	0.4316	yes	C10515	-	-	-	-	-	-	HMDB0034411;HMDB0034173	Phenylpropanoids and polyketides	Isoflavonoids	Pyranoisoflavonoids	40323-57-7;13401-40-6	364.153	3.20938	M+ACN+H	C20H18O4	0	46.3	pos
neg_2099	Nivalenol	metab_8975	0.0001337	0.0002945	1.1673	1.1727	0.7346	-0.445	yes	C06080	-	-	map00909	Sesquiterpenoid and triterpenoid biosynthesis	Metabolism	Metabolism of terpenoids and polyketides	HMDB0004304	Lipids and lipid-like molecules	Prenol lipids	Sesquiterpenoids	23282-20-4	293.1	4.19432	M-H2O-H	C15H20O7	0	61.2	neg
pos_6083	Ametryn	metab_5599	0.00114	0.00189	1.1671	1.1527	1.3319	0.4135	yes	C18700	-	-	-	-	-	-	HMDB0248288	Organoheterocyclic compounds	Triazines	1,3,5-triazines	834-12-8	472.277	4.07595	2M+NH4	C9H17N5S	0	40.8	pos
neg_4195	Sorbitan palmitate	metab_11292	0.001888	0.002944	1.1666	1.209	1.2868	0.3637	yes	-	-	-	-	-	-	-	HMDB0029887;LMFA07011019	Lipids and lipid-like molecules	Fatty Acyls	Fatty acid esters	26266-57-9	437.267	6.85155	M+Cl	C22H42O6	0	60.6	neg
pos_60	LysoPG(18:2(9Z,12Z)/0:0)	metab_5506	0.0001912	0.000388	1.1663	1.1526	1.2664	0.3408	yes	-	-	-	-	-	-	-	HMDB0240600	Lipids and lipid-like molecules	Glycerophospholipids	Glycerophosphoglycerols	2093174-30-0	531.269	6.8064	M+H-H2O, M+H, M+Na, M+H-2H2O	C24H45O9P	0	38.8	pos
neg_4770	20-Hydroxyeicosatetraenoic acid	metab_11929	3.42e-05	9.69e-05	1.1662	1.1673	0.7687	-0.3796	yes	C14748	-	-	map00590;map01100;map04270	Arachidonic acid metabolism;Metabolic pathways;Vascular smooth muscle contraction	Metabolism;Metabolism;Organismal Systems	Lipid metabolism;Global and overview maps;Circulatory system	PW_C002614;HMDB0005998	Lipids and lipid-like molecules	Fatty Acyls	Fatty acids and conjugates	79551-86-3	365.233	5.98617	M+FA-H	C20H32O3	0	34.8	neg
pos_1996	Pro Pro Thr	metab_1102	0.0001773	0.0003626	1.1659	1.1625	1.2685	0.3431	yes	-	-	-	-	-	-	-	-	-	-	-	-	314.171	2.52433	M+H	C14H23N3O5	55.6	0	pos
pos_580	5'-N-Methylcarboxamidoadenosine	metab_5284	1.53e-06	6.23e-06	1.1655	1.1558	0.7815	-0.3558	yes	-	-	-	-	-	-	-	HMDB0246883	Nucleosides, nucleotides, and analogues	Purine nucleosides	Not Available	-	295.115	3.6092	M+H, M+CH3OH+H	C11H14N6O4	0	45.3	pos
neg_2183	3-Hydroxytrideca-5,8-dienoylcarnitine	metab_9069	1.41e-05	4.74e-05	1.1643	1.1541	1.3186	0.399	yes	-	-	-	-	-	-	-	HMDB0241331	Lipids and lipid-like molecules	Fatty Acyls	Fatty acid esters	-	406.197	4.33607	M+K-2H	C20H35NO5	0	50.9	neg
pos_2557	N-Myristoyl Glutamine	metab_1721	1.95e-05	5.33e-05	1.1641	1.1663	1.3219	0.4026	yes	-	-	-	-	-	-	-	LMFA08020219;HMDB0242050	Organic acids and derivatives	Carboxylic acids and derivatives	Amino acids, peptides, and analogues	-	401.239	3.74543	M+2Na-H	C19H36N2O4	0	35.2	pos
neg_6041	Ferulic Acid	metab_13338	7.6e-07	4.77e-06	1.1641	1.1549	1.4215	0.5074	yes	C01494	-	-	map01100;map00940;map01110;map01061	Metabolic pathways;Phenylpropanoid biosynthesis;Biosynthesis of secondary metabolites;Biosynthesis of phenylpropanoids	Metabolism;Metabolism;Metabolism;Metabolism	Global and overview maps;Biosynthesis of other secondary metabolites;Global and overview maps;Chemical structure transformation maps	HMDB0000954;MJDBOTE0000325	Phenylpropanoids and polyketides	Cinnamic acids and derivatives	Hydroxycinnamic acids and derivatives	537-98-4	193.05	4.26557	M-H	C10H10O4	98.6	0	neg
pos_3284	(+/-)-Metalaxyl	metab_2521	5.4e-08	4.55e-07	1.164	1.1631	0.803	-0.3165	yes	C10947	-	-	-	-	-	-	HMDB0031802	Organic acids and derivatives	Carboxylic acids and derivatives	Amino acids, peptides, and analogues	-	343.164	5.85985	M+ACN+Na	C15H21NO4	0	34.2	pos
pos_7473	Stizolamine	metab_7129	0.008172	0.01118	1.164	1.1722	1.3249	0.4059	yes	-	-	-	-	-	-	-	HMDB0302288	Organoheterocyclic compounds	Diazines	Pyrazines	-	198.097	0.937883	M+H	C7H11N5O2	0	30.2	pos
pos_3701	Eicosapentaenoic acid ethyl ester	metab_2976	3.43e-07	1.84e-06	1.1638	1.163	1.314	0.394	yes	C16184	-	-	-	-	-	-	HMDB0249402;HMDB0039530	Lipids and lipid-like molecules	Fatty Acyls	Fatty acid esters	86227-47-6	363.289	6.98888	M+CH3OH+H	C22H34O2	0	50.4	pos
pos_3257	5-(3-Pyridyl)-2-hydroxytetrahydrofuran	metab_2492	4.22e-08	3.86e-07	1.1628	1.1574	0.774	-0.3697	yes	C19578	-	-	map05204;map00980	Chemical carcinogenesis - DNA adducts;Metabolism of xenobiotics by cytochrome P450	Human Diseases;Metabolism	Cancer: overview;Xenobiotics biodegradation and metabolism	HMDB0062407	Organoheterocyclic compounds	Pyridines and derivatives	Not Available	53798-73-5	148.076	5.7721	M+H-H2O	C9H11NO2	0	39.5	pos
pos_2403	(2S)-2-Butanol O-[b-D-Apiofuranosyl-(1->6)-b-D-glucopyranoside]	metab_1551	1.01e-05	3.04e-05	1.1627	1.1602	1.2672	0.3417	yes	-	-	-	-	-	-	-	HMDB0041255	Organic oxygen compounds	Organooxygen compounds	Carbohydrates and carbohydrate conjugates	-	401.203	3.39213	M+CH3OH+H	C15H28O10	0	32.9	pos
pos_2986	MURABUTIDE	metab_2192	2.55e-07	1.44e-06	1.1618	1.1625	1.3083	0.3877	yes	-	-	-	-	-	-	-	HMDB0254948	Organic acids and derivatives	Carboxylic acids and derivatives	Amino acids, peptides, and analogues	-	590.303	4.92907	M+ACN+H	C23H40N4O11	0	65.4	pos
neg_2469	Glycyl-prolyl-glutamic acid	metab_9383	4.67e-08	5.3e-07	1.1617	1.1571	0.7531	-0.409	yes	-	-	-	-	-	-	-	HMDB0252832	Organic acids and derivatives	Carboxylic acids and derivatives	Amino acids, peptides, and analogues	-	282.109	4.86442	M-H2O-H	C12H19N3O6	0	31.3	neg
neg_64	MG(22:4(7Z,10Z,13Z,16Z)/0:0/0:0)	metab_13732	0.0001489	0.0003231	1.1612	1.1464	0.7585	-0.3987	yes	-	-	-	-	-	-	-	HMDB0011584	Lipids and lipid-like molecules	Glycerolipids	Monoradylglycerols	-	451.306	6.37492	M+Na-2H, M+FA-H, M-H	C25H42O4	0	75.1	neg
neg_2313	3-Oxovalproic acid	metab_9213	6.13e-05	0.000155	1.1606	1.1529	0.7545	-0.4063	yes	C16652	-	-	map00982	Drug metabolism - cytochrome P450	Metabolism	Xenobiotics biodegradation and metabolism	PW_C040543;HMDB0060685	Organic acids and derivatives	Keto acids and derivatives	Short-chain keto acids and derivatives	60113-81-7	203.092	4.5596	M+FA-H	C8H14O3	0	59.2	neg
neg_5678	L-Canaline	metab_12934	1.23e-06	6.83e-06	1.1596	1.1566	1.3293	0.4107	yes	C08270	-	-	-	-	-	-	HMDB0012251	Organic acids and derivatives	Carboxylic acids and derivatives	Amino acids, peptides, and analogues	496-93-5	401.204	4.79582	3M-H	C4H10N2O3	0	46.5	neg
neg_1165	Histidylisoleucine	metab_7940	0.005949	0.008341	1.1594	1.1658	1.3339	0.4156	yes	-	-	-	-	-	-	-	HMDB0028888	Organic acids and derivatives	Carboxylic acids and derivatives	Amino acids, peptides, and analogues	129050-48-2	267.146	1.71423	M-H	C12H20N4O3	0	46	neg
pos_26	Gly Leu Leu	metab_1768	0.0001625	0.0003363	1.1593	1.1571	1.2468	0.3183	yes	-	-	-	-	-	-	-	-	-	-	-	-	302.207	4.66372	M+H, M+K, M+Na, M+H-H2O	C14H27N3O4	76.4	0	pos
pos_5468	Melilotoside D	metab_4919	1.59e-05	4.46e-05	1.1582	1.1597	1.3577	0.4412	yes	-	-	-	-	-	-	-	HMDB0041467	Lipids and lipid-like molecules	Prenol lipids	Triterpenoids	172659-13-1	538.277	5.30577	M+2Na	C52H86O20	0	56.8	pos
pos_864	3-Oxocholic acid	metab_7544	3.06e-07	1.67e-06	1.158	1.1607	0.8273	-0.2736	yes	-	-	-	-	-	-	-	LMST04010443;HMDB0000502	Lipids and lipid-like molecules	Steroids and steroid derivatives	Bile acids, alcohols and derivatives	2304-89-4	424.305	6.1152	M+NH4, M+Na	C24H38O5	0	67.2	pos
pos_5722	Ecgonine	metab_5199	1.89e-09	4.11e-08	1.158	1.153	0.7926	-0.3353	yes	C10858	-	-	map00960	Tropane, piperidine and pyridine alkaloid biosynthesis	Metabolism	Biosynthesis of other secondary metabolites	HMDB0006548	Alkaloids and derivatives	Tropane alkaloids	Not Available	481-37-8	186.112	4.80107	M+H	C9H15NO3	0	41.8	pos
neg_3296	Traumatic Acid	metab_10297	1.48e-05	4.91e-05	1.1575	1.1487	0.7961	-0.329	yes	C16308	-	-	map00592;map01110	alpha-Linolenic acid metabolism;Biosynthesis of secondary metabolites	Metabolism;Metabolism	Lipid metabolism;Global and overview maps	HMDB0000933;LMFA01170002	Lipids and lipid-like molecules	Fatty Acyls	Fatty acids and conjugates	6402-36-4	227.128	6.25042	M-H	C12H20O4	79.5	0	neg
neg_3034	Maslinic acid 3-O-b-D-glucoside	metab_10009	8.6e-09	1.4e-07	1.1572	1.1538	1.2532	0.3256	yes	-	-	-	-	-	-	-	HMDB0029606	Lipids and lipid-like molecules	Prenol lipids	Terpene glycosides	163634-06-8	655.383	5.86083	M+Na-2H	C36H58O9	0	53.4	neg
neg_4701	Furazabol	metab_11853	1.11e-05	3.89e-05	1.1568	1.1471	0.7677	-0.3813	yes	-	-	-	-	-	-	-	HMDB0252534	Lipids and lipid-like molecules	Steroids and steroid derivatives	Estrane steroids	-	367.179	6.0561	M+K-2H	C20H30N2O2	0	32.6	neg
pos_7295	Ethyl beta-D-fructofuranoside	metab_6935	0.003142	0.004671	1.1561	1.1371	1.3427	0.4251	yes	-	-	-	-	-	-	-	HMDB0303035	Organic oxygen compounds	Organooxygen compounds	Carbohydrates and carbohydrate conjugates	-	226.128	1.76557	M+NH4	C8H16O6	0	38.9	pos
pos_4361	Isolithocholic acid	metab_3702	1.95e-06	7.61e-06	1.156	1.1536	1.3009	0.3795	yes	C17658	-	-	map00121	Secondary bile acid biosynthesis	Metabolism	Lipid metabolism	HMDB0000717;LMST04010004	Lipids and lipid-like molecules	Steroids and steroid derivatives	Bile acids, alcohols and derivatives	1534-35-6	394.331	6.8541	M+NH4	C24H40O3	0	47.5	pos
pos_7191	Deoxyuridine	metab_6825	0.0004226	0.0007818	1.1559	1.1575	0.7302	-0.4536	yes	C00526	Nucleic acids	Nucleosides	map00240;map01100;map02010	Pyrimidine metabolism;Metabolic pathways;ABC transporters	Metabolism;Metabolism;Environmental Information Processing	Nucleotide metabolism;Global and overview maps;Membrane transport	HMDB0245528;PW_C000007;HMDB0000012;MJDBOTE0000510	Nucleosides, nucleotides, and analogues	Pyrimidine nucleosides	Pyrimidine 2''-deoxyribonucleosides	951-78-0	251.064	2.52433	M+Na	C9H12N2O5	0	34.8	pos
pos_1988	5-Hydroxymethyl-2-furancarboxaldehyde	metab_1093	5.71e-06	1.88e-05	1.1555	1.1463	0.7725	-0.3724	yes	C11101	-	-	map01120;map00365	Microbial metabolism in diverse environments;Furfural degradation	Metabolism;Metabolism	Global and overview maps;Xenobiotics biodegradation and metabolism	HMDB0034355	Organic oxygen compounds	Organooxygen compounds	Carbonyl compounds	67-47-0	168.066	2.48433	M+ACN+H	C6H6O3	0	55.9	pos
neg_1370	((4-(4-Amidinophenoxy)butanoyl)aspartyl)valine	metab_8168	9.56e-06	3.44e-05	1.1554	1.1511	1.3074	0.3867	yes	-	-	-	-	-	-	-	HMDB0242231	Organic acids and derivatives	Carboxylic acids and derivatives	Amino acids, peptides, and analogues	-	481.194	3.2807	M+FA-H	C20H28N4O7	0	63.5	neg
pos_2021	Lysyltyrosine	metab_1132	0.01383	0.01799	1.1552	1.1785	1.5518	0.6339	yes	-	-	-	-	-	-	-	HMDB0028963	Organic acids and derivatives	Carboxylic acids and derivatives	Amino acids, peptides, and analogues	35978-98-4	310.176	2.58815	M+H	C15H23N3O4	0	34.8	pos
neg_1453	3-Methylxanthine	metab_8260	7.97e-05	0.0001915	1.1546	1.1475	0.7074	-0.4994	yes	C16357	-	-	map01100;map01110;map01120;map00232	Metabolic pathways;Biosynthesis of secondary metabolites;Microbial metabolism in diverse environments;Caffeine metabolism	Metabolism;Metabolism;Metabolism;Metabolism	Global and overview maps;Global and overview maps;Global and overview maps;Biosynthesis of other secondary metabolites	HMDB0001886	Organoheterocyclic compounds	Imidazopyrimidines	Purines and purine derivatives	1076-22-8	165.041	3.3753	M-H	C6H6N4O2	0	39.1	neg
pos_187	Val Asp Thr	metab_963	0.00975	0.01312	1.1545	1.1736	1.2997	0.3782	yes	-	-	-	-	-	-	-	-	-	-	-	-	334.161	2.5483	M+H-2H2O, M+ACN+H, M+H	C13H23N3O7	65.6	0	pos
pos_640	Ustiloxin D	metab_5951	0.001861	0.002919	1.1538	1.1646	1.3384	0.4206	yes	-	-	-	-	-	-	-	HMDB0041054	Organic acids and derivatives	Carboxylic acids and derivatives	Amino acids, peptides, and analogues	158243-18-6	495.245	4.05997	M+H, M+Na	C23H34N4O8	0	78.4	pos
pos_857	Petasinine	metab_7537	1.81e-08	2.19e-07	1.1537	1.153	0.8175	-0.2906	yes	-	-	-	-	-	-	-	HMDB0030516	Organoheterocyclic compounds	Pyrrolizidines	Not Available	70474-33-8	303.17	6.08332	M+NH4, M+ACN+Na	C13H21NO3	0	44.7	pos
pos_5007	4-Methoxyestrone	metab_4415	1.39e-07	8.98e-07	1.1531	1.1508	0.7916	-0.3372	yes	C03958	Hormones and transmitters	Peptide hormones	-	-	-	-	HMDB0060088	Organic acids and derivatives	Carboxylic acids and derivatives	Amino acids, peptides, and analogues	-	345.144	6.05937	M+2Na-H	C19H24O3	0	35	pos
pos_5542	N-Arachidonoylglycine	metab_5001	7.64e-09	1.17e-07	1.153	1.1523	0.7292	-0.4555	yes	-	-	-	-	-	-	-	LMFA08020003;HMDB0005096	Organic acids and derivatives	Carboxylic acids and derivatives	Amino acids, peptides, and analogues	179113-91-8	425.276	5.16177	M+ACN+Na	C22H35NO3	0	40	pos
pos_4854	Retinoyl-AZT	metab_4244	0.0003172	0.0006085	1.153	1.163	0.774	-0.3697	yes	-	-	-	-	-	-	-	HMDB0257175	Lipids and lipid-like molecules	Prenol lipids	Retinoids	-	532.293	6.1868	M+H-H2O	C30H39N5O5	0	36.7	pos
pos_6822	Gly Asp Leu	metab_6416	0.001012	0.001699	1.153	1.1576	1.3261	0.4072	yes	-	-	-	-	-	-	-	-	-	-	-	-	304.15	2.98535	M+H	C12H21N3O6	47.7	0	pos
pos_13	5-Hydroxy-6-methoxy-1h-indole-2-carboxylic acid	metab_333	2.46e-08	2.65e-07	1.1519	1.1476	0.8241	-0.2792	yes	-	-	-	-	-	-	-	HMDB0246803	Organoheterocyclic compounds	Indoles and derivatives	Indolecarboxylic acids and derivatives	-	208.06	3.75345	M+H, M+K, M+Na, 2M+K, M+H-H2O	C10H9NO4	0	35.1	pos
pos_388	Asp Ile Lys	metab_3170	0.008335	0.01137	1.1513	1.1735	1.3212	0.4018	yes	-	-	-	-	-	-	-	-	-	-	-	-	375.223	1.86097	M+2H, M+H	C16H30N4O6	67.6	0	pos
neg_967	Histidylserine	metab_15324	0.00104	0.001737	1.1508	1.1604	1.412	0.4978	yes	-	-	-	-	-	-	-	HMDB0028894	Organic acids and derivatives	Carboxylic acids and derivatives	Amino acids, peptides, and analogues	21438-60-8	241.092	0.781417	M-H	C9H14N4O4	37	0	neg
neg_2107	Beta-D-Glucopyranosyl-11-hydroxyjasmonic acid	metab_8985	0.005162	0.007334	1.1492	1.13	1.4175	0.5033	yes	-	-	-	-	-	-	-	HMDB0039964	Lipids and lipid-like molecules	Fatty Acyls	Fatty acyl glycosides	-	387.168	4.20215	M-H	C18H28O9	0	40.3	neg
neg_4297	Deca-Durabolin	metab_15372	3.18e-06	1.44e-05	1.1488	1.1402	0.7669	-0.3828	yes	C08154	-	-	-	-	-	-	HMDB0002725;HMDB0015694;HMDB0250911	Lipids and lipid-like molecules	Steroids and steroid derivatives	Estrane steroids	434-22-0;360-70-3	473.327	6.6328	M+FA-H	C28H44O3	0	45.1	neg
neg_6770	S-Farnesyl cysteine	metab_14142	0.0002126	0.0004345	1.1481	1.1506	1.2763	0.352	yes	C19691	-	-	map01110;map00900	Biosynthesis of secondary metabolites;Terpenoid backbone biosynthesis	Metabolism;Metabolism	Global and overview maps;Metabolism of terpenoids and polyketides	HMDB0011627;HMDB0257400	Lipids and lipid-like molecules	Prenol lipids	Sesquiterpenoids	68000-92-0	360.178	3.47777	M+Cl	C18H31NO2S	0	38.5	neg
pos_5148	Monoethylhexyl phthalic acid	metab_4568	2.35e-05	6.22e-05	1.1478	1.1437	0.7322	-0.4497	yes	C03343	-	-	-	-	-	-	HMDB0013248	Benzenoids	Benzene and substituted derivatives	Benzoic acids and derivatives	4376-20-9	296.185	5.93182	M+NH4	C16H22O4	0	54.1	pos
pos_6436	Trp Glu Thr	metab_5991	3.33e-05	8.39e-05	1.1475	1.1455	1.3128	0.3926	yes	-	-	-	-	-	-	-	-	-	-	-	-	435.19	3.52067	M+H	C20H26N4O7	40.9	0	pos
neg_1109	Amoxicilloyl	metab_7879	6.02e-10	1.82e-08	1.1463	1.1439	1.2469	0.3183	yes	-	-	-	-	-	-	-	HMDB0248351	Organic acids and derivatives	Carboxylic acids and derivatives	Amino acids, peptides, and analogues	-	362.12	1.24373	M-H2O-H	C17H23N3O5S	0	67.3	neg
pos_6597	N-Acetyltryptophan	metab_6167	4.45e-08	3.98e-07	1.1462	1.1378	0.7596	-0.3967	yes	-	-	-	-	-	-	-	HMDB0255052;HMDB0013713	Organic acids and derivatives	Carboxylic acids and derivatives	Amino acids, peptides, and analogues	1218-34-4	229.097	3.28907	M+H-H2O	C13H14N2O3	0	56.3	pos
pos_520	Phthalimidinoglutarimide	metab_4626	0.0005712	0.001023	1.1456	1.1377	1.2727	0.3478	yes	-	-	-	-	-	-	-	HMDB0256503	Organoheterocyclic compounds	Isoindoles and derivatives	Isoindolines	-	262.119	3.23338	M+H, M+NH4	C13H12N2O3	0	51.6	pos
neg_5616	Phaseollinisoflavan	metab_12867	0.0005328	0.0009511	1.1454	1.1476	1.4116	0.4973	yes	C10515	-	-	-	-	-	-	HMDB0034411	Phenylpropanoids and polyketides	Isoflavonoids	Pyranoisoflavonoids	40323-57-7	323.126	4.89578	M-H	C20H20O4	0	35.7	neg
neg_6318	Xanthine amine congener	metab_13642	0.009314	0.0124	1.1451	1.1284	1.4086	0.4942	yes	-	-	-	-	-	-	-	HMDB0259918	Organoheterocyclic compounds	Imidazopyrimidines	Purines and purine derivatives	-	463.184	3.94237	M+Cl	C21H28N6O4	0	60.5	neg
neg_3323	Adrenoylcarnitine	metab_10328	9.1e-05	0.0002138	1.1451	1.145	1.2371	0.307	yes	-	-	-	-	-	-	-	HMDB0242169	Not Available	Not Available	Not Available	-	520.364	6.29697	M+FA-H	C29H49NO4	0	83.9	neg
pos_2205	Asn Asp Leu	metab_1333	0.001891	0.002957	1.145	1.1492	1.3381	0.4202	yes	-	-	-	-	-	-	-	-	-	-	-	-	361.172	2.96135	M+H	C14H24N4O7	47.4	0	pos
neg_6375	LysoPE(0:0/16:1(9Z))	metab_13705	5.48e-05	0.0001416	1.1445	1.138	1.2768	0.3526	yes	-	-	-	-	-	-	-	HMDB0011474	Lipids and lipid-like molecules	Glycerophospholipids	Glycerophosphoethanolamines	-	472.241	3.8876	M+Na-2H	C21H42NO7P	0	48	neg
pos_5376	Dihydrocapsiate	metab_4819	0.0003291	0.0006277	1.1436	1.1303	0.7802	-0.3581	yes	C20203	-	-	-	-	-	-	HMDB0034780;HMDB0034781	Benzenoids	Phenols	Methoxyphenols	-	309.206	5.49847	M+H	C18H28O4	0	42	pos
neg_3453	Argatroban	metab_10472	5.22e-05	0.0001364	1.1435	1.1395	0.7708	-0.3757	yes	C04931	-	-	-	-	-	-	HMDB0014423;PW_C008815	Organic acids and derivatives	Carboxylic acids and derivatives	Amino acids, peptides, and analogues	74863-84-6	529.222	6.52328	M+Na-2H	C23H36N6O5S	0	38.9	neg
neg_4878	Deoxycholic acid 3-glucuronide	metab_12047	3.96e-05	0.0001097	1.1432	1.148	0.8076	-0.3084	yes	C03033	-	-	map01100;map00040;map04976;map00053;map01240	Metabolic pathways;Pentose and glucuronate interconversions;Bile secretion;Ascorbate and aldarate metabolism;Biosynthesis of cofactors	Metabolism;Metabolism;Organismal Systems;Metabolism;Metabolism	Global and overview maps;Carbohydrate metabolism;Digestive system;Carbohydrate metabolism;Global and overview maps	LMST05010046;HMDB0002596	Lipids and lipid-like molecules	Steroids and steroid derivatives	Steroidal glycosides	72504-58-6	589.304	5.91565	M+Na-2H	C30H48O10	0	72.5	neg
neg_3736	LysoPC(18:0/0:0)	metab_15380	5.72e-06	2.28e-05	1.1431	1.1459	1.2117	0.277	yes	C04230;C04317	Lipids;-	Phospholipids;-	map00565;map00564;map05231;map01100	Ether lipid metabolism;Glycerophospholipid metabolism;Choline metabolism in cancer;Metabolic pathways	Metabolism;Metabolism;Human Diseases;Metabolism	Lipid metabolism;Lipid metabolism;Cancer: overview;Global and overview maps	HMDB0010384;HMDB0011149	Lipids and lipid-like molecules	Glycerophospholipids	Glycerophosphocholines	19420-57-6;74430-89-0	568.362	7.53102	M+FA-H	C26H54NO7P	0	82.1	neg
pos_4493	5b-Cholestane-3a,7a,12a,23R,25-pentol	metab_3848	3.25e-10	1.16e-08	1.143	1.1375	0.8217	-0.2832	yes	C01571	Lipids	Fatty acids	map01100;map00061	Metabolic pathways;Fatty acid biosynthesis	Metabolism;Metabolism	Global and overview maps;Lipid metabolism	HMDB0000513;LMST01010240	Lipids and lipid-like molecules	Fatty Acyls	Fatty acids and conjugates	59906-14-8	475.34	6.63155	M+Na	C27H48O5	0	39.5	pos
neg_4474	Asparagoside A	metab_11601	0.00165	0.002611	1.1429	1.1276	1.2573	0.3304	yes	C08886	-	-	-	-	-	-	HMDB0030046	Lipids and lipid-like molecules	Fatty Acyls	Fatty acids and conjugates	14835-43-9	623.38	6.39045	M+FA-H	C33H54O8	0	52.8	neg
neg_1207	3-Sulfodeoxycholic acid	metab_7987	4.31e-05	0.000117	1.1426	1.1521	0.7431	-0.4283	yes	-	-	-	-	-	-	-	HMDB0002504;LMST05020038	Lipids and lipid-like molecules	Sphingolipids	Ceramides	67030-48-2	495.183	1.9333	M+K-2H	C23H38O7S	0	68	neg
neg_5379	Rivenprost	metab_12603	0.02253	0.02794	1.1425	1.1632	1.5701	0.6509	yes	-	-	-	-	-	-	-	HMDB0257249	Benzenoids	Benzene and substituted derivatives	Benzylethers	-	431.194	5.2579	M-H2O-H	C24H34O6S	0	60.8	neg
neg_4163	Citreoviridin	metab_11257	0.0006208	0.00109	1.1423	1.1309	0.7544	-0.4065	yes	C16766	-	-	-	-	-	-	HMDB0250305	Organoheterocyclic compounds	Pyrans	Pyranones and derivatives	25425-12-1	383.189	6.98418	M-H2O-H	C23H30O6	0	54.1	neg
neg_168	Hypoxanthine	metab_8510	9.79e-07	5.77e-06	1.1422	1.1371	0.8257	-0.2762	yes	C00262	-	-	map01100;map00230	Metabolic pathways;Purine metabolism	Metabolism;Metabolism	Global and overview maps;Nucleotide metabolism	HMDB0000157;PW_C000102	Organoheterocyclic compounds	Imidazopyrimidines	Purines and purine derivatives	68-94-0	135.03	1.5968	M-H, M+Cl	C5H4N4O	81.2	0	neg
pos_6187	Inosine,2',3'-dideoxy-	metab_5714	1.76e-06	7e-06	1.1419	1.133	0.7705	-0.3762	yes	-	-	-	-	-	-	-	HMDB0253491	Nucleosides, nucleotides, and analogues	Purine nucleosides	Purine 2'',3''-dideoxyribonucleosides	-	259.082	3.92263	M+Na	C10H12N4O3	0	54.3	pos
pos_7455	Thr Gln	metab_7110	0.002517	0.00382	1.1415	1.1527	1.3217	0.4024	yes	-	-	-	-	-	-	-	-	-	-	-	-	248.124	0.953583	M+H	C9H17N3O5	65.4	0	pos
neg_2136	Valyl-prolyl-glycyl-valyl-glycine	metab_9017	0.007084	0.009731	1.1408	1.1634	1.3493	0.4322	yes	-	-	-	-	-	-	-	HMDB0259877	Organic acids and derivatives	Carboxylic acids and derivatives	Amino acids, peptides, and analogues	-	472.241	4.24135	M+FA-H	C19H33N5O6	0	79.3	neg
pos_2861	Trans-4-Aminocyclohexanecarboxylic acid	metab_2054	2.08e-05	5.61e-05	1.1407	1.1328	0.7905	-0.3391	yes	-	-	-	-	-	-	-	HMDB0246355	Organic acids and derivatives	Carboxylic acids and derivatives	Amino acids, peptides, and analogues	-	126.092	4.5438	M+H-H2O	C7H13NO2	0	39	pos
neg_4980	Epsilon-Caprolactone	metab_12161	0.000279	0.0005443	1.1406	1.1241	0.7422	-0.4301	yes	C01880	-	-	map01220;map00930;map01120	Degradation of aromatic compounds;Caprolactam degradation;Microbial metabolism in diverse environments	Metabolism;Metabolism;Metabolism	Global and overview maps;Xenobiotics biodegradation and metabolism;Global and overview maps	HMDB0000453;HMDB0060476	Organoheterocyclic compounds	Lactones	Delta valerolactones	823-22-3;502-44-3	273.134	5.85298	2M+FA-H	C6H10O2	0	33.8	neg
neg_1605	Beta-D-ribosylnicotinate	metab_8428	5.16e-07	3.53e-06	1.1402	1.1316	0.726	-0.4619	yes	C05841	-	-	map01100;map00760	Metabolic pathways;Nicotinate and nicotinamide metabolism	Metabolism;Metabolism	Global and overview maps;Metabolism of cofactors and vitamins	HMDB0304540;HMDB0006809	Organic oxygen compounds	Organooxygen compounds	Carbohydrates and carbohydrate conjugates	4013-06-03	236.056	3.54882	M-H2O-H	C11H13NO6	0	50.4	neg
neg_886	Asparaginyl-Proline	metab_15234	0.000148	0.0003213	1.14	1.1417	1.3155	0.3956	yes	-	-	-	-	-	-	-	HMDB0028739	Organic acids and derivatives	Carboxylic acids and derivatives	Amino acids, peptides, and analogues	-	517.227	3.53313	2M-H, 2M+Hac-H	C9H15N3O4	0	63	neg
pos_7189	Melanostatin	metab_6822	0.0011	0.001831	1.1394	1.1504	1.2981	0.3764	yes	-	-	-	-	-	-	-	HMDB0005764;HMDB0254713	Organic acids and derivatives	Carboxylic acids and derivatives	Amino acids, peptides, and analogues	9083-38-9	317.218	2.52433	M+CH3OH+H	C13H24N4O3	0	42.9	pos
neg_3107	11b-Hydroxyandrost-4-ene-3,17-dione	metab_15360	0.0002973	0.0005733	1.1382	1.1464	0.7611	-0.3938	yes	C05284	-	-	map00140	Steroid hormone biosynthesis	Metabolism	Lipid metabolism	PW_C002924;HMDB0006773	Organoheterocyclic compounds	Oxazinanes	Morpholines	382-44-5	347.186	5.93142	M+FA-H	C19H26O3	0	77.3	neg
pos_6426	Lycorine	metab_5980	0.0005278	0.0009548	1.1377	1.1471	0.7283	-0.4573	yes	C08532	-	-	map00950;map01063	Isoquinoline alkaloid biosynthesis;Biosynthesis of alkaloids derived from shikimate pathway	Metabolism;Metabolism	Biosynthesis of other secondary metabolites;Chemical structure transformation maps	HMDB0254256;MJDBOTE0000964	Alkaloids and derivatives	Amaryllidaceae alkaloids	Lycorine-type amaryllidaceae alkaloids	476-28-8	305.149	3.5446	M+NH4	C16H17NO4	0	68.4	pos
pos_4525	N-Docosahexaenoyl Threonine	metab_3884	8.06e-05	0.0001814	1.1376	1.1353	0.7909	-0.3384	yes	-	-	-	-	-	-	-	HMDB0242022	Not Available	Not Available	Not Available	-	394.277	6.59177	M+H-2H2O	C26H39NO4	0	32.9	pos
neg_5375	Thromboxane B2	metab_12599	1.48e-06	7.89e-06	1.1375	1.1379	0.7667	-0.3832	yes	C05963	Lipids	Eicosanoids	map00590;map01100;map04976;map04726	Arachidonic acid metabolism;Metabolic pathways;Bile secretion;Serotonergic synapse	Metabolism;Metabolism;Organismal Systems;Organismal Systems	Lipid metabolism;Global and overview maps;Digestive system;Nervous system	HMDB0003252;PW_C001820;LMFA03030002	Lipids and lipid-like molecules	Fatty Acyls	Eicosanoids	54397-85-2	351.218	5.26573	M-H2O-H	C20H34O6	0	38.8	neg
neg_6142	7-Hydroxymitragynine	metab_13450	0.001159	0.001906	1.137	1.1461	1.3799	0.4646	yes	-	-	-	-	-	-	-	HMDB0247263	Lipids and lipid-like molecules	Prenol lipids	Diterpenoids	-	459.21	4.13948	M+FA-H	C23H30N2O5	0	41.7	neg
pos_3295	Yakuchinone-A	metab_2533	4.09e-07	2.13e-06	1.1364	1.1277	0.8063	-0.3107	yes	C20211	-	-	-	-	-	-	HMDB0259946	Phenylpropanoids and polyketides	Diarylheptanoids	Linear diarylheptanoids	78954-23-1	335.16	5.8838	M+Na	C20H24O3	0	37.9	pos
neg_5866	Prephenate	metab_13143	1.48e-07	1.37e-06	1.1346	1.1304	0.7684	-0.3801	yes	C00254	-	-	map01100;map01110;map01240;map00998;map01230;map00400;map00401;map01063;map01061;map01060	Metabolic pathways;Biosynthesis of secondary metabolites;Biosynthesis of cofactors;Biosynthesis of various secondary metabolites - part 2;Biosynthesis of amino acids;Phenylalanine, tyrosine and tryptophan biosynthesis;Novobiocin biosynthesis;Biosynthesis of alkaloids derived from shikimate pathway;Biosynthesis of phenylpropanoids;Biosynthesis of plant secondary metabolites	Metabolism;Metabolism;Metabolism;Metabolism;Metabolism;Metabolism;Metabolism;Metabolism;Metabolism;Metabolism	Global and overview maps;Global and overview maps;Global and overview maps;Biosynthesis of other secondary metabolites;Global and overview maps;Amino acid metabolism;Biosynthesis of other secondary metabolites;Chemical structure transformation maps;Chemical structure transformation maps;Chemical structure transformation maps	HMDB0012283	Organic acids and derivatives	Keto acids and derivatives	Gamma-keto acids and derivatives	87664-40-2;126-49-8	271.047	4.5145	M+FA-H	C10H10O6	0	30.9	neg
neg_4686	CDP-DG(16:0/18:1(9Z))	metab_11835	3.41e-06	1.52e-05	1.1335	1.1249	1.2622	0.3359	yes	C00269	-	-	map01100;map00564;map01110;map04070	Metabolic pathways;Glycerophospholipid metabolism;Biosynthesis of secondary metabolites;Phosphatidylinositol signaling system	Metabolism;Metabolism;Metabolism;Environmental Information Processing	Global and overview maps;Lipid metabolism;Global and overview maps;Signal transduction	PW_C003022;HMDB0006971;LMGP13010006	Lipids and lipid-like molecules	Glycerophospholipids	CDP-glycerols	-	1000.51	6.07168	M+Na-2H	C46H83N3O15P2	0	36.6	neg
pos_5716	(+/-)-11,12-Dihydroxy-5Z,8Z,14Z,17Z-eicosatetraenoic acid	metab_5192	3.51e-05	8.81e-05	1.1333	1.1349	0.7352	-0.4439	yes	C14774	-	-	map00590;map01100;map04726	Arachidonic acid metabolism;Metabolic pathways;Serotonergic synapse	Metabolism;Metabolism;Organismal Systems	Lipid metabolism;Global and overview maps;Nervous system	LMFA03060079;HMDB0002314;HMDB0242269	Lipids and lipid-like molecules	Fatty Acyls	Eicosanoids	192461-95-3	400.249	4.81707	M+ACN+Na	C20H32O4	0	70.8	pos
neg_5630	Glutamylleucylarginine	metab_12883	2.29e-05	7.02e-05	1.1333	1.1312	0.7612	-0.3936	yes	-	-	-	-	-	-	-	HMDB0252758	Organic acids and derivatives	Carboxylic acids and derivatives	Amino acids, peptides, and analogues	-	397.223	4.8801	M-H2O-H	C17H32N6O6	0	37.1	neg
neg_5677	PA(8:0/i-12:0)	metab_12933	1.87e-08	2.58e-07	1.1331	1.1267	1.2935	0.3713	yes	C00416	Lipids	Phospholipids	map01100;map00564;map01110;map00561;map05212;map05200;map04975;map04024;map05231;map04072;map04912;map04070;map04666	Metabolic pathways;Glycerophospholipid metabolism;Biosynthesis of secondary metabolites;Glycerolipid metabolism;Pancreatic cancer;Pathways in cancer;Fat digestion and absorption;cAMP signaling pathway;Choline metabolism in cancer;Phospholipase D signaling pathway;GnRH signaling pathway;Phosphatidylinositol signaling system;Fc gamma R-mediated phagocytosis	Metabolism;Metabolism;Metabolism;Metabolism;Human Diseases;Human Diseases;Organismal Systems;Environmental Information Processing;Human Diseases;Environmental Information Processing;Organismal Systems;Environmental Information Processing;Organismal Systems	Global and overview maps;Lipid metabolism;Global and overview maps;Lipid metabolism;Cancer: specific types;Cancer: overview;Digestive system;Signal transduction;Cancer: overview;Signal transduction;Endocrine system;Signal transduction;Immune system	HMDB0115685;PW_C064070	Lipids and lipid-like molecules	Glycerophospholipids	Glycerophosphates	-	501.257	4.79582	M+Na-2H	C23H45O8P	0	34.1	neg
neg_6274	LysoPE(0:0/22:6(4Z,7Z,10Z,13Z,16Z,19Z))	metab_13593	0.004112	0.005967	1.1328	1.1395	1.3583	0.4418	yes	-	-	-	-	-	-	-	HMDB0011496	Lipids and lipid-like molecules	Glycerophospholipids	Glycerophosphoethanolamines	-	562.237	3.99718	M+K-2H	C27H44NO7P	0	40.1	neg
neg_6858	Elenolide	metab_14239	1.55e-06	8.18e-06	1.1326	1.129	0.7821	-0.3545	yes	C09506	-	-	-	-	-	-	HMDB0030018	Organoheterocyclic compounds	Pyrans	Pyranones and derivatives	24582-91-0	269.067	3.3988	M+FA-H	C11H12O5	0	53	neg
pos_5836	Gabexate	metab_5324	2.88e-08	2.91e-07	1.1323	1.1248	0.7772	-0.3636	yes	-	-	-	-	-	-	-	HMDB0252569	Benzenoids	Benzene and substituted derivatives	Benzoic acids and derivatives	-	385.186	4.55178	M+ACN+Na	C16H23N3O4	0	49.5	pos
pos_5679	N-lactoyl-phenylalanine	metab_5150	0.001229	0.002016	1.1317	1.1361	1.3749	0.4594	yes	-	-	-	-	-	-	-	HMDB0062175	Organic acids and derivatives	Carboxylic acids and derivatives	Amino acids, peptides, and analogues	183241-73-8	238.107	4.88107	M+H	C12H15NO4	80	0	pos
neg_6689	N-Acetyl-1,6-diaminohexane	metab_14052	0.001796	0.00282	1.1317	1.117	1.4058	0.4914	yes	-	-	-	-	-	-	-	HMDB0255016	Organic acids and derivatives	Carboxylic acids and derivatives	Carboxylic acid derivatives	-	157.134	3.56445	M-H	C8H18N2O	0	38.4	neg
neg_5475	Xi-3-Methyl-3-cyclohexen-1-ol	metab_12710	2.34e-08	3.04e-07	1.1313	1.1294	0.7433	-0.4279	yes	-	-	-	-	-	-	-	HMDB0034372	Organic oxygen compounds	Organooxygen compounds	Alcohols and polyols	-	157.086	5.11715	M+FA-H	C7H12O	0	36.7	neg
pos_2389	6-Lactoyltetrahydropterin	metab_1534	5.81e-08	4.75e-07	1.1312	1.1304	1.2657	0.3399	yes	C04244	-	-	map01100;map00790	Metabolic pathways;Folate biosynthesis	Metabolism;Metabolism	Global and overview maps;Metabolism of cofactors and vitamins	PW_C001388;HMDB0002065	Organoheterocyclic compounds	Pteridines and derivatives	Pterins and derivatives	33405-80-0	479.214	3.36037	2M+H	C9H13N5O3	0	30.3	pos
neg_3332	9,10-DiHOME	metab_10338	3.63e-05	0.0001019	1.131	1.1252	0.7912	-0.3379	yes	C14828	-	-	map00591	Linoleic acid metabolism	Metabolism	Lipid metabolism	HMDB0004704;LMFA02000229	Lipids and lipid-like molecules	Fatty Acyls	Fatty acids and conjugates	125356-86-7	313.238	6.3203	M-H	C18H34O4	54.4	0	neg
neg_1459	Dichloroisoproterenol	metab_8266	1.75e-08	2.45e-07	1.131	1.126	0.7382	-0.4379	yes	C11772	-	-	map07214	beta-Adrenergic receptor agonists/antagonists	Drug Development	Target-based classification: G protein-coupled receptors	HMDB0251197	Benzenoids	Benzene and substituted derivatives	Halobenzenes	59-61-0	292.05	3.38312	M+FA-H	C11H15Cl2NO	0	46	neg
neg_2846	Deflazacort	metab_9801	0.005474	0.007733	1.1308	1.1158	1.3985	0.4839	yes	-	-	-	-	-	-	-	HMDB0250935	Lipids and lipid-like molecules	Steroids and steroid derivatives	Pregnane steroids	-	486.209	5.50255	M+FA-H	C25H31NO6	0	46.1	neg
neg_5681	(1R,2R,3S,1'R)-Nepetalinic acid	metab_12938	0.00012	0.0002703	1.1304	1.1196	1.311	0.3907	yes	-	-	-	-	-	-	-	HMDB0034971	Lipids and lipid-like molecules	Prenol lipids	Monoterpenoids	32603-11-5	599.305	4.78798	3M-H	C10H16O4	0	33.9	neg
neg_2888	3-Methyl-3-butenyl apiosyl-(1->6)-glucoside	metab_9847	0.005517	0.007785	1.1304	1.1436	1.5462	0.6287	yes	-	-	-	-	-	-	-	HMDB0031954	Lipids and lipid-like molecules	Fatty Acyls	Fatty acyl glycosides	198832-72-3	361.151	5.58533	M-H2O-H	C16H28O10	0	56.3	neg
neg_3343	Torvoside G	metab_10350	0.0006537	0.001142	1.1302	1.1358	1.2751	0.3506	yes	-	-	-	-	-	-	-	HMDB0030337	Lipids and lipid-like molecules	Glycerolipids	Triradylcglycerols	184777-22-8	653.391	6.3358	M+FA-H	C34H56O9	0	39	neg
neg_5643	PS(18:4(6Z,9Z,12Z,15Z)/14:1(9Z))	metab_12896	0.006142	0.008582	1.1298	1.1157	1.304	0.383	yes	C02737	Lipids	Phospholipids	map01100;map00564;map01110;map05146;map05322;map00260;map05140	Metabolic pathways;Glycerophospholipid metabolism;Biosynthesis of secondary metabolites;Amoebiasis;Systemic lupus erythematosus;Glycine, serine and threonine metabolism;Leishmaniasis	Metabolism;Metabolism;Metabolism;Human Diseases;Human Diseases;Metabolism;Human Diseases	Global and overview maps;Lipid metabolism;Global and overview maps;Infectious disease: parasitic;Immune disease;Amino acid metabolism;Infectious disease: parasitic	PW_C060893;LMGP03010428;HMDB0112486	Lipids and lipid-like molecules	Glycerophospholipids	Glycerophosphoserines	-	706.415	4.85657	M-H2O-H	C38H64NO10P	0	49.4	neg
neg_1447	2-Isopropylmalic Acid	metab_8253	3.1e-05	8.99e-05	1.1296	1.1203	0.7156	-0.4827	yes	C02504	-	-	map01100;map01110;map00290;map01210;map01230;map00620	Metabolic pathways;Biosynthesis of secondary metabolites;Valine, leucine and isoleucine biosynthesis;2-Oxocarboxylic acid metabolism;Biosynthesis of amino acids;Pyruvate metabolism	Metabolism;Metabolism;Metabolism;Metabolism;Metabolism;Metabolism	Global and overview maps;Global and overview maps;Amino acid metabolism;Global and overview maps;Global and overview maps;Carbohydrate metabolism	HMDB0000402	Lipids and lipid-like molecules	Fatty Acyls	Fatty acids and conjugates	49601-06-1	175.06	3.36742	M-H	C7H12O5	32.6	0	neg
neg_2805	Tranexamic Acid	metab_9756	8.23e-05	0.0001965	1.1294	1.1157	1.2529	0.3252	yes	C12535	-	-	-	-	-	-	PW_C008836;HMDB0014447;MJDBOTE0000780	Organic acids and derivatives	Carboxylic acids and derivatives	Amino acids, peptides, and analogues	1197-18-8	202.108	5.42703	M+FA-H	C8H15NO2	0	52.8	neg
neg_4734	11beta,17beta-Dihydroxy-4-androsten-3-one	metab_11889	5.17e-05	0.0001355	1.1292	1.1319	0.799	-0.3237	yes	C18075	-	-	map00140	Steroid hormone biosynthesis	Metabolism	Lipid metabolism	HMDB0060339	Lipids and lipid-like molecules	Steroids and steroid derivatives	Androstane steroids	1816-85-9	349.202	6.0213	M+FA-H	C19H28O3	0	82.3	neg
neg_815	2-(Malonylamino)benzoic acid	metab_15156	4.51e-06	1.88e-05	1.1291	1.116	0.8015	-0.3192	yes	C03147	-	-	-	-	-	-	HMDB0039495	Benzenoids	Benzene and substituted derivatives	Benzoic acids and derivatives	53947-84-5	222.04	3.27288	M-H2O-H, M-H	C10H9NO5	0	57	neg
neg_6273	7-Aminocephalosporanic acid	metab_13592	9.14e-07	5.46e-06	1.128	1.1258	0.7526	-0.41	yes	C07756	-	-	map01110;map00311	Biosynthesis of secondary metabolites;Penicillin and cephalosporin biosynthesis	Metabolism;Metabolism	Global and overview maps;Biosynthesis of other secondary metabolites	HMDB0247232	Organic acids and derivatives	Carboxylic acids and derivatives	Amino acids, peptides, and analogues	957-68-6	253.029	4.00502	M-H2O-H	C10H12N2O5S	0	32.1	neg
pos_7406	Lactose	metab_7735	0.003538	0.0052	1.128	1.1346	1.2856	0.3625	yes	C00243	Carbohydrates	Oligosaccharides	map01100;map04973;map02060;map02010;map00052	Metabolic pathways;Carbohydrate digestion and absorption;Phosphotransferase system (PTS);ABC transporters;Galactose metabolism	Metabolism;Organismal Systems;Environmental Information Processing;Environmental Information Processing;Metabolism	Global and overview maps;Digestive system;Membrane transport;Membrane transport;Carbohydrate metabolism	HMDB0000186;HMDB0041627;MJDBOTE0001702	Organic oxygen compounds	Organooxygen compounds	Carbohydrates and carbohydrate conjugates	63-42-3;5965-66-2	360.15	1.13533	M+NH4	C12H22O11	55.4	0	pos
pos_7320	Tyr Lys	metab_6964	0.003761	0.005483	1.1278	1.1418	1.341	0.4233	yes	-	-	-	-	-	-	-	-	-	-	-	-	310.176	1.70157	M+H	C15H23N3O4	60.4	0	pos
pos_777	Chitobiose	metab_7449	1.56e-06	6.34e-06	1.1275	1.131	1.2806	0.3569	yes	C01674	-	-	map01100;map00520;map02060;map02010	Metabolic pathways;Amino sugar and nucleotide sugar metabolism;Phosphotransferase system (PTS);ABC transporters	Metabolism;Metabolism;Environmental Information Processing;Environmental Information Processing	Global and overview maps;Carbohydrate metabolism;Membrane transport;Membrane transport	PW_C001925;HMDB0062702;HMDB0003556	Organic oxygen compounds	Organooxygen compounds	Carbohydrates and carbohydrate conjugates	35061-50-8;577-76-4	444.186	5.43447	M+NH4, M+Na	C15H26N2O12	0	66.5	pos
neg_2677	Strigol	metab_9614	5.64e-05	0.000145	1.1275	1.1233	0.7524	-0.4105	yes	C09190	-	-	map00906;map01110;map01070	Carotenoid biosynthesis;Biosynthesis of secondary metabolites;Biosynthesis of plant hormones	Metabolism;Metabolism;Metabolism	Metabolism of terpenoids and polyketides;Global and overview maps;Chemical structure transformation maps	HMDB0036677	Lipids and lipid-like molecules	Prenol lipids	Terpene lactones	11017-56-4	383.092	5.22158	M+K-2H	C19H22O6	0	46	neg
neg_1680	Mopidamol	metab_8511	0.0008011	0.001372	1.127	1.1283	1.3307	0.4122	yes	-	-	-	-	-	-	-	HMDB0254878	Organic nitrogen compounds	Organonitrogen compounds	Amines	-	456.21	3.6428	M+Cl	C19H31N7O4	0	50.6	neg
neg_2653	3-Hydroxysebacic Acid	metab_9588	2.72e-08	3.4e-07	1.127	1.125	0.7923	-0.3359	yes	-	-	-	-	-	-	-	HMDB0000350	Organic acids and derivatives	Hydroxy acids and derivatives	Medium-chain hydroxy acids and derivatives	446881-43-2	217.108	5.18383	M-H	C10H18O5	44.8	0	neg
neg_4909	3-Oxo-2-(2-entenyl)cyclopentaneoctanoic acid	metab_12082	6.32e-07	4.15e-06	1.126	1.1249	0.7731	-0.3712	yes	C04780	-	-	map01100;map00592;map01110;map01070	Metabolic pathways;alpha-Linolenic acid metabolism;Biosynthesis of secondary metabolites;Biosynthesis of plant hormones	Metabolism;Metabolism;Metabolism;Metabolism	Global and overview maps;Lipid metabolism;Global and overview maps;Chemical structure transformation maps	HMDB0301805	Lipids and lipid-like molecules	Fatty Acyls	Eicosanoids	204135-86-4	339.218	5.9	M+FA-H	C18H30O3	0	45.3	neg
pos_2228	Leu Glu Gly	metab_1358	2.11e-05	5.68e-05	1.1247	1.119	1.2506	0.3227	yes	-	-	-	-	-	-	-	-	-	-	-	-	318.166	3.01718	M+H	C13H23N3O6	52.5	0	pos
pos_3175	Uralenolide	metab_2403	1.72e-08	2.09e-07	1.1246	1.1235	1.3585	0.442	yes	-	-	-	-	-	-	-	HMDB0038797	Lipids and lipid-like molecules	Steroids and steroid derivatives	Not Available	111150-27-7	513.299	5.50647	M+2Na-H	C30H44O4	0	47.5	pos
pos_4397	Risbitin	metab_3741	1.72e-05	4.77e-05	1.1243	1.1237	1.2272	0.2954	yes	C09715	-	-	-	-	-	-	HMDB0302980	Organic oxygen compounds	Organooxygen compounds	Alcohols and polyols	-	508.34	6.8064	2M+ACN+Na	C14H22O2	0	51.8	pos
pos_596	Indole-3-Carboxylic Acid	metab_5461	2.36e-08	2.58e-07	1.124	1.1196	0.8246	-0.2782	yes	C19837	-	-	-	-	-	-	HMDB0003320;MJDBOTE0000454	Organoheterocyclic compounds	Indoles and derivatives	Indolecarboxylic acids and derivatives	771-50-6	162.055	3.76145	M+H-H2O, M+H	C9H7NO2	51	0	pos
neg_6622	Ribalinium	metab_13979	0.003941	0.005736	1.1238	1.1436	1.3396	0.4218	yes	C10735	-	-	-	-	-	-	HMDB0033346	Organoheterocyclic compounds	Quinolines and derivatives	Dihydrofuranoquinolines	6883-22-3	335.136	3.62713	M+FA-H	C16H20NO4+	0	37.4	neg
neg_7397	Glutaminylalanine	metab_14833	0.002432	0.003704	1.1236	1.1179	1.3101	0.3897	yes	-	-	-	-	-	-	-	HMDB0028790	Organic acids and derivatives	Carboxylic acids and derivatives	Amino acids, peptides, and analogues	16874-70-7	216.099	0.9539	M-H	C8H15N3O4	0	63.7	neg
neg_4892	Evogliptin	metab_12063	0.01282	0.01657	1.1235	1.1202	0.6812	-0.5538	yes	-	-	-	-	-	-	-	HMDB0252139	Organic acids and derivatives	Peptidomimetics	Hybrid peptides	-	446.193	5.90783	M+FA-H	C19H26F3N3O3	0	60.6	neg
neg_2914	Pelargonic acid	metab_9877	8.13e-05	0.0001947	1.1234	1.1138	0.7432	-0.4282	yes	C01601	-	-	-	-	-	-	LMFA01010009;HMDB0000847	Lipids and lipid-like molecules	Fatty Acyls	Fatty acids and conjugates	112-05-0	203.128	5.6461	M+FA-H	C9H18O2	0	38.1	neg
pos_6599	Diflucortolone valerate	metab_6169	6.5e-07	3.11e-06	1.1231	1.123	0.8081	-0.3073	yes	-	-	-	-	-	-	-	HMDB0251261	Lipids and lipid-like molecules	Steroids and steroid derivatives	Pregnane steroids	-	511.291	3.28113	M+CH3OH+H	C27H36F2O5	0	34.6	pos
neg_2833	4-Chloro-2-nitrobenzylalcohol	metab_9787	0.0003032	0.0005816	1.1229	1.1317	0.7595	-0.3968	yes	-	-	-	-	-	-	-	HMDB0249542	Organoheterocyclic compounds	Benzoxazoles	Not Available	-	568.262	5.47903	M+FA-H	C29H37N3O6	0	59.4	neg
neg_2700	N-Lactoylleucine	metab_9641	3.38e-08	4.06e-07	1.1227	1.1187	0.7833	-0.3523	yes	-	-	-	-	-	-	-	HMDB0062176	Organic acids and derivatives	Carboxylic acids and derivatives	Amino acids, peptides, and analogues	210769-82-7	184.097	5.26573	M-H2O-H	C9H17NO4	0	32.1	neg
pos_5404	2-(2-Hydroxyethyl)phenyl hydrogen sulfate	metab_4851	9.61e-07	4.32e-06	1.1226	1.1236	0.7433	-0.428	yes	-	-	-	-	-	-	-	HMDB0304908	Organic acids and derivatives	Organic sulfuric acids and derivatives	Arylsulfates	-	260.058	5.44247	M+ACN+H	C8H10O5S	0	62	pos
pos_6338	Prolyl-Threonine	metab_5882	0.011	0.01463	1.1223	1.146	1.3451	0.4277	yes	-	-	-	-	-	-	-	HMDB0029027	Organic acids and derivatives	Carboxylic acids and derivatives	Amino acids, peptides, and analogues	-	474.256	3.66497	2M+ACN+H	C9H16N2O4	0	50.7	pos
pos_7337	Dihydro-3-hydroxy-4,4-dimethyl-2(3H)-Furanone	metab_6982	9.25e-06	2.82e-05	1.1222	1.1176	0.8133	-0.2981	yes	-	-	-	-	-	-	-	-	-	-	-	-	148.097	1.5976	M+NH4	C6H10O3	0	30.2	pos
pos_4856	Antroquinonol	metab_4246	3.59e-06	1.27e-05	1.1219	1.1235	0.8266	-0.2747	yes	-	-	-	-	-	-	-	HMDB0248495	Lipids and lipid-like molecules	Prenol lipids	Diterpenoids	-	413.266	6.1868	M+Na	C24H38O4	0	30.1	pos
pos_7466	Asn Thr	metab_7122	0.006835	0.009477	1.1208	1.1363	1.3139	0.3939	yes	-	-	-	-	-	-	-	-	-	-	-	-	234.108	0.945833	M+H	C8H15N3O5	75.2	0	pos
pos_2013	Serylvalylglycylglutamic acid	metab_1123	0.001513	0.002428	1.1206	1.1259	1.2983	0.3766	yes	-	-	-	-	-	-	-	HMDB0302163	Organic acids and derivatives	Carboxylic acids and derivatives	Amino acids, peptides, and analogues	-	373.172	2.56425	M+H-H2O	C15H26N4O8	0	43.1	pos
pos_73	Gamma-Glutamylalanine	metab_6940	0.0001478	0.0003099	1.1196	1.122	1.2388	0.309	yes	C03740	-	-	map01100;map00480	Metabolic pathways;Glutathione metabolism	Metabolism;Metabolism	Global and overview maps;Metabolism of other amino acids	HMDB0036301;HMDB0006248	Organic acids and derivatives	Carboxylic acids and derivatives	Amino acids, peptides, and analogues	5875-41-2	219.098	0.953583	M+H, M+Na, M+H-H2O	C8H14N2O5	0	40.3	pos
neg_1735	N,N-Bis(1-hydroxyethyl)nitrous amide	metab_8572	0.0007526	0.001298	1.1194	1.1195	1.33	0.4114	yes	-	-	-	-	-	-	-	HMDB0257609	Organic nitrogen compounds	Organonitrogen compounds	Organic nitroso compounds	-	401.204	3.70615	3M-H	C4H10N2O3	0	32.7	neg
neg_5310	9alpha-(3-Methylbutanoyloxy)-4S-hydroxy-10(14)-oplopen-3-one	metab_12528	4.97e-07	3.44e-06	1.1185	1.1157	0.8105	-0.3031	yes	-	-	-	-	-	-	-	HMDB0039171	Lipids and lipid-like molecules	Prenol lipids	Sesquiterpenoids	348113-04-2	381.228	5.3423	M+FA-H	C20H32O4	0	38.3	neg
neg_1530	(2Z)-dec-2-enedioylcarnitine	metab_8345	0.0001304	0.0002887	1.1181	1.1139	1.2936	0.3714	yes	-	-	-	-	-	-	-	HMDB0241084	Lipids and lipid-like molecules	Fatty Acyls	Fatty acid esters	-	380.146	3.46212	M+K-2H	C17H29NO6	0	39.2	neg
neg_4812	(1(10)E,4E,6a,9b)-9-(2-Methylpropanoyloxy)-1(10),4,11(13)-germacratrien-12,6-olide	metab_11976	5.47e-05	0.0001415	1.118	1.1201	0.7779	-0.3624	yes	-	-	-	-	-	-	-	HMDB0031373	Lipids and lipid-like molecules	Prenol lipids	Terpene lactones	-	363.181	5.95487	M+FA-H	C19H26O4	0	38.8	neg
pos_7445	L-Asparagine	metab_7100	0.001866	0.002925	1.1177	1.1233	1.2785	0.3544	yes	C00152	Peptides	Amino acids	map01100;map04978;map01110;map00460;map01230;map00250;map04974;map00970;map05230;map01060	Metabolic pathways;Mineral absorption;Biosynthesis of secondary metabolites;Cyanoamino acid metabolism;Biosynthesis of amino acids;Alanine, aspartate and glutamate metabolism;Protein digestion and absorption;Aminoacyl-tRNA biosynthesis;Central carbon metabolism in cancer;Biosynthesis of plant secondary metabolites	Metabolism;Organismal Systems;Metabolism;Metabolism;Metabolism;Metabolism;Organismal Systems;Genetic Information Processing;Human Diseases;Metabolism	Global and overview maps;Digestive system;Global and overview maps;Metabolism of other amino acids;Global and overview maps;Amino acid metabolism;Digestive system;Translation;Cancer: overview;Chemical structure transformation maps	PW_C000110;HMDB0251512;HMDB0000168;MJDBOTE0000518	Organic acids and derivatives	Carboxylic acids and derivatives	Amino acids, peptides, and analogues	70-47-3	133.061	0.969417	M+H	C4H8N2O3	56.5	0	pos
pos_6328	N-Eicosapentaenoyl Proline	metab_5871	3.28e-05	8.29e-05	1.1175	1.1195	1.2806	0.3568	yes	-	-	-	-	-	-	-	HMDB0242078	Not Available	Not Available	Not Available	-	444.245	3.68145	M+2Na-H	C25H37NO3	0	52.1	pos
pos_2227	N-(2-Hydroxyisobutyl)-2,4,8,10,12-tetradecapentaenamide	metab_1357	0.0009237	0.001567	1.1174	1.1304	1.2555	0.3283	yes	-	-	-	-	-	-	-	HMDB0031183;LMFA08020186	Lipids and lipid-like molecules	Fatty Acyls	Fatty amides	127514-62-9	312.192	3.01718	M+Na	C18H27NO2	0	47.2	pos
pos_3459	Deoxycholylarginine	metab_2712	5.52e-06	1.83e-05	1.1173	1.1202	1.2617	0.3354	yes	-	-	-	-	-	-	-	HMDB0242418	Not Available	Not Available	Not Available	-	549.401	6.1868	M+H	C30H52N4O5	0	42.3	pos
neg_5973	Dynasore	metab_13261	0.01089	0.01428	1.1173	1.1175	0.6593	-0.6009	yes	-	-	-	-	-	-	-	HMDB0251652	Benzenoids	Naphthalenes	Naphthalenecarboxylic acids and derivatives	-	343.071	4.36738	M+Na-2H	C18H14N2O4	0	46.4	neg
neg_3152	N-[(3a,5b,7b)-7-hydroxy-24-oxo-3-(sulfooxy)cholan-24-yl]-Glycine	metab_10139	0.002109	0.003247	1.1169	1.11	1.2553	0.3281	yes	-	-	-	-	-	-	-	HMDB0002409	Lipids and lipid-like molecules	Steroids and steroid derivatives	Cholestane steroids	133429-88-6	510.253	5.9627	M-H2O-H	C26H43NO8S	0	51.2	neg
neg_5127	(4S,8R)-8,9-Dihydroxy-p-menth-1(6)-en-2-one	metab_12325	2.09e-05	6.48e-05	1.1168	1.1075	0.7585	-0.3988	yes	-	-	-	-	-	-	-	HMDB0039052	Lipids and lipid-like molecules	Prenol lipids	Monoterpenoids	402593-42-4	229.108	5.63138	M+FA-H	C10H16O3	0	72.4	neg
pos_5109	Dialdehyde	metab_4525	9.29e-06	2.83e-05	1.1163	1.1142	0.7776	-0.363	yes	C11678	-	-	map00901	Indole alkaloid biosynthesis	Metabolism	Biosynthesis of other secondary metabolites	HMDB0251125	Alkaloids and derivatives	Harmala alkaloids	Not Available	85955-83-5	401.207	5.9638	M+CH3OH+H	C21H24N2O4	0	59.4	pos
neg_2314	Isoleucylhydroxyproline	metab_9214	4.65e-06	1.93e-05	1.1158	1.1046	1.2989	0.3773	yes	-	-	-	-	-	-	-	HMDB0028908	Organic acids and derivatives	Carboxylic acids and derivatives	Amino acids, peptides, and analogues	90965-80-3	289.14	4.5596	M+FA-H	C11H20N2O4	0	55.3	neg
neg_5810	Harmalan	metab_13082	0.0002523	0.0005006	1.1156	1.1199	0.6949	-0.5252	yes	-	-	-	-	-	-	-	HMDB0029834	Alkaloids and derivatives	Harmala alkaloids	Not Available	525-41-7	183.092	4.59687	M-H	C12H12N2	0	65.8	neg
pos_92	Gly Leu Val	metab_7606	0.0001578	0.0003275	1.115	1.1117	1.2178	0.2843	yes	-	-	-	-	-	-	-	-	-	-	-	-	288.192	3.68943	M+H, M+Na, 2M+H	C13H25N3O4	78	0	pos
pos_3659	7alpha,12alpha-Dihydroxycholest-4-en-3-one	metab_2929	1.24e-06	5.23e-06	1.115	1.1069	0.8113	-0.3018	yes	C17339	-	-	map01100;map00120	Metabolic pathways;Primary bile acid biosynthesis	Metabolism;Metabolism	Global and overview maps;Lipid metabolism	HMDB0247407;LMST04030114	Lipids and lipid-like molecules	Steroids and steroid derivatives	Cholestane steroids	-	399.325	6.82223	M+H-H2O	C27H44O3	0	49.5	pos
pos_2020	3-Hydroxyanthranilic acid	metab_1131	0.00117	0.001934	1.1147	1.0995	0.7688	-0.3793	yes	C00632	-	-	map01100;map00627;map00380;map01120;map01240	Metabolic pathways;Aminobenzoate degradation;Tryptophan metabolism;Microbial metabolism in diverse environments;Biosynthesis of cofactors	Metabolism;Metabolism;Metabolism;Metabolism;Metabolism	Global and overview maps;Xenobiotics biodegradation and metabolism;Amino acid metabolism;Global and overview maps;Global and overview maps	HMDB0001476;PW_C001137	Benzenoids	Benzene and substituted derivatives	Benzoic acids and derivatives	548-93-6	154.05	2.58815	M+H	C7H7NO3	56.9	0	pos
pos_6333	Isoleucyl-prolyl-proline	metab_5877	4.05e-05	9.94e-05	1.1144	1.1193	1.2232	0.2907	yes	-	-	-	-	-	-	-	HMDB0253021	Organic acids and derivatives	Carboxylic acids and derivatives	Amino acids, peptides, and analogues	-	326.207	3.67295	M+H	C16H27N3O4	0	60.8	pos
neg_3210	CDP-DG(18:2(9Z,12Z)/18:1(9Z))	metab_10204	0.003201	0.004748	1.1143	1.1136	1.4529	0.5389	yes	C00269	-	-	map01100;map00564;map01110;map04070	Metabolic pathways;Glycerophospholipid metabolism;Biosynthesis of secondary metabolites;Phosphatidylinositol signaling system	Metabolism;Metabolism;Metabolism;Environmental Information Processing	Global and overview maps;Lipid metabolism;Global and overview maps;Signal transduction	HMDB0115968;PW_C063111	Lipids and lipid-like molecules	Glycerophospholipids	CDP-glycerols	-	984.518	6.06387	M-H2O-H	C48H83N3O15P2	0	43.4	neg
neg_1368	Phenylalanyl-Gamma-glutamate	metab_8165	0.0004426	0.0008062	1.1143	1.1151	1.2933	0.371	yes	-	-	-	-	-	-	-	HMDB0029009	Organic acids and derivatives	Carboxylic acids and derivatives	Amino acids, peptides, and analogues	-	292.13	3.2807	M-H	C14H19N3O4	0	58.9	neg
pos_7119	3-O-Demethylfortimicin A	metab_6745	5.7e-05	0.0001336	1.1137	1.1187	0.7408	-0.4329	yes	-	-	-	-	-	-	-	HMDB0245956	Organic oxygen compounds	Organooxygen compounds	Carbohydrates and carbohydrate conjugates	-	356.229	2.66798	M+H-2H2O	C16H33N5O6	0	71.8	pos
neg_5784	N-Acetylleucylalanylserine	metab_13052	0.001757	0.002765	1.1137	1.1181	1.323	0.4038	yes	-	-	-	-	-	-	-	-	-	-	-	-	330.167	4.6258	M-H	C14H25N3O6	49.1	0	neg
pos_5686	Acetaminophen cystein	metab_5158	0.0004555	0.000838	1.1134	1.1052	1.3369	0.4189	yes	-	-	-	-	-	-	-	PW_C040628;HMDB0060559	Organic acids and derivatives	Carboxylic acids and derivatives	Amino acids, peptides, and analogues	-	237.069	4.87307	M+H-H2O	C11H14N2O3S	0	31.9	pos
neg_5692	1,2-Cyclohexanedicarboxylic acid	metab_12950	1.36e-07	1.28e-06	1.1134	1.1111	0.7676	-0.3817	yes	-	-	-	-	-	-	-	HMDB0250649	Organic acids and derivatives	Carboxylic acids and derivatives	Dicarboxylic acids and derivatives	-	171.065	4.7733	M-H	C8H12O4	0	32.4	neg
neg_3271	Ibutamoren	metab_10270	7.1e-06	2.71e-05	1.1132	1.1169	0.8253	-0.2769	yes	-	-	-	-	-	-	-	HMDB0253337	Organic acids and derivatives	Carboxylic acids and derivatives	Amino acids, peptides, and analogues	-	509.219	6.1884	M-H2O-H	C27H36N4O5S	0	30.9	neg
neg_7360	Diethyl Hydrogen Phosphate	metab_14793	1.73e-06	8.9e-06	1.113	1.1216	1.2242	0.2919	yes	C06608	-	-	map00627	Aminobenzoate degradation	Metabolism	Xenobiotics biodegradation and metabolism	HMDB0012209	Organic acids and derivatives	Organic phosphoric acids and derivatives	Phosphate esters	598-02-7	199.037	0.993033	M+FA-H	C4H11O4P	36.7	0	neg
neg_7084	Beta-D-Xylopyranosyl-(1->5)-alpha-L-arabinofuranosyl-(1->5)-L-arabinose	metab_14491	0.0001233	0.0002762	1.1129	1.1102	1.2592	0.3326	yes	-	-	-	-	-	-	-	HMDB0038860	Organic oxygen compounds	Organooxygen compounds	Carbohydrates and carbohydrate conjugates	79403-08-0	413.131	3.20965	M-H	C15H26O13	0	64.7	neg
neg_3432	24-Epibrassinolide	metab_10449	9.52e-07	5.64e-06	1.1127	1.1048	0.8173	-0.291	yes	C11049	-	-	-	-	-	-	HMDB0034081;HMDB0041130	Lipids and lipid-like molecules	Steroids and steroid derivatives	Steroid lactones	72962-43-7;78821-43-9	479.338	6.49982	M-H	C28H48O6	0	30.7	neg
pos_2578	Norethindrone	metab_1744	3.69e-05	9.21e-05	1.1124	1.1045	0.7654	-0.3857	yes	C05028	-	-	-	-	-	-	LMST02030097;HMDB0014855	Lipids and lipid-like molecules	Steroids and steroid derivatives	Estrane steroids	68-22-4	321.181	3.80997	M+Na	C20H26O2	0	36.7	pos
neg_7407	Oxiracetam	metab_14845	8.73e-06	3.19e-05	1.1117	1.1118	1.2322	0.3013	yes	-	-	-	-	-	-	-	HMDB0255986	Organic acids and derivatives	Carboxylic acids and derivatives	Amino acids, peptides, and analogues	-	203.067	0.946067	M+FA-H	C6H10N2O3	0	46.4	neg
pos_4824	3a,7a,12a-Trihydroxy-5b-cholestan-26-al	metab_4211	3.9e-06	1.36e-05	1.1116	1.1118	0.8219	-0.283	yes	C01301	-	-	map01100;map00120	Metabolic pathways;Primary bile acid biosynthesis	Metabolism;Metabolism	Global and overview maps;Lipid metabolism	PW_C001913;HMDB0003533	Lipids and lipid-like molecules	Steroids and steroid derivatives	Bile acids, alcohols and derivatives	3836-01-09	457.331	6.21863	M+Na	C27H46O4	0	60.3	pos
pos_6325	Gly-Ile	metab_5868	2.93e-08	2.93e-07	1.1113	1.1035	1.2813	0.3576	yes	-	-	-	-	-	-	-	HMDB0028844	Organic acids and derivatives	Carboxylic acids and derivatives	Amino acids, peptides, and analogues	-	171.113	3.68943	M+H-H2O	C8H16N2O3	52	0	pos
pos_2999	Norfloxacin	metab_2206	1.76e-06	7e-06	1.1112	1.1051	0.758	-0.3997	yes	C06687	Antibiotics	Quinolones	map02010	ABC transporters	Environmental Information Processing	Membrane transport	HMDB0015192	Organic acids and derivatives	Carboxylic acids and derivatives	Amino acids, peptides, and analogues	70458-96-7	337.165	4.96975	M+NH4	C16H18FN3O3	0	55.5	pos
pos_3258	4-Methylumbelliferone	metab_2493	1.1e-07	7.55e-07	1.1112	1.1055	0.7962	-0.3288	yes	C03081	-	-	-	-	-	-	HMDB0059622;MJDBOTE0001043	Phenylpropanoids and polyketides	Coumarins and derivatives	Hydroxycoumarins	90-33-5	194.081	5.7721	M+NH4	C10H8O3	0	68.7	pos
neg_5843	Ile-Val-Val	metab_13118	7.65e-05	0.0001856	1.1108	1.1059	1.2883	0.3655	yes	-	-	-	-	-	-	-	HMDB0304801	Organic acids and derivatives	Carboxylic acids and derivatives	Amino acids, peptides, and analogues	-	328.224	4.54393	M-H	C16H31N3O4	0	63.3	neg
pos_6639	Phe Glu Thr	metab_6214	0.0007259	0.001263	1.1104	1.1176	1.3075	0.3868	yes	-	-	-	-	-	-	-	-	-	-	-	-	396.176	3.22538	M+H	C18H25N3O7	77.8	0	pos
neg_619	2-(8-hydroxyoctyl)-6-Methoxybenzoic Acid	metab_13502	4.76e-05	0.0001267	1.1102	1.1123	0.7711	-0.3749	yes	-	-	-	-	-	-	-	-	-	-	-	-	279.16	6.04047	M-H, M+FA-H	C16H24O4	57.9	0	neg
neg_6350	Delphinidin	metab_13678	2.7e-06	1.26e-05	1.11	1.109	0.8077	-0.308	yes	C05908	-	-	map00942;map00941;map01110	Anthocyanin biosynthesis;Flavonoid biosynthesis;Biosynthesis of secondary metabolites	Metabolism;Metabolism;Metabolism	Biosynthesis of other secondary metabolites;Biosynthesis of other secondary metabolites;Global and overview maps	LMPK12010001;HMDB0003074	Phenylpropanoids and polyketides	Flavonoids	Hydroxyflavonoids	528-53-0;13270-61-6	324.023	3.91105	M+Na-2H	C15H11O7+	0	31.7	neg
pos_5495	Ergosterol	metab_4949	4.69e-06	1.6e-05	1.1099	1.1056	1.2732	0.3485	yes	C01694	Steroids	28-Carbon atoms	map01100;map01110;map00100	Metabolic pathways;Biosynthesis of secondary metabolites;Steroid biosynthesis	Metabolism;Metabolism;Metabolism	Global and overview maps;Global and overview maps;Lipid metabolism	HMDB0000878;LMST01030093	Lipids and lipid-like molecules	Steroids and steroid derivatives	Ergostane steroids	57-87-4	441.307	5.25775	M+2Na-H	C28H44O	0	37.5	pos
pos_5416	2-Hydroxyundec-5-enoylcarnitine	metab_4864	8.92e-05	0.0001985	1.1089	1.0965	0.7686	-0.3796	yes	-	-	-	-	-	-	-	HMDB0241168	Lipids and lipid-like molecules	Fatty Acyls	Fatty acid esters	-	344.243	5.41047	M+H	C18H33NO5	0	36.3	pos
neg_5854	(3Z,5E,7E)-Decatrienoylcarnitine	metab_13130	2.05e-06	1.01e-05	1.1067	1.0981	1.2985	0.3769	yes	-	-	-	-	-	-	-	HMDB0241124	Lipids and lipid-like molecules	Fatty Acyls	Fatty acid esters	-	330.167	4.52827	M+Na-2H	C17H27NO4	0	41	neg
neg_7252	D-erythro-L-galacto-Nonulose	metab_14676	2.12e-06	1.03e-05	1.1058	1.0977	1.2204	0.2874	yes	-	-	-	-	-	-	-	HMDB0029955	Organic oxygen compounds	Organooxygen compounds	Carbohydrates and carbohydrate conjugates	-	251.077	1.69075	M-H2O-H	C9H18O9	0	37.7	neg
neg_3027	4-Hydroxyphenylpyruvic Acid	metab_10001	0.0001111	0.0002535	1.1053	1.0985	0.7637	-0.3889	yes	C01179	-	-	map01100;map01110;map01240;map01210;map00130;map01055;map00998;map01230;map00950;map00350;map00261;map00400;map00401;map01063;map01060	Metabolic pathways;Biosynthesis of secondary metabolites;Biosynthesis of cofactors;2-Oxocarboxylic acid metabolism;Ubiquinone and other terpenoid-quinone biosynthesis;Biosynthesis of vancomycin group antibiotics;Biosynthesis of various secondary metabolites - part 2;Biosynthesis of amino acids;Isoquinoline alkaloid biosynthesis;Tyrosine metabolism;Monobactam biosynthesis;Phenylalanine, tyrosine a…	Metabolism;Metabolism;Metabolism;Metabolism;Metabolism;Metabolism;Metabolism;Metabolism;Metabolism;Metabolism;Metabolism;Metabolism;Metabolism;Metabolism;Metabolism	Global and overview maps;Global and overview maps;Global and overview maps;Global and overview maps;Metabolism of cofactors and vitamins;Metabolism of terpenoids and polyketides;Biosynthesis of other secondary metabolites;Global and overview maps;Biosynthesis of other secondary metabolites;Amino acid metabolism;Biosynthesis of other secondary metabolites;Amino acid metabolism;Biosynthesis of othe…	HMDB0000707;PW_C000558	Benzenoids	Benzene and substituted derivatives	Phenylpyruvic acid derivatives	156-39-8	179.034	5.86083	M-H	C9H8O4	95.6	0	neg
neg_6063	Tyrosine lactate	metab_13362	0.0002618	0.0005156	1.1044	1.0869	1.2582	0.3313	yes	-	-	-	-	-	-	-	HMDB0259352	Organic acids and derivatives	Carboxylic acids and derivatives	Amino acids, peptides, and analogues	-	252.088	4.23352	M-H	C12H15NO5	0	59.2	neg
pos_1075	Diterpene alkaloid	metab_85	0.003571	0.00524	1.1037	1.0863	0.7455	-0.4236	yes	-	-	-	-	-	-	-	HMDB0251489	Lipids and lipid-like molecules	Prenol lipids	Diterpenoids	-	406.295	7.7755	M+H-H2O, M+H	C24H39NO4	0	58.7	pos
pos_5561	Barogenin	metab_5022	3.71e-05	9.25e-05	1.103	1.1082	1.328	0.4093	yes	-	-	-	-	-	-	-	HMDB0034403	Lipids and lipid-like molecules	Steroids and steroid derivatives	Bile acids, alcohols and derivatives	64161-55-3	475.276	5.12177	M+2Na-H	C27H42O4	0	35.9	pos
pos_5290	Iloprost R-isomer	metab_4724	6.83e-10	1.99e-08	1.1028	1.1012	0.8063	-0.3106	yes	-	-	-	-	-	-	-	HMDB0259545	Lipids and lipid-like molecules	Fatty Acyls	Eicosanoids	-	399.192	5.69948	M+K	C22H32O4	0	51.8	pos
pos_7246	N-Succinyl-L,L-2,6-diaminopimelate	metab_6882	1e-08	1.4e-07	1.1025	1.1009	1.2757	0.3513	yes	C04421	-	-	map01100;map01230;map00300;map01120	Metabolic pathways;Biosynthesis of amino acids;Lysine biosynthesis;Microbial metabolism in diverse environments	Metabolism;Metabolism;Metabolism;Metabolism	Global and overview maps;Global and overview maps;Amino acid metabolism;Global and overview maps	HMDB0012267	Organic acids and derivatives	Carboxylic acids and derivatives	Amino acids, peptides, and analogues	26605-36-7	332.145	1.92377	M+ACN+H	C11H18N2O7	0	65.5	pos
pos_6826	Cyclo(glycylleucylvalylleucylprolylseryl)	metab_6420	5.41e-08	4.55e-07	1.1022	1.1025	1.238	0.308	yes	-	-	-	-	-	-	-	HMDB0303709	Organic acids and derivatives	Carboxylic acids and derivatives	Amino acids, peptides, and analogues	-	611.315	2.97735	M+2Na-H	C27H46N6O7	0	66.1	pos
neg_6383	1-(2-Hydroxyethyl)-2-(hydroxymethyl)piperidine-3,4,5-triol	metab_13714	4.84e-06	1.99e-05	1.1016	1.098	0.7937	-0.3334	yes	-	-	-	-	-	-	-	HMDB0243780	Organoheterocyclic compounds	Piperidines	Not Available	-	228.087	3.8876	M+Na-2H	C8H17NO5	0	32.1	neg
pos_5773	Saxitoxin	metab_5254	9.69e-08	6.89e-07	1.1015	1.0993	0.8002	-0.3215	yes	C13757	-	-	-	-	-	-	HMDB0029368	Phenylpropanoids and polyketides	Saxitoxins, gonyautoxins, and derivatives	Not Available	35523-89-8	264.123	4.67972	M+H-2H2O	C10H17N7O4	0	38.8	pos
neg_5095	2-Acetyl-1-ethylpyrrole	metab_12289	1.24e-06	6.91e-06	1.1004	1.1005	0.7596	-0.3967	yes	-	-	-	-	-	-	-	HMDB0029759	Organic oxygen compounds	Organooxygen compounds	Carbonyl compounds	39741-41-8	136.076	5.68528	M-H	C8H11NO	0	34.1	neg
pos_1303	(9S,10E,12S,13S)-9,12,13-Trihydroxy-10-octadecenoic acid	metab_338	0.0002596	0.0005072	1.1001	1.0864	0.8131	-0.2985	yes	-	-	-	-	-	-	-	HMDB0038555	Lipids and lipid-like molecules	Fatty Acyls	Fatty acids and conjugates	97134-11-7	295.226	6.09132	M+H-2H2O, M+H	C18H34O5	0	47.5	pos
neg_2547	Mofebutazone	metab_9470	0.008927	0.01192	1.0995	1.0737	0.6895	-0.5364	yes	-	-	-	-	-	-	-	HMDB0254828	Benzenoids	Benzene and substituted derivatives	Not Available	-	267.091	5.00087	M+Cl	C13H16N2O2	0	33.1	neg
pos_7142	4-Amino-1-piperidinecarboxylic acid	metab_6771	0.007705	0.01059	1.099	1.1191	1.3453	0.4279	yes	C16837	-	-	-	-	-	-	HMDB0060385	Organoheterocyclic compounds	Piperidines	Piperidinecarboxylic acids and derivatives	959317-82-9	289.187	2.61212	2M+H	C6H12N2O2	0	42.9	pos
neg_1219	Glutaminylmethionine	metab_8000	0.006873	0.009482	1.0989	1.1161	1.3479	0.4307	yes	-	-	-	-	-	-	-	HMDB0028803	Organic acids and derivatives	Carboxylic acids and derivatives	Amino acids, peptides, and analogues	114659-59-5	276.102	2.38757	M-H	C10H19N3O4S	0	62.8	neg
pos_1468	Tryptophyl-Asparagine	metab_520	0.02276	0.02861	1.0986	1.1369	1.3946	0.4798	yes	-	-	-	-	-	-	-	HMDB0029078	Organic acids and derivatives	Carboxylic acids and derivatives	Amino acids, peptides, and analogues	-	319.14	3.43215	M+H, M+CH3OH+H	C15H18N4O4	0	60.4	pos
neg_5897	Gibberellin A44	metab_13177	3.11e-09	6.51e-08	1.0985	1.0958	1.3397	0.4219	yes	C12308	-	-	-	-	-	-	HMDB0036901;LMPR0104170030	Lipids and lipid-like molecules	Prenol lipids	Diterpenoids	36434-15-8	381.145	4.46347	M+Cl	C20H26O5	0	89.3	neg
pos_3078	(R)-Laudanidine	metab_2295	0.005537	0.007801	1.0983	1.1283	0.6918	-0.5315	yes	C17592	-	-	map00950;map01110	Isoquinoline alkaloid biosynthesis;Biosynthesis of secondary metabolites	Metabolism;Metabolism	Biosynthesis of other secondary metabolites;Global and overview maps	HMDB0030211	Organoheterocyclic compounds	Isoquinolines and derivatives	Benzylisoquinolines	301-21-3	385.212	5.20977	M+ACN+H	C20H25NO4	0	39.7	pos
pos_3128	Citronellyl beta-sophoroside	metab_2351	0.01152	0.01524	1.0982	1.0844	0.6928	-0.5294	yes	-	-	-	-	-	-	-	HMDB0032839	Lipids and lipid-like molecules	Prenol lipids	Terpene glycosides	209681-41-4	503.242	5.3624	M+Na	C22H40O11	0	82.7	pos
neg_7333	Malic Acid	metab_15381	0.0002275	0.0004597	1.098	1.1045	1.2195	0.2863	yes	C00149	Organic acids	Carboxylic acids	map01110;map05211;map01200;map00620;map00020;map00630;map04964;map00710;map04922;map01066;map01065;map04742;map01063;map01062;map01061;map01060;map01100;map01120;map05200;map00680;map01064;map00720;map02020;map05230;map01070	Biosynthesis of secondary metabolites;Renal cell carcinoma;Carbon metabolism;Pyruvate metabolism;Citrate cycle (TCA cycle);Glyoxylate and dicarboxylate metabolism;Proximal tubule bicarbonate reclamation;Carbon fixation in photosynthetic organisms;Glucagon signaling pathway;Biosynthesis of alkaloids derived from terpenoid and polyketide;Biosynthesis of alkaloids derived from histidine and purine;T…	Metabolism;Human Diseases;Metabolism;Metabolism;Metabolism;Metabolism;Organismal Systems;Metabolism;Organismal Systems;Metabolism;Metabolism;Organismal Systems;Metabolism;Metabolism;Metabolism;Metabolism;Metabolism;Metabolism;Human Diseases;Metabolism;Metabolism;Metabolism;Environmental Information Processing;Human Diseases;Metabolism	Global and overview maps;Cancer: specific types;Global and overview maps;Carbohydrate metabolism;Carbohydrate metabolism;Carbohydrate metabolism;Excretory system;Energy metabolism;Endocrine system;Chemical structure transformation maps;Chemical structure transformation maps;Sensory system;Chemical structure transformation maps;Chemical structure transformation maps;Chemical structure transformati…	PW_C000592;HMDB0000156;MJDBOTE0000694	Organic acids and derivatives	Hydroxy acids and derivatives	Beta hydroxy acids and derivatives	97-67-6;617-48-1;6915-15-7	133.013	1.11043	M-H	C4H6O5	97.4	0	neg
neg_6822	Psilocin	metab_14200	9.77e-05	0.0002275	1.098	1.1013	1.3233	0.4041	yes	C08312	-	-	map01110;map01063;map00901	Biosynthesis of secondary metabolites;Biosynthesis of alkaloids derived from shikimate pathway;Indole alkaloid biosynthesis	Metabolism;Metabolism;Metabolism	Global and overview maps;Chemical structure transformation maps;Biosynthesis of other secondary metabolites	HMDB0042000	Organoheterocyclic compounds	Indoles and derivatives	Tryptamines and derivatives	520-53-6	249.124	3.43075	M+FA-H	C12H16N2O	0	49	neg
pos_2193	Fenvalerate	metab_1319	0.004408	0.006338	1.0978	1.1116	1.2788	0.3548	yes	C10988	-	-	-	-	-	-	HMDB0031791	Lipids and lipid-like molecules	Fatty Acyls	Fatty acid esters	51630-58-1	384.115	2.9455	M+H-2H2O	C25H22ClNO3	0	57.2	pos
pos_412	Deoxyadenosine	metab_7710	5.33e-05	0.0001257	1.0976	1.1047	0.8129	-0.2988	yes	C00559	Nucleic acids	Nucleosides	map01100;map02010;map00230	Metabolic pathways;ABC transporters;Purine metabolism	Metabolism;Environmental Information Processing;Metabolism	Global and overview maps;Membrane transport;Nucleotide metabolism	HMDB0000101;PW_C000068;HMDB0000050;MJDBOTE0000701	Nucleosides, nucleotides, and analogues	Purine nucleosides	Purine 2''-deoxyribonucleosides	58-61-7;958-09-8	252.109	2.65198	M+H-2H2O, M+H	C10H13N5O3	74.8	0	pos
neg_1364	Geneticin	metab_8161	5.95e-05	0.0001514	1.0975	1.0883	1.2966	0.3748	yes	C17703	-	-	map01110;map00524	Biosynthesis of secondary metabolites;Neomycin, kanamycin and gentamicin biosynthesis	Metabolism;Metabolism	Global and overview maps;Biosynthesis of other secondary metabolites	HMDB0242565	Organic oxygen compounds	Organooxygen compounds	Carbohydrates and carbohydrate conjugates	49863-47-0	533.221	3.27288	M+K-2H	C20H40N4O10	0	45.7	neg
pos_3583	Coprocholic acid	metab_2847	0.0009414	0.001592	1.0964	1.1205	0.771	-0.3752	yes	-	-	-	-	-	-	-	HMDB0000601	Lipids and lipid-like molecules	Steroids and steroid derivatives	Bile acids, alcohols and derivatives	547-98-8	468.368	6.58388	M+NH4	C27H46O5	0	45.6	pos
pos_4859	N-Eicosapentaenoyl Arginine	metab_4249	0.0001422	0.0002997	1.0961	1.0911	1.2651	0.3392	yes	-	-	-	-	-	-	-	HMDB0242065	Not Available	Not Available	Not Available	-	500.358	6.17883	M+ACN+H	C26H42N4O3	0	36.8	pos
neg_2742	Valtrate	metab_9686	0.001053	0.001754	1.096	1.1128	0.7127	-0.4887	yes	C09801	-	-	-	-	-	-	HMDB0034493	Lipids and lipid-like molecules	Prenol lipids	Monoterpenoids	18296-44-1	233.043	5.32122	M+Na-2H	C10H12O5	0	64	neg
pos_4541	Tridec-10-enedioylcarnitine	metab_3902	8e-06	2.49e-05	1.0955	1.0836	0.8137	-0.2974	yes	-	-	-	-	-	-	-	HMDB0241320	Lipids and lipid-like molecules	Fatty Acyls	Fatty acid esters	-	403.284	6.56792	M+NH4	C20H35NO6	0	54.4	pos
pos_6613	Gentamicin A sulfate	metab_6186	0.02025	0.02569	1.0948	1.1091	0.6639	-0.5911	yes	-	-	-	-	-	-	-	HMDB0252686	Organic oxygen compounds	Organooxygen compounds	Carbohydrates and carbohydrate conjugates	-	491.234	3.26522	M+Na	C18H36N4O10	0	86.1	pos
pos_341	Glycyl-Lysine	metab_2660	0.001082	0.001804	1.0946	1.0996	1.2312	0.3	yes	-	-	-	-	-	-	-	HMDB0028846	Organic acids and derivatives	Carboxylic acids and derivatives	Amino acids, peptides, and analogues	-	204.134	0.75615	M+H, M+Na	C8H17N3O3	0	36.7	pos
neg_2205	Tetrahydrofurfuryl acetate	metab_9094	0.0005357	0.0009553	1.0944	1.0793	0.7038	-0.5068	yes	-	-	-	-	-	-	-	HMDB0031176	Organoheterocyclic compounds	Tetrahydrofurans	Not Available	637-64-9	189.076	4.38305	M+FA-H	C7H12O3	0	33.5	neg
pos_5459	Indole-3-Carboxaldehyde	metab_7728	0.0003729	0.0007001	1.0941	1.0792	0.8152	-0.2947	yes	C08493	-	-	-	-	-	-	HMDB0029737;HMDB0000197;HMDB0000195;MJDBSJD0000088	Organoheterocyclic compounds	Indoles and derivatives	Indoles	87-51-4;487-89-8;58-63-9	146.06	5.32977	M+H	C9H7NO	97	0	pos
pos_1604	Nebularine	metab_672	0.0004886	0.0008926	1.0933	1.0818	1.237	0.3068	yes	C01736	-	-	-	-	-	-	HMDB0029956	Nucleosides, nucleotides, and analogues	Purine nucleosides	Not Available	550-33-4	270.119	0.898817	M+NH4, 2M+ACN+Na	C10H12N4O4	0	43.2	pos
neg_4578	6-Deoxocastasterone	metab_11716	0.006294	0.008756	1.0931	1.1133	0.7557	-0.4041	yes	C15802	-	-	map01100;map00905;map01110	Metabolic pathways;Brassinosteroid biosynthesis;Biosynthesis of secondary metabolites	Metabolism;Metabolism;Metabolism	Global and overview maps;Metabolism of terpenoids and polyketides;Global and overview maps	HMDB0033984;LMST01030127	Lipids and lipid-like molecules	Steroids and steroid derivatives	Bile acids, alcohols and derivatives	87833-54-3	495.369	6.25042	M+FA-H	C28H50O4	0	45.3	neg
neg_6780	Salutaridinol	metab_14153	1.57e-05	5.13e-05	1.0931	1.0845	1.2729	0.3481	yes	C05220	-	-	map00950;map01100;map01110;map01063	Isoquinoline alkaloid biosynthesis;Metabolic pathways;Biosynthesis of secondary metabolites;Biosynthesis of alkaloids derived from shikimate pathway	Metabolism;Metabolism;Metabolism;Metabolism	Biosynthesis of other secondary metabolites;Global and overview maps;Global and overview maps;Chemical structure transformation maps	HMDB0304480	Benzenoids	Phenanthrenes and derivatives	Not Available	3271-79-2	350.136	3.46995	M+Na-2H	C19H23NO4	0	49	neg
pos_4920	Val Thr Pro Gly Gly	metab_4318	0.001702	0.002697	1.0929	1.0711	0.7906	-0.339	yes	-	-	-	-	-	-	-	-	-	-	-	-	430.226	6.1152	M+H	C18H31N5O7	65.3	0	pos
neg_5313	Glu-Ile-Leu-Asp-Val	metab_12531	4.18e-09	8.11e-08	1.0925	1.0896	1.2655	0.3397	yes	-	-	-	-	-	-	-	HMDB0252757	Organic acids and derivatives	Peptidomimetics	Hybrid peptides	-	586.309	5.33688	M-H	C26H45N5O10	0	75.5	neg
neg_458	Phorbolol myristate acetate	metab_11718	0.0002064	0.0004247	1.0918	1.0948	0.8092	-0.3054	yes	-	-	-	-	-	-	-	HMDB0256460	Lipids and lipid-like molecules	Prenol lipids	Diterpenoids	-	663.412	6.55457	M-H, M+FA-H	C36H58O8	0	61.1	neg
neg_4806	11-Oxo-androsterone glucuronide	metab_11969	1.89e-07	1.65e-06	1.0917	1.0908	1.2874	0.3645	yes	-	-	-	-	-	-	-	LMST05010032;HMDB0010338	Lipids and lipid-like molecules	Glycerolipids	Diradylglycerols	-	479.228	5.95487	M-H	C25H36O9	0	46.1	neg
pos_3102	Silux	metab_2323	1.69e-05	4.69e-05	1.0916	1.0947	1.282	0.3584	yes	C14511	-	-	-	-	-	-	HMDB0249239	Benzenoids	Benzene and substituted derivatives	Diphenylmethanes	-	530.279	5.28977	M+NH4	C29H36O8	0	42.7	pos
pos_2134	Neamine	metab_1255	0.001251	0.002045	1.0906	1.0821	1.2462	0.3175	yes	C01441	-	-	map01110;map00524	Biosynthesis of secondary metabolites;Neomycin, kanamycin and gentamicin biosynthesis	Metabolism;Metabolism	Global and overview maps;Biosynthesis of other secondary metabolites	HMDB0255495	Organic oxygen compounds	Organooxygen compounds	Carbohydrates and carbohydrate conjugates	3947-65-7	386.203	2.81167	M+ACN+Na	C12H26N4O6	0	65.5	pos
neg_4761	Capsianoside I	metab_11919	0.0001813	0.0003795	1.0904	1.0949	0.778	-0.3621	yes	-	-	-	-	-	-	-	HMDB0002318	Lipids and lipid-like molecules	Fatty Acyls	Fatty acyl glycosides	121924-04-7	641.319	5.994	M-H2O-H	C32H52O14	0	45.8	neg
neg_4309	N-Oleoyl-L-Serine	metab_11418	4.61e-07	3.24e-06	1.0904	1.0914	1.264	0.338	yes	-	-	-	-	-	-	-	HMDB0242185	Organic acids and derivatives	Carboxylic acids and derivatives	Amino acids, peptides, and analogues	-	368.28	6.61715	M-H	C21H39NO4	88	0	neg
pos_1277	Bisnorcholic acid	metab_308	7.76e-08	5.86e-07	1.0899	1.0851	0.8319	-0.2655	yes	-	-	-	-	-	-	-	HMDB0002082;LMST04050005	Lipids and lipid-like molecules	Steroids and steroid derivatives	Bile acids, alcohols and derivatives	-	403.247	6.1152	M+H, M+Na	C22H36O5	0	57.3	pos
neg_1061	Valylhistidine	metab_7826	0.001445	0.002321	1.089	1.0913	1.276	0.3517	yes	-	-	-	-	-	-	-	HMDB0029129	Organic acids and derivatives	Carboxylic acids and derivatives	Amino acids, peptides, and analogues	13589-07-6	253.13	0.969533	M-H	C11H18N4O3	0	31.2	neg
pos_713	Etilefrine	metab_6757	0.0001639	0.0003386	1.0888	1.0967	0.7918	-0.3367	yes	-	-	-	-	-	-	-	HMDB0252100	Benzenoids	Phenols	1-hydroxy-4-unsubstituted benzenoids	-	214.144	4.74435	M+Na, M+CH3OH+H	C10H15NO2	0	38.2	pos
pos_7226	G-Nitro-l-arginine methyl ester	metab_6860	0.003411	0.005033	1.0883	1.0714	1.2847	0.3614	yes	-	-	-	-	-	-	-	HMDB0252563	Organic acids and derivatives	Carboxylic acids and derivatives	Amino acids, peptides, and analogues	-	198.097	2.20715	M+H-2H2O	C7H15N5O4	0	32.6	pos
neg_2984	Lomustine	metab_9952	1.32e-05	4.5e-05	1.0881	1.0847	0.7234	-0.4671	yes	C07079	-	-	-	-	-	-	HMDB0015337	Organic acids and derivatives	Organic carbonic acids and derivatives	Ureas	13010-47-4	268.065	5.79305	M+Cl	C9H16ClN3O2	0	31.1	neg
neg_3493	Peiminine	metab_10515	5.73e-05	0.0001464	1.0864	1.0953	1.2406	0.311	yes	C10808	-	-	-	-	-	-	HMDB0256206	Lipids and lipid-like molecules	Steroids and steroid derivatives	Steroidal alkaloids	61825-98-7	450.301	6.60933	M+Na-2H	C27H43NO3	0	44.3	neg
neg_7153	Gamma-Glutamyllysine	metab_14567	0.0003597	0.0006741	1.0861	1.088	1.2214	0.2885	yes	-	-	-	-	-	-	-	HMDB0029154	Organic acids and derivatives	Carboxylic acids and derivatives	Amino acids, peptides, and analogues	5978-23-4	274.141	2.78715	M-H	C11H21N3O5	0	43	neg
neg_1366	Miglitol	metab_8163	3.62e-05	0.0001015	1.0861	1.0937	0.7918	-0.3368	yes	C07708	-	-	-	-	-	-	HMDB0014634;MJDBOTE0000907	Organoheterocyclic compounds	Piperidines	Not Available	72432-03-2	188.092	3.2807	M-H2O-H	C8H17NO5	0	40	neg
pos_5813	DG(15:0/0:0/TXB2)	metab_5299	2.03e-07	1.21e-06	1.0857	1.0786	0.7942	-0.3325	yes	-	-	-	-	-	-	-	HMDB0295269	Not Available	Not Available	Not Available	-	357.235	4.59172	M+2Na	C38H68O9	0	44.5	pos
pos_6188	Ile-Ile-Ile-Pro	metab_5715	0.0005758	0.00103	1.0857	1.0765	1.2163	0.2826	yes	-	-	-	-	-	-	-	HMDB0304800	Organic acids and derivatives	Carboxylic acids and derivatives	Amino acids, peptides, and analogues	-	493.281	3.91463	M+K	C23H42N4O5	0	45.5	pos
pos_7330	3-Hydroxy-L-proline	metab_6975	0.00168	0.002666	1.0855	1.0913	1.2371	0.307	yes	C04397	-	-	-	-	-	-	HMDB0002113	Organic acids and derivatives	Carboxylic acids and derivatives	Amino acids, peptides, and analogues	4298-08-02	304.15	1.62155	2M+ACN+H	C5H9NO3	0	58.8	pos
neg_2089	Guanidoacetic acid	metab_8964	6.5e-05	0.0001626	1.0855	1.0861	0.7763	-0.3654	yes	C00581	-	-	map01100;map00330;map00260	Metabolic pathways;Arginine and proline metabolism;Glycine, serine and threonine metabolism	Metabolism;Metabolism;Metabolism	Global and overview maps;Amino acid metabolism;Amino acid metabolism	HMDB0000128;PW_C000083	Organic acids and derivatives	Carboxylic acids and derivatives	Amino acids, peptides, and analogues	352-97-6	233.103	4.17865	2M-H	C3H7N3O2	0	31	neg
[truncated: 228 more rows]
