# Supplementary material for: The microbiome- and metabolome-modulating activity of dietary cholesterol: insights from the small and large intestines
Source: Royal Society of Chemistry journal article supplement (doi:10.1039/d4fo03049d), 2025-01-01
Supplement: d4fo03049d9.xlsx [file d4fo03049d9.xlsx]

## Sheet: Supplementary Table S9
Table S9. Metabolites Significantly Altered in iSI_02 and iLI_02 Groups Based on Metabolomics
ID	Metabolite	Metab ID	P_value	FDR	VIP_pred_OPLS-DA	VIP_PLS-DA	FC(iLI_02/iSI_02)	Log2FC(iLI_02/iSI_02)	Significant	KEGG Compound ID	KEGG Compound First Category	KEGG Compound Second Category	KEGG Pathway ID	KEGG Pathway Description	KEGG Pathway First Category	KEGG Pathway Second Category	Library ID	HMDB Superclass	HMDB Class	HMDB Subclass	CAS ID	M/Z	Retention time	Adducts	Formula	Fragmentation Score	Theoretical Fragmentation Score	Mode
pos_1124	28-Homobrassinolide	metab_140	1.47e-09	2.73e-08	2.6105	2.6128	15.1122	3.9176	yes	-	-	-	-	-	-	-	HMDB0030423	Lipids and lipid-like molecules	Steroids and steroid derivatives	Steroid lactones	80483-89-2	477.357	6.59177	M+H-H2O, M+H	C29H50O6	0	33.9	pos
pos_3150	Arabinofuranosylcytosine	metab_2376	1.75e-17	1.04e-13	2.4746	2.4751	0.0051	-7.6084	yes	C02961	-	-	-	-	-	-	HMDB0015122;HMDB0248553	Nucleosides, nucleotides, and analogues	Pyrimidine nucleosides	Not Available	147-94-4	504.207	5.42647	2M+NH4	C9H13N3O5	0	40.4	pos
pos_24	1-Nitro-5-hydroxy-6-glutathionyl-5,6-dihydronaphthalene	metab_1546	1.77e-14	2.19e-11	2.4386	2.4402	0.2323	-2.1058	yes	C14805	-	-	map00980	Metabolism of xenobiotics by cytochrome P450	Metabolism	Xenobiotics biodegradation and metabolism	HMDB0060327	Organic acids and derivatives	Carboxylic acids and derivatives	Amino acids, peptides, and analogues	-	497.134	4.20532	M+H, M+K, M+NH4, M+Na	C20H24N4O9S	0	64.2	pos
pos_2738	Sulbactam	metab_1919	2.22e-14	2.19e-11	2.315	2.3164	0.1316	-2.926	yes	C07770	-	-	-	-	-	-	HMDB0258566	Organic acids and derivatives	Carboxylic acids and derivatives	Amino acids, peptides, and analogues	68373-14-8	275.069	4.20532	M+ACN+H	C8H11NO5S	0	50.5	pos
neg_4158	DG(15:0/18:3(9Z,12Z,15Z)/0:0)	metab_11251	9.9e-07	4.69e-06	2.3101	2.3066	15.0515	3.9118	yes	C00165	-	-	map05214;map05167;map04650;map05163;map04750;map05235;map04015;map04014;map04659;map04540;map04010;map04012;map05022;map04370;map04371;map04072;map04071;map04975;map05143;map05012;map05231;map05146;map04919;map05200;map04961;map04745;map04921;map04920;map04923;map04925;map05017;map04625;map04929;map04726;map04725;map04724;map04723;map04722;map05223;map04720;map04666;map05170;map04664;map04658;map…	Glioma;Kaposi sarcoma-associated herpesvirus infection;Natural killer cell mediated cytotoxicity;Human cytomegalovirus infection;Inflammatory mediator regulation of TRP channels;PD-L1 expression and PD-1 checkpoint pathway in cancer;Rap1 signaling pathway;Ras signaling pathway;Th17 cell differentiation;Gap junction;MAPK signaling pathway;ErbB signaling pathway;Pathways of neurodegeneration - mult…	Human Diseases;Human Diseases;Organismal Systems;Human Diseases;Organismal Systems;Human Diseases;Environmental Information Processing;Environmental Information Processing;Organismal Systems;Cellular Processes;Environmental Information Processing;Environmental Information Processing;Human Diseases;Environmental Information Processing;Environmental Information Processing;Environmental Information …	Cancer: specific types;Infectious disease: viral;Immune system;Infectious disease: viral;Sensory system;Cancer: overview;Signal transduction;Signal transduction;Immune system;Cellular community - eukaryotes;Signal transduction;Signal transduction;Neurodegenerative disease;Signal transduction;Signal transduction;Signal transduction;Signal transduction;Digestive system;Infectious disease: parasitic…	HMDB0007076;PW_C003127	Lipids and lipid-like molecules	Fatty Acyls	Lineolic acids and derivatives	-	557.457	7.02312	M-H2O-H	C36H64O5	0	49.6	neg
neg_4706	Epothilone A	metab_11858	5.72e-11	5.61e-09	2.302	2.3021	0.1742	-2.5213	yes	C12153	-	-	map01052	Type I polyketide structures	Metabolism	Metabolism of terpenoids and polyketides	HMDB0251873;LMPK04000040	Phenylpropanoids and polyketides	Macrolides and analogues	Epothilones and analogues	152044-53-6	492.243	6.04828	M-H	C26H39NO6S	0	52.7	neg
neg_2262	Erinacine P	metab_9156	1.05e-18	6.1e-15	2.2981	2.2976	0.0056	-7.4857	yes	-	-	-	-	-	-	-	HMDB0036313	Lipids and lipid-like molecules	Prenol lipids	Diterpenoids	291532-17-7	491.267	4.46347	M-H	C27H40O8	0	60.2	neg
pos_6728	Serylproline	metab_6311	1.72e-06	5.96e-06	2.2497	2.2637	0.0753	-3.7317	yes	-	-	-	-	-	-	-	HMDB0029047	Organic acids and derivatives	Carboxylic acids and derivatives	Amino acids, peptides, and analogues	23827-93-2	405.198	3.1052	2M+H	C8H14N2O4	0	35.8	pos
pos_1408	Val Leu Leu Gly Thr	metab_454	7.24e-14	4.77e-11	2.2444	2.2457	0.212	-2.2378	yes	-	-	-	-	-	-	-	-	-	-	-	-	502.323	4.81707	M+H, M+Na	C23H43N5O7	37.8	0	pos
pos_2405	Hydroxyprolylhydroxyproline	metab_1553	1.48e-14	2.19e-11	2.2334	2.2344	0.1088	-3.2004	yes	-	-	-	-	-	-	-	HMDB0028864	Organic acids and derivatives	Carboxylic acids and derivatives	Amino acids, peptides, and analogues	21768-17-2	245.113	3.40008	M+H	C10H16N2O5	0	33.8	pos
pos_4545	LysoPA(22:5(7Z,10Z,13Z,16Z,19Z)/0:0)	metab_3906	3.54e-12	5.57e-10	2.2326	2.2332	0.3035	-1.7205	yes	-	-	-	-	-	-	-	HMDB0114754	Lipids and lipid-like molecules	Glycerophospholipids	Glycerophosphates	-	526.293	6.55998	M+ACN+H	C25H41O7P	0	70.4	pos
pos_3731	LysoPS(18:0/0:0)	metab_3009	1.67e-13	8.98e-11	2.2245	2.2257	0.2568	-1.9613	yes	-	-	-	-	-	-	-	HMDB0240606	Lipids and lipid-like molecules	Glycerophospholipids	Glycerophosphoserines	119786-67-3	526.314	7.11597	M+H	C24H48NO9P	0	75.6	pos
neg_4855	Glycyl-prolyl-arginyl-valyl-valyl-glutamic acid	metab_12023	0.0008149	0.00138	2.2231	2.2016	0.282	-1.8264	yes	-	-	-	-	-	-	-	HMDB0252831	Organic acids and derivatives	Carboxylic acids and derivatives	Amino acids, peptides, and analogues	-	676.338	5.93142	M+Na-2H	C28H49N9O9	0	63	neg
neg_5888	Sufentanil	metab_13167	3.15e-13	6.08e-10	2.2048	2.2054	0.0467	-4.4216	yes	C08022	-	-	-	-	-	-	HMDB0014846;PW_C009183	Benzenoids	Benzene and substituted derivatives	Anilides	56030-54-7	421.173	4.47915	M+Cl	C22H30N2O2S	0	38	neg
pos_5863	L-Pyroglutamyl-L-histidyl-3,3-dimethylprolinamide	metab_5354	6.78e-05	0.0001464	2.1626	2.1614	8.4135	3.0727	yes	-	-	-	-	-	-	-	HMDB0257369	Organic acids and derivatives	Carboxylic acids and derivatives	Amino acids, peptides, and analogues	-	355.186	4.49522	M+H-2H2O	C18H26N6O4	0	34.2	pos
neg_6315	Ancymidol	metab_13639	4.77e-11	5.11e-09	2.1555	2.1554	48.3573	5.5957	yes	C18774	-	-	-	-	-	-	HMDB0248390	Benzenoids	Phenol ethers	Anisoles	12771-68-5	301.12	3.95018	M+FA-H	C15H16N2O2	0	59.4	neg
pos_6030	Merafloxacin	metab_5541	1.54e-10	6.77e-09	2.1219	2.1214	0.1466	-2.7699	yes	-	-	-	-	-	-	-	HMDB0254459	Organoheterocyclic compounds	Quinolines and derivatives	Quinoline carboxylic acids	-	397.208	4.18067	M+NH4	C19H23F2N3O3	0	42.7	pos
pos_4409	Dihydrotachysterol	metab_3755	9.21e-07	3.5e-06	2.1072	2.1053	2.5378	1.3436	yes	C06957	-	-	-	-	-	-	HMDB0015203	Lipids and lipid-like molecules	Steroids and steroid derivatives	Vitamin D and derivatives	67-96-9	462.368	6.79055	M+ACN+Na	C28H46O	0	53.2	pos
pos_3281	2-(beta-D-Mannopyranosyl)-L-tryptophan	metab_2518	3.37e-10	1.07e-08	2.1044	2.1044	5.0763	2.3438	yes	-	-	-	-	-	-	-	HMDB0258059	Organoheterocyclic compounds	Pyridines and derivatives	Phenylpyridines	-	349.139	5.84395	M+H-H2O	C17H22N2O7	0	80.3	pos
neg_4308	N-Arachidonoyl Proline	metab_11417	1.04e-11	1.94e-09	2.1014	2.1032	0.3048	-1.714	yes	-	-	-	-	-	-	-	HMDB0242002	Not Available	Not Available	Not Available	-	400.286	6.61715	M-H	C25H39NO3	0	40.4	neg
pos_2042	Milbemycin alpha5	metab_1155	1.78e-05	4.52e-05	2.0813	2.0809	0.2877	-1.7975	yes	-	-	-	-	-	-	-	HMDB0254721;HMDB0242623;HMDB0254730;HMDB0254723	Phenylpropanoids and polyketides	Macrolides and analogues	Milbemycins	-	337.203	2.65198	M+2H	C38H56O10	0	44.1	pos
pos_5414	Norchalciporyl propionate	metab_4862	1.49e-05	3.86e-05	2.0734	2.0693	0.3079	-1.6992	yes	-	-	-	-	-	-	-	HMDB0029829	Organoheterocyclic compounds	Azepines	Not Available	112448-75-6	536.344	5.41047	2M+NH4	C16H21NO2	0	39.9	pos
pos_1502	Trp Asp	metab_559	2.88e-05	6.84e-05	2.0704	2.061	0.3336	-1.5838	yes	-	-	-	-	-	-	-	-	-	-	-	-	320.124	3.0331	M+H, M+NH4	C15H17N3O5	91	0	pos
neg_5644	Hydroxyprolyl-Valine	metab_12897	1.3e-05	3.74e-05	2.0621	2.0607	0.2847	-1.8122	yes	-	-	-	-	-	-	-	HMDB0028876	Organic acids and derivatives	Carboxylic acids and derivatives	Amino acids, peptides, and analogues	-	459.246	4.85657	2M-H	C10H18N2O4	0	65.5	neg
neg_5807	4-Hydroxy-3-prenylbenzoic acid glucoside	metab_13078	5.35e-05	0.000124	2.0535	2.0477	6.0707	2.6019	yes	-	-	-	-	-	-	-	HMDB0039891	Organic oxygen compounds	Organooxygen compounds	Carbohydrates and carbohydrate conjugates	-	367.143	4.59687	M-H	C18H24O8	0	34.8	neg
neg_2512	Simmondsin 2'-ferulate	metab_9432	5.99e-12	1.65e-09	2.0428	2.0443	0.1864	-2.4234	yes	-	-	-	-	-	-	-	HMDB0035475	Phenylpropanoids and polyketides	Cinnamic acids and derivatives	Hydroxycinnamic acids and derivatives	179466-18-3	532.186	4.9356	M-H2O-H	C26H33NO12	0	52.3	neg
pos_2029	Phenylalanyllysine	metab_1140	3.84e-05	8.87e-05	2.0389	2.0418	0.2206	-2.1803	yes	-	-	-	-	-	-	-	HMDB0029000	Organic acids and derivatives	Carboxylic acids and derivatives	Amino acids, peptides, and analogues	6456-72-0	294.181	2.61212	M+H	C15H23N3O3	0	70.5	pos
neg_1743	Canrenone	metab_8581	5.93e-05	0.0001355	2.0347	2.0535	0.1962	-2.3493	yes	-	-	-	-	-	-	-	HMDB0003033;HMDB0258427	Lipids and lipid-like molecules	Steroids and steroid derivatives	Steroid lactones	976-71-6	375.171	3.72183	M+Cl	C22H28O3	0	30.8	neg
pos_6912	Proline glutamate	metab_6515	7.59e-05	0.000162	2.0309	2.0251	0.2981	-1.7461	yes	-	-	-	-	-	-	-	HMDB0256798	Organic acids and derivatives	Carboxylic acids and derivatives	Amino acids, peptides, and analogues	-	302.135	2.87382	M+ACN+H	C10H16N2O6	0	51.4	pos
pos_1352	4-Hydroxytetradecanedioylcarnitine	metab_392	3.73e-06	1.17e-05	2.0067	1.9966	3.2381	1.6951	yes	-	-	-	-	-	-	-	HMDB0241424	Lipids and lipid-like molecules	Fatty Acyls	Fatty acid esters	-	418.28	5.99563	M+H-2H2O, M+H	C21H39NO7	0	49.2	pos
pos_705	Pentoprilat	metab_6668	6.12e-05	0.0001334	2.0005	1.9924	4.1672	2.0591	yes	-	-	-	-	-	-	-	HMDB0256291	Organoheterocyclic compounds	Indoles and derivatives	Indolecarboxylic acids and derivatives	-	323.16	4.64772	M+NH4, M+CH3OH+H	C16H19NO5	0	83.9	pos
neg_4345	N-Oleoyl Cysteine	metab_11458	1.96e-11	2.71e-09	1.9945	1.9964	0.2578	-1.9558	yes	-	-	-	-	-	-	-	HMDB0241957	Not Available	Not Available	Not Available	-	384.258	6.56238	M-H	C21H39NO3S	0	36.8	neg
neg_1968	Garcinone D	metab_8830	9.84e-12	1.94e-09	1.9834	1.9849	0.3475	-1.5251	yes	-	-	-	-	-	-	-	HMDB0033332	Organoheterocyclic compounds	Benzopyrans	1-benzopyrans	107390-08-9	463.151	4.02132	M+Cl	C24H28O7	0	38.7	neg
neg_6725	Furanone A	metab_14093	1.55e-12	9.43e-10	1.9829	1.9819	4.0346	2.0124	yes	C17602	-	-	-	-	-	-	HMDB0094691	Organoheterocyclic compounds	Dihydrofurans	Furanones	-	213.04	3.52528	2M+FA-H	C4H4O2	0	37.8	neg
neg_731	Indole-3-acetyl-myo-inositol	metab_14739	7.5e-05	0.0001663	1.9797	1.9726	5.1717	2.3706	yes	C03868	-	-	-	-	-	-	HMDB0031182	Organoheterocyclic compounds	Indoles and derivatives	Indolyl carboxylic acids and derivatives	73925-84-5	336.109	4.35173	M-H, M+Na-2H	C16H19NO7	0	36.7	neg
neg_6470	Cisapride	metab_13811	1.19e-11	2.09e-09	1.9728	1.9737	0.3255	-1.6192	yes	C06910	-	-	-	-	-	-	HMDB0014742	Benzenoids	Benzene and substituted derivatives	Benzoic acids and derivatives	81098-60-4	446.168	3.793	M-H2O-H	C23H29ClFN3O4	0	47.5	neg
neg_5695	N-(3-acetamidopropyl)pyrrolidin-2-one	metab_12953	2.82e-07	1.76e-06	1.9632	1.9643	0.3356	-1.575	yes	-	-	-	-	-	-	-	HMDB0061384	Organoheterocyclic compounds	Pyrrolidines	N-alkylpyrrolidines	106692-36-8	427.256	4.76547	2M+Hac-H	C9H16N2O2	0	63.1	neg
pos_6090	16-Oxoestrone	metab_5607	3.65e-05	8.46e-05	1.9579	1.9497	0.2295	-2.1234	yes	C14441	-	-	-	-	-	-	HMDB0000372;LMST02010048	Lipids and lipid-like molecules	Steroids and steroid derivatives	Estrane steroids	1228-73-5	307.129	4.06797	M+Na	C18H20O3	0	42.1	pos
pos_6839	Trp Gln	metab_6434	6.58e-06	1.9e-05	1.9527	1.9469	0.3831	-1.3841	yes	-	-	-	-	-	-	-	-	-	-	-	-	333.156	2.96135	M+H	C16H20N4O4	76.5	0	pos
pos_7483	4-Trimethylammoniobutanoic Acid	metab_7140	2.44e-09	3.86e-08	1.9505	1.9474	2.0936	1.066	yes	C01181	-	-	map01100;map00310;map02010	Metabolic pathways;Lysine degradation;ABC transporters	Metabolism;Metabolism;Environmental Information Processing	Global and overview maps;Amino acid metabolism;Membrane transport	PW_C000899;HMDB0001161	Lipids and lipid-like molecules	Fatty Acyls	Fatty acids and conjugates	407-64-7	146.118	0.9301	M+H	C7H15NO2	53.4	0	pos
pos_556	7-Hydroxyflumequine	metab_5020	3.05e-07	1.37e-06	1.945	1.9438	3.2993	1.7222	yes	-	-	-	-	-	-	-	HMDB0247260	Organoheterocyclic compounds	Quinolines and derivatives	Quinoline carboxylic acids	-	260.074	3.48008	M+H-H2O, M+ACN+Na	C14H12FNO4	0	54	pos
neg_4834	2-Heptenoic acid	metab_12000	1.35e-06	5.97e-06	1.9441	1.9413	3.1776	1.668	yes	-	-	-	-	-	-	-	LMFA01030012;HMDB0031484	Lipids and lipid-like molecules	Fatty Acyls	Fatty acids and conjugates	18999-28-5	301.166	5.94705	2M+FA-H	C7H12O2	0	31.7	neg
neg_3394	LysoPC(18:3(6Z,9Z,12Z)/0:0)	metab_10406	0.0003853	0.0007057	1.9397	1.9446	0.309	-1.6942	yes	C04230	Lipids	Phospholipids	map00564;map05231	Glycerophospholipid metabolism;Choline metabolism in cancer	Metabolism;Human Diseases	Lipid metabolism;Cancer: overview	HMDB0010387	Lipids and lipid-like molecules	Glycerophospholipids	Glycerophosphocholines	-	562.315	6.42952	M+FA-H	C26H48NO7P	0	64	neg
pos_407	Gln Leu Arg	metab_3381	1.14e-06	4.15e-06	1.9374	1.9382	0.3797	-1.3969	yes	-	-	-	-	-	-	-	-	-	-	-	-	416.262	2.60413	M+2H, M+H	C17H33N7O5	65	0	pos
neg_5434	Traumatin	metab_12665	6.67e-06	2.14e-05	1.9365	1.929	14.1302	3.8207	yes	C16309	-	-	map00592;map01110	alpha-Linolenic acid metabolism;Biosynthesis of secondary metabolites	Metabolism;Metabolism	Lipid metabolism;Global and overview maps	LMFA01060093;HMDB0037326	Lipids and lipid-like molecules	Fatty Acyls	Fatty acids and conjugates	65410-38-0	257.139	5.176	M+FA-H	C12H20O3	0	31.3	neg
pos_3618	17-hydroxyprogesterone caproate	metab_2885	9.46e-05	0.0001968	1.9364	1.9315	0.3886	-1.3637	yes	-	-	-	-	-	-	-	HMDB0244774	Lipids and lipid-like molecules	Steroids and steroid derivatives	Pregnane steroids	-	483.248	6.68705	M+K	C27H40O5	0	31.3	pos
pos_3447	Hexobarbital	metab_7725	8.39e-13	1.91e-10	1.9312	1.9329	0.4521	-1.1452	yes	C11723	-	-	-	-	-	-	HMDB0253154;HMDB0015444	Organic oxygen compounds	Organooxygen compounds	Carbonyl compounds	56-29-1	514.265	6.17085	2M+ACN+H	C12H16N2O3	0	32.5	pos
pos_4540	LysoPE(22:6(4Z,7Z,10Z,13Z,16Z,19Z)/0:0)	metab_3901	2.1e-09	3.48e-08	1.923	1.9218	0.2999	-1.7374	yes	-	-	-	-	-	-	-	HMDB0011526	Lipids and lipid-like molecules	Glycerophospholipids	Glycerophosphoethanolamines	-	548.275	6.56792	M+Na	C27H44NO7P	0	91.2	pos
pos_6764	N6-Methyl-2'-deoxyadenosine	metab_6351	9.63e-05	0.0001999	1.9207	1.916	2.5975	1.3771	yes	C03795	-	-	-	-	-	-	HMDB0255300	Nucleosides, nucleotides, and analogues	Purine nucleosides	Purine 2''-deoxyribonucleosides	2002-35-9	248.114	3.06492	M+H-H2O	C11H15N5O3	0	78.5	pos
neg_3206	Gallopamil	metab_10199	5.58e-09	1.01e-07	1.914	1.9105	0.4627	-1.112	yes	C13764	-	-	-	-	-	-	HMDB0252599	Benzenoids	Benzene and substituted derivatives	Phenylbutylamines	16662-47-8	1013.58	6.0561	2M+FA-H	C28H40N2O5	0	80.5	neg
pos_6933	N-Acetylmuramate	metab_6538	2.32e-07	1.1e-06	1.9101	1.9068	2.3288	1.2196	yes	C02713	Carbohydrates	Monosaccharides	map01100;map00520;map02060	Metabolic pathways;Amino sugar and nucleotide sugar metabolism;Phosphotransferase system (PTS)	Metabolism;Metabolism;Environmental Information Processing	Global and overview maps;Carbohydrate metabolism;Membrane transport	HMDB0060493	Organic oxygen compounds	Organooxygen compounds	Carbohydrates and carbohydrate conjugates	61633-75-8	276.108	2.82723	M+H-H2O	C11H19NO8	75.9	0	pos
neg_2354	(-)-Salsoline	metab_9258	7.85e-07	3.9e-06	1.9048	1.8986	0.2551	-1.9706	yes	C09640	-	-	-	-	-	-	HMDB0003626;HMDB0012469	Organoheterocyclic compounds	Tetrahydroisoquinolines	Not Available	89-31-6;53622-84-7	431.215	4.6258	2M+FA-H	C11H15NO2	0	32.8	neg
pos_2474	Avermectin A1a	metab_1629	0.0001135	0.0002306	1.8992	1.8868	0.3143	-1.67	yes	C11984	-	-	map01052;map01100;map00522;map01110	Type I polyketide structures;Metabolic pathways;Biosynthesis of 12-, 14- and 16-membered macrolides;Biosynthesis of secondary metabolites	Metabolism;Metabolism;Metabolism;Metabolism	Metabolism of terpenoids and polyketides;Global and overview maps;Metabolism of terpenoids and polyketides;Global and overview maps	HMDB0242563;LMPK04000025	Phenylpropanoids and polyketides	Macrolides and analogues	Not Available	65195-51-9	444.259	3.5606	M+2H	C49H74O14	0	56.7	pos
pos_472	Leukotriene E3	metab_4096	0.0004135	0.0007317	1.8915	1.8917	0.4632	-1.1103	yes	-	-	-	-	-	-	-	LMFA03020074;HMDB0002355	Lipids and lipid-like molecules	Fatty Acyls	Eicosanoids	79494-05-6	442.266	2.93752	M+H, M+Na	C23H39NO5S	0	33.1	pos
pos_4069	(2-Hydroxy-3-phosphonooxypropyl) octadec-9-enoate	metab_3380	4.98e-12	6.87e-10	1.8914	1.8924	0.3994	-1.3241	yes	-	-	-	-	-	-	-	HMDB0242470	Lipids and lipid-like molecules	Glycerophospholipids	Glycerophosphates	-	478.293	7.7515	M+ACN+H	C21H41O7P	0	54.3	pos
pos_1429	S-(Formylmethyl)glutathione	metab_477	1.32e-12	2.67e-10	1.8862	1.888	0.4838	-1.0477	yes	C14871	-	-	map00980	Metabolism of xenobiotics by cytochrome P450	Metabolism	Xenobiotics biodegradation and metabolism	HMDB0060507	Organic acids and derivatives	Carboxylic acids and derivatives	Amino acids, peptides, and analogues	-	350.101	4.20532	M+H-H2O, M+H	C12H19N3O7S	0	70	pos
neg_344	1-Nitro-7-glutathionyl-8-hydroxy-7,8-dihydronaphthalene	metab_10457	5.49e-08	5.06e-07	1.8851	1.8872	0.4948	-1.0152	yes	C14804	-	-	map00980	Metabolism of xenobiotics by cytochrome P450	Metabolism	Xenobiotics biodegradation and metabolism	HMDB0060329	Benzenoids	Naphthalenes	Not Available	-	495.119	4.72313	M-H, 2M-H	C20H24N4O9S	0	61.8	neg
pos_5216	Grazoprevir	metab_4643	4.01e-07	1.73e-06	1.881	1.8823	0.5033	-0.9904	yes	-	-	-	-	-	-	-	HMDB0252939	Organic acids and derivatives	Carboxylic acids and derivatives	Amino acids, peptides, and analogues	-	767.35	5.83597	M+H	C38H50N6O9S	0	36.7	pos
neg_3271	Ibutamoren	metab_10270	7.28e-09	1.21e-07	1.8742	1.8746	2.0362	1.0259	yes	-	-	-	-	-	-	-	HMDB0253337	Organic acids and derivatives	Carboxylic acids and derivatives	Amino acids, peptides, and analogues	-	509.219	6.1884	M-H2O-H	C27H36N4O5S	0	30.9	neg
pos_4961	4-(Methylnitrosamino)-1-(3-pyridyl)-1-butanol	metab_4363	4.08e-07	1.76e-06	1.8705	1.8645	2.7637	1.4666	yes	C19574	-	-	map05204;map00980	Chemical carcinogenesis - DNA adducts;Metabolism of xenobiotics by cytochrome P450	Human Diseases;Metabolism	Cancer: overview;Xenobiotics biodegradation and metabolism	HMDB0041809	Organoheterocyclic compounds	Pyridines and derivatives	Not Available	76014-81-8	436.269	6.08332	2M+NH4	C10H15N3O2	0	54.3	pos
neg_1966	Cysteinyl-Tyrosine	metab_8828	2.81e-06	1.07e-05	1.8625	1.8544	2.4187	1.2742	yes	-	-	-	-	-	-	-	HMDB0028787	Organic acids and derivatives	Carboxylic acids and derivatives	Amino acids, peptides, and analogues	-	319.052	4.02132	M+Cl	C12H16N2O4S	0	49.5	neg
neg_6702	Tropolone A	metab_14068	5.59e-11	5.58e-09	1.8545	1.8554	0.4021	-1.3145	yes	-	-	-	-	-	-	-	HMDB0255800	Hydrocarbon derivatives	Tropones	Tropolones	-	466.204	3.54097	M+Cl	C24H33NO6	0	48	neg
neg_1758	3-(3,5-dihydroxyphenyl)-1-propanoic acid sulphate	metab_8597	1.5e-12	9.43e-10	1.8498	1.8499	0.29	-1.7858	yes	-	-	-	-	-	-	-	HMDB0061117	Benzenoids	Phenols	Benzenediols	-	261.007	3.74533	M-H	C9H10O7S	0	37.4	neg
neg_2044	Octopine	metab_8915	7.56e-06	2.38e-05	1.8491	1.8451	3.2819	1.7145	yes	C04137	-	-	map02010;map00330	ABC transporters;Arginine and proline metabolism	Environmental Information Processing;Metabolism	Membrane transport;Amino acid metabolism	HMDB0255912	Organic acids and derivatives	Carboxylic acids and derivatives	Amino acids, peptides, and analogues	34522-32-2	281.101	4.11602	M+Cl	C9H18N4O4	0	35.3	neg
pos_959	(Z)-N-Hexadec-9-Enoyl-L-Phenylalanine	metab_7649	0.001251	0.001983	1.8461	1.8666	0.3431	-1.5432	yes	-	-	-	-	-	-	-	-	-	-	-	-	402.3	6.79845	M+H, M+CH3OH+H	C25H39NO3	68.3	0	pos
neg_1237	Gly-pro-arg-pro	metab_8020	1.22e-10	9.3e-09	1.8426	1.8444	0.5059	-0.983	yes	-	-	-	-	-	-	-	HMDB0252829	Organic acids and derivatives	Carboxylic acids and derivatives	Amino acids, peptides, and analogues	-	460.205	2.64608	M+Cl	C18H31N7O5	0	51.8	neg
neg_3385	Capsicoside A1	metab_10396	9.14e-11	7.67e-09	1.8424	1.8438	0.4876	-1.0363	yes	-	-	-	-	-	-	-	HMDB0303762	Lipids and lipid-like molecules	Steroids and steroid derivatives	Steroidal glycosides	-	575.359	6.41385	M-H2O-H	C33H54O9	0	30.5	neg
pos_2638	Alongside	metab_1809	0.001044	0.001684	1.836	1.8218	3.9814	1.9933	yes	-	-	-	-	-	-	-	HMDB0248179	Phenylpropanoids and polyketides	Macrolides and analogues	Not Available	-	225.112	3.9553	M+H	C12H16O4	0	52.4	pos
neg_4693	Cowagarcinone D	metab_11843	3.44e-08	3.53e-07	1.8355	1.8378	2.2549	1.173	yes	-	-	-	-	-	-	-	HMDB0304628	Organoheterocyclic compounds	Benzopyrans	1-benzopyrans	-	507.203	6.06387	M+FA-H	C28H30O6	0	55.8	neg
pos_1130	Filipin II	metab_147	0.008028	0.01085	1.8334	1.8362	0.3246	-1.6235	yes	-	-	-	-	-	-	-	HMDB0242297;HMDB0252258	Phenylpropanoids and polyketides	Macrolides and analogues	Not Available	-	661.392	6.55998	M+NH4, M+Na	C35H58O10	0	75.8	pos
pos_587	Fumonisin A2	metab_5361	4.75e-06	1.45e-05	1.8301	1.8376	0.4514	-1.1476	yes	-	-	-	-	-	-	-	HMDB0034699	Organic acids and derivatives	Carboxylic acids and derivatives	Fumonisins	117415-47-1	374.707	3.67295	M+2H, M+H	C36H61NO15	0	51.9	pos
pos_4946	Cholylarginine	metab_4346	1.36e-06	4.86e-06	1.8296	1.8244	0.6013	-0.7338	yes	-	-	-	-	-	-	-	HMDB0242375	Lipids and lipid-like molecules	Steroids and steroid derivatives	Bile acids, alcohols and derivatives	-	565.396	6.09132	M+H	C30H52N4O6	0	58.2	pos
neg_5054	Tyr-Gly-Gly-Trp-Leu	metab_12244	3.64e-11	4.3e-09	1.8242	1.8258	0.4203	-1.2506	yes	-	-	-	-	-	-	-	HMDB0259342	Organic acids and derivatives	Carboxylic acids and derivatives	Amino acids, peptides, and analogues	-	615.257	5.73968	M+Na-2H	C30H38N6O7	0	75.7	neg
neg_7146	5-Amino-6-ribitylamino uracil	metab_14559	2.94e-06	1.11e-05	1.8233	1.8316	0.4861	-1.0408	yes	C04732	-	-	map01100;map01110;map01120;map01240;map00680;map00740	Metabolic pathways;Biosynthesis of secondary metabolites;Microbial metabolism in diverse environments;Biosynthesis of cofactors;Methane metabolism;Riboflavin metabolism	Metabolism;Metabolism;Metabolism;Metabolism;Metabolism;Metabolism	Global and overview maps;Global and overview maps;Global and overview maps;Global and overview maps;Energy metabolism;Metabolism of cofactors and vitamins	HMDB0011106	Organic oxygen compounds	Organooxygen compounds	Carbohydrates and carbohydrate conjugates	17014-74-3	313.053	2.89692	M+K-2H	C9H16N4O6	0	55.2	neg
neg_6754	Acotiamide	metab_14125	2.23e-06	8.82e-06	1.822	1.8236	0.3923	-1.3498	yes	C14127	-	-	-	-	-	-	HMDB0247965	Benzenoids	Benzene and substituted derivatives	Phenoxyacetic acid derivatives	185106-16-5	431.178	3.49345	M-H2O-H	C21H30N4O5S	0	38.4	neg
neg_2429	N4-Acetylaminobutanal	metab_9339	5.04e-06	1.71e-05	1.8196	1.8276	0.3325	-1.5886	yes	C05936	-	-	map01100;map00330	Metabolic pathways;Arginine and proline metabolism	Metabolism;Metabolism	Global and overview maps;Amino acid metabolism	HMDB0004226	Organic oxygen compounds	Organooxygen compounds	Carbonyl compounds	-	303.156	4.78017	2M+FA-H	C6H11NO2	0	33.1	neg
pos_6663	Morroniside	metab_6240	5.83e-06	1.71e-05	1.8166	1.8293	0.4301	-1.2172	yes	C17000	-	-	-	-	-	-	HMDB0254897	Organic oxygen compounds	Organooxygen compounds	Carbohydrates and carbohydrate conjugates	25406-64-8	448.183	3.19342	M+ACN+H	C17H26O11	0	51.1	pos
neg_4707	Vorapaxar	metab_11859	2.27e-10	1.45e-08	1.8158	1.8152	2.2393	1.163	yes	-	-	-	-	-	-	-	HMDB0259873	Organoheterocyclic compounds	Naphthofurans	Not Available	-	473.221	6.04828	M-H2O-H	C29H33FN2O4	0	46.2	neg
neg_5159	4-Hydroxypropofol	metab_12360	0.0007131	0.001222	1.8139	1.8134	7.1591	2.8398	yes	-	-	-	-	-	-	-	HMDB0014018	Benzenoids	Benzene and substituted derivatives	Cumenes	-	239.129	5.58533	M+FA-H	C12H18O2	0	54.8	neg
pos_7074	L-Metanephrine	metab_6695	0.001711	0.002642	1.8096	1.8132	0.3969	-1.3332	yes	C05588	-	-	map01100;map00350	Metabolic pathways;Tyrosine metabolism	Metabolism;Metabolism	Global and overview maps;Amino acid metabolism	HMDB0062493	Benzenoids	Phenols	Methoxyphenols	-	417.198	2.73213	2M+Na	C10H15NO3	0	44.4	pos
pos_7223	His Arg	metab_6858	1.29e-10	6.14e-09	1.8093	1.8109	0.4763	-1.0702	yes	-	-	-	-	-	-	-	-	-	-	-	-	312.177	2.24633	M+H	C12H21N7O3	82.6	0	pos
neg_2614	Cyclocreatine	metab_9545	0.001227	0.001986	1.8073	1.8082	4.0264	2.0095	yes	-	-	-	-	-	-	-	HMDB0250642	Organic acids and derivatives	Carboxylic acids and derivatives	Amino acids, peptides, and analogues	-	285.133	5.12498	2M-H	C5H9N3O2	0	31.7	neg
pos_5297	17-O-acetylnorajmaline	metab_4731	6.93e-06	1.98e-05	1.8042	1.8055	2.2275	1.1554	yes	C11809	-	-	map01110;map00901	Biosynthesis of secondary metabolites;Indole alkaloid biosynthesis	Metabolism;Metabolism	Global and overview maps;Biosynthesis of other secondary metabolites	HMDB0304031	Alkaloids and derivatives	Ajmaline-sarpagine alkaloids	Not Available	-	418.212	5.68348	M+ACN+Na	C21H26N2O3	0	70.2	pos
neg_4856	Lithocholic acid glucuronide	metab_12024	1.76e-06	7.31e-06	1.7999	1.7993	2.5104	1.3279	yes	C03033	-	-	map01100;map00040;map04976;map00053;map01240	Metabolic pathways;Pentose and glucuronate interconversions;Bile secretion;Ascorbate and aldarate metabolism;Biosynthesis of cofactors	Metabolism;Metabolism;Organismal Systems;Metabolism;Metabolism	Global and overview maps;Carbohydrate metabolism;Digestive system;Carbohydrate metabolism;Global and overview maps	HMDB0254126;HMDB0002513	Lipids and lipid-like molecules	Steroids and steroid derivatives	Steroidal glycosides	75239-91-7	533.312	5.93142	M-H2O-H	C30H48O9	0	40.3	neg
pos_6401	13-HODE	metab_5953	0.0004453	0.0007798	1.798	1.7883	4.5657	2.1908	yes	C14762	-	-	map00591;map03320	Linoleic acid metabolism;PPAR signaling pathway	Metabolism;Organismal Systems	Lipid metabolism;Endocrine system	LMFA02000228;HMDB0004667;HMDB0242324	Lipids and lipid-like molecules	Fatty Acyls	Lineolic acids and derivatives	29623-28-7	319.223	3.5846	M+Na	C18H32O3	0	44.8	pos
pos_6154	Calpeptin	metab_5678	7.92e-07	3.07e-06	1.7977	1.8004	0.4198	-1.2521	yes	C11256	-	-	-	-	-	-	HMDB0249563	Organic acids and derivatives	Carboxylic acids and derivatives	Amino acids, peptides, and analogues	117591-20-5	407.193	3.97132	M+2Na-H	C20H30N2O4	0	32.3	pos
pos_1428	Precarthamin	metab_476	2.85e-12	4.97e-10	1.7956	1.7975	0.5312	-0.9128	yes	-	-	-	-	-	-	-	HMDB0031967	Phenylpropanoids and polyketides	Flavonoids	Flavonoid glycosides	102716-32-5	453.144	4.20532	M+H, M+Na	C21H24O11	0	30.2	pos
neg_4239	Epothilone B	metab_11341	2.17e-10	1.44e-08	1.7916	1.794	0.4053	-1.3031	yes	C12154	-	-	-	-	-	-	LMPK04000041;HMDB0251874	Phenylpropanoids and polyketides	Macrolides and analogues	Epothilones and analogues	152044-54-7	528.242	6.73443	M+Na-2H	C27H41NO6S	0	45.7	neg
neg_5650	1-Hydroxy-2,2,5,5-tetramethyl-2,5-dihydro-1h-pyrrole-3-carboxamide	metab_12904	6.43e-11	5.91e-09	1.7915	1.7927	0.4367	-1.1952	yes	-	-	-	-	-	-	-	HMDB0243893	Organoheterocyclic compounds	Pyrrolines	Pyrroline carboxylic acids and derivatives	-	413.24	4.84137	2M+FA-H	C9H16N2O2	0	33.9	neg
pos_6507	PC(6 keto-PGF1alpha/18:2(9Z,12Z))	metab_6070	4.72e-12	6.83e-10	1.7887	1.7902	0.483	-1.0498	yes	-	-	-	-	-	-	-	HMDB0286548	Not Available	Not Available	Not Available	-	447.774	3.42407	M+H+Na	C46H82NO12P	0	47.5	pos
neg_1736	Leukotriene D4	metab_8573	6.56e-11	5.93e-09	1.7872	1.7884	0.4349	-1.2012	yes	C05951	Lipids	Eicosanoids	map00590;map01100;map04080;map04664;map05310	Arachidonic acid metabolism;Metabolic pathways;Neuroactive ligand-receptor interaction;Fc epsilon RI signaling pathway;Asthma	Metabolism;Metabolism;Environmental Information Processing;Organismal Systems;Human Diseases	Lipid metabolism;Global and overview maps;Signaling molecules and interaction;Immune system;Immune disease	HMDB0244369;PW_C001775;HMDB0003080;LMFA03020006	Lipids and lipid-like molecules	Fatty Acyls	Eicosanoids	73836-78-9	495.257	3.70615	M-H	C25H40N2O6S	0	34.5	neg
neg_2788	P-Hydroxyubenimex	metab_9736	2.59e-10	1.56e-08	1.7766	1.7783	2.4869	1.3144	yes	-	-	-	-	-	-	-	HMDB0255924	Organic acids and derivatives	Peptidomimetics	Hybrid peptides	-	305.151	5.39572	M-H2O-H	C16H24N2O5	0	42.3	neg
neg_1620	Benazepril	metab_8445	4.75e-06	1.62e-05	1.7765	1.7857	0.3999	-1.3222	yes	C06843	-	-	-	-	-	-	PW_C009037;HMDB0014682;MJDBOTE0001359	Organic acids and derivatives	Carboxylic acids and derivatives	Amino acids, peptides, and analogues	86541-75-5	459.173	3.56445	M+Cl	C24H28N2O5	0	50.7	neg
neg_3145	3-Cyclopentylpropionic acid	metab_10131	1.25e-06	5.63e-06	1.7725	1.7662	1.9217	0.9424	yes	-	-	-	-	-	-	-	HMDB0245846	Organic acids and derivatives	Carboxylic acids and derivatives	Carboxylic acids	-	343.212	5.9627	2M+Hac-H	C8H14O2	0	37	neg
pos_3380	Barringtogenol C	metab_2627	0.01123	0.01486	1.7714	1.7621	9.763	3.2873	yes	C08931	-	-	-	-	-	-	HMDB0034525	Lipids and lipid-like molecules	Prenol lipids	Triterpenoids	17304-24-4;13844-01-4	513.353	6.02748	M+Na	C30H50O5	0	75.5	pos
pos_3136	Prostaglandin G2 2-glyceryl Ester	metab_2360	5.53e-07	2.28e-06	1.7707	1.7642	2.2022	1.139	yes	-	-	-	-	-	-	-	HMDB0062591	Lipids and lipid-like molecules	Fatty Acyls	Eicosanoids	-	460.29	5.38645	M+NH4	C23H38O8	0	75.2	pos
neg_5024	Gamma-CEHC glucuronide	metab_12211	0.005945	0.008326	1.7686	1.7947	0.3634	-1.4604	yes	-	-	-	-	-	-	-	HMDB0242175	Organic oxygen compounds	Organooxygen compounds	Carbohydrates and carbohydrate conjugates	-	485.167	5.79847	M+FA-H	C21H28O10	0	57.9	neg
pos_2746	2-Hydroxynevirapine	metab_1928	4.05e-05	9.26e-05	1.7669	1.7577	2.3572	1.2371	yes	C16608	-	-	map00982	Drug metabolism - cytochrome P450	Metabolism	Xenobiotics biodegradation and metabolism	PW_C008647;HMDB0013912	Benzenoids	Benzene and substituted derivatives	Phenylbutylamines	-	300.147	4.23732	M+NH4	C15H14N4O2	0	62.1	pos
pos_5433	9,10-Epoxy-18-hydroxy-octadecanoic acid	metab_4883	1.63e-07	8.31e-07	1.7626	1.7598	2.4218	1.2761	yes	C19620	-	-	map00073	Cutin, suberine and wax biosynthesis	Metabolism	Lipid metabolism	HMDB0302107	Lipids and lipid-like molecules	Fatty Acyls	Fatty acids and conjugates	-	353.206	5.37845	M+K	C18H34O4	0	60	pos
pos_5277	12-Ketodeoxycholic acid	metab_4710	3.64e-05	8.45e-05	1.7602	1.75	2.2675	1.1811	yes	-	-	-	-	-	-	-	HMDB0000328	Lipids and lipid-like molecules	Steroids and steroid derivatives	Bile acids, alcohols and derivatives	5130-29-0	413.264	5.73148	M+Na	C24H38O4	0	60	pos
pos_6393	Nalmefene	metab_5943	1.71e-11	1.49e-09	1.7592	1.7608	0.4208	-1.2487	yes	C08027	-	-	-	-	-	-	HMDB0255432	Benzenoids	Phenanthrenes and derivatives	Not Available	55096-26-9	403.198	3.5926	M+ACN+Na	C21H25NO3	0	41.3	pos
pos_4908	Glycochenodeoxycholate-3-sulfate	metab_4304	1.3e-08	1.22e-07	1.7537	1.7565	1.9189	0.9403	yes	-	-	-	-	-	-	-	HMDB0002497	Lipids and lipid-like molecules	Steroids and steroid derivatives	Bile acids, alcohols and derivatives	67030-54-0	562.304	6.12315	M+CH3OH+H	C26H43NO8S	0	67.7	pos
neg_5933	(4-Ethoxyphenyl)urea	metab_13218	0.001896	0.002939	1.7533	1.7593	0.2659	-1.9113	yes	C19415	-	-	-	-	-	-	HMDB0032565	Benzenoids	Benzene and substituted derivatives	N-phenylureas	150-69-6	419.194	4.4144	2M+Hac-H	C9H12N2O2	0	40.7	neg
neg_2915	Sedanonic acid	metab_9878	2.32e-05	6.12e-05	1.7529	1.744	3.8953	1.9617	yes	-	-	-	-	-	-	-	HMDB0032871	Organic acids and derivatives	Keto acids and derivatives	Gamma-keto acids and derivatives	6697-07-0	255.124	5.6461	M+FA-H	C12H18O3	0	39.3	neg
pos_2526	Aldosterone 18-glucuronide	metab_1687	6.94e-11	4.1e-09	1.7522	1.7545	0.4715	-1.0847	yes	C03033	-	-	map01100;map00040;map04976;map00053;map01240	Metabolic pathways;Pentose and glucuronate interconversions;Bile secretion;Ascorbate and aldarate metabolism;Biosynthesis of cofactors	Metabolism;Metabolism;Organismal Systems;Metabolism;Metabolism	Global and overview maps;Carbohydrate metabolism;Digestive system;Carbohydrate metabolism;Global and overview maps	LMST05010062;HMDB0010345	Lipids and lipid-like molecules	Steroids and steroid derivatives	Steroidal glycosides	3604-86-2	578.261	3.66497	M+ACN+H	C27H36O11	0	60.7	pos
pos_5963	PIP(5-iso PGF2VI/22:3(10Z,13Z,16Z))	metab_5465	1.16e-08	1.14e-07	1.751	1.7516	0.5287	-0.9196	yes	-	-	-	-	-	-	-	HMDB0280328	Not Available	Not Available	Not Available	-	538.264	4.30202	M+H+Na	C50H86O19P2	0	64.5	pos
neg_7132	2-Amino-4-oxo-4-alpha-hydroxy-6-(erythro-1',2',3'-trihydroxypropyl)-5,6,7,8-tetrahydroxypterin	metab_14544	0.0004003	0.0007299	1.7487	1.7346	0.4064	-1.299	yes	C05252	-	-	-	-	-	-	HMDB0012143	Organoheterocyclic compounds	Pteridines and derivatives	Pterins and derivatives	-	356.059	3.06012	M+Cl	C9H15N5O8	0	32.4	neg
pos_1617	Serylserine	metab_686	2.94e-05	6.96e-05	1.7483	1.7468	0.5318	-0.911	yes	-	-	-	-	-	-	-	HMDB0029048	Organic acids and derivatives	Carboxylic acids and derivatives	Amino acids, peptides, and analogues	6620-95-7	256.09	0.945833	M+H, M+ACN+Na	C6H12N2O5	0	30.7	pos
pos_227	PE(20:4/0:0)	metab_1403	0.0001364	0.0002715	1.7465	1.7407	0.5724	-0.8049	yes	-	-	-	-	-	-	-	LMGP02050009;HMDB0011517	Lipids and lipid-like molecules	Glycerophospholipids	Glycerophosphoethanolamines	652149-09-2	502.293	6.59972	M+H, M+Na, M+H-H2O	C25H44NO7P	66.7	0	pos
pos_1116	LysoPE(18:2(9Z,12Z)/0:0)	metab_131	0.005168	0.007238	1.7445	1.7506	0.5197	-0.9442	yes	-	-	-	-	-	-	-	HMDB0011507	Lipids and lipid-like molecules	Glycerophospholipids	Glycerophosphoethanolamines	85046-18-0	478.293	6.63155	M+H, M+Na	C23H44NO7P	0	83.6	pos
neg_4775	Cyclohexanecarboxylic acid	metab_11934	5.32e-05	0.0001234	1.7429	1.7351	2.2123	1.1455	yes	C09822	-	-	map01100;map00362;map01120	Metabolic pathways;Benzoate degradation;Microbial metabolism in diverse environments	Metabolism;Metabolism;Metabolism	Global and overview maps;Xenobiotics biodegradation and metabolism;Global and overview maps	HMDB0031342	Organic acids and derivatives	Carboxylic acids and derivatives	Carboxylic acids	98-89-5	315.181	5.98617	2M+Hac-H	C7H12O2	0	34.8	neg
neg_60	2-Deoxycastasterone	metab_13291	6.66e-08	5.83e-07	1.7404	1.7425	1.7724	0.8257	yes	C15793	-	-	map01100;map00905;map01110	Metabolic pathways;Brassinosteroid biosynthesis;Biosynthesis of secondary metabolites	Metabolism;Metabolism;Metabolism	Global and overview maps;Metabolism of terpenoids and polyketides;Global and overview maps	HMDB0034423	Lipids and lipid-like molecules	Steroids and steroid derivatives	Bile acids, alcohols and derivatives	87734-68-7	447.348	6.53893	M+Cl, M+FA-H, M-H	C28H48O4	0	38.2	neg
pos_6018	Nocardicin A	metab_5527	5.59e-12	7.53e-10	1.7379	1.74	0.5484	-0.8666	yes	C01941	Antibiotics	beta-Lactams	map01100;map01110;map07012;map00261	Metabolic pathways;Biosynthesis of secondary metabolites;Cephalosporins - parenteral agents;Monobactam biosynthesis	Metabolism;Metabolism;Drug Development;Metabolism	Global and overview maps;Global and overview maps;Chronology: Antiinfectives;Biosynthesis of other secondary metabolites	HMDB0255683	Organoheterocyclic compounds	Lactams	Beta lactams	39391-39-4	542.192	4.20532	M+ACN+H	C23H24N4O9	0	33.5	pos
pos_1622	Glycerophosphocholine	metab_692	1.75e-07	8.82e-07	1.7371	1.7319	0.5878	-0.7667	yes	C00670	-	-	map00565;map00564;map05231	Ether lipid metabolism;Glycerophospholipid metabolism;Choline metabolism in cancer	Metabolism;Metabolism;Human Diseases	Lipid metabolism;Lipid metabolism;Cancer: overview	HMDB0008425;HMDB0007962;HMDB0008194;HMDB0008524;HMDB0011222;HMDB0008358;HMDB0008488;HMDB0008161;HMDB0008490;HMDB0008523;HMDB0008489;HMDB0008357;HMDB0008588;HMDB0008818;HMDB0008061;HMDB0008360;HMDB0008325;HMDB0008817;HMDB0007931;HMDB0008259;HMDB0008687;HMDB0008718;HMDB0008587;HMDB0008094;HMDB0008721;HMDB0008653;HMDB0008030;HMDB0008063;HMDB0008787;HMDB0008227;HMDB0008261;HMDB0008226;HMDB0007928;HMD…	Lipids and lipid-like molecules	Glycerophospholipids	Glycerophosphocholines	28319-77-9	258.11	0.953583	M+H, M+NH4	C8H20NO6P	51.7	0	pos
pos_1643	Ser His	metab_714	3.73e-07	1.63e-06	1.7348	1.7343	0.5593	-0.8382	yes	-	-	-	-	-	-	-	-	-	-	-	-	243.109	0.9301	M+H, M+ACN+H	C9H14N4O4	76.6	0	pos
pos_2826	6-Epi-7-isocucurbic acid glucoside	metab_2016	2.24e-05	5.49e-05	1.7348	1.7498	0.4238	-1.2386	yes	-	-	-	-	-	-	-	HMDB0029782	Lipids and lipid-like molecules	Fatty Acyls	Fatty acyl glycosides	176486-13-8	407.226	4.43052	M+CH3OH+H	C18H30O8	0	73.2	pos
pos_4959	Contignasterol	metab_4360	1.09e-12	2.38e-10	1.7328	1.7319	1.8391	0.879	yes	C19902	-	-	-	-	-	-	HMDB0250439	Lipids and lipid-like molecules	Prenol lipids	Triterpenoids	137571-30-3	491.336	6.08332	M+H-H2O	C29H48O7	0	74.3	pos
neg_2531	Deoxyartemsinin	metab_9453	0.0004331	0.0007828	1.7326	1.7392	0.3181	-1.6526	yes	-	-	-	-	-	-	-	HMDB0060569	Organoheterocyclic compounds	Oxepanes	Not Available	-	303.102	4.97482	M+K-2H	C15H22O4	0	35.3	neg
pos_7173	Cis-3-Hexenyl b-primeveroside	metab_6805	2.26e-10	8.37e-09	1.732	1.7339	0.5199	-0.9438	yes	-	-	-	-	-	-	-	HMDB0031690	Lipids and lipid-like molecules	Fatty Acyls	Fatty acyl glycosides	132278-37-6	412.219	2.5483	M+NH4	C17H30O10	0	41.3	pos
pos_1937	5'-Deoxy-5-fluorouridine	metab_1037	7.98e-07	3.09e-06	1.7265	1.7283	0.5259	-0.9273	yes	C12739	-	-	map00983	Drug metabolism - other enzymes	Metabolism	Xenobiotics biodegradation and metabolism	PW_C040484;HMDB0060406	Nucleosides, nucleotides, and analogues	5''-deoxyribonucleosides	Not Available	3094-09-05	279.101	1.80538	M+CH3OH+H	C9H11FN2O5	0	45.1	pos
neg_6093	N-Formyl-met-leu-phe-lys	metab_13395	1.74e-08	2.18e-07	1.7262	1.7265	0.5274	-0.923	yes	-	-	-	-	-	-	-	HMDB0252432	Organic acids and derivatives	Carboxylic acids and derivatives	Amino acids, peptides, and analogues	-	600.264	4.19432	M+Cl	C27H43N5O6S	0	75.8	neg
pos_4911	Menthyl pyrrolidone carboxylate	metab_4308	1.77e-05	4.49e-05	1.7252	1.7188	1.8254	0.8682	yes	C03962	-	-	-	-	-	-	HMDB0032368	Lipids and lipid-like molecules	Prenol lipids	Terpene glycosides	52528-10-6	360.238	6.12315	M+ACN+H	C16H30O6	0	56.3	pos
pos_613	Simonin IV	metab_5651	4.65e-09	6.22e-08	1.7238	1.7221	0.5674	-0.8175	yes	-	-	-	-	-	-	-	HMDB0029977	Lipids and lipid-like molecules	Fatty Acyls	Fatty alcohols	151310-53-1	455.933	3.87463	M+2Na+H, M+2Na	C68H120O24	0	41.6	pos
pos_2907	DG(i-12:0/20:4(7E,9E,11Z,13E)-3OH(5S,6R,15S)/0:0)	metab_2105	1.63e-05	4.18e-05	1.7234	1.7237	0.4141	-1.272	yes	-	-	-	-	-	-	-	HMDB0298390	Not Available	Not Available	Not Available	-	327.202	4.67972	M+2Na	C35H60O8	0	59.2	pos
pos_102	7'-Carboxy-gamma-tocotrienol	metab_24	0.001486	0.002321	1.7198	1.7281	2.6965	1.4311	yes	-	-	-	-	-	-	-	HMDB0012851	Organoheterocyclic compounds	Benzopyrans	1-benzopyrans	1221262-26-5	315.195	4.67972	M+H-H2O, M+H, M+H-2H2O	C20H28O4	0	35.5	pos
neg_3489	Tetradecadienyl-l-carnitine	metab_10510	0.0004764	0.0008552	1.7176	1.7406	0.3648	-1.4546	yes	-	-	-	-	-	-	-	HMDB0258883	Lipids and lipid-like molecules	Fatty Acyls	Fatty acids and conjugates	-	374.27	6.60152	M+Na-2H	C21H39NO3	0	35.9	neg
pos_1796	Gln Lys	metab_883	0.001672	0.002584	1.7166	1.7305	0.452	-1.1456	yes	-	-	-	-	-	-	-	-	-	-	-	-	275.171	0.898817	M+H	C11H22N4O4	58.2	0	pos
pos_183	3-Methyluridine	metab_919	6.4e-12	7.87e-10	1.7145	1.7161	0.5326	-0.9088	yes	-	-	-	-	-	-	-	HMDB0004813	Nucleosides, nucleotides, and analogues	Pyrimidine nucleosides	Not Available	2140-69-4	259.092	1.916	M+H, M+Na, M+H-H2O	C10H14N2O6	0	53.2	pos
pos_4646	(ent-2b,4S,9a)-2,4,9-Trihydroxy-10(14)-oplopen-3-one 2-(2-methylbutanoate) 9-(3-methyl-2E-pentenoate)	metab_4017	1.69e-07	8.57e-07	1.7144	1.7158	1.5867	0.666	yes	-	-	-	-	-	-	-	HMDB0040993	Lipids and lipid-like molecules	Prenol lipids	Sesquiterpenoids	80489-86-7	413.266	6.40085	M+H-2H2O	C26H40O6	0	33.8	pos
neg_6074	Gibberellins	metab_13374	7.81e-10	2.82e-08	1.7092	1.7073	1.8738	0.906	yes	C01699	-	-	map01110;map00904	Biosynthesis of secondary metabolites;Diterpenoid biosynthesis	Metabolism;Metabolism	Global and overview maps;Metabolism of terpenoids and polyketides	HMDB0003559;HMDB0252716	Lipids and lipid-like molecules	Prenol lipids	Diterpenoids	1977-06-05	383.092	4.21782	M+K-2H	C19H22O6	0	37	neg
neg_778	N-hydroxy-L-tryptophan	metab_15114	1.75e-08	2.18e-07	1.7087	1.7113	0.5442	-0.8777	yes	C19716	-	-	-	-	-	-	HMDB0255152	Organoheterocyclic compounds	Indoles and derivatives	Indolyl carboxylic acids and derivatives	-	499.179	2.18385	M-H, 2M+Hac-H	C11H12N2O3	0	44.9	neg
neg_2016	Allyl-isopropyl-acetylharnstoff	metab_8885	3.05e-05	7.71e-05	1.7085	1.6976	0.4536	-1.1405	yes	-	-	-	-	-	-	-	HMDB0258084	Organic acids and derivatives	Organic carbonic acids and derivatives	Ureas	-	427.256	4.08403	2M+Hac-H	C9H16N2O2	0	30.6	neg
neg_276	4-(4-Fluorophenyl)-3-(4-hydroxy-3-methoxyphenoxymethyl)piperidine	metab_9705	0.002658	0.003999	1.7062	1.7167	0.4284	-1.2231	yes	-	-	-	-	-	-	-	HMDB0249389	Organoheterocyclic compounds	Piperidines	Phenylpiperidines	-	661.306	4.5596	M+FA-H, 2M-H	C19H22FNO3	0	54.9	neg
neg_1573	Gibberellin A8	metab_8392	7.02e-07	3.57e-06	1.7059	1.7044	2.353	1.2345	yes	C03579	-	-	map00904	Diterpenoid biosynthesis	Metabolism	Metabolism of terpenoids and polyketides	HMDB0303450;LMPR0104170005	Lipids and lipid-like molecules	Prenol lipids	Diterpenoids	7044-72-6	401.102	3.50913	M+K-2H	C19H24O7	0	50.7	neg
pos_7466	Asn Thr	metab_7122	0.001157	0.001845	1.7055	1.704	0.479	-1.0618	yes	-	-	-	-	-	-	-	-	-	-	-	-	234.108	0.945833	M+H	C8H15N3O5	75.2	0	pos
neg_3391	Sphingosine 1-phosphate	metab_10403	5.14e-05	0.00012	1.7033	1.715	2.1623	1.1126	yes	C06124	-	-	map01100;map04666;map05152;map00600;map04080;map04020;map04371;map04072;map04071	Metabolic pathways;Fc gamma R-mediated phagocytosis;Tuberculosis;Sphingolipid metabolism;Neuroactive ligand-receptor interaction;Calcium signaling pathway;Apelin signaling pathway;Phospholipase D signaling pathway;Sphingolipid signaling pathway	Metabolism;Organismal Systems;Human Diseases;Metabolism;Environmental Information Processing;Environmental Information Processing;Environmental Information Processing;Environmental Information Processing;Environmental Information Processing	Global and overview maps;Immune system;Infectious disease: bacterial;Lipid metabolism;Signaling molecules and interaction;Signal transduction;Signal transduction;Signal transduction;Signal transduction	PW_C000188;HMDB0000277	Lipids and lipid-like molecules	Sphingolipids	Phosphosphingolipids	26993-30-6	424.247	6.42952	M+FA-H	C18H38NO5P	0	31.1	neg
pos_3213	Gemfibrozil 1-O-beta-Glucuronide	metab_2445	5.02e-07	2.09e-06	1.7012	1.6946	1.9449	0.9597	yes	-	-	-	-	-	-	-	HMDB0247652	Organic oxygen compounds	Organooxygen compounds	Carbohydrates and carbohydrate conjugates	-	459.223	5.63553	M+CH3OH+H	C21H30O9	0	33.2	pos
pos_5130	Lucidenic acid N	metab_4549	2.63e-07	1.21e-06	1.6996	1.6952	1.9626	0.9728	yes	-	-	-	-	-	-	-	HMDB0038352	Phenylpropanoids and polyketides	Flavonoids	O-methylated flavonoids	364622-33-3	443.276	5.94782	M+H-H2O	C27H40O6	0	72.3	pos
neg_7072	3-Furanmethanol glucoside	metab_14478	1.77e-08	2.2e-07	1.6992	1.6981	2.1355	1.0945	yes	-	-	-	-	-	-	-	HMDB0032924	Organic oxygen compounds	Organooxygen compounds	Carbohydrates and carbohydrate conjugates	86425-28-7	241.072	3.22528	M-H2O-H	C11H16O7	0	47.7	neg
pos_1511	2',3'-Dideoxyuridine	metab_569	0.000212	0.0004038	1.6981	1.7094	0.499	-1.0029	yes	-	-	-	-	-	-	-	HMDB0245547	Nucleosides, nucleotides, and analogues	Pyrimidine nucleosides	Pyrimidine 2'',3''-dideoxyribonucleosides	-	230.114	2.93752	M+H, M+NH4	C9H12N2O4	0	37	pos
pos_2578	Norethindrone	metab_1744	0.0003866	0.000692	1.6966	1.6957	2.4879	1.3149	yes	C05028	-	-	-	-	-	-	LMST02030097;HMDB0014855	Lipids and lipid-like molecules	Steroids and steroid derivatives	Estrane steroids	68-22-4	321.181	3.80997	M+Na	C20H26O2	0	36.7	pos
pos_3314	Norcapsaicin	metab_2555	9.68e-05	0.0002008	1.6937	1.6931	2.0435	1.031	yes	-	-	-	-	-	-	-	HMDB0036327	Benzenoids	Phenols	Methoxyphenols	61229-08-1	621.328	5.90782	2M+K	C17H25NO3	0	37.5	pos
neg_291	L-Prolyl-4-hydroxy-L-prolin	metab_9872	9.13e-06	2.78e-05	1.6922	1.6917	0.4465	-1.1632	yes	-	-	-	-	-	-	-	HMDB0256781	Organic acids and derivatives	Carboxylic acids and derivatives	Amino acids, peptides, and analogues	-	515.236	4.76547	2M-H, 2M+Hac-H	C10H16N2O4	0	36.4	neg
neg_2076	2-Ethylsuberic acid	metab_8950	0.0002409	0.000463	1.6905	1.6784	2.7263	1.4469	yes	-	-	-	-	-	-	-	HMDB0059708	Lipids and lipid-like molecules	Fatty Acyls	Fatty acids and conjugates	3971-33-3	247.118	4.163	M+FA-H	C10H18O4	0	55.5	neg
pos_3472	Hydromorphone	metab_2727	8.95e-07	3.41e-06	1.6899	1.6905	1.6749	0.7441	yes	C07042	-	-	-	-	-	-	HMDB0014472;PW_C008858	Alkaloids and derivatives	Morphinans	Not Available	466-99-9	303.17	6.22658	M+NH4	C17H19NO3	0	32.8	pos
neg_7180	2-(Arabinosylamino)-3-(glucosylamino)propanenitrile	metab_14596	1.67e-10	1.19e-08	1.6877	1.689	0.514	-0.9603	yes	-	-	-	-	-	-	-	HMDB0039505	Organic oxygen compounds	Organooxygen compounds	Carbohydrates and carbohydrate conjugates	26401-22-9	360.141	2.39538	M-H2O-H	C14H25N3O9	0	46.1	neg
pos_2734	7-Hydroxytrideca-9,11-dienoylcarnitine	metab_1915	3.62e-05	8.4e-05	1.6876	1.6918	2.3973	1.2614	yes	-	-	-	-	-	-	-	HMDB0241335	Lipids and lipid-like molecules	Fatty Acyls	Fatty acid esters	-	402.285	4.1893	M+CH3OH+H	C20H35NO5	0	40.8	pos
pos_7511	L-erythro-4-Hydroxyarginine	metab_7172	6.9e-05	0.0001485	1.6872	1.6934	0.5381	-0.8942	yes	C08284	-	-	-	-	-	-	HMDB0034326	Organic acids and derivatives	Carboxylic acids and derivatives	Amino acids, peptides, and analogues	61370-10-3	232.14	0.882883	M+ACN+H	C6H14N4O3	0	60.6	pos
neg_5696	11-Dehydro-thromboxane B2	metab_12954	6.42e-13	6.19e-10	1.6864	1.686	2.0641	1.0455	yes	C05964	Lipids	Eicosanoids	map00590;map01100;map04726	Arachidonic acid metabolism;Metabolic pathways;Serotonergic synapse	Metabolism;Metabolism;Organismal Systems	Lipid metabolism;Global and overview maps;Nervous system	PW_C002104;LMFA03030004;HMDB0004242;LMFA03030014;HMDB0244347	Lipids and lipid-like molecules	Fatty Acyls	Eicosanoids	67910-12-7	367.212	4.76547	M-H	C20H32O6	0	42.2	neg
pos_2487	Hydroxyprolyl-Tryptophan	metab_1643	0.0001878	0.0003621	1.6864	1.681	0.4954	-1.0133	yes	-	-	-	-	-	-	-	HMDB0028874	Organic acids and derivatives	Carboxylic acids and derivatives	Amino acids, peptides, and analogues	-	318.145	3.5926	M+H	C16H19N3O4	0	62.6	pos
neg_7358	Hydroxyprolyl-Gamma-glutamate	metab_14790	2.86e-05	7.3e-05	1.6849	1.6846	0.4583	-1.1257	yes	-	-	-	-	-	-	-	HMDB0028877	Organic acids and derivatives	Carboxylic acids and derivatives	Amino acids, peptides, and analogues	-	304.115	0.993033	M+FA-H	C10H17N3O5	0	69.1	neg
pos_3078	(R)-Laudanidine	metab_2295	1.77e-07	8.91e-07	1.6836	1.6869	1.8903	0.9186	yes	C17592	-	-	map00950;map01110	Isoquinoline alkaloid biosynthesis;Biosynthesis of secondary metabolites	Metabolism;Metabolism	Biosynthesis of other secondary metabolites;Global and overview maps	HMDB0030211	Organoheterocyclic compounds	Isoquinolines and derivatives	Benzylisoquinolines	301-21-3	385.212	5.20977	M+ACN+H	C20H25NO4	0	39.7	pos
pos_6056	N-Acetyl-a-neuraminic acid	metab_5569	1.23e-06	4.47e-06	1.6751	1.6767	0.4588	-1.1241	yes	C19909	-	-	-	-	-	-	HMDB0000773	Organic oxygen compounds	Organooxygen compounds	Carbohydrates and carbohydrate conjugates	21646-00-4	274.092	4.12465	M+H-2H2O	C11H19NO9	0	63.5	pos
neg_6493	Gynocardin	metab_13836	7.93e-05	0.000174	1.6747	1.6823	0.4381	-1.1905	yes	C08331	-	-	-	-	-	-	HMDB0029913	Organic oxygen compounds	Organooxygen compounds	Carbohydrates and carbohydrate conjugates	14332-17-3	324.072	3.76165	M+Na-2H	C12H17NO8	0	49.7	neg
pos_1998	Acetyllycopsamine	metab_1104	0.0001527	0.0003007	1.6697	1.6708	0.5178	-0.9495	yes	C16751	-	-	-	-	-	-	HMDB0302357	Alkaloids and derivatives	Not Available	Not Available	73544-48-6	405.198	2.52433	M+ACN+Na	C17H27NO6	0	31.9	pos
pos_6159	5-Methoxytryptophan	metab_5683	0.001764	0.002715	1.669	1.6819	0.3528	-1.5029	yes	-	-	-	-	-	-	-	HMDB0002339	Organoheterocyclic compounds	Indoles and derivatives	Tryptamines and derivatives	2504-22-5	267.134	3.97132	M+CH3OH+H	C12H14N2O3	0	46.5	pos
pos_3536	Scymnol	metab_2796	3.12e-07	1.4e-06	1.6679	1.667	1.6118	0.6887	yes	C16260	-	-	-	-	-	-	LMST04030173;HMDB0258186	Lipids and lipid-like molecules	Steroids and steroid derivatives	Bile acids, alcohols and derivatives	6785-34-8	433.331	6.40085	M+H-2H2O	C27H48O6	0	60.9	pos
pos_7269	Gamma-Glutamylarginine	metab_6906	2.74e-10	9.5e-09	1.6674	1.6665	1.7111	0.7749	yes	-	-	-	-	-	-	-	HMDB0029143	Organic acids and derivatives	Carboxylic acids and derivatives	Amino acids, peptides, and analogues	31106-03-3	268.14	1.82925	M+H-2H2O	C11H21N5O5	0	31.9	pos
neg_6277	Cyclohexyl-[cyclohexyl(sulfo)amino]sulfamic acid	metab_13596	1.97e-06	7.96e-06	1.6651	1.6579	1.8713	0.9041	yes	-	-	-	-	-	-	-	HMDB0257601	Organic acids and derivatives	Sulfamic acid derivatives	Cyclamates	-	391.074	3.99718	M+Cl	C12H24N2O6S2	0	44.2	neg
pos_5248	Megestrol	metab_4678	2.35e-07	1.11e-06	1.6649	1.6623	2.0117	1.0084	yes	C07120	-	-	-	-	-	-	HMDB0014495;LMST02030177	Lipids and lipid-like molecules	Steroids and steroid derivatives	Pregnane steroids	3562-63-8	373.176	5.78008	M+2Na-H	C21H28O3	0	45.6	pos
pos_4492	3-Methyl-5-pentyl-2-furantridecanoic acid	metab_3847	1.14e-09	2.37e-08	1.6639	1.6657	1.6465	0.7194	yes	-	-	-	-	-	-	-	HMDB0061648	Lipids and lipid-like molecules	Fatty Acyls	Fatty acids and conjugates	57818-42-5	387.289	6.6394	M+Na	C23H40O3	0	65.3	pos
pos_6678	Demethylsuberosin	metab_6256	2.02e-06	6.84e-06	1.6619	1.6566	0.512	-0.9659	yes	C18083	-	-	map01061	Biosynthesis of phenylpropanoids	Metabolism	Chemical structure transformation maps	HMDB0304330	Phenylpropanoids and polyketides	Coumarins and derivatives	Hydroxycoumarins	21422-04-8	269.059	3.17705	M+K	C14H14O3	0	49.7	pos
neg_4774	Caffeic acid ester	metab_11933	4.35e-07	2.48e-06	1.6605	1.6571	1.7285	0.7895	yes	C10484	-	-	-	-	-	-	HMDB0302344	Phenylpropanoids and polyketides	Cinnamic acids and derivatives	Hydroxycinnamic acids and derivatives	-	329.103	5.98617	M+FA-H	C17H16O4	0	41.7	neg
pos_2911	5-Deoxymyricanone	metab_2110	3.92e-09	5.54e-08	1.6599	1.6575	1.8118	0.8574	yes	-	-	-	-	-	-	-	HMDB0030799	Phenylpropanoids and polyketides	Diarylheptanoids	Cyclic diarylheptanoids	110007-10-8	363.155	4.70437	M+Na	C21H24O4	0	53.7	pos
pos_2701	Dodeca-8,10-dienedioylcarnitine	metab_1879	1.45e-05	3.77e-05	1.6594	1.6512	0.4361	-1.1972	yes	-	-	-	-	-	-	-	HMDB0241270	Lipids and lipid-like molecules	Fatty Acyls	Fatty acid esters	-	433.23	4.1006	M+ACN+Na	C19H31NO6	0	38.5	pos
pos_6037	Alminoprofen	metab_5548	3.36e-06	1.07e-05	1.6565	1.6604	0.5917	-0.757	yes	-	-	-	-	-	-	-	HMDB0248170	Phenylpropanoids and polyketides	Phenylpropanoic acids	Not Available	-	480.282	4.14865	2M+ACN+H	C13H17NO2	0	37.1	pos
neg_2049	6-Hydroxypseudooxynicotine	metab_8920	0.0005015	0.0008972	1.6564	1.6654	0.3019	-1.7279	yes	C01297	-	-	map01100;map01120;map00760	Metabolic pathways;Microbial metabolism in diverse environments;Nicotinate and nicotinamide metabolism	Metabolism;Metabolism;Metabolism	Global and overview maps;Global and overview maps;Metabolism of cofactors and vitamins	HMDB0240264	Organic oxygen compounds	Organooxygen compounds	Carbonyl compounds	7424-35-3	447.228	4.11602	2M+Hac-H	C10H14N2O2	0	49.7	neg
pos_1684	Asp Pro Thr	metab_759	4.02e-06	1.25e-05	1.655	1.6565	0.5869	-0.7689	yes	-	-	-	-	-	-	-	-	-	-	-	-	332.145	1.5657	M+H-2H2O, M+H	C13H21N3O7	58.1	0	pos
pos_5926	Gamma-L-Glutamyl-gamma-L-glutamyl-L-methionine	metab_5424	2.91e-07	1.32e-06	1.6541	1.656	0.5203	-0.9427	yes	-	-	-	-	-	-	-	HMDB0038674	Organic acids and derivatives	Carboxylic acids and derivatives	Amino acids, peptides, and analogues	41515-84-8	449.17	4.3746	M+ACN+H	C15H25N3O8S	0	73	pos
pos_389	His His	metab_3181	1.11e-09	2.34e-08	1.6527	1.6555	0.5636	-0.8272	yes	-	-	-	-	-	-	-	-	-	-	-	-	293.135	2.13595	M+H-2H2O, M+H	C12H16N6O3	90	0	pos
pos_4708	Polypodine B	metab_4083	0.001045	0.001684	1.6505	1.6471	1.8778	0.909	yes	C08834	-	-	-	-	-	-	LMST01010198;HMDB0302993	Lipids and lipid-like molecules	Steroids and steroid derivatives	Bile acids, alcohols and derivatives	18069-14-2	514.337	6.32922	M+NH4	C27H44O8	0	51.6	pos
neg_475	Lexacalcitol	metab_11906	2.33e-09	5.6e-08	1.65	1.6461	1.5977	0.676	yes	-	-	-	-	-	-	-	HMDB0254070	Lipids and lipid-like molecules	Steroids and steroid derivatives	Vitamin D and derivatives	-	459.348	6.71877	M-H, M+Na-2H	C29H48O4	0	43.1	neg
pos_3119	MG(0:0/22:5(7Z,10Z,13Z,16Z,19Z)/0:0)	metab_2341	4.29e-08	2.9e-07	1.6498	1.6501	1.8205	0.8643	yes	-	-	-	-	-	-	-	LMGL01010037;HMDB0011556	Lipids and lipid-like molecules	Glycerolipids	Monoradylglycerols	-	443.254	5.32977	M+K	C25H40O4	0	47	pos
pos_3649	(+)-Dehydrovomifoliol	metab_2918	5.77e-13	1.63e-10	1.6495	1.6506	1.727	0.7883	yes	C02533	-	-	-	-	-	-	HMDB0302822	Lipids and lipid-like molecules	Prenol lipids	Sesquiterpenoids	-	205.122	6.8064	M+H-H2O	C13H18O3	0	78.9	pos
neg_6314	Alectrol	metab_13638	1.55e-08	2.05e-07	1.6492	1.6472	1.8119	0.8575	yes	C09059	-	-	-	-	-	-	HMDB0041372	Organoheterocyclic compounds	Lactones	Gamma butyrolactones	143572-84-3	383.092	3.95018	M+K-2H	C19H22O6	0	59.5	neg
pos_7155	5-Aminopentanal	metab_6785	1.28e-06	4.61e-06	1.649	1.6468	1.8039	0.8512	yes	C12455	-	-	map01100;map00960;map00310;map01110;map01120	Metabolic pathways;Tropane, piperidine and pyridine alkaloid biosynthesis;Lysine degradation;Biosynthesis of secondary metabolites;Microbial metabolism in diverse environments	Metabolism;Metabolism;Metabolism;Metabolism;Metabolism	Global and overview maps;Biosynthesis of other secondary metabolites;Amino acid metabolism;Global and overview maps;Global and overview maps	HMDB0012815	Organic oxygen compounds	Organooxygen compounds	Carbonyl compounds	-	244.202	2.58815	2M+ACN+H	C5H11NO	0	46.1	pos
pos_6112	3-Methylcrotonylglycine	metab_5632	4.83e-06	1.47e-05	1.6478	1.6376	0.4872	-1.0374	yes	C20828	-	-	-	-	-	-	HMDB0000459	Organic acids and derivatives	Carboxylic acids and derivatives	Amino acids, peptides, and analogues	33008-07-0	378.166	4.01997	2M+ACN+Na	C7H11NO3	0	34.1	pos
pos_5262	3-chloro-N-[1-oxo-3-phenyl-1-(4-pyridin-2-ylpiperazin-1-yl)propan-2-yl]benzamide	metab_4694	1.79e-11	1.52e-09	1.6414	1.6428	0.5219	-0.9382	yes	-	-	-	-	-	-	-	-	-	-	-	-	449.178	5.76348	M+H	C25H25ClN4O2	75.7	0	pos
pos_2138	(R)-2-Hydroxy-2H-1,4-benzoxazin-3(4H)-one	metab_1259	4.07e-09	5.71e-08	1.6408	1.6385	1.7776	0.8299	yes	C15769	-	-	map00402;map01110	Benzoxazinoid biosynthesis;Biosynthesis of secondary metabolites	Metabolism;Metabolism	Biosynthesis of other secondary metabolites;Global and overview maps	HMDB0038318	Organoheterocyclic compounds	Benzoxazines	Benzoxazinones	-	198.076	2.82723	M+CH3OH+H	C8H7NO3	0	45.2	pos
pos_1152	LysoPC(20:5(5Z,8Z,11Z,14Z,17Z)/0:0)	metab_171	6.17e-09	7.33e-08	1.6403	1.6437	0.6562	-0.6078	yes	C04230	Lipids	Phospholipids	map00564;map05231	Glycerophospholipid metabolism;Choline metabolism in cancer	Metabolism;Human Diseases	Lipid metabolism;Cancer: overview	HMDB0010397	Lipids and lipid-like molecules	Glycerophospholipids	Glycerophosphocholines	-	542.324	6.52018	M+H, M+Na	C28H48NO7P	0	86	pos
neg_48	Isofloxythepin	metab_11961	0.0001898	0.0003739	1.6391	1.6395	0.4825	-1.0515	yes	-	-	-	-	-	-	-	HMDB0253639	Organoheterocyclic compounds	Benzothiepins	Dibenzothiepins	-	445.195	3.2331	M+Na-2H, M+FA-H, M-H	C23H29FN2OS	0	41.9	neg
pos_1117	4a-Carboxy-4b-methyl-5a-cholesta-8,24-dien-3b-ol	metab_132	2e-11	1.66e-09	1.639	1.6408	1.4773	0.563	yes	C15808	-	-	map01100;map01110;map00100	Metabolic pathways;Biosynthesis of secondary metabolites;Steroid biosynthesis	Metabolism;Metabolism;Metabolism	Global and overview maps;Global and overview maps;Lipid metabolism	HMDB0062383;HMDB0001181	Lipids and lipid-like molecules	Prenol lipids	Triterpenoids	-	443.352	6.63155	M+H-H2O, M+H	C29H46O3	0	65.6	pos
pos_2758	Capsianoside V	metab_1941	1.35e-10	6.35e-09	1.6386	1.6395	0.525	-0.9295	yes	-	-	-	-	-	-	-	HMDB0030737	Lipids and lipid-like molecules	Prenol lipids	Terpene glycosides	121924-06-9	532.312	4.26132	M+NH4	C26H42O10	0	44.5	pos
pos_2532	Trans-zeatin riboside	metab_1694	2.01e-08	1.67e-07	1.6383	1.6426	0.4815	-1.0545	yes	C16431	-	-	map01110;map00908	Biosynthesis of secondary metabolites;Zeatin biosynthesis	Metabolism;Metabolism	Global and overview maps;Metabolism of terpenoids and polyketides	HMDB0304506;HMDB0030388	Nucleosides, nucleotides, and analogues	Purine nucleosides	Not Available	6025-53-2	415.171	3.68145	M+ACN+Na	C15H21N5O5	0	37.8	pos
pos_5946	Muramic acid	metab_5446	3.75e-11	2.59e-09	1.6361	1.6382	0.4869	-1.0383	yes	C06470	Carbohydrates	Monosaccharides	-	-	-	-	HMDB0003254;HMDB0248237	Organic oxygen compounds	Organooxygen compounds	Carbohydrates and carbohydrate conjugates	1114-41-6	274.092	4.34202	M+Na	C9H17NO7	0	67	pos
pos_3341	Pisumoside B	metab_2585	2.76e-07	1.27e-06	1.6358	1.6412	1.7317	0.7922	yes	-	-	-	-	-	-	-	HMDB0037125	Lipids and lipid-like molecules	Prenol lipids	Terpene glycosides	333334-43-3	657.313	5.94782	M+H-2H2O	C32H52O16	0	31	pos
pos_3019	2-(9-acetyl-1-oxa-9-azaspiro[5.5]undecan-4-yl)acetic acid	metab_2230	0.0007573	0.001261	1.6345	1.6188	2.5913	1.3737	yes	-	-	-	-	-	-	-	-	-	-	-	-	256.154	5.04175	M+H	C13H21NO4	40.5	0	pos
pos_6968	Thymidine	metab_6576	2.22e-06	7.41e-06	1.6341	1.626	2.388	1.2558	yes	C00214	Nucleic acids	Nucleosides	map00240;map01100	Pyrimidine metabolism;Metabolic pathways	Metabolism;Metabolism	Nucleotide metabolism;Global and overview maps	PW_C000187;HMDB0000273;MJDBOTE0000448	Nucleosides, nucleotides, and analogues	Pyrimidine nucleosides	Pyrimidine 2''-deoxyribonucleosides	50-89-5	275.123	2.8037	M+CH3OH+H	C10H14N2O5	0	32.1	pos
neg_6211	Cynaropicrin	metab_15369	1.1e-10	8.91e-09	1.633	1.6312	1.8363	0.8768	yes	C09385	-	-	-	-	-	-	HMDB0036423	Lipids and lipid-like molecules	Prenol lipids	Terpene lactones	35730-78-0	383.092	4.06838	M+K-2H	C19H22O6	0	57.5	neg
neg_4892	Evogliptin	metab_12063	0.0004125	0.0007495	1.6315	1.637	2.4327	1.2826	yes	-	-	-	-	-	-	-	HMDB0252139	Organic acids and derivatives	Peptidomimetics	Hybrid peptides	-	446.193	5.90783	M+FA-H	C19H26F3N3O3	0	60.6	neg
neg_7062	Psoralidin	metab_14467	1.28e-06	5.74e-06	1.6314	1.6326	1.9699	0.9781	yes	C10523	-	-	-	-	-	-	HMDB0034050;LMPK12090007;MJDBOTE0001199	Phenylpropanoids and polyketides	Isoflavonoids	Coumestans	18642-23-4	357.076	3.2331	M+Na-2H	C20H16O5	0	42.2	neg
neg_7087	(3R,5S)-1-pyrroline-3-hydroxy-5-carboxylic Acid	metab_14494	2.86e-10	1.62e-08	1.6283	1.6299	0.4993	-1.0022	yes	C04281	-	-	map01100;map00330	Metabolic pathways;Arginine and proline metabolism	Metabolism;Metabolism	Global and overview maps;Amino acid metabolism	HMDB0062585	Organic acids and derivatives	Carboxylic acids and derivatives	Amino acids, peptides, and analogues	-	386.12	3.20182	3M-H	C5H7NO3	0	41.9	neg
neg_2399	DG(8:0/0:0/22:6(5Z,8E,10Z,13Z,15E,19Z)-2OH(7S, 17S))	metab_9305	1.87e-08	2.3e-07	1.628	1.6285	0.5871	-0.7683	yes	-	-	-	-	-	-	-	HMDB0297201	Not Available	Not Available	Not Available	-	605.367	4.7089	M+FA-H	C33H52O7	0	51.9	neg
pos_5022	Gibberellin A14	metab_4432	3.62e-05	8.4e-05	1.627	1.6211	1.8191	0.8632	yes	C11858	-	-	map01100;map00904;map01110	Metabolic pathways;Diterpenoid biosynthesis;Biosynthesis of secondary metabolites	Metabolism;Metabolism;Metabolism	Global and overview maps;Metabolism of terpenoids and polyketides;Global and overview maps	HMDB0303454;LMPR0104170015	Lipids and lipid-like molecules	Prenol lipids	Diterpenoids	4955-22-0	381.227	6.04348	M+CH3OH+H	C20H28O5	0	34.1	pos
neg_5254	2-Hydroxypropyl octanoate	metab_12466	0.0001431	0.0002916	1.6254	1.6147	1.8955	0.9225	yes	-	-	-	-	-	-	-	HMDB0245164	Lipids and lipid-like molecules	Fatty Acyls	Fatty acid esters	-	247.155	5.43392	M+FA-H	C11H22O3	0	40.1	neg
pos_5274	Capsianside A	metab_4707	3.89e-10	1.17e-08	1.6245	1.6255	0.5873	-0.7678	yes	C17516	-	-	-	-	-	-	HMDB0034044	Lipids and lipid-like molecules	Fatty Acyls	Fatty acyl glycosides	116107-40-5	794.396	5.73148	M+H+Na	C76H124O33	0	34.1	pos
neg_7298	(1S,3R,4R)-8,10-Dihydroxyfenchone 10-O-b-D-glucoside	metab_14725	7.39e-10	2.78e-08	1.6242	1.6261	0.5203	-0.9425	yes	-	-	-	-	-	-	-	HMDB0033223	Lipids and lipid-like molecules	Prenol lipids	Terpene glycosides	217960-77-5	367.136	1.32992	M+Na-2H	C16H26O8	0	67.4	neg
pos_6337	PIP(PGE1/22:3(10Z,13Z,16Z))	metab_5881	1.2e-10	5.95e-09	1.6236	1.6248	0.5623	-0.8305	yes	-	-	-	-	-	-	-	HMDB0280376	Not Available	Not Available	Not Available	-	541.28	3.66497	M+2H	C52H90O19P2	0	86.1	pos
pos_6721	Arphamenine B	metab_6305	5.29e-07	2.19e-06	1.6224	1.6168	0.5847	-0.7742	yes	-	-	-	-	-	-	-	HMDB0248615	Organic acids and derivatives	Carboxylic acids and derivatives	Amino acids, peptides, and analogues	-	369.213	3.1132	M+CH3OH+H	C16H24N4O4	0	41.3	pos
pos_6147	Octanoylglucuronide	metab_5670	0.006189	0.008549	1.6215	1.6214	0.308	-1.6991	yes	-	-	-	-	-	-	-	HMDB0010347	Organic oxygen compounds	Organooxygen compounds	Carbohydrates and carbohydrate conjugates	99910-55-1	343.136	3.97932	M+Na	C14H24O8	0	54.3	pos
pos_47	4-Hydroxyproline galactoside	metab_4073	1.8e-09	3.13e-08	1.6213	1.6196	1.5123	0.5967	yes	-	-	-	-	-	-	-	HMDB0029354	Lipids and lipid-like molecules	Fatty Acyls	Fatty alcohol esters	80185-44-0	276.108	2.51633	M+H-H2O, M+H, M+Na, M+K	C11H19NO8	0	54.5	pos
neg_1969	PA(10:0/8:0)	metab_8831	6.59e-05	0.0001484	1.6195	1.6097	0.483	-1.0498	yes	C00416	Lipids	Phospholipids	map01100;map00564;map01110;map00561;map05212;map05200;map04975;map04024;map05231;map04072;map04912;map04070;map04666	Metabolic pathways;Glycerophospholipid metabolism;Biosynthesis of secondary metabolites;Glycerolipid metabolism;Pancreatic cancer;Pathways in cancer;Fat digestion and absorption;cAMP signaling pathway;Choline metabolism in cancer;Phospholipase D signaling pathway;GnRH signaling pathway;Phosphatidylinositol signaling system;Fc gamma R-mediated phagocytosis	Metabolism;Metabolism;Metabolism;Metabolism;Human Diseases;Human Diseases;Organismal Systems;Environmental Information Processing;Human Diseases;Environmental Information Processing;Organismal Systems;Environmental Information Processing;Organismal Systems	Global and overview maps;Lipid metabolism;Global and overview maps;Lipid metabolism;Cancer: specific types;Cancer: overview;Digestive system;Signal transduction;Cancer: overview;Signal transduction;Endocrine system;Signal transduction;Immune system	PW_C062193;HMDB0114778	Lipids and lipid-like molecules	Glycerophospholipids	Glycerophosphates	-	473.226	4.02132	M+Na-2H	C21H41O8P	0	37.6	neg
neg_1619	3-Benzyl-5-(6-carboxyhexyl)-1-(2-cyclohexyl-2-hydroxyethylamino)hydantoin	metab_8443	1.92e-07	1.3e-06	1.6192	1.6199	0.5911	-0.7586	yes	-	-	-	-	-	-	-	HMDB0249489	Organoheterocyclic compounds	Azolidines	Imidazolidines	-	440.251	3.56445	M-H2O-H	C25H37N3O5	0	48.7	neg
pos_5023	19-Norandrostenedione	metab_4433	5.46e-08	3.48e-07	1.6183	1.6176	1.697	0.763	yes	C14500	-	-	-	-	-	-	HMDB0244836	Lipids and lipid-like molecules	Steroids and steroid derivatives	Estrane steroids	734-32-7	317.149	6.04348	M+2Na-H	C18H24O2	0	42.5	pos
neg_5860	Dihydroergocryptine	metab_13137	3.8e-10	1.9e-08	1.6167	1.6178	0.5321	-0.9104	yes	-	-	-	-	-	-	-	HMDB0251310	Lipids and lipid-like molecules	Steroids and steroid derivatives	Steroid lactones	-	612.3	4.5145	M+Cl	C32H43N5O5	0	48.3	neg
neg_473	(3beta,22R,23R,24S)-3,22,23-Trihydroxystigmastan-6-one	metab_11884	3.9e-12	1.65e-09	1.6163	1.6153	1.6523	0.7245	yes	-	-	-	-	-	-	-	HMDB0039713	Lipids and lipid-like molecules	Steroids and steroid derivatives	Stigmastanes and derivatives	90524-90-6	461.364	6.60152	M-H, M+Cl	C29H50O4	0	44.2	neg
pos_7084	Tetrahydroharmine	metab_6706	9.09e-09	9.69e-08	1.6155	1.6149	1.981	0.9863	yes	C09243	-	-	map01063	Biosynthesis of alkaloids derived from shikimate pathway	Metabolism	Chemical structure transformation maps	HMDB0254015	Alkaloids and derivatives	Harmala alkaloids	Not Available	17019-01-1	239.114	2.72415	M+Na	C13H16N2O	0	34.4	pos
neg_4812	(1(10)E,4E,6a,9b)-9-(2-Methylpropanoyloxy)-1(10),4,11(13)-germacratrien-12,6-olide	metab_11976	2.23e-07	1.47e-06	1.615	1.6159	1.8634	0.8979	yes	-	-	-	-	-	-	-	HMDB0031373	Lipids and lipid-like molecules	Prenol lipids	Terpene lactones	-	363.181	5.95487	M+FA-H	C19H26O4	0	38.8	neg
neg_5300	Physagulin D	metab_12517	2.73e-10	1.61e-08	1.6146	1.6162	0.516	-0.9545	yes	-	-	-	-	-	-	-	HMDB0041049;LMST01160046	Lipids and lipid-like molecules	Steroids and steroid derivatives	Steroid lactones	146713-92-0	619.346	5.35798	M-H	C34H52O10	0	39	neg
pos_3225	Deltaline	metab_2458	2.58e-11	1.98e-09	1.6145	1.6163	0.5989	-0.7397	yes	C08679	-	-	-	-	-	-	HMDB0250984	Lipids and lipid-like molecules	Prenol lipids	Diterpenoids	6836-11-09	549.32	5.67548	M+ACN+H	C27H41NO8	0	43.3	pos
pos_3243	5-Oxo-prolyl-glycyl-arginine-4-nitroanilide	metab_2478	1.17e-09	2.39e-08	1.6141	1.6133	1.811	0.8568	yes	-	-	-	-	-	-	-	HMDB0250211	Organic acids and derivatives	Carboxylic acids and derivatives	Amino acids, peptides, and analogues	-	445.196	5.73148	M+H-H2O	C19H26N8O6	0	58.4	pos
pos_6021	2',2'-Difluorodeoxyuridine	metab_5531	1.57e-11	1.45e-09	1.6138	1.6158	0.5294	-0.9174	yes	-	-	-	-	-	-	-	HMDB0060727	Nucleosides, nucleotides, and analogues	Pyrimidine nucleosides	Pyrimidine 2''-deoxyribonucleosides	-	282.091	4.20532	M+NH4	C9H10F2N2O5	0	36.5	pos
pos_2684	2-Methoxy-estradiol-17b 3-glucuronide	metab_1859	4.66e-11	3.03e-09	1.6127	1.6139	0.5158	-0.955	yes	C11131	-	-	map00140	Steroid hormone biosynthesis	Metabolism	Lipid metabolism	HMDB0006765	Lipids and lipid-like molecules	Steroids and steroid derivatives	Steroidal glycosides	-	443.203	4.04395	M+H-2H2O	C25H34O9	0	53.7	pos
pos_2968	VASICINONE	metab_2172	5.7e-11	3.45e-09	1.6124	1.6124	1.8871	0.9162	yes	C10744	-	-	-	-	-	-	HMDB0259770	Organoheterocyclic compounds	Diazanaphthalenes	Benzodiazines	486-64-6	235.108	4.88107	M+CH3OH+H	C11H10N2O2	0	59.4	pos
neg_2409	5,6-epoxy,18R-HEPE	metab_9317	6.6e-07	3.42e-06	1.6124	1.6173	2.0993	1.0699	yes	C18175	-	-	-	-	-	-	HMDB0062410	Lipids and lipid-like molecules	Fatty Acyls	Fatty alcohols	-	353.172	4.73832	M+Na-2H	C20H28O4	0	60.2	neg
neg_4260	Porrigenin A	metab_11365	0.0005886	0.001032	1.6122	1.6001	0.5621	-0.831	yes	-	-	-	-	-	-	-	HMDB0032783;LMST01080001	Lipids and lipid-like molecules	Prenol lipids	Triterpenoids	196607-75-7	485.267	6.68757	M+K-2H	C27H44O5	0	35	neg
pos_4626	N-Oleoyl Arginine	metab_3995	6.69e-09	7.8e-08	1.6115	1.616	0.6581	-0.6035	yes	-	-	-	-	-	-	-	HMDB0241954	Not Available	Not Available	Not Available	-	439.364	6.44852	M+H	C24H46N4O3	0	80.6	pos
pos_2630	Delta-CEHC	metab_1801	9.65e-07	3.63e-06	1.6112	1.606	1.8543	0.8909	yes	-	-	-	-	-	-	-	HMDB0242106	Organoheterocyclic compounds	Benzopyrans	1-benzopyrans	-	251.128	3.9393	M+H	C14H18O4	55.7	0	pos
pos_6908	Validamycin A	metab_6510	4.41e-05	9.98e-05	1.6109	1.6088	0.6282	-0.6708	yes	C12112	-	-	map01100;map01110;map00525	Metabolic pathways;Biosynthesis of secondary metabolites;Acarbose and validamycin biosynthesis	Metabolism;Metabolism;Metabolism	Global and overview maps;Global and overview maps;Biosynthesis of other secondary metabolites	HMDB0036592	Organic oxygen compounds	Organooxygen compounds	Carbohydrates and carbohydrate conjugates	37248-47-8	515.246	2.87382	M+NH4	C20H35NO13	0	67.9	pos
pos_6454	Ile Phe Gln	metab_6011	0.0001465	0.0002899	1.6098	1.626	0.5014	-0.9959	yes	-	-	-	-	-	-	-	-	-	-	-	-	407.228	3.5041	M+H	C20H30N4O5	94.2	0	pos
neg_3181	Riesling acetal	metab_10171	4.71e-06	1.61e-05	1.6098	1.602	1.8023	0.8498	yes	-	-	-	-	-	-	-	HMDB0037562	Organoheterocyclic compounds	Tetrahydrofurans	Not Available	-	271.155	6.0095	M+FA-H	C13H22O3	0	79.1	neg
neg_7059	Cascarillin	metab_14463	4.75e-10	2.09e-08	1.6095	1.6107	0.537	-0.8971	yes	C09071	-	-	-	-	-	-	HMDB0036836	Lipids and lipid-like molecules	Prenol lipids	Diterpenoids	10118-56-6	453.21	3.2331	M+FA-H	C22H32O7	0	65.6	neg
pos_6885	5-Aminosalicylic Acid	metab_6484	1.95e-07	9.58e-07	1.6092	1.6055	1.7856	0.8364	yes	-	-	-	-	-	-	-	HMDB0014389	Benzenoids	Benzene and substituted derivatives	Benzoic acids and derivatives	89-57-6	154.05	2.9057	M+H	C7H7NO3	32.9	0	pos
neg_2641	O-Tyrosine	metab_9575	4.88e-10	2.09e-08	1.6082	1.6075	1.7763	0.8288	yes	-	-	-	-	-	-	-	HMDB0006050	Organic acids and derivatives	Carboxylic acids and derivatives	Amino acids, peptides, and analogues	2370-61-8	361.141	5.1618	2M-H	C9H11NO3	0	47.1	neg
pos_1824	METHACHOLINE	metab_913	3.02e-07	1.36e-06	1.6076	1.6081	1.6169	0.6933	yes	C07471	-	-	-	-	-	-	HMDB0015654	Organic nitrogen compounds	Organonitrogen compounds	Quaternary ammonium salts	55-92-5	160.133	0.992917	M+H	C8H17NO2	35.4	0	pos
pos_2226	Aceneuramic acid	metab_1356	1.37e-11	1.33e-09	1.6043	1.6063	0.564	-0.8263	yes	C19910	-	-	-	-	-	-	HMDB0000230;HMDB0259583	Organic oxygen compounds	Organooxygen compounds	Carbohydrates and carbohydrate conjugates	19342-33-7	274.092	3.01718	M+H-2H2O	C11H19NO9	0	34.4	pos
pos_5420	6-Hydroxymelatonin glucuronide	metab_4869	0.0007122	0.001193	1.6042	1.6208	0.4679	-1.0959	yes	-	-	-	-	-	-	-	HMDB0060786	Organic oxygen compounds	Organooxygen compounds	Carbohydrates and carbohydrate conjugates	-	457.183	5.40247	M+CH3OH+H	C19H24N2O9	0	54.6	pos
pos_5688	11,12-DiHETrE	metab_5160	6.9e-07	2.74e-06	1.6037	1.6046	1.7848	0.8357	yes	C14774	-	-	map00590;map01100;map04726	Arachidonic acid metabolism;Metabolic pathways;Serotonergic synapse	Metabolism;Metabolism;Organismal Systems	Lipid metabolism;Global and overview maps;Nervous system	HMDB0002314;PW_C001562	Lipids and lipid-like molecules	Fatty Acyls	Eicosanoids	192461-95-3	402.263	4.85707	M+ACN+Na	C20H34O4	0	74.1	pos
pos_7289	QUISQUALIC ACID	metab_6928	5e-11	3.15e-09	1.6007	1.5993	1.8277	0.87	yes	C08296	-	-	-	-	-	-	HMDB0257060	Organic acids and derivatives	Carboxylic acids and derivatives	Amino acids, peptides, and analogues	52809-07-1	154.025	1.77357	M+H-2H2O	C5H7N3O5	0	43.9	pos
neg_4777	11-Hydroxy-9-tridecenoic acid	metab_11936	1.94e-05	5.24e-05	1.6005	1.5912	1.6956	0.7618	yes	-	-	-	-	-	-	-	HMDB0035881;LMFA01050437	Lipids and lipid-like molecules	Fatty Acyls	Fatty acids and conjugates	105798-56-9	273.171	5.98617	M+FA-H	C13H24O3	0	59.3	neg
neg_5261	1-(beta-D-Glucopyranosyloxy)-3-octanone	metab_12474	7.3e-08	6.25e-07	1.5961	1.5912	1.9188	0.9402	yes	-	-	-	-	-	-	-	HMDB0031315	Lipids and lipid-like molecules	Fatty Acyls	Fatty acyl glycosides	194919-40-9	305.16	5.42703	M-H	C14H26O7	0	39.2	neg
neg_4943	N-Oleoyl Glutamine	metab_12120	6.14e-08	5.51e-07	1.5958	1.5961	0.5539	-0.8522	yes	-	-	-	-	-	-	-	HMDB0241958;LMFA08020128	Organic acids and derivatives	Carboxylic acids and derivatives	Amino acids, peptides, and analogues	-	447.261	5.87652	M+K-2H	C23H42N2O4	0	40.7	neg
pos_4641	14-(Hydroxymethyl)-5,9-dimethyltetracyclo[11.2.1.0~1,10~.0~4,9~]hexadecan-5-ol	metab_4012	3.97e-06	1.24e-05	1.5948	1.5887	1.5507	0.6329	yes	-	-	-	-	-	-	-	-	-	-	-	-	293.247	6.41685	M+H	C19H32O2	45.3	0	pos
neg_3074	3-hydroxypristanic acid	metab_10053	0.0005304	0.0009424	1.5945	1.5802	2.3646	1.2416	yes	-	-	-	-	-	-	-	HMDB0061651	Lipids and lipid-like molecules	Prenol lipids	Diterpenoids	-	351.228	5.9	M+K-2H	C19H38O3	0	32.8	neg
neg_3408	7a,12a-Dihydroxy-5b-cholestan-3-one	metab_10422	4e-10	1.9e-08	1.5941	1.5926	1.6656	0.7361	yes	C05453	-	-	map01100;map00120	Metabolic pathways;Primary bile acid biosynthesis	Metabolism;Metabolism	Global and overview maps;Lipid metabolism	HMDB0006887;PW_C002989	Lipids and lipid-like molecules	Glycerolipids	Diradylglycerols	-	463.343	6.46068	M+FA-H	C27H46O3	0	30.7	neg
neg_6296	PC(20:5(7Z,9Z,11E,13E,17Z)-3OH(5,6,15)/2:0)	metab_13617	5e-10	2.11e-08	1.5932	1.5945	0.5429	-0.8811	yes	-	-	-	-	-	-	-	HMDB0288873	Not Available	Not Available	Not Available	-	630.31	3.96585	M-H	C30H50NO11P	0	75.1	neg
pos_6489	Asp Glu Leu	metab_6049	0.0004688	0.0008169	1.5928	1.5804	0.5523	-0.8564	yes	-	-	-	-	-	-	-	-	-	-	-	-	376.171	3.44808	M+H	C15H25N3O8	70.4	0	pos
pos_5511	1-Heptadecanoylglycerophosphoethanolamine	metab_4967	0.0002421	0.0004544	1.5922	1.6103	1.9279	0.947	yes	-	-	-	-	-	-	-	HMDB0061691	Lipids and lipid-like molecules	Glycerophospholipids	Glycerophosphoethanolamines	-	490.291	5.22577	M+Na	C22H46NO7P	0	48.1	pos
pos_4398	3-beta-Hydroxy-4-beta-methyl-5-alpha-cholest-7-ene-4-alpha-carboxylate	metab_3742	2.02e-11	1.66e-09	1.5921	1.5934	1.4294	0.5154	yes	C04840	-	-	-	-	-	-	HMDB0011662	Lipids and lipid-like molecules	Steroids and steroid derivatives	Cholestane steroids	-	427.357	6.8064	M+H-H2O	C29H48O3	0	51.1	pos
neg_6679	Phyllanthusol B	metab_14041	4.62e-09	8.91e-08	1.5895	1.5889	1.657	0.7285	yes	-	-	-	-	-	-	-	HMDB0035904	Organic oxygen compounds	Organooxygen compounds	Carbohydrates and carbohydrate conjugates	294864-89-4	752.273	3.56445	M-H2O-H	C35H49NO18	0	94.8	neg
neg_725	(3E)-Glutaconylcarnitin	metab_14673	8.02e-07	3.97e-06	1.5882	1.5829	0.392	-1.3509	yes	-	-	-	-	-	-	-	HMDB0241662	Lipids and lipid-like molecules	Fatty Acyls	Fatty acid esters	-	545.237	4.5361	M+Na-2H, 2M-H	C12H19NO6	0	49.4	neg
neg_7111	Tryptophan glutamate	metab_14521	0.0001498	0.0003039	1.5865	1.5909	0.5219	-0.938	yes	-	-	-	-	-	-	-	HMDB0259308	Organic acids and derivatives	Carboxylic acids and derivatives	Amino acids, peptides, and analogues	-	348.123	3.15415	M-H	C16H19N3O6	0	73.5	neg
pos_3075	Kanokoside C	metab_2292	5.04e-06	1.52e-05	1.5859	1.5779	1.7791	0.8311	yes	C17430	-	-	-	-	-	-	HMDB0035305	Organic oxygen compounds	Organooxygen compounds	Carbonyl compounds	64703-87-3	671.274	5.19377	M+CH3OH+H	C27H42O17	0	47	pos
neg_1042	Glutaminylasparagine	metab_7805	4.34e-10	1.98e-08	1.5836	1.5851	0.5729	-0.8036	yes	-	-	-	-	-	-	-	HMDB0028792	Organic acids and derivatives	Carboxylic acids and derivatives	Amino acids, peptides, and analogues	14608-79-8	259.105	0.946067	M-H	C9H16N4O5	0	37.9	neg
pos_3459	Deoxycholylarginine	metab_2712	3.16e-11	2.25e-09	1.5826	1.5831	0.6577	-0.6045	yes	-	-	-	-	-	-	-	HMDB0242418	Not Available	Not Available	Not Available	-	549.401	6.1868	M+H	C30H52N4O5	0	42.3	pos
neg_131	2-Aminoacrylic acid	metab_8101	1.97e-05	5.32e-05	1.5816	1.5842	0.608	-0.7178	yes	C02218	-	-	map01100;map00270	Metabolic pathways;Cysteine and methionine metabolism	Metabolism;Metabolism	Global and overview maps;Amino acid metabolism	PW_C001938;HMDB0003609	Organic acids and derivatives	Carboxylic acids and derivatives	Amino acids, peptides, and analogues	1948-56-7;28453-71-6	233.078	0.9539	2M+Hac-H, 3M-H	C3H5NO2	0	34.7	neg
neg_3012	(4R,6S)-p-Menth-1-ene-4,6-diol 4-glucoside	metab_9985	1.64e-05	4.57e-05	1.5807	1.5793	2.1197	1.0839	yes	-	-	-	-	-	-	-	HMDB0038980	Lipids and lipid-like molecules	Prenol lipids	Terpene glycosides	359875-78-8	331.176	5.83668	M-H	C16H28O7	0	46.1	neg
pos_6130	Berberine	metab_5652	7.28e-06	2.07e-05	1.5788	1.5715	1.8367	0.8771	yes	C00757	-	-	map00950;map01110;map01063;map04152	Isoquinoline alkaloid biosynthesis;Biosynthesis of secondary metabolites;Biosynthesis of alkaloids derived from shikimate pathway;AMPK signaling pathway	Metabolism;Metabolism;Metabolism;Environmental Information Processing	Biosynthesis of other secondary metabolites;Global and overview maps;Chemical structure transformation maps;Signal transduction	HMDB0003409;MJDBOTE0001023	Alkaloids and derivatives	Protoberberine alkaloids and derivatives	Not Available	2086-83-1	354.157	4.00333	M+NH4	C20H18NO4+	0	36	pos
pos_7516	N8-Acetylspermidine	metab_7177	2.53e-07	1.18e-06	1.5785	1.5787	1.683	0.751	yes	C01029	-	-	-	-	-	-	HMDB0002189	Organic acids and derivatives	Carboximidic acids and derivatives	Carboximidic acids	13431-24-8	188.176	0.875	M+H	C9H21N3O	73.2	0	pos
neg_4781	5-(6-Hydroxy-3,7-dimethyl-2,7-octadienyloxy)-7-methoxycoumarin	metab_11941	4.68e-07	2.62e-06	1.5783	1.5715	1.7249	0.7866	yes	-	-	-	-	-	-	-	HMDB0032955	Phenylpropanoids and polyketides	Coumarins and derivatives	Not Available	40520-59-0	381.113	5.97835	M+K-2H	C20H24O5	0	31.8	neg
pos_6283	N-Docosahexaenoyl Glutamic acid	metab_5821	5.02e-08	3.28e-07	1.5735	1.5726	0.6101	-0.7128	yes	-	-	-	-	-	-	-	HMDB0242013;LMFA08020089	Organic acids and derivatives	Carboxylic acids and derivatives	Amino acids, peptides, and analogues	-	502.251	3.75345	M+2Na-H	C27H39NO5	0	54.9	pos
neg_4836	(1alpha,4alpha,5beta,6alpha,11betaH)-1,4-Epoxy-5-hydroxy-10(14)-germacren-12,6-olide	metab_12002	7.74e-10	2.82e-08	1.5722	1.5711	1.9936	0.9954	yes	-	-	-	-	-	-	-	HMDB0037005	Organoheterocyclic compounds	Lactones	Gamma butyrolactones	-	265.144	5.94705	M-H	C15H22O4	0	66.7	neg
pos_3359	Isoachifolidiene	metab_2603	6.01e-09	7.2e-08	1.5722	1.5682	1.6951	0.7614	yes	-	-	-	-	-	-	-	HMDB0038690	Lipids and lipid-like molecules	Fatty Acyls	Fatty acid esters	-	383.127	5.98768	M+K	C20H24O5	0	60.7	pos
pos_2675	Tyrosine methylester	metab_1849	1.98e-08	1.65e-07	1.572	1.5768	0.5671	-0.8184	yes	C03404	-	-	-	-	-	-	HMDB0029217	Organic acids and derivatives	Carboxylic acids and derivatives	Amino acids, peptides, and analogues	1080-06-4	237.123	4.02797	M+ACN+H	C10H13NO3	0	43.2	pos
neg_5028	Glucosyl (E)-2,6-Dimethyl-2,5-heptadienoate	metab_12215	1.56e-05	4.37e-05	1.568	1.5769	0.5385	-0.893	yes	-	-	-	-	-	-	-	HMDB0035136	Organic oxygen compounds	Organooxygen compounds	Carbohydrates and carbohydrate conjugates	261949-43-3	361.151	5.79305	M+FA-H	C15H24O7	0	30.6	neg
pos_6510	Diphenoxylate	metab_7712	0.0003484	0.0006305	1.5679	1.5833	0.5594	-0.838	yes	C07871	-	-	-	-	-	-	PW_C009506;HMDB0251256;HMDB0015213	Benzenoids	Benzene and substituted derivatives	Diphenylacetonitriles	915-30-0	417.234	3.41607	M+H-2H2O	C30H32N2O2	0	31.7	pos
pos_419	LysoPA(a-13:0/0:0)	metab_3512	0.0002152	0.000409	1.5666	1.5772	0.5824	-0.78	yes	-	-	-	-	-	-	-	HMDB0114760	Lipids and lipid-like molecules	Glycerophospholipids	Glycerophosphates	-	407.159	2.70018	M+Na, M+K	C16H33O7P	0	35.4	pos
pos_3086	Marshrin	metab_2304	4.52e-07	1.91e-06	1.5662	1.5688	1.7995	0.8476	yes	-	-	-	-	-	-	-	HMDB0033783	Phenylpropanoids and polyketides	Coumarins and derivatives	Not Available	-	308.112	5.24977	M+NH4	C15H14O6	0	58.6	pos
neg_470	3-Dehydroteasterone	metab_11851	2.44e-07	1.57e-06	1.5658	1.5623	1.5257	0.6094	yes	C15792	-	-	map01100;map00905;map01110	Metabolic pathways;Brassinosteroid biosynthesis;Biosynthesis of secondary metabolites	Metabolism;Metabolism;Metabolism	Global and overview maps;Metabolism of terpenoids and polyketides;Global and overview maps	HMDB0041527;LMST01030131	Lipids and lipid-like molecules	Steroids and steroid derivatives	Bile acids, alcohols and derivatives	124853-28-7	445.332	6.67192	M-H, M+Na-2H	C28H46O4	0	72.5	neg
neg_5210	Arnamiol	metab_12418	2.55e-06	9.85e-06	1.5657	1.5605	1.673	0.7424	yes	-	-	-	-	-	-	-	HMDB0035062	Lipids and lipid-like molecules	Prenol lipids	Sesquiterpenoids	102092-23-9	487.131	5.50255	M+K-2H	C24H31ClO6	0	40.5	neg
neg_7048	D-Fucitol	metab_14451	1.51e-08	2.01e-07	1.5642	1.5651	0.6182	-0.6939	yes	-	-	-	-	-	-	-	HMDB0304954	Organic oxygen compounds	Organooxygen compounds	Carbohydrates and carbohydrate conjugates	-	391.184	3.24093	2M+Hac-H	C6H14O5	0	45.7	neg
neg_2152	Mucronine D	metab_9035	4.65e-06	1.59e-05	1.5641	1.5662	0.5678	-0.8165	yes	C10009	-	-	-	-	-	-	HMDB0029335	Organic acids and derivatives	Carboxylic acids and derivatives	Amino acids, peptides, and analogues	38496-00-3	698.337	4.26557	M+K-2H	C37H51N5O6	0	65	neg
neg_4577	Cholyltryptophan	metab_11715	5.25e-10	2.18e-08	1.5635	1.5652	0.6083	-0.7172	yes	-	-	-	-	-	-	-	HMDB0242374	Lipids and lipid-like molecules	Steroids and steroid derivatives	Bile acids, alcohols and derivatives	-	593.36	6.25042	M-H	C35H50N2O6	0	33.1	neg
neg_2477	Hexyl glucoside	metab_9392	0.004641	0.006634	1.5619	1.5654	2.6787	1.4215	yes	-	-	-	-	-	-	-	HMDB0031688	Lipids and lipid-like molecules	Fatty Acyls	Fatty acyl glycosides	59080-45-4	285.134	4.8801	M+Na-2H	C12H24O6	0	38.4	neg
neg_2526	(1S,2S,4R,8R)-p-Menthane-1,2,8,9-tetrol	metab_9447	3.54e-08	3.59e-07	1.5608	1.5567	1.7981	0.8465	yes	-	-	-	-	-	-	-	HMDB0039974	Lipids and lipid-like molecules	Prenol lipids	Monoterpenoids	402593-46-8	203.128	4.96698	M-H	C10H20O4	0	32.5	neg
neg_714	(1R*,3R*,3'S*)-1,2,3,4-Tetrahydro-1-(2-thio-3-pyrrolidinyl)-beta-carboline-3-carboxylic acid	metab_14552	0.008273	0.01128	1.5581	1.5802	0.4525	-1.1439	yes	-	-	-	-	-	-	-	HMDB0034767	Alkaloids and derivatives	Harmala alkaloids	Not Available	-	314.099	4.72313	M-H2O-H, M-H	C16H17N3O2S	0	32.9	neg
neg_637	Prostaglandin F-main urinary metabolite	metab_13699	7.97e-07	3.94e-06	1.5575	1.5514	1.7006	0.766	yes	-	-	-	-	-	-	-	HMDB0256371;HMDB0258925	Lipids and lipid-like molecules	Fatty Acyls	Eicosanoids	-	341.197	5.994	M-H2O-H, M-H	C18H30O6	0	47.6	neg
pos_5099	Momordicoside L	metab_4513	5.16e-09	6.59e-08	1.5561	1.5564	0.5254	-0.9284	yes	-	-	-	-	-	-	-	HMDB0035917	Lipids and lipid-like molecules	Steroids and steroid derivatives	Cucurbitacins	81348-83-6	679.383	5.97178	M+2Na-H	C36H58O9	0	71.8	pos
neg_6003	Lanopepden	metab_13296	1.19e-09	3.68e-08	1.5526	1.5542	0.6025	-0.7309	yes	-	-	-	-	-	-	-	HMDB0253975	Organoheterocyclic compounds	Diazinanes	Piperazines	-	500.236	4.32042	M+Na-2H	C22H34FN7O4	0	50.6	neg
pos_1391	3-methyl-2-Quinoxalinone	metab_435	6.57e-10	1.64e-08	1.5523	1.5534	1.6887	0.7559	yes	-	-	-	-	-	-	-	-	-	-	-	-	338.159	5.27377	M+H, 2M+NH4	C9H8N2O	59.6	0	pos
neg_476	N-Oleoyl Phenylalanine	metab_11917	0.0005864	0.001029	1.5518	1.5633	0.6158	-0.6995	yes	-	-	-	-	-	-	-	LMFA08020092;HMDB0062336	Organic acids and derivatives	Carboxylic acids and derivatives	Amino acids, peptides, and analogues	-	428.317	6.7266	M-H, 2M-H	C27H43NO3	85	0	neg
neg_3596	LysoPE(18:1(11Z)/0:0)	metab_10629	3.07e-08	3.29e-07	1.5515	1.5497	0.6441	-0.6347	yes	-	-	-	-	-	-	-	HMDB0011505	Lipids and lipid-like molecules	Glycerophospholipids	Glycerophosphoethanolamines	-	524.299	6.85155	M+FA-H	C23H46NO7P	0	86.8	neg
neg_1102	Valylaspartic acid	metab_7872	6.19e-06	2.03e-05	1.5508	1.5541	0.6215	-0.6861	yes	-	-	-	-	-	-	-	HMDB0029123	Organic acids and derivatives	Carboxylic acids and derivatives	Amino acids, peptides, and analogues	20556-16-5	231.098	1.22028	M-H	C9H16N2O5	0	42	neg
pos_6527	Austalide G	metab_6090	4.68e-08	3.1e-07	1.5501	1.5528	0.6239	-0.6806	yes	-	-	-	-	-	-	-	HMDB0030154	Organoheterocyclic compounds	Benzopyrans	1-benzopyrans	96817-09-3	551.282	3.38418	M+CH3OH+H	C28H38O9	0	34.5	pos
pos_6488	Bisoprolol	metab_6048	3.31e-06	1.06e-05	1.5473	1.5491	0.624	-0.6803	yes	C06852	-	-	-	-	-	-	PW_C009100;HMDB0014750;MJDBOTE0001331	Benzenoids	Benzene and substituted derivatives	Benzylethers	66722-44-9	389.239	3.44808	M+ACN+Na	C18H31NO4	0	36.6	pos
neg_3576	11,12-Epoxyeicosatrienoic acid	metab_10607	1.71e-08	2.17e-07	1.5461	1.5437	1.5534	0.6354	yes	C14770	-	-	map00590;map01100;map04913;map04270;map04726	Arachidonic acid metabolism;Metabolic pathways;Ovarian steroidogenesis;Vascular smooth muscle contraction;Serotonergic synapse	Metabolism;Metabolism;Organismal Systems;Organismal Systems;Organismal Systems	Lipid metabolism;Global and overview maps;Endocrine system;Circulatory system;Nervous system	PW_C002170;HMDB0004673;HMDB0244445;LMFA03090011	Lipids and lipid-like molecules	Fatty Acyls	Eicosanoids	123931-40-8;81276-02-0	365.236	6.81252	M+FA-H	C20H32O3	0	59.6	neg
pos_7380	Adenine	metab_7030	1.57e-06	5.51e-06	1.5446	1.5398	1.5142	0.5985	yes	C00147	Nucleic acids	Bases	map01100;map00230;map00908	Metabolic pathways;Purine metabolism;Zeatin biosynthesis	Metabolism;Metabolism;Metabolism	Global and overview maps;Nucleotide metabolism;Metabolism of terpenoids and polyketides	PW_C000024;HMDB0000034;MJDBOTE0000759	Organoheterocyclic compounds	Imidazopyrimidines	Purines and purine derivatives	73-24-5	136.062	1.29452	M+H	C5H5N5	67.1	0	pos
pos_274	MG(22:5(7Z,10Z,13Z,16Z,19Z)/0:0/0:0)	metab_1921	4.96e-07	2.07e-06	1.5446	1.541	1.5358	0.6189	yes	-	-	-	-	-	-	-	HMDB0011586	Lipids and lipid-like molecules	Glycerolipids	Monoradylglycerols	-	405.3	6.5361	M+NH4, M+Na, M+H	C25H40O4	0	47.2	pos
neg_4414	Secasterone	metab_11535	6.81e-07	3.49e-06	1.5445	1.5447	1.5851	0.6645	yes	-	-	-	-	-	-	-	HMDB0040999	Lipids and lipid-like molecules	Steroids and steroid derivatives	Ergostane steroids	164321-81-7	491.338	6.47633	M+FA-H	C28H46O4	0	53.7	neg
pos_5080	Corynanthine	metab_4493	3.55e-08	2.54e-07	1.5442	1.5488	1.7341	0.7942	yes	C09256	-	-	-	-	-	-	HMDB0250478;HMDB0015464	Lipids and lipid-like molecules	Steroids and steroid derivatives	Stigmastanes and derivatives	146-48-5	418.212	5.99563	M+ACN+Na	C21H26N2O3	0	52.8	pos
neg_7521	2-Amino-4-[carbamimidoyl(methyl)amino]butanoic acid	metab_14971	6.44e-06	2.09e-05	1.5424	1.5354	0.5989	-0.7396	yes	-	-	-	-	-	-	-	HMDB0255374	Organic acids and derivatives	Carboxylic acids and derivatives	Amino acids, peptides, and analogues	-	173.104	0.78925	M-H	C6H14N4O2	0	69.6	neg
pos_653	Phenylalanyl-Alanine	metab_6093	0.0002542	0.0004736	1.542	1.5343	1.9246	0.9446	yes	-	-	-	-	-	-	-	HMDB0028988;HMDB0304787	Organic acids and derivatives	Carboxylic acids and derivatives	Amino acids, peptides, and analogues	3918-87-4	269.149	4.15665	M+Na, M+CH3OH+H	C12H16N2O3	0	54.4	pos
pos_5383	PA(20:4(6E,8Z,11Z,14Z)-OH(5S)/8:0)	metab_4827	4.17e-05	9.5e-05	1.5407	1.5388	1.6429	0.7162	yes	-	-	-	-	-	-	-	HMDB0266594	Not Available	Not Available	Not Available	-	639.302	5.47447	M+K	C31H53O9P	0	63	pos
pos_1809	Pseudouridine	metab_897	5.89e-09	7.13e-08	1.5403	1.5442	0.6002	-0.7365	yes	C02067	-	-	map00240;map01100	Pyrimidine metabolism;Metabolic pathways	Metabolism;Metabolism	Nucleotide metabolism;Global and overview maps	HMDB0000767	Nucleosides, nucleotides, and analogues	Nucleoside and nucleotide analogues	Not Available	1445-07-4	262.103	0.945833	M+NH4	C9H12N2O6	0	55.3	pos
neg_7125	Dihydrojasmonic acid	metab_14536	4.79e-09	9.09e-08	1.5398	1.5406	0.5397	-0.8898	yes	-	-	-	-	-	-	-	HMDB0033601	Lipids and lipid-like molecules	Fatty Acyls	Lineolic acids and derivatives	98674-52-3	469.278	3.09145	2M+FA-H	C12H20O3	0	42.8	neg
neg_1986	Histidylmethionine	metab_8850	0.0003935	0.0007192	1.5373	1.5252	1.7386	0.7979	yes	-	-	-	-	-	-	-	HMDB0028891	Organic acids and derivatives	Carboxylic acids and derivatives	Amino acids, peptides, and analogues	2488-11-01	267.091	4.05267	M-H2O-H	C11H18N4O3S	0	30.5	neg
pos_5183	Sterculic acid	metab_4607	0.0002884	0.0005323	1.5373	1.5238	1.7798	0.8317	yes	C08366	-	-	map01060	Biosynthesis of plant secondary metabolites	Metabolism	Chemical structure transformation maps	HMDB0258495;LMFA01140018;HMDB0304490	Lipids and lipid-like molecules	Fatty Acyls	Fatty acids and conjugates	738-87-4	339.227	5.8918	M+2Na-H	C19H34O2	0	57	pos
pos_3987	E-10-Hydroxynortriptyline	metab_3288	3.5e-07	1.55e-06	1.5372	1.5333	0.6423	-0.6387	yes	-	-	-	-	-	-	-	HMDB0013889	Benzenoids	Dibenzocycloheptenes	Not Available	-	597.287	7.81532	2M+K	C19H21NO	0	61.7	pos
neg_4708	MG(20:5(5Z,8Z,11Z,14Z,17Z)/0:0/0:0)	metab_11860	3.29e-08	3.46e-07	1.536	1.5358	1.5406	0.6235	yes	-	-	-	-	-	-	-	HMDB0011580	Lipids and lipid-like molecules	Glycerolipids	Monoradylglycerols	-	421.26	6.04828	M+FA-H	C23H36O4	0	44.5	neg
pos_864	3-Oxocholic acid	metab_7544	2.54e-10	9.05e-09	1.5358	1.5367	1.4162	0.502	yes	-	-	-	-	-	-	-	LMST04010443;HMDB0000502	Lipids and lipid-like molecules	Steroids and steroid derivatives	Bile acids, alcohols and derivatives	2304-89-4	424.305	6.1152	M+NH4, M+Na	C24H38O5	0	67.2	pos
neg_5422	10-Hydroxydecanoic acid	metab_12652	0.0005086	0.0009085	1.5353	1.5206	1.8698	0.9029	yes	C02774	-	-	-	-	-	-	HMDB0244272	Organic acids and derivatives	Hydroxy acids and derivatives	Medium-chain hydroxy acids and derivatives	1679-53-4	233.139	5.1912	M+FA-H	C10H20O3	0	57.6	neg
neg_1470	Methyl 4-amino-5-ethyl-3-thiophenecarboxylate	metab_8279	4.6e-09	8.91e-08	1.5351	1.5319	1.7737	0.8267	yes	-	-	-	-	-	-	-	HMDB0247491	Organoheterocyclic compounds	Thiophenes	Thiophene carboxylic acids and derivatives	-	184.043	3.3988	M-H	C8H11NO2S	0	32.7	neg
pos_6774	Lenticin	metab_6362	0.0002926	0.0005391	1.5351	1.5286	1.6867	0.7542	yes	C09213	-	-	-	-	-	-	HMDB0061115	Organic acids and derivatives	Carboxylic acids and derivatives	Amino acids, peptides, and analogues	487-58-1	493.281	3.04903	2M+H	C14H18N2O2	0	32.5	pos
pos_5896	2-alpha-Ethoxydihydrophytuberin	metab_5390	2.7e-08	2.07e-07	1.5328	1.531	1.6874	0.7548	yes	-	-	-	-	-	-	-	HMDB0302961	Lipids and lipid-like molecules	Prenol lipids	Sesquiterpenoids	-	358.258	4.43052	M+NH4	C19H32O5	0	39.4	pos
neg_7068	Pentanoic acid, 5-(dipentylamino)-5-oxo-4-((3-quinolinylcarbonyl)amino)-, (R)-	metab_14473	6.23e-09	1.09e-07	1.5328	1.5336	0.5707	-0.8092	yes	-	-	-	-	-	-	-	HMDB0247713	Organic acids and derivatives	Carboxylic acids and derivatives	Amino acids, peptides, and analogues	-	478.216	3.22528	M+K-2H	C25H35N3O4	0	59.5	neg
neg_2981	Combretastatin A4	metab_9949	0.0002969	0.0005585	1.5326	1.5284	1.9366	0.9535	yes	C20268	-	-	-	-	-	-	HMDB0250413;HMDB0253622	Phenylpropanoids and polyketides	Stilbenes	Not Available	117048-59-6	315.124	5.7857	M-H	C18H20O5	0	38.6	neg
neg_1301	3'-Deoxythymidine	metab_8092	3.95e-09	8.17e-08	1.5319	1.5286	1.8464	0.8847	yes	-	-	-	-	-	-	-	HMDB0246094	Nucleosides, nucleotides, and analogues	Pyrimidine nucleosides	Pyrimidine 2'',3''-dideoxyribonucleosides	-	207.077	3.20965	M-H2O-H	C10H14N2O4	0	45.6	neg
pos_5276	Cholylglutamic acid	metab_4709	2.33e-05	5.68e-05	1.5318	1.5387	0.567	-0.8186	yes	-	-	-	-	-	-	-	HMDB0242384	Not Available	Not Available	Not Available	-	502.316	5.73148	M+H-2H2O	C29H47NO8	0	70.8	pos
neg_1106	D-Ribulose	metab_7876	1.83e-09	5.03e-08	1.5308	1.532	0.6018	-0.7326	yes	C00309	Carbohydrates	Monosaccharides	map01100;map00040	Metabolic pathways;Pentose and glucuronate interconversions	Metabolism;Metabolism	Global and overview maps;Carbohydrate metabolism	HMDB0000621	Organic oxygen compounds	Organooxygen compounds	Carbohydrates and carbohydrate conjugates	131064-70-5;488-84-6	449.152	1.23593	3M-H	C5H10O5	0	38.8	neg
neg_1934	Cucurbitacin I	metab_8793	2.25e-09	5.52e-08	1.5304	1.5329	0.5738	-0.8013	yes	C08800	-	-	-	-	-	-	HMDB0250582;LMST01010110	Lipids and lipid-like molecules	Steroids and steroid derivatives	Cucurbitacins	2222-07-03	549.267	3.9737	M+Cl	C30H42O7	0	73.8	neg
pos_2737	2-Chlorobenzoic acid	metab_1918	1.23e-11	1.29e-09	1.53	1.532	0.5605	-0.8352	yes	C02357	-	-	map01220;map01120;map00364	Degradation of aromatic compounds;Microbial metabolism in diverse environments;Fluorobenzoate degradation	Metabolism;Metabolism;Metabolism	Global and overview maps;Global and overview maps;Xenobiotics biodegradation and metabolism	HMDB0245065	Benzenoids	Benzene and substituted derivatives	Benzoic acids and derivatives	118-91-2	189.033	4.20532	M+CH3OH+H	C7H5ClO2	0	34	pos
neg_2971	(3S,5S)-3,5-Diaminohexanoate	metab_9939	8.16e-06	2.53e-05	1.5288	1.5213	1.8891	0.9177	yes	C01186	-	-	map01100;map00310	Metabolic pathways;Lysine degradation	Metabolism;Metabolism	Global and overview maps;Amino acid metabolism	HMDB0012115	Organic acids and derivatives	Carboxylic acids and derivatives	Amino acids, peptides, and analogues	17027-83-7	337.212	5.75437	2M+FA-H	C6H14N2O2	0	53.5	neg
neg_5649	(24E)-3alpha-Acetoxy-15alpha-hydroxy-23-oxo-7,9(11),24-lanostatrien-26-oic acid	metab_12902	1.94e-09	5.17e-08	1.5287	1.5301	0.4788	-1.0625	yes	-	-	-	-	-	-	-	HMDB0035386	Lipids and lipid-like molecules	Prenol lipids	Diterpenoids	117383-37-6	547.3	4.84137	M+Na-2H	C32H46O6	0	44.3	neg
neg_5278	Gein	metab_12492	8.66e-10	2.95e-08	1.5285	1.5304	0.5883	-0.7654	yes	C17058	Steroids	24-Carbon atoms	-	-	-	-	HMDB0029909	Organic oxygen compounds	Organooxygen compounds	Carbohydrates and carbohydrate conjugates	585-90-0	493.146	5.39572	M+Cl	C21H30O11	0	37.8	neg
pos_3114	Fexofenadine	metab_2336	4.56e-07	1.92e-06	1.5284	1.5362	1.7345	0.7946	yes	C06999	-	-	map04976	Bile secretion	Organismal Systems	Digestive system	HMDB0005030;PW_C002373	Benzenoids	Benzene and substituted derivatives	Diphenylmethanes	83799-24-0	484.28	5.32178	M+H-H2O	C32H39NO4	0	45.7	pos
pos_6229	N-(3-methoxyphenyl)-2-(3-propan-2-yl-1,2-oxazol-5-yl)pyrrolidine-1-carboxamide	metab_5761	4.34e-07	1.84e-06	1.5273	1.5243	1.8492	0.8869	yes	-	-	-	-	-	-	-	-	-	-	-	-	330.184	3.84197	M+H	C18H23N3O3	52.9	0	pos
pos_5677	5,7-Megastigmadien-9-ol glucoside	metab_5148	5.46e-09	6.8e-08	1.5269	1.5241	1.7707	0.8243	yes	-	-	-	-	-	-	-	HMDB0041044	Lipids and lipid-like molecules	Fatty Acyls	Fatty acyl glycosides	146610-77-7	374.253	4.88107	M+NH4	C19H32O6	0	52.3	pos
neg_6283	Orotidine	metab_13603	8.02e-05	0.0001757	1.5255	1.528	1.7829	0.8342	yes	C01103	-	-	map00240;map01100;map01240	Pyrimidine metabolism;Metabolic pathways;Biosynthesis of cofactors	Metabolism;Metabolism;Metabolism	Nucleotide metabolism;Global and overview maps;Global and overview maps	HMDB0000788	Nucleosides, nucleotides, and analogues	Pyrimidine nucleosides	Not Available	314-50-1	325.007	3.98935	M+K-2H	C10H12N2O8	0	55.5	neg
neg_6262	Deoxyloganin	metab_13580	0.0004931	0.0008832	1.5248	1.5371	0.5119	-0.9662	yes	C06071	-	-	map01100;map01110;map00902;map01062	Metabolic pathways;Biosynthesis of secondary metabolites;Monoterpenoid biosynthesis;Biosynthesis of terpenoids and steroids	Metabolism;Metabolism;Metabolism;Metabolism	Global and overview maps;Global and overview maps;Metabolism of terpenoids and polyketides;Chemical structure transformation maps	LMPR0102070005;HMDB0251007	Lipids and lipid-like molecules	Prenol lipids	Terpene glycosides	26660-57-1	419.158	4.01348	M+FA-H	C17H26O9	0	52.7	neg
pos_758	3'-DEOXY-3'-FLUOROTHYMIDINE	metab_7247	2.36e-07	1.11e-06	1.5242	1.5235	0.5914	-0.7579	yes	-	-	-	-	-	-	-	HMDB0246092	Nucleosides, nucleotides, and analogues	Pyrimidine nucleosides	Pyrimidine 2'',3''-dideoxyribonucleosides	-	277.118	5.23377	M+H, M+CH3OH+H	C10H13FN2O4	0	45.7	pos
neg_2633	Leu Glu Lys Glu	metab_9566	3.98e-09	8.17e-08	1.5235	1.5244	0.5007	-0.9979	yes	-	-	-	-	-	-	-	-	-	-	-	-	516.267	5.14658	M-H	C22H39N5O9	31.5	0	neg
neg_1258	Fumagillin	metab_8043	0.0001763	0.00035	1.5234	1.5284	1.7172	0.78	yes	C09668	-	-	-	-	-	-	LMPR0103060003;HMDB0242599;MJDBOTE0001216	Lipids and lipid-like molecules	Fatty Acyls	Fatty acids and conjugates	23110-15-8	495.183	3.02088	M+K-2H	C26H34O7	0	35.3	neg
neg_4430	LysoPE(20:4(5Z,8Z,11Z,14Z)/0:0)	metab_11553	7.71e-07	3.87e-06	1.5233	1.5237	0.6662	-0.5859	yes	-	-	-	-	-	-	-	HMDB0011517	Lipids and lipid-like molecules	Glycerophospholipids	Glycerophosphoethanolamines	652149-09-2	500.278	6.45287	M-H	C25H44NO7P	0	70.9	neg
pos_1625	Imidazoleacetic acid riboside	metab_695	0.0001766	0.000342	1.5217	1.5291	0.6421	-0.6392	yes	C05131	-	-	map00340	Histidine metabolism	Metabolism	Amino acid metabolism	HMDB0002331	Nucleosides, nucleotides, and analogues	Imidazole ribonucleosides and ribonucleotides	Not Available	29605-99-0	276.119	0.961483	M+H, M+NH4	C10H14N2O6	0	62.1	pos
neg_1647	Glycylprolylhydroxyproline	metab_8474	1.27e-08	1.8e-07	1.5215	1.5248	0.6118	-0.7088	yes	-	-	-	-	-	-	-	HMDB0002171	Organic acids and derivatives	Carboxylic acids and derivatives	Amino acids, peptides, and analogues	2239-67-0	615.263	3.5958	2M+FA-H	C12H19N3O5	0	81.4	neg
neg_967	Histidylserine	metab_15324	7.97e-10	2.82e-08	1.5212	1.5229	0.5847	-0.7743	yes	-	-	-	-	-	-	-	HMDB0028894	Organic acids and derivatives	Carboxylic acids and derivatives	Amino acids, peptides, and analogues	21438-60-8	241.092	0.781417	M-H	C9H14N4O4	37	0	neg
pos_5341	P-Menthane-3,8-diol	metab_4781	0.04126	0.04981	1.5208	1.5048	35.2265	5.1386	yes	C02904	-	-	-	-	-	-	LMPR0102090063;HMDB0035595;HMDB0036145	Lipids and lipid-like molecules	Prenol lipids	Monoterpenoids	42822-86-6;91739-72-9;565-50-4	383.254	5.57107	2M+K	C10H20O2	0	45.4	pos
pos_4450	3-(5-Methoxy-4-oxocyclohex-2-en-1-yl)prop-2-enoic acid	metab_3801	4.27e-11	2.85e-09	1.5207	1.5205	1.6409	0.7145	yes	-	-	-	-	-	-	-	HMDB0255409	Organic oxygen compounds	Organooxygen compounds	Carbonyl compounds	-	179.07	6.72673	M+H-H2O	C10H12O4	0	33.9	pos
pos_1909	Val Glu Gln	metab_1006	2.61e-10	9.22e-09	1.5187	1.5203	0.6617	-0.5957	yes	-	-	-	-	-	-	-	-	-	-	-	-	375.187	1.72557	M+H	C15H26N4O7	65.3	0	pos
pos_5731	L-Hypoglycin A	metab_5209	1.95e-07	9.55e-07	1.5184	1.5169	1.6875	0.7549	yes	C08287	-	-	-	-	-	-	HMDB0029427	Organic acids and derivatives	Carboxylic acids and derivatives	Amino acids, peptides, and analogues	156-56-9	305.149	4.77707	2M+Na	C7H11NO2	0	47.5	pos
pos_6172	(3S,5R,6S,7E,9x)-7-Megastigmene-3,6,9-triol 9-glucoside	metab_5698	3.3e-06	1.05e-05	1.5168	1.5258	0.6056	-0.7235	yes	-	-	-	-	-	-	-	LMFA13010057;HMDB0041176	Lipids and lipid-like molecules	Fatty Acyls	Fatty acyl glycosides	-	423.26	3.9473	M+CH3OH+H	C19H34O8	0	46.2	pos
pos_1492	Estriol-17-glucuronide	metab_547	1.92e-10	7.77e-09	1.5139	1.5149	0.619	-0.692	yes	C11346	-	-	-	-	-	-	HMDB0010333	Lipids and lipid-like molecules	Steroids and steroid derivatives	Steroidal glycosides	7219-89-8	482.235	3.14508	M+H, M+NH4	C24H32O9	0	51.1	pos
pos_5287	6'-Hydroxybuspirone	metab_4721	6.37e-06	1.85e-05	1.5136	1.5077	1.6884	0.7557	yes	-	-	-	-	-	-	-	HMDB0061110	Organoheterocyclic compounds	Diazinanes	Piperazines	-	443.275	5.70748	M+ACN+H	C21H31N5O3	0	55.2	pos
pos_5716	(+/-)-11,12-Dihydroxy-5Z,8Z,14Z,17Z-eicosatetraenoic acid	metab_5192	1.02e-06	3.8e-06	1.5134	1.5103	1.6225	0.6982	yes	C14774	-	-	map00590;map01100;map04726	Arachidonic acid metabolism;Metabolic pathways;Serotonergic synapse	Metabolism;Metabolism;Organismal Systems	Lipid metabolism;Global and overview maps;Nervous system	LMFA03060079;HMDB0002314;HMDB0242269	Lipids and lipid-like molecules	Fatty Acyls	Eicosanoids	192461-95-3	400.249	4.81707	M+ACN+Na	C20H32O4	0	70.8	pos
pos_3344	Abscisic acid	metab_2587	2.15e-05	5.3e-05	1.5132	1.5046	1.6913	0.7581	yes	C06082	-	-	map01100;map01110;map00906;map01070;map01062;map04075;map01060	Metabolic pathways;Biosynthesis of secondary metabolites;Carotenoid biosynthesis;Biosynthesis of plant hormones;Biosynthesis of terpenoids and steroids;Plant hormone signal transduction;Biosynthesis of plant secondary metabolites	Metabolism;Metabolism;Metabolism;Metabolism;Metabolism;Environmental Information Processing;Metabolism	Global and overview maps;Global and overview maps;Metabolism of terpenoids and polyketides;Chemical structure transformation maps;Chemical structure transformation maps;Signal transduction;Chemical structure transformation maps	HMDB0036093;HMDB0243505;HMDB0035140	Lipids and lipid-like molecules	Prenol lipids	Sesquiterpenoids	7773-56-0;21293-29-8	297.168	5.9558	M+CH3OH+H	C15H20O4	0	43.7	pos
pos_6406	Hernandulcin	metab_5958	1.17e-05	3.14e-05	1.512	1.5158	1.8698	0.9028	yes	C09681	-	-	-	-	-	-	HMDB0037906	Lipids and lipid-like molecules	Prenol lipids	Sesquiterpenoids	95602-94-1	259.165	3.5766	M+Na	C15H24O2	0	32.8	pos
pos_521	O-Desmethyltramadol glucuronide	metab_4636	4.22e-05	9.61e-05	1.5113	1.5191	0.5989	-0.7395	yes	-	-	-	-	-	-	-	HMDB0060856;PW_C040591	Organic oxygen compounds	Organooxygen compounds	Carbohydrates and carbohydrate conjugates	138921-77-4	408.198	3.23338	M+H-H2O, M+CH3OH+H	C21H31NO8	0	43.5	pos
neg_748	M2 di-hydroxylated metabolite	metab_14924	7.94e-10	2.82e-08	1.5109	1.5126	0.6029	-0.7299	yes	-	-	-	-	-	-	-	HMDB0061046	Organoheterocyclic compounds	Indoles and derivatives	N-alkylindoles	-	460.184	4.01348	M-H2O-H, M+Cl	C24H28FN3O3	0	47.6	neg
neg_5055	4-Phenylpiperidine-4-carboxylic acid	metab_12245	1.11e-10	8.91e-09	1.5107	1.5113	1.8292	0.8712	yes	-	-	-	-	-	-	-	HMDB0246199	Organoheterocyclic compounds	Piperidines	Phenylpiperidines	-	455.218	5.73968	2M+FA-H	C12H15NO2	0	53.7	neg
neg_4306	3beta,7alpha-Dihydroxy-5-cholestenoate	metab_11415	1.23e-07	9.32e-07	1.5105	1.5068	1.4765	0.5622	yes	C17335	-	-	map00120	Primary bile acid biosynthesis	Metabolism	Lipid metabolism	HMDB0012454;PW_C007981	Lipids and lipid-like molecules	Steroids and steroid derivatives	Bile acids, alcohols and derivatives	115538-84-6	431.316	6.61715	M-H	C27H44O4	0	66	neg
neg_7374	Glutamylglutamic acid	metab_14808	2.69e-08	2.97e-07	1.5103	1.5135	0.6082	-0.7173	yes	C01425	-	-	-	-	-	-	HMDB0028818	Organic acids and derivatives	Carboxylic acids and derivatives	Amino acids, peptides, and analogues	3929-61-1	275.089	0.969533	M-H	C10H16N2O7	0	43.1	neg
pos_6083	Ametryn	metab_5599	1.87e-07	9.23e-07	1.5101	1.5084	0.6271	-0.6732	yes	C18700	-	-	-	-	-	-	HMDB0248288	Organoheterocyclic compounds	Triazines	1,3,5-triazines	834-12-8	472.277	4.07595	2M+NH4	C9H17N5S	0	40.8	pos
pos_1934	Ile Asp Asn	metab_1034	1.79e-10	7.6e-09	1.5091	1.5104	0.6282	-0.6706	yes	-	-	-	-	-	-	-	-	-	-	-	-	361.172	1.78157	M+H	C14H24N4O7	54.3	0	pos
neg_4325	Sphingosine 1-phosphate (d16:1-P)	metab_11436	0.0001098	0.0002307	1.509	1.4967	1.6454	0.7185	yes	-	-	-	-	-	-	-	HMDB0060061	Organic acids and derivatives	Organic phosphoric acids and derivatives	Phosphate esters	-	701.43	6.58587	2M-H	C16H34NO5P	0	58.4	neg
neg_6782	Histidylvaline	metab_14155	0.0001457	0.0002962	1.509	1.494	1.8192	0.8633	yes	-	-	-	-	-	-	-	HMDB0028898	Organic acids and derivatives	Carboxylic acids and derivatives	Amino acids, peptides, and analogues	76019-15-3	275.114	3.46995	M+Na-2H	C11H18N4O3	0	55.7	neg
neg_6990	Glycyl-D-proline	metab_14386	2.76e-06	1.05e-05	1.5075	1.5093	0.6149	-0.7016	yes	-	-	-	-	-	-	-	HMDB0252876	Organic acids and derivatives	Carboxylic acids and derivatives	Amino acids, peptides, and analogues	-	389.168	3.2807	2M+FA-H	C7H12N2O3	0	44.3	neg
neg_6045	Isoferulic acid 3-sulfate	metab_13342	6.54e-09	1.13e-07	1.5074	1.5084	0.6258	-0.6762	yes	-	-	-	-	-	-	-	HMDB0041748	Phenylpropanoids and polyketides	Cinnamic acids and derivatives	Hydroxycinnamic acids and derivatives	-	273.008	4.25702	M-H	C10H10O7S	0	43.4	neg
pos_3024	Ethosuximide	metab_2236	1.31e-09	2.55e-08	1.5073	1.5041	1.7456	0.8037	yes	C07505	-	-	-	-	-	-	HMDB0014731	Organoheterocyclic compounds	Pyrrolidines	Pyrrolidones	77-67-8	305.149	5.04975	2M+Na	C7H11NO2	0	32.3	pos
pos_5524	(2-Mercaptomethyl-3-phenyl-propionyl)-glycine	metab_4981	4.37e-10	1.26e-08	1.507	1.5091	0.5597	-0.8372	yes	C01619	-	-	-	-	-	-	HMDB0242473	Organic acids and derivatives	Carboxylic acids and derivatives	Amino acids, peptides, and analogues	-	295.111	5.20177	M+ACN+H	C12H15NO3S	0	35	pos
neg_871	Morinamide	metab_15218	4.7e-09	8.98e-08	1.507	1.5043	1.7242	0.786	yes	-	-	-	-	-	-	-	HMDB0254885	Organoheterocyclic compounds	Diazines	Pyrazines	-	243.087	3.47777	M-H2O-H, M+Na-2H	C10H14N4O2	0	32.2	neg
pos_4478	LysoPE(20:3(11Z,14Z,17Z)/0:0)	metab_3831	0.002038	0.003105	1.5063	1.4917	0.6072	-0.7198	yes	-	-	-	-	-	-	-	HMDB0011514	Lipids and lipid-like molecules	Glycerophospholipids	Glycerophosphoethanolamines	-	504.308	6.67112	M+H	C25H46NO7P	0	34.2	pos
pos_6529	3-Hydroxynona-5,7-dienoylcarnitine	metab_6092	1.74e-05	4.43e-05	1.505	1.4995	1.7494	0.8069	yes	-	-	-	-	-	-	-	HMDB0241770	Lipids and lipid-like molecules	Fatty Acyls	Fatty acid esters	-	331.222	3.38418	M+NH4	C16H27NO5	0	54.1	pos
pos_392	Arabinofuranosylthymine	metab_3215	1.7e-07	8.62e-07	1.5048	1.5081	0.67	-0.5778	yes	-	-	-	-	-	-	-	HMDB0248554	Nucleosides, nucleotides, and analogues	Pyrimidine nucleosides	Not Available	-	259.092	2.33327	M+H-H2O, M+H	C10H14N2O6	0	63.5	pos
pos_3389	[6]-Gingerdiol 3-acetate	metab_2636	0.0006474	0.001091	1.5033	1.5074	1.6594	0.7307	yes	-	-	-	-	-	-	-	HMDB0040566	Lipids and lipid-like molecules	Fatty Acyls	Fatty alcohol esters	143519-17-9	356.243	6.04348	M+NH4	C19H30O5	0	67.7	pos
neg_2581	Cyclosquamosin B	metab_9508	2.91e-09	6.69e-08	1.5033	1.5047	0.651	-0.6192	yes	-	-	-	-	-	-	-	HMDB0303368	Organic acids and derivatives	Carboxylic acids and derivatives	Amino acids, peptides, and analogues	-	872.428	5.06263	M+Na-2H	C39H65N9O10S	0	73.2	neg
pos_7499	Beta-Alanyl-L-arginine	metab_7157	5.88e-09	7.13e-08	1.5019	1.5021	0.6423	-0.6387	yes	C05340	-	-	map01100;map00410	Metabolic pathways;beta-Alanine metabolism	Metabolism;Metabolism	Global and overview maps;Metabolism of other amino acids	HMDB0060441	Organic acids and derivatives	Peptidomimetics	Hybrid peptides	-	246.156	0.898817	M+H	C9H19N5O3	0	31.8	pos
neg_5984	Cytidine, 2'-deoxy-2',2'-difluoro-N-(1-oxo-2-propylpentyl)-	metab_13273	0.01085	0.0145	1.5009	1.5229	0.4595	-1.1218	yes	-	-	-	-	-	-	-	HMDB0254250	Organoheterocyclic compounds	Diazines	Pyrimidines and pyrimidine derivatives	-	388.173	4.35173	M-H	C17H25F2N3O5	0	44.7	neg
neg_1889	2-[(E)-2-(3-Nitrophenyl)vinyl]quinoline	metab_8742	4.14e-08	4.1e-07	1.5006	1.4988	1.6896	0.7567	yes	-	-	-	-	-	-	-	HMDB0244962	Organoheterocyclic compounds	Quinolines and derivatives	Not Available	-	297.066	3.91105	M+Na-2H	C17H12N2O2	0	30.1	neg
pos_3205	Kynurenic Acid	metab_2436	2.58e-06	8.48e-06	1.5005	1.4943	1.8146	0.8597	yes	C01717	-	-	map01100;map00380	Metabolic pathways;Tryptophan metabolism	Metabolism;Metabolism	Global and overview maps;Amino acid metabolism	PW_C000566;HMDB0000715;MJDBOTE0000367	Organoheterocyclic compounds	Quinolines and derivatives	Quinoline carboxylic acids	492-27-3	190.05	5.6116	M+H	C10H7NO3	92.7	0	pos
neg_5808	(E)-2-Methyl-2-buten-1-ol O-beta-D-Glucopyranoside	metab_13079	7.51e-08	6.37e-07	1.4999	1.5009	0.5112	-0.968	yes	-	-	-	-	-	-	-	HMDB0033064	Lipids and lipid-like molecules	Fatty Acyls	Fatty acyl glycosides	-	293.124	4.59687	M+FA-H	C11H20O6	0	45.3	neg
pos_2193	Fenvalerate	metab_1319	7.95e-07	3.08e-06	1.4995	1.4977	0.6661	-0.5862	yes	C10988	-	-	-	-	-	-	HMDB0031791	Lipids and lipid-like molecules	Fatty Acyls	Fatty acid esters	51630-58-1	384.115	2.9455	M+H-2H2O	C25H22ClNO3	0	57.2	pos
pos_6128	(2-Pyridin-3-ylpyrrolidin-1-yl)methanol	metab_5649	5.58e-08	3.54e-07	1.499	1.4978	1.6688	0.7388	yes	-	-	-	-	-	-	-	HMDB0242480	Organoheterocyclic compounds	Pyridines and derivatives	Pyrrolidinylpyridines	-	374.253	4.00333	2M+NH4	C10H14N2O	0	33.9	pos
pos_7162	Laninamivir	metab_6793	1.14e-07	6.27e-07	1.4975	1.5037	0.6256	-0.6766	yes	C21557	-	-	-	-	-	-	HMDB0253972	Organic acids and derivatives	Carboxylic acids and derivatives	Carboxylic acid derivatives	203120-17-6	388.182	2.57222	M+ACN+H	C13H22N4O7	0	40.5	pos
neg_5415	5,8-Dihydroxy-3-(4-hydroxybenzyl)-7-methoxy-4-chromanone 8-acetate	metab_12644	1.27e-10	9.46e-09	1.497	1.4965	1.7438	0.8022	yes	-	-	-	-	-	-	-	HMDB0037252	Phenylpropanoids and polyketides	Homoisoflavonoids	Homoisoflavans	99877-75-5	339.088	5.20687	M-H2O-H	C19H18O7	0	51.6	neg
neg_3425	PE(15:0/0:0)	metab_10441	1.06e-06	4.95e-06	1.4967	1.5005	1.4951	0.5802	yes	-	-	-	-	-	-	-	LMGP02050031	-	-	-	-	438.262	6.48417	M-H	C20H42NO7P	75.2	0	neg
pos_6662	Gentamicin C	metab_6239	9.14e-08	5.19e-07	1.4963	1.4974	0.6272	-0.6729	yes	C01918	Antibiotics	Aminoglycosides	-	-	-	-	HMDB0252688	Organic oxygen compounds	Organooxygen compounds	Carbohydrates and carbohydrate conjugates	11097-82-8	472.276	3.19342	M+Na	C19H39N5O7	0	76.5	pos
neg_4868	15-Keto-prostaglandin F2a	metab_12037	1.13e-07	8.77e-07	1.4949	1.4948	1.6988	0.7645	yes	C05960	-	-	map00590	Arachidonic acid metabolism	Metabolism	Lipid metabolism	HMDB0004240	Lipids and lipid-like molecules	Fatty Acyls	Eicosanoids	35850-13-6	397.223	5.92348	M+FA-H	C20H32O5	0	40.5	neg
pos_5129	Cytosine deoxyribonucleoside	metab_4547	0.001719	0.002653	1.4938	1.485	0.5738	-0.8014	yes	C00881	Nucleic acids	Nucleosides	map00240;map01100;map02010	Pyrimidine metabolism;Metabolic pathways;ABC transporters	Metabolism;Metabolism;Environmental Information Processing	Nucleotide metabolism;Global and overview maps;Membrane transport	HMDB0250725;HMDB0000014	Nucleosides, nucleotides, and analogues	Pyrimidine nucleosides	Pyrimidine 2''-deoxyribonucleosides	951-77-9	472.218	5.94782	2M+NH4	C9H13N3O4	0	35.7	pos
neg_6825	Difenoxin	metab_14203	4.16e-07	2.39e-06	1.4931	1.4951	0.6131	-0.7059	yes	C07871	-	-	-	-	-	-	HMDB0251256	Benzenoids	Benzene and substituted derivatives	Diphenylacetonitriles	28782-42-5	445.194	3.42228	M+Na-2H	C28H28N2O2	0	49.1	neg
neg_5454	(-)-Fumigaclavine B	metab_12687	3.02e-08	3.25e-07	1.4913	1.4881	1.5777	0.6578	yes	-	-	-	-	-	-	-	HMDB0030201	Organic acids and derivatives	Carboxylic acids and derivatives	Amino acids, peptides, and analogues	6879-93-2	293.107	5.14658	M+K-2H	C16H20N2O	0	37.6	neg
neg_358	(x)-2-Heptanol glucoside	metab_10611	1.75e-05	4.82e-05	1.4908	1.4812	1.6935	0.76	yes	-	-	-	-	-	-	-	HMDB0035028	Lipids and lipid-like molecules	Fatty Acyls	Fatty acyl glycosides	-	299.15	5.57748	M-H2O-H, M+Na-2H	C13H26O6	0	31.7	neg
pos_1128	3-Hydroxytetradecanoyl carnitine	metab_144	5.67e-07	2.32e-06	1.4905	1.4981	1.5552	0.6371	yes	-	-	-	-	-	-	-	HMDB0061640	Lipids and lipid-like molecules	Fatty Acyls	Fatty acid esters	282523-64-2	426.261	6.5759	M+H-2H2O, M+K	C21H41NO5	0	45.3	pos
neg_4034	1-Stearoylglycerophosphoserine	metab_11114	1.29e-06	5.78e-06	1.4897	1.4842	0.5838	-0.7764	yes	-	-	-	-	-	-	-	HMDB0061698	Lipids and lipid-like molecules	Glycerophospholipids	Glycerophosphoserines	-	546.282	7.52318	M+Na-2H	C24H48NO9P	0	78.9	neg
neg_1381	{4-[4-(6-Carbamoyl-3,5-dimethylpyrazin-2-yl)phenyl]cyclohexyl}acetic acid	metab_8180	1.71e-09	4.82e-08	1.4895	1.491	0.6032	-0.7294	yes	-	-	-	-	-	-	-	HMDB0248788	Organoheterocyclic compounds	Diazines	Pyrazines	-	402.163	3.29633	M+Cl	C21H25N3O3	0	51.7	neg
pos_1323	Stallimycin	metab_360	9.41e-07	3.56e-06	1.4895	1.4928	1.5279	0.6116	yes	-	-	-	-	-	-	-	HMDB0251483	Organic nitrogen compounds	Organonitrogen compounds	N-arylamides	-	482.228	6.06733	M+H-H2O, M+H	C22H27N9O4	0	56.5	pos
pos_1613	Glutaminylglycine	metab_682	4.24e-09	5.83e-08	1.4888	1.4927	0.6507	-0.6199	yes	-	-	-	-	-	-	-	HMDB0028797	Organic acids and derivatives	Carboxylic acids and derivatives	Amino acids, peptides, and analogues	2650-65-9	226.08	0.9301	M+Na, M+K	C7H13N3O4	0	48	pos
pos_3090	Lucidenic acid J	metab_2309	1.36e-07	7.2e-07	1.4887	1.487	0.6419	-0.6395	yes	-	-	-	-	-	-	-	HMDB0035700	Lipids and lipid-like molecules	Prenol lipids	Triterpenoids	-	532.294	5.24977	M+ACN+H	C27H38O8	0	48.8	pos
pos_2074	PA(16:1(9Z)/5-iso PGF2VI)	metab_1189	1.83e-07	9.11e-07	1.4865	1.4866	0.5609	-0.8341	yes	-	-	-	-	-	-	-	HMDB0263414	Not Available	Not Available	Not Available	-	381.2	2.72415	M+2Na	C37H65O11P	0	46.9	pos
pos_6910	Isopropyl apiosylglucoside	metab_6513	1.31e-08	1.23e-07	1.4854	1.4897	0.6407	-0.6423	yes	-	-	-	-	-	-	-	HMDB0041513	Organic oxygen compounds	Organooxygen compounds	Carbohydrates and carbohydrate conjugates	147742-24-3	387.187	2.87382	M+CH3OH+H	C14H26O10	0	31.4	pos
neg_5185	Tetradecanedioic acid	metab_12389	6.76e-06	2.17e-05	1.4844	1.4793	1.6378	0.7118	yes	C11002	-	-	-	-	-	-	HMDB0000872;LMFA01170018	Lipids and lipid-like molecules	Fatty Acyls	Fatty acids and conjugates	821-38-5	303.181	5.5417	M+FA-H	C14H26O4	0	46.8	neg
neg_2107	Beta-D-Glucopyranosyl-11-hydroxyjasmonic acid	metab_8985	4.33e-05	0.0001035	1.483	1.4836	0.5488	-0.8657	yes	-	-	-	-	-	-	-	HMDB0039964	Lipids and lipid-like molecules	Fatty Acyls	Fatty acyl glycosides	-	387.168	4.20215	M-H	C18H28O9	0	40.3	neg
pos_7034	4-Methyl-5-Thiazoleethanol	metab_6651	2.33e-05	5.67e-05	1.4827	1.4886	1.6736	0.743	yes	C04294	-	-	map00730;map01100;map01240	Thiamine metabolism;Metabolic pathways;Biosynthesis of cofactors	Metabolism;Metabolism;Metabolism	Metabolism of cofactors and vitamins;Global and overview maps;Global and overview maps	HMDB0032985	Organoheterocyclic compounds	Azoles	Thiazoles	137-00-8	144.048	2.77982	M+H	C6H9NOS	88.7	0	pos
neg_2674	Beta-Guanidinopropionic acid	metab_9611	0.01019	0.01367	1.482	1.4645	2.3928	1.2587	yes	C03065	-	-	-	-	-	-	HMDB0013222	Organic nitrogen compounds	Organonitrogen compounds	Guanidines	-	261.134	5.22158	2M-H	C4H9N3O2	0	35.7	neg
pos_6767	3,4-Dihydroxyphenyl ethanol	metab_6354	0.0008743	0.001434	1.4806	1.4721	1.9679	0.9766	yes	-	-	-	-	-	-	-	-	-	-	-	-	155.07	3.06492	M+H	C8H10O3	36	0	pos
pos_1335	Ipratropium bromide	metab_373	8.52e-06	2.37e-05	1.4803	1.4747	1.5663	0.6473	yes	C07052	-	-	-	-	-	-	HMDB0249401;HMDB0014476	Lipids and lipid-like molecules	Fatty Acyls	Fatty acids and conjugates	60205-81-4	374.253	6.0355	M+2Na-H, M+ACN+H	C20H30NO3+	0	47.6	pos
neg_1706	(5Z)-(15S)-11alpha-Hydroxy-9,15-dioxoprostanoate	metab_8540	2.68e-05	6.92e-05	1.4786	1.4836	1.782	0.8335	yes	C04671	-	-	-	-	-	-	HMDB0012481;HMDB0002776	Lipids and lipid-like molecules	Fatty Acyls	Eicosanoids	363-23-5	397.221	3.66632	M+FA-H	C20H32O5	0	48.1	neg
neg_3364	N-Eicosapentaenoyl Tryptophan	metab_10373	3.62e-06	1.3e-05	1.4783	1.4794	1.6098	0.6869	yes	-	-	-	-	-	-	-	HMDB0242081	Not Available	Not Available	Not Available	-	523.273	6.37492	M+Cl	C31H40N2O3	0	57.4	neg
neg_4729	N-Demethyl Mifepristone	metab_11883	0.02193	0.02794	1.4778	1.4572	2.5803	1.3676	yes	-	-	-	-	-	-	-	HMDB0255109	Lipids and lipid-like molecules	Steroids and steroid derivatives	Oxosteroids	-	452.196	6.0272	M+K-2H	C28H33NO2	0	53	neg
pos_4494	Ercalcitriol	metab_3849	1.63e-08	1.43e-07	1.4778	1.4803	1.4113	0.497	yes	-	-	-	-	-	-	-	HMDB0006225	Lipids and lipid-like molecules	Steroids and steroid derivatives	Vitamin D and derivatives	60133-18-8	461.362	6.63155	M+CH3OH+H	C28H44O3	0	55.8	pos
pos_4606	Kaur-16-en-18-oic Acid	metab_3973	1.55e-10	6.77e-09	1.4775	1.4768	1.5394	0.6224	yes	C11874	-	-	map01100;map00904;map01110	Metabolic pathways;Diterpenoid biosynthesis;Biosynthesis of secondary metabolites	Metabolism;Metabolism;Metabolism	Global and overview maps;Metabolism of terpenoids and polyketides;Global and overview maps	LMPR01040120;HMDB0247185;HMDB0302664;MJDBOTE0001298	Lipids and lipid-like molecules	Prenol lipids	Diterpenoids	6730-83-2	303.232	6.48835	M+H	C20H30O2	32.5	0	pos
neg_3301	7,8-Dihydro-3b,6a-dihydroxy-alpha-ionol 9-glucoside	metab_10304	2.19e-09	5.49e-08	1.4765	1.4779	0.6697	-0.5784	yes	-	-	-	-	-	-	-	HMDB0041578	Lipids and lipid-like molecules	Fatty Acyls	Fatty acyl glycosides	177261-75-5	371.207	6.25812	M-H2O-H	C19H34O8	0	32.8	neg
pos_3045	Sabeluzole	metab_2259	5.5e-06	1.63e-05	1.4764	1.4872	1.7616	0.8169	yes	-	-	-	-	-	-	-	HMDB0257434	Organoheterocyclic compounds	Benzothiazoles	Not Available	-	448.207	5.10575	M+CH3OH+H	C22H26FN3O2S	0	54.3	pos
pos_5327	N2-gamma-L-Glutamyl-L-arginine	metab_4765	9.97e-07	3.73e-06	1.4755	1.4739	1.4939	0.5791	yes	-	-	-	-	-	-	-	HMDB0029143;HMDB0303468	Organic acids and derivatives	Carboxylic acids and derivatives	Amino acids, peptides, and analogues	31106-03-3	607.312	5.6116	2M+H	C11H21N5O5	0	31	pos
neg_1308	Histidinyl-Tryptophan	metab_8099	4.87e-05	0.0001146	1.4749	1.4773	0.5745	-0.7995	yes	-	-	-	-	-	-	-	HMDB0304782;HMDB0028896	Organic acids and derivatives	Carboxylic acids and derivatives	Amino acids, peptides, and analogues	23403-90-9	340.141	3.21747	M-H	C17H19N5O3	0	60.7	neg
pos_5021	3-keto-Digoxigenin	metab_4431	8.12e-09	8.96e-08	1.4745	1.4744	1.4828	0.5684	yes	C07359	-	-	-	-	-	-	HMDB0060746	Organoheterocyclic compounds	Benzodiazepines	1,4-benzodiazepines	-	421.258	6.04348	M+CH3OH+H	C23H32O5	0	40.1	pos
pos_1990	Asn Leu Gln	metab_1096	1.82e-05	4.59e-05	1.4735	1.4829	0.612	-0.7084	yes	-	-	-	-	-	-	-	-	-	-	-	-	374.203	2.49232	M+H	C15H27N5O6	38.3	0	pos
neg_1574	Arg Ile Asp Asp	metab_8393	4.81e-09	9.1e-08	1.4734	1.4744	0.5955	-0.7478	yes	-	-	-	-	-	-	-	-	-	-	-	-	516.243	3.50913	M-H	C20H35N7O9	40.6	0	neg
pos_2816	Gibberellin A15	metab_7721	1.09e-11	1.2e-09	1.4731	1.475	1.671	0.7407	yes	C11860	-	-	map01100;map00904;map01110	Metabolic pathways;Diterpenoid biosynthesis;Biosynthesis of secondary metabolites	Metabolism;Metabolism;Metabolism	Global and overview maps;Metabolism of terpenoids and polyketides;Global and overview maps	LMPR0104170017;HMDB0303456	Lipids and lipid-like molecules	Prenol lipids	Diterpenoids	-	353.17	4.41453	M+Na	C20H26O4	0	53.2	pos
neg_5609	Merodesmosine	metab_12859	1.93e-07	1.31e-06	1.4729	1.4696	0.6329	-0.6599	yes	-	-	-	-	-	-	-	HMDB0030407	Organic acids and derivatives	Carboxylic acids and derivatives	Amino acids, peptides, and analogues	17096-97-8	383.23	4.90363	M-H2O-H	C18H34N4O6	0	42	neg
neg_3049	Ginkgolide A	metab_10025	2.04e-07	1.36e-06	1.4722	1.4718	1.8244	0.8674	yes	C07601	-	-	map01110;map01062	Biosynthesis of secondary metabolites;Biosynthesis of terpenoids and steroids	Metabolism;Metabolism	Global and overview maps;Chemical structure transformation maps	HMDB0036862;LMPR0104540001;MJDBOTE0001317	Lipids and lipid-like molecules	Prenol lipids	Sesquiterpenoids	15291-75-5	389.124	5.87652	M-H2O-H	C20H24O9	0	37.2	neg
pos_1547	Glu Glu Lys	metab_608	9.58e-08	5.4e-07	1.4712	1.472	0.6747	-0.5676	yes	-	-	-	-	-	-	-	-	-	-	-	-	405.198	2.78778	M+H, M+2Na-H	C16H28N4O8	53.2	0	pos
pos_1292	9S,10S,11R-trihydroxy-12Z-octadecenoic acid	metab_325	7.76e-05	0.0001651	1.4711	1.4618	1.6293	0.7043	yes	-	-	-	-	-	-	-	LMFA02000011	-	-	-	-	313.237	6.0993	M+H-H2O, M+NH4	C18H34O5	42.2	0	pos
neg_2427	Glycyl-histidyl-arginyl-proline	metab_9337	0.0009488	0.001575	1.4694	1.4751	0.5346	-0.9034	yes	-	-	-	-	-	-	-	HMDB0252877	Organic acids and derivatives	Carboxylic acids and derivatives	Amino acids, peptides, and analogues	-	486.22	4.7733	M+Na-2H	C19H31N9O5	0	43.7	neg
pos_1808	4-Hydroxy-L-glutamic acid	metab_7698	1.11e-06	4.08e-06	1.4692	1.4732	0.6665	-0.5853	yes	C05947	-	-	map01100;map00330	Metabolic pathways;Arginine and proline metabolism	Metabolism;Metabolism	Global and overview maps;Amino acid metabolism	HMDB0002273;PW_C001535	Organic acids and derivatives	Carboxylic acids and derivatives	Amino acids, peptides, and analogues	2485-33-8	205.082	0.945833	M+ACN+H	C5H9NO5	0	35.4	pos
neg_3135	3b-Hydroxy-6b-methoxy-7(11)-eremophilen-12,8a-olide	metab_10120	2.04e-11	2.75e-09	1.4688	1.4683	1.652	0.7242	yes	-	-	-	-	-	-	-	HMDB0040755	Lipids and lipid-like molecules	Prenol lipids	Terpene lactones	162613-64-1	315.135	5.95487	M+Cl	C16H24O4	0	64.4	neg
pos_1353	10-Nitrolinoleic acid	metab_393	0.0001072	0.0002193	1.4673	1.4579	1.521	0.605	yes	C13800	-	-	-	-	-	-	LMFA01120001;HMDB0005049	Lipids and lipid-like molecules	Fatty Acyls	Lineolic acids and derivatives	774603-04-2	358.258	5.99563	M+H-H2O, M+CH3OH+H	C18H31NO4	0	54	pos
neg_4757	Hydroxyrepaglinide	metab_11914	3.4e-08	3.53e-07	1.4672	1.4684	1.4527	0.5388	yes	-	-	-	-	-	-	-	HMDB0060979	Organoheterocyclic compounds	Piperidines	Phenylpiperidines	-	503.232	6.00183	M+Cl	C27H36N2O5	0	32.3	neg
pos_923	(10Z)-Pentadec-10-enoylcarnitine	metab_7610	1.12e-06	4.12e-06	1.4669	1.4712	1.4454	0.5314	yes	-	-	-	-	-	-	-	HMDB0241436	Lipids and lipid-like molecules	Fatty Acyls	Fatty acid esters	-	425.341	6.50427	M+H-H2O, M+ACN+H	C22H41NO4	0	36.4	pos
pos_3634	7-dehydrocholesterol	metab_7703	0.0002741	0.0005081	1.4669	1.4748	1.4923	0.5776	yes	C01164	Steroids	27-Carbon atoms	map01100;map01110;map00981;map00100	Metabolic pathways;Biosynthesis of secondary metabolites;Insect hormone biosynthesis;Steroid biosynthesis	Metabolism;Metabolism;Metabolism;Metabolism	Global and overview maps;Global and overview maps;Metabolism of terpenoids and polyketides;Lipid metabolism	HMDB0000876;PW_C000022;HMDB0000032;LMST01010069	Lipids and lipid-like molecules	Steroids and steroid derivatives	Vitamin D and derivatives	67-97-0;434-16-2	385.346	6.76657	M+H	C27H44O	45	0	pos
pos_4772	N-Myristoyl Arginine	metab_4154	2.18e-08	1.76e-07	1.4661	1.4646	1.4352	0.5212	yes	-	-	-	-	-	-	-	HMDB0242046	Organic acids and derivatives	Carboxylic acids and derivatives	Amino acids, peptides, and analogues	-	423.274	6.26568	M+K	C20H40N4O3	0	43.7	pos
neg_1763	Murnac-tripeptide	metab_8603	4.03e-06	1.42e-05	1.4656	1.4663	0.6316	-0.6629	yes	-	-	-	-	-	-	-	HMDB0254953	Organic acids and derivatives	Carboxylic acids and derivatives	Amino acids, peptides, and analogues	-	663.285	3.74533	M-H	C26H44N6O14	0	78.9	neg
neg_5166	2-(Dimethylamino)phenol	metab_12368	2.32e-08	2.69e-07	1.4633	1.4639	1.8878	0.9167	yes	-	-	-	-	-	-	-	HMDB0245103	Organic nitrogen compounds	Organonitrogen compounds	Amines	-	136.076	5.5711	M-H	C8H11NO	0	37	neg
neg_4965	LysoPA(22:6(4Z,7Z,10Z,13Z,16Z,19Z)/0:0)	metab_12144	7.42e-05	0.0001648	1.4633	1.4589	1.6235	0.6991	yes	-	-	-	-	-	-	-	HMDB0114755	Lipids and lipid-like molecules	Glycerophospholipids	Glycerophosphates	-	517.211	5.86083	M+Cl	C25H39O7P	0	31.9	neg
pos_3434	Vicriviroc	metab_2686	3.43e-06	1.09e-05	1.4632	1.4677	0.7181	-0.4777	yes	-	-	-	-	-	-	-	HMDB0259804	Benzenoids	Benzene and substituted derivatives	Trifluoromethylbenzenes	-	516.299	6.13907	M+H-H2O	C28H38F3N5O2	0	53.3	pos
neg_5783	N-(4-Amino-2,5-diethoxyphenyl)benzamide	metab_13051	3.55e-05	8.76e-05	1.4626	1.4528	1.6352	0.7094	yes	-	-	-	-	-	-	-	HMDB0244456	Benzenoids	Benzene and substituted derivatives	Anilides	-	345.149	4.6258	M+FA-H	C17H20N2O3	0	34.3	neg
pos_3323	Beta-Zearalanol	metab_2565	3.1e-05	7.29e-05	1.4624	1.4528	1.554	0.636	yes	C14753	-	-	-	-	-	-	-	-	-	-	42422-68-4	323.185	5.9238	M+H	C18H26O5	62.7	0	pos
neg_3111	4-Hydroxyandrostenedione glucuronide	metab_10094	0.003328	0.004903	1.4622	1.4725	0.4687	-1.0931	yes	C11455	-	-	map01100;map01110;map00100	Metabolic pathways;Biosynthesis of secondary metabolites;Steroid biosynthesis	Metabolism;Metabolism;Metabolism	Global and overview maps;Global and overview maps;Lipid metabolism	LMST05010040;HMDB0010315	Lipids and lipid-like molecules	Steroids and steroid derivatives	Cholestane steroids	-	477.213	5.93142	M-H	C25H34O9	0	67.4	neg
pos_1664	Pindolol	metab_737	6.18e-05	0.0001345	1.4618	1.4635	0.6616	-0.596	yes	C07445	-	-	-	-	-	-	HMDB0015095;PW_C009401;MJDBOTE0000319	Organoheterocyclic compounds	Indoles and derivatives	Indoles	13523-86-9	287.117	1.28652	M+K, M+ACN+Na	C14H20N2O2	0	40.7	pos
pos_4333	1-Nonadecanoyl-glycero-3-phosphoethanolamine	metab_3671	9.03e-05	0.0001887	1.4617	1.4527	0.7151	-0.4838	yes	-	-	-	-	-	-	-	LMGP02050028;HMDB0243971	Lipids and lipid-like molecules	Glycerophospholipids	Glycerophosphoethanolamines	-	991.672	6.92557	2M+H	C24H50NO7P	0	72.3	pos
neg_4773	(2E,4E)-2,4-Hexadienoic acid	metab_11932	2.18e-09	5.49e-08	1.4601	1.457	1.614	0.6906	yes	-	-	-	-	-	-	-	HMDB0029581	Lipids and lipid-like molecules	Fatty Acyls	Fatty acids and conjugates	110-44-1	335.153	5.98617	3M-H	C6H8O2	0	31.5	neg
neg_259	Mabioside E	metab_9517	7.38e-09	1.22e-07	1.4599	1.4616	0.6235	-0.6815	yes	-	-	-	-	-	-	-	HMDB0040654	Lipids and lipid-like molecules	Prenol lipids	Triterpenoids	156980-56-2	518.229	4.3752	M-2H, M-H	C48H78O22S	0	81.2	neg
neg_1300	Calanolide A	metab_8091	0.000254	0.0004858	1.4593	1.4661	0.607	-0.7201	yes	C09147	-	-	-	-	-	-	HMDB0249535	Phenylpropanoids and polyketides	Coumarins and derivatives	Pyranocoumarins	142632-32-4	405.145	3.20182	M+Cl	C22H26O5	0	52.6	neg
pos_5783	Tryptophyl-Arginine	metab_5265	1.69e-08	1.45e-07	1.4589	1.4595	1.596	0.6745	yes	-	-	-	-	-	-	-	HMDB0029077	Organic acids and derivatives	Carboxylic acids and derivatives	Amino acids, peptides, and analogues	-	325.175	4.66372	M+H-2H2O	C17H24N6O3	0	44.6	pos
pos_2888	5-O-Methylembelin	metab_2083	7.63e-12	8.87e-10	1.4573	1.4573	1.6732	0.7426	yes	C10373	-	-	-	-	-	-	LMPK15050007;HMDB0040867	Organic oxygen compounds	Organooxygen compounds	Carbonyl compounds	56005-10-8	353.17	4.61572	M+2Na-H	C18H28O4	0	36.9	pos
pos_2720	(6S,8Z)-6-Hydroxy-3-oxotetradecenoic acid	metab_1900	0.002045	0.003115	1.4572	1.4423	1.9166	0.9385	yes	-	-	-	-	-	-	-	HMDB0062364	Lipids and lipid-like molecules	Fatty Acyls	Fatty acids and conjugates	-	274.201	4.14067	M+NH4	C14H24O4	0	42.3	pos
pos_3348	Cer(d16:1/22:6(5Z,8E,10Z,13Z,15E,19Z)-2OH(7S, 17S))	metab_2591	5.25e-06	1.57e-05	1.4568	1.4648	1.5939	0.6726	yes	-	-	-	-	-	-	-	HMDB0289871	Not Available	Not Available	Not Available	-	578.453	5.9558	M+H-2H2O	C38H63NO5	0	88.7	pos
pos_5445	Ganoderic acid H	metab_4896	9.52e-11	4.99e-09	1.4562	1.4581	0.657	-0.6061	yes	-	-	-	-	-	-	-	HMDB0035987	Lipids and lipid-like molecules	Prenol lipids	Triterpenoids	98665-19-1	617.272	5.34577	M+2Na-H	C32H44O9	0	30.8	pos
pos_3029	Gardenin B	metab_2241	1.61e-08	1.41e-07	1.4561	1.4556	1.6771	0.7459	yes	C15109	-	-	-	-	-	-	HMDB0302154;LMPK12111451	Phenylpropanoids and polyketides	Flavonoids	O-methylated flavonoids	2798-20-1	341.102	5.05775	M+H-H2O	C19H18O7	0	71.2	pos
neg_4431	24,24-Difluoro-1alpha,25-dihydroxyvitamin D3	metab_11554	2.3e-08	2.68e-07	1.4557	1.4525	1.5298	0.6133	yes	-	-	-	-	-	-	-	HMDB0242645;LMST03020145	Lipids and lipid-like molecules	Steroids and steroid derivatives	Vitamin D and derivatives	-	433.296	6.45287	M-H2O-H	C27H42F2O3	0	63.5	neg
pos_5660	Trp Trp Glu	metab_5130	1.53e-09	2.81e-08	1.4557	1.4558	0.6419	-0.6396	yes	-	-	-	-	-	-	-	-	-	-	-	-	520.219	4.92107	M+H	C27H29N5O6	82.3	0	pos
pos_2222	Tyrosyl-Lysine	metab_1352	3.49e-06	1.11e-05	1.4556	1.4507	1.5906	0.6696	yes	-	-	-	-	-	-	-	HMDB0029110	Organic acids and derivatives	Carboxylic acids and derivatives	Amino acids, peptides, and analogues	-	342.202	3.00133	M+CH3OH+H	C15H23N3O4	0	62.4	pos
neg_1341	Blasticidin S	metab_8136	5.1e-06	1.72e-05	1.4556	1.4572	0.6727	-0.572	yes	C02010	-	-	-	-	-	-	HMDB0030452	Organic acids and derivatives	Carboxylic acids and derivatives	Amino acids, peptides, and analogues	2079-00-7	403.183	3.24877	M-H2O-H	C17H26N8O5	0	73.8	neg
pos_563	Thyrotropin-releasing factor	metab_5097	4.82e-06	1.46e-05	1.4548	1.4583	0.6674	-0.5833	yes	C03958	Hormones and transmitters	Peptide hormones	-	-	-	-	HMDB0259062;HMDB0060088;HMDB0060080	Organic acids and derivatives	Carboxylic acids and derivatives	Amino acids, peptides, and analogues	-	395.202	3.51208	M+H, M+CH3OH+H	C16H22N6O4	0	42.8	pos
pos_3583	Coprocholic acid	metab_2847	0.0002779	0.0005147	1.4546	1.4603	1.5119	0.5964	yes	-	-	-	-	-	-	-	HMDB0000601	Lipids and lipid-like molecules	Steroids and steroid derivatives	Bile acids, alcohols and derivatives	547-98-8	468.368	6.58388	M+NH4	C27H46O5	0	45.6	pos
pos_3650	Dehydroepiandrosterone	metab_2920	3.95e-13	1.5e-10	1.4543	1.4545	1.5592	0.6408	yes	C01227	Steroids;Hormones and transmitters	19-Carbon atoms;Steroid hormones	map01100;map05215;map00984;map01120;map05200;map04913;map00140	Metabolic pathways;Prostate cancer;Steroid degradation;Microbial metabolism in diverse environments;Pathways in cancer;Ovarian steroidogenesis;Steroid hormone biosynthesis	Metabolism;Human Diseases;Metabolism;Metabolism;Human Diseases;Organismal Systems;Metabolism	Global and overview maps;Cancer: specific types;Xenobiotics biodegradation and metabolism;Global and overview maps;Cancer: overview;Endocrine system;Lipid metabolism	LMST02020021;HMDB0000077;PW_C000054;HMDB0005962;MJDBOTE0001055	Lipids and lipid-like molecules	Steroids and steroid derivatives	Androstane steroids	53-43-0;2283-82-1	289.216	6.8064	M+H	C19H28O2	0	39.2	pos
pos_5859	CDP-DG(20:5(6E,8Z,11Z,14Z,17Z)-OH(5)/i-20:0)	metab_5349	0.0001527	0.0003007	1.454	1.4631	0.543	-0.8809	yes	-	-	-	-	-	-	-	HMDB0294156	Not Available	Not Available	Not Available	-	536.782	4.50322	M+2H	C52H87N3O16P2	0	38.7	pos
pos_2414	Ser Glu Ile Glu	metab_1563	0.0002259	0.0004271	1.4532	1.4495	0.6571	-0.6058	yes	-	-	-	-	-	-	-	-	-	-	-	-	477.219	3.42407	M+H	C19H32N4O10	44.3	0	pos
neg_7406	Glycylhydroxyproline	metab_14844	2.27e-10	1.45e-08	1.4532	1.4516	1.5779	0.658	yes	-	-	-	-	-	-	-	HMDB0011173	Organic acids and derivatives	Carboxylic acids and derivatives	Amino acids, peptides, and analogues	24587-32-4	169.061	0.946067	M-H2O-H	C7H12N2O4	0	49.6	neg
pos_6820	Azetirelin	metab_6414	0.001946	0.002972	1.4527	1.4617	0.6065	-0.7215	yes	-	-	-	-	-	-	-	HMDB0248799	Organic acids and derivatives	Carboxylic acids and derivatives	Amino acids, peptides, and analogues	-	381.187	2.98535	M+CH3OH+H	C15H20N6O4	0	31.8	pos
pos_5654	Norlaudanosoline	metab_7744	1.12e-07	6.16e-07	1.4526	1.4511	1.6014	0.6793	yes	C02916	-	-	map00950;map01110	Isoquinoline alkaloid biosynthesis;Biosynthesis of secondary metabolites	Metabolism;Metabolism	Biosynthesis of other secondary metabolites;Global and overview maps	HMDB0012486	Organoheterocyclic compounds	Isoquinolines and derivatives	Benzylisoquinolines	57073-15-1;4747-99-3	305.149	4.93772	M+NH4	C16H17NO4	0	60.1	pos
pos_2454	Lidoflazine	metab_1607	2.88e-06	9.36e-06	1.4522	1.4584	0.6601	-0.5992	yes	-	-	-	-	-	-	-	HMDB0254083	Benzenoids	Benzene and substituted derivatives	Diphenylmethanes	-	524.308	3.51208	M+CH3OH+H	C30H35F2N3O	0	52.4	pos
neg_4975	Janthitrem G	metab_12155	1.56e-09	4.48e-08	1.4522	1.4504	0.6096	-0.714	yes	-	-	-	-	-	-	-	HMDB0030531	Organic acids and derivatives	Peptidomimetics	Depsipeptides	90986-51-9	610.357	5.85298	M-H2O-H	C39H51NO6	0	71	neg
pos_2810	Neostigmine	metab_2000	0.000158	0.0003096	1.4521	1.4549	0.5162	-0.9541	yes	C07258	-	-	-	-	-	-	HMDB0015472	Benzenoids	Benzene and substituted derivatives	Phenoxy compounds	59-99-4	268.118	4.40652	M+2Na-H	C12H19N2O2+	78.5	0	pos
pos_6060	N-Acetylserotonin	metab_5574	1.17e-06	4.25e-06	1.4515	1.4592	0.5995	-0.7381	yes	C00978	-	-	map01100;map01110;map00380	Metabolic pathways;Biosynthesis of secondary metabolites;Tryptophan metabolism	Metabolism;Metabolism;Metabolism	Global and overview maps;Global and overview maps;Amino acid metabolism	PW_C000956;HMDB0001238	Organoheterocyclic compounds	Indoles and derivatives	Hydroxyindoles	1210-83-9	251.139	4.11663	M+CH3OH+H	C12H14N2O2	0	43.1	pos
neg_1260	Edivoxetine	metab_8046	0.0001112	0.0002333	1.4511	1.4604	0.6288	-0.6693	yes	-	-	-	-	-	-	-	HMDB0251701	Benzenoids	Phenol ethers	Anisoles	-	374.157	3.0444	M+Cl	C18H26FNO4	0	35.9	neg
pos_910	Becocalcidiol	metab_7596	0.01075	0.01425	1.451	1.4431	1.6915	0.7583	yes	-	-	-	-	-	-	-	HMDB0248927	Lipids and lipid-like molecules	Steroids and steroid derivatives	Vitamin D and derivatives	-	327.268	6.40885	M+H-H2O, M+H	C23H36O2	0	42.3	pos
neg_4770	20-Hydroxyeicosatetraenoic acid	metab_11929	3.79e-09	7.91e-08	1.4507	1.4521	1.5059	0.5907	yes	C14748	-	-	map00590;map01100;map04270	Arachidonic acid metabolism;Metabolic pathways;Vascular smooth muscle contraction	Metabolism;Metabolism;Organismal Systems	Lipid metabolism;Global and overview maps;Circulatory system	PW_C002614;HMDB0005998	Lipids and lipid-like molecules	Fatty Acyls	Fatty acids and conjugates	79551-86-3	365.233	5.98617	M+FA-H	C20H32O3	0	34.8	neg
pos_7429	6-O-(6-Deoxy-alpha-L-mannopyranosyl)-beta-D-glucopyranose	metab_7082	5.82e-05	0.0001275	1.4497	1.4492	1.4629	0.5488	yes	C08247	Carbohydrates	Oligosaccharides	-	-	-	-	HMDB0247100;HMDB0302439	Organic oxygen compounds	Organooxygen compounds	Carbohydrates and carbohydrate conjugates	-	349.11	0.992917	M+Na	C12H22O10	0	61.1	pos
pos_3268	Nuatigenin	metab_2503	5.82e-10	1.53e-08	1.4493	1.451	1.6108	0.6878	yes	C04715	Steroids	27-Carbon atoms	-	-	-	-	HMDB0301755;LMST01090001	Lipids and lipid-like molecules	Steroids and steroid derivatives	Furospirostanes and derivatives	6811-35-4	431.315	5.80398	M+H	C27H42O4	0	54.7	pos
neg_7082	Linatine	metab_14489	2.61e-05	6.77e-05	1.4491	1.4515	0.5999	-0.7371	yes	C05939	-	-	map01100;map00330	Metabolic pathways;Arginine and proline metabolism	Metabolism;Metabolism	Global and overview maps;Amino acid metabolism	HMDB0038516	Organic acids and derivatives	Carboxylic acids and derivatives	Amino acids, peptides, and analogues	10139-06-7	517.226	3.20965	2M-H	C10H17N3O5	0	47.3	neg
pos_3553	PC(PGD1/16:0)	metab_2815	0.002063	0.003139	1.449	1.4502	0.6513	-0.6187	yes	-	-	-	-	-	-	-	HMDB0285990	Not Available	Not Available	Not Available	-	796.542	6.45648	M+H-2H2O	C44H82NO11P	0	42.3	pos
pos_6131	Norbolethone	metab_5653	0.0004143	0.000733	1.4489	1.4395	1.7095	0.7736	yes	D05204	-	-	-	-	-	-	HMDB0006026	Lipids and lipid-like molecules	Steroids and steroid derivatives	Pregnane steroids	1235-15-0	339.228	4.00333	M+Na	C21H32O2	0	53	pos
pos_2056	Deoxythioguanosine	metab_1169	7.5e-05	0.0001603	1.4471	1.4489	1.6508	0.7232	yes	-	-	-	-	-	-	-	HMDB0251016	Nucleosides, nucleotides, and analogues	Purine nucleosides	Purine 2'',3''-dideoxyribonucleosides	-	248.059	2.68427	M+H-2H2O	C10H13N5O3S	0	44.2	pos
pos_4986	(11S,12S,13S)-Epoxy-hydroxyoctadeca-cis-9-cis-15-dien-1-oic acid	metab_4390	0.0001323	0.0002641	1.4451	1.4365	1.5854	0.6649	yes	-	-	-	-	-	-	-	HMDB0302825	Lipids and lipid-like molecules	Fatty Acyls	Fatty acids and conjugates	-	328.248	6.07533	M+NH4	C18H30O4	0	60.7	pos
pos_6390	3-Methylsuberic acid	metab_5940	0.0001354	0.0002699	1.4448	1.4347	1.7601	0.8157	yes	-	-	-	-	-	-	-	HMDB0059783;LMFA01030981	Lipids and lipid-like molecules	Fatty Acyls	Fatty acids and conjugates	-	171.102	3.60122	M+H-H2O	C9H16O4	0	46.8	pos
neg_2724	Citrusin III	metab_9666	1.83e-09	5.03e-08	1.4442	1.4459	0.6436	-0.6359	yes	-	-	-	-	-	-	-	HMDB0303682	Organic acids and derivatives	Carboxylic acids and derivatives	Amino acids, peptides, and analogues	-	762.353	5.29132	M+Cl	C36H53N7O9	0	77.1	neg
pos_2878	Prolylhydroxyproline	metab_2072	1.98e-06	6.75e-06	1.4425	1.4407	0.6089	-0.7158	yes	-	-	-	-	-	-	-	HMDB0256781;HMDB0006695	Organic acids and derivatives	Carboxylic acids and derivatives	Amino acids, peptides, and analogues	18684-24-7	457.229	4.58372	2M+H	C10H16N2O4	0	48.3	pos
neg_2836	Ajugol	metab_9790	4.26e-09	8.53e-08	1.4423	1.4421	0.652	-0.6172	yes	-	-	-	-	-	-	-	HMDB0248074;HMDB0242331	Lipids and lipid-like molecules	Prenol lipids	Terpene glycosides	-	347.135	5.48687	M-H	C15H24O9	0	30.3	neg
pos_5403	17alpha-Estradiol	metab_4850	3.55e-08	2.54e-07	1.4421	1.4425	1.641	0.7146	yes	C02537	Steroids	18-Carbon atoms	map00140	Steroid hormone biosynthesis	Metabolism	Lipid metabolism	HMDB0000429	Lipids and lipid-like molecules	Steroids and steroid derivatives	Estrane steroids	57-91-0	317.149	5.44247	M+2Na-H	C18H24O2	0	56.2	pos
neg_5319	1,3-Bis(hydroxymethyl)-3-methylbicyclo[2.2.1]heptan-2-one	metab_12537	3.36e-06	1.23e-05	1.4416	1.4353	1.6775	0.7463	yes	-	-	-	-	-	-	-	HMDB0303357	Lipids and lipid-like molecules	Prenol lipids	Monoterpenoids	-	229.108	5.33688	M+FA-H	C10H16O3	0	67	neg
neg_6007	9-Carboxymethoxymethylguanine	metab_13300	8.47e-11	7.32e-09	1.4404	1.4398	1.6834	0.7514	yes	-	-	-	-	-	-	-	HMDB0060805	Organoheterocyclic compounds	Imidazopyrimidines	Purines and purine derivatives	-	274.033	4.32042	M+Cl	C8H9N5O4	0	44.8	neg
neg_2846	Deflazacort	metab_9801	0.0004443	0.000801	1.4403	1.4449	0.5437	-0.879	yes	-	-	-	-	-	-	-	HMDB0250935	Lipids and lipid-like molecules	Steroids and steroid derivatives	Pregnane steroids	-	486.209	5.50255	M+FA-H	C25H31NO6	0	46.1	neg
neg_2446	Ent-Abacavir	metab_9358	0.0001056	0.0002231	1.4399	1.447	0.5803	-0.7851	yes	-	-	-	-	-	-	-	HMDB0251820	Nucleosides, nucleotides, and analogues	Nucleoside and nucleotide analogues	Cyclopentyl nucleosides	-	331.151	4.81148	M+FA-H	C14H18N6O	0	30.3	neg
neg_6092	2-n-Propyl-4-oxopentanoic acid	metab_13394	0.0002628	0.0005011	1.4397	1.4269	1.67	0.7399	yes	C16655	-	-	map00982	Drug metabolism - cytochrome P450	Metabolism	Xenobiotics biodegradation and metabolism	HMDB0060683;PW_C040565	Organic acids and derivatives	Keto acids and derivatives	Gamma-keto acids and derivatives	-	203.092	4.20215	M+FA-H	C8H14O3	0	66.2	neg
pos_7306	Xanthine	metab_6948	5.26e-08	3.4e-07	1.4397	1.4362	1.3524	0.4356	yes	C00385	-	-	map01100;map01110;map00230;map01120;map00232;map01065;map01060	Metabolic pathways;Biosynthesis of secondary metabolites;Purine metabolism;Microbial metabolism in diverse environments;Caffeine metabolism;Biosynthesis of alkaloids derived from histidine and purine;Biosynthesis of plant secondary metabolites	Metabolism;Metabolism;Metabolism;Metabolism;Metabolism;Metabolism;Metabolism	Global and overview maps;Global and overview maps;Nucleotide metabolism;Global and overview maps;Biosynthesis of other secondary metabolites;Chemical structure transformation maps;Chemical structure transformation maps	PW_C000198;HMDB0000292;MJDBOTE0000403	Organoheterocyclic compounds	Imidazopyrimidines	Purines and purine derivatives	69-89-6	153.041	1.74957	M+H	C5H4N4O2	89.2	0	pos
pos_7360	Gln Glu Ala	metab_7008	2.04e-09	3.4e-08	1.4392	1.4406	0.6851	-0.5456	yes	-	-	-	-	-	-	-	-	-	-	-	-	347.156	1.39013	M+H	C13H22N4O7	50.8	0	pos
neg_444	Xi-3-Nonenoic acid	metab_11563	3.44e-08	3.53e-07	1.439	1.4378	1.5187	0.6028	yes	-	-	-	-	-	-	-	HMDB0303440	Lipids and lipid-like molecules	Fatty Acyls	Fatty acids and conjugates	-	311.223	6.39045	2M-H, 3M-H	C9H16O2	0	37.5	neg
pos_4489	Choline Phosphate	metab_3843	4.91e-06	1.49e-05	1.4384	1.4315	0.719	-0.4759	yes	C00588	-	-	map01100;map00564;map05231	Metabolic pathways;Glycerophospholipid metabolism;Choline metabolism in cancer	Metabolism;Metabolism;Human Diseases	Global and overview maps;Lipid metabolism;Cancer: overview	HMDB0001565	Organic nitrogen compounds	Organonitrogen compounds	Quaternary ammonium salts	107-73-3;3616-04-4	184.073	6.64738	M+H	C5H14NO4P	58.9	0	pos
pos_1955	Ile Glu Glu	metab_1057	1.1e-10	5.52e-09	1.4382	1.44	0.665	-0.5885	yes	-	-	-	-	-	-	-	-	-	-	-	-	390.187	1.916	M+H	C16H27N3O8	49.8	0	pos
neg_234	Pteroside Z	metab_9242	1.71e-05	4.72e-05	1.4371	1.4315	0.6717	-0.5742	yes	-	-	-	-	-	-	-	HMDB0032587	Organic oxygen compounds	Organooxygen compounds	Carbohydrates and carbohydrate conjugates	35943-37-4	393.188	4.08403	M-H, M+Na-2H	C21H30O7	0	76.6	neg
neg_7354	3,4-Dihydroxy-2-hydroxymethyl-1-pyrrolidinepropanamide	metab_14787	6.33e-07	3.31e-06	1.437	1.4387	0.6651	-0.5883	yes	-	-	-	-	-	-	-	HMDB0039948	Organoheterocyclic compounds	Pyrrolidines	N-alkylpyrrolidines	-	203.103	1.00085	M-H	C8H16N2O4	0	31.3	neg
neg_2888	3-Methyl-3-butenyl apiosyl-(1->6)-glucoside	metab_9847	3.38e-07	2.04e-06	1.4369	1.4326	0.5407	-0.8872	yes	-	-	-	-	-	-	-	HMDB0031954	Lipids and lipid-like molecules	Fatty Acyls	Fatty acyl glycosides	198832-72-3	361.151	5.58533	M-H2O-H	C16H28O10	0	56.3	neg
neg_5829	7-Hydroxy-5-methoxy-4-methyl-3-(4-methylpiperazin-1-yl)-2H-chromen-2-one	metab_13102	4.01e-10	1.9e-08	1.4365	1.4367	1.6637	0.7344	yes	-	-	-	-	-	-	-	HMDB0244641	Phenylpropanoids and polyketides	Coumarins and derivatives	Hydroxycoumarins	-	349.141	4.5596	M+FA-H	C16H20N2O4	0	34.1	neg
neg_6566	2-Methoxyacetaminophen sulfate	metab_13916	2.51e-05	6.56e-05	1.4363	1.4371	0.6128	-0.7065	yes	-	-	-	-	-	-	-	HMDB0062550	Organic acids and derivatives	Organic sulfuric acids and derivatives	Arylsulfates	53446-13-2	242.013	3.68263	M-H2O-H	C9H11NO6S	0	38.6	neg
neg_6094	Cinncassiol D2 glucoside	metab_13396	1.69e-08	2.16e-07	1.4345	1.4363	0.6261	-0.6755	yes	-	-	-	-	-	-	-	HMDB0034679	Lipids and lipid-like molecules	Prenol lipids	Terpene glycosides	-	529.263	4.19432	M-H	C26H42O11	0	61	neg
pos_2760	11-Hydroxyandrosterone	metab_1944	3.22e-08	2.35e-07	1.4343	1.4328	1.5047	0.5895	yes	C14606	-	-	-	-	-	-	HMDB0002984;LMST02020086	Lipids and lipid-like molecules	Steroids and steroid derivatives	Androstane steroids	57-61-4	370.233	4.26998	M+ACN+Na	C19H30O3	0	50.7	pos
pos_5853	PL	metab_5343	0.002028	0.003092	1.4339	1.428	0.5099	-0.9717	yes	C18210	-	-	-	-	-	-	HMDB0302594	Phenylpropanoids and polyketides	Macrolides and analogues	Not Available	-	565.298	4.51122	M+Na	C28H46O10	0	79.1	pos
pos_7490	Cytidine	metab_7148	7.94e-10	1.84e-08	1.4336	1.4347	0.6666	-0.5852	yes	C00475	Nucleic acids	Nucleosides	map00240;map01100;map02010	Pyrimidine metabolism;Metabolic pathways;ABC transporters	Metabolism;Metabolism;Environmental Information Processing	Nucleotide metabolism;Global and overview maps;Membrane transport	PW_C000061;HMDB0000089;HMDB0248553;MJDBOTE0000789	Nucleosides, nucleotides, and analogues	Pyrimidine nucleosides	Not Available	65-46-3	285.119	0.914333	M+ACN+H	C9H13N3O5	0	50.8	pos
neg_5091	(1S,2R,4R,8S)-p-Menthane-2,8,9-triol 9-glucoside	metab_12285	0.001822	0.002832	1.4331	1.4196	1.944	0.959	yes	-	-	-	-	-	-	-	HMDB0039978	Lipids and lipid-like molecules	Prenol lipids	Terpene glycosides	378254-08-1	331.176	5.68528	M-H2O-H	C16H30O8	0	42.2	neg
neg_4474	Asparagoside A	metab_11601	7.27e-06	2.3e-05	1.4327	1.4253	0.6796	-0.5573	yes	C08886	-	-	-	-	-	-	HMDB0030046	Lipids and lipid-like molecules	Fatty Acyls	Fatty acids and conjugates	14835-43-9	623.38	6.39045	M+FA-H	C33H54O8	0	52.8	neg
neg_1421	Pheophorbide a	metab_8225	0.0004031	0.0007346	1.4317	1.4346	0.636	-0.6529	yes	C18021	-	-	map01110;map00860	Biosynthesis of secondary metabolites;Porphyrin and chlorophyll metabolism	Metabolism;Metabolism	Global and overview maps;Metabolism of cofactors and vitamins	HMDB0256449	Not Available	Not Available	Not Available	15664-29-6	591.263	3.33547	M-H	C35H36N4O5	0	64.4	neg
pos_2021	Lysyltyrosine	metab_1132	0.0008154	0.001349	1.4317	1.4402	0.5818	-0.7814	yes	-	-	-	-	-	-	-	HMDB0028963	Organic acids and derivatives	Carboxylic acids and derivatives	Amino acids, peptides, and analogues	35978-98-4	310.176	2.58815	M+H	C15H23N3O4	0	34.8	pos
neg_2598	Nivacortol	metab_9526	0.01508	0.01964	1.4304	1.4112	0.4749	-1.0742	yes	-	-	-	-	-	-	-	HMDB0255670	Lipids and lipid-like molecules	Steroids and steroid derivatives	Estrane steroids	-	429.235	5.09412	M-H	C28H31FN2O	0	49.3	neg
neg_533	PE(18:1/0:0)	metab_12549	0.003439	0.005056	1.4302	1.4505	0.5608	-0.8345	yes	-	-	-	-	-	-	-	LMGP02050004	-	-	-	-	478.294	7.53102	M-H, M+Na-2H	C23H46NO7P	91.7	0	neg
neg_6041	Ferulic Acid	metab_13338	8.66e-09	1.38e-07	1.4301	1.4325	0.5774	-0.7924	yes	C01494	-	-	map01100;map00940;map01110;map01061	Metabolic pathways;Phenylpropanoid biosynthesis;Biosynthesis of secondary metabolites;Biosynthesis of phenylpropanoids	Metabolism;Metabolism;Metabolism;Metabolism	Global and overview maps;Biosynthesis of other secondary metabolites;Global and overview maps;Chemical structure transformation maps	HMDB0000954;MJDBOTE0000325	Phenylpropanoids and polyketides	Cinnamic acids and derivatives	Hydroxycinnamic acids and derivatives	537-98-4	193.05	4.26557	M-H	C10H10O4	98.6	0	neg
neg_7170	Lactic Acid	metab_15379	4.96e-09	9.32e-08	1.43	1.4313	0.5909	-0.7589	yes	C00954	-	-	map01100;map01070;map00380;map04075	Metabolic pathways;Biosynthesis of plant hormones;Tryptophan metabolism;Plant hormone signal transduction	Metabolism;Metabolism;Metabolism;Environmental Information Processing	Global and overview maps;Chemical structure transformation maps;Amino acid metabolism;Signal transduction	HMDB0001311;HMDB0000197;HMDB0000190	Organic acids and derivatives	Hydroxy acids and derivatives	Alpha hydroxy acids and derivatives	87-51-4;79-33-4;10326-41-7;50-21-5	269.088	2.50508	3M-H	C3H6O3	31.9	0	neg
neg_1551	8-methylthiooctyldesulfoglucosinolate	metab_8368	0.008919	0.01209	1.4298	1.4321	0.3695	-1.4363	yes	-	-	-	-	-	-	-	HMDB0304249	Organic oxygen compounds	Organooxygen compounds	Carbohydrates and carbohydrate conjugates	-	378.141	3.48562	M-H2O-H	C16H31NO6S2	0	33.7	neg
pos_3328	1,10-Epoxy-3,8-dihydroxy-4,11(13)-germacradien-12,6-olide	metab_2570	4.82e-06	1.46e-05	1.4291	1.4387	0.6209	-0.6875	yes	-	-	-	-	-	-	-	HMDB0303776	Lipids and lipid-like molecules	Prenol lipids	Terpene lactones	-	322.165	5.93182	M+ACN+H	C15H20O5	0	48.2	pos
pos_1940	Tyrosyl-Gamma-glutamate	metab_1041	2.6e-08	2.01e-07	1.4269	1.429	0.6614	-0.5964	yes	-	-	-	-	-	-	-	HMDB0029119	Organic acids and derivatives	Carboxylic acids and derivatives	Amino acids, peptides, and analogues	-	310.14	1.82128	M+H	C14H19N3O5	0	77.8	pos
neg_6600	2,4-Quinolinediol	metab_13955	9.99e-09	1.51e-07	1.4259	1.4254	1.6641	0.7347	yes	C16716	-	-	map01063	Biosynthesis of alkaloids derived from shikimate pathway	Metabolism	Chemical structure transformation maps	HMDB0245468	Organoheterocyclic compounds	Quinolines and derivatives	Quinolones and derivatives	-	206.045	3.65065	M+FA-H	C9H7NO2	0	60	neg
neg_5283	Exo,exo-1,8-Epoxy-p-menthane-2,6-diol	metab_12498	6.88e-06	2.21e-05	1.4259	1.4188	1.6844	0.7522	yes	C17620	-	-	-	-	-	-	HMDB0041376	Organoheterocyclic compounds	Oxanes	Not Available	38223-98-2	231.123	5.39572	M+FA-H	C10H18O3	0	68.5	neg
neg_2482	Phenyl-Alanine	metab_9398	5.26e-09	9.7e-08	1.4248	1.4222	1.6024	0.6802	yes	C00079	Peptides	Amino acids	map01100;map04978;map01110;map00970;map00460;map00960;map02010;map00998;map01230;map00966;map01210;map00940;map01070;map00360;map04974;map00400;map01064;map01063;map05230;map01061;map01060	Metabolic pathways;Mineral absorption;Biosynthesis of secondary metabolites;Aminoacyl-tRNA biosynthesis;Cyanoamino acid metabolism;Tropane, piperidine and pyridine alkaloid biosynthesis;ABC transporters;Biosynthesis of various secondary metabolites - part 2;Biosynthesis of amino acids;Glucosinolate biosynthesis;2-Oxocarboxylic acid metabolism;Phenylpropanoid biosynthesis;Biosynthesis of plant hor…	Metabolism;Organismal Systems;Metabolism;Genetic Information Processing;Metabolism;Metabolism;Environmental Information Processing;Metabolism;Metabolism;Metabolism;Metabolism;Metabolism;Metabolism;Metabolism;Organismal Systems;Metabolism;Metabolism;Metabolism;Human Diseases;Metabolism;Metabolism	Global and overview maps;Digestive system;Global and overview maps;Translation;Metabolism of other amino acids;Biosynthesis of other secondary metabolites;Membrane transport;Biosynthesis of other secondary metabolites;Global and overview maps;Biosynthesis of other secondary metabolites;Global and overview maps;Biosynthesis of other secondary metabolites;Chemical structure transformation maps;Amin…	HMDB0000159;HMDB0256428	Organic acids and derivatives	Carboxylic acids and derivatives	Amino acids, peptides, and analogues	63-91-2	146.06	4.88793	M-H2O-H	C9H11NO2	0	35.7	neg
neg_1382	Paliperidone	metab_8181	1.74e-09	4.88e-08	1.4246	1.4251	0.6399	-0.644	yes	C21516	-	-	-	-	-	-	HMDB0247256;HMDB0015396;HMDB0256085	Organoheterocyclic compounds	Pyridopyrimidines	Not Available	144598-75-4	471.209	3.29633	M+FA-H	C23H27FN4O3	0	30.2	neg
neg_1945	Phenylalanylhistidine	metab_8805	2.22e-09	5.49e-08	1.4242	1.4263	0.6649	-0.5889	yes	-	-	-	-	-	-	-	HMDB0028892;HMDB0028997	Organic acids and derivatives	Carboxylic acids and derivatives	Amino acids, peptides, and analogues	16874-81-0;33367-37-2	649.269	3.98935	2M+FA-H	C15H18N4O3	0	75.2	neg
pos_7042	Dihydrozeatin	metab_6660	5.9e-08	3.67e-07	1.4241	1.4272	0.7161	-0.4818	yes	C02029	-	-	map01110;map04075;map00908	Biosynthesis of secondary metabolites;Plant hormone signal transduction;Zeatin biosynthesis	Metabolism;Environmental Information Processing;Metabolism	Global and overview maps;Signal transduction;Metabolism of terpenoids and polyketides	HMDB0012215;MJDBZSJ0000131	Organoheterocyclic compounds	Imidazopyrimidines	Purines and purine derivatives	23599-75-9;37789-32-5	254.161	2.77185	M+CH3OH+H	C10H15N5O	0	52.1	pos
neg_4750	Prostaglandin B2	metab_11907	7.49e-08	6.37e-07	1.4232	1.4235	1.4901	0.5754	yes	C05954	Lipids	Eicosanoids	map00590;map01100;map04726	Arachidonic acid metabolism;Metabolic pathways;Serotonergic synapse	Metabolism;Metabolism;Organismal Systems	Lipid metabolism;Global and overview maps;Nervous system	HMDB0004236;LMFA03010018;PW_C002099	Lipids and lipid-like molecules	Fatty Acyls	Eicosanoids	13367-85-6	379.213	6.0095	M+FA-H	C20H30O4	0	65.4	neg
neg_7355	S-Sulfo-L-Cysteine	metab_14788	4.33e-05	0.0001035	1.4231	1.4258	0.7086	-0.4969	yes	C05824	-	-	map01100;map00270;map01230	Metabolic pathways;Cysteine and methionine metabolism;Biosynthesis of amino acids	Metabolism;Metabolism;Metabolism	Global and overview maps;Amino acid metabolism;Global and overview maps	HMDB0000731	Organic acids and derivatives	Carboxylic acids and derivatives	Amino acids, peptides, and analogues	1637-71-4	199.969	1.00085	M-H	C3H7NO5S2	88.6	0	neg
pos_7293	Ectoine	metab_6933	2.99e-06	9.65e-06	1.422	1.4203	0.6874	-0.5407	yes	C06231	-	-	map01100;map01120;map00260	Metabolic pathways;Microbial metabolism in diverse environments;Glycine, serine and threonine metabolism	Metabolism;Metabolism;Metabolism	Global and overview maps;Global and overview maps;Amino acid metabolism	HMDB0240650;MJDBOTE0001351	Organic acids and derivatives	Carboxylic acids and derivatives	Amino acids, peptides, and analogues	96702-03-3	326.182	1.76557	2M+ACN+H	C6H10N2O2	0	35.9	pos
pos_2687	L-Thyronine	metab_1862	0.0009606	0.001563	1.4214	1.4075	2.1733	1.1199	yes	-	-	-	-	-	-	-	HMDB0000667	Organic acids and derivatives	Carboxylic acids and derivatives	Amino acids, peptides, and analogues	1596-67-4	315.137	4.05197	M+ACN+H	C15H15NO4	0	54.2	pos
pos_732	Inproquone	metab_6963	9.89e-09	1.02e-07	1.4213	1.421	1.4497	0.5358	yes	-	-	-	-	-	-	-	HMDB0253499	Organic oxygen compounds	Organooxygen compounds	Carbonyl compounds	-	307.165	4.96173	M+H, M+Na	C16H22N2O4	0	32.3	pos
pos_5412	Corey PG-Lactone Diol	metab_4860	9.9e-05	0.0002043	1.4202	1.4084	1.6051	0.6827	yes	-	-	-	-	-	-	-	-	-	-	-	-	269.174	5.41847	M+H	C15H24O4	45.7	0	pos
pos_2626	Ethyl 7-epi-12-hydroxyjasmonate glucoside	metab_1796	0.001242	0.001971	1.4197	1.4124	0.6049	-0.7252	yes	-	-	-	-	-	-	-	HMDB0036340	Lipids and lipid-like molecules	Fatty Acyls	Fatty acyl glycosides	-	449.239	3.91463	M+CH3OH+H	C20H32O9	0	57.9	pos
pos_5114	2-(5-Methoxy-1H-indol-3-yl)ethyl acetate	metab_4531	4.28e-10	1.25e-08	1.4193	1.4192	1.4992	0.5842	yes	-	-	-	-	-	-	-	HMDB0247825	Organoheterocyclic compounds	Indoles and derivatives	Indoles	-	484.244	5.9558	2M+NH4	C13H15NO3	0	31.2	pos
neg_172	4'-Hydroxy-R-phenprocoumon	metab_8555	6.16e-09	1.09e-07	1.4187	1.4209	0.6917	-0.5318	yes	-	-	-	-	-	-	-	HMDB0060885	Phenylpropanoids and polyketides	Coumarins and derivatives	Hydroxycoumarins	-	277.086	1.80027	M-H2O-H, M-H	C18H16O4	0	49.5	neg
neg_2211	Oripavine	metab_9100	6.06e-08	5.47e-07	1.4186	1.4153	0.547	-0.8703	yes	C06175	-	-	map00950;map01110	Isoquinoline alkaloid biosynthesis;Biosynthesis of secondary metabolites	Metabolism;Metabolism	Biosynthesis of other secondary metabolites;Global and overview maps	HMDB0030251	Alkaloids and derivatives	Morphinans	Not Available	467-04-9	318.109	4.39088	M+Na-2H	C18H19NO3	0	33.7	neg
neg_6182	Barnidipine	metab_13494	1.43e-07	1.05e-06	1.4183	1.4158	1.5686	0.6494	yes	-	-	-	-	-	-	-	HMDB0248875	Organoheterocyclic compounds	Pyridines and derivatives	Hydropyridines	-	536.207	4.09187	M+FA-H	C27H29N3O6	0	61.1	neg
neg_6260	Tirofiban	metab_13578	0.0005761	0.001012	1.418	1.4197	0.6466	-0.629	yes	C07965	-	-	-	-	-	-	HMDB0014913;PW_C009242	Organic acids and derivatives	Carboxylic acids and derivatives	Amino acids, peptides, and analogues	144494-65-5	475.204	4.01348	M+Cl	C22H36N2O5S	0	52.4	neg
pos_6416	Trans-p-Menthane-1,7,8-triol 8-glucoside	metab_5969	1.47e-07	7.67e-07	1.4174	1.4225	0.7037	-0.507	yes	-	-	-	-	-	-	-	HMDB0034784	Organic oxygen compounds	Organooxygen compounds	Carbohydrates and carbohydrate conjugates	217962-29-3	383.229	3.5606	M+CH3OH+H	C16H30O8	0	42.9	pos
neg_1858	LysoPE(0:0/20:3(11Z,14Z,17Z))	metab_8708	9.58e-08	7.65e-07	1.4167	1.4172	0.5823	-0.7802	yes	-	-	-	-	-	-	-	HMDB0011484	Lipids and lipid-like molecules	Glycerophospholipids	Glycerophosphoethanolamines	-	524.272	3.87193	M+Na-2H	C25H46NO7P	0	47.8	neg
neg_2853	Cibenzoline	metab_9809	1.93e-09	5.17e-08	1.4157	1.4178	0.6059	-0.7228	yes	-	-	-	-	-	-	-	HMDB0250229	Benzenoids	Benzene and substituted derivatives	Diphenylmethanes	-	583.31	5.51037	2M+Hac-H	C18H18N2	0	78.7	neg
neg_7129	4-(Methylnitrosamino)-1-(3-pyridyl)-1-butanol glucuronide	metab_14540	0.001186	0.001928	1.4154	1.4252	0.5822	-0.7804	yes	C19605	-	-	map05204;map00980	Chemical carcinogenesis - DNA adducts;Metabolism of xenobiotics by cytochrome P450	Human Diseases;Metabolism	Cancer: overview;Xenobiotics biodegradation and metabolism	HMDB0060383	Lipids and lipid-like molecules	Fatty Acyls	Fatty acyl glycosides	131119-04-5	366.13	3.0758	M-H2O-H	C16H23N3O8	0	35.1	neg
pos_7319	Val Glu Ser	metab_6962	0.0004562	0.0007972	1.4141	1.4163	0.6707	-0.5762	yes	-	-	-	-	-	-	-	-	-	-	-	-	334.161	1.70157	M+H	C13H23N3O7	85.4	0	pos
pos_2001	Tyrosyl-Glutamate	metab_1110	4.39e-05	9.94e-05	1.4141	1.4149	0.6994	-0.5158	yes	-	-	-	-	-	-	-	HMDB0029104	Organic acids and derivatives	Carboxylic acids and derivatives	Amino acids, peptides, and analogues	-	311.124	2.53232	M+H	C14H18N2O6	0	85.8	pos
pos_6322	Myrigalone A	metab_5865	1.5e-07	7.8e-07	1.4139	1.4102	0.6451	-0.6325	yes	-	-	-	-	-	-	-	HMDB0037245	Lipids and lipid-like molecules	Prenol lipids	Monoterpenoids	34328-57-9	642.31	3.68943	2M+ACN+H	C18H20O4	0	32.7	pos
pos_5355	Cycloheximide	metab_4796	0.0005832	0.0009926	1.4132	1.4011	1.711	0.7748	yes	C06685	Antibiotics	Others	-	-	-	-	HMDB0250657	Organoheterocyclic compounds	Piperidines	Piperidinones	66-81-9	314.196	5.5471	M+CH3OH+H	C15H23NO4	0	79.4	pos
pos_268	LysoPC(0:0/18:2(9Z,12Z))	metab_1854	1.48e-10	6.63e-09	1.4131	1.4126	0.7941	-0.3326	yes	-	-	-	-	-	-	-	HMDB0061700	Lipids and lipid-like molecules	Glycerophospholipids	Glycerophosphocholines	27304-12-7	520.34	6.70287	M+H, M+Na, M+H-H2O	C26H50NO7P	0	76.5	pos
pos_499	Acetophenone, 4'-hydroxy-3'-methoxy-2-(2-piperidyl)-	metab_4394	0.0009743	0.001582	1.4124	1.4223	1.6369	0.7109	yes	-	-	-	-	-	-	-	HMDB0247917	Organic oxygen compounds	Organooxygen compounds	Carbonyl compounds	-	267.17	3.1052	M+H, M+NH4	C14H19NO3	0	36.1	pos
neg_6010	Leukotriene E4	metab_13304	0.0002239	0.0004336	1.412	1.4031	0.606	-0.7225	yes	C05952	Lipids	Eicosanoids	map00590;map01100;map04080;map04664	Arachidonic acid metabolism;Metabolic pathways;Neuroactive ligand-receptor interaction;Fc epsilon RI signaling pathway	Metabolism;Metabolism;Environmental Information Processing;Organismal Systems	Lipid metabolism;Global and overview maps;Signaling molecules and interaction;Immune system	LMFA03020075;HMDB0247369;PW_C001485;HMDB0002200;LMFA03020002	Lipids and lipid-like molecules	Fatty Acyls	Eicosanoids	75715-89-8	484.241	4.31257	M+FA-H	C23H37NO5S	0	76.7	neg
neg_6665	AFN911	metab_14026	6.53e-09	1.13e-07	1.4117	1.4136	0.6663	-0.5858	yes	-	-	-	-	-	-	-	HMDB0013863	Organoheterocyclic compounds	Diazines	Pyrimidines and pyrimidine derivatives	-	546.242	3.58013	M+Cl	C29H33N7O2	0	66	neg
pos_5382	Cyclo(Leu-Phe)	metab_4826	0.03466	0.04227	1.4114	1.4253	5.4671	2.4508	yes	C20519	-	-	-	-	-	-	HMDB0094673	Organic acids and derivatives	Carboxylic acids and derivatives	Amino acids, peptides, and analogues	-	261.159	5.48247	M+H	C15H20N2O2	0	83.1	pos
neg_1558	(5E,7E)-Undeca-2,5,7-trienedioylcarnitine	metab_8375	1.29e-05	3.71e-05	1.4111	1.4134	0.6359	-0.6532	yes	-	-	-	-	-	-	-	HMDB0241202	Lipids and lipid-like molecules	Fatty Acyls	Fatty acid esters	-	374.157	3.49345	M+Na-2H	C18H27NO6	0	36.5	neg
neg_5851	Phe-Phe-Pro-Arg	metab_13127	1.55e-05	4.35e-05	1.4108	1.417	0.6019	-0.7324	yes	-	-	-	-	-	-	-	HMDB0304807	Organic acids and derivatives	Carboxylic acids and derivatives	Amino acids, peptides, and analogues	-	546.278	4.52827	M-H2O-H	C29H39N7O5	0	63.5	neg
pos_2956	2-Ethyl-6-hydroxyhexanoic acid	metab_2159	0.001108	0.001778	1.4107	1.3991	1.6407	0.7143	yes	-	-	-	-	-	-	-	HMDB0245116	Organic acids and derivatives	Hydroxy acids and derivatives	Medium-chain hydroxy acids and derivatives	-	362.253	4.84107	2M+ACN+H	C8H16O3	0	37.3	pos
pos_3366	PA(8:0/i-16:0)	metab_2611	7.47e-06	2.12e-05	1.4106	1.4086	0.7101	-0.4938	yes	C00416	Lipids	Phospholipids	map01100;map00564;map01110;map00561;map05212;map05200;map04975;map04024;map05231;map04072;map04912;map04070;map04666	Metabolic pathways;Glycerophospholipid metabolism;Biosynthesis of secondary metabolites;Glycerolipid metabolism;Pancreatic cancer;Pathways in cancer;Fat digestion and absorption;cAMP signaling pathway;Choline metabolism in cancer;Phospholipase D signaling pathway;GnRH signaling pathway;Phosphatidylinositol signaling system;Fc gamma R-mediated phagocytosis	Metabolism;Metabolism;Metabolism;Metabolism;Human Diseases;Human Diseases;Organismal Systems;Environmental Information Processing;Human Diseases;Environmental Information Processing;Organismal Systems;Environmental Information Processing;Organismal Systems	Global and overview maps;Lipid metabolism;Global and overview maps;Lipid metabolism;Cancer: specific types;Cancer: overview;Digestive system;Signal transduction;Cancer: overview;Signal transduction;Endocrine system;Signal transduction;Immune system	HMDB0115689;PW_C064074	Lipids and lipid-like molecules	Glycerophospholipids	Glycerophosphates	-	559.341	6.0035	M+Na	C27H53O8P	0	33.4	pos
pos_3175	Uralenolide	metab_2403	3.64e-07	1.6e-06	1.41	1.4119	0.6404	-0.6429	yes	-	-	-	-	-	-	-	HMDB0038797	Lipids and lipid-like molecules	Steroids and steroid derivatives	Not Available	111150-27-7	513.299	5.50647	M+2Na-H	C30H44O4	0	47.5	pos
neg_4331	N-Linoleoyl Methionine	metab_11443	2.22e-09	5.49e-08	1.4082	1.4104	0.669	-0.5799	yes	-	-	-	-	-	-	-	HMDB0241981	Organic acids and derivatives	Carboxylic acids and derivatives	Amino acids, peptides, and analogues	-	410.274	6.58587	M-H	C23H41NO3S	0	31.2	neg
pos_5709	PS(15:0/PGJ2)	metab_5184	0.0008046	0.001333	1.408	1.4224	0.6015	-0.7333	yes	-	-	-	-	-	-	-	HMDB0281038	Not Available	Not Available	Not Available	-	411.729	4.82507	M+H+Na	C41H70NO12P	0	50.2	pos
pos_5195	Trandolaprilat	metab_4620	7.81e-07	3.04e-06	1.4074	1.4065	1.5113	0.5958	yes	C21515	-	-	-	-	-	-	HMDB0247506;PW_C040469;HMDB0060583	Organic acids and derivatives	Carboxylic acids and derivatives	Amino acids, peptides, and analogues	-	466.233	5.8758	M+ACN+Na	C22H30N2O5	0	44.1	pos
pos_1892	Oxypinnatanine	metab_987	3.51e-07	1.55e-06	1.4074	1.4089	0.6626	-0.5937	yes	-	-	-	-	-	-	-	HMDB0029403	Organic acids and derivatives	Carboxylic acids and derivatives	Amino acids, peptides, and analogues	52329-55-2	302.134	1.58963	M+ACN+H	C10H16N2O6	0	69.9	pos
neg_4925	Daucol	metab_12100	2.75e-07	1.73e-06	1.4071	1.4028	1.6386	0.7124	yes	C09652	-	-	-	-	-	-	HMDB0035287	Organoheterocyclic compounds	Oxanes	Not Available	887-08-1	275.14	5.89217	M+K-2H	C15H26O2	0	49.7	neg
pos_423	Enkephalin L	metab_3557	1.09e-05	2.95e-05	1.4069	1.4001	0.6462	-0.63	yes	-	-	-	-	-	-	-	HMDB0001045	Organic acids and derivatives	Carboxylic acids and derivatives	Amino acids, peptides, and analogues	14-18-6	556.273	2.72415	M+2H, M+H	C28H37N5O7	0	32.9	pos
neg_6000	Dmean	metab_13293	3.94e-07	2.3e-06	1.4069	1.4089	0.6546	-0.6113	yes	-	-	-	-	-	-	-	HMDB0251537	Benzenoids	Naphthalenes	Not Available	-	872.401	4.32042	3M-H	C18H17N3O	0	55.8	neg
pos_409	DG(PGF2alpha/2:0/0:0)	metab_3403	1.64e-07	8.37e-07	1.4062	1.4059	0.6878	-0.5398	yes	-	-	-	-	-	-	-	HMDB0296916	Not Available	Not Available	Not Available	-	471.293	2.62005	M+2H, M+H	C25H42O8	0	43	pos
pos_5190	3,11,12-Trihydroxy-1(10)-spirovetiven-2-one	metab_4615	0.001212	0.001926	1.4059	1.4034	1.7311	0.7917	yes	-	-	-	-	-	-	-	HMDB0038154	Lipids and lipid-like molecules	Prenol lipids	Sesquiterpenoids	84321-96-0	269.174	5.8838	M+H	C15H24O4	0	31.3	pos
neg_6573	(3S,4R,5R)-1,3,4,5,6-Pentahydroxy-1-morpholin-4-ylhexan-2-one	metab_13924	6.15e-09	1.09e-07	1.4053	1.4058	1.6484	0.721	yes	-	-	-	-	-	-	-	HMDB0243864	Organoheterocyclic compounds	Oxazinanes	Morpholines	-	246.099	3.67417	M-H2O-H	C10H19NO7	0	67.4	neg
neg_1293	Cymorcin diglucoside	metab_8082	5.66e-09	1.03e-07	1.4052	1.4067	0.6069	-0.7204	yes	-	-	-	-	-	-	-	HMDB0039386	Organic oxygen compounds	Organooxygen compounds	Carbohydrates and carbohydrate conjugates	-	471.184	3.18613	M-H2O-H	C22H34O12	0	34.1	neg
neg_5050	Gly-arg-gly-asp-ser	metab_12240	0.0003157	0.0005896	1.4051	1.4094	0.5611	-0.8337	yes	-	-	-	-	-	-	-	HMDB0252824	Organic acids and derivatives	Carboxylic acids and derivatives	Amino acids, peptides, and analogues	-	471.192	5.74655	M-H2O-H	C17H30N8O9	0	38.7	neg
neg_5551	16-Ketoestradiol	metab_12795	3.85e-05	9.39e-05	1.4048	1.4131	0.5461	-0.8727	yes	C14383	-	-	-	-	-	-	HMDB0000406;LMST02010047	Lipids and lipid-like molecules	Steroids and steroid derivatives	Estrane steroids	566-75-6	307.13	4.99305	M+Na-2H	C18H22O3	0	52.7	neg
neg_5572	Hydromorphone-3-sulphate	metab_12818	0.0006152	0.001073	1.4046	1.4168	0.5851	-0.7732	yes	-	-	-	-	-	-	-	HMDB0060825	Alkaloids and derivatives	Morphinans	Not Available	-	364.086	4.96698	M-H	C17H19NO6S	0	43.1	neg
pos_4982	Momilactone A	metab_4386	3.76e-07	1.64e-06	1.4043	1.4082	1.5433	0.626	yes	C18015	-	-	map01110;map00904	Biosynthesis of secondary metabolites;Diterpenoid biosynthesis	Metabolism;Metabolism	Global and overview maps;Metabolism of terpenoids and polyketides	LMPR0104080002;HMDB0036748	Phenylpropanoids and polyketides	2-arylbenzofuran flavonoids	Not Available	51415-07-7	359.16	6.07533	M+2Na-H	C20H26O3	0	30.7	pos
neg_5168	Eugenol O-[a-L-Arabinofuranosyl-(1->6)-b-D-glucopyranoside]	metab_12370	3.62e-09	7.63e-08	1.404	1.4059	0.6281	-0.671	yes	-	-	-	-	-	-	-	HMDB0037603	Organic oxygen compounds	Organooxygen compounds	Carbohydrates and carbohydrate conjugates	229333-98-6	493.147	5.5652	M+Cl	C21H30O11	0	31	neg
neg_6561	Deoxynivalenol	metab_13911	2.23e-09	5.5e-08	1.4033	1.4055	0.6641	-0.5904	yes	C09747	-	-	-	-	-	-	HMDB0036156	Lipids and lipid-like molecules	Prenol lipids	Sesquiterpenoids	51481-10-8	637.248	3.68263	2M+FA-H	C15H20O6	0	49.1	neg
pos_2452	Dihydrocaffeic acid 3-sulfate	metab_1605	5.68e-06	1.68e-05	1.4032	1.4062	0.6317	-0.6627	yes	-	-	-	-	-	-	-	HMDB0041721	Organic acids and derivatives	Organic sulfuric acids and derivatives	Arylsulfates	-	304.048	3.51208	M+ACN+H	C9H10O7S	0	59.5	pos
pos_181	Ser Ile His	metab_898	0.0002054	0.0003928	1.4026	1.3996	0.6708	-0.5761	yes	-	-	-	-	-	-	-	-	-	-	-	-	356.193	1.76557	M+2H, M+H, M+ACN+H	C15H25N5O5	66.4	0	pos
pos_3035	N-Methylschinifoline	metab_2248	3.66e-06	1.15e-05	1.4019	1.3956	1.6106	0.6876	yes	-	-	-	-	-	-	-	HMDB0040381	Organoheterocyclic compounds	Quinolines and derivatives	Quinolones and derivatives	149998-43-6	273.16	5.07375	M+NH4	C16H17NO2	0	36	pos
neg_5027	Cis-4-Hydroxycyclohexylacetic acid	metab_12214	0.0004573	0.0008226	1.4009	1.3868	1.6071	0.6845	yes	-	-	-	-	-	-	-	HMDB0000451	Organic oxygen compounds	Organooxygen compounds	Alcohols and polyols	68592-22-3	375.202	5.79305	2M+Hac-H	C8H14O3	0	37	neg
pos_5007	4-Methoxyestrone	metab_4415	7.81e-06	2.2e-05	1.4009	1.4008	1.4929	0.5782	yes	C03958	Hormones and transmitters	Peptide hormones	-	-	-	-	HMDB0060088	Organic acids and derivatives	Carboxylic acids and derivatives	Amino acids, peptides, and analogues	-	345.144	6.05937	M+2Na-H	C19H24O3	0	35	pos
pos_3164	PS(PGJ2/14:1(9Z))	metab_2391	7.7e-10	1.82e-08	1.3999	1.4014	0.6754	-0.5661	yes	-	-	-	-	-	-	-	HMDB0280935	Not Available	Not Available	Not Available	-	748.424	5.45847	M+H-2H2O	C40H66NO12P	0	55.2	pos
neg_4530	10,11-dihydro-20-trihydroxy-leukotriene B4	metab_11664	0.0001443	0.0002939	1.3999	1.4108	0.6898	-0.5357	yes	-	-	-	-	-	-	-	HMDB0012503;LMFA03020044	Lipids and lipid-like molecules	Fatty Acyls	Eicosanoids	-	385.223	6.3203	M-H	C20H34O7	0	73.6	neg
pos_7470	Zalcitabine	metab_7126	3.92e-07	1.7e-06	1.3998	1.3985	1.4841	0.5696	yes	C07207	-	-	map04976	Bile secretion	Organismal Systems	Digestive system	HMDB0015078;HMDB0255802;HMDB0037019;PW_C009386	Nucleosides, nucleotides, and analogues	Pyrimidine nucleosides	Pyrimidine 2'',3''-dideoxyribonucleosides	5718-77-4;7481-89-2	253.129	0.937883	M+ACN+H	C9H13N3O3	0	50.1	pos
pos_6770	Cynaroside A	metab_6358	4.43e-06	1.36e-05	1.3996	1.4014	0.6267	-0.6741	yes	-	-	-	-	-	-	-	HMDB0040532	Lipids and lipid-like molecules	Prenol lipids	Terpene lactones	117804-06-5	409.182	3.05703	M+H-2H2O	C21H32O10	0	82.2	pos
pos_1895	3''-deamino-3''-oxonicotianamine	metab_990	6.56e-10	1.64e-08	1.3996	1.4009	0.6573	-0.6054	yes	C15486	-	-	-	-	-	-	HMDB0304096	Organic acids and derivatives	Carboxylic acids and derivatives	Amino acids, peptides, and analogues	-	319.14	1.62155	M+NH4	C12H17N2O7-	0	54.5	pos
pos_3191	7alpha-hydroxy-3-oxochol-4-en-24-oic Acid	metab_2421	0.04474	0.05365	1.3993	1.3686	2.2765	1.1868	yes	-	-	-	-	-	-	-	HMDB0062744;LMST04010239	Lipids and lipid-like molecules	Steroids and steroid derivatives	Bile acids, alcohols and derivatives	14772-95-3	411.249	5.5471	M+Na	C24H36O4	0	69.5	pos
pos_4757	Pubescenol	metab_4137	0.001166	0.001857	1.3993	1.3872	1.5049	0.5897	yes	-	-	-	-	-	-	-	LMPR0104300001;HMDB0030085	Lipids and lipid-like molecules	Steroids and steroid derivatives	Steroid lactones	90685-93-1	507.331	6.28167	M+CH3OH+H	C28H42O6	0	55.1	pos
pos_5648	Melongoside P	metab_5117	1.15e-09	2.37e-08	1.399	1.4003	0.6687	-0.5806	yes	-	-	-	-	-	-	-	HMDB0030050	Lipids and lipid-like molecules	Steroids and steroid derivatives	Steroidal glycosides	98508-45-3	556.27	4.95373	M+2Na	C51H86O23	0	36.9	pos
neg_5169	Ampicilloyl	metab_12371	3.14e-09	7.08e-08	1.3988	1.4012	0.6445	-0.6337	yes	-	-	-	-	-	-	-	HMDB0248360	Organic acids and derivatives	Carboxylic acids and derivatives	Amino acids, peptides, and analogues	-	400.107	5.5652	M+Cl	C17H23N3O4S	0	39.2	neg
pos_1303	(9S,10E,12S,13S)-9,12,13-Trihydroxy-10-octadecenoic acid	metab_338	1.12e-05	3.01e-05	1.3986	1.3923	1.4055	0.491	yes	-	-	-	-	-	-	-	HMDB0038555	Lipids and lipid-like molecules	Fatty Acyls	Fatty acids and conjugates	97134-11-7	295.226	6.09132	M+H-2H2O, M+H	C18H34O5	0	47.5	pos
neg_4793	3-Methyl-2-(3-pyridyl)-1-indoleoctanoic acid	metab_11954	3.39e-06	1.24e-05	1.3984	1.3944	1.4542	0.5402	yes	-	-	-	-	-	-	-	HMDB0249870	Organoheterocyclic compounds	Indoles and derivatives	Indolyl carboxylic acids and derivatives	-	387.148	5.9627	M+K-2H	C22H26N2O2	0	36.7	neg
pos_2249	Levomefolic acid	metab_1381	3.32e-08	2.4e-07	1.3983	1.3996	0.6559	-0.6085	yes	C00440	-	-	map01100;map01200;map01120;map00720;map01523;map00670	Metabolic pathways;Carbon metabolism;Microbial metabolism in diverse environments;Carbon fixation pathways in prokaryotes;Antifolate resistance;One carbon pool by folate	Metabolism;Metabolism;Metabolism;Metabolism;Human Diseases;Metabolism	Global and overview maps;Global and overview maps;Global and overview maps;Energy metabolism;Drug resistance: antineoplastic;Metabolism of cofactors and vitamins	HMDB0254053;HMDB0001396	Organoheterocyclic compounds	Pteridines and derivatives	Pterins and derivatives	134-35-0	424.171	3.05703	M+H-2H2O	C20H25N7O6	0	35.5	pos
pos_1309	Sorbitan laurate	metab_344	0.0001818	0.000351	1.3982	1.3903	1.4163	0.5022	yes	-	-	-	-	-	-	-	LMFA07011017;HMDB0029885	Lipids and lipid-like molecules	Fatty Acyls	Fatty acid esters	1338-39-2	311.221	6.08332	M+H-2H2O, M+ACN+Na	C18H34O6	0	40	pos
neg_3232	CDP-DG(i-17:0/a-17:0)	metab_10227	2.65e-09	6.23e-08	1.398	1.4003	0.7148	-0.4843	yes	C00269	-	-	map01100;map00564;map01110;map04070	Metabolic pathways;Glycerophospholipid metabolism;Biosynthesis of secondary metabolites;Phosphatidylinositol signaling system	Metabolism;Metabolism;Metabolism;Environmental Information Processing	Global and overview maps;Lipid metabolism;Global and overview maps;Signal transduction	PW_C076580;HMDB0116244	Lipids and lipid-like molecules	Glycerophospholipids	CDP-glycerols	-	1002.53	6.1184	M+Na-2H	C46H85N3O15P2	0	30.5	neg
neg_1498	Asn Ile Ala Glu	metab_8309	9.26e-06	2.81e-05	1.3978	1.4014	0.6683	-0.5815	yes	-	-	-	-	-	-	-	-	-	-	-	-	444.21	3.42228	M-H	C18H31N5O8	38.7	0	neg
neg_4814	3-Hydroxykynurenamine	metab_11978	0.0001041	0.0002204	1.3975	1.3895	1.6749	0.744	yes	C05636	-	-	map00380	Tryptophan metabolism	Metabolism	Amino acid metabolism	HMDB0060281	Organic oxygen compounds	Organooxygen compounds	Carbonyl compounds	-	359.171	5.95487	2M-H	C9H12N2O2	0	31.8	neg
neg_467	N-Linoleoyl Phenylalanine	metab_11817	3.42e-07	2.06e-06	1.3975	1.4016	0.7225	-0.4689	yes	-	-	-	-	-	-	-	HMDB0241982	Organic acids and derivatives	Carboxylic acids and derivatives	Amino acids, peptides, and analogues	-	426.301	6.6328	M-H, M+Cl	C27H41NO3	0	62.4	neg
neg_5981	Glutamyltryptophan	metab_13270	3.97e-05	9.63e-05	1.3971	1.4006	0.5873	-0.7678	yes	-	-	-	-	-	-	-	HMDB0028830	Organic acids and derivatives	Carboxylic acids and derivatives	Amino acids, peptides, and analogues	38101-59-6	332.125	4.35957	M-H	C16H19N3O5	0	45.7	neg
pos_2049	Dermatan L-iduronate	metab_7711	4.48e-08	2.99e-07	1.3958	1.3929	1.5403	0.6232	yes	C01490	-	-	map01100;map00532	Metabolic pathways;Glycosaminoglycan biosynthesis - chondroitin sulfate / dermatan sulfate	Metabolism;Metabolism	Global and overview maps;Glycan biosynthesis and metabolism	HMDB0060470;HMDB0000632	Organic oxygen compounds	Organooxygen compounds	Carbohydrates and carbohydrate conjugates	24967-94-0	410.167	2.66798	M+H	C16H27NO11	0	86.7	pos
pos_4784	Dehydrocholic Acid	metab_4167	1.43e-06	5.07e-06	1.3957	1.3961	1.4314	0.5175	yes	C13154	-	-	-	-	-	-	LMST04010106;MJDBOTE0000546	-	-	-	81-23-2	385.237	6.24985	M+H-H2O	C24H34O5	59.7	0	pos
neg_4716	18-HEPE	metab_11869	0.0002026	0.0003954	1.3947	1.396	1.611	0.688	yes	C18177	-	-	-	-	-	-	HMDB0062222;HMDB0012611	Lipids and lipid-like molecules	Fatty Acyls	Eicosanoids	-	363.218	6.04047	M+FA-H	C20H30O3	51.3	0	neg
pos_4856	Antroquinonol	metab_4246	2.12e-08	1.74e-07	1.3938	1.3948	1.3601	0.4437	yes	-	-	-	-	-	-	-	HMDB0248495	Lipids and lipid-like molecules	Prenol lipids	Diterpenoids	-	413.266	6.1868	M+Na	C24H38O4	0	30.1	pos
neg_286	3-Methoxytyramine	metab_9816	0.0001073	0.0002259	1.3935	1.3931	0.6256	-0.6767	yes	C05587	-	-	map01100;map01063;map00965;map00350;map04728	Metabolic pathways;Biosynthesis of alkaloids derived from shikimate pathway;Betalain biosynthesis;Tyrosine metabolism;Dopaminergic synapse	Metabolism;Metabolism;Metabolism;Metabolism;Organismal Systems	Global and overview maps;Chemical structure transformation maps;Biosynthesis of other secondary metabolites;Amino acid metabolism;Nervous system	PW_C000015;HMDB0259535;HMDB0000022	Benzenoids	Phenols	Benzenediols	554-52-9	500.273	4.65618	M-H2O-H, 3M-H	C9H13NO2	0	51.4	neg
neg_1547	2'',6''-O-Diacetyloninin	metab_8363	5.41e-09	9.87e-08	1.3928	1.3944	0.6421	-0.6391	yes	-	-	-	-	-	-	-	HMDB0302015	Organoheterocyclic compounds	Pteridines and derivatives	Not Available	-	461.189	3.47777	2M+FA-H	C9H12N4O2	0	49.6	neg
neg_4632	Chenodeoxycholyltaurine	metab_11777	4.36e-08	4.23e-07	1.3918	1.3951	0.7151	-0.4838	yes	C05465	-	-	map04976;map04979;map00121;map00120	Bile secretion;Cholesterol metabolism;Secondary bile acid biosynthesis;Primary bile acid biosynthesis	Organismal Systems;Organismal Systems;Metabolism;Metabolism	Digestive system;Digestive system;Lipid metabolism;Lipid metabolism	HMDB0000951;HMDB0242411;HMDB0000949	Lipids and lipid-like molecules	Steroids and steroid derivatives	Bile acids, alcohols and derivatives	516-35-8;53-02-1	997.587	6.1649	2M-H	C26H45NO6S	0	74.6	neg
neg_1993	8-Amino-7-oxononanoic acid	metab_8858	1.42e-07	1.04e-06	1.3917	1.3929	1.682	0.7502	yes	C01092	-	-	map01100;map00780;map01240	Metabolic pathways;Biotin metabolism;Biosynthesis of cofactors	Metabolism;Metabolism;Metabolism	Global and overview maps;Metabolism of cofactors and vitamins;Global and overview maps	LMFA01060168;HMDB0240687	Lipids and lipid-like molecules	Fatty Acyls	Fatty acids and conjugates	682799-71-9	232.119	4.06052	M+FA-H	C9H17NO3	0	43.3	neg
neg_7384	Gamma-Glutamylglutamine	metab_14819	2.98e-06	1.12e-05	1.3913	1.3967	0.6612	-0.5968	yes	C05283	-	-	-	-	-	-	HMDB0029147;HMDB0011738	Organic acids and derivatives	Carboxylic acids and derivatives	Amino acids, peptides, and analogues	1466-50-8;10148-81-9	274.104	0.961717	M-H	C10H17N3O6	77.7	0	neg
neg_1787	Dodeca-4,7,10-trienedioylcarnitine	metab_8629	2.09e-06	8.35e-06	1.391	1.3949	0.6537	-0.6133	yes	-	-	-	-	-	-	-	HMDB0241281	Lipids and lipid-like molecules	Fatty Acyls	Fatty acid esters	-	388.173	3.78517	M+Na-2H	C19H29NO6	0	35.5	neg
pos_5367	2beta-Hydroxytestosterone	metab_4809	0.0002235	0.0004232	1.3907	1.3855	1.6352	0.7095	yes	C00550	Lipids	Phospholipids	map00600;map01100;map04071;map04217	Sphingolipid metabolism;Metabolic pathways;Sphingolipid signaling pathway;Necroptosis	Metabolism;Metabolism;Environmental Information Processing;Cellular Processes	Lipid metabolism;Global and overview maps;Signal transduction;Cell growth and death	HMDB0012654	Lipids and lipid-like molecules	Sphingolipids	Phosphosphingolipids	10390-14-4	349.175	5.53112	M+2Na-H	C19H28O3	0	67.9	pos
pos_3868	Aminophenazone	metab_3157	2.78e-09	4.24e-08	1.39	1.3936	0.6794	-0.5577	yes	C07539	-	-	-	-	-	-	HMDB0015493	Organoheterocyclic compounds	Azoles	Pyrazoles	58-15-1	504.307	7.72757	2M+ACN+H	C13H17N3O	0	49.2	pos
pos_7651	Lysyl-Lysine	metab_7327	5.96e-05	0.0001302	1.3897	1.3913	0.6345	-0.6562	yes	-	-	-	-	-	-	-	HMDB0028956;HMDB0304785	Organic acids and derivatives	Carboxylic acids and derivatives	Amino acids, peptides, and analogues	13184-13-9	138.108	0.7323	M+2H	C12H26N4O3	0	33.8	pos
pos_5377	N2-Fructopyranosylarginine	metab_4820	2.46e-07	1.15e-06	1.3894	1.3855	1.5233	0.6072	yes	-	-	-	-	-	-	-	HMDB0041541	Organic acids and derivatives	Carboxylic acids and derivatives	Amino acids, peptides, and analogues	162966-07-6	354.201	5.49047	M+NH4	C12H24N4O7	0	34.3	pos
pos_6562	Santamarin	metab_6129	1.03e-05	2.8e-05	1.3892	1.39	0.6723	-0.5728	yes	C09544	-	-	-	-	-	-	HMDB0302709	Lipids and lipid-like molecules	Prenol lipids	Terpene lactones	4290-13-5	293.113	3.33638	M+2Na-H	C15H20O3	0	40.4	pos
neg_4501	13'-Carboxy-gamma-tocopherol	metab_11632	2.91e-10	1.63e-08	1.3889	1.389	1.4569	0.5429	yes	-	-	-	-	-	-	-	HMDB0012557	Lipids and lipid-like molecules	Prenol lipids	Quinone and hydroquinone lipids	-	491.338	6.35927	M+FA-H	C28H46O4	0	37.2	neg
pos_3080	N1,N5,N10-Tris-trans-p-coumaroylspermine	metab_2298	2.93e-10	9.91e-09	1.3886	1.3909	0.6669	-0.5844	yes	-	-	-	-	-	-	-	HMDB0039962	Phenylpropanoids and polyketides	Cinnamic acids and derivatives	Hydroxycinnamic acids and derivatives	-	623.319	5.21777	M+H-H2O	C37H44N4O6	0	49.9	pos
neg_5107	Butanedioic acid, octenyl-	metab_12303	0.000492	0.0008815	1.3886	1.3758	1.6298	0.7047	yes	-	-	-	-	-	-	-	HMDB0249455	Lipids and lipid-like molecules	Fatty Acyls	Fatty acid esters	-	273.134	5.66178	M+FA-H	C12H20O4	0	53.5	neg
neg_3016	N-Eicosapentaenoyl Glutamic acid	metab_9989	2.69e-08	2.97e-07	1.388	1.3867	1.5845	0.664	yes	-	-	-	-	-	-	-	HMDB0242070	Not Available	Not Available	Not Available	-	466.234	5.83668	M+Cl	C25H37NO5	0	52	neg
pos_228	LysoPC(22:6(4Z,7Z,10Z,13Z,16Z,19Z)/0:0)	metab_1414	1.95e-09	3.31e-08	1.3875	1.387	0.7703	-0.3766	yes	C04230	Lipids	Phospholipids	map00564;map05231	Glycerophospholipid metabolism;Choline metabolism in cancer	Metabolism;Human Diseases	Lipid metabolism;Cancer: overview	HMDB0010404	Lipids and lipid-like molecules	Glycerophospholipids	Glycerophosphocholines	162440-05-3	568.339	6.59177	M+H, M+Na, M+H-H2O	C30H50NO7P	0	74.5	pos
pos_6042	Blumenol C O-[apiosyl-(1->6)-glucoside]	metab_5554	4.88e-10	1.35e-08	1.3869	1.3896	0.6573	-0.6054	yes	-	-	-	-	-	-	-	HMDB0031936	Lipids and lipid-like molecules	Fatty Acyls	Fatty acyl glycosides	177261-68-6	522.292	4.14067	M+NH4	C24H40O11	0	45.1	pos
pos_144	(6R,8Z)-6-Hydroxy-3-oxotetradecenoic acid	metab_489	0.000474	0.0008243	1.3865	1.3745	1.4807	0.5663	yes	-	-	-	-	-	-	-	HMDB0062363	Lipids and lipid-like molecules	Fatty Acyls	Fatty acids and conjugates	-	530.369	6.06733	M+H-H2O, M+H, 2M+NH4	C14H24O4	0	44	pos
neg_423	Auxin a	metab_11331	2.01e-07	1.35e-06	1.3865	1.3824	1.4877	0.5731	yes	-	-	-	-	-	-	-	HMDB0038483	Lipids and lipid-like molecules	Prenol lipids	Monoterpenoids	-	349.202	6.15708	M-H, M+Na-2H	C18H32O5	0	42.8	neg
neg_6274	LysoPE(0:0/22:6(4Z,7Z,10Z,13Z,16Z,19Z))	metab_13593	1.09e-07	8.52e-07	1.3864	1.388	0.6502	-0.6211	yes	-	-	-	-	-	-	-	HMDB0011496	Lipids and lipid-like molecules	Glycerophospholipids	Glycerophosphoethanolamines	-	562.237	3.99718	M+K-2H	C27H44NO7P	0	40.1	neg
pos_1508	Glu Ile Ser	metab_565	3.27e-05	7.65e-05	1.3861	1.3891	0.6944	-0.5261	yes	-	-	-	-	-	-	-	-	-	-	-	-	348.176	2.96935	M+H, M+ACN+H	C14H25N3O7	65.8	0	pos
pos_5226	L-3-Phenyllactic acid	metab_4654	4.07e-05	9.3e-05	1.3842	1.3921	0.6603	-0.5988	yes	C05607	-	-	map01100;map00960;map00360;map01064	Metabolic pathways;Tropane, piperidine and pyridine alkaloid biosynthesis;Phenylalanine metabolism;Biosynthesis of alkaloids derived from ornithine, lysine and nicotinic acid	Metabolism;Metabolism;Metabolism;Metabolism	Global and overview maps;Biosynthesis of other secondary metabolites;Amino acid metabolism;Chemical structure transformation maps	HMDB0000748;HMDB0000563	Phenylpropanoids and polyketides	Phenylpropanoic acids	Not Available	20312-36-1;7326-19-4	350.16	5.81998	2M+NH4	C9H10O3	0	39.3	pos
pos_5290	Iloprost R-isomer	metab_4724	5.14e-08	3.34e-07	1.384	1.3832	1.4441	0.5301	yes	-	-	-	-	-	-	-	HMDB0259545	Lipids and lipid-like molecules	Fatty Acyls	Eicosanoids	-	399.192	5.69948	M+K	C22H32O4	0	51.8	pos
neg_4875	Undecylenic acid	metab_12045	3.96e-06	1.4e-05	1.384	1.3792	1.582	0.6618	yes	C13910	-	-	-	-	-	-	LMFA01030036;HMDB0033724	Lipids and lipid-like molecules	Fatty Acyls	Fatty acids and conjugates	112-38-9	229.144	5.92348	M+FA-H	C11H20O2	0	56.8	neg
pos_7524	Glycerylphosphorylcholine	metab_7186	0.0005723	0.0009754	1.384	1.3737	0.6912	-0.5329	yes	C00670	-	-	map00565;map00564;map05231	Ether lipid metabolism;Glycerophospholipid metabolism;Choline metabolism in cancer	Metabolism;Metabolism;Human Diseases	Lipid metabolism;Lipid metabolism;Cancer: overview	HMDB0000086;HMDB0252858	Lipids and lipid-like molecules	Glycerophospholipids	Glycerophosphocholines	28319-77-9	280.092	0.859383	M+Na	C8H20NO6P	0	54.8	pos
neg_5800	1-Ipomeanol	metab_13071	2.24e-06	8.84e-06	1.3839	1.3774	1.7119	0.7756	yes	-	-	-	-	-	-	-	HMDB0030473	Organoheterocyclic compounds	Heteroaromatic compounds	Not Available	34435-70-6	213.076	4.60472	M+FA-H	C9H12O3	0	39.1	neg
neg_1164	Glutaminylproline	metab_7939	8.87e-05	0.0001922	1.3835	1.3904	0.643	-0.6372	yes	-	-	-	-	-	-	-	HMDB0028805	Organic acids and derivatives	Carboxylic acids and derivatives	Amino acids, peptides, and analogues	139370-58-4	288.12	1.69075	M+FA-H	C10H17N3O4	0	55.5	neg
pos_7385	S-Adenosylmethionine	metab_7035	9.14e-06	2.53e-05	1.3834	1.3819	0.6904	-0.5345	yes	C00019	Vitamins and cofactors	Cofactors	map01100;map01110;map00908;map00270;map01240;map00330;map01230;map05208;map00261;map04122;map01070;map01060	Metabolic pathways;Biosynthesis of secondary metabolites;Zeatin biosynthesis;Cysteine and methionine metabolism;Biosynthesis of cofactors;Arginine and proline metabolism;Biosynthesis of amino acids;Chemical carcinogenesis - reactive oxygen species;Monobactam biosynthesis;Sulfur relay system;Biosynthesis of plant hormones;Biosynthesis of plant secondary metabolites	Metabolism;Metabolism;Metabolism;Metabolism;Metabolism;Metabolism;Metabolism;Human Diseases;Metabolism;Genetic Information Processing;Metabolism;Metabolism	Global and overview maps;Global and overview maps;Metabolism of terpenoids and polyketides;Amino acid metabolism;Global and overview maps;Amino acid metabolism;Global and overview maps;Cancer: overview;Biosynthesis of other secondary metabolites;Folding, sorting and degradation;Chemical structure transformation maps;Chemical structure transformation maps	HMDB0001185;PW_C000921	Nucleosides, nucleotides, and analogues	5''-deoxyribonucleosides	5''-deoxy-5''-thionucleosides	485-80-3;29908-03-0	364.135	1.26265	M+H-2H2O	C15H23N6O5S+	0	82	pos
pos_257	PC(18:1(6Z)/0:0)	metab_1735	3.61e-06	1.14e-05	1.383	1.3769	0.7567	-0.4022	yes	-	-	-	-	-	-	-	HMDB0256159;LMGP01050029	Lipids and lipid-like molecules	Glycerophospholipids	Glycerophosphocholines	-	522.356	7.73553	M+K, M+2Na-H, M+H	C26H52NO7P	0	56.7	pos
pos_2031	Val Glu Glu	metab_1143	5.41e-05	0.0001194	1.3829	1.3926	0.6779	-0.5608	yes	-	-	-	-	-	-	-	-	-	-	-	-	376.171	2.62005	M+H	C15H25N3O8	83.7	0	pos
neg_2411	DHAP(10:0)	metab_9320	0.001626	0.00256	1.3828	1.3722	0.5272	-0.9236	yes	-	-	-	-	-	-	-	HMDB0011675	Organic oxygen compounds	Organooxygen compounds	Carbonyl compounds	-	323.128	4.74325	M-H	C13H25O7P	0	44.6	neg
pos_5176	Integerrimine	metab_4599	5.56e-10	1.47e-08	1.3827	1.3836	1.5584	0.64	yes	C10328	-	-	-	-	-	-	HMDB0242680	Phenylpropanoids and polyketides	Macrolides and analogues	Not Available	480-79-5	399.191	5.8998	M+ACN+Na	C18H25NO5	0	86.4	pos
neg_4830	10-hydroxy-11S,12S-epoxy-5Z,8Z,14Z-eicosatrienoic acid	metab_11996	1.01e-07	7.96e-07	1.3823	1.383	1.3831	0.4679	yes	C14810	-	-	map00590	Arachidonic acid metabolism	Metabolism	Lipid metabolism	HMDB0062479;LMFA03090003	Lipids and lipid-like molecules	Fatty Acyls	Eicosanoids	-	381.228	5.94705	M+FA-H	C20H32O4	0	32.6	neg
neg_6394	Prolyl-Alanine	metab_13726	1.93e-07	1.31e-06	1.3821	1.3822	0.6478	-0.6264	yes	-	-	-	-	-	-	-	HMDB0029010	Organic acids and derivatives	Carboxylic acids and derivatives	Amino acids, peptides, and analogues	-	431.214	3.87193	2M+Hac-H	C8H14N2O3	0	52.3	neg
neg_2561	4-Hydroxy-3,6,9-Trimethyl-3,3a,4,5,9a,9b-hexahydroazuleno[4,5-b]furan-2,7-Dione	metab_9486	2.5e-09	5.91e-08	1.3821	1.381	1.4942	0.5794	yes	-	-	-	-	-	-	-	-	-	-	-	-	243.102	5.0239	M-H2O-H	C15H18O4	53.9	0	neg
neg_2318	Seglitide	metab_9218	7.38e-09	1.22e-07	1.3816	1.3834	0.6635	-0.5918	yes	-	-	-	-	-	-	-	HMDB0258209	Organic acids and derivatives	Carboxylic acids and derivatives	Amino acids, peptides, and analogues	-	853.418	4.56745	M+FA-H	C44H56N8O7	0	69.6	neg
pos_98	5-Hydroxyindoleacetic acid	metab_7672	3.58e-10	1.11e-08	1.381	1.3785	1.4116	0.4973	yes	C05635	-	-	map01100;map04726;map00380	Metabolic pathways;Serotonergic synapse;Tryptophan metabolism	Metabolism;Organismal Systems;Metabolism	Global and overview maps;Nervous system;Amino acid metabolism	PW_C000609;HMDB0000763	Organoheterocyclic compounds	Indoles and derivatives	Indolyl carboxylic acids and derivatives	54-16-0	192.065	4.3746	M+H, M+Na, M+H-H2O	C10H9NO3	91.5	0	pos
pos_6230	Asp Trp	metab_5763	3.1e-11	2.24e-09	1.3808	1.3797	0.6224	-0.6841	yes	-	-	-	-	-	-	-	-	-	-	-	-	320.124	3.84197	M+H	C15H17N3O5	80.9	0	pos
neg_2438	Phenylbutyrylglutamine	metab_9349	7.38e-06	2.33e-05	1.3801	1.374	1.4367	0.5227	yes	-	-	-	-	-	-	-	HMDB0011687	Organic acids and derivatives	Carboxylic acids and derivatives	Amino acids, peptides, and analogues	-	327.112	4.79582	M+Cl	C15H20N2O4	0	38.5	neg
neg_2138	L-Proline, 1-(1-L-leucyl-L-prolyl)-	metab_9019	9.55e-06	2.87e-05	1.3801	1.3767	0.6498	-0.622	yes	-	-	-	-	-	-	-	HMDB0253022	Organic acids and derivatives	Carboxylic acids and derivatives	Amino acids, peptides, and analogues	-	324.193	4.24918	M-H	C16H27N3O4	0	48	neg
pos_4569	Ponasterone A	metab_3932	1.17e-05	3.12e-05	1.3799	1.3793	1.4081	0.4938	yes	C08835	-	-	-	-	-	-	HMDB0256697;LMST01010195	Lipids and lipid-like molecules	Steroids and steroid derivatives	Bile acids, alcohols and derivatives	13408-56-5	447.308	6.5361	M+H-H2O	C27H44O6	0	63	pos
pos_3660	Doxercalciferol	metab_2931	5.4e-11	3.34e-09	1.3799	1.3808	1.3055	0.3846	yes	C08211	-	-	-	-	-	-	HMDB0251601;LMST03010069	Lipids and lipid-like molecules	Steroids and steroid derivatives	Vitamin D and derivatives	54573-75-0	445.367	6.82223	M+CH3OH+H	C28H44O2	0	66.3	pos
pos_934	9,10-Epoxyoctadecenoic acid	metab_7622	7.15e-06	2.04e-05	1.3799	1.3743	1.4698	0.5556	yes	C14825	-	-	map01100;map00591	Metabolic pathways;Linoleic acid metabolism	Metabolism;Metabolism	Global and overview maps;Lipid metabolism	HMDB0004701	Lipids and lipid-like molecules	Fatty Acyls	Fatty acids and conjugates	-	297.242	6.59972	M+H, M+Na	C18H32O3	0	47.1	pos
neg_4882	Papaverrubine B	metab_12052	0.04282	0.05185	1.3794	1.3658	0.2767	-1.8538	yes	-	-	-	-	-	-	-	HMDB0030169	Alkaloids and derivatives	Rhoeadine alkaloids	Not Available	5140-39-6	384.149	5.91565	M-H	C21H23NO6	0	47.4	neg
pos_1277	Bisnorcholic acid	metab_308	2.87e-07	1.31e-06	1.3791	1.3769	1.3826	0.4673	yes	-	-	-	-	-	-	-	HMDB0002082;LMST04050005	Lipids and lipid-like molecules	Steroids and steroid derivatives	Bile acids, alcohols and derivatives	-	403.247	6.1152	M+H, M+Na	C22H36O5	0	57.3	pos
neg_6729	Gibberellin A32	metab_14097	1.41e-07	1.04e-06	1.3779	1.3776	1.5448	0.6274	yes	-	-	-	-	-	-	-	HMDB0035037	Lipids and lipid-like molecules	Prenol lipids	Diterpenoids	32165-30-3	415.082	3.51745	M+K-2H	C19H22O8	0	52.7	neg
pos_5878	Hordatine A	metab_5370	0.001411	0.002214	1.3779	1.3967	0.493	-1.0204	yes	C08307	-	-	-	-	-	-	HMDB0030461	Phenylpropanoids and polyketides	2-arylbenzofuran flavonoids	Not Available	7073-64-5	531.277	4.4632	M+H-2H2O	C28H38N8O5	0	39.6	pos
neg_6705	2-((5-(Diethylamino)-[1,2,4]triazolo[1,5-a]pyrimidin-7-yl)(hexyl)amino)ethanol	metab_14071	0.0003549	0.0006545	1.3777	1.3638	0.6337	-0.6581	yes	-	-	-	-	-	-	-	HMDB0244283	Organoheterocyclic compounds	Triazolopyrimidines	Not Available	-	371.194	3.54097	M+K-2H	C17H30N6O	0	31.1	neg
pos_3192	Cadabicine	metab_2422	8.86e-09	9.5e-08	1.3771	1.3743	1.3597	0.4433	yes	-	-	-	-	-	-	-	HMDB0033451	Organic oxygen compounds	Organooxygen compounds	Ethers	99964-83-7	468.249	5.5471	M+CH3OH+H	C25H29N3O4	0	79.5	pos
neg_1898	Methylphenobarbital	metab_8752	0.04246	0.05145	1.3766	1.3597	6.4799	2.696	yes	C07829	-	-	-	-	-	-	HMDB0014987	Organoheterocyclic compounds	Diazines	Pyrimidines and pyrimidine derivatives	115-38-8	283.049	3.9267	M+K-2H	C13H14N2O3	0	48.2	neg
neg_4311	1-(11Z,14Z-eicosadienoyl)-glycero-3-phosphate	metab_11421	3.06e-07	1.88e-06	1.3763	1.3727	0.7516	-0.4119	yes	-	-	-	-	-	-	-	HMDB0062303;LMGP10050027;HMDB0114758	Lipids and lipid-like molecules	Glycerophospholipids	Glycerophosphates	-	507.273	6.60933	M+FA-H	C23H43O7P	0	54.9	neg
pos_5091	Clomipramine	metab_4505	5.92e-07	2.4e-06	1.3763	1.3771	1.5208	0.6048	yes	C06918	-	-	-	-	-	-	PW_C009649;HMDB0015372	Organoheterocyclic compounds	Benzazepines	Dibenzazepines	303-49-1	332.188	5.98768	M+NH4	C19H23ClN2	53.2	0	pos
neg_1512	Formycin b	metab_8326	5.45e-05	0.000126	1.3763	1.3779	1.6278	0.7029	yes	-	-	-	-	-	-	-	HMDB0252449	Organic oxygen compounds	Organooxygen compounds	Carbohydrates and carbohydrate conjugates	-	249.063	3.43858	M-H2O-H	C10H12N4O5	0	44.9	neg
pos_6082	4-Formylaminoantipyrine	metab_5598	5.79e-08	3.63e-07	1.3757	1.3758	1.6007	0.6787	yes	-	-	-	-	-	-	-	HMDB0246429	Organoheterocyclic compounds	Azoles	Pyrazoles	-	249.134	4.08397	M+NH4	C12H13N3O2	63.6	0	pos
pos_612	Val Leu Ser Pro Ala	metab_5640	2.57e-07	1.2e-06	1.3756	1.3712	0.7195	-0.475	yes	-	-	-	-	-	-	-	-	-	-	-	-	486.292	3.84197	M+H, M+Na	C22H39N5O7	32	0	pos
neg_2650	N1,N10-Dicoumaroylspermidine	metab_9585	5.56e-08	5.11e-07	1.3754	1.3704	0.7062	-0.5019	yes	-	-	-	-	-	-	-	HMDB0033469	Phenylpropanoids and polyketides	Cinnamic acids and derivatives	Hydroxycinnamic acids and derivatives	65715-79-9	436.224	5.176	M-H	C25H31N3O4	0	86	neg
pos_2772	Micronomicin	metab_1957	2.45e-07	1.15e-06	1.375	1.376	0.6444	-0.634	yes	-	-	-	-	-	-	-	HMDB0254707	Organic oxygen compounds	Organooxygen compounds	Carbohydrates and carbohydrate conjugates	-	527.319	4.29402	M+ACN+Na	C20H41N5O7	0	70.2	pos
neg_6909	Skepinone-L	metab_14296	0.0007365	0.001258	1.3746	1.3937	0.5908	-0.7593	yes	-	-	-	-	-	-	-	HMDB0258326	Benzenoids	Dibenzocycloheptenes	Not Available	-	406.129	3.34393	M-H2O-H	C24H21F2NO4	0	54	neg
neg_5973	Dynasore	metab_13261	3.2e-06	1.18e-05	1.3745	1.3673	1.6912	0.7581	yes	-	-	-	-	-	-	-	HMDB0251652	Benzenoids	Naphthalenes	Naphthalenecarboxylic acids and derivatives	-	343.071	4.36738	M+Na-2H	C18H14N2O4	0	46.4	neg
neg_2332	S-adenosyl-L-methioninamine	metab_9234	0.006563	0.009131	1.3742	1.372	2.0219	1.0157	yes	C01137	Peptides	Amines	map01100;map00270;map00330	Metabolic pathways;Cysteine and methionine metabolism;Arginine and proline metabolism	Metabolism;Metabolism;Metabolism	Global and overview maps;Amino acid metabolism;Amino acid metabolism	HMDB0304476;HMDB0000988	Nucleosides, nucleotides, and analogues	5''-deoxyribonucleosides	5''-deoxy-5''-thionucleosides	22365-13-5	377.138	4.59687	M+Na-2H	C14H24N6O3S+2	0	48.7	neg
neg_5223	Phaseic acid	metab_12432	0.0002827	0.0005354	1.374	1.3741	1.7272	0.7884	yes	C09707	-	-	map00906	Carotenoid biosynthesis	Metabolism	Metabolism of terpenoids and polyketides	HMDB0302844	Lipids and lipid-like molecules	Prenol lipids	Sesquiterpenoids	24394-14-7	279.124	5.48687	M-H	C15H20O5	0	63.1	neg
neg_746	Sulfolithocholic acid	metab_14902	1.88e-07	1.28e-06	1.3739	1.3759	0.6496	-0.6224	yes	-	-	-	-	-	-	-	LMST05020015;HMDB0000907	Lipids and lipid-like molecules	Steroids and steroid derivatives	Bile acids, alcohols and derivatives	34669-57-3	455.251	4.02917	M-H, M+Cl	C24H40O6S	0	30.5	neg
pos_5475	6-Dehydrotestosterone glucuronide	metab_4927	0.0002522	0.0004701	1.3736	1.3795	0.627	-0.6734	yes	C00178	Nucleic acids	Bases	map00240;map01100	Pyrimidine metabolism;Metabolic pathways	Metabolism;Metabolism	Nucleotide metabolism;Global and overview maps	HMDB0010337	Organoheterocyclic compounds	Diazines	Pyrimidines and pyrimidine derivatives	-	427.208	5.29777	M+H-2H2O	C25H34O8	0	51.5	pos
pos_4892	3alpha,7alpha,12alpha,24(S)-tetrahydroxy-5beta-cholestan-27-al	metab_4286	2.26e-06	7.54e-06	1.3732	1.376	1.4334	0.5194	yes	-	-	-	-	-	-	-	HMDB0062206	Lipids and lipid-like molecules	Steroids and steroid derivatives	Bile acids, alcohols and derivatives	-	468.368	6.13907	M+NH4	C27H46O5	0	48.6	pos
neg_2423	Cenisertib	metab_9333	8.21e-09	1.33e-07	1.373	1.3744	0.615	-0.7012	yes	-	-	-	-	-	-	-	HMDB0249799	Organoheterocyclic compounds	Diazinanes	Piperazines	-	472.224	4.76547	M+Na-2H	C24H30FN7O	0	38.9	neg
pos_2498	Trp Val Asp	metab_1655	2.49e-07	1.17e-06	1.3722	1.3783	0.661	-0.5972	yes	-	-	-	-	-	-	-	-	-	-	-	-	419.193	3.6092	M+H	C20H26N4O6	62.1	0	pos
pos_3223	N-Eicosapentaenoyl Methionine	metab_2456	6.91e-08	4.17e-07	1.372	1.3692	1.4689	0.5547	yes	-	-	-	-	-	-	-	HMDB0242076	Not Available	Not Available	Not Available	-	416.264	5.67548	M+H-H2O	C25H39NO3S	0	60.1	pos
pos_2591	Niazidin	metab_1759	1.98e-09	3.35e-08	1.3717	1.3689	1.5652	0.6463	yes	-	-	-	-	-	-	-	HMDB0031981	Not Available	Not Available	Not Available	198969-42-5	387.122	3.82597	M+CH3OH+H	C15H18N2O6S	0	36.7	pos
neg_5814	Phenylalanylhydroxyproline	metab_13086	0.0001584	0.0003183	1.3711	1.3629	1.6669	0.7372	yes	-	-	-	-	-	-	-	HMDB0011176	Organic acids and derivatives	Carboxylic acids and derivatives	Amino acids, peptides, and analogues	90965-82-5	313.096	4.58903	M+Cl	C14H18N2O4	0	54.7	neg
neg_2099	Nivalenol	metab_8975	8.23e-10	2.84e-08	1.3692	1.3675	1.5031	0.5879	yes	C06080	-	-	map00909	Sesquiterpenoid and triterpenoid biosynthesis	Metabolism	Metabolism of terpenoids and polyketides	HMDB0004304	Lipids and lipid-like molecules	Prenol lipids	Sesquiterpenoids	23282-20-4	293.1	4.19432	M-H2O-H	C15H20O7	0	61.2	neg
neg_6533	Physangulide	metab_13880	4.72e-06	1.62e-05	1.3678	1.3752	0.6162	-0.6985	yes	-	-	-	-	-	-	-	HMDB0037381	Lipids and lipid-like molecules	Steroids and steroid derivatives	Steroid lactones	131749-58-1	557.257	3.714	M+Cl	C28H42O9	0	43.2	neg
neg_2763	Ketotrexate	metab_9709	3.93e-05	9.56e-05	1.3677	1.359	0.6544	-0.6118	yes	-	-	-	-	-	-	-	HMDB0253793	Organic acids and derivatives	Carboxylic acids and derivatives	Amino acids, peptides, and analogues	-	518.204	5.35013	M+FA-H	C21H27N7O6	0	30.9	neg
neg_4878	Deoxycholic acid 3-glucuronide	metab_12047	6.57e-08	5.78e-07	1.3675	1.3661	1.3604	0.444	yes	C03033	-	-	map01100;map00040;map04976;map00053;map01240	Metabolic pathways;Pentose and glucuronate interconversions;Bile secretion;Ascorbate and aldarate metabolism;Biosynthesis of cofactors	Metabolism;Metabolism;Organismal Systems;Metabolism;Metabolism	Global and overview maps;Carbohydrate metabolism;Digestive system;Carbohydrate metabolism;Global and overview maps	LMST05010046;HMDB0002596	Lipids and lipid-like molecules	Steroids and steroid derivatives	Steroidal glycosides	72504-58-6	589.304	5.91565	M+Na-2H	C30H48O10	0	72.5	neg
neg_5096	Zaragozic acid A	metab_12290	5.91e-05	0.0001353	1.367	1.3583	1.5366	0.6197	yes	-	-	-	-	-	-	-	HMDB0259988;LMPK00000001	Organic acids and derivatives	Carboxylic acids and derivatives	Pentacarboxylic acids and derivatives	-	671.276	5.67743	M-H2O-H	C35H46O14	0	65.3	neg
pos_2565	Asparaginyl-Tryptophan	metab_1730	0.0003861	0.0006913	1.3664	1.3754	0.6137	-0.7045	yes	-	-	-	-	-	-	-	HMDB0028742	Organic acids and derivatives	Carboxylic acids and derivatives	Amino acids, peptides, and analogues	-	319.14	3.77008	M+H	C15H18N4O4	0	66.7	pos
neg_7367	Ala-Ala-Ala	metab_14800	2.05e-08	2.47e-07	1.3663	1.3674	0.6376	-0.6492	yes	-	-	-	-	-	-	-	HMDB0248092	Organic acids and derivatives	Carboxylic acids and derivatives	Amino acids, peptides, and analogues	-	230.114	0.977367	M-H	C9H17N3O4	0	50.4	neg
neg_3755	L-a-Lysophosphatidylserine	metab_10804	1.9e-06	7.74e-06	1.3656	1.3613	0.6954	-0.5241	yes	-	-	-	-	-	-	-	-	-	-	-	-	524.299	7.56232	M-H	C24H48NO9P	93.8	0	neg
pos_2557	N-Myristoyl Glutamine	metab_1721	1.26e-09	2.5e-08	1.3653	1.3654	0.6693	-0.5793	yes	-	-	-	-	-	-	-	LMFA08020219;HMDB0242050	Organic acids and derivatives	Carboxylic acids and derivatives	Amino acids, peptides, and analogues	-	401.239	3.74543	M+2Na-H	C19H36N2O4	0	35.2	pos
pos_2117	Pro Pro Glu	metab_1237	1.5e-05	3.89e-05	1.3651	1.3689	0.709	-0.4961	yes	-	-	-	-	-	-	-	-	-	-	-	-	342.166	2.79575	M+H	C15H23N3O6	34	0	pos
pos_4972	2-Methoxyestrone	metab_4375	2.46e-07	1.15e-06	1.365	1.3689	1.4309	0.517	yes	C05299	-	-	map00140	Steroid hormone biosynthesis	Metabolism	Lipid metabolism	HMDB0000010;LMST02010033;PW_C000005	Lipids and lipid-like molecules	Steroids and steroid derivatives	Estrane steroids	362-08-3	639.303	6.07533	2M+K	C19H24O3	0	32.9	pos
neg_6627	Asp Leu Ala Glu	metab_13984	3.5e-09	7.55e-08	1.3648	1.367	0.6475	-0.627	yes	-	-	-	-	-	-	-	-	-	-	-	-	445.194	3.6193	M-H	C18H30N4O9	43	0	neg
pos_5408	Ximoprofen	metab_4855	2.2e-07	1.05e-06	1.3646	1.3604	1.4661	0.552	yes	-	-	-	-	-	-	-	HMDB0259932	Phenylpropanoids and polyketides	Phenylpropanoic acids	Not Available	-	325.152	5.43447	M+ACN+Na	C15H19NO3	0	33.3	pos
pos_4854	Retinoyl-AZT	metab_4244	7.39e-09	8.41e-08	1.3637	1.3641	1.3895	0.4746	yes	-	-	-	-	-	-	-	HMDB0257175	Lipids and lipid-like molecules	Prenol lipids	Retinoids	-	532.293	6.1868	M+H-H2O	C30H39N5O5	0	36.7	pos
pos_2450	Avemectin B1	metab_1603	3.09e-06	9.94e-06	1.3626	1.3661	0.6991	-0.5165	yes	-	-	-	-	-	-	-	HMDB0254790	Phenylpropanoids and polyketides	Macrolides and analogues	Not Available	-	444.259	3.5041	M+2H	C49H74O14	0	51.2	pos
pos_229	LysoPC(20:4(8Z,11Z,14Z,17Z)/0:0)	metab_1425	1.65e-08	1.43e-07	1.3625	1.3616	0.7935	-0.3338	yes	C04230	Lipids	Phospholipids	map00564;map05231	Glycerophospholipid metabolism;Choline metabolism in cancer	Metabolism;Human Diseases	Lipid metabolism;Cancer: overview	HMDB0010396	Lipids and lipid-like molecules	Glycerophospholipids	Glycerophosphocholines	-	544.339	6.62358	M+H, M+Na, M+H-H2O	C28H50NO7P	0	81.9	pos
pos_7543	2'-C-Methylcytidine	metab_7207	0.0002352	0.0004425	1.3618	1.3583	0.6848	-0.5463	yes	-	-	-	-	-	-	-	HMDB0245530	Nucleosides, nucleotides, and analogues	Pyrimidine nucleosides	Not Available	-	296.066	0.835533	M+K	C10H15N3O5	0	42.6	pos
pos_5109	Dialdehyde	metab_4525	5.09e-08	3.32e-07	1.3617	1.3595	1.4597	0.5457	yes	C11678	-	-	map00901	Indole alkaloid biosynthesis	Metabolism	Biosynthesis of other secondary metabolites	HMDB0251125	Alkaloids and derivatives	Harmala alkaloids	Not Available	85955-83-5	401.207	5.9638	M+CH3OH+H	C21H24N2O4	0	59.4	pos
pos_4688	Neogitogenin	metab_4060	2.21e-08	1.78e-07	1.3616	1.3626	1.3608	0.4445	yes	C17003	-	-	-	-	-	-	HMDB0301778	Lipids and lipid-like molecules	Prenol lipids	Triterpenoids	6811-13-8	455.314	6.35318	M+Na	C27H44O4	0	71.9	pos
pos_1604	Nebularine	metab_672	1.8e-07	8.98e-07	1.3613	1.3613	0.7191	-0.4756	yes	C01736	-	-	-	-	-	-	HMDB0029956	Nucleosides, nucleotides, and analogues	Purine nucleosides	Not Available	550-33-4	270.119	0.898817	M+NH4, 2M+ACN+Na	C10H12N4O4	0	43.2	pos
pos_3598	Dehydrovomifoliol	metab_7709	4.24e-07	1.81e-06	1.3608	1.3623	1.4164	0.5022	yes	C02533	-	-	-	-	-	-	HMDB0036819;LMPR0103050009;HMDB0302822	Lipids and lipid-like molecules	Prenol lipids	Sesquiterpenoids	15764-81-5	205.122	6.63155	M+H-H2O	C13H18O3	0	74.3	pos
neg_6087	Deoxynivalenol 3-glucoside	metab_13388	6.86e-07	3.51e-06	1.3606	1.3631	0.6578	-0.6043	yes	-	-	-	-	-	-	-	HMDB0039852	Lipids and lipid-like molecules	Prenol lipids	Sesquiterpenoids	131180-21-7	503.179	4.20215	M+FA-H	C21H30O11	0	36	neg
pos_5081	3-Hydroxyphenyl-valeric acid	metab_4494	0.0001583	0.0003101	1.3605	1.3532	1.5449	0.6275	yes	-	-	-	-	-	-	-	HMDB0041666	Lipids and lipid-like molecules	Fatty Acyls	Fatty acids and conjugates	-	227.128	5.99563	M+CH3OH+H	C11H14O3	0	37.6	pos
neg_1537	Glabrin A	metab_8352	5.05e-06	1.71e-05	1.3598	1.3595	0.6748	-0.5674	yes	-	-	-	-	-	-	-	HMDB0301777	Organic acids and derivatives	Carboxylic acids and derivatives	Amino acids, peptides, and analogues	162157-00-8	349.162	3.46995	2M-H	C7H13NO4	0	43	neg
pos_1295	12-Hydroxyheptadeca-5,8,10-trienoic acid	metab_328	1.63e-05	4.18e-05	1.3597	1.3554	1.4586	0.5446	yes	-	-	-	-	-	-	-	HMDB0244447	Lipids and lipid-like molecules	Fatty Acyls	Fatty acids and conjugates	-	303.195	6.0993	M+Na, M+ACN+H	C17H28O3	0	41.9	pos
pos_7258	Pro Glu Ala	metab_6895	2.52e-08	1.97e-07	1.3593	1.364	0.6915	-0.5321	yes	-	-	-	-	-	-	-	-	-	-	-	-	316.15	1.86097	M+H	C13H21N3O6	75.9	0	pos
neg_1453	3-Methylxanthine	metab_8260	7.88e-10	2.82e-08	1.3592	1.3589	1.6237	0.6992	yes	C16357	-	-	map01100;map01110;map01120;map00232	Metabolic pathways;Biosynthesis of secondary metabolites;Microbial metabolism in diverse environments;Caffeine metabolism	Metabolism;Metabolism;Metabolism;Metabolism	Global and overview maps;Global and overview maps;Global and overview maps;Biosynthesis of other secondary metabolites	HMDB0001886	Organoheterocyclic compounds	Imidazopyrimidines	Purines and purine derivatives	1076-22-8	165.041	3.3753	M-H	C6H6N4O2	0	39.1	neg
neg_7093	Gln Val Asp Glu	metab_14501	0.000298	0.0005601	1.3579	1.3651	0.6707	-0.5763	yes	-	-	-	-	-	-	-	-	-	-	-	-	488.2	3.18613	M-H	C19H31N5O10	69.8	0	neg
pos_7216	Lysylisoleucine	metab_6851	6.42e-07	2.57e-06	1.3573	1.3596	0.6281	-0.6709	yes	-	-	-	-	-	-	-	HMDB0028954;HMDB0028955	Organic acids and derivatives	Carboxylic acids and derivatives	Amino acids, peptides, and analogues	7369-79-1;20556-13-2	130.602	2.3731	M+2H	C12H25N3O3	0	43.7	pos
neg_6967	Cinncassiol C2	metab_14360	1.29e-08	1.81e-07	1.3571	1.359	0.6741	-0.5689	yes	C17642	-	-	-	-	-	-	HMDB0035168	Lipids and lipid-like molecules	Prenol lipids	Sesquiterpenoids	73599-14-1	773.38	3.30417	2M+FA-H	C20H28O6	0	74.7	neg
neg_504	1-Heneicosanoyl-glycero-3-phosphoserine	metab_12228	1.86e-06	7.63e-06	1.3568	1.3537	0.7118	-0.4904	yes	-	-	-	-	-	-	-	LMGP03050026;HMDB0243883	Lipids and lipid-like molecules	Glycerophospholipids	Glycerophosphoserines	-	566.347	7.53885	M-H, M+Na-2H	C27H54NO9P	0	41.7	neg
pos_6746	Penmacric acid	metab_6331	1.61e-06	5.62e-06	1.3565	1.3558	1.551	0.6332	yes	-	-	-	-	-	-	-	HMDB0029436	Organic acids and derivatives	Carboxylic acids and derivatives	Amino acids, peptides, and analogues	55297-13-7	167.045	3.08888	M+H-2H2O	C7H10N2O5	0	32.6	pos
neg_2095	Biocytin	metab_8971	2.49e-07	1.59e-06	1.356	1.3611	0.6557	-0.609	yes	C05552	-	-	map01100;map00780;map04977	Metabolic pathways;Biotin metabolism;Vitamin digestion and absorption	Metabolism;Metabolism;Organismal Systems	Global and overview maps;Metabolism of cofactors and vitamins;Digestive system	HMDB0003134;PW_C001785	Organic acids and derivatives	Carboxylic acids and derivatives	Amino acids, peptides, and analogues	576-19-2	417.178	4.18648	M+FA-H	C16H28N4O4S	0	44.2	neg
pos_2617	Trp Pro Asp	metab_1786	1.18e-07	6.41e-07	1.3558	1.357	0.6685	-0.581	yes	-	-	-	-	-	-	-	-	-	-	-	-	417.177	3.89062	M+H	C20H24N4O6	45.2	0	pos
neg_4364	Ganoderic acid Mj	metab_11479	3.88e-07	2.28e-06	1.3556	1.3516	0.7154	-0.4832	yes	-	-	-	-	-	-	-	HMDB0035354	Lipids and lipid-like molecules	Prenol lipids	Triterpenoids	110024-15-2	581.321	6.5311	M+K-2H	C33H52O6	0	30.8	neg
neg_3037	2-(4-Methylphenoxy)-7-(4-chlorophenyl)heptanoic acid	metab_10012	1.08e-06	5e-06	1.3552	1.3606	0.6276	-0.6721	yes	-	-	-	-	-	-	-	HMDB0244635	Benzenoids	Benzene and substituted derivatives	Phenoxyacetic acid derivatives	-	381.101	5.86867	M+Cl	C20H23ClO3	0	37.6	neg
neg_1971	Pseudomonine	metab_8834	5.84e-05	0.000134	1.3549	1.3462	1.5388	0.6218	yes	-	-	-	-	-	-	-	HMDB0041438	Organic acids and derivatives	Carboxylic acids and derivatives	Amino acids, peptides, and analogues	172923-94-3	311.117	4.02917	M-H2O-H	C16H18N4O4	0	39.2	neg
neg_5010	5,6-Dihydroxyprostaglandin F1a	metab_12196	2.27e-08	2.65e-07	1.354	1.3547	0.6733	-0.5707	yes	C06475	Lipids	Eicosanoids	-	-	-	-	HMDB0012109	Lipids and lipid-like molecules	Fatty Acyls	Eicosanoids	11000-26-3	433.246	5.81318	M+FA-H	C20H36O7	0	44.2	neg
neg_1509	Chloramphenicol palmitate	metab_8322	9.84e-06	2.95e-05	1.3533	1.3559	0.6492	-0.6233	yes	C11726	-	-	-	-	-	-	HMDB0250087	Benzenoids	Benzene and substituted derivatives	Nitrobenzenes	530-43-8	605.244	3.43075	M+FA-H	C27H42Cl2N2O6	0	40.3	neg
pos_6599	Diflucortolone valerate	metab_6169	1.86e-07	9.21e-07	1.3516	1.3553	1.4195	0.5054	yes	-	-	-	-	-	-	-	HMDB0251261	Lipids and lipid-like molecules	Steroids and steroid derivatives	Pregnane steroids	-	511.291	3.28113	M+CH3OH+H	C27H36F2O5	0	34.6	pos
pos_7163	Val Leu His	metab_6794	9.32e-06	2.57e-05	1.3515	1.3571	0.7176	-0.4787	yes	-	-	-	-	-	-	-	-	-	-	-	-	368.229	2.57222	M+H	C17H29N5O4	60.5	0	pos
neg_1201	Amabiline	metab_7981	8.96e-07	4.31e-06	1.3512	1.3534	0.6491	-0.6235	yes	C10263	-	-	-	-	-	-	HMDB0302358	Alkaloids and derivatives	Not Available	Not Available	17958-43-9	304.151	1.91763	M+Na-2H	C15H25NO4	0	33.1	neg
neg_3384	Arachidonoyl Serinol	metab_10395	0.008213	0.01121	1.3508	1.3471	0.611	-0.7109	yes	-	-	-	-	-	-	-	HMDB0013650	Lipids and lipid-like molecules	Fatty Acyls	Fatty amides	183718-70-9	398.266	6.41385	M+Na-2H	C23H39NO3	0	34.2	neg
neg_649	MG(20:4(5Z,7E,11Z,14Z)-OH(9)/0:0/0:0)	metab_13832	3.41e-06	1.24e-05	1.3504	1.3519	1.4025	0.488	yes	-	-	-	-	-	-	-	HMDB0260476	Not Available	Not Available	Not Available	-	439.27	5.95487	M+FA-H, 2M+Hac-H	C23H38O5	0	42.7	neg
neg_2465	Kukoamine B	metab_9379	2.22e-07	1.46e-06	1.3504	1.351	0.6534	-0.6139	yes	C17616	-	-	-	-	-	-	HMDB0060525	Benzenoids	Phenols	Benzenediols	-	511.288	4.8492	M-H2O-H	C28H42N4O6	0	34.7	neg
pos_4074	LysoPE(0:0/18:0)	metab_3386	0.00108	0.001736	1.3501	1.3457	0.681	-0.5544	yes	-	-	-	-	-	-	-	HMDB0011129	Lipids and lipid-like molecules	Glycerophospholipids	Glycerophosphoethanolamines	899443-67-5	482.325	7.7435	M+H	C23H48NO7P	0	67	pos
pos_2969	2-amino-5-(amino-dimethylamino-methylidene)amino-pentanoic acid	metab_2173	0.0001051	0.0002157	1.3498	1.3418	1.5995	0.6777	yes	C03626	-	-	-	-	-	-	HMDB0001539;HMDB0244994	Organic acids and derivatives	Carboxylic acids and derivatives	Amino acids, peptides, and analogues	30315-93-6	266.159	4.88107	M+ACN+Na	C8H18N4O2	0	37.4	pos
neg_5916	8-Methoxyquinolin-2(1H)-one	metab_13199	2.13e-06	8.48e-06	1.3496	1.3499	0.6339	-0.6578	yes	-	-	-	-	-	-	-	HMDB0247449	Organoheterocyclic compounds	Quinolines and derivatives	Quinolones and derivatives	-	220.061	4.4443	M+FA-H	C10H9NO2	0	40	neg
pos_1948	4-(Glutamylamino) butanoate	metab_1049	5.85e-08	3.66e-07	1.3489	1.35	0.6884	-0.5386	yes	C15767	-	-	map01100;map00330	Metabolic pathways;Arginine and proline metabolism	Metabolism;Metabolism	Global and overview maps;Amino acid metabolism	HMDB0012161	Organic acids and derivatives	Carboxylic acids and derivatives	Amino acids, peptides, and analogues	5105-96-4	233.113	1.87688	M+H	C9H16N2O5	0	40.9	pos
neg_1999	Indoxyl Sulfate	metab_8864	0.0006851	0.00118	1.3471	1.3502	0.645	-0.6327	yes	-	-	-	-	-	-	-	HMDB0000682	Organic acids and derivatives	Organic sulfuric acids and derivatives	Arylsulfates	487-94-5	212.002	4.06838	M-H	C8H7NO4S	93.2	0	neg
pos_6194	Biotin sulfoxide	metab_5722	5.48e-06	1.63e-05	1.3458	1.3395	0.6958	-0.5232	yes	C20386	-	-	map01100;map00780	Metabolic pathways;Biotin metabolism	Metabolism;Metabolism	Global and overview maps;Metabolism of cofactors and vitamins	HMDB0249229	Organoheterocyclic compounds	Biotin and derivatives	Not Available	-	261.09	3.90663	M+H	C10H16N2O4S	0	38.2	pos
pos_5650	Difloxacin	metab_5120	6.69e-08	4.07e-07	1.3453	1.3424	1.5736	0.654	yes	C11234	-	-	-	-	-	-	HMDB0251259	Organoheterocyclic compounds	Quinolines and derivatives	Phenylquinolines	98106-17-3	417.176	4.94572	M+NH4	C21H19F2N3O3	72.8	0	pos
pos_3842	PC(17:0/0:0)	metab_3129	6.12e-05	0.0001333	1.3444	1.3334	0.7171	-0.4797	yes	C04230	Lipids	Phospholipids	map00564;map05231	Glycerophospholipid metabolism;Choline metabolism in cancer	Metabolism;Human Diseases	Lipid metabolism;Cancer: overview	LMGP01050024;HMDB0012108	Lipids and lipid-like molecules	Glycerophospholipids	Glycerophosphocholines	50930-23-9	532.337	7.66415	M+Na	C25H52NO7P	69.4	0	pos
pos_5749	Cocaine-alcohol	metab_5228	4.15e-07	1.78e-06	1.3444	1.3458	1.4368	0.5229	yes	-	-	-	-	-	-	-	HMDB0250390	Benzenoids	Benzene and substituted derivatives	Benzoic acids and derivatives	-	337.175	4.73635	M+NH4	C17H21NO5	0	68.6	pos
neg_6918	Tubocurarine	metab_14306	5.07e-09	9.46e-08	1.3442	1.3463	0.6795	-0.5574	yes	C07547	-	-	map01063;map07221	Biosynthesis of alkaloids derived from shikimate pathway;Nicotinic cholinergic receptor antagonists	Metabolism;Drug Development	Chemical structure transformation maps;Target-based classification: Ion channels	HMDB0015330	Organic oxygen compounds	Organooxygen compounds	Ethers	57-95-4;6989-98-6	630.274	3.33547	M+Na-2H	C37H41N2O6+	0	46.9	neg
pos_5973	N-(3,4-dimethoxyphenyl)-2-(1-methylpyrrol-2-yl)-2-oxoacetamide	metab_5476	6.84e-09	7.95e-08	1.343	1.3402	1.4809	0.5665	yes	-	-	-	-	-	-	-	-	-	-	-	-	289.118	4.29402	M+H	C15H16N2O4	45.5	0	pos
pos_1500	Dihydroetorphine	metab_557	8.51e-06	2.37e-05	1.343	1.3466	0.6833	-0.5494	yes	-	-	-	-	-	-	-	HMDB0251313	Benzenoids	Phenanthrenes and derivatives	Not Available	-	458.224	3.0331	M+H, M+2Na-H	C25H35NO4	0	30.3	pos
pos_3644	11,14-Eicosadienoic acid	metab_2913	3.68e-05	8.52e-05	1.3428	1.3333	1.4453	0.5314	yes	C16525	Lipids	Fatty acids	map01040	Biosynthesis of unsaturated fatty acids	Metabolism	Lipid metabolism	HMDB0244372;HMDB0005060;LMFA01030130	Lipids and lipid-like molecules	Fatty Acyls	Fatty acids and conjugates	5598-38-9	341.305	6.79055	M+CH3OH+H	C20H36O2	0	34.2	pos
pos_6122	N-Heptanoylglycine	metab_5643	0.00104	0.001681	1.3416	1.3304	1.6911	0.7579	yes	-	-	-	-	-	-	-	HMDB0013010	Organic acids and derivatives	Carboxylic acids and derivatives	Amino acids, peptides, and analogues	23783-23-5	220.154	4.01132	M+CH3OH+H	C9H17NO3	0	49.5	pos
neg_5977	Decarbamoylsaxitoxin	metab_13265	1.27e-08	1.8e-07	1.3414	1.3429	0.6696	-0.5787	yes	C20021	-	-	-	-	-	-	HMDB0038319	Phenylpropanoids and polyketides	Saxitoxins, gonyautoxins, and derivatives	Not Available	58911-04-9	571.274	4.35957	2M+Hac-H	C9H16N6O3	0	62	neg
neg_5184	12-oxo-PDA	metab_12388	1.08e-07	8.41e-07	1.3413	1.3436	1.5906	0.6696	yes	C01226	-	-	map01100;map00592;map01110	Metabolic pathways;alpha-Linolenic acid metabolism;Biosynthesis of secondary metabolites	Metabolism;Metabolism;Metabolism	Global and overview maps;Lipid metabolism;Global and overview maps	HMDB0302724;LMFA02010001;HMDB0301804	Lipids and lipid-like molecules	Fatty Acyls	Eicosanoids	85551-10-6	337.202	5.5417	M+FA-H	C18H28O3	0	86.9	neg
pos_6427	3,4-Dimethoxybenzaldehyde	metab_5981	3.01e-05	7.09e-05	1.3412	1.3347	1.6278	0.7029	yes	C02201	-	-	-	-	-	-	HMDB0032138	Benzenoids	Benzene and substituted derivatives	Methoxybenzenes	120-14-9	167.07	3.5446	M+H	C9H10O3	71.7	0	pos
pos_4710	Guanethidine	metab_4086	2.1e-08	1.73e-07	1.3412	1.3458	0.727	-0.46	yes	C07036	-	-	-	-	-	-	HMDB0015301;MJDBOTE0001576	Organic nitrogen compounds	Organonitrogen compounds	Guanidines	645-43-2;55-65-2	435.333	6.32922	2M+K	C10H22N4	0	38	pos
neg_3107	11b-Hydroxyandrost-4-ene-3,17-dione	metab_15360	6.29e-06	2.05e-05	1.3407	1.3424	1.5752	0.6555	yes	C05284	-	-	map00140	Steroid hormone biosynthesis	Metabolism	Lipid metabolism	PW_C002924;HMDB0006773	Organoheterocyclic compounds	Oxazinanes	Morpholines	382-44-5	347.186	5.93142	M+FA-H	C19H26O3	0	77.3	neg
pos_3645	V-Pyrro/NO	metab_2914	1.8e-09	3.13e-08	1.3406	1.3425	1.5319	0.6153	yes	-	-	-	-	-	-	-	HMDB0259734	Organoheterocyclic compounds	Pyrrolidines	Not Available	-	122.073	6.79845	M+H-2H2O	C6H11N3O2	0	39.5	pos
pos_3272	Deoxycholyltryptophan	metab_2508	2.03e-05	5.04e-05	1.3406	1.3389	1.4203	0.5062	yes	-	-	-	-	-	-	-	HMDB0242417	Not Available	Not Available	Not Available	-	623.343	5.81198	M+2Na-H	C35H50N2O5	0	60.8	pos
pos_2320	1-Deoxynojirimycin	metab_1460	0.0001142	0.0002318	1.3403	1.3503	0.6744	-0.5684	yes	C16843	-	-	-	-	-	-	HMDB0035359	Organoheterocyclic compounds	Piperidines	Not Available	19130-96-2	390.188	3.19342	2M+ACN+Na	C6H13NO4	0	57.1	pos
pos_789	Ala Val Val Pro Leu	metab_7462	8.58e-07	3.29e-06	1.34	1.3399	0.6888	-0.5378	yes	-	-	-	-	-	-	-	-	-	-	-	-	498.328	5.57107	M+H, M+Na	C24H43N5O6	63.8	0	pos
pos_2237	Ala Thr Val Glu	metab_1368	1.09e-08	1.09e-07	1.3395	1.3401	0.6817	-0.5527	yes	-	-	-	-	-	-	-	-	-	-	-	-	419.213	3.0331	M+H	C17H30N4O8	36.8	0	pos
neg_2883	Kanokoside D	metab_9842	4.81e-05	0.0001134	1.3393	1.3298	1.5268	0.6105	yes	C17431	-	-	-	-	-	-	HMDB0036105	Lipids and lipid-like molecules	Prenol lipids	Terpene glycosides	64703-88-4	669.26	5.5711	M+FA-H	C27H44O16	0	61.1	neg
pos_4952	10-Hydroxy-3-methoxy-1,3,5,7-cadinatetraen-9-one	metab_4353	6.16e-10	1.57e-08	1.3393	1.3417	1.4844	0.5698	yes	C09695	-	-	-	-	-	-	HMDB0036456	Lipids and lipid-like molecules	Prenol lipids	Sesquiterpenoids	72843-51-7	243.138	6.09132	M+H-H2O	C16H20O3	0	50.8	pos
pos_4493	5b-Cholestane-3a,7a,12a,23R,25-pentol	metab_3848	9.67e-09	1.01e-07	1.3382	1.3369	1.3284	0.4097	yes	C01571	Lipids	Fatty acids	map01100;map00061	Metabolic pathways;Fatty acid biosynthesis	Metabolism;Metabolism	Global and overview maps;Lipid metabolism	HMDB0000513;LMST01010240	Lipids and lipid-like molecules	Fatty Acyls	Fatty acids and conjugates	59906-14-8	475.34	6.63155	M+Na	C27H48O5	0	39.5	pos
pos_2999	Norfloxacin	metab_2206	1.42e-05	3.71e-05	1.338	1.3321	1.4867	0.5721	yes	C06687	Antibiotics	Quinolones	map02010	ABC transporters	Environmental Information Processing	Membrane transport	HMDB0015192	Organic acids and derivatives	Carboxylic acids and derivatives	Amino acids, peptides, and analogues	70458-96-7	337.165	4.96975	M+NH4	C16H18FN3O3	0	55.5	pos
neg_3443	Tetracosapentenoic acid	metab_10461	7.17e-08	6.17e-07	1.3377	1.3332	1.4082	0.4938	yes	-	-	-	-	-	-	-	HMDB0258880	Lipids and lipid-like molecules	Fatty Acyls	Fatty acids and conjugates	-	403.285	6.51547	M+FA-H	C24H38O2	0	87	neg
neg_6304	1-Methylcyclohexane-1,2-dicarboxylic acid	metab_13627	9.66e-05	0.0002065	1.3376	1.3263	1.5253	0.6091	yes	-	-	-	-	-	-	-	HMDB0243937	Organic acids and derivatives	Carboxylic acids and derivatives	Dicarboxylic acids and derivatives	-	231.087	3.96585	M+FA-H	C9H14O4	0	34.3	neg
neg_5163	N-Lactoylphenylalanine	metab_12365	0.0006954	0.001195	1.3366	1.3451	0.6633	-0.5923	yes	-	-	-	-	-	-	-	HMDB0062175	Organic acids and derivatives	Carboxylic acids and derivatives	Amino acids, peptides, and analogues	183241-73-8	236.093	5.57748	M-H	C12H15NO4	0	57.3	neg
pos_7455	Thr Gln	metab_7110	8.03e-06	2.25e-05	1.3363	1.3408	0.6987	-0.5173	yes	-	-	-	-	-	-	-	-	-	-	-	-	248.124	0.953583	M+H	C9H17N3O5	65.4	0	pos
pos_6065	Zaleplon	metab_5579	7.26e-08	4.32e-07	1.3356	1.3368	1.4077	0.4933	yes	C07484	-	-	-	-	-	-	HMDB0015097	Organoheterocyclic compounds	Diazines	Pyrimidines and pyrimidine derivatives	151319-34-5	323.16	4.10862	M+NH4	C17H15N5O	43.5	0	pos
pos_2054	Protopine	metab_1167	3.5e-07	1.55e-06	1.3355	1.3374	0.6914	-0.5323	yes	C05189	-	-	map00950;map01100;map01110;map01063	Isoquinoline alkaloid biosynthesis;Metabolic pathways;Biosynthesis of secondary metabolites;Biosynthesis of alkaloids derived from shikimate pathway	Metabolism;Metabolism;Metabolism;Metabolism	Biosynthesis of other secondary metabolites;Global and overview maps;Global and overview maps;Chemical structure transformation maps	HMDB0003920;MJDBOTE0000958	Alkaloids and derivatives	Protopine alkaloids	Not Available	130-86-9	336.122	2.676	M+H-H2O	C20H19NO5	0	35	pos
neg_2333	Betamethasone	metab_9235	0.0001068	0.000225	1.3353	1.339	0.6689	-0.58	yes	C06848	-	-	-	-	-	-	HMDB0014586;MJDBOTE0001387	Lipids and lipid-like molecules	Steroids and steroid derivatives	Hydroxysteroids	378-44-9	427.172	4.59687	M+Cl	C22H29FO5	0	55.3	neg
neg_6050	(2R)-2-Acetamido-6-hydroxy-2-(sulfanylmethyl)hex-3-enoic acid	metab_13348	2.29e-07	1.5e-06	1.3353	1.3362	1.5855	0.6649	yes	-	-	-	-	-	-	-	HMDB0257715	Organic acids and derivatives	Carboxylic acids and derivatives	Amino acids, peptides, and analogues	-	254.049	4.24918	M+Na-2H	C9H15NO4S	0	48.4	neg
neg_346	Steviobioside	metab_10478	5.78e-09	1.04e-07	1.335	1.3375	0.6781	-0.5604	yes	-	-	-	-	-	-	-	HMDB0036707	Lipids and lipid-like molecules	Prenol lipids	Terpene glycosides	41093-60-1	641.315	5.44175	M-H, M+FA-H	C32H50O13	0	68.8	neg
pos_3200	Hexenoylcarnitine	metab_2432	0.0005025	0.0008686	1.335	1.3216	1.5372	0.6203	yes	-	-	-	-	-	-	-	HMDB0253155	Organic acids and derivatives	Keto acids and derivatives	Medium-chain keto acids and derivatives	-	290.196	5.587	M+CH3OH+H	C13H23NO4	0	40.5	pos
neg_2100	Tetraphyllin B	metab_8978	9.52e-06	2.87e-05	1.3342	1.3377	0.6497	-0.6221	yes	-	-	-	-	-	-	-	HMDB0029914	Organic oxygen compounds	Organooxygen compounds	Carbohydrates and carbohydrate conjugates	34323-07-4	308.078	4.19432	M+Na-2H	C12H17NO7	0	50.4	neg
neg_2154	5-(3',4',5'-Trihydroxyphenyl)-gamma-valerolactone-O-methyl-O-sulphate	metab_9037	4.93e-09	9.29e-08	1.3329	1.3353	0.6447	-0.6333	yes	-	-	-	-	-	-	-	HMDB0060029	Benzenoids	Phenols	Benzenediols	-	333.029	4.27338	M-H	C12H14O9S	0	31	neg
pos_6052	Gamma-Glutamyltryptophan	metab_5565	5.47e-07	2.25e-06	1.332	1.3323	0.7341	-0.4459	yes	-	-	-	-	-	-	-	HMDB0252908;HMDB0029160	Organic acids and derivatives	Carboxylic acids and derivatives	Amino acids, peptides, and analogues	66471-20-3	334.14	4.13265	M+H	C16H19N3O5	0	62.3	pos
pos_6597	N-Acetyltryptophan	metab_6167	5.94e-10	1.54e-08	1.3318	1.3302	1.4472	0.5333	yes	-	-	-	-	-	-	-	HMDB0255052;HMDB0013713	Organic acids and derivatives	Carboxylic acids and derivatives	Amino acids, peptides, and analogues	1218-34-4	229.097	3.28907	M+H-H2O	C13H14N2O3	0	56.3	pos
pos_6409	Deoxypyridinoline	metab_5961	3.77e-05	8.73e-05	1.3316	1.3291	0.7206	-0.4728	yes	-	-	-	-	-	-	-	HMDB0000569	Organic acids and derivatives	Carboxylic acids and derivatives	Amino acids, peptides, and analogues	83462-55-9	430.23	3.5686	M+NH4	C18H28N4O7	0	67	pos
pos_1997	Ser Leu His	metab_1103	7.58e-05	0.0001618	1.3314	1.3324	0.6879	-0.5398	yes	-	-	-	-	-	-	-	-	-	-	-	-	356.193	2.52433	M+H	C15H25N5O5	59	0	pos
pos_5402	Fluvoxamine	metab_4849	1.79e-05	4.53e-05	1.3314	1.332	1.5687	0.6496	yes	C07571	-	-	-	-	-	-	HMDB0014322	Benzenoids	Benzene and substituted derivatives	Trifluoromethylbenzenes	54739-18-3	351.191	5.44247	M+CH3OH+H	C15H21F3N2O2	46.3	0	pos
pos_7094	Ala Met Glu	metab_6717	2.43e-06	8.04e-06	1.3313	1.3303	0.6849	-0.5461	yes	-	-	-	-	-	-	-	-	-	-	-	-	350.138	2.70018	M+H	C13H23N3O6S	49.4	0	pos
pos_2296	Sacubitril	metab_1432	7.9e-07	3.07e-06	1.3312	1.3296	0.7245	-0.4649	yes	-	-	-	-	-	-	-	HMDB0257439	Benzenoids	Benzene and substituted derivatives	Biphenyls and derivatives	-	376.187	3.15305	M+H-2H2O	C24H29NO5	0	46.1	pos
neg_5502	Mepenzolate	metab_12741	0.0001123	0.0002351	1.331	1.3319	0.6939	-0.5273	yes	C07818	-	-	-	-	-	-	HMDB0015591	Benzenoids	Benzene and substituted derivatives	Diphenylmethanes	25990-43-6	725.385	5.07205	2M+FA-H	C21H26NO3+	0	45	neg
pos_657	Puromycin	metab_6137	5.94e-05	0.0001299	1.3307	1.3348	0.6944	-0.5261	yes	C01610	-	-	map01100;map01110;map00998	Metabolic pathways;Biosynthesis of secondary metabolites;Biosynthesis of various secondary metabolites - part 2	Metabolism;Metabolism;Metabolism	Global and overview maps;Global and overview maps;Biosynthesis of other secondary metabolites	HMDB0256926	Nucleosides, nucleotides, and analogues	Purine nucleosides	Purine 3''-deoxyribonucleosides	53-79-2	489.256	4.21332	M+H-2H2O, M+NH4	C22H29N7O5	0	44.5	pos
pos_6951	Leu Glu Glu	metab_6558	1.55e-05	4.01e-05	1.3302	1.3393	0.71	-0.4941	yes	-	-	-	-	-	-	-	-	-	-	-	-	390.187	2.81167	M+H	C16H27N3O8	80.5	0	pos
neg_2407	(3a,5b,7a,12a)-24-[(carboxymethyl)amino]-1,12-dihydroxy-24-oxocholan-3-yl-b-D-Glucopyranosiduronic acid	metab_9315	9.14e-09	1.43e-07	1.3296	1.3313	0.6938	-0.5273	yes	-	-	-	-	-	-	-	HMDB0002472	Organic nitrogen compounds	Organonitrogen compounds	Oximes	99794-78-2	640.331	4.73097	M-H	C32H51NO12	0	42.6	neg
pos_4865	Nutriacholic acid	metab_4256	6.83e-10	1.69e-08	1.3295	1.3302	1.2711	0.3461	yes	-	-	-	-	-	-	-	HMDB0000467	Lipids and lipid-like molecules	Steroids and steroid derivatives	Bile acids, alcohols and derivatives	4651-67-6	408.31	6.17085	M+NH4	C24H38O4	0	84.5	pos
pos_5618	Cromakalim	metab_5084	6.1e-10	1.57e-08	1.3284	1.3268	1.3382	0.4202	yes	C11819	-	-	-	-	-	-	HMDB0250542	Organoheterocyclic compounds	Benzopyrans	1-benzopyrans	94470-67-4	319.165	5.00975	M+CH3OH+H	C16H18N2O3	0	64.4	pos
pos_1903	5-Methylcytidine	metab_1000	0.0001467	0.0002901	1.3277	1.3344	0.6823	-0.5516	yes	-	-	-	-	-	-	-	HMDB0257731;HMDB0000982	Nucleosides, nucleotides, and analogues	Pyrimidine nucleosides	Not Available	2140-61-6	290.135	1.70157	M+CH3OH+H	C10H15N3O5	0	44.9	pos
pos_3073	(R)-Marmin	metab_2290	7.99e-09	8.87e-08	1.3269	1.3243	1.3914	0.4765	yes	-	-	-	-	-	-	-	HMDB0030787	Phenylpropanoids and polyketides	Coumarins and derivatives	Not Available	14957-38-1	371.127	5.19377	M+K	C19H24O5	0	44.1	pos
pos_5428	Prostaglandin PGE2 glyceryl ester	metab_4877	0.001866	0.002858	1.3258	1.3269	0.595	-0.749	yes	-	-	-	-	-	-	-	HMDB0013045	Lipids and lipid-like molecules	Fatty Acyls	Eicosanoids	-	490.276	5.38645	M+ACN+Na	C23H38O7	0	41.8	pos
pos_9	Taurocholic Acid	metab_7583	9.53e-10	2.09e-08	1.3257	1.3274	0.7978	-0.3259	yes	C05122	Steroids	24-Carbon atoms	map01100;map04979;map00430;map00121;map04976;map00120	Metabolic pathways;Cholesterol metabolism;Taurine and hypotaurine metabolism;Secondary bile acid biosynthesis;Bile secretion;Primary bile acid biosynthesis	Metabolism;Organismal Systems;Metabolism;Metabolism;Organismal Systems;Metabolism	Global and overview maps;Digestive system;Metabolism of other amino acids;Lipid metabolism;Digestive system;Lipid metabolism	LMST05040001;HMDB0000036;PW_C000025;MJDBOTE0000483	Lipids and lipid-like molecules	Steroids and steroid derivatives	Bile acids, alcohols and derivatives	81-24-3	533.325	6.13112	M+CH3OH+H, 2M+H, M+2Na-H, M+NH4, M+H-H2O	C26H45NO7S	90.6	0	pos
pos_7273	Serylmethionine	metab_6911	8.59e-08	4.94e-07	1.3249	1.3256	0.6972	-0.5204	yes	-	-	-	-	-	-	-	HMDB0029045	Organic acids and derivatives	Carboxylic acids and derivatives	Amino acids, peptides, and analogues	3227-09-06	237.09	1.82128	M+H	C8H16N2O4S	0	64.4	pos
pos_3696	Ginkgoic acid	metab_2970	1.65e-12	3.15e-10	1.3249	1.3243	1.3795	0.4641	yes	C10794	-	-	-	-	-	-	HMDB0033897	Benzenoids	Benzene and substituted derivatives	Benzoic acids and derivatives	22910-60-7	379.281	6.94937	M+CH3OH+H	C22H34O3	0	37.9	pos
neg_2205	Tetrahydrofurfuryl acetate	metab_9094	2.9e-06	1.1e-05	1.3241	1.3173	1.632	0.7066	yes	-	-	-	-	-	-	-	HMDB0031176	Organoheterocyclic compounds	Tetrahydrofurans	Not Available	637-64-9	189.076	4.38305	M+FA-H	C7H12O3	0	33.5	neg
neg_7466	Threonyllysine	metab_14909	7.3e-05	0.0001625	1.3235	1.3242	0.6456	-0.6313	yes	-	-	-	-	-	-	-	HMDB0029066	Organic acids and derivatives	Carboxylic acids and derivatives	Amino acids, peptides, and analogues	23161-31-1	246.146	0.852167	M-H	C10H21N3O4	0	32.2	neg
neg_7228	Methionyl-Serine	metab_14649	2.03e-07	1.36e-06	1.3234	1.3235	0.6716	-0.5743	yes	-	-	-	-	-	-	-	HMDB0028982	Organic acids and derivatives	Carboxylic acids and derivatives	Amino acids, peptides, and analogues	-	235.076	1.8316	M-H	C8H16N2O4S	0	51.5	neg
pos_1468	Tryptophyl-Asparagine	metab_520	0.0004122	0.0007296	1.3233	1.3281	0.6665	-0.5854	yes	-	-	-	-	-	-	-	HMDB0029078	Organic acids and derivatives	Carboxylic acids and derivatives	Amino acids, peptides, and analogues	-	319.14	3.43215	M+H, M+CH3OH+H	C15H18N4O4	0	60.4	pos
neg_1368	Phenylalanyl-Gamma-glutamate	metab_8165	0.001366	0.002191	1.3227	1.3127	0.6612	-0.5969	yes	-	-	-	-	-	-	-	HMDB0029009	Organic acids and derivatives	Carboxylic acids and derivatives	Amino acids, peptides, and analogues	-	292.13	3.2807	M-H	C14H19N3O4	0	58.9	neg
pos_7093	Prostratin	metab_6716	1.97e-07	9.64e-07	1.3226	1.3217	0.6933	-0.5284	yes	C20197	-	-	-	-	-	-	HMDB0256861	Lipids and lipid-like molecules	Prenol lipids	Diterpenoids	60857-08-1	408.235	2.70018	M+NH4	C22H30O6	0	42.3	pos
pos_4491	LysoPE(15:0/0:0)	metab_3846	7.2e-08	4.3e-07	1.3226	1.3282	1.3076	0.3869	yes	-	-	-	-	-	-	-	HMDB0011502	Lipids and lipid-like molecules	Glycerophospholipids	Glycerophosphoethanolamines	-	440.277	6.6394	M+H	C20H42NO7P	89.5	0	pos
pos_6007	Leu-leu-tyr	metab_5515	2.18e-09	3.58e-08	1.3215	1.3235	0.6716	-0.5744	yes	C11331	-	-	-	-	-	-	HMDB0304804	Organic acids and derivatives	Carboxylic acids and derivatives	Amino acids, peptides, and analogues	20368-24-5	408.249	4.22932	M+H	C21H33N3O5	81.2	0	pos
pos_5770	5-Deoxykievitone	metab_5251	4.71e-10	1.32e-08	1.3208	1.3233	0.6603	-0.5989	yes	C10418	-	-	-	-	-	-	HMDB0034214	Phenylpropanoids and polyketides	Isoflavonoids	Isoflavans	74161-24-3	305.116	4.68837	M+H-2H2O	C20H20O5	0	52.5	pos
neg_4645	Sordarin	metab_11791	3.31e-07	2e-06	1.3194	1.3218	1.4046	0.4901	yes	-	-	-	-	-	-	-	HMDB0242737	Lipids and lipid-like molecules	Prenol lipids	Terpene glycosides	-	473.257	6.15708	M-H2O-H	C27H40O8	0	34.3	neg
pos_6683	Leu Gly Ala Pro Gly	metab_6262	1.2e-08	1.16e-07	1.3192	1.318	0.7113	-0.4915	yes	-	-	-	-	-	-	-	-	-	-	-	-	414.234	3.16903	M+H	C18H31N5O6	40.8	0	pos
pos_5257	Tyrosyl-Isoleucine	metab_4688	2.08e-06	7.04e-06	1.3191	1.319	1.5012	0.5861	yes	-	-	-	-	-	-	-	HMDB0029108	Organic acids and derivatives	Carboxylic acids and derivatives	Amino acids, peptides, and analogues	-	259.144	5.7721	M+H-2H2O	C15H22N2O4	0	63.2	pos
pos_2741	Threonic acid	metab_1923	2.97e-05	7.02e-05	1.3188	1.3166	1.5608	0.6423	yes	C01620	-	-	map01100;map00053	Metabolic pathways;Ascorbate and aldarate metabolism	Metabolism;Metabolism	Global and overview maps;Carbohydrate metabolism	HMDB0000943	Organic oxygen compounds	Organooxygen compounds	Carbohydrates and carbohydrate conjugates	7306-96-9	290.106	4.21332	2M+NH4	C4H8O5	0	39.6	pos
pos_6058	3-Hydroxyvalproic acid	metab_5571	0.002428	0.003642	1.3187	1.3071	1.5573	0.639	yes	C16651	-	-	map00982	Drug metabolism - cytochrome P450	Metabolism	Xenobiotics biodegradation and metabolism	LMFA01050494;HMDB0013899;PW_C008641	Lipids and lipid-like molecules	Fatty Acyls	Fatty acids and conjugates	58888-84-9	362.253	4.11663	2M+ACN+H	C8H16O3	0	35.7	pos
neg_6763	Tetraxetan	metab_14135	7.76e-07	3.89e-06	1.3182	1.3221	0.6921	-0.531	yes	-	-	-	-	-	-	-	HMDB0251592	Organic acids and derivatives	Carboxylic acids and derivatives	Tetracarboxylic acids and derivatives	-	385.173	3.48562	M-H2O-H	C16H28N4O8	0	48	neg
pos_7105	Minocycline	metab_6730	0.0003471	0.0006283	1.3173	1.317	0.6894	-0.5365	yes	C07225	-	-	-	-	-	-	HMDB0015152;LMPK07000002;PW_C009450	Phenylpropanoids and polyketides	Tetracyclines	Not Available	10118-90-8	490.215	2.68427	M+CH3OH+H	C23H27N3O7	0	55	pos
pos_5418	Enterolactone	metab_4866	4.82e-07	2.01e-06	1.3169	1.3114	1.5405	0.6234	yes	C18165	-	-	-	-	-	-	HMDB0006101	Lignans, neolignans and related compounds	Furanoid lignans	Tetrahydrofuran lignans	78473-71-9;185254-87-9	281.117	5.41047	M+H-H2O	C18H18O4	0	71.7	pos
pos_2473	Beta-Hydroxy-gamma-trimethylaminobutyric acid	metab_1628	0.0002299	0.0004336	1.3169	1.3076	1.4165	0.5023	yes	-	-	-	-	-	-	-	HMDB0244982	Organic acids and derivatives	Carboxylic acids and derivatives	Amino acids, peptides, and analogues	-	386.228	3.5606	2M+ACN+Na	C7H15NO3	0	64.1	pos
pos_1624	[(2S,3R)-2-Amino-3-hydroxybutanoyl] (2S)-pyrrolidine-2-carboxylate	metab_694	6.84e-06	1.96e-05	1.3166	1.3083	0.7547	-0.4061	yes	-	-	-	-	-	-	-	HMDB0257877	Organic acids and derivatives	Carboxylic acids and derivatives	Amino acids, peptides, and analogues	-	217.118	0.961483	M+H, M+ACN+H	C9H16N2O4	0	42.6	pos
pos_4853	Pokeberrygenin	metab_4243	0.0001517	0.0002992	1.3164	1.3122	0.7162	-0.4816	yes	-	-	-	-	-	-	-	HMDB0034653	Lipids and lipid-like molecules	Prenol lipids	Triterpenoids	75206-90-5	555.31	6.1868	M+K	C31H48O6	0	34.5	pos
pos_5435	12alpha-hydroxy-3-oxo-5beta-cholan-24-oic Acid	metab_4885	0.006615	0.00908	1.3161	1.3012	1.7197	0.7821	yes	-	-	-	-	-	-	-	HMDB0062742;LMST04010168	Lipids and lipid-like molecules	Steroids and steroid derivatives	Bile acids, alcohols and derivatives	4185-01-07	413.264	5.37043	M+Na	C24H38O4	0	65.1	pos
pos_5331	Lotusine	metab_4770	0.0007704	0.001281	1.3153	1.306	1.5909	0.6698	yes	C17567	-	-	-	-	-	-	HMDB0033347	Organoheterocyclic compounds	Isoquinolines and derivatives	Benzylisoquinolines	6871-67-6	356.206	5.6036	M+ACN+H	C19H24NO3+	0	32.7	pos
pos_7398	Asp Thr Ala	metab_7048	1.5e-05	3.89e-05	1.3153	1.3173	0.6946	-0.5257	yes	-	-	-	-	-	-	-	-	-	-	-	-	306.129	1.20687	M+H	C11H19N3O7	68.8	0	pos
neg_6810	L-Coprine	metab_14187	6.33e-06	2.06e-05	1.3148	1.3131	0.7186	-0.4767	yes	C08271	-	-	-	-	-	-	HMDB0034266	Organic acids and derivatives	Carboxylic acids and derivatives	Amino acids, peptides, and analogues	58919-61-2	403.183	3.43858	2M-H	C8H14N2O4	0	52.1	neg
pos_5067	Palitantin, (+)-	metab_4478	0.0001832	0.0003537	1.3132	1.305	1.4746	0.5603	yes	-	-	-	-	-	-	-	-	-	-	-	-	255.159	6.01148	M+H	C14H22O4	62.2	0	pos
neg_5803	N-alpha-Acetyl-L-citrulline	metab_13074	3.23e-06	1.19e-05	1.3128	1.3169	0.7033	-0.5077	yes	C15532	-	-	map01100;map00220;map01230	Metabolic pathways;Arginine biosynthesis;Biosynthesis of amino acids	Metabolism;Metabolism;Metabolism	Global and overview maps;Amino acid metabolism;Global and overview maps	HMDB0000856	Organic acids and derivatives	Carboxylic acids and derivatives	Amino acids, peptides, and analogues	33965-42-3	493.23	4.59687	2M+Hac-H	C8H15N3O4	0	76.8	neg
pos_31	Cavipetin C	metab_2319	1.63e-11	1.48e-09	1.3126	1.3134	1.2475	0.3191	yes	-	-	-	-	-	-	-	HMDB0030366	Lipids and lipid-like molecules	Prenol lipids	Diterpenoids	128552-90-9	371.258	6.10727	M+H-H2O, M+Na, M+NH4, M+H-2H2O	C24H36O4	0	57	pos
neg_5643	PS(18:4(6Z,9Z,12Z,15Z)/14:1(9Z))	metab_12896	0.0001128	0.0002359	1.3119	1.3132	0.6946	-0.5258	yes	C02737	Lipids	Phospholipids	map01100;map00564;map01110;map05146;map05322;map00260;map05140	Metabolic pathways;Glycerophospholipid metabolism;Biosynthesis of secondary metabolites;Amoebiasis;Systemic lupus erythematosus;Glycine, serine and threonine metabolism;Leishmaniasis	Metabolism;Metabolism;Metabolism;Human Diseases;Human Diseases;Metabolism;Human Diseases	Global and overview maps;Lipid metabolism;Global and overview maps;Infectious disease: parasitic;Immune disease;Amino acid metabolism;Infectious disease: parasitic	PW_C060893;LMGP03010428;HMDB0112486	Lipids and lipid-like molecules	Glycerophospholipids	Glycerophosphoserines	-	706.415	4.85657	M-H2O-H	C38H64NO10P	0	49.4	neg
pos_5852	2,4(1H,3H)-Pyrimidinedione, 5-fluoro-1-(tetrahydro-2-furanyl)-, (R)-	metab_5342	8.19e-05	0.0001733	1.3117	1.3096	0.6543	-0.612	yes	C12673	-	-	map00983	Drug metabolism - other enzymes	Metabolism	Xenobiotics biodegradation and metabolism	HMDB0246215	Organoheterocyclic compounds	Diazines	Pyrimidines and pyrimidine derivatives	-	233.092	4.51983	M+CH3OH+H	C8H9FN2O3	0	47.1	pos
neg_5724	2-Hydroxycampholonic acid	metab_12986	0.0003512	0.000648	1.3109	1.2992	1.7256	0.7871	yes	-	-	-	-	-	-	-	HMDB0301821	Lipids and lipid-like molecules	Prenol lipids	Monoterpenoids	-	181.086	4.72313	M-H2O-H	C10H16O4	0	50.2	neg
pos_5915	PA(10:0/20:4(6E,8Z,11Z,14Z)-OH(5S))	metab_5412	5.18e-06	1.55e-05	1.3106	1.3125	0.7023	-0.5099	yes	-	-	-	-	-	-	-	HMDB0262649	Not Available	Not Available	Not Available	-	673.34	4.39852	M+2Na-H	C33H57O9P	0	40.6	pos
neg_1230	Asparaginyl-Methionine	metab_8013	0.0001137	0.0002376	1.3105	1.3144	0.6432	-0.6367	yes	-	-	-	-	-	-	-	HMDB0028737	Organic acids and derivatives	Carboxylic acids and derivatives	Amino acids, peptides, and analogues	-	262.087	2.50508	M-H	C9H17N3O4S	0	50.4	neg
neg_2652	Bisphenol B	metab_9587	2.66e-08	2.95e-07	1.3104	1.312	0.6203	-0.6891	yes	C14225	-	-	-	-	-	-	HMDB0245327	Benzenoids	Benzene and substituted derivatives	Diphenylmethanes	77-40-7	543.279	5.176	2M+Hac-H	C16H18O2	0	61.1	neg
neg_6822	Psilocin	metab_14200	1.07e-06	4.97e-06	1.3103	1.3121	0.6522	-0.6167	yes	C08312	-	-	map01110;map01063;map00901	Biosynthesis of secondary metabolites;Biosynthesis of alkaloids derived from shikimate pathway;Indole alkaloid biosynthesis	Metabolism;Metabolism;Metabolism	Global and overview maps;Chemical structure transformation maps;Biosynthesis of other secondary metabolites	HMDB0042000	Organoheterocyclic compounds	Indoles and derivatives	Tryptamines and derivatives	520-53-6	249.124	3.43075	M+FA-H	C12H16N2O	0	49	neg
neg_3440	Alpha-Linolenoyl ethanolamide	metab_10458	9.81e-09	1.5e-07	1.3101	1.3125	0.6921	-0.531	yes	C13828	-	-	-	-	-	-	HMDB0013624	Organic nitrogen compounds	Organonitrogen compounds	Amines	-	366.265	6.51547	M+FA-H	C20H35NO2	0	55.3	neg
neg_1364	Geneticin	metab_8161	1.95e-08	2.38e-07	1.3099	1.3114	0.692	-0.5312	yes	C17703	-	-	map01110;map00524	Biosynthesis of secondary metabolites;Neomycin, kanamycin and gentamicin biosynthesis	Metabolism;Metabolism	Global and overview maps;Biosynthesis of other secondary metabolites	HMDB0242565	Organic oxygen compounds	Organooxygen compounds	Carbohydrates and carbohydrate conjugates	49863-47-0	533.221	3.27288	M+K-2H	C20H40N4O10	0	45.7	neg
pos_2497	Dihydrodigoxin	metab_1654	1.53e-05	3.97e-05	1.3087	1.3107	0.7112	-0.4917	yes	-	-	-	-	-	-	-	HMDB0041879	Lipids and lipid-like molecules	Steroids and steroid derivatives	Steroid lactones	5297-10-09	403.218	3.6092	M+H+Na	C41H66O14	0	64.8	pos
neg_2172	Lamivudine-monophosphate	metab_9057	1.12e-07	8.66e-07	1.3086	1.3084	1.5337	0.6171	yes	-	-	-	-	-	-	-	HMDB0060641;PW_C040659	Nucleosides, nucleotides, and analogues	Nucleoside and nucleotide analogues	Not Available	-	289.998	4.32042	M-H2O-H	C8H12N3O6PS	0	42.3	neg
pos_2618	Desglucocheirotoxol	metab_1787	4.99e-10	1.37e-08	1.3084	1.3103	0.694	-0.527	yes	-	-	-	-	-	-	-	HMDB0033828	Lipids and lipid-like molecules	Steroids and steroid derivatives	Steroid lactones	29336-13-8	585.324	3.89062	M+CH3OH+H	C29H44O10	0	47.2	pos
pos_3409	Lucidenic acid M	metab_2659	6.43e-08	3.92e-07	1.3083	1.3074	1.3607	0.4443	yes	C10029	-	-	-	-	-	-	HMDB0035973	Phenylpropanoids and polyketides	Flavonoids	O-methylated flavonoids	110241-33-3	427.284	6.07533	M+H-2H2O	C27H42O6	0	38	pos
neg_6737	N2-Succinyl-L-ornithine	metab_14106	1.26e-08	1.8e-07	1.3082	1.3099	0.6723	-0.5729	yes	C03415	-	-	map01100;map00330	Metabolic pathways;Arginine and proline metabolism	Metabolism;Metabolism	Global and overview maps;Amino acid metabolism	HMDB0001199	Organic acids and derivatives	Carboxylic acids and derivatives	Amino acids, peptides, and analogues	899816-95-6	523.226	3.50913	2M+Hac-H	C9H16N2O5	0	49.2	neg
pos_341	Glycyl-Lysine	metab_2660	5.9e-07	2.39e-06	1.3079	1.3059	0.7557	-0.4041	yes	-	-	-	-	-	-	-	HMDB0028846	Organic acids and derivatives	Carboxylic acids and derivatives	Amino acids, peptides, and analogues	-	204.134	0.75615	M+H, M+Na	C8H17N3O3	0	36.7	pos
pos_3672	LysoPC(22:4(7Z,10Z,13Z,16Z)/0:0)	metab_2944	3.66e-10	1.13e-08	1.3077	1.3101	0.7364	-0.4415	yes	C04230	Lipids	Phospholipids	map00564;map05231	Glycerophospholipid metabolism;Choline metabolism in cancer	Metabolism;Human Diseases	Lipid metabolism;Cancer: overview	HMDB0010401	Lipids and lipid-like molecules	Glycerophospholipids	Glycerophosphocholines	-	572.371	6.84615	M+H	C30H54NO7P	0	78.8	pos
pos_5484	PS(20:4(5Z,8Z,11Z,14Z)-OH(16R)/22:4(7Z,10Z,13Z,16Z))	metab_4937	1.23e-06	4.46e-06	1.3076	1.3073	0.7007	-0.5131	yes	-	-	-	-	-	-	-	HMDB0283203	Not Available	Not Available	Not Available	-	460.753	5.28178	M+2Na	C48H78NO11P	0	72.7	pos
neg_7257	Thymidine glycol	metab_14681	4.38e-08	4.24e-07	1.3067	1.3086	0.7144	-0.4852	yes	-	-	-	-	-	-	-	HMDB0042036	Nucleosides, nucleotides, and analogues	Pyrimidine nucleosides	Pyrimidine 2''-deoxyribonucleosides	32645-65-1	275.089	1.6281	M-H	C10H16N2O7	0	55.4	neg
neg_7013	1-Deoxy-D-glucitol	metab_14413	4.02e-06	1.42e-05	1.3067	1.3092	0.7122	-0.4896	yes	-	-	-	-	-	-	-	HMDB0041500;LMFA05000598	Organic oxygen compounds	Organooxygen compounds	Carbohydrates and carbohydrate conjugates	18545-96-5	331.162	3.26505	2M-H	C6H14O5	0	34.9	neg
neg_5626	1-Hydroxyisoquinoline	metab_12878	5.84e-10	2.36e-08	1.3064	1.3042	1.373	0.4573	yes	C06324	-	-	-	-	-	-	HMDB0243900	Organoheterocyclic compounds	Isoquinolines and derivatives	Isoquinolones and derivatives	-	190.05	4.88793	M+FA-H	C9H7NO	0	39.7	neg
neg_5955	Ala Gly Leu Val Ser	metab_13241	6.78e-09	1.15e-07	1.3052	1.3055	0.6943	-0.5263	yes	-	-	-	-	-	-	-	-	-	-	-	-	444.246	4.38305	M-H	C19H35N5O7	55.9	0	neg
neg_6305	2,8-Quinolinediol	metab_13628	3.51e-09	7.55e-08	1.3048	1.305	1.5969	0.6753	yes	C06342	-	-	-	-	-	-	HMDB0240311	Organoheterocyclic compounds	Quinolines and derivatives	Quinolones and derivatives	15450-76-7	206.045	3.96585	M+FA-H	C9H7NO2	0	75.5	neg
pos_2896	3,4-Methylenesebacic acid	metab_2092	0.0003599	0.0006491	1.3046	1.2955	1.6025	0.6803	yes	-	-	-	-	-	-	-	HMDB0059729	Lipids and lipid-like molecules	Fatty Acyls	Fatty acids and conjugates	-	244.154	4.64772	M+NH4	C12H18O4	0	60	pos
neg_4820	4-Oxododecanedioic acid	metab_11985	0.000318	0.0005935	1.3044	1.2932	1.4102	0.4959	yes	-	-	-	-	-	-	-	-	-	-	-	-	243.124	5.95487	M-H	C12H20O5	72.4	0	neg
neg_6577	Imidaprilat	metab_13928	1.01e-06	4.77e-06	1.3043	1.3064	0.6855	-0.5447	yes	C21519	-	-	-	-	-	-	HMDB0041908;HMDB0244459	Organic acids and derivatives	Carboxylic acids and derivatives	Amino acids, peptides, and analogues	89371-44-8	422.157	3.66632	M+FA-H	C18H23N3O6	0	70.2	neg
pos_4920	Val Thr Pro Gly Gly	metab_4318	0.0005418	0.0009283	1.3042	1.2935	1.4616	0.5476	yes	-	-	-	-	-	-	-	-	-	-	-	-	430.226	6.1152	M+H	C18H31N5O7	65.3	0	pos
pos_4011	12-OPDA	metab_3317	6.54e-05	0.0001416	1.304	1.2964	1.4544	0.5405	yes	C01226	-	-	map01100;map00592;map01110	Metabolic pathways;alpha-Linolenic acid metabolism;Biosynthesis of secondary metabolites	Metabolism;Metabolism;Metabolism	Global and overview maps;Lipid metabolism;Global and overview maps	HMDB0301804	Lipids and lipid-like molecules	Fatty Acyls	Eicosanoids	85551-10-6	293.211	7.79933	M+H	C18H28O3	65.7	0	pos
pos_2849	Prolyl-Tyrosine	metab_2040	1.23e-05	3.27e-05	1.3026	1.3107	0.679	-0.5584	yes	-	-	-	-	-	-	-	HMDB0029029	Organic acids and derivatives	Carboxylic acids and derivatives	Amino acids, peptides, and analogues	-	243.113	4.51122	M+H-2H2O	C14H18N2O4	0	34.1	pos
pos_6219	Sarmentosin	metab_5750	0.005692	0.007905	1.3026	1.2877	0.6189	-0.6923	yes	C08340	-	-	-	-	-	-	HMDB0030697	Lipids and lipid-like molecules	Fatty Acyls	Fatty acyl glycosides	71933-54-5	317.134	3.86662	M+ACN+H	C11H17NO7	0	34.7	pos
pos_5416	2-Hydroxyundec-5-enoylcarnitine	metab_4864	0.0002277	0.0004302	1.3021	1.2931	1.4368	0.5228	yes	-	-	-	-	-	-	-	HMDB0241168	Lipids and lipid-like molecules	Fatty Acyls	Fatty acid esters	-	344.243	5.41047	M+H	C18H33NO5	0	36.3	pos
neg_545	Alisol A 24-acetate	metab_12682	4.99e-05	0.0001169	1.3018	1.3037	0.7426	-0.4294	yes	-	-	-	-	-	-	-	HMDB0260413	Lipids and lipid-like molecules	Prenol lipids	Triterpenoids	-	577.375	6.48417	M-H, M+FA-H	C32H52O6	0	37.3	neg
neg_2434	N-Methoxysuccinyl-Ala-Ala-Pro-Val	metab_9345	6.65e-07	3.44e-06	1.3008	1.302	0.6275	-0.6724	yes	-	-	-	-	-	-	-	HMDB0255168	Organic acids and derivatives	Carboxylic acids and derivatives	Amino acids, peptides, and analogues	-	469.23	4.78798	M-H	C21H34N4O8	0	40	neg
neg_2873	Ubenimex	metab_9831	1.01e-05	3.02e-05	1.3008	1.306	1.5879	0.6671	yes	C00732	-	-	-	-	-	-	-	-	-	-	58970-76-6	307.166	5.54952	M-H	C16H24N2O4	47.4	0	neg
pos_738	Cucurbic acid	metab_7029	0.0013	0.002052	1.3008	1.2877	1.458	0.544	yes	C08482	-	-	-	-	-	-	HMDB0029388	Lipids and lipid-like molecules	Fatty Acyls	Lineolic acids and derivatives	58240-50-9	213.148	5.00975	M+H-H2O, M+H	C12H20O3	0	49.1	pos
pos_1340	Sulfoglycolithocholate(2-)	metab_379	8.05e-06	2.26e-05	1.3005	1.2922	0.7831	-0.3528	yes	-	-	-	-	-	-	-	HMDB0062801	Lipids and lipid-like molecules	Steroids and steroid derivatives	Bile acids, alcohols and derivatives	-	496.273	6.02748	M+H, M+H-H2O	C26H43NO7S	0	44.9	pos
pos_6139	3-Hexenoic acid	metab_5661	0.002661	0.003964	1.3004	1.2912	1.7257	0.7872	yes	-	-	-	-	-	-	-	LMFA01030009;HMDB0031501	Lipids and lipid-like molecules	Fatty Acyls	Fatty acids and conjugates	4219-24-3	246.17	3.99532	2M+NH4	C6H10O2	0	33.4	pos
neg_2481	Digitoxigenin bisdigitoxide	metab_9397	1.31e-05	3.77e-05	1.3003	1.3029	0.698	-0.5188	yes	-	-	-	-	-	-	-	HMDB0251275	Lipids and lipid-like molecules	Steroids and steroid derivatives	Steroid lactones	-	671.326	4.8801	M+K-2H	C35H54O10	0	62.1	neg
neg_5971	Cabastine	metab_13259	8.76e-06	2.68e-05	1.2999	1.295	0.6762	-0.5645	yes	-	-	-	-	-	-	-	HMDB0249522	Organoheterocyclic compounds	Piperidines	Phenylpiperidines	-	401.204	4.36738	M-H2O-H	C26H29FN2O2	0	36.5	neg
pos_2121	Gln Lys Glu	metab_1242	0.0002423	0.0004544	1.2996	1.2963	0.6944	-0.5261	yes	-	-	-	-	-	-	-	-	-	-	-	-	404.214	2.79575	M+H	C16H29N5O7	57.8	0	pos
pos_6549	Sisomicin sulfate	metab_6114	2.71e-05	6.48e-05	1.2991	1.3056	0.7247	-0.4645	yes	-	-	-	-	-	-	-	HMDB0242632	Not Available	Not Available	Not Available	-	470.261	3.35237	M+Na	C19H37N5O7	0	84.8	pos
pos_3171	Oseltamivir	metab_2399	5.58e-06	1.65e-05	1.2976	1.3009	1.5146	0.5989	yes	C08092	-	-	-	-	-	-	HMDB0014343;HMDB0035141	Organic acids and derivatives	Carboxylic acids and derivatives	Amino acids, peptides, and analogues	489-20-3;204255-11-8;196618-13-0	354.238	5.48247	M+ACN+H	C16H28N2O4	0	44.2	pos
neg_6356	Hydroxyprolyl-Alanine	metab_13684	0.0005354	0.0009497	1.2973	1.2952	0.6958	-0.5232	yes	-	-	-	-	-	-	-	HMDB0028856	Organic acids and derivatives	Carboxylic acids and derivatives	Amino acids, peptides, and analogues	-	403.183	3.90323	2M-H	C8H14N2O4	0	62.9	neg
pos_2205	Asn Asp Leu	metab_1333	9.95e-07	3.73e-06	1.2966	1.2983	0.7017	-0.5111	yes	-	-	-	-	-	-	-	-	-	-	-	-	361.172	2.96135	M+H	C14H24N4O7	47.4	0	pos
pos_5587	Ecdysone	metab_5050	3.14e-07	1.41e-06	1.2945	1.2955	1.4077	0.4934	yes	C00477	Steroids;Hormones and transmitters	27-Carbon atoms;Steroid hormones	map00981;map04214	Insect hormone biosynthesis;Apoptosis - fly	Metabolism;Cellular Processes	Metabolism of terpenoids and polyketides;Cell growth and death	HMDB0251684;LMST01010210	Lipids and lipid-like molecules	Steroids and steroid derivatives	Bile acids, alcohols and derivatives	3604-87-3	447.31	5.07375	M+H-H2O	C27H44O6	0	70.9	pos
neg_6949	3-Hydroxyindolin-2-one-sulfate	metab_14340	8.64e-07	4.21e-06	1.2934	1.2954	0.6895	-0.5364	yes	-	-	-	-	-	-	-	HMDB0304928	Organoheterocyclic compounds	Indoles and derivatives	Indolines	-	227.997	3.32765	M-H	C8H7NO5S	0	45.4	neg
neg_6854	1-Hydroxypyrene glucuronide	metab_14235	1.03e-07	8.09e-07	1.2934	1.2926	1.4803	0.5659	yes	-	-	-	-	-	-	-	HMDB0059759	Benzenoids	Pyrenes	Not Available	-	415.081	3.3988	M+Na-2H	C22H18O7	0	39.5	neg
pos_2757	Diphenhydramine N-glucuronide	metab_1940	5.65e-09	6.99e-08	1.2934	1.2948	0.6873	-0.541	yes	-	-	-	-	-	-	-	HMDB0060897	Organic acids and derivatives	Carboxylic acids and derivatives	Amino acids, peptides, and analogues	-	474.238	4.26132	M+ACN+H	C23H30NO7+	0	44.4	pos
neg_6855	4'-Hydroxycilostazol, trans-	metab_14236	1.54e-06	6.56e-06	1.2932	1.2897	0.6774	-0.562	yes	-	-	-	-	-	-	-	HMDB0247541	Organoheterocyclic compounds	Quinolines and derivatives	Quinolones and derivatives	-	406.183	3.3988	M+Na-2H	C20H27N5O3	0	49.2	neg
neg_1055	N-(Hydroxymethyl)acrylamide	metab_7819	0.0001638	0.0003284	1.293	1.3018	0.7181	-0.4777	yes	C19456	-	-	-	-	-	-	HMDB0255023	Organic acids and derivatives	Carboxylic acids and derivatives	Acrylic acids and derivatives	924-42-5	247.093	0.961717	2M+FA-H	C4H7NO2	0	46.4	neg
neg_6594	Tilsuprost	metab_13947	7.28e-06	2.3e-05	1.2929	1.2937	0.722	-0.47	yes	-	-	-	-	-	-	-	HMDB0259097	Lipids and lipid-like molecules	Fatty Acyls	Fatty acid esters	-	428.215	3.65065	M+FA-H	C20H33NO4S	0	45.9	neg
neg_2999	Remifentanil Acid	metab_9968	0.0001421	0.0002901	1.2922	1.2839	1.5539	0.6359	yes	-	-	-	-	-	-	-	HMDB0257145	Organic acids and derivatives	Carboxylic acids and derivatives	Amino acids, peptides, and analogues	-	397.153	5.81318	M+Cl	C19H26N2O5	0	50.9	neg
neg_5518	Alpha-dihydroartemisinin	metab_12758	0.0001256	0.0002597	1.292	1.2822	1.5815	0.6613	yes	-	-	-	-	-	-	-	HMDB0060593	Lipids and lipid-like molecules	Prenol lipids	Sesquiterpenoids	81496-81-3	329.16	5.04743	M+FA-H	C15H24O5	0	44.5	neg
neg_251	(His(1-ME)2)-trh	metab_9429	0.01929	0.02474	1.2911	1.3033	0.5429	-0.8812	yes	-	-	-	-	-	-	-	HMDB0246180	Organic acids and derivatives	Carboxylic acids and derivatives	Amino acids, peptides, and analogues	-	421.183	4.24918	M-H, M+FA-H	C17H24N6O4	0	60.1	neg
neg_5678	L-Canaline	metab_12934	2.77e-06	1.05e-05	1.2907	1.2876	0.6804	-0.5555	yes	C08270	-	-	-	-	-	-	HMDB0012251	Organic acids and derivatives	Carboxylic acids and derivatives	Amino acids, peptides, and analogues	496-93-5	401.204	4.79582	3M-H	C4H10N2O3	0	46.5	neg
neg_1199	Leucyl-Glutamine	metab_7977	1.19e-06	5.44e-06	1.2907	1.2921	0.7488	-0.4174	yes	-	-	-	-	-	-	-	HMDB0028927	Organic acids and derivatives	Carboxylic acids and derivatives	Amino acids, peptides, and analogues	-	258.146	1.9098	M-H	C11H21N3O4	0	49.8	neg
neg_4951	D-(+)-dihydrocarvone	metab_12129	9.02e-05	0.0001949	1.2906	1.2811	1.527	0.6107	yes	C11398	-	-	map01220;map00903	Degradation of aromatic compounds;Limonene and pinene degradation	Metabolism;Metabolism	Global and overview maps;Metabolism of terpenoids and polyketides	HMDB0302236	Lipids and lipid-like molecules	Prenol lipids	Monoterpenoids	-	197.118	5.87652	M+FA-H	C10H16O	0	33.5	neg
neg_1572	Lobucavir	metab_8391	9.85e-07	4.67e-06	1.2903	1.2873	1.4782	0.5639	yes	-	-	-	-	-	-	-	HMDB0254142	Organoheterocyclic compounds	Imidazopyrimidines	Purines and purine derivatives	-	286.091	3.50913	M+Na-2H	C11H15N5O3	0	46.7	neg
neg_5392	N-Phenethylacetamide	metab_12618	1.72e-06	7.19e-06	1.2901	1.296	1.4733	0.559	yes	C06746	-	-	-	-	-	-	HMDB0255222	Organic acids and derivatives	Carboxylic acids and derivatives	Carboxylic acid derivatives	-	208.097	5.24413	M+FA-H	C10H13NO	0	33.6	neg
neg_4319	13,14-Dihydro-15-keto-PGE2	metab_11429	2.33e-09	5.6e-08	1.2895	1.2879	1.2896	0.367	yes	C04671	-	-	-	-	-	-	LMFA03010031;HMDB0002776	Lipids and lipid-like molecules	Fatty Acyls	Eicosanoids	363-23-5	351.221	6.60152	M-H	C20H32O5	70.3	0	neg
neg_2685	2-Nonene-1,4-diol	metab_9623	2.4e-05	6.29e-05	1.2894	1.2815	1.6445	0.7176	yes	-	-	-	-	-	-	-	HMDB0245271	Lipids and lipid-like molecules	Fatty Acyls	Fatty alcohols	-	203.128	5.24413	M+FA-H	C9H18O2	0	30.6	neg
neg_4719	Decanedioic acid	metab_11872	6.24e-05	0.0001417	1.2886	1.2797	1.4495	0.5355	yes	C08277	-	-	-	-	-	-	LMFA01170006;HMDB0000792	Lipids and lipid-like molecules	Fatty Acyls	Fatty acids and conjugates	111-20-6	201.113	6.04047	M-H	C10H18O4	86.3	0	neg
neg_5395	Arecoline	metab_12621	8.3e-07	4.09e-06	1.2884	1.2881	1.4997	0.5847	yes	C10129	-	-	-	-	-	-	HMDB0030353	Alkaloids and derivatives	Not Available	Not Available	63-75-2	136.076	5.2363	M-H2O-H	C8H13NO2	0	39.4	neg
neg_2158	18-Oxocortisol	metab_9041	8.02e-06	2.49e-05	1.2882	1.291	0.6509	-0.6194	yes	-	-	-	-	-	-	-	HMDB0000332;LMST02030194	Lipids and lipid-like molecules	Steroids and steroid derivatives	Hydroxysteroids	2410-60-8	397.161	4.28123	M+Na-2H	C21H28O6	0	52.2	neg
neg_2301	Viloxazine	metab_9200	1.37e-05	3.89e-05	1.2881	1.2822	0.6486	-0.6247	yes	-	-	-	-	-	-	-	HMDB0259807	Benzenoids	Phenol ethers	Not Available	-	473.261	4.52827	2M-H	C13H19NO3	0	30.5	neg
pos_3492	Taurochenodeoxycholic Acid	metab_2749	0.0005603	0.0009564	1.287	1.2962	0.7658	-0.3849	yes	C05465	-	-	map04976;map04979;map00121;map00120	Bile secretion;Cholesterol metabolism;Secondary bile acid biosynthesis;Primary bile acid biosynthesis	Organismal Systems;Organismal Systems;Metabolism;Metabolism	Digestive system;Digestive system;Lipid metabolism;Lipid metabolism	HMDB0000951;LMST05040005;HMDB0242411;HMDB0000949;MJDBOTE0001075	Lipids and lipid-like molecules	Steroids and steroid derivatives	Bile acids, alcohols and derivatives	516-35-8;53-02-1	517.33	6.25773	M+NH4	C26H45NO6S	66.6	0	pos
neg_2840	2-Propenoic acid, 2-methyl-, 7-oxabicyclo[4.1.0]hept-3-ylmethyl ester	metab_9795	2.97e-06	1.12e-05	1.2867	1.2802	1.4374	0.5234	yes	-	-	-	-	-	-	-	HMDB0247495	Organoheterocyclic compounds	Oxepanes	Not Available	-	241.108	5.4947	M+FA-H	C11H16O3	0	32.4	neg
pos_6685	Glu Leu Ala	metab_6264	3.78e-07	1.64e-06	1.2864	1.2855	0.7458	-0.4232	yes	-	-	-	-	-	-	-	-	-	-	-	-	332.182	3.16903	M+H	C14H25N3O6	37.4	0	pos
pos_5593	Glutethimide	metab_5057	0.03129	0.03841	1.286	1.3126	0.4771	-1.0676	yes	C07489	-	-	-	-	-	-	HMDB0015505	Organoheterocyclic compounds	Piperidines	Phenylpiperidines	77-21-4	250.144	5.06575	M+CH3OH+H	C13H15NO2	0	45.2	pos
pos_6826	Cyclo(glycylleucylvalylleucylprolylseryl)	metab_6420	6.61e-10	1.65e-08	1.286	1.2881	0.7539	-0.4075	yes	-	-	-	-	-	-	-	HMDB0303709	Organic acids and derivatives	Carboxylic acids and derivatives	Amino acids, peptides, and analogues	-	611.315	2.97735	M+2Na-H	C27H46N6O7	0	66.1	pos
pos_5468	Melilotoside D	metab_4919	1.83e-07	9.13e-07	1.2855	1.2874	0.6984	-0.5179	yes	-	-	-	-	-	-	-	HMDB0041467	Lipids and lipid-like molecules	Prenol lipids	Triterpenoids	172659-13-1	538.277	5.30577	M+2Na	C52H86O20	0	56.8	pos
neg_3152	N-[(3a,5b,7b)-7-hydroxy-24-oxo-3-(sulfooxy)cholan-24-yl]-Glycine	metab_10139	1.74e-07	1.21e-06	1.285	1.2823	0.7737	-0.3702	yes	-	-	-	-	-	-	-	HMDB0002409	Lipids and lipid-like molecules	Steroids and steroid derivatives	Cholestane steroids	133429-88-6	510.253	5.9627	M-H2O-H	C26H43NO8S	0	51.2	neg
pos_5549	Xanthoxylin	metab_5008	8.45e-05	0.0001776	1.2847	1.293	0.6971	-0.5206	yes	C10726	-	-	-	-	-	-	HMDB0029645	Organic oxygen compounds	Organooxygen compounds	Carbonyl compounds	90-24-4	238.107	5.15375	M+ACN+H	C10H12O4	0	38.6	pos
pos_6718	Neopterin	metab_6301	5.65e-06	1.67e-05	1.2839	1.2774	1.4708	0.5566	yes	C05926	-	-	map00790	Folate biosynthesis	Metabolism	Metabolism of cofactors and vitamins	HMDB0000727;HMDB0000845;PW_C000673;HMDB0000877	Organoheterocyclic compounds	Pteridines and derivatives	Pterins and derivatives	10162-32-0;2009-64-5;2277-42-1	276.069	3.12118	M+Na	C9H11N5O4	0	37.5	pos
neg_3979	LysoPS(16:0/0:0)	metab_11051	1.32e-05	3.78e-05	1.2839	1.2836	0.708	-0.4981	yes	-	-	-	-	-	-	-	HMDB0240605	Lipids and lipid-like molecules	Glycerophospholipids	Glycerophosphoserines	116947-34-3	496.272	7.57797	M-H	C22H44NO9P	0	66.6	neg
pos_5528	Scopolamine	metab_4985	4.87e-08	3.21e-07	1.2834	1.2856	1.4219	0.5078	yes	C01851	-	-	map01100;map00960;map01064;map01110	Metabolic pathways;Tropane, piperidine and pyridine alkaloid biosynthesis;Biosynthesis of alkaloids derived from ornithine, lysine and nicotinic acid;Biosynthesis of secondary metabolites	Metabolism;Metabolism;Metabolism;Metabolism	Global and overview maps;Biosynthesis of other secondary metabolites;Chemical structure transformation maps;Global and overview maps	HMDB0003573;MJDBOTE0001028	Organic acids and derivatives	Hydroxy acids and derivatives	Beta hydroxy acids and derivatives	51-34-3	321.18	5.19377	M+NH4	C17H21NO4	0	57.1	pos
pos_2262	Trp Asn	metab_1395	5.29e-08	3.42e-07	1.2832	1.2847	0.6816	-0.5529	yes	-	-	-	-	-	-	-	-	-	-	-	-	319.14	3.08088	M+H	C15H18N4O4	58.1	0	pos
neg_6157	Diethyloxalpropionate	metab_13466	0.0001089	0.0002291	1.2829	1.2726	1.5114	0.5959	yes	-	-	-	-	-	-	-	-	-	-	-	-	201.076	4.12383	M-H	C9H14O5	57.1	0	neg
pos_3284	(+/-)-Metalaxyl	metab_2521	3.08e-09	4.65e-08	1.2822	1.2805	1.313	0.3928	yes	C10947	-	-	-	-	-	-	HMDB0031802	Organic acids and derivatives	Carboxylic acids and derivatives	Amino acids, peptides, and analogues	-	343.164	5.85985	M+ACN+Na	C15H21NO4	0	34.2	pos
pos_3494	Glycohyocholic Acid	metab_2751	9.6e-05	0.0001993	1.2812	1.2903	0.7485	-0.4179	yes	-	-	-	-	-	-	-	HMDB0242179;HMDB0240607;MJDBDZS0000030	Lipids and lipid-like molecules	Steroids and steroid derivatives	Bile acids, alcohols and derivatives	32747-08-3	466.316	6.26568	M+H	C26H43NO6	30.3	0	pos
neg_3652	LysoPE(0:0/20:0)	metab_10692	9.08e-09	1.43e-07	1.281	1.2835	0.7241	-0.4658	yes	-	-	-	-	-	-	-	HMDB0011481	Lipids and lipid-like molecules	Glycerophospholipids	Glycerophosphoethanolamines	-	554.346	7.10098	M+FA-H	C25H52NO7P	0	42	neg
pos_1862	N-Acetyl-1-methylhistidine	metab_955	5.9e-06	1.73e-05	1.2809	1.2784	1.4658	0.5517	yes	-	-	-	-	-	-	-	HMDB0240340	Organic acids and derivatives	Carboxylic acids and derivatives	Amino acids, peptides, and analogues	84285-33-6	212.103	1.28652	M+H	C9H13N3O3	0	44.9	pos
pos_1877	N-Ribosylhistidine	metab_970	2.47e-08	1.94e-07	1.2803	1.2826	0.6998	-0.515	yes	-	-	-	-	-	-	-	HMDB0002089	Organic acids and derivatives	Carboxylic acids and derivatives	Amino acids, peptides, and analogues	98379-91-0	320.145	1.39013	M+CH3OH+H	C11H17N3O6	0	75.7	pos
pos_2190	Galactaric acid	metab_7720	7.75e-06	2.19e-05	1.2797	1.2872	0.7245	-0.4649	yes	C00879	-	-	map01100;map00053	Metabolic pathways;Ascorbate and aldarate metabolism	Metabolism;Metabolism	Global and overview maps;Carbohydrate metabolism	LMFA01050532;LMFA01170107;HMDB0000639	Organic oxygen compounds	Organooxygen compounds	Carbohydrates and carbohydrate conjugates	526-99-8	252.073	2.9455	M+ACN+H	C6H10O8	0	41.6	pos
neg_282	AB-Chminaca	metab_9772	0.0001706	0.00034	1.2796	1.2831	0.7082	-0.4978	yes	-	-	-	-	-	-	-	HMDB0247738	Organic acids and derivatives	Carboxylic acids and derivatives	Amino acids, peptides, and analogues	-	377.193	4.63315	M+Na-2H, M+K-2H	C20H28N4O2	0	40.6	neg
neg_391	6-Keto-prostaglandin F1a	metab_10975	1.38e-08	1.86e-07	1.2795	1.279	1.3437	0.4262	yes	C05961	-	-	map00590;map01100	Arachidonic acid metabolism;Metabolic pathways	Metabolism;Metabolism	Lipid metabolism;Global and overview maps	PW_C001726;HMDB0002886	Lipids and lipid-like molecules	Fatty Acyls	Eicosanoids	58962-34-8	351.218	5.93142	M-H2O-H, M-H	C20H34O6	0	34.4	neg
pos_2036	5-Methyl-2'-o-Methylcytidine	metab_1148	1.37e-06	4.91e-06	1.2794	1.2742	1.3721	0.4564	yes	-	-	-	-	-	-	-	-	-	-	-	-	272.124	2.636	M+H	C11H17N3O5	42.5	0	pos
pos_4796	Aglepristone	metab_4180	2.29e-07	1.09e-06	1.2777	1.2782	1.3596	0.4431	yes	-	-	-	-	-	-	-	HMDB0248061	Lipids and lipid-like molecules	Steroids and steroid derivatives	Oxosteroids	-	464.319	6.24203	M+CH3OH+H	C29H37NO2	0	51.8	pos
pos_2716	6-Hydroxytrtradeca-9,12-dienoylcarnitine	metab_1895	9.23e-06	2.55e-05	1.2772	1.2697	0.6612	-0.5968	yes	-	-	-	-	-	-	-	HMDB0241387	Lipids and lipid-like molecules	Fatty Acyls	Fatty acid esters	-	447.281	4.13265	M+ACN+Na	C21H37NO5	0	33.2	pos
pos_5380	N-Arachidonoyl Alanine	metab_4824	2.93e-05	6.94e-05	1.277	1.2748	1.4371	0.5231	yes	-	-	-	-	-	-	-	HMDB0241989;LMFA08020260	Organic acids and derivatives	Carboxylic acids and derivatives	Amino acids, peptides, and analogues	-	420.248	5.48247	M+2Na-H	C23H37NO3	0	42.6	pos
pos_4192	LysoPC(17:0/0:0)	metab_3515	0.0002316	0.0004362	1.2768	1.2682	0.7634	-0.3895	yes	C04230	Lipids	Phospholipids	map00564;map05231	Glycerophospholipid metabolism;Choline metabolism in cancer	Metabolism;Human Diseases	Lipid metabolism;Cancer: overview	HMDB0012108	Lipids and lipid-like molecules	Glycerophospholipids	Glycerophosphocholines	50930-23-9	510.355	7.3943	M+H	C25H52NO7P	0	79.9	pos
neg_7278	Citric Acid	metab_14703	2.45e-06	9.54e-06	1.2764	1.2771	0.7246	-0.4647	yes	C00158	Organic acids	Carboxylic acids	map00997;map01240;map01200;map01110;map00020;map00630;map04922;map01066;map01065;map01064;map01063;map01062;map01061;map01060;map01100;map01120;map01210;map01230;map04742;map00720;map02020;map01053;map00250;map05230;map01070	Biosynthesis of various secondary metabolites - part 3;Biosynthesis of cofactors;Carbon metabolism;Biosynthesis of secondary metabolites;Citrate cycle (TCA cycle);Glyoxylate and dicarboxylate metabolism;Glucagon signaling pathway;Biosynthesis of alkaloids derived from terpenoid and polyketide;Biosynthesis of alkaloids derived from histidine and purine;Biosynthesis of alkaloids derived from ornith…	Metabolism;Metabolism;Metabolism;Metabolism;Metabolism;Metabolism;Organismal Systems;Metabolism;Metabolism;Metabolism;Metabolism;Metabolism;Metabolism;Metabolism;Metabolism;Metabolism;Metabolism;Metabolism;Organismal Systems;Metabolism;Environmental Information Processing;Metabolism;Metabolism;Human Diseases;Metabolism	Biosynthesis of other secondary metabolites;Global and overview maps;Global and overview maps;Global and overview maps;Carbohydrate metabolism;Carbohydrate metabolism;Endocrine system;Chemical structure transformation maps;Chemical structure transformation maps;Chemical structure transformation maps;Chemical structure transformation maps;Chemical structure transformation maps;Chemical structure t…	PW_C000063;HMDB0000094;MJDBNL00000139	Organic acids and derivatives	Carboxylic acids and derivatives	Tricarboxylic acids and derivatives	77-92-9	191.019	1.479	M-H	C6H8O7	75.8	0	neg
pos_2066	Exaprolol	metab_1180	3.17e-05	7.43e-05	1.2763	1.2755	1.4151	0.5009	yes	-	-	-	-	-	-	-	HMDB0252141	Benzenoids	Phenol ethers	Not Available	-	314.207	2.70817	M+Na	C18H29NO2	0	34.4	pos
pos_5886	Methoxamine	metab_5379	1.94e-05	4.86e-05	1.2757	1.2749	1.3671	0.4511	yes	C07513	-	-	-	-	-	-	HMDB0014861	Benzenoids	Benzene and substituted derivatives	Methoxybenzenes	390-28-3	212.128	4.4552	M+H	C11H17NO3	41.3	0	pos
pos_3421	Soyasapogenol F	metab_2672	0.0001951	0.0003745	1.275	1.2677	1.3819	0.4666	yes	C17421	-	-	-	-	-	-	HMDB0039212	Lipids and lipid-like molecules	Prenol lipids	Triterpenoids	97503-03-2;104033-83-2	481.363	6.1152	M+Na	C30H50O3	0	70.4	pos
pos_5288	Urobilinogen	metab_7754	2.04e-06	6.91e-06	1.2735	1.2728	1.3472	0.43	yes	C05790	-	-	map00860	Porphyrin and chlorophyll metabolism	Metabolism	Metabolism of cofactors and vitamins	HMDB0001898;HMDB0004158	Organoheterocyclic compounds	Tetrapyrroles and derivatives	Bilirubins	17208-65-0;14684-37-8	623.343	5.69948	M+CH3OH+H	C33H42N4O6	0	62.7	pos
neg_761	Prolyl-Histidine	metab_15069	0.0005064	0.0009054	1.2734	1.2614	1.4599	0.5458	yes	-	-	-	-	-	-	-	HMDB0029019	Organic acids and derivatives	Carboxylic acids and derivatives	Amino acids, peptides, and analogues	-	233.103	3.87193	M-H2O-H, M+Na-2H	C11H16N4O3	0	39.1	neg
pos_7388	Niacinamide	metab_7038	0.0003383	0.000613	1.2731	1.2755	1.454	0.54	yes	C00153	Vitamins and cofactors	Vitamins	map01100;map04212;map01240;map04977;map00760	Metabolic pathways;Longevity regulating pathway - worm;Biosynthesis of cofactors;Vitamin digestion and absorption;Nicotinate and nicotinamide metabolism	Metabolism;Organismal Systems;Metabolism;Organismal Systems;Metabolism	Global and overview maps;Aging;Global and overview maps;Digestive system;Metabolism of cofactors and vitamins	PW_C001086;HMDB0001406	Organoheterocyclic compounds	Pyridines and derivatives	Pyridinecarboxylic acids and derivatives	98-92-0	123.055	1.25467	M+H	C6H6N2O	56.5	0	pos
neg_7149	Indole-3-glycol aldehyde	metab_14562	1.26e-08	1.8e-07	1.273	1.2752	0.6596	-0.6004	yes	C03230	-	-	map01100;map00380	Metabolic pathways;Tryptophan metabolism	Metabolism;Metabolism	Global and overview maps;Amino acid metabolism	HMDB0304393	Organoheterocyclic compounds	Indoles and derivatives	Indoles	-	349.118	2.83418	2M-H	C10H9NO2	0	35.3	neg
neg_6192	MPPa (Methyl pyropheophorbide-a)	metab_13504	1.72e-08	2.18e-07	1.2729	1.2748	0.6916	-0.532	yes	-	-	-	-	-	-	-	HMDB0254917	Not Available	Not Available	Not Available	-	529.263	4.08403	M-H2O-H	C34H36N4O3	0	59.6	neg
pos_2411	H-Gly-Arg-Gly-Asp-D-Ser-Pro-OH	metab_1560	6.2e-10	1.58e-08	1.2728	1.2751	0.7345	-0.4452	yes	-	-	-	-	-	-	-	HMDB0253013	Organic acids and derivatives	Carboxylic acids and derivatives	Amino acids, peptides, and analogues	-	651.283	3.40807	M+ACN+Na	C22H37N9O10	0	48	pos
pos_1351	Taurohyocholic Acid	metab_391	2.45e-05	5.92e-05	1.2724	1.2624	0.7928	-0.3349	yes	C15516	-	-	-	-	-	-	LMST05040010;HMDB0011637;MJDBDZS0000018	Lipids and lipid-like molecules	Steroids and steroid derivatives	Bile acids, alcohols and derivatives	117997-17-8	516.299	5.99563	M+H, 2M+H	C26H45NO7S	81.9	0	pos
neg_6012	3,6-Ditigloyloxytropan-7-ol	metab_13306	1.11e-08	1.66e-07	1.2722	1.2747	0.6719	-0.5738	yes	-	-	-	-	-	-	-	HMDB0029325	Alkaloids and derivatives	Tropane alkaloids	Not Available	7159-86-6	358.162	4.31257	M+Na-2H	C18H27NO5	0	31.9	neg
pos_6558	Ile Ile Asn	metab_6124	7.31e-10	1.76e-08	1.2721	1.2744	0.713	-0.4881	yes	-	-	-	-	-	-	-	-	-	-	-	-	359.229	3.34438	M+H	C16H30N4O5	40.2	0	pos
neg_6693	Glutaminyltryptophan	metab_14057	9.13e-07	4.38e-06	1.272	1.2713	0.7154	-0.4831	yes	-	-	-	-	-	-	-	HMDB0028808	Organic acids and derivatives	Carboxylic acids and derivatives	Amino acids, peptides, and analogues	66851-83-0	331.141	3.55663	M-H	C16H20N4O4	0	43.6	neg
pos_2201	Strictosidine	metab_1329	1.48e-09	2.75e-08	1.2719	1.2743	0.7359	-0.4424	yes	C03470	-	-	map01100;map01110;map01063;map00901;map01060	Metabolic pathways;Biosynthesis of secondary metabolites;Biosynthesis of alkaloids derived from shikimate pathway;Indole alkaloid biosynthesis;Biosynthesis of plant secondary metabolites	Metabolism;Metabolism;Metabolism;Metabolism;Metabolism	Global and overview maps;Global and overview maps;Chemical structure transformation maps;Biosynthesis of other secondary metabolites;Chemical structure transformation maps	HMDB0304492	Lipids and lipid-like molecules	Prenol lipids	Terpene glycosides	20824-29-7	548.256	2.95345	M+NH4	C27H34N2O9	0	55	pos
neg_4408	8-Nonen-2-one	metab_11528	5.04e-06	1.71e-05	1.2717	1.2763	0.7236	-0.4668	yes	-	-	-	-	-	-	-	HMDB0035926;LMFA12000145	Organic oxygen compounds	Organooxygen compounds	Carbonyl compounds	5009-32-5	279.233	6.48417	2M-H	C9H16O	0	54.3	neg
neg_6663	3-Amino-2,3-dihydrobenzoic acid	metab_14024	1.64e-09	4.67e-08	1.2716	1.2709	1.3895	0.4745	yes	C12110	-	-	-	-	-	-	HMDB0251519	Organic acids and derivatives	Carboxylic acids and derivatives	Amino acids, peptides, and analogues	87980-11-8	184.061	3.58797	M+FA-H	C7H9NO2	0	56.7	neg
pos_4397	Risbitin	metab_3741	1.74e-05	4.44e-05	1.2712	1.2675	0.7703	-0.3766	yes	C09715	-	-	-	-	-	-	HMDB0302980	Organic oxygen compounds	Organooxygen compounds	Alcohols and polyols	-	508.34	6.8064	2M+ACN+Na	C14H22O2	0	51.8	pos
neg_2499	9-Oxo-nonanoic acid	metab_9416	0.0004325	0.000782	1.2711	1.2588	1.4989	0.5839	yes	C16322	-	-	map00592;map01110	alpha-Linolenic acid metabolism;Biosynthesis of secondary metabolites	Metabolism;Metabolism	Lipid metabolism;Global and overview maps	LMFA01060160;HMDB0094711	Lipids and lipid-like molecules	Fatty Acyls	Fatty acids and conjugates	-	217.108	4.91147	M+FA-H	C9H16O3	0	49	neg
pos_2356	(+)-Isofebrifugine	metab_1499	2.22e-07	1.06e-06	1.2711	1.267	1.3311	0.4126	yes	-	-	-	-	-	-	-	HMDB0242253	Organoheterocyclic compounds	Diazanaphthalenes	Benzodiazines	-	334.176	3.27318	M+CH3OH+H	C16H19N3O3	0	32.8	pos
neg_1656	Hippuric acid sulfate	metab_8484	1.58e-06	6.69e-06	1.2707	1.2777	0.6544	-0.6116	yes	-	-	-	-	-	-	-	HMDB0304910	Not Available	Not Available	Not Available	-	239.997	3.61147	M-H2O-H	C9H9NO6S	0	40.8	neg
pos_417	Arg Phe	metab_3491	5.55e-05	0.0001223	1.2706	1.2731	0.7072	-0.4998	yes	-	-	-	-	-	-	-	-	-	-	-	-	322.187	2.69222	M+2H, M+H	C15H23N5O3	72.6	0	pos
neg_6287	Gibberellin A8-catabolite	metab_13607	3.49e-06	1.26e-05	1.2703	1.2674	1.5142	0.5986	yes	C11870	-	-	map00904	Diterpenoid biosynthesis	Metabolism	Metabolism of terpenoids and polyketides	HMDB0304364;LMPR0104170027	Lipids and lipid-like molecules	Prenol lipids	Diterpenoids	78791-79-4	399.086	3.98152	M+K-2H	C19H22O7	0	48.1	neg
neg_1977	CGP71422	metab_8840	3.98e-09	8.17e-08	1.2701	1.2705	0.675	-0.5669	yes	-	-	-	-	-	-	-	HMDB0013864	Benzenoids	Benzene and substituted derivatives	Anilides	-	490.234	4.037	M-H2O-H	C29H31N7O2	0	60.9	neg
pos_6727	11-beta-Hydroxyandrosterone-3-glucuronide	metab_7694	3.94e-09	5.55e-08	1.2691	1.2709	0.707	-0.5002	yes	C05643	-	-	map00380	Tryptophan metabolism	Metabolism	Amino acid metabolism	HMDB0010351;LMST05010055;LMST05010030	Organoheterocyclic compounds	Indoles and derivatives	Hydroxyindoles	-	500.283	3.1052	M+NH4	C25H38O9	0	35.4	pos
pos_3496	Stercobilin	metab_2753	8.97e-05	0.0001875	1.2685	1.2657	1.3031	0.382	yes	C05793	-	-	map00860	Porphyrin and chlorophyll metabolism	Metabolism	Metabolism of cofactors and vitamins	HMDB0240259	Organoheterocyclic compounds	Tetrapyrroles and derivatives	Bilirubins	34217-90-8	595.348	6.26568	M+H	C33H46N4O6	63.8	0	pos
neg_5758	Flecainide	metab_13023	1.62e-07	1.15e-06	1.2678	1.2728	0.6683	-0.5813	yes	C07001	-	-	-	-	-	-	HMDB0015326;PW_C009608	Benzenoids	Benzene and substituted derivatives	Benzoic acids and derivatives	54143-55-4	395.121	4.65618	M-H2O-H	C17H20F6N2O3	0	43	neg
pos_5872	Tetranorprostanedioic acid	metab_5364	0.01553	0.02004	1.2677	1.2519	1.7029	0.768	yes	-	-	-	-	-	-	-	HMDB0258926	Lipids and lipid-like molecules	Fatty Acyls	Fatty acids and conjugates	-	302.232	4.4792	M+NH4	C16H28O4	0	38.8	pos
neg_4297	Deca-Durabolin	metab_15372	3.4e-06	1.24e-05	1.2671	1.2605	1.4074	0.493	yes	C08154	-	-	-	-	-	-	HMDB0002725;HMDB0015694;HMDB0250911	Lipids and lipid-like molecules	Steroids and steroid derivatives	Estrane steroids	434-22-0;360-70-3	473.327	6.6328	M+FA-H	C28H44O3	0	45.1	neg
pos_32	Tauroursodeoxycholic acid	metab_2430	1.7e-11	1.49e-09	1.2671	1.2676	0.7971	-0.3271	yes	C16868	-	-	-	-	-	-	LMST05040015;HMDB0000874	Lipids and lipid-like molecules	Steroids and steroid derivatives	Bile acids, alcohols and derivatives	14605-22-2	464.282	6.0993	M+H-2H2O, M+H, M+Na, M+NH4	C26H45NO6S	0	66	pos
pos_5219	Leu Phe Leu	metab_4646	0.0004045	0.0007191	1.2668	1.2544	0.71	-0.494	yes	-	-	-	-	-	-	-	-	-	-	-	-	392.254	5.83597	M+H	C21H33N3O4	74.9	0	pos
neg_5310	9alpha-(3-Methylbutanoyloxy)-4S-hydroxy-10(14)-oplopen-3-one	metab_12528	2.64e-08	2.94e-07	1.2667	1.2675	1.3126	0.3925	yes	-	-	-	-	-	-	-	HMDB0039171	Lipids and lipid-like molecules	Prenol lipids	Sesquiterpenoids	348113-04-2	381.228	5.3423	M+FA-H	C20H32O4	0	38.3	neg
neg_4490	3alpha,7alpha,12alpha-trihydroxy-5beta-cholestanate	metab_11619	1.75e-09	4.89e-08	1.2661	1.2657	1.2921	0.3697	yes	C04722	-	-	map01100;map00120	Metabolic pathways;Primary bile acid biosynthesis	Metabolism;Metabolism	Global and overview maps;Lipid metabolism	HMDB0062207	Lipids and lipid-like molecules	Steroids and steroid derivatives	Bile acids, alcohols and derivatives	547-98-8	449.327	6.37492	M-H	C27H46O5	0	46.5	neg
pos_6188	Ile-Ile-Ile-Pro	metab_5715	5.84e-07	2.37e-06	1.2659	1.2619	0.7848	-0.3496	yes	-	-	-	-	-	-	-	HMDB0304800	Organic acids and derivatives	Carboxylic acids and derivatives	Amino acids, peptides, and analogues	-	493.281	3.91463	M+K	C23H42N4O5	0	45.5	pos
pos_5752	Kallidin	metab_5231	2.59e-09	4.04e-08	1.2658	1.2679	0.6983	-0.5182	yes	C01505	-	-	-	-	-	-	HMDB0253760	Organic Polymers	Polypeptides	Not Available	342-10-9	594.83	4.72837	M+2H	C56H85N17O12	0	49	pos
neg_5152	4-Hydroxyphenyl-2-propionic acid	metab_12353	0.0005201	0.0009264	1.2658	1.2553	1.6697	0.7396	yes	C03080	-	-	-	-	-	-	HMDB0041683	Phenylpropanoids and polyketides	Phenylpropanoic acids	Not Available	938-96-5	211.061	5.60102	M+FA-H	C9H10O3	0	37.8	neg
neg_1819	Yohimbine	metab_8665	7.84e-09	1.29e-07	1.2658	1.2682	0.7226	-0.4688	yes	C09256	-	-	-	-	-	-	HMDB0015464	Alkaloids and derivatives	Yohimbine alkaloids	Not Available	146-48-5	389.167	3.82435	M+Cl	C21H26N2O3	0	47.1	neg
neg_6246	5alpha-Hydroxytriptolide	metab_13562	8.04e-06	2.5e-05	1.2657	1.2633	1.5084	0.593	yes	-	-	-	-	-	-	-	HMDB0247016	Organoheterocyclic compounds	Oxepanes	Not Available	-	413.102	4.02917	M+K-2H	C20H24O7	0	52.6	neg
neg_2310	Lagociclovir	metab_9210	0.003947	0.005721	1.2655	1.2525	1.6302	0.7051	yes	-	-	-	-	-	-	-	HMDB0253955	Nucleosides, nucleotides, and analogues	Purine nucleosides	Purine 2'',3''-dideoxyribonucleosides	-	268.086	4.55177	M-H	C10H12FN5O3	0	30.6	neg
neg_4399	5alpha-Cyprinol	metab_11517	4.62e-11	5.05e-09	1.2647	1.2646	1.3066	0.3859	yes	C16890	-	-	-	-	-	-	HMDB0247015	Lipids and lipid-like molecules	Steroids and steroid derivatives	Bile acids, alcohols and derivatives	2952-70-7	433.332	6.49982	M-H2O-H	C27H48O5	0	57.9	neg
neg_5909	5-(3-Methyl-1-triazeno)imidazole-4-carboxamide	metab_13191	7.44e-07	3.74e-06	1.2647	1.2631	1.5437	0.6264	yes	C16250	-	-	map07040	Antineoplastics - alkylating agents	Drug Development	Chronology: Antineoplastics	HMDB0254938	Organic acids and derivatives	Carboxylic acids and derivatives	Carboxylic acid derivatives	-	203.046	4.45068	M+Cl	C5H8N6O	0	74.2	neg
neg_5637	Metyrapol	metab_12890	0.0001635	0.000328	1.264	1.2567	1.4574	0.5434	yes	-	-	-	-	-	-	-	HMDB0060605	Organoheterocyclic compounds	Pyridines and derivatives	Not Available	-	265.075	4.87225	M+K-2H	C14H16N2O	0	41.2	neg
neg_6599	4-(4-Nitrobenzyl)pyridine	metab_13952	8.5e-06	2.62e-05	1.2636	1.2586	1.5681	0.649	yes	-	-	-	-	-	-	-	HMDB0246294	Benzenoids	Benzene and substituted derivatives	Nitrobenzenes	-	249.044	3.65065	M+Cl	C12H10N2O2	0	34.2	neg
neg_3041	Apomine	metab_10017	1.87e-05	5.09e-05	1.2634	1.2664	1.4292	0.5152	yes	-	-	-	-	-	-	-	HMDB0248525	Organic acids and derivatives	Organic phosphonic acids and derivatives	Bisphosphonates	-	607.315	5.86867	M+FA-H	C28H52O7P2	0	52.3	neg
neg_6116	Alanylproline	metab_13421	0.0002156	0.0004189	1.2632	1.2615	0.6846	-0.5466	yes	-	-	-	-	-	-	-	HMDB0028695	Organic acids and derivatives	Carboxylic acids and derivatives	Amino acids, peptides, and analogues	13485-59-1	371.193	4.17083	2M-H	C8H14N2O3	0	43.5	neg
pos_6116	Indole-3-acetyl-isoleucine	metab_5636	1.69e-05	4.31e-05	1.263	1.2646	1.4329	0.5189	yes	-	-	-	-	-	-	-	HMDB0304382	Organic acids and derivatives	Carboxylic acids and derivatives	Amino acids, peptides, and analogues	-	351.155	4.01997	M+ACN+Na	C16H19N2O3-	0	53.3	pos
pos_892	1,2-Dihydronaphthalene-1,2-diol	metab_7575	5.14e-06	1.54e-05	1.2629	1.2606	1.317	0.3973	yes	C06205	-	-	map00980	Metabolism of xenobiotics by cytochrome P450	Metabolism	Xenobiotics biodegradation and metabolism	HMDB0060335	Benzenoids	Naphthalenes	Not Available	-	180.102	6.25773	M+H-H2O, M+NH4	C10H10O2	0	52.5	pos
pos_5078	S-(PGJ2)-glutathione	metab_4490	0.0107	0.01419	1.2629	1.2762	1.6345	0.7089	yes	-	-	-	-	-	-	-	HMDB0013063	Organic acids and derivatives	Carboxylic acids and derivatives	Amino acids, peptides, and analogues	-	659.328	5.99563	M+NH4	C30H47N3O10S	0	52.5	pos
pos_2134	Neamine	metab_1255	5.77e-05	0.0001266	1.2628	1.2615	0.7465	-0.4218	yes	C01441	-	-	map01110;map00524	Biosynthesis of secondary metabolites;Neomycin, kanamycin and gentamicin biosynthesis	Metabolism;Metabolism	Global and overview maps;Biosynthesis of other secondary metabolites	HMDB0255495	Organic oxygen compounds	Organooxygen compounds	Carbohydrates and carbohydrate conjugates	3947-65-7	386.203	2.81167	M+ACN+Na	C12H26N4O6	0	65.5	pos
neg_886	Asparaginyl-Proline	metab_15234	7.88e-07	3.91e-06	1.2622	1.2634	0.697	-0.5208	yes	-	-	-	-	-	-	-	HMDB0028739	Organic acids and derivatives	Carboxylic acids and derivatives	Amino acids, peptides, and analogues	-	517.227	3.53313	2M-H, 2M+Hac-H	C9H15N3O4	0	63	neg
neg_6569	Glu Asp Lys Glu	metab_13919	5.57e-08	5.11e-07	1.2615	1.2628	0.6878	-0.5399	yes	-	-	-	-	-	-	-	-	-	-	-	-	518.21	3.67417	M-H	C20H33N5O11	52.8	0	neg
pos_2791	Glu Val Ile Glu	metab_1978	0.0002489	0.0004645	1.2608	1.2652	0.6973	-0.5202	yes	-	-	-	-	-	-	-	-	-	-	-	-	489.255	4.35065	M+H	C21H36N4O9	42.2	0	pos
pos_150	Taurohyocholate	metab_556	2.12e-07	1.02e-06	1.2604	1.2559	0.8279	-0.2725	yes	C15516	-	-	-	-	-	-	LMST05040010;HMDB0011637	Lipids and lipid-like molecules	Steroids and steroid derivatives	Bile acids, alcohols and derivatives	117997-17-8	480.278	6.0035	M+H-2H2O, M+H-H2O, M+NH4	C26H45NO7S	0	76	pos
neg_208	3-Hydroxypropyl methacrylate	metab_8954	2.18e-05	5.82e-05	1.26	1.2519	1.4659	0.5518	yes	-	-	-	-	-	-	-	HMDB0245905	Organic acids and derivatives	Carboxylic acids and derivatives	Carboxylic acid derivatives	-	189.076	3.8563	M+Cl, M+FA-H	C7H12O3	0	39.6	neg
neg_1323	Glu Lys Ser Glu	metab_8116	0.001	0.001654	1.2586	1.2646	0.7236	-0.4668	yes	-	-	-	-	-	-	-	-	-	-	-	-	490.216	3.2331	M-H	C19H33N5O10	43.5	0	neg
neg_1927	Sinomenine	metab_8785	1.41e-08	1.91e-07	1.258	1.2602	0.7147	-0.4846	yes	C09643	-	-	-	-	-	-	HMDB0258305;MJDBOTE0001482	Alkaloids and derivatives	Morphinans	Not Available	115-53-7	350.136	3.96585	M+Na-2H	C19H23NO4	0	37.9	neg
neg_1207	3-Sulfodeoxycholic acid	metab_7987	8.14e-06	2.53e-05	1.2579	1.2543	1.4416	0.5276	yes	-	-	-	-	-	-	-	HMDB0002504;LMST05020038	Lipids and lipid-like molecules	Sphingolipids	Ceramides	67030-48-2	495.183	1.9333	M+K-2H	C23H38O7S	0	68	neg
pos_5204	Butralin	metab_4630	1.09e-06	4.03e-06	1.257	1.2532	1.2192	0.2859	yes	C18582	-	-	-	-	-	-	HMDB0249470	Benzenoids	Benzene and substituted derivatives	Aniline and substituted anilines	33629-47-9	591.318	5.85985	2M+H	C14H21N3O4	0	37.3	pos
pos_2869	Gamma-Glutamylglutamic acid	metab_2062	5.48e-05	0.000121	1.2566	1.2514	1.4522	0.5383	yes	C05282	-	-	-	-	-	-	HMDB0011737	Organic acids and derivatives	Carboxylic acids and derivatives	Amino acids, peptides, and analogues	1116-22-9	299.085	4.55975	M+Na	C10H16N2O7	0	42.4	pos
neg_6258	Acetyl-Ser-Asp-Lys-Pro	metab_13575	4.18e-08	4.12e-07	1.2564	1.2582	0.69	-0.5353	yes	-	-	-	-	-	-	-	HMDB0247929	Organic acids and derivatives	Carboxylic acids and derivatives	Amino acids, peptides, and analogues	-	486.221	4.01348	M-H	C20H33N5O9	0	82.5	neg
pos_3589	27-Norcholestanehexol	metab_2853	0.0001174	0.0002375	1.2561	1.2486	1.3682	0.4523	yes	-	-	-	-	-	-	-	LMST04020029;HMDB0002157	Lipids and lipid-like molecules	Steroids and steroid derivatives	Bile acids, alcohols and derivatives	91999-66-5	419.315	6.59972	M+H-2H2O	C26H46O6	0	72.8	pos
pos_6357	Tetracosahexaenoic acid, n-3	metab_5903	7.25e-08	4.32e-07	1.2556	1.2601	0.7186	-0.4768	yes	-	-	-	-	-	-	-	HMDB0060117	Lipids and lipid-like molecules	Fatty Acyls	Fatty acids and conjugates	-	401.239	3.63312	M+2Na-H	C24H36O2	0	41.6	pos
neg_2275	L-Histidine	metab_9170	0.004723	0.006745	1.2553	1.2431	1.6992	0.7648	yes	C00135	Peptides	Amino acids	map01100;map01110;map05230;map00340;map02010;map01230;map04974;map00970;map01065;map00410;map00404;map01060	Metabolic pathways;Biosynthesis of secondary metabolites;Central carbon metabolism in cancer;Histidine metabolism;ABC transporters;Biosynthesis of amino acids;Protein digestion and absorption;Aminoacyl-tRNA biosynthesis;Biosynthesis of alkaloids derived from histidine and purine;beta-Alanine metabolism;Staurosporine biosynthesis;Biosynthesis of plant secondary metabolites	Metabolism;Metabolism;Human Diseases;Metabolism;Environmental Information Processing;Metabolism;Organismal Systems;Genetic Information Processing;Metabolism;Metabolism;Metabolism;Metabolism	Global and overview maps;Global and overview maps;Cancer: overview;Amino acid metabolism;Membrane transport;Global and overview maps;Digestive system;Translation;Chemical structure transformation maps;Metabolism of other amino acids;Biosynthesis of other secondary metabolites;Chemical structure transformation maps	PW_C000116;HMDB0000177;MJDBOTE0000427	Organic acids and derivatives	Carboxylic acids and derivatives	Amino acids, peptides, and analogues	71-00-1	154.061	4.49385	M-H	C6H9N3O2	94.4	0	neg
pos_5181	Ripisartan	metab_4605	6.51e-05	0.0001411	1.255	1.2442	1.4069	0.4925	yes	-	-	-	-	-	-	-	HMDB0257241	Benzenoids	Benzene and substituted derivatives	Biphenyls and derivatives	-	459.223	5.8918	M+CH3OH+H	C23H22N8O	0	36.3	pos
pos_3659	7alpha,12alpha-Dihydroxycholest-4-en-3-one	metab_2929	1.1e-07	6.08e-07	1.2548	1.2527	1.2981	0.3764	yes	C17339	-	-	map01100;map00120	Metabolic pathways;Primary bile acid biosynthesis	Metabolism;Metabolism	Global and overview maps;Lipid metabolism	HMDB0247407;LMST04030114	Lipids and lipid-like molecules	Steroids and steroid derivatives	Cholestane steroids	-	399.325	6.82223	M+H-H2O	C27H44O3	0	49.5	pos
neg_5520	Leucomycin	metab_12761	2.44e-08	2.78e-07	1.2548	1.2568	0.7069	-0.5005	yes	C14064	-	-	-	-	-	-	HMDB0254035	Organic oxygen compounds	Organooxygen compounds	Carbohydrates and carbohydrate conjugates	1392-21-8	682.378	5.03957	M-H2O-H	C35H59NO13	0	76	neg
pos_120	Deoxycholyl-L-dopa	metab_223	0.005457	0.007603	1.2545	1.2684	0.7444	-0.4259	yes	-	-	-	-	-	-	-	HMDB0242439	Not Available	Not Available	Not Available	-	572.358	6.27367	M+H-2H2O, M+H, M+H-H2O	C33H49NO7	0	47.9	pos
neg_5297	Forskolin	metab_15375	0.0005592	0.0009849	1.254	1.2602	0.73	-0.454	yes	C09076	-	-	-	-	-	-	LMPR0104030004;HMDB0032064;HMDB0252457;MJDBOTE0001052	Organoheterocyclic compounds	Benzofurans	Benzofuranones	66575-29-9;3413-15-8	391.209	5.36485	M-H2O-H	C22H34O7	0	55.1	neg
pos_5279	MG(0:0/i-18:0/0:0)	metab_4712	0.01018	0.01356	1.2537	1.2447	1.528	0.6116	yes	-	-	-	-	-	-	-	HMDB0072877	Lipids and lipid-like molecules	Glycerolipids	Monoradylglycerols	-	397.269	5.72348	M+K	C21H42O4	0	67.2	pos
pos_5150	Norhydromorphone	metab_4571	5.79e-07	2.36e-06	1.2523	1.2494	1.4356	0.5216	yes	-	-	-	-	-	-	-	HMDB0014004	Alkaloids and derivatives	Morphinans	Not Available	-	289.154	5.93182	M+NH4	C16H17NO3	0	33.1	pos
neg_4618	Monoketocholic acid	metab_11761	6.58e-08	5.78e-07	1.2522	1.2527	1.2952	0.3731	yes	-	-	-	-	-	-	-	HMDB0254862	Lipids and lipid-like molecules	Steroids and steroid derivatives	Bile acids, alcohols and derivatives	-	421.259	6.1884	M-H	C24H38O6	0	70.8	neg
neg_1755	Gabazine	metab_8594	1.72e-05	4.75e-05	1.2519	1.2524	0.7489	-0.4171	yes	C13796	-	-	-	-	-	-	HMDB0252568	Organoheterocyclic compounds	Diazines	Pyridazines and derivatives	-	332.125	3.73752	M+FA-H	C15H17N3O3	0	57.3	neg
pos_260	13(S)-HOTrE	metab_1769	1.75e-05	4.45e-05	1.2513	1.2471	1.3673	0.4513	yes	C16316	-	-	map00592	alpha-Linolenic acid metabolism	Metabolism	Lipid metabolism	-	-	-	-	-	277.216	7.80733	M+H-H2O, M+Na, M+H	C18H30O3	67	0	pos
neg_7443	Carnosine	metab_14884	1.57e-08	2.07e-07	1.2508	1.2531	0.7083	-0.4976	yes	C00386	Peptides	Peptides	map01100;map00340;map00410	Metabolic pathways;Histidine metabolism;beta-Alanine metabolism	Metabolism;Metabolism;Metabolism	Global and overview maps;Amino acid metabolism;Metabolism of other amino acids	PW_C000023;HMDB0000033;MJDBOTE0000496	Organic acids and derivatives	Peptidomimetics	Hybrid peptides	305-84-0	225.099	0.8913	M-H	C9H14N4O3	32.1	0	neg
pos_7134	His Leu	metab_6762	7.9e-06	2.22e-05	1.2503	1.2491	0.7714	-0.3745	yes	-	-	-	-	-	-	-	-	-	-	-	-	269.161	2.636	M+H	C12H20N4O3	76	0	pos
neg_1978	N-[(3a,5b,7a,12a)-3,12-dihydroxy-24-oxo-7-(sulfooxy)cholan-24-yl]-Glycine	metab_8841	7.92e-08	6.65e-07	1.2501	1.2515	0.6918	-0.5315	yes	-	-	-	-	-	-	-	HMDB0002640	Lipids and lipid-like molecules	Steroids and steroid derivatives	Bile acids, alcohols and derivatives	71977-73-6	544.262	4.037	M-H	C26H43NO9S	0	76.6	neg
pos_3580	Estragole	metab_2844	8.93e-10	2e-08	1.2499	1.2508	1.2894	0.3667	yes	C10452	-	-	map00940	Phenylpropanoid biosynthesis	Metabolism	Biosynthesis of other secondary metabolites	HMDB0034121;MJDBOTE0001746	Benzenoids	Phenol ethers	Anisoles	140-67-0	149.096	6.5759	M+H	C10H12O	37.2	0	pos
neg_6873	Quinol glucuronide	metab_14256	0.000156	0.0003144	1.2498	1.2496	1.4427	0.5287	yes	-	-	-	-	-	-	-	HMDB0259508	Organic oxygen compounds	Organooxygen compounds	Carbohydrates and carbohydrate conjugates	-	285.062	3.38312	M-H	C12H14O8	0	32.1	neg
neg_6063	Tyrosine lactate	metab_13362	2.73e-05	7.04e-05	1.2498	1.2504	0.7205	-0.4728	yes	-	-	-	-	-	-	-	HMDB0259352	Organic acids and derivatives	Carboxylic acids and derivatives	Amino acids, peptides, and analogues	-	252.088	4.23352	M-H	C12H15NO5	0	59.2	neg
neg_5182	Petromyzonol sulfate	metab_12386	2.34e-07	1.52e-06	1.2496	1.2513	0.7011	-0.5124	yes	-	-	-	-	-	-	-	HMDB0256356	Lipids and lipid-like molecules	Steroids and steroid derivatives	Bile acids, alcohols and derivatives	-	473.262	5.5417	M-H	C24H42O7S	0	50.1	neg
neg_777	Tiamenidine	metab_15113	3.1e-07	1.9e-06	1.2496	1.245	1.2882	0.3653	yes	-	-	-	-	-	-	-	HMDB0259067	Organohalogen compounds	Aryl halides	Aryl chlorides	-	214.021	1.88633	M-H, M+FA-H	C8H10ClN3S	0	35	neg
pos_1438	Cytidine 2'-phosphate	metab_487	1.32e-07	7.02e-07	1.2495	1.2472	1.384	0.4689	yes	C03104	-	-	-	-	-	-	HMDB0011692	Organic oxygen compounds	Organooxygen compounds	Carbohydrates and carbohydrate conjugates	85-94-9	306.047	3.99532	M+H-H2O, M+H	C9H14N3O8P	0	38.2	pos
neg_7272	3'-Ketolactose	metab_14697	2.73e-06	1.04e-05	1.2495	1.2457	1.2868	0.3638	yes	C05403	-	-	-	-	-	-	HMDB0001030	Organic oxygen compounds	Organooxygen compounds	Carbohydrates and carbohydrate conjugates	15990-62-2	321.083	1.50247	M-H2O-H	C12H20O11	0	90.6	neg
neg_3061	Menthyl ethylene glycol carbonate	metab_10039	0.000543	0.0009607	1.2493	1.2364	1.4031	0.4886	yes	-	-	-	-	-	-	-	HMDB0036141	Lipids and lipid-like molecules	Prenol lipids	Monoterpenoids	156324-78-6	289.166	5.89217	M+FA-H	C13H24O4	0	40.5	neg
pos_2673	Beta-Zearalenol	metab_7708	7.14e-08	4.27e-07	1.2492	1.2499	0.7427	-0.4291	yes	C14751	-	-	-	-	-	-	HMDB0041824;HMDB0041838	Phenylpropanoids and polyketides	Macrolides and analogues	Not Available	36455-72-8;71030-11-0	663.32	4.01132	2M+Na	C18H24O5	0	32.4	pos
pos_7607	Gamma-glutamyl-L-putrescine	metab_7278	5e-06	1.51e-05	1.2492	1.2463	0.7577	-0.4004	yes	C15699	-	-	map01100;map00330	Metabolic pathways;Arginine and proline metabolism	Metabolism;Metabolism	Global and overview maps;Amino acid metabolism	HMDB0012230	Organic acids and derivatives	Carboxylic acids and derivatives	Amino acids, peptides, and analogues	-	218.15	0.76415	M+H	C9H19N3O3	0	32.1	pos
pos_3822	13,16,19-Docosatrienoic acid	metab_3107	3.23e-05	7.54e-05	1.2488	1.2549	0.6647	-0.5892	yes	C16534	-	-	-	-	-	-	LMFA01030407;HMDB0244522;HMDB0002823	Lipids and lipid-like molecules	Fatty Acyls	Fatty acids and conjugates	28845-86-5	357.279	7.61648	M+Na	C22H38O2	0	55.7	pos
pos_1224	Alpha-Linolenic acid	metab_250	1.87e-06	6.42e-06	1.2483	1.2448	1.2551	0.3278	yes	C06427	Lipids	Fatty acids	map01100;map01110;map00592;map01040;map01070;map01060	Metabolic pathways;Biosynthesis of secondary metabolites;alpha-Linolenic acid metabolism;Biosynthesis of unsaturated fatty acids;Biosynthesis of plant hormones;Biosynthesis of plant secondary metabolites	Metabolism;Metabolism;Metabolism;Metabolism;Metabolism;Metabolism	Global and overview maps;Global and overview maps;Lipid metabolism;Lipid metabolism;Chemical structure transformation maps;Chemical structure transformation maps	LMFA01030152;PW_C001073;HMDB0001388	Lipids and lipid-like molecules	Fatty Acyls	Lineolic acids and derivatives	463-40-1	279.232	6.28167	M+H-H2O, M+H	C18H30O2	0	54.8	pos
pos_3159	2,7-dihydroxy-4'-methoxyisoflavanone	metab_2385	2.91e-06	9.43e-06	1.2475	1.2419	1.3888	0.4738	yes	C16190	-	-	map00943	Isoflavonoid biosynthesis	Metabolism	Biosynthesis of other secondary metabolites	HMDB0304048	Phenylpropanoids and polyketides	Isoflavonoids	O-methylated isoflavonoids	-	304.118	5.45047	M+NH4	C16H14O5	0	36.4	pos
neg_6121	Tryptophylhydroxyproline	metab_13427	0.001045	0.00172	1.2467	1.2606	0.6428	-0.6376	yes	-	-	-	-	-	-	-	HMDB0029084	Organic acids and derivatives	Carboxylic acids and derivatives	Amino acids, peptides, and analogues	844640-75-1	316.131	4.163	M-H	C16H19N3O4	0	52	neg
neg_1061	Valylhistidine	metab_7826	7.86e-05	0.0001729	1.2466	1.2476	0.718	-0.4779	yes	-	-	-	-	-	-	-	HMDB0029129	Organic acids and derivatives	Carboxylic acids and derivatives	Amino acids, peptides, and analogues	13589-07-6	253.13	0.969533	M-H	C11H18N4O3	0	31.2	neg
pos_7445	L-Asparagine	metab_7100	0.002171	0.003289	1.2464	1.2358	0.7277	-0.4586	yes	C00152	Peptides	Amino acids	map01100;map04978;map01110;map00460;map01230;map00250;map04974;map00970;map05230;map01060	Metabolic pathways;Mineral absorption;Biosynthesis of secondary metabolites;Cyanoamino acid metabolism;Biosynthesis of amino acids;Alanine, aspartate and glutamate metabolism;Protein digestion and absorption;Aminoacyl-tRNA biosynthesis;Central carbon metabolism in cancer;Biosynthesis of plant secondary metabolites	Metabolism;Organismal Systems;Metabolism;Metabolism;Metabolism;Metabolism;Organismal Systems;Genetic Information Processing;Human Diseases;Metabolism	Global and overview maps;Digestive system;Global and overview maps;Metabolism of other amino acids;Global and overview maps;Amino acid metabolism;Digestive system;Translation;Cancer: overview;Chemical structure transformation maps	PW_C000110;HMDB0251512;HMDB0000168;MJDBOTE0000518	Organic acids and derivatives	Carboxylic acids and derivatives	Amino acids, peptides, and analogues	70-47-3	133.061	0.969417	M+H	C4H8N2O3	56.5	0	pos
pos_107	2-Hydroxy-2,6,6-trimethylcyclohexanone	metab_79	0.004043	0.005812	1.2458	1.2326	1.4426	0.5287	yes	-	-	-	-	-	-	-	HMDB0037023	Organic oxygen compounds	Organooxygen compounds	Carbonyl compounds	7500-42-7	330.264	5.20977	M+Na, M+ACN+Na, 2M+NH4	C9H16O2	0	42.5	pos
neg_6371	5-Hydroxy-N-formylkynurenine	metab_13701	8.43e-06	2.6e-05	1.2445	1.241	1.4537	0.5397	yes	C05648	-	-	map01100;map00380	Metabolic pathways;Tryptophan metabolism	Metabolism;Metabolism	Global and overview maps;Amino acid metabolism	PW_C002055;HMDB0004086	Organic oxygen compounds	Organooxygen compounds	Carbonyl compounds	-	251.067	3.8954	M-H	C11H12N2O5	0	51.7	neg
neg_5426	D-Pantothenoyl-L-cysteine	metab_12656	0.02221	0.02825	1.2438	1.2545	0.5754	-0.7974	yes	C04079	-	-	map00770	Pantothenate and CoA biosynthesis	Metabolism	Metabolism of cofactors and vitamins	PW_C002959;HMDB0006834	Organic acids and derivatives	Peptidomimetics	Hybrid peptides	-	303.102	5.18383	M-H2O-H	C12H22N2O6S	0	36.5	neg
pos_1855	2-Deoxy-L-ribono-1,4-lactone	metab_947	1.99e-05	4.96e-05	1.243	1.2424	1.422	0.5079	yes	-	-	-	-	-	-	-	HMDB0033958	Organoheterocyclic compounds	Lactones	Gamma butyrolactones	38996-14-4	174.076	1.22282	M+ACN+H	C5H8O4	0	38.6	pos
neg_6715	Tyrosyl-Proline	metab_14082	1.07e-08	1.61e-07	1.2416	1.2402	1.3274	0.4086	yes	-	-	-	-	-	-	-	HMDB0029113	Organic acids and derivatives	Carboxylic acids and derivatives	Amino acids, peptides, and analogues	-	277.119	3.53313	M-H	C14H18N2O4	0	65.4	neg
pos_7211	4-Acetamido-2-aminobutanoic acid	metab_6847	2.38e-05	5.77e-05	1.2413	1.2418	0.7426	-0.4293	yes	C06442	-	-	map01100;map01120;map00260	Metabolic pathways;Microbial metabolism in diverse environments;Glycine, serine and threonine metabolism	Metabolism;Metabolism;Metabolism	Global and overview maps;Global and overview maps;Amino acid metabolism	HMDB0031411	Organic acids and derivatives	Carboxylic acids and derivatives	Amino acids, peptides, and analogues	1190-46-1	384.188	2.41247	2M+ACN+Na	C6H12N2O3	0	41.4	pos
pos_6732	2-Propylglutaric acid	metab_6316	0.0002447	0.0004579	1.241	1.2308	1.5362	0.6194	yes	C16658	-	-	map00982	Drug metabolism - cytochrome P450	Metabolism	Xenobiotics biodegradation and metabolism	HMDB0060684;PW_C040548	Lipids and lipid-like molecules	Fatty Acyls	Fatty acids and conjugates	32806-62-5	157.086	3.1052	M+H-H2O	C8H14O4	0	53.2	pos
pos_5242	Tobramycin	metab_4672	8.4e-05	0.0001766	1.2396	1.2382	1.4141	0.4999	yes	C00397	-	-	map01110;map00524	Biosynthesis of secondary metabolites;Neomycin, kanamycin and gentamicin biosynthesis	Metabolism;Metabolism	Global and overview maps;Biosynthesis of other secondary metabolites	PW_C009161;HMDB0014822	Organic oxygen compounds	Organooxygen compounds	Carbohydrates and carbohydrate conjugates	32986-56-4	432.249	5.78803	M+H-2H2O	C18H37N5O9	0	56.6	pos
neg_3272	Cholyltyrosine	metab_10271	0.008833	0.01198	1.2395	1.2592	0.7118	-0.4904	yes	-	-	-	-	-	-	-	HMDB0242377	Lipids and lipid-like molecules	Steroids and steroid derivatives	Bile acids, alcohols and derivatives	-	570.343	6.1884	M-H	C33H49NO7	0	80.3	neg
pos_5642	Hymenoxon	metab_5111	8.92e-05	0.0001867	1.2392	1.2296	1.4452	0.5313	yes	C09482	-	-	-	-	-	-	HMDB0253305	Organoheterocyclic compounds	Oxanes	Not Available	57377-32-9	300.18	4.96975	M+NH4	C15H22O5	0	63.9	pos
pos_5447	Pantoyllactone glucoside	metab_4898	6.2e-08	3.83e-07	1.2392	1.2371	1.3517	0.4348	yes	-	-	-	-	-	-	-	HMDB0041269	Lipids and lipid-like molecules	Fatty Acyls	Fatty acyl glycosides	-	325.152	5.34577	M+CH3OH+H	C12H20O8	0	56.3	pos
neg_6114	Tripdiolide	metab_13419	1.73e-06	7.22e-06	1.2392	1.2349	1.361	0.4447	yes	C09202	-	-	-	-	-	-	HMDB0259259	Organoheterocyclic compounds	Oxepanes	Not Available	38647-10-8	413.102	4.17083	M+K-2H	C20H24O7	0	50.6	neg
neg_3429	Collettiside I	metab_10445	7.12e-06	2.26e-05	1.2389	1.2306	0.7376	-0.439	yes	-	-	-	-	-	-	-	LMST01080094;HMDB0029310	Lipids and lipid-like molecules	Steroids and steroid derivatives	Steroidal glycosides	14144-06-0	621.365	6.49198	M+FA-H	C33H52O8	0	33.1	neg
pos_3172	(S)-10,16-Dihydroxyhexadecanoic acid	metab_2400	0.01196	0.01575	1.2382	1.222	1.6566	0.7283	yes	C08285	-	-	map00073	Cutin, suberine and wax biosynthesis	Metabolism	Lipid metabolism	HMDB0037798	Lipids and lipid-like molecules	Fatty Acyls	Fatty acids and conjugates	69232-67-3	330.264	5.49047	M+ACN+H	C16H32O4	0	69.3	pos
neg_6355	Lysyl-aspartyl-glutamyl-leucine	metab_13683	2.24e-07	1.48e-06	1.238	1.2388	0.7037	-0.507	yes	-	-	-	-	-	-	-	HMDB0247848	Organic acids and derivatives	Carboxylic acids and derivatives	Amino acids, peptides, and analogues	-	502.252	3.90323	M-H	C21H37N5O9	0	54.6	neg
pos_7167	N-(gamma-Glutamyl)ethanolamine	metab_6798	0.001516	0.002365	1.2375	1.2375	0.7106	-0.4929	yes	-	-	-	-	-	-	-	HMDB0039222	Organic acids and derivatives	Carboxylic acids and derivatives	Amino acids, peptides, and analogues	2650-74-0	403.182	2.56425	2M+Na	C7H14N2O4	0	48	pos
pos_4709	Paricalcitol	metab_4084	3.35e-06	1.07e-05	1.2371	1.2378	1.3176	0.3979	yes	C08127	-	-	-	-	-	-	HMDB0015046;LMST04030163	Lipids and lipid-like molecules	Steroids and steroid derivatives	Vitamin D and derivatives	131918-61-1	439.32	6.32922	M+Na	C27H44O3	0	59.2	pos
neg_2295	7-methylthioheptyldesulfoglucosinolate	metab_9192	0.001814	0.002821	1.2368	1.2495	0.6363	-0.6523	yes	-	-	-	-	-	-	-	HMDB0304243	Organic oxygen compounds	Organooxygen compounds	Carbohydrates and carbohydrate conjugates	-	382.136	4.5209	M-H	C15H29NO6S2	0	40.3	neg
neg_6440	DG(5-iso PGF2VI/2:0/0:0)	metab_13778	6.66e-05	0.0001496	1.2361	1.2392	0.7036	-0.5071	yes	-	-	-	-	-	-	-	HMDB0296944	Not Available	Not Available	Not Available	-	487.252	3.82435	M+FA-H	C23H38O8	0	55.3	neg
neg_4909	3-Oxo-2-(2-entenyl)cyclopentaneoctanoic acid	metab_12082	7.11e-08	6.14e-07	1.236	1.2378	1.3837	0.4686	yes	C04780	-	-	map01100;map00592;map01110;map01070	Metabolic pathways;alpha-Linolenic acid metabolism;Biosynthesis of secondary metabolites;Biosynthesis of plant hormones	Metabolism;Metabolism;Metabolism;Metabolism	Global and overview maps;Lipid metabolism;Global and overview maps;Chemical structure transformation maps	HMDB0301805	Lipids and lipid-like molecules	Fatty Acyls	Eicosanoids	204135-86-4	339.218	5.9	M+FA-H	C18H30O3	0	45.3	neg
pos_1212	Medroxyprogesterone	metab_237	1.77e-07	8.91e-07	1.2357	1.2363	1.3181	0.3984	yes	C07119	-	-	-	-	-	-	HMDB0001939;LMST02030176;MJDBOTE0001334	Lipids and lipid-like molecules	Steroids and steroid derivatives	Pregnane steroids	520-85-4	327.231	6.29762	M+H-H2O, M+H	C22H32O3	0	51.9	pos
pos_5866	4-Hydroxyhexanoycarnitine	metab_5357	2.75e-06	8.99e-06	1.2351	1.2361	1.3822	0.4669	yes	-	-	-	-	-	-	-	HMDB0241665	Lipids and lipid-like molecules	Fatty Acyls	Fatty acid esters	-	339.191	4.4872	M+ACN+Na	C13H25NO5	0	32.7	pos
neg_6850	6-(2-Hydroxyethoxy)-6-oxohexanoic acid	metab_14231	1.12e-06	5.18e-06	1.235	1.2362	1.4563	0.5423	yes	-	-	-	-	-	-	-	HMDB0061681	Lipids and lipid-like molecules	Fatty Acyls	Fatty acids and conjugates	-	171.065	3.40662	M-H2O-H	C8H14O5	0	50.2	neg
pos_3300	Kahweol	metab_2540	1.3e-06	4.69e-06	1.2342	1.2332	1.4041	0.4897	yes	C09893	-	-	map01110;map00902	Biosynthesis of secondary metabolites;Monoterpenoid biosynthesis	Metabolism;Metabolism	Global and overview maps;Metabolism of terpenoids and polyketides	HMDB0035602	Lipids and lipid-like molecules	Prenol lipids	Monoterpenoids	6894-43-5	315.195	5.8918	M+H	C20H26O3	48.7	0	pos
neg_3296	Traumatic Acid	metab_10297	6.5e-05	0.000147	1.2342	1.2257	1.3542	0.4375	yes	C16308	-	-	map00592;map01110	alpha-Linolenic acid metabolism;Biosynthesis of secondary metabolites	Metabolism;Metabolism	Lipid metabolism;Global and overview maps	HMDB0000933;LMFA01170002	Lipids and lipid-like molecules	Fatty Acyls	Fatty acids and conjugates	6402-36-4	227.128	6.25042	M-H	C12H20O4	79.5	0	neg
pos_749	8-Hydroxycarteolol	metab_7147	6.23e-08	3.83e-07	1.2331	1.2346	1.3351	0.4169	yes	-	-	-	-	-	-	-	HMDB0060990	Organoheterocyclic compounds	Quinolines and derivatives	Quinolones and derivatives	-	309.18	5.12177	M+H, M+Na	C16H24N2O4	0	66	pos
pos_5376	Dihydrocapsiate	metab_4819	0.0001587	0.0003107	1.2326	1.2248	1.3176	0.3979	yes	C20203	-	-	-	-	-	-	HMDB0034780;HMDB0034781	Benzenoids	Phenols	Methoxyphenols	-	309.206	5.49847	M+H	C18H28O4	0	42	pos
pos_985	LysoPC(20:2(11Z,14Z)/0:0)	metab_7678	7.49e-08	4.43e-07	1.2325	1.2285	0.7933	-0.3341	yes	C04230	Lipids	Phospholipids	map00564;map05231	Glycerophospholipid metabolism;Choline metabolism in cancer	Metabolism;Human Diseases	Lipid metabolism;Cancer: overview	HMDB0010392	Lipids and lipid-like molecules	Glycerophospholipids	Glycerophosphocholines	-	548.371	7.06023	M+H, M+Na	C28H54NO7P	0	80.8	pos
neg_1228	2-Oxoarginine	metab_8010	7.87e-05	0.0001732	1.2323	1.2333	0.6382	-0.648	yes	C03771	-	-	map01100;map00330	Metabolic pathways;Arginine and proline metabolism	Metabolism;Metabolism	Global and overview maps;Amino acid metabolism	HMDB0004225;PW_C002094	Organic acids and derivatives	Keto acids and derivatives	Short-chain keto acids and derivatives	3715-10-04	154.061	2.48942	M-H2O-H	C6H11N3O3	0	39.5	neg
neg_5113	Niraxostat	metab_12310	5.81e-07	3.09e-06	1.2322	1.2305	1.476	0.5617	yes	-	-	-	-	-	-	-	HMDB0255624	Organoheterocyclic compounds	Azoles	Pyrazoles	-	344.125	5.65393	M+FA-H	C16H17N3O3	0	35	neg
pos_6822	Gly Asp Leu	metab_6416	9.46e-05	0.0001969	1.232	1.2293	0.7362	-0.4418	yes	-	-	-	-	-	-	-	-	-	-	-	-	304.15	2.98535	M+H	C12H21N3O6	47.7	0	pos
pos_154	2-ethyl-N-[4-(4-fluorophenyl)-1,3-thiazol-2-yl]hexanamide	metab_600	4.76e-07	2e-06	1.2318	1.226	1.3098	0.3894	yes	-	-	-	-	-	-	-	-	-	-	-	-	303.134	5.45047	M+H-H2O, M+H, M+H-2H2O	C17H21FN2OS	47.9	0	pos
pos_857	Petasinine	metab_7537	1.71e-08	1.46e-07	1.2308	1.2307	1.2739	0.3493	yes	-	-	-	-	-	-	-	HMDB0030516	Organoheterocyclic compounds	Pyrrolizidines	Not Available	70474-33-8	303.17	6.08332	M+NH4, M+ACN+Na	C13H21NO3	0	44.7	pos
neg_6469	20-Hydroxy-leukotriene E4	metab_13809	4.1e-05	9.9e-05	1.2307	1.2308	0.7273	-0.4593	yes	C03577	-	-	map00590	Arachidonic acid metabolism	Metabolism	Lipid metabolism	LMFA03020062;HMDB0012639;LMFA03020025	Lipids and lipid-like molecules	Fatty Acyls	Eicosanoids	111844-33-8	500.236	3.793	M+FA-H	C23H37NO6S	0	80.6	neg
neg_1741	Pyropheophorbide a	metab_8579	1.89e-06	7.7e-06	1.2305	1.2329	0.7136	-0.4869	yes	C18064	-	-	map01110;map00860	Biosynthesis of secondary metabolites;Porphyrin and chlorophyll metabolism	Metabolism;Metabolism	Global and overview maps;Metabolism of cofactors and vitamins	HMDB0256993	Not Available	Not Available	Not Available	-	515.247	3.714	M-H2O-H	C33H34N4O3	0	59.5	neg
pos_6918	Hydroxyzine	metab_6521	3.65e-06	1.15e-05	1.2304	1.23	0.7522	-0.4108	yes	C07045	-	-	-	-	-	-	PW_C009051;HMDB0014697	Benzenoids	Benzene and substituted derivatives	Diphenylmethanes	68-88-2	416.214	2.86583	M+ACN+H	C21H27ClN2O2	0	30.3	pos
pos_1211	Prednisolone	metab_236	0.0001517	0.0002992	1.2293	1.222	1.3672	0.4512	yes	C07369	-	-	-	-	-	-	PW_C009315;HMDB0014998;LMST02030179;MJDBOTE0001416	Lipids and lipid-like molecules	Steroids and steroid derivatives	Hydroxysteroids	50-24-8	378.23	6.29762	M+NH4, M+2Na-H	C21H28O5	0	30.4	pos
pos_5411	Parthenolide	metab_4859	4e-05	9.19e-05	1.2293	1.2237	1.4133	0.4991	yes	C07609	-	-	-	-	-	-	LMPR0103090002	-	-	-	20554-84-1	249.148	5.42647	M+H	C15H20O3	65.6	0	pos
neg_2226	Pimelic acid	metab_9116	1.55e-05	4.35e-05	1.2292	1.2363	0.7071	-0.5	yes	C02656	Organic acids	Carboxylic acids	map01100;map00780;map01240	Metabolic pathways;Biotin metabolism;Biosynthesis of cofactors	Metabolism;Metabolism;Metabolism	Global and overview maps;Metabolism of cofactors and vitamins;Global and overview maps	HMDB0000857;LMFA01170051	Lipids and lipid-like molecules	Fatty Acyls	Fatty acids and conjugates	111-16-0	365.145	4.40655	2M+FA-H	C7H12O4	0	50.7	neg
pos_3410	N-Docosahexaenoyl Arginine	metab_2661	1.91e-08	1.6e-07	1.2282	1.2293	1.2923	0.3699	yes	-	-	-	-	-	-	-	HMDB0242008	Not Available	Not Available	Not Available	-	449.325	6.07533	M+H-2H2O	C28H44N4O3	0	66.5	pos
pos_6436	Trp Glu Thr	metab_5991	1.01e-09	2.16e-08	1.2274	1.2297	0.7314	-0.4512	yes	-	-	-	-	-	-	-	-	-	-	-	-	435.19	3.52067	M+H	C20H26N4O7	40.9	0	pos
pos_60	LysoPG(18:2(9Z,12Z)/0:0)	metab_5506	0.0001105	0.0002253	1.2268	1.2271	0.7577	-0.4002	yes	-	-	-	-	-	-	-	HMDB0240600	Lipids and lipid-like molecules	Glycerophospholipids	Glycerophosphoglycerols	2093174-30-0	531.269	6.8064	M+H-H2O, M+H, M+Na, M+H-2H2O	C24H45O9P	0	38.8	pos
neg_1495	Sanguinarine	metab_8306	1.12e-06	5.15e-06	1.2258	1.2254	1.439	0.5251	yes	C06162	-	-	map00950	Isoquinoline alkaloid biosynthesis	Metabolism	Biosynthesis of other secondary metabolites	HMDB0029367	Alkaloids and derivatives	Benzophenanthridine alkaloids	Quaternary benzophenanthridine alkaloids	2447-54-3	377.091	3.42228	M+FA-H	C20H14NO4+	0	55.4	neg
pos_3259	Methyl 7-epi-12-hydroxyjasmonate glucoside	metab_2494	0.00525	0.007343	1.2257	1.2403	0.7127	-0.4887	yes	-	-	-	-	-	-	-	HMDB0031763	Lipids and lipid-like molecules	Fatty Acyls	Fatty acyl glycosides	142465-56-3	444.223	5.7721	M+ACN+H	C19H30O9	0	60.6	pos
neg_5498	Vanillylamine	metab_12735	1.62e-07	1.15e-06	1.2253	1.2274	1.4653	0.5511	yes	C16666	-	-	map01100;map01063;map01110;map00998	Metabolic pathways;Biosynthesis of alkaloids derived from shikimate pathway;Biosynthesis of secondary metabolites;Biosynthesis of various secondary metabolites - part 2	Metabolism;Metabolism;Metabolism;Metabolism	Global and overview maps;Chemical structure transformation maps;Global and overview maps;Biosynthesis of other secondary metabolites	HMDB0012309	Benzenoids	Phenols	Methoxyphenols	1196-92-5	351.156	5.07988	2M+FA-H	C8H11NO2	0	31	neg
pos_5321	Valnemulin	metab_4759	4.61e-06	1.41e-05	1.2251	1.225	1.2876	0.3647	yes	C12066	-	-	-	-	-	-	HMDB0259752	Lipids and lipid-like molecules	Prenol lipids	Diterpenoids	101312-92-9	609.328	5.62757	M+2Na-H	C31H52N2O5S	0	35.8	pos
pos_3363	Sulfonamidoethanol	metab_2608	0.0004034	0.0007174	1.2249	1.2113	0.7391	-0.4361	yes	-	-	-	-	-	-	-	HMDB0258596	Organic acids and derivatives	Organic sulfonic acids and derivatives	Organosulfonic acids and derivatives	-	126.022	6.0035	M+H	C2H7NO3S	0	47.2	pos
neg_2193	VAPIPROST	metab_9080	5.21e-08	4.9e-07	1.2248	1.2267	0.7055	-0.5034	yes	-	-	-	-	-	-	-	HMDB0259765	Benzenoids	Benzene and substituted derivatives	Biphenyls and derivatives	-	498.258	4.35957	M+Na-2H	C30H39NO4	0	55.1	neg
pos_11	(2S)-2-[[2-(5-methoxyindol-1-yl)acetyl]amino]-4-methylpentanoic acid	metab_112	9.82e-09	1.02e-07	1.2248	1.224	1.2495	0.3213	yes	-	-	-	-	-	-	-	-	-	-	-	-	319.165	5.8838	M+H, M+Na, 2M+H, 2M+Na, M+H-H2O	C17H22N2O4	32.2	0	pos
neg_2742	Valtrate	metab_9686	5.79e-06	1.92e-05	1.2245	1.2206	1.542	0.6248	yes	C09801	-	-	-	-	-	-	HMDB0034493	Lipids and lipid-like molecules	Prenol lipids	Monoterpenoids	18296-44-1	233.043	5.32122	M+Na-2H	C10H12O5	0	64	neg
pos_5989	Valylproline	metab_5493	1.4e-08	1.29e-07	1.2244	1.2256	0.7132	-0.4877	yes	-	-	-	-	-	-	-	HMDB0029135	Organic acids and derivatives	Carboxylic acids and derivatives	Amino acids, peptides, and analogues	20488-27-1	451.252	4.26132	2M+Na	C10H18N2O3	0	51.6	pos
neg_2169	PA(8:0/10:0)	metab_9053	8.32e-08	6.89e-07	1.2242	1.2263	0.6874	-0.5408	yes	C00416	Lipids	Phospholipids	map01100;map00564;map01110;map00561;map05212;map05200;map04975;map04024;map05231;map04072;map04912;map04070;map04666	Metabolic pathways;Glycerophospholipid metabolism;Biosynthesis of secondary metabolites;Glycerolipid metabolism;Pancreatic cancer;Pathways in cancer;Fat digestion and absorption;cAMP signaling pathway;Choline metabolism in cancer;Phospholipase D signaling pathway;GnRH signaling pathway;Phosphatidylinositol signaling system;Fc gamma R-mediated phagocytosis	Metabolism;Metabolism;Metabolism;Metabolism;Human Diseases;Human Diseases;Organismal Systems;Environmental Information Processing;Human Diseases;Environmental Information Processing;Organismal Systems;Environmental Information Processing;Organismal Systems	Global and overview maps;Lipid metabolism;Global and overview maps;Lipid metabolism;Cancer: specific types;Cancer: overview;Digestive system;Signal transduction;Cancer: overview;Signal transduction;Endocrine system;Signal transduction;Immune system	PW_C062908;HMDB0115482	Lipids and lipid-like molecules	Glycerophospholipids	Glycerophosphates	-	473.226	4.31257	M+Na-2H	C21H41O8P	0	53.2	neg
pos_4868	4-Androstenediol	metab_4259	1.93e-09	3.31e-08	1.2239	1.2249	1.262	0.3357	yes	C14210	Steroids	19-Carbon atoms	-	-	-	-	LMST02020105;HMDB0005849	Lipids and lipid-like molecules	Steroids and steroid derivatives	Androstane steroids	1156-92-9	313.216	6.17085	M+Na	C19H30O2	0	86	pos
pos_5580	CDP-DG(i-21:0/18:1(12Z)-2OH(9,10))	metab_5043	2.38e-05	5.77e-05	1.2234	1.2189	0.7285	-0.4571	yes	-	-	-	-	-	-	-	HMDB0294247	Not Available	Not Available	Not Available	-	541.81	5.08175	M+2H	C51H93N3O17P2	0	41.4	pos
neg_3189	(3S,7E,9S)-9-Hydroxy-4,7-megastigmadien-3-one 9-glucoside	metab_10179	0.00824	0.01125	1.2234	1.2397	0.6502	-0.6211	yes	-	-	-	-	-	-	-	HMDB0036822	Lipids and lipid-like molecules	Fatty Acyls	Fatty acyl glycosides	-	415.197	6.0331	M+FA-H	C19H30O7	0	31.9	neg
pos_1283	(5Z,8Z,10E,14Z,17Z)-12-Hydroxyicosa-5,8,10,14,17-pentaenoylcarnitine	metab_315	0.01437	0.01867	1.223	1.2166	1.4622	0.5482	yes	-	-	-	-	-	-	-	HMDB0241595	Lipids and lipid-like molecules	Fatty Acyls	Fatty acid esters	-	462.32	6.10727	M+H, M+NH4	C27H43NO5	0	37.8	pos
neg_2993	Doisynoestrol	metab_9962	1.18e-07	9.05e-07	1.2228	1.2181	1.3611	0.4448	yes	C15453	-	-	-	-	-	-	HMDB0252206	Lipids and lipid-like molecules	Steroids and steroid derivatives	Steroid acids	15372-34-6	319.13	5.80632	M+Na-2H	C19H22O3	0	40	neg
pos_5306	Isosakuranetin	metab_4742	7.7e-07	3.01e-06	1.222	1.2162	1.326	0.4071	yes	C05334	-	-	map00941;map01110	Flavonoid biosynthesis;Biosynthesis of secondary metabolites	Metabolism;Metabolism	Biosynthesis of other secondary metabolites;Global and overview maps	HMDB0253690;LMPK12140355;MJDBOTE0001315	Phenylpropanoids and polyketides	Flavonoids	O-methylated flavonoids	480-43-3	304.118	5.67548	M+NH4	C16H14O5	0	53	pos
pos_7114	(S)-Abscisic acid	metab_6740	0.0004647	0.0008103	1.2219	1.2259	0.718	-0.4779	yes	C06082	-	-	map01100;map01110;map00906;map01070;map01062;map04075;map01060	Metabolic pathways;Biosynthesis of secondary metabolites;Carotenoid biosynthesis;Biosynthesis of plant hormones;Biosynthesis of terpenoids and steroids;Plant hormone signal transduction;Biosynthesis of plant secondary metabolites	Metabolism;Metabolism;Metabolism;Metabolism;Metabolism;Environmental Information Processing;Metabolism	Global and overview maps;Global and overview maps;Metabolism of terpenoids and polyketides;Chemical structure transformation maps;Chemical structure transformation maps;Signal transduction;Chemical structure transformation maps	HMDB0035140	Lipids and lipid-like molecules	Prenol lipids	Sesquiterpenoids	21293-29-8	328.15	2.676	M+ACN+Na	C15H20O4	0	30.1	pos
neg_5676	PA(PGD2/8:0)	metab_12932	1.39e-07	1.02e-06	1.2212	1.224	0.7122	-0.4896	yes	-	-	-	-	-	-	-	HMDB0266614	Not Available	Not Available	Not Available	-	613.32	4.79582	M-H2O-H	C31H53O11P	0	64.6	neg
neg_2469	Glycyl-prolyl-glutamic acid	metab_9383	1.6e-05	4.45e-05	1.2205	1.2139	1.4307	0.5167	yes	-	-	-	-	-	-	-	HMDB0252832	Organic acids and derivatives	Carboxylic acids and derivatives	Amino acids, peptides, and analogues	-	282.109	4.86442	M-H2O-H	C12H19N3O6	0	31.3	neg
pos_4615	PC(16:1(9Z)/18:4(6Z,9Z,12Z,15Z))	metab_3983	0.01516	0.01961	1.2204	1.229	0.7177	-0.4786	yes	C00157	Lipids	Phospholipids	map01100;map00564;map01110;map00590;map00591;map00592;map05231;map04723	Metabolic pathways;Glycerophospholipid metabolism;Biosynthesis of secondary metabolites;Arachidonic acid metabolism;Linoleic acid metabolism;alpha-Linolenic acid metabolism;Choline metabolism in cancer;Retrograde endocannabinoid signaling	Metabolism;Metabolism;Metabolism;Metabolism;Metabolism;Metabolism;Human Diseases;Organismal Systems	Global and overview maps;Lipid metabolism;Global and overview maps;Lipid metabolism;Lipid metabolism;Lipid metabolism;Cancer: overview;Nervous system	LMGP01010692;PW_C004058;HMDB0008009	Lipids and lipid-like molecules	Glycerophospholipids	Glycerophosphocholines	-	752.516	6.46443	M+H	C42H74NO8P	0	47.1	pos
pos_3405	(7b,10a)-3-Hydroxy-1,3,5-cadinatrien-9-one	metab_2655	5.23e-05	0.0001159	1.2198	1.2128	1.3334	0.4151	yes	-	-	-	-	-	-	-	HMDB0040981	Lipids and lipid-like molecules	Prenol lipids	Sesquiterpenoids	155662-80-9	265.18	6.07533	M+CH3OH+H	C15H20O2	0	44.1	pos
pos_2013	Serylvalylglycylglutamic acid	metab_1123	0.0001099	0.0002244	1.2195	1.2215	0.7335	-0.447	yes	-	-	-	-	-	-	-	HMDB0302163	Organic acids and derivatives	Carboxylic acids and derivatives	Amino acids, peptides, and analogues	-	373.172	2.56425	M+H-H2O	C15H26N4O8	0	43.1	pos
pos_6840	Ritalinic Acid	metab_6436	0.0009045	0.001479	1.2185	1.23	1.4397	0.5258	yes	-	-	-	-	-	-	-	HMDB0042008	Organic nitrogen compounds	Organonitrogen compounds	Amines	19395-41-6	237.16	2.96135	M+NH4	C13H17NO2	91.9	0	pos
pos_7278	Trigonelline	metab_6916	8.78e-07	3.36e-06	1.2182	1.2131	1.3101	0.3897	yes	C01004	-	-	map00760	Nicotinate and nicotinamide metabolism	Metabolism	Metabolism of cofactors and vitamins	HMDB0000875	Alkaloids and derivatives	Not Available	Not Available	535-83-1	138.055	1.7974	M+H	C7H7NO2	91.9	0	pos
pos_2765	Dihydroergotamine	metab_1949	0.0001459	0.000289	1.2175	1.2152	0.7125	-0.4891	yes	C07798	-	-	-	-	-	-	HMDB0251307;HMDB0014465	Alkaloids and derivatives	Ergoline and derivatives	Lysergic acids and derivatives	6190-39-2;511-12-6	601.319	4.286	M+NH4	C33H37N5O5	0	54.6	pos
pos_7450	5-Hydroxypentanoic acid	metab_7106	8.28e-09	9.04e-08	1.2165	1.2186	1.3112	0.3909	yes	C02804	-	-	-	-	-	-	HMDB0061927	Lipids and lipid-like molecules	Fatty Acyls	Fatty acids and conjugates	13392-69-3	101.06	0.961483	M+H-H2O	C5H10O3	0	49.5	pos
pos_5637	11-HpODE	metab_5105	0.01657	0.02123	1.2162	1.1994	1.5381	0.6212	yes	C07338	-	-	map00591	Linoleic acid metabolism	Metabolism	Lipid metabolism	LMFA02000115;HMDB0062281	Lipids and lipid-like molecules	Fatty Acyls	Lineolic acids and derivatives	-	330.264	4.97775	M+NH4	C18H32O4	0	54.6	pos
pos_6328	N-Eicosapentaenoyl Proline	metab_5871	2.86e-07	1.31e-06	1.2156	1.2156	0.7436	-0.4273	yes	-	-	-	-	-	-	-	HMDB0242078	Not Available	Not Available	Not Available	-	444.245	3.68145	M+2Na-H	C25H37NO3	0	52.1	pos
pos_5207	P-Octopamine	metab_4633	0.0003173	0.0005793	1.2154	1.2201	1.4434	0.5294	yes	C04227	-	-	map04080	Neuroactive ligand-receptor interaction	Environmental Information Processing	Signaling molecules and interaction	HMDB0004825	Benzenoids	Phenols	1-hydroxy-2-unsubstituted benzenoids	104-14-3	307.165	5.85188	2M+H	C8H11NO2	0	42.3	pos
neg_7397	Glutaminylalanine	metab_14833	3.08e-06	1.15e-05	1.2149	1.2178	0.7437	-0.4271	yes	-	-	-	-	-	-	-	HMDB0028790	Organic acids and derivatives	Carboxylic acids and derivatives	Amino acids, peptides, and analogues	16874-70-7	216.099	0.9539	M-H	C8H15N3O4	0	63.7	neg
pos_5960	Isodesmosine	metab_5462	1.25e-07	6.72e-07	1.2148	1.2139	0.7263	-0.4614	yes	-	-	-	-	-	-	-	HMDB0000739	Organic acids and derivatives	Carboxylic acids and derivatives	Tetracarboxylic acids and derivatives	991-01-5	590.303	4.31002	M+ACN+Na	C24H40N5O8+	0	52.3	pos
neg_496	DG(i-18:0/0:0/LTE4)	metab_12138	2.58e-05	6.7e-05	1.2147	1.2156	0.7742	-0.3691	yes	-	-	-	-	-	-	-	HMDB0299626	Not Available	Not Available	Not Available	-	760.519	7.28845	M-H2O-H, M-H	C44H77NO8S	0	37.7	neg
neg_1988	Calystegin A3	metab_8852	8.16e-06	2.53e-05	1.2143	1.2189	0.7289	-0.4562	yes	C10850	-	-	map00960	Tropane, piperidine and pyridine alkaloid biosynthesis	Metabolism	Biosynthesis of other secondary metabolites	HMDB0038593	Alkaloids and derivatives	Tropane alkaloids	Not Available	131580-36-4	363.177	4.05267	2M+FA-H	C7H13NO3	0	58.4	neg
pos_1949	5-Methylcytosine	metab_1050	1.77e-05	4.49e-05	1.2142	1.2192	0.7015	-0.5115	yes	C02376	-	-	map00240;map01100	Pyrimidine metabolism;Metabolic pathways	Metabolism;Metabolism	Nucleotide metabolism;Global and overview maps	HMDB0002894;MJDBOTE0000559	Organoheterocyclic compounds	Diazines	Pyrimidines and pyrimidine derivatives	554-01-8	126.066	1.88452	M+H	C5H7N3O	41	0	pos
neg_2359	Terbogrel	metab_9263	0.01008	0.01354	1.2142	1.2206	0.6352	-0.6548	yes	-	-	-	-	-	-	-	HMDB0258827	Not Available	Not Available	Not Available	-	440.189	4.63315	M+Cl	C23H27N5O2	0	37.7	neg
neg_3214	Leucylhydroxyproline	metab_10207	1.18e-05	3.44e-05	1.2135	1.2157	1.3323	0.4139	yes	-	-	-	-	-	-	-	HMDB0028930	Organic acids and derivatives	Carboxylic acids and derivatives	Amino acids, peptides, and analogues	63912-01-6	547.294	6.07168	2M+Hac-H	C11H20N2O4	0	40.4	neg
neg_4656	Sulfolithocholylglycine	metab_15390	0.006507	0.009058	1.2134	1.2154	0.6849	-0.5461	yes	C11301	-	-	-	-	-	-	HMDB0000698;HMDB0062801;HMDB0002639	Lipids and lipid-like molecules	Steroids and steroid derivatives	Bile acids, alcohols and derivatives	474-74-8;15324-64-8	548.245	6.14142	M+Cl	C26H43NO7S	0	74.2	neg
pos_36	Xemilofiban	metab_2864	0.000532	0.0009127	1.2129	1.2014	1.4505	0.5365	yes	-	-	-	-	-	-	-	HMDB0259927	Organic acids and derivatives	Carboxylic acids and derivatives	Amino acids, peptides, and analogues	-	381.152	5.796	M+NH4, M+Na, M+H-2H2O, M+H	C18H22N4O4	0	32.1	pos
pos_5768	Cichorioside N	metab_5248	0.000156	0.0003063	1.2121	1.2152	0.7002	-0.5142	yes	-	-	-	-	-	-	-	HMDB0302058	Lipids and lipid-like molecules	Prenol lipids	Terpene glycosides	-	459.26	4.69637	M+CH3OH+H	C22H34O8	0	51.4	pos
pos_1389	Armillarivin	metab_432	0.0001262	0.0002531	1.212	1.2252	1.4811	0.5667	yes	-	-	-	-	-	-	-	HMDB0038917	Lipids and lipid-like molecules	Prenol lipids	Sesquiterpenoids	135247-97-1	448.207	5.29777	M+ACN+Na, 2M+H	C23H28O5	0	33.4	pos
pos_7280	Phe Lys	metab_6919	1.28e-09	2.52e-08	1.2119	1.2141	0.7255	-0.4631	yes	-	-	-	-	-	-	-	-	-	-	-	-	294.181	1.78957	M+H	C15H23N3O3	68.9	0	pos
pos_2819	Etimicin	metab_2008	1.4e-08	1.29e-07	1.2113	1.2125	0.7401	-0.4343	yes	-	-	-	-	-	-	-	HMDB0252101	Organic oxygen compounds	Organooxygen compounds	Carbohydrates and carbohydrate conjugates	-	500.308	4.41453	M+Na	C21H43N5O7	0	77	pos
neg_1885	Fructose citrate	metab_8738	4.72e-05	0.0001115	1.2112	1.213	1.4063	0.4919	yes	-	-	-	-	-	-	-	HMDB0252489	Organic acids and derivatives	Carboxylic acids and derivatives	Tricarboxylic acids and derivatives	-	387.019	3.90323	M+Na-2H	C12H14O13	0	43	neg
pos_3038	Rutacridone	metab_2251	5.15e-06	1.55e-05	1.2109	1.2028	1.3785	0.4631	yes	C10738	-	-	map01058;map01110;map01063	Acridone alkaloid biosynthesis;Biosynthesis of secondary metabolites;Biosynthesis of alkaloids derived from shikimate pathway	Metabolism;Metabolism;Metabolism	Biosynthesis of other secondary metabolites;Global and overview maps;Chemical structure transformation maps	HMDB0033852	Organoheterocyclic compounds	Quinolines and derivatives	Benzoquinolines	17948-33-3	325.154	5.08975	M+NH4	C19H17NO3	0	36.2	pos
neg_5240	Ancistrocladine	metab_12451	4.06e-07	2.36e-06	1.2102	1.2143	0.6991	-0.5164	yes	C09335	-	-	-	-	-	-	HMDB0248388	Organoheterocyclic compounds	Isoquinolines and derivatives	Naphthylisoquinolines	32221-59-3	406.198	5.45648	M-H	C25H29NO4	0	39.1	neg
pos_13	5-Hydroxy-6-methoxy-1h-indole-2-carboxylic acid	metab_333	2.72e-09	4.19e-08	1.2101	1.2073	1.2406	0.311	yes	-	-	-	-	-	-	-	HMDB0246803	Organoheterocyclic compounds	Indoles and derivatives	Indolecarboxylic acids and derivatives	-	208.06	3.75345	M+H, M+K, M+Na, 2M+K, M+H-H2O	C10H9NO4	0	35.1	pos
neg_3459	Brassinolide	metab_15367	2.38e-07	1.55e-06	1.2096	1.2065	1.2878	0.3649	yes	C08814	Steroids	28-Carbon atoms	map01100;map01110;map00905;map01070;map01062;map04075;map01060	Metabolic pathways;Biosynthesis of secondary metabolites;Brassinosteroid biosynthesis;Biosynthesis of plant hormones;Biosynthesis of terpenoids and steroids;Plant hormone signal transduction;Biosynthesis of plant secondary metabolites	Metabolism;Metabolism;Metabolism;Metabolism;Metabolism;Environmental Information Processing;Metabolism	Global and overview maps;Global and overview maps;Metabolism of terpenoids and polyketides;Chemical structure transformation maps;Chemical structure transformation maps;Signal transduction;Chemical structure transformation maps	HMDB0034081;HMDB0041130;LMST01140001	Lipids and lipid-like molecules	Steroids and steroid derivatives	Steroid lactones	72962-43-7;78821-43-9	461.327	6.53893	M-H2O-H	C28H48O6	0	83.2	neg
pos_3070	3-(5'-methylthio)pentylmalate	metab_2287	8.27e-06	2.31e-05	1.2095	1.2073	1.3561	0.4395	yes	C17223	-	-	map01210;map00966	2-Oxocarboxylic acid metabolism;Glucosinolate biosynthesis	Metabolism;Metabolism	Global and overview maps;Biosynthesis of other secondary metabolites	HMDB0304110	Organic acids and derivatives	Hydroxy acids and derivatives	Medium-chain hydroxy acids and derivatives	-	266.107	5.18575	M+NH4	C10H16O5S-2	0	50.3	pos
pos_4077	Curcumenol	metab_3389	0.0001493	0.0002948	1.2094	1.1974	0.7757	-0.3665	yes	C16942	-	-	-	-	-	-	HMDB0033960;MJDBOTE0000956	Lipids and lipid-like molecules	Prenol lipids	Sesquiterpenoids	19431-84-6	510.356	7.73553	2M+ACN+H	C15H22O2	0	49.9	pos
neg_5810	Harmalan	metab_13082	2.87e-06	1.09e-05	1.2091	1.2071	1.4782	0.5639	yes	-	-	-	-	-	-	-	HMDB0029834	Alkaloids and derivatives	Harmala alkaloids	Not Available	525-41-7	183.092	4.59687	M-H	C12H12N2	0	65.8	neg
neg_1760	3-Hydroxymugineic acid	metab_8600	0.0007605	0.001298	1.2083	1.1958	1.4254	0.5114	yes	-	-	-	-	-	-	-	HMDB0033927	Organic acids and derivatives	Carboxylic acids and derivatives	Amino acids, peptides, and analogues	74235-23-7	373.063	3.74533	M+K-2H	C12H20N2O9	0	30.5	neg
neg_6940	Thesinine 4'-O-glucoside	metab_14331	6.99e-06	2.23e-05	1.2082	1.2128	0.7181	-0.4777	yes	-	-	-	-	-	-	-	HMDB0039900	Phenylpropanoids and polyketides	Flavonoids	Flavonoid glycosides	-	494.199	3.32765	M+FA-H	C23H31NO8	0	75.4	neg
pos_4456	1-Carboxycyclohexaneacetic Acid	metab_3807	1.48e-08	1.33e-07	1.2079	1.2091	1.2972	0.3754	yes	-	-	-	-	-	-	-	-	-	-	-	-	151.075	6.71877	M+H-2H2O	C9H14O4	73.3	0	pos
pos_187	Val Asp Thr	metab_963	0.001123	0.001798	1.2079	1.216	0.762	-0.3922	yes	-	-	-	-	-	-	-	-	-	-	-	-	334.161	2.5483	M+H-2H2O, M+ACN+H, M+H	C13H23N3O7	65.6	0	pos
neg_1680	Mopidamol	metab_8511	1.23e-05	3.55e-05	1.207	1.2063	0.7228	-0.4683	yes	-	-	-	-	-	-	-	HMDB0254878	Organic nitrogen compounds	Organonitrogen compounds	Amines	-	456.21	3.6428	M+Cl	C19H31N7O4	0	50.6	neg
pos_866	DIOSGENIN	metab_7546	7.03e-09	8.11e-08	1.206	1.2079	1.2552	0.3279	yes	C08898	Steroids	27-Carbon atoms	map01060	Biosynthesis of plant secondary metabolites	Metabolism	Chemical structure transformation maps	LMST01080037;HMDB0242671	Lipids and lipid-like molecules	Prenol lipids	Triterpenoids	512-04-9	415.32	6.12315	M+H-H2O, M+H	C27H42O3	60.6	0	pos
neg_3349	13(S)-HpOTrE	metab_10356	1.91e-05	5.18e-05	1.205	1.1989	1.394	0.4792	yes	C04785	-	-	map01100;map00592;map01110	Metabolic pathways;alpha-Linolenic acid metabolism;Biosynthesis of secondary metabolites	Metabolism;Metabolism;Metabolism	Global and overview maps;Lipid metabolism;Global and overview maps	HMDB0301803	Lipids and lipid-like molecules	Fatty Acyls	Lineolic acids and derivatives	67597-26-6	309.207	6.35145	M-H	C18H30O4	42.4	0	neg
neg_2243	6-allyl-8b-Carboxy-ergoline	metab_9135	3.85e-05	9.39e-05	1.2045	1.1957	1.3584	0.4419	yes	-	-	-	-	-	-	-	HMDB0060782	Alkaloids and derivatives	Ergoline and derivatives	Lysergic acids and derivatives	-	333.101	4.4379	M+K-2H	C18H20N2O2	0	30.8	neg
neg_7282	N2-gamma-Glutamylglutamine	metab_14708	0.000494	0.0008846	1.2035	1.2087	0.6928	-0.5295	yes	C05283	-	-	-	-	-	-	HMDB0011738	Organic acids and derivatives	Carboxylic acids and derivatives	Amino acids, peptides, and analogues	10148-81-9	256.094	1.44778	M-H2O-H	C10H17N3O6	0	66.7	neg
pos_5148	Monoethylhexyl phthalic acid	metab_4568	0.002868	0.00424	1.2034	1.1882	1.5013	0.5862	yes	C03343	-	-	-	-	-	-	HMDB0013248	Benzenoids	Benzene and substituted derivatives	Benzoic acids and derivatives	4376-20-9	296.185	5.93182	M+NH4	C16H22O4	0	54.1	pos
neg_5369	Prolylphenylalanine	metab_12592	0.0003031	0.0005686	1.2033	1.2089	0.6067	-0.7209	yes	-	-	-	-	-	-	-	HMDB0011179	Organic acids and derivatives	Carboxylic acids and derivatives	Amino acids, peptides, and analogues	13589-02-1	307.13	5.27165	M+FA-H	C14H18N2O3	0	48.2	neg
neg_3476	Gymnodimine	metab_10496	9.5e-08	7.61e-07	1.2029	1.2036	1.2634	0.3373	yes	C20025	-	-	-	-	-	-	HMDB0041430	Organoheterocyclic compounds	Pyridines and derivatives	Hydropyridines	173792-58-0	552.336	6.57805	M+FA-H	C32H45NO4	0	64.2	neg
neg_6430	8-Deoxylactucin	metab_13767	0.008789	0.01193	1.2021	1.1905	0.6278	-0.6717	yes	C09392	-	-	-	-	-	-	HMDB0301858	Organoheterocyclic compounds	Lactones	Gamma butyrolactones	65725-10-2	281.081	3.84	M+Na-2H	C15H16O4	0	36.9	neg
pos_6592	Hydroxyprolyl-Proline	metab_6162	2.56e-07	1.19e-06	1.2013	1.2024	0.7348	-0.4446	yes	-	-	-	-	-	-	-	HMDB0028871	Organic acids and derivatives	Carboxylic acids and derivatives	Amino acids, peptides, and analogues	-	474.256	3.29703	2M+NH4	C10H16N2O4	0	47.5	pos
neg_3754	LysoPE(0:0/18:3(9Z,12Z,15Z))	metab_10803	5.87e-08	5.34e-07	1.2007	1.2025	0.7304	-0.4533	yes	-	-	-	-	-	-	-	HMDB0011479	Lipids and lipid-like molecules	Glycerophospholipids	Glycerophosphoethanolamines	-	520.268	7.56232	M+FA-H	C23H42NO7P	0	59.9	neg
pos_5234	Furathiocarb	metab_4663	0.0004497	0.0007869	1.1995	1.1896	1.3886	0.4736	yes	C18650	-	-	-	-	-	-	HMDB0252533	Organoheterocyclic compounds	Coumarans	Not Available	65907-30-4	424.187	5.80398	M+ACN+H	C18H26N2O5S	0	51.7	pos
neg_5127	(4S,8R)-8,9-Dihydroxy-p-menth-1(6)-en-2-one	metab_12325	0.0007352	0.001257	1.1991	1.1879	1.4376	0.5236	yes	-	-	-	-	-	-	-	HMDB0039052	Lipids and lipid-like molecules	Prenol lipids	Monoterpenoids	402593-42-4	229.108	5.63138	M+FA-H	C10H16O3	0	72.4	neg
pos_5572	Thienamycin	metab_5034	0.0004756	0.0008268	1.198	1.1951	0.6975	-0.5198	yes	C06664	Antibiotics	beta-Lactams	map01110;map00332	Biosynthesis of secondary metabolites;Carbapenem biosynthesis	Metabolism;Metabolism	Global and overview maps;Biosynthesis of other secondary metabolites	HMDB0258982	Organoheterocyclic compounds	Lactams	Beta lactams	59995-64-1	305.116	5.10575	M+CH3OH+H	C11H16N2O4S	0	43.1	pos
neg_4357	Jervine	metab_11471	9.26e-06	2.81e-05	1.1977	1.1998	0.7448	-0.4251	yes	C10811	-	-	map01066	Biosynthesis of alkaloids derived from terpenoid and polyketide	Metabolism	Chemical structure transformation maps	HMDB0253731;MJDBOTE0000999	Lipids and lipid-like molecules	Steroids and steroid derivatives	Steroidal alkaloids	469-59-0	424.286	6.54675	M-H	C27H39NO3	0	32.5	neg
pos_5534	(+)-Abscisic Acid	metab_4992	0.0003678	0.000662	1.1967	1.1884	1.4224	0.5084	yes	C06082	-	-	map01100;map01110;map00906;map01070;map01062;map04075;map01060	Metabolic pathways;Biosynthesis of secondary metabolites;Carotenoid biosynthesis;Biosynthesis of plant hormones;Biosynthesis of terpenoids and steroids;Plant hormone signal transduction;Biosynthesis of plant secondary metabolites	Metabolism;Metabolism;Metabolism;Metabolism;Metabolism;Environmental Information Processing;Metabolism	Global and overview maps;Global and overview maps;Metabolism of terpenoids and polyketides;Chemical structure transformation maps;Chemical structure transformation maps;Signal transduction;Chemical structure transformation maps	HMDB0035140	Lipids and lipid-like molecules	Prenol lipids	Sesquiterpenoids	21293-29-8	265.143	5.18575	M+H	C15H20O4	62	0	pos
pos_5384	Petasitenine	metab_4828	4.98e-06	1.51e-05	1.1964	1.1969	1.3041	0.3831	yes	C10359	-	-	-	-	-	-	HMDB0030328	Organoheterocyclic compounds	Azaspirodecane derivatives	Not Available	60102-37-6	445.196	5.47447	M+ACN+Na	C19H27NO7	0	80.8	pos
neg_2805	Tranexamic Acid	metab_9756	0.002969	0.004425	1.1963	1.2007	0.7104	-0.4933	yes	C12535	-	-	-	-	-	-	PW_C008836;HMDB0014447;MJDBOTE0000780	Organic acids and derivatives	Carboxylic acids and derivatives	Amino acids, peptides, and analogues	1197-18-8	202.108	5.42703	M+FA-H	C8H15NO2	0	52.8	neg
pos_6483	Gamma-Glutamyl-5-hydroxytryptophan	metab_6043	0.0003373	0.0006117	1.1957	1.1924	0.7257	-0.4625	yes	-	-	-	-	-	-	-	HMDB0252616	Organic acids and derivatives	Carboxylic acids and derivatives	Amino acids, peptides, and analogues	-	391.161	3.45608	M+ACN+H	C16H19N3O6	0	39.7	pos
neg_7133	Lysylhydroxyproline	metab_14545	9.92e-05	0.0002113	1.1956	1.1958	0.7723	-0.3728	yes	-	-	-	-	-	-	-	HMDB0028952	Organic acids and derivatives	Carboxylic acids and derivatives	Amino acids, peptides, and analogues	870233-57-1	304.151	3.0444	M+FA-H	C11H21N3O4	0	76.4	neg
pos_750	4-(2-Aminoethyl)cyclohexa-3,5-diene-1,2-diol	metab_7159	7.26e-10	1.76e-08	1.1937	1.194	1.3181	0.3984	yes	-	-	-	-	-	-	-	HMDB0257596	Organic oxygen compounds	Organooxygen compounds	Alcohols and polyols	-	352.223	5.15375	M+H-H2O, 2M+ACN+H	C8H13NO2	0	34.7	pos
neg_168	Hypoxanthine	metab_8510	4.68e-09	8.97e-08	1.1935	1.1903	1.2388	0.3089	yes	C00262	-	-	map01100;map00230	Metabolic pathways;Purine metabolism	Metabolism;Metabolism	Global and overview maps;Nucleotide metabolism	HMDB0000157;PW_C000102	Organoheterocyclic compounds	Imidazopyrimidines	Purines and purine derivatives	68-94-0	135.03	1.5968	M-H, M+Cl	C5H4N4O	81.2	0	neg
pos_6523	Dimethylarginine	metab_6086	3.49e-05	8.14e-05	1.1934	1.1979	0.7458	-0.4232	yes	-	-	-	-	-	-	-	HMDB0251395	Organic acids and derivatives	Carboxylic acids and derivatives	Amino acids, peptides, and analogues	-	443.25	3.39213	2M+K	C8H18N4O2	0	30.6	pos
neg_2626	Diethylaminoethyl-Sephacel	metab_9558	0.003555	0.005213	1.1926	1.2031	0.6645	-0.5896	yes	-	-	-	-	-	-	-	HMDB0251243	Organic oxygen compounds	Organooxygen compounds	Carbohydrates and carbohydrate conjugates	-	415.22	5.13875	M+K-2H	C18H38N2O6	0	46	neg
neg_6069	Schiff base	metab_13368	5.3e-08	4.95e-07	1.1925	1.1944	0.712	-0.49	yes	-	-	-	-	-	-	-	HMDB0258164	Benzenoids	Benzene and substituted derivatives	Aniline and substituted anilines	-	419.161	4.22567	M+Cl	C19H24N6O3	0	53.1	neg
pos_4625	2-Pentyl-3-phenyl-2-propenal	metab_3994	7.05e-08	4.23e-07	1.1922	1.1895	1.3105	0.3901	yes	C12288	-	-	-	-	-	-	HMDB0031313	Phenylpropanoids and polyketides	Cinnamaldehydes	Not Available	122-40-7	203.143	6.45648	M+H	C14H18O	0	53.2	pos
pos_3307	Nitrolinoleic acid	metab_2547	0.02708	0.03355	1.1919	1.1753	1.5761	0.6563	yes	C13800	-	-	-	-	-	-	HMDB0255653;HMDB0005049	Lipids and lipid-like molecules	Fatty Acyls	Lineolic acids and derivatives	774603-04-2	367.259	5.8998	M+ACN+H	C18H31NO4	0	39.9	pos
pos_3552	Vomifoliol	metab_2814	7.23e-09	8.31e-08	1.1919	1.1923	1.2644	0.3384	yes	C04166	-	-	-	-	-	-	HMDB0303570	Lipids and lipid-like molecules	Prenol lipids	Sesquiterpenoids	-	189.127	6.45648	M+H-2H2O	C13H20O3	0	79	pos
pos_6813	Shikimic acid	metab_6406	4.3e-05	9.75e-05	1.1918	1.1902	1.4025	0.488	yes	C00493	-	-	map01100;map01110;map01240;map01063;map01230;map00400;map01070;map01061;map01060	Metabolic pathways;Biosynthesis of secondary metabolites;Biosynthesis of cofactors;Biosynthesis of alkaloids derived from shikimate pathway;Biosynthesis of amino acids;Phenylalanine, tyrosine and tryptophan biosynthesis;Biosynthesis of plant hormones;Biosynthesis of phenylpropanoids;Biosynthesis of plant secondary metabolites	Metabolism;Metabolism;Metabolism;Metabolism;Metabolism;Metabolism;Metabolism;Metabolism;Metabolism	Global and overview maps;Global and overview maps;Global and overview maps;Chemical structure transformation maps;Global and overview maps;Amino acid metabolism;Chemical structure transformation maps;Chemical structure transformation maps;Chemical structure transformation maps	HMDB0003070	Organic oxygen compounds	Organooxygen compounds	Alcohols and polyols	138-59-0	216.087	3.00133	M+ACN+H	C7H10O5	0	43.8	pos
neg_3324	Artabsin	metab_10329	1.64e-07	1.16e-06	1.1917	1.1925	1.2639	0.3379	yes	C09301	-	-	-	-	-	-	HMDB0036641	Organoheterocyclic compounds	Lactones	Gamma butyrolactones	24399-20-0	541.284	6.29697	2M+FA-H	C15H20O3	0	31.3	neg
pos_7174	Ile Asn Ser	metab_6806	6.34e-05	0.0001378	1.1909	1.1942	0.7729	-0.3717	yes	-	-	-	-	-	-	-	-	-	-	-	-	333.177	2.5483	M+H	C13H24N4O6	57.7	0	pos
pos_5282	Lyciumoside VIII	metab_4716	0.0003252	0.0005925	1.1909	1.1966	1.3464	0.4291	yes	-	-	-	-	-	-	-	HMDB0033210	Lipids and lipid-like molecules	Prenol lipids	Terpene glycosides	212773-47-2	611.344	5.71548	M+H-2H2O	C32H54O13	0	50.7	pos
pos_4316	4-alpha-Methyl-5-alpha-cholest-7-en-3-beta-ol	metab_3653	8.65e-07	3.32e-06	1.1902	1.1891	1.333	0.4147	yes	C08825	-	-	-	-	-	-	HMDB0246507;HMDB0011605	Lipids and lipid-like molecules	Steroids and steroid derivatives	Cholestane steroids	481-25-4	423.362	6.98103	M+Na	C28H48O	0	65.9	pos
neg_3063	Buntanine	metab_10041	0.003905	0.005666	1.1894	1.1906	0.7082	-0.4978	yes	C10653	-	-	-	-	-	-	HMDB0038590	Organoheterocyclic compounds	Quinolines and derivatives	Benzoquinolines	119116-85-7	400.143	5.89217	M+FA-H	C20H21NO5	0	33.3	neg
pos_2743	Dynorphin B (6-9)	metab_1925	6.11e-09	7.28e-08	1.1886	1.1904	0.7759	-0.366	yes	-	-	-	-	-	-	-	HMDB0012937	Organic acids and derivatives	Carboxylic acids and derivatives	Amino acids, peptides, and analogues	-	619.349	4.21332	2M+3H2O+2H	C26H43N11O6	0	61.7	pos
pos_3099	Neohesperidoside	metab_2318	1.14e-06	4.15e-06	1.1885	1.1837	1.3106	0.3902	yes	C08244	-	-	-	-	-	-	HMDB0302540	Organic oxygen compounds	Organooxygen compounds	Carbohydrates and carbohydrate conjugates	-	359.158	5.28178	M+CH3OH+H	C12H22O10	0	40.9	pos
pos_5266	Tyrosyl-Leucine	metab_4698	2.17e-06	7.28e-06	1.188	1.1921	1.3331	0.4148	yes	-	-	-	-	-	-	-	HMDB0029109	Organic acids and derivatives	Carboxylic acids and derivatives	Amino acids, peptides, and analogues	-	317.149	5.75548	M+Na	C15H22N2O4	0	63.8	pos
pos_5636	Ile Val Leu Glu	metab_5104	0.00213	0.003234	1.1879	1.184	0.6908	-0.5337	yes	-	-	-	-	-	-	-	-	-	-	-	-	473.297	4.97775	M+H	C22H40N4O7	52.2	0	pos
neg_2306	Alpha-Carboxy-delta-nonalactone	metab_9205	0.001065	0.001749	1.1878	1.1743	1.5919	0.6707	yes	-	-	-	-	-	-	-	HMDB0030990	Organoheterocyclic compounds	Lactones	Delta valerolactones	-	181.086	4.54393	M-H2O-H	C10H16O4	0	37	neg
neg_5298	Caffeyl Alcohol	metab_12513	0.0004396	0.0007932	1.1878	1.2047	1.5939	0.6725	yes	C12206	-	-	map01110;map00940	Biosynthesis of secondary metabolites;Phenylpropanoid biosynthesis	Metabolism;Metabolism	Global and overview maps;Biosynthesis of other secondary metabolites	-	-	-	-	-	211.061	5.36485	M+FA-H	C9H10O3	51	0	neg
pos_377	Ophthalmic acid	metab_3049	0.0009022	0.001476	1.1872	1.1877	0.7454	-0.4239	yes	-	-	-	-	-	-	-	HMDB0005765	Organic acids and derivatives	Carboxylic acids and derivatives	Amino acids, peptides, and analogues	495-27-2	331.161	1.7974	M+H-2H2O, M+ACN+H	C11H19N3O6	0	39	pos
neg_283	Golotimod	metab_9783	2.21e-09	5.49e-08	1.187	1.1869	0.7736	-0.3703	yes	-	-	-	-	-	-	-	HMDB0252908	Organic acids and derivatives	Carboxylic acids and derivatives	Amino acids, peptides, and analogues	-	332.125	4.65618	M-H, M+Na-2H	C16H19N3O5	0	79.3	neg
pos_4080	Eriojaposide B	metab_3393	0.02117	0.02672	1.1867	1.1694	0.7257	-0.4626	yes	C17889	-	-	-	-	-	-	HMDB0038029	Lipids and lipid-like molecules	Fatty Acyls	Fatty acyl glycosides	351412-97-0	534.296	7.72757	M+NH4	C25H40O11	0	64.4	pos
pos_6779	Quinoline-4,8-diol	metab_6367	4.28e-05	9.71e-05	1.1865	1.1831	1.4105	0.4962	yes	C05637	-	-	map00380	Tryptophan metabolism	Metabolism	Amino acid metabolism	HMDB0060289	Organoheterocyclic compounds	Quinolines and derivatives	Quinolones and derivatives	-	162.055	3.04903	M+H	C9H7NO2	0	62.4	pos
neg_4163	Citreoviridin	metab_11257	0.0003478	0.0006418	1.1857	1.1749	1.3777	0.4623	yes	C16766	-	-	-	-	-	-	HMDB0250305	Organoheterocyclic compounds	Pyrans	Pyranones and derivatives	25425-12-1	383.189	6.98418	M-H2O-H	C23H30O6	0	54.1	neg
neg_3607	Withaperuvin E	metab_10642	3.29e-07	2e-06	1.1849	1.1859	0.7677	-0.3814	yes	-	-	-	-	-	-	-	HMDB0030127	Lipids and lipid-like molecules	Prenol lipids	Terpene lactones	-	537.192	6.89828	M+K-2H	C28H36O8	0	34.2	neg
pos_5542	N-Arachidonoylglycine	metab_5001	2.28e-08	1.82e-07	1.1846	1.1841	1.34	0.4222	yes	-	-	-	-	-	-	-	LMFA08020003;HMDB0005096	Organic acids and derivatives	Carboxylic acids and derivatives	Amino acids, peptides, and analogues	179113-91-8	425.276	5.16177	M+ACN+Na	C22H35NO3	0	40	pos
pos_2659	Ala-Cys-Gly	metab_1832	6.4e-05	0.0001391	1.1837	1.1819	1.3987	0.4841	yes	-	-	-	-	-	-	-	HMDB0248093	Organic acids and derivatives	Carboxylic acids and derivatives	Amino acids, peptides, and analogues	-	294.047	3.99532	M+2Na-H	C8H15N3O4S	0	81.6	pos
pos_6665	3-Deazaneplanocin	metab_6242	5.13e-06	1.54e-05	1.1837	1.1769	1.3229	0.4037	yes	-	-	-	-	-	-	-	HMDB0245851	Organoheterocyclic compounds	Imidazopyridines	Imidazo-[4,5-c]pyridines	-	280.14	3.19342	M+NH4	C12H14N4O3	0	41.6	pos
pos_5919	Tazemetostat	metab_5416	0.00212	0.003219	1.1834	1.1804	0.7407	-0.4331	yes	-	-	-	-	-	-	-	HMDB0304867	Benzenoids	Benzene and substituted derivatives	Biphenyls and derivatives	-	605.366	4.39053	M+CH3OH+H	C34H44N4O4	0	30.3	pos
neg_3432	24-Epibrassinolide	metab_10449	8.91e-07	4.29e-06	1.1824	1.179	1.2779	0.3538	yes	C11049	-	-	-	-	-	-	HMDB0034081;HMDB0041130	Lipids and lipid-like molecules	Steroids and steroid derivatives	Steroid lactones	72962-43-7;78821-43-9	479.338	6.49982	M-H	C28H48O6	0	30.7	neg
neg_2850	R-limonene	metab_9806	0.0001522	0.0003081	1.1823	1.1723	1.3982	0.4836	yes	C06099	-	-	map01100;map01110;map00903;map00902;map01062	Metabolic pathways;Biosynthesis of secondary metabolites;Limonene and pinene degradation;Monoterpenoid biosynthesis;Biosynthesis of terpenoids and steroids	Metabolism;Metabolism;Metabolism;Metabolism;Metabolism	Global and overview maps;Global and overview maps;Metabolism of terpenoids and polyketides;Metabolism of terpenoids and polyketides;Chemical structure transformation maps	HMDB0003375;HMDB0257077	Lipids and lipid-like molecules	Prenol lipids	Monoterpenoids	5989-27-5	229.108	5.51037	M+FA-H	C10H16O3	0	36.7	neg
pos_7337	Dihydro-3-hydroxy-4,4-dimethyl-2(3H)-Furanone	metab_6982	7.6e-07	2.97e-06	1.1822	1.18	1.2792	0.3552	yes	-	-	-	-	-	-	-	-	-	-	-	-	148.097	1.5976	M+NH4	C6H10O3	0	30.2	pos
pos_7119	3-O-Demethylfortimicin A	metab_6745	0.0002285	0.0004313	1.181	1.1872	1.4229	0.5088	yes	-	-	-	-	-	-	-	HMDB0245956	Organic oxygen compounds	Organooxygen compounds	Carbohydrates and carbohydrate conjugates	-	356.229	2.66798	M+H-2H2O	C16H33N5O6	0	71.8	pos
neg_7407	Oxiracetam	metab_14845	9.54e-06	2.87e-05	1.18	1.1845	0.7729	-0.3716	yes	-	-	-	-	-	-	-	HMDB0255986	Organic acids and derivatives	Carboxylic acids and derivatives	Amino acids, peptides, and analogues	-	203.067	0.946067	M+FA-H	C6H10N2O3	0	46.4	neg
pos_4608	7-Ketolithocholic Acid	metab_3975	3.5e-09	5.06e-08	1.1795	1.1786	1.2073	0.2718	yes	-	-	-	-	-	-	-	HMDB0000467;MJDBDZS0000016	Lipids and lipid-like molecules	Steroids and steroid derivatives	Bile acids, alcohols and derivatives	4651-67-6	408.31	6.48037	M+NH4	C24H38O4	83.6	0	pos
pos_2521	Austdiol	metab_1682	6.86e-05	0.0001478	1.1789	1.1822	0.7432	-0.4282	yes	-	-	-	-	-	-	-	HMDB0030858	Organoheterocyclic compounds	Azaphilones	Not Available	53043-28-0	254.102	3.65708	M+NH4	C12H12O5	0	66.1	pos
pos_390	7,8-diaminopelargonate	metab_3193	0.0002415	0.0004535	1.1785	1.1771	1.2625	0.3362	yes	C01037	-	-	map01100;map00780;map01240	Metabolic pathways;Biotin metabolism;Biosynthesis of cofactors	Metabolism;Metabolism;Metabolism	Global and overview maps;Metabolism of cofactors and vitamins;Global and overview maps	HMDB0304236	Lipids and lipid-like molecules	Fatty Acyls	Fatty acids and conjugates	-	230.186	1.85303	M+H-H2O, M+ACN+H	C9H20N2O2	0	38.6	pos
neg_5375	Thromboxane B2	metab_12599	1.36e-07	1.01e-06	1.1783	1.1788	1.3492	0.4321	yes	C05963	Lipids	Eicosanoids	map00590;map01100;map04976;map04726	Arachidonic acid metabolism;Metabolic pathways;Bile secretion;Serotonergic synapse	Metabolism;Metabolism;Organismal Systems;Organismal Systems	Lipid metabolism;Global and overview maps;Digestive system;Nervous system	HMDB0003252;PW_C001820;LMFA03030002	Lipids and lipid-like molecules	Fatty Acyls	Eicosanoids	54397-85-2	351.218	5.26573	M-H2O-H	C20H34O6	0	38.8	neg
pos_596	Indole-3-Carboxylic Acid	metab_5461	5.73e-09	7.05e-08	1.1778	1.1747	1.2382	0.3083	yes	C19837	-	-	-	-	-	-	HMDB0003320;MJDBOTE0000454	Organoheterocyclic compounds	Indoles and derivatives	Indolecarboxylic acids and derivatives	771-50-6	162.055	3.76145	M+H-H2O, M+H	C9H7NO2	51	0	pos
pos_7361	D-Digitoxose	metab_7009	3.15e-08	2.31e-07	1.1776	1.1753	1.2972	0.3754	yes	C21045	-	-	-	-	-	-	HMDB0251279	Organic oxygen compounds	Organooxygen compounds	Carbohydrates and carbohydrate conjugates	-	190.107	1.39013	M+ACN+H	C6H12O4	0	53.2	pos
neg_4673	PA(20:5(7Z,9Z,11E,13E,17Z)-3OH(5,6,15)/2:0)	metab_11821	2.21e-06	8.76e-06	1.1774	1.1799	1.2934	0.3711	yes	-	-	-	-	-	-	-	HMDB0266556	Not Available	Not Available	Not Available	-	567.194	6.1106	M+Na-2H	C25H39O11P	0	84.4	neg
neg_6858	Elenolide	metab_14239	5.01e-09	9.39e-08	1.1773	1.1771	1.309	0.3885	yes	C09506	-	-	-	-	-	-	HMDB0030018	Organoheterocyclic compounds	Pyrans	Pyranones and derivatives	24582-91-0	269.067	3.3988	M+FA-H	C11H12O5	0	53	neg
pos_3423	Tyr-ile-gly-ser-arg	metab_2674	1.15e-08	1.13e-07	1.1773	1.1794	1.3299	0.4114	yes	-	-	-	-	-	-	-	HMDB0259343	Organic acids and derivatives	Carboxylic acids and derivatives	Amino acids, peptides, and analogues	-	639.284	6.1152	M+2Na-H	C26H42N8O8	0	46.4	pos
neg_2102	N-[(3a,5b,7a,12a)-3,7-dihydroxy-24-oxo-12-(sulfooxy)cholan-24-yl]-Glycine	metab_8980	5.36e-08	4.98e-07	1.1773	1.1793	0.7208	-0.4724	yes	-	-	-	-	-	-	-	HMDB0002644	Lipids and lipid-like molecules	Steroids and steroid derivatives	Bile acids, alcohols and derivatives	74723-17-4	544.262	4.19432	M-H	C26H43NO9S	0	71.4	neg
neg_6443	Camonagrel	metab_13781	5.38e-05	0.0001245	1.1769	1.1677	1.3231	0.4039	yes	-	-	-	-	-	-	-	HMDB0249574	Benzenoids	Indanes	Not Available	-	307.086	3.82435	M+Cl	C15H16N2O3	0	32.7	neg
neg_6327	Trimethoprim	metab_13652	4.7e-05	0.0001111	1.1763	1.1821	0.7355	-0.4432	yes	C01965	-	-	-	-	-	-	HMDB0014583;MJDBOTE0000822	Benzenoids	Phenol ethers	Anisoles	738-70-5	335.135	3.93453	M+FA-H	C14H18N4O3	0	37.8	neg
pos_7086	(9Z)-(13S)-12,13-epoxyoctadeca-9,11-dienoate	metab_6708	0.0008395	0.001383	1.1761	1.1924	1.3552	0.4385	yes	C04594	-	-	-	-	-	-	HMDB0303983	Lipids and lipid-like molecules	Fatty Acyls	Fatty acids and conjugates	-	294.217	2.71615	M+H	C18H29O3-	0	35	pos
pos_5175	Isogingerenone B	metab_4598	5.61e-05	0.0001236	1.176	1.1809	0.7418	-0.4309	yes	-	-	-	-	-	-	-	HMDB0035404	Phenylpropanoids and polyketides	Diarylheptanoids	Linear diarylheptanoids	128700-99-2	428.21	5.8998	M+ACN+H	C22H26O6	0	39.2	pos
pos_3222	Nicotine glucuronide	metab_2455	1.88e-06	6.43e-06	1.1757	1.1688	1.2938	0.3716	yes	-	-	-	-	-	-	-	PW_C000985;HMDB0001272	Nucleosides, nucleotides, and analogues	Purine nucleotides	Purine ribonucleotides	152306-59-7	303.134	5.67548	M+H-2H2O	C16H22N2O6	0	48.5	pos
pos_3412	Epipregnanolone	metab_7715	3.06e-06	9.84e-06	1.1755	1.1796	1.3047	0.3837	yes	C15484;C11825	-	-	-	-	-	-	HMDB0001471;HMDB0245902;LMST02030185;HMDB0001455	Lipids and lipid-like molecules	Steroids and steroid derivatives	Pregnane steroids	516-55-2;128-21-2	341.247	6.08332	M+Na	C21H34O2	0	47.6	pos
pos_1089	(4E,15Z)-Bilirubin	metab_100	0.002426	0.00364	1.1752	1.1698	1.366	0.45	yes	-	-	-	-	-	-	-	HMDB0000488	Organoheterocyclic compounds	Tetrapyrroles and derivatives	Bilirubins	69853-43-6	585.27	6.9176	M+H, M+Na	C33H36N4O6	0	51.3	pos
pos_6762	Asn Asp Ile	metab_6349	0.0001064	0.000218	1.1751	1.1852	0.7255	-0.4629	yes	-	-	-	-	-	-	-	-	-	-	-	-	361.172	3.06492	M+H	C14H24N4O7	40	0	pos
pos_6226	Apramycin	metab_5758	0.0004874	0.0008446	1.1747	1.1738	0.714	-0.4861	yes	C01555	-	-	map00524	Neomycin, kanamycin and gentamicin biosynthesis	Metabolism	Biosynthesis of other secondary metabolites	HMDB0248529	Organic oxygen compounds	Organooxygen compounds	Carbohydrates and carbohydrate conjugates	37321-09-8	504.266	3.8506	M+H-2H2O	C21H41N5O11	0	60.4	pos
neg_7333	Malic Acid	metab_15381	2.88e-06	1.09e-05	1.1742	1.1799	0.7937	-0.3333	yes	C00149	Organic acids	Carboxylic acids	map01110;map05211;map01200;map00620;map00020;map00630;map04964;map00710;map04922;map01066;map01065;map04742;map01063;map01062;map01061;map01060;map01100;map01120;map05200;map00680;map01064;map00720;map02020;map05230;map01070	Biosynthesis of secondary metabolites;Renal cell carcinoma;Carbon metabolism;Pyruvate metabolism;Citrate cycle (TCA cycle);Glyoxylate and dicarboxylate metabolism;Proximal tubule bicarbonate reclamation;Carbon fixation in photosynthetic organisms;Glucagon signaling pathway;Biosynthesis of alkaloids derived from terpenoid and polyketide;Biosynthesis of alkaloids derived from histidine and purine;T…	Metabolism;Human Diseases;Metabolism;Metabolism;Metabolism;Metabolism;Organismal Systems;Metabolism;Organismal Systems;Metabolism;Metabolism;Organismal Systems;Metabolism;Metabolism;Metabolism;Metabolism;Metabolism;Metabolism;Human Diseases;Metabolism;Metabolism;Metabolism;Environmental Information Processing;Human Diseases;Metabolism	Global and overview maps;Cancer: specific types;Global and overview maps;Carbohydrate metabolism;Carbohydrate metabolism;Carbohydrate metabolism;Excretory system;Energy metabolism;Endocrine system;Chemical structure transformation maps;Chemical structure transformation maps;Sensory system;Chemical structure transformation maps;Chemical structure transformation maps;Chemical structure transformati…	PW_C000592;HMDB0000156;MJDBOTE0000694	Organic acids and derivatives	Hydroxy acids and derivatives	Beta hydroxy acids and derivatives	97-67-6;617-48-1;6915-15-7	133.013	1.11043	M-H	C4H6O5	97.4	0	neg
neg_5863	20-Carboxyleukotriene B4	metab_13140	1.79e-07	1.23e-06	1.174	1.1742	1.3499	0.4328	yes	C05950	-	-	map00590	Arachidonic acid metabolism	Metabolism	Lipid metabolism	HMDB0245560;HMDB0012641;HMDB0006059	Lipids and lipid-like molecules	Fatty Acyls	Fatty acids and conjugates	80434-82-8	365.197	4.5145	M-H	C20H30O6	0	44.4	neg
neg_1455	Sampatrilat	metab_8262	4.97e-08	4.71e-07	1.1736	1.1761	0.7301	-0.4538	yes	-	-	-	-	-	-	-	HMDB0257476	Organic acids and derivatives	Peptidomimetics	Hybrid peptides	-	605.225	3.3753	M+Na-2H	C26H40N4O9S	0	80.5	neg
neg_1250	5-Deoxy-D-ribose	metab_8035	0.006133	0.008569	1.1731	1.1862	0.7098	-0.4945	yes	C22288	-	-	-	-	-	-	HMDB0246776	Organic oxygen compounds	Organooxygen compounds	Carbohydrates and carbohydrate conjugates	-	401.167	2.89692	3M-H	C5H10O4	0	48.9	neg
neg_6757	3-Acetylphenol sulfate	metab_14128	0.0001277	0.0002636	1.1725	1.1748	0.6951	-0.5246	yes	-	-	-	-	-	-	-	HMDB0304930	Organic oxygen compounds	Organooxygen compounds	Carbonyl compounds	-	261.007	3.49345	M+FA-H	C8H8O5S	0	48	neg
neg_2828	Tyr-pro-leu-gly-NH2	metab_9781	2.12e-05	5.66e-05	1.1724	1.174	0.7222	-0.4695	yes	-	-	-	-	-	-	-	HMDB0259345	Organic acids and derivatives	Carboxylic acids and derivatives	Amino acids, peptides, and analogues	-	492.248	5.4712	M+FA-H	C22H33N5O5	0	43.7	neg
neg_5602	Solavetivone	metab_12852	4.76e-05	0.0001122	1.1724	1.175	0.6948	-0.5254	yes	C09737	-	-	map01110;map00909	Biosynthesis of secondary metabolites;Sesquiterpenoid and triterpenoid biosynthesis	Metabolism;Metabolism	Global and overview maps;Metabolism of terpenoids and polyketides	HMDB0035657	Lipids and lipid-like molecules	Prenol lipids	Sesquiterpenoids	54878-25-0	255.114	4.9193	M+K-2H	C15H22O	0	35.5	neg
neg_5915	Estrone-2,3-quinone	metab_13198	6.22e-05	0.0001414	1.1722	1.1699	0.6781	-0.5604	yes	-	-	-	-	-	-	-	HMDB0012941	Lipids and lipid-like molecules	Steroids and steroid derivatives	Estrane steroids	40551-33-5	305.117	4.4443	M+Na-2H	C18H20O3	0	46.2	neg
pos_4565	Alpha-curcumene	metab_3928	3.5e-05	8.14e-05	1.1721	1.1739	1.3185	0.3989	yes	C09649	-	-	-	-	-	-	HMDB0061838;HMDB0059878;LMPR0103060015	Lipids and lipid-like molecules	Prenol lipids	Sesquiterpenoids	4176-17-4	203.179	6.54405	M+H	C15H22	40.2	0	pos
neg_3240	Cortolone	metab_10236	1.33e-08	1.83e-07	1.1716	1.1743	1.2729	0.3481	yes	C05481	-	-	map00140	Steroid hormone biosynthesis	Metabolism	Lipid metabolism	LMST02030227;HMDB0003128	Lipids and lipid-like molecules	Steroids and steroid derivatives	Hydroxysteroids	516-42-7	365.233	6.14142	M-H	C21H34O5	0	68.6	neg
neg_3798	Taurochenodeoxycholate-7-sulfate	metab_10851	8.77e-09	1.39e-07	1.1716	1.1715	0.8048	-0.3134	yes	-	-	-	-	-	-	-	LMST05020030;HMDB0002498	Lipids and lipid-like molecules	Steroids and steroid derivatives	Bile acids, alcohols and derivatives	66874-12-2	578.246	7.60143	M-H	C26H45NO9S2	0	84.1	neg
pos_5583	(2E)-Piperamide-C5:1	metab_5046	2.68e-08	2.06e-07	1.1713	1.1683	1.2971	0.3753	yes	-	-	-	-	-	-	-	HMDB0038834	Organoheterocyclic compounds	Benzodioxoles	Not Available	117137-65-2	291.17	5.08175	M+NH4	C16H19NO3	0	41.1	pos
pos_3121	19-Noraldosterone	metab_2344	1.66e-07	8.45e-07	1.1713	1.1698	1.2756	0.3511	yes	-	-	-	-	-	-	-	HMDB0041795	Lipids and lipid-like molecules	Steroids and steroid derivatives	Hydroxysteroids	76025-75-7	385.142	5.33777	M+K	C20H26O5	0	48.9	pos
pos_5956	8-Acetamido-2-Methyl-7-Oxononanoic Acid	metab_5457	0.01941	0.02462	1.1706	1.1593	1.6066	0.684	yes	-	-	-	-	-	-	-	-	-	-	-	-	276.18	4.32603	M+CH3OH+H	C12H21NO4	51.2	0	pos
neg_1488	Clethodim	metab_8298	3.4e-10	1.82e-08	1.1706	1.1708	0.7807	-0.3572	yes	C18609	-	-	-	-	-	-	HMDB0250319	Organic oxygen compounds	Organooxygen compounds	Carbonyl compounds	99129-21-2	340.115	3.41445	M-H2O-H	C17H26ClNO3S	0	56.1	neg
neg_2020	Diethylenetriamine crosslinked with epichlorohydrin	metab_8890	0.0008424	0.00142	1.1701	1.1738	0.7421	-0.4304	yes	-	-	-	-	-	-	-	HMDB0032216	Benzenoids	Benzene and substituted derivatives	Phenylbutylamines	25085-17-0	569.294	4.08403	2M+Hac-H	C14H22ClNO	0	32.1	neg
pos_6847	Val Glu Thr Glu	metab_6443	0.002727	0.004049	1.1699	1.171	0.7504	-0.4143	yes	-	-	-	-	-	-	-	-	-	-	-	-	477.219	2.9455	M+H	C19H32N4O10	49.6	0	pos
neg_2986	20-Carboxy-leukotriene B4	metab_9954	1.17e-08	1.71e-07	1.1698	1.1697	1.2641	0.3381	yes	C05950	-	-	map00590	Arachidonic acid metabolism	Metabolism	Lipid metabolism	PW_C002644;LMFA03020016;HMDB0006059	Lipids and lipid-like molecules	Fatty Acyls	Fatty acids and conjugates	80434-82-8	365.197	5.79305	M-H	C20H30O6	0	31.4	neg
neg_6959	Acrylamide-sodium acrylate resin	metab_14351	2.06e-05	5.53e-05	1.1698	1.1663	1.4631	0.5491	yes	-	-	-	-	-	-	-	HMDB0303186	Lipids and lipid-like molecules	Fatty Acyls	Fatty acids and conjugates	-	218.103	3.31982	M+FA-H	C8H15NO3	0	44.6	neg
pos_6311	Nonate	metab_5853	0.00148	0.002313	1.1697	1.1595	1.4904	0.5757	yes	-	-	-	-	-	-	-	HMDB0011717	Lipids and lipid-like molecules	Fatty Acyls	Fatty acids and conjugates	-	171.102	3.71343	M+H-H2O	C9H16O4	0	34.2	pos
pos_2403	(2S)-2-Butanol O-[b-D-Apiofuranosyl-(1->6)-b-D-glucopyranoside]	metab_1551	6.22e-07	2.5e-06	1.1696	1.1704	0.7867	-0.3461	yes	-	-	-	-	-	-	-	HMDB0041255	Organic oxygen compounds	Organooxygen compounds	Carbohydrates and carbohydrate conjugates	-	401.203	3.39213	M+CH3OH+H	C15H28O10	0	32.9	pos
neg_127	2-(Carbamoylamino)propanoic acid	metab_8056	4.36e-05	0.0001041	1.1695	1.1682	0.7794	-0.3596	yes	-	-	-	-	-	-	-	HMDB0242123	Organic acids and derivatives	Carboxylic acids and derivatives	Amino acids, peptides, and analogues	-	131.045	0.90695	M-H2O-H, M-H	C4H8N2O3	0	35.2	neg
neg_5564	Linalool oxide D 3-[apiosyl-(1->6)-glucoside]	metab_12809	6.24e-08	5.57e-07	1.169	1.1715	0.718	-0.478	yes	-	-	-	-	-	-	-	HMDB0031367	Organic oxygen compounds	Organooxygen compounds	Carbohydrates and carbohydrate conjugates	-	463.22	4.98267	M-H	C21H36O11	0	72.5	neg
pos_5911	(R)-3-Hydroxyoctanoic acid	metab_5408	0.01331	0.01742	1.169	1.1546	1.5163	0.6005	yes	-	-	-	-	-	-	-	PW_C006730;HMDB0010722	Organic acids and derivatives	Hydroxy acids and derivatives	Medium-chain hydroxy acids and derivatives	-	362.253	4.40652	2M+ACN+H	C8H16O3	0	35.7	pos
neg_4819	Taurocholic acid 3-sulfate	metab_11983	5.68e-07	3.04e-06	1.1684	1.1629	0.8324	-0.2647	yes	-	-	-	-	-	-	-	HMDB0002581;LMST05020031	Lipids and lipid-like molecules	Steroids and steroid derivatives	Steroidal glycosides	67030-62-0	296.617	5.95487	M-2H	C26H45NO10S2	0	79.6	neg
neg_4980	Epsilon-Caprolactone	metab_12161	0.002493	0.003773	1.1682	1.1559	1.418	0.5038	yes	C01880	-	-	map01220;map00930;map01120	Degradation of aromatic compounds;Caprolactam degradation;Microbial metabolism in diverse environments	Metabolism;Metabolism;Metabolism	Global and overview maps;Xenobiotics biodegradation and metabolism;Global and overview maps	HMDB0000453;HMDB0060476	Organoheterocyclic compounds	Lactones	Delta valerolactones	823-22-3;502-44-3	273.134	5.85298	2M+FA-H	C6H10O2	0	33.8	neg
pos_3282	L-Monomenthyl glutarate	metab_2519	0.01675	0.02144	1.1679	1.1475	1.4521	0.5381	yes	-	-	-	-	-	-	-	HMDB0303264	Lipids and lipid-like molecules	Prenol lipids	Monoterpenoids	-	271.19	5.85188	M+H	C15H26O4	0	30.7	pos
pos_5738	Lysylphenylalanine	metab_5216	0.001332	0.002096	1.1672	1.1782	0.7	-0.5147	yes	-	-	-	-	-	-	-	HMDB0028958;HMDB0304786	Organic acids and derivatives	Carboxylic acids and derivatives	Amino acids, peptides, and analogues	6235-35-4	316.166	4.76035	M+Na	C15H23N3O3	0	32.8	pos
neg_2117	Small bacteriocin	metab_8996	2.54e-08	2.86e-07	1.167	1.1681	0.7184	-0.4772	yes	-	-	-	-	-	-	-	HMDB0033503	Organic acids and derivatives	Carboxylic acids and derivatives	Amino acids, peptides, and analogues	172617-17-3	362.175	4.21782	M+K-2H	C18H31NO4	0	35.9	neg
pos_4107	PC(18:1(9Z)e/2:0)	metab_3423	0.0008175	0.001351	1.1666	1.1536	0.7935	-0.3336	yes	C04598	-	-	map00565;map01100;map04080;map05310	Ether lipid metabolism;Metabolic pathways;Neuroactive ligand-receptor interaction;Asthma	Metabolism;Metabolism;Environmental Information Processing;Human Diseases	Lipid metabolism;Global and overview maps;Signaling molecules and interaction;Immune disease	HMDB0011148	Lipids and lipid-like molecules	Glycerophospholipids	Glycerophosphocholines	-	572.368	7.67213	M+Na	C28H56NO7P	0	78.4	pos
neg_4389	LysoPS(18:2(9Z,12Z)/0:0)	metab_11506	0.0001379	0.0002821	1.1664	1.1661	0.758	-0.3997	yes	-	-	-	-	-	-	-	HMDB0240604	Lipids and lipid-like molecules	Glycerophospholipids	Glycerophosphoserines	1218913-82-6	520.268	6.50763	M-H	C24H44NO9P	0	45.7	neg
pos_5598	Artecanin	metab_7706	0.00793	0.01074	1.1653	1.1477	1.5534	0.6354	yes	C09302	-	-	-	-	-	-	HMDB0302700	Lipids and lipid-like molecules	Prenol lipids	Terpene lactones	29431-84-3	296.147	5.05775	M+NH4	C15H18O5	0	38.2	pos
neg_6112	Repaglinide	metab_13417	8.99e-08	7.27e-07	1.1652	1.1672	0.7226	-0.4686	yes	C07670	-	-	-	-	-	-	PW_C009360;HMDB0015048;MJDBOTE0001384	Organoheterocyclic compounds	Piperidines	Phenylpiperidines	135062-02-1	489.22	4.17083	M+K-2H	C27H36N2O4	0	59.2	neg
pos_5313	Alanylleucine	metab_4750	2.52e-07	1.18e-06	1.1636	1.161	1.3389	0.421	yes	-	-	-	-	-	-	-	HMDB0251509;HMDB0028691	Organic acids and derivatives	Carboxylic acids and derivatives	Amino acids, peptides, and analogues	3303-34-2	427.255	5.65148	2M+Na	C9H18N2O3	0	37.4	pos
pos_6627	Latrunculin a	metab_6201	6.72e-05	0.0001451	1.163	1.1606	1.3053	0.3844	yes	C16901	-	-	-	-	-	-	HMDB0253989	Phenylpropanoids and polyketides	Macrolides and analogues	Not Available	76343-93-6	466.161	3.24138	M+2Na-H	C22H31NO5S	0	41.3	pos
pos_7143	1-(beta-D-Ribofuranosyl)-1,4-dihydronicotinamide	metab_6772	2.36e-05	5.74e-05	1.1624	1.1636	0.7769	-0.3641	yes	C15497	-	-	-	-	-	-	HMDB0011648;HMDB0011643	Organic oxygen compounds	Organooxygen compounds	Carbohydrates and carbohydrate conjugates	-	239.102	2.61212	M+H-H2O	C11H16N2O5	0	63.2	pos
neg_2329	4-Hydroxy-3-methoxy-cinnamoylglycine	metab_9230	1.77e-06	7.33e-06	1.162	1.1648	0.6937	-0.5276	yes	C02564	-	-	-	-	-	-	HMDB0059747	Organic acids and derivatives	Carboxylic acids and derivatives	Amino acids, peptides, and analogues	-	250.072	4.59687	M-H	C12H13NO5	0	65.9	neg
neg_6939	Neoacrimarine K	metab_14329	0.01202	0.01589	1.1618	1.1785	1.6143	0.6909	yes	-	-	-	-	-	-	-	HMDB0033192	Organoheterocyclic compounds	Quinolines and derivatives	Benzoquinolines	217199-09-2	540.168	3.32765	M-H2O-H	C31H29NO9	0	75.3	neg
pos_2771	Calonectrin	metab_1956	3.17e-07	1.42e-06	1.1618	1.1606	1.4118	0.4976	yes	-	-	-	-	-	-	-	HMDB0034915	Lipids and lipid-like molecules	Prenol lipids	Sesquiterpenoids	-	389.137	4.29402	M+K	C19H26O6	0	41.8	pos
pos_5330	N-Nervonoyl Glutamine	metab_4769	0.01364	0.01783	1.1613	1.1653	1.4804	0.566	yes	-	-	-	-	-	-	-	HMDB0242089	Not Available	Not Available	Not Available	-	536.442	5.6036	M+ACN+H	C29H54N2O4	0	76.4	pos
pos_2936	Beta-Tyrosine	metab_2137	5.26e-09	6.65e-08	1.1609	1.1612	1.2677	0.3422	yes	C04368	-	-	map00350	Tyrosine metabolism	Metabolism	Amino acid metabolism	HMDB0003831	Organic acids and derivatives	Carboxylic acids and derivatives	Amino acids, peptides, and analogues	-	164.071	4.78507	M+H-H2O	C9H11NO3	0	68.4	pos
neg_5291	Triglyceride palmitate	metab_12507	0.002308	0.00352	1.1605	1.1491	0.7435	-0.4276	yes	-	-	-	-	-	-	-	HMDB0259215	Organic acids and derivatives	Carboxylic acids and derivatives	Tetracarboxylic acids and derivatives	-	499.255	5.3722	M-H2O-H	C25H42O11	0	74.1	neg
neg_2389	Plazomicin	metab_9294	1.11e-07	8.65e-07	1.16	1.1618	0.7362	-0.4418	yes	-	-	-	-	-	-	-	HMDB0256636	Organic acids and derivatives	Carboxylic acids and derivatives	Amino acids, peptides, and analogues	-	613.321	4.69113	M+Na-2H	C25H48N6O10	0	75.8	neg
pos_4824	3a,7a,12a-Trihydroxy-5b-cholestan-26-al	metab_4211	1.89e-07	9.32e-07	1.1598	1.1627	1.2448	0.3159	yes	C01301	-	-	map01100;map00120	Metabolic pathways;Primary bile acid biosynthesis	Metabolism;Metabolism	Global and overview maps;Lipid metabolism	PW_C001913;HMDB0003533	Lipids and lipid-like molecules	Steroids and steroid derivatives	Bile acids, alcohols and derivatives	3836-01-09	457.331	6.21863	M+Na	C27H46O4	0	60.3	pos
neg_1770	Desciclovir	metab_8611	6.42e-08	5.7e-07	1.1593	1.1615	0.7292	-0.4557	yes	-	-	-	-	-	-	-	HMDB0251033	Organoheterocyclic compounds	Imidazopyrimidines	Purines and purine derivatives	-	463.184	3.75317	2M+FA-H	C8H11N5O2	0	55.4	neg
neg_6318	Xanthine amine congener	metab_13642	0.01862	0.02393	1.1588	1.1651	0.6789	-0.5588	yes	-	-	-	-	-	-	-	HMDB0259918	Organoheterocyclic compounds	Imidazopyrimidines	Purines and purine derivatives	-	463.184	3.94237	M+Cl	C21H28N6O4	0	60.5	neg
neg_5668	Chymostatin	metab_12923	6.74e-07	3.46e-06	1.1587	1.1597	0.7303	-0.4535	yes	C11308	-	-	-	-	-	-	HMDB0242696	Lipids and lipid-like molecules	Steroids and steroid derivatives	Vitamin D and derivatives	9076-44-2	588.289	4.81148	M-H2O-H	C31H41N7O6	0	72.6	neg
neg_2400	2-Hydroxy-3-(4-hydroxyphenyl)propenoic acid	metab_9308	4.54e-07	2.55e-06	1.1583	1.1533	1.4571	0.5431	yes	C05350	-	-	map01100;map00350	Metabolic pathways;Tyrosine metabolism	Metabolism;Metabolism	Global and overview maps;Amino acid metabolism	HMDB0006915;PW_C003007	Benzenoids	Benzene and substituted derivatives	Phenylpyruvic acid derivatives	-	225.04	4.71673	M+FA-H	C9H8O4	0	31.4	neg
neg_2347	(2E,8E)-10-hydroxydeca-2,8-dien-4-ynoylcarnitine	metab_9250	0.0001158	0.0002416	1.1582	1.1598	0.7099	-0.4943	yes	-	-	-	-	-	-	-	HMDB0241109	Lipids and lipid-like molecules	Fatty Acyls	Fatty acid esters	-	344.146	4.61845	M+Na-2H	C17H25NO5	0	31.1	neg
pos_793	Prostaglandin E3	metab_7467	1.64e-07	8.36e-07	1.158	1.1543	1.298	0.3762	yes	C06439	Lipids	Eicosanoids	-	-	-	-	LMFA03010135;HMDB0247474;HMDB0002664	Lipids and lipid-like molecules	Fatty Acyls	Eicosanoids	802-31-3	315.195	5.61958	M+H-2H2O, M+H	C20H30O5	0	36.2	pos
pos_35	16-B1-phytoprostane	metab_2757	0.0003761	0.0006749	1.1577	1.1493	1.2347	0.3041	yes	-	-	-	-	-	-	-	HMDB0304634	Lipids and lipid-like molecules	Fatty Acyls	Eicosanoids	-	291.195	6.01948	M+H-H2O, M+NH4, M+K, M+H	C18H28O4	0	53.7	pos
neg_2914	Pelargonic acid	metab_9877	0.003868	0.005618	1.1573	1.143	1.4364	0.5225	yes	C01601	-	-	-	-	-	-	LMFA01010009;HMDB0000847	Lipids and lipid-like molecules	Fatty Acyls	Fatty acids and conjugates	112-05-0	203.128	5.6461	M+FA-H	C9H18O2	0	38.1	neg
neg_750	PA(8:0/8:0)	metab_14947	1.55e-05	4.35e-05	1.1572	1.1579	0.7477	-0.4195	yes	C00416	Lipids	Phospholipids	map01100;map00564;map01110;map00561;map05212;map05200;map04975;map04024;map05231;map04072;map04912;map04070;map04666	Metabolic pathways;Glycerophospholipid metabolism;Biosynthesis of secondary metabolites;Glycerolipid metabolism;Pancreatic cancer;Pathways in cancer;Fat digestion and absorption;cAMP signaling pathway;Choline metabolism in cancer;Phospholipase D signaling pathway;GnRH signaling pathway;Phosphatidylinositol signaling system;Fc gamma R-mediated phagocytosis	Metabolism;Metabolism;Metabolism;Metabolism;Human Diseases;Human Diseases;Organismal Systems;Environmental Information Processing;Human Diseases;Environmental Information Processing;Organismal Systems;Environmental Information Processing;Organismal Systems	Global and overview maps;Lipid metabolism;Global and overview maps;Lipid metabolism;Cancer: specific types;Cancer: overview;Digestive system;Signal transduction;Cancer: overview;Signal transduction;Endocrine system;Signal transduction;Immune system	HMDB0114771;PW_C062186;LMGP10010021	Lipids and lipid-like molecules	Glycerophospholipids	Glycerophosphates	-	445.194	3.9267	M+Na-2H, M+K-2H	C19H37O8P	0	34.8	neg
pos_2250	4-Hydroxymandelonitrile	metab_7700	0.007775	0.01055	1.1566	1.1402	1.8399	0.8796	yes	C03742	-	-	map00460;map01100;map01110	Cyanoamino acid metabolism;Metabolic pathways;Biosynthesis of secondary metabolites	Metabolism;Metabolism;Metabolism	Metabolism of other amino acids;Global and overview maps;Global and overview maps	HMDB0060318	Benzenoids	Phenols	1-hydroxy-2-unsubstituted benzenoids	71807-09-5	150.055	3.06492	M+H	C8H7NO2	53.4	0	pos
pos_5174	Chenodeoxycholyltryptophan	metab_4597	0.0002967	0.0005462	1.1565	1.158	1.3199	0.4004	yes	-	-	-	-	-	-	-	HMDB0242395	Lipids and lipid-like molecules	Steroids and steroid derivatives	Bile acids, alcohols and derivatives	-	623.343	5.8998	M+2Na-H	C35H50N2O5	0	53.3	pos
neg_6880	Beta-D-3-Ribofuranosyluric acid	metab_14264	3.56e-06	1.29e-05	1.1564	1.1548	0.7521	-0.4111	yes	C05513	-	-	map01100;map00230	Metabolic pathways;Purine metabolism	Metabolism;Metabolism	Global and overview maps;Nucleotide metabolism	HMDB0029920	Organoheterocyclic compounds	Imidazopyrimidines	Purines and purine derivatives	2124-54-1	299.063	3.3753	M-H	C10H12N4O7	0	42.7	neg
pos_3808	Epsilon-Tocopherol	metab_3091	6.93e-06	1.98e-05	1.1547	1.155	1.2476	0.3192	yes	C14154	-	-	map01100;map00130;map01110	Metabolic pathways;Ubiquinone and other terpenoid-quinone biosynthesis;Biosynthesis of secondary metabolites	Metabolism;Metabolism;Metabolism	Global and overview maps;Metabolism of cofactors and vitamins;Global and overview maps	HMDB0304597;HMDB0030554;LMPR02020055	Lipids and lipid-like molecules	Prenol lipids	Quinone and hydroquinone lipids	490-23-3	393.314	7.56098	M+H-H2O	C28H42O2	0	84.3	pos
pos_5808	N-[2-(3,4-Dihydroxyphenyl)ethyl]octanamide	metab_5293	0.02864	0.03539	1.1546	1.1382	1.6403	0.714	yes	-	-	-	-	-	-	-	HMDB0255033	Benzenoids	Phenols	Benzenediols	-	297.217	4.60772	M+NH4	C16H25NO3	0	66.1	pos
pos_6796	Ne,Ne dimethyllysine	metab_6386	3.26e-06	1.04e-05	1.1543	1.1541	0.7092	-0.4958	yes	C05545	-	-	map01100;map00310	Metabolic pathways;Lysine degradation	Metabolism;Metabolism	Global and overview maps;Amino acid metabolism	HMDB0013287	Organic acids and derivatives	Carboxylic acids and derivatives	Amino acids, peptides, and analogues	-	157.134	3.02515	M+H-H2O	C8H18N2O2	0	41.5	pos
neg_3332	9,10-DiHOME	metab_10338	0.0001181	0.0002459	1.1536	1.1498	1.3093	0.3888	yes	C14828	-	-	map00591	Linoleic acid metabolism	Metabolism	Lipid metabolism	HMDB0004704;LMFA02000229	Lipids and lipid-like molecules	Fatty Acyls	Fatty acids and conjugates	125356-86-7	313.238	6.3203	M-H	C18H34O4	54.4	0	neg
pos_7033	4-Hydroxy-2,6,6-trimethyl-3-oxo-1,4-cyclohexadiene-1-carboxaldehyde	metab_6650	7.58e-07	2.97e-06	1.1534	1.1495	1.2954	0.3734	yes	-	-	-	-	-	-	-	HMDB0037602	Organic oxygen compounds	Organooxygen compounds	Carbonyl compounds	35692-95-6	198.112	2.77982	M+NH4	C10H12O3	0	31.5	pos
neg_6431	Ala-phe	metab_13768	1.54e-07	1.11e-06	1.1531	1.1525	0.7816	-0.3556	yes	-	-	-	-	-	-	-	HMDB0028694	Organic acids and derivatives	Carboxylic acids and derivatives	Amino acids, peptides, and analogues	3061-90-3	235.108	3.84	M-H	C12H16N2O3	89.5	0	neg
pos_1189	N-Arachidonoyl Threonine	metab_210	3e-09	4.54e-08	1.1531	1.1546	1.2209	0.2879	yes	-	-	-	-	-	-	-	HMDB0242004	Organic acids and derivatives	Carboxylic acids and derivatives	Amino acids, peptides, and analogues	-	406.295	6.35318	M+H, M+NH4	C24H39NO4	0	40	pos
pos_5905	posatirelin	metab_5401	5.7e-07	2.33e-06	1.153	1.156	0.787	-0.3456	yes	-	-	-	-	-	-	-	HMDB0256710	Organic acids and derivatives	Carboxylic acids and derivatives	Amino acids, peptides, and analogues	-	385.244	4.41453	M+CH3OH+H	C17H28N4O4	0	33.1	pos
neg_3060	Vulgarin	metab_10038	0.0114	0.01514	1.152	1.1422	1.5708	0.6515	yes	C09600	-	-	-	-	-	-	HMDB0036130	Lipids and lipid-like molecules	Prenol lipids	Terpene lactones	3162-56-9	285.113	5.89217	M+Na-2H	C15H20O4	0	57.8	neg
neg_2114	8-Hydroxy-5,6-octadienoic acid	metab_8993	0.001697	0.002662	1.151	1.1382	1.3719	0.4562	yes	-	-	-	-	-	-	-	HMDB0031101;LMFA01031076	Organic acids and derivatives	Hydroxy acids and derivatives	Medium-chain hydroxy acids and derivatives	-	201.076	4.21782	M+FA-H	C8H12O3	0	73.5	neg
neg_1504	Glutamylphenylalanine	metab_8317	6.01e-06	1.98e-05	1.1508	1.1513	0.797	-0.3274	yes	-	-	-	-	-	-	-	HMDB0029156	Organic acids and derivatives	Carboxylic acids and derivatives	Amino acids, peptides, and analogues	20556-22-3	293.114	3.43075	M-H	C14H18N2O5	0	80.5	neg
neg_4008	PC(17:2(9Z,12Z)/0:0)	metab_11085	5.41e-08	5.01e-07	1.1504	1.1529	0.77	-0.377	yes	-	-	-	-	-	-	-	LMGP01050127;HMDB0256157	Lipids and lipid-like molecules	Glycerophospholipids	Glycerophosphocholines	-	504.31	7.56232	M-H	C25H48NO7P	0	47	neg
pos_3728	Albigenic acid	metab_3005	1.1e-05	2.97e-05	1.1503	1.1467	1.2933	0.3711	yes	-	-	-	-	-	-	-	HMDB0036638	Lipids and lipid-like molecules	Prenol lipids	Triterpenoids	664-40-4	505.386	7.10802	M+CH3OH+H	C30H48O4	0	35.5	pos
pos_7061	5-Azanonane deriv.	metab_6681	0.002086	0.003173	1.1495	1.1396	0.6595	-0.6006	yes	-	-	-	-	-	-	-	HMDB0249975	Benzenoids	Benzene and substituted derivatives	Phenylbutylamines	-	301.679	2.756	M+H+Na	C29H49N5O7	0	49	pos
pos_2061	4-Fluoro-L-phenylalanine	metab_1175	2.52e-08	1.97e-07	1.1495	1.1509	0.7848	-0.3495	yes	C11217	-	-	-	-	-	-	HMDB0246423	Organic acids and derivatives	Carboxylic acids and derivatives	Amino acids, peptides, and analogues	-	430.157	2.69222	2M+ACN+Na	C9H10FNO2	0	33.1	pos
pos_520	Phthalimidinoglutarimide	metab_4626	5.33e-06	1.59e-05	1.1486	1.1489	0.7894	-0.3412	yes	-	-	-	-	-	-	-	HMDB0256503	Organoheterocyclic compounds	Isoindoles and derivatives	Isoindolines	-	262.119	3.23338	M+H, M+NH4	C13H12N2O3	0	51.6	pos
neg_6073	LysoPC(14:1(9Z)/0:0)	metab_13373	1.45e-05	4.11e-05	1.1486	1.141	0.7527	-0.4099	yes	C04230	Lipids	Phospholipids	map00564;map05231	Glycerophospholipid metabolism;Choline metabolism in cancer	Metabolism;Human Diseases	Lipid metabolism;Cancer: overview	HMDB0010380	Lipids and lipid-like molecules	Glycerophospholipids	Glycerophosphocholines	-	486.257	4.21782	M+Na-2H	C22H44NO7P	0	37.9	neg
neg_7085	3-Hydroxy-4-butanolide	metab_14492	5.53e-07	2.99e-06	1.1483	1.1453	1.3203	0.4009	yes	-	-	-	-	-	-	-	HMDB0034681	Organic oxygen compounds	Organooxygen compounds	Carbohydrates and carbohydrate conjugates	211107-44-7	285.062	3.20965	M+Na-2H	C10H16O8	0	48.1	neg
pos_2133	Phe Asp	metab_1254	5.62e-05	0.0001237	1.1481	1.1406	0.7835	-0.3521	yes	-	-	-	-	-	-	-	-	-	-	-	-	281.113	2.81167	M+H	C13H16N2O5	54.5	0	pos
neg_4344	11'-Carboxy-alpha-chromanol	metab_11457	1.31e-07	9.75e-07	1.1481	1.1433	1.2509	0.323	yes	-	-	-	-	-	-	-	HMDB0012515	Lipids and lipid-like molecules	Prenol lipids	Sesquiterpenoids	-	417.301	6.56238	M-H	C26H42O4	0	81.3	neg
neg_4574	Manoalide	metab_11712	0.000164	0.0003287	1.1473	1.1538	1.306	0.3852	yes	C17156	-	-	-	-	-	-	HMDB0254329;LMPR0105020001	Lipids and lipid-like molecules	Prenol lipids	Terpene lactones	75088-80-1	877.514	6.25042	2M+FA-H	C25H36O5	0	37.6	neg
neg_3096	(S)-[8]-Gingerol	metab_10077	3.44e-08	3.53e-07	1.1473	1.1473	1.2657	0.34	yes	C17495	-	-	-	-	-	-	HMDB0033615	Benzenoids	Phenols	Methoxyphenols	23513-08-8	367.212	5.91565	M+FA-H	C19H30O4	0	39.4	neg
pos_795	Adenosine, 8-(butylamino)-N-cyclopentyl-	metab_7469	0.002304	0.003472	1.1473	1.1574	0.7604	-0.3952	yes	-	-	-	-	-	-	-	HMDB0258096	Nucleosides, nucleotides, and analogues	Purine nucleosides	Not Available	-	407.239	5.61958	M+H, M+Na	C19H30N6O4	0	58	pos
neg_6625	Alanylisoleucine	metab_13982	0.0002003	0.0003915	1.1464	1.1524	0.6863	-0.5431	yes	-	-	-	-	-	-	-	HMDB0028690	Organic acids and derivatives	Carboxylic acids and derivatives	Amino acids, peptides, and analogues	29727-65-9	183.113	3.62713	M-H2O-H	C9H18N2O3	0	61.7	neg
pos_957	Homodolichosterone	metab_7647	2.92e-09	4.43e-08	1.1464	1.1446	1.2022	0.2656	yes	-	-	-	-	-	-	-	HMDB0034079	Lipids and lipid-like molecules	Steroids and steroid derivatives	Stigmastanes and derivatives	85797-14-4	459.347	6.77455	M+H-H2O, M+Na	C29H48O5	0	41.6	pos
pos_7193	L-Proline, 1-acetyl-4-hydroxy-, cis-	metab_6827	1.71e-07	8.66e-07	1.1462	1.1433	1.2542	0.3268	yes	-	-	-	-	-	-	-	HMDB0253913	Organic acids and derivatives	Carboxylic acids and derivatives	Amino acids, peptides, and analogues	-	138.055	2.51633	M+H-2H2O	C7H11NO4	0	38.5	pos
pos_1267	Undec-3-enedioylcarnitine	metab_297	0.01749	0.02233	1.1459	1.1311	1.4345	0.5205	yes	-	-	-	-	-	-	-	HMDB0241176	Lipids and lipid-like molecules	Fatty Acyls	Fatty acid esters	-	358.222	6.155	M+H-H2O, M+H	C18H31NO6	0	45.2	pos
neg_2513	2-Methoxy-5-methylaniline	metab_9433	5.09e-07	2.8e-06	1.1454	1.1483	1.3273	0.4085	yes	C19216	-	-	-	-	-	-	HMDB0245200	Benzenoids	Phenol ethers	Aminophenyl ethers	-	182.082	4.94343	M+FA-H	C8H11NO	0	34.8	neg
neg_1219	Glutaminylmethionine	metab_8000	0.0006671	0.001153	1.1451	1.1527	0.7181	-0.4777	yes	-	-	-	-	-	-	-	HMDB0028803	Organic acids and derivatives	Carboxylic acids and derivatives	Amino acids, peptides, and analogues	114659-59-5	276.102	2.38757	M-H	C10H19N3O4S	0	62.8	neg
neg_6446	Tryptophyl-Glycine	metab_13784	4.87e-05	0.0001146	1.1441	1.1442	0.7563	-0.403	yes	-	-	-	-	-	-	-	HMDB0029083	Organic acids and derivatives	Carboxylic acids and derivatives	Amino acids, peptides, and analogues	-	260.104	3.82435	M-H	C13H15N3O3	0	42.3	neg
pos_5529	Phenylalanylvaline	metab_4986	1.1e-08	1.1e-07	1.1438	1.1407	1.2724	0.3476	yes	-	-	-	-	-	-	-	HMDB0029008	Organic acids and derivatives	Carboxylic acids and derivatives	Amino acids, peptides, and analogues	3918-90-9	297.181	5.19377	M+CH3OH+H	C14H20N2O3	0	46.4	pos
pos_2841	4-Hydroxy-3-polyprenylbenzoate	metab_7697	0.007725	0.01049	1.1426	1.1459	0.665	-0.5886	yes	C18131	-	-	map00130;map01110	Ubiquinone and other terpenoid-quinone biosynthesis;Biosynthesis of secondary metabolites	Metabolism;Metabolism	Metabolism of cofactors and vitamins;Global and overview maps	HMDB0060388	Lipids and lipid-like molecules	Prenol lipids	Monoterpenoids	-	297.144	4.4792	M+Na	C17H22O3	0	54.2	pos
pos_3764	DG(20:1(11Z)/16:1(9Z)/0:0)	metab_3043	9.36e-08	5.29e-07	1.1418	1.1406	1.2466	0.318	yes	C00165	-	-	map05214;map05167;map04650;map05163;map04750;map05235;map04015;map04014;map04659;map04540;map04010;map04012;map05022;map04370;map04371;map04072;map04071;map04975;map05143;map05012;map05231;map05146;map04919;map05200;map04961;map04745;map04921;map04920;map04923;map04925;map05017;map04625;map04929;map04726;map04725;map04724;map04723;map04722;map05223;map04720;map04666;map05170;map04664;map04658;map…	Glioma;Kaposi sarcoma-associated herpesvirus infection;Natural killer cell mediated cytotoxicity;Human cytomegalovirus infection;Inflammatory mediator regulation of TRP channels;PD-L1 expression and PD-1 checkpoint pathway in cancer;Rap1 signaling pathway;Ras signaling pathway;Th17 cell differentiation;Gap junction;MAPK signaling pathway;ErbB signaling pathway;Pathways of neurodegeneration - mult…	Human Diseases;Human Diseases;Organismal Systems;Human Diseases;Organismal Systems;Human Diseases;Environmental Information Processing;Environmental Information Processing;Organismal Systems;Cellular Processes;Environmental Information Processing;Environmental Information Processing;Human Diseases;Environmental Information Processing;Environmental Information Processing;Environmental Information …	Cancer: specific types;Infectious disease: viral;Immune system;Infectious disease: viral;Sensory system;Cancer: overview;Signal transduction;Signal transduction;Immune system;Cellular community - eukaryotes;Signal transduction;Signal transduction;Neurodegenerative disease;Signal transduction;Signal transduction;Signal transduction;Signal transduction;Digestive system;Infectious disease: parasitic…	PW_C003440;HMDB0007389	Lipids and lipid-like molecules	Glycerolipids	Diradylglycerols	-	643.526	7.27513	M+Na	C39H72O5	0	93.6	pos
neg_2091	9-O-Acetylneuraminic acid	metab_8967	0.002587	0.003904	1.1417	1.1548	0.7273	-0.4594	yes	-	-	-	-	-	-	-	HMDB0255839	Organic oxygen compounds	Organooxygen compounds	Carbohydrates and carbohydrate conjugates	-	308.099	4.17865	M-H	C11H19NO9	0	36.1	neg
neg_1296	Isopenicillin N	metab_8085	0.002406	0.003655	1.1413	1.1433	0.6856	-0.5446	yes	C05557	-	-	map01100;map00311;map01110	Metabolic pathways;Penicillin and cephalosporin biosynthesis;Biosynthesis of secondary metabolites	Metabolism;Metabolism;Metabolism	Global and overview maps;Biosynthesis of other secondary metabolites;Global and overview maps	HMDB0253667	Organic acids and derivatives	Carboxylic acids and derivatives	Amino acids, peptides, and analogues	-	404.114	3.19398	M+FA-H	C14H21N3O6S	0	34	neg
neg_3940	Methoxymorpholinyldoxorubicin	metab_11009	8.37e-08	6.92e-07	1.1412	1.1441	0.7685	-0.3799	yes	-	-	-	-	-	-	-	HMDB0254553	Phenylpropanoids and polyketides	Anthracyclines	Not Available	-	678.195	7.60143	M+Cl	C32H37NO13	0	81.8	neg
pos_5185	Indole-3-Carbinol	metab_4609	3.1e-06	9.95e-06	1.1402	1.1384	1.3123	0.3921	yes	-	-	-	-	-	-	-	HMDB0005785	Organoheterocyclic compounds	Indoles and derivatives	Indoles	700-06-1	148.076	5.8918	M+H	C9H9NO	55	0	pos
pos_3521	Solanidine	metab_2781	0.0004894	0.0008476	1.1402	1.1472	0.7854	-0.3484	yes	C06543	-	-	map01066	Biosynthesis of alkaloids derived from terpenoid and polyketide	Metabolism	Chemical structure transformation maps	HMDB0003236;LMST01150007	Lipids and lipid-like molecules	Steroids and steroid derivatives	Steroidal alkaloids	80-78-4	461.348	6.36112	M+ACN+Na	C27H43NO	0	41.8	pos
pos_7087	Methionyl-Proline	metab_6709	0.0006518	0.001098	1.1398	1.1268	0.7862	-0.347	yes	-	-	-	-	-	-	-	HMDB0028981	Organic acids and derivatives	Carboxylic acids and derivatives	Amino acids, peptides, and analogues	-	247.111	2.71615	M+H	C10H18N2O3S	0	44.3	pos
pos_6005	Ginsenoside Rh8	metab_5513	6.47e-06	1.88e-05	1.1393	1.14	0.7604	-0.3951	yes	-	-	-	-	-	-	-	HMDB0039943	Lipids and lipid-like molecules	Prenol lipids	Triterpenoids	343780-69-8	681.393	4.22932	M+2Na-H	C36H60O9	0	31.6	pos
neg_2501	Dehydrocyanaropicrin	metab_9420	1.25e-05	3.6e-05	1.1386	1.1386	0.7622	-0.3918	yes	-	-	-	-	-	-	-	HMDB0035029	Lipids and lipid-like molecules	Prenol lipids	Terpene lactones	35821-02-4	381.076	4.91147	M+K-2H	C19H20O6	0	42.9	neg
pos_5621	Gln Ile Phe	metab_5088	1.91e-05	4.79e-05	1.1386	1.1437	0.7441	-0.4263	yes	-	-	-	-	-	-	-	-	-	-	-	-	407.229	5.00175	M+H	C20H30N4O5	80.6	0	pos
pos_5	Imiprothrin	metab_4405	2.75e-08	2.09e-07	1.1385	1.1379	1.2051	0.2691	yes	-	-	-	-	-	-	-	-	-	-	-	-	319.165	5.7721	M+H, M+Na, M+K, 2M+H, 2M+Na, M+H-H2O	C17H22N2O4	31.3	0	pos
neg_5692	1,2-Cyclohexanedicarboxylic acid	metab_12950	3.07e-08	3.29e-07	1.1382	1.1353	1.3431	0.4255	yes	-	-	-	-	-	-	-	HMDB0250649	Organic acids and derivatives	Carboxylic acids and derivatives	Dicarboxylic acids and derivatives	-	171.065	4.7733	M-H	C8H12O4	0	32.4	neg
neg_5537	2'-Deoxymugineic acid	metab_12779	1.73e-07	1.2e-06	1.1381	1.1406	0.7216	-0.4708	yes	C15485	-	-	-	-	-	-	HMDB0033909	Organic acids and derivatives	Carboxylic acids and derivatives	Amino acids, peptides, and analogues	74235-24-8	303.12	5.01605	M-H	C12H20N2O7	0	39.1	neg
neg_5654	DHAP(O-18:0)	metab_12908	0.03799	0.04645	1.1379	1.1578	0.6173	-0.6959	yes	-	-	-	-	-	-	-	HMDB0011142	Organic oxygen compounds	Organooxygen compounds	Carbonyl compounds	-	443.251	4.83355	M+Na-2H	C21H43O6P	0	43	neg
pos_139	Patchoulen-beta	metab_433	0.000396	0.0007057	1.1378	1.1307	1.2186	0.2852	yes	-	-	-	-	-	-	-	HMDB0304717	Lipids and lipid-like molecules	Fatty Acyls	Fatty alcohols	-	293.211	6.08332	M+CH3OH+H, M+K, M+H	C17H24O2	0	40.9	pos
pos_3360	Candoxatrilat	metab_2605	0.01511	0.01954	1.137	1.1224	1.4082	0.4938	yes	C11721	-	-	-	-	-	-	HMDB0249582	Organic acids and derivatives	Carboxylic acids and derivatives	Dicarboxylic acids and derivatives	123898-42-0	432.259	5.98768	M+CH3OH+H	C20H33NO7	0	54.7	pos
pos_495	Asp Leu	metab_4350	1.31e-05	3.46e-05	1.1367	1.1376	0.8017	-0.3188	yes	-	-	-	-	-	-	-	-	-	-	-	-	247.129	3.08888	M+H, M+Na	C10H18N2O5	89.6	0	pos
neg_2939	Isoleucyl-Phenylalanine	metab_9904	9.43e-06	2.85e-05	1.1365	1.1388	1.326	0.407	yes	-	-	-	-	-	-	-	HMDB0028914	Organic acids and derivatives	Carboxylic acids and derivatives	Amino acids, peptides, and analogues	-	323.161	5.68528	M+FA-H	C15H22N2O3	0	31.6	neg
neg_3957	Taurochenodeoxycholate-3-sulfate	metab_11027	2.36e-10	1.47e-08	1.1355	1.1352	0.8185	-0.289	yes	-	-	-	-	-	-	-	HMDB0002486;LMST05020029	Lipids and lipid-like molecules	Steroids and steroid derivatives	Bile acids, alcohols and derivatives	67030-59-5	288.619	7.5936	M-2H	C26H45NO9S2	0	86.7	neg
neg_2994	Hexythiazox	metab_9963	6.45e-08	5.7e-07	1.1348	1.1377	0.7614	-0.3934	yes	C18467	-	-	-	-	-	-	HMDB0253168	Benzenoids	Benzene and substituted derivatives	Halobenzenes	78587-05-0	397.096	5.80632	M+FA-H	C17H21ClN2O2S	0	53.2	neg
neg_5630	Glutamylleucylarginine	metab_12883	2.31e-06	9.09e-06	1.1348	1.1366	1.2953	0.3733	yes	-	-	-	-	-	-	-	HMDB0252758	Organic acids and derivatives	Carboxylic acids and derivatives	Amino acids, peptides, and analogues	-	397.223	4.8801	M-H2O-H	C17H32N6O6	0	37.1	neg
pos_6654	Phaseollin	metab_7748	2.65e-07	1.22e-06	1.1339	1.1381	0.7562	-0.4032	yes	C10515	-	-	-	-	-	-	HMDB0034411;HMDB0034173	Phenylpropanoids and polyketides	Isoflavonoids	Pyranoisoflavonoids	40323-57-7;13401-40-6	364.153	3.20938	M+ACN+H	C20H18O4	0	46.3	pos
neg_1423	4-Methyl-1,4-dihydropyridine-3,5-dicarbaldehyde	metab_8227	1.69e-07	1.18e-06	1.1338	1.1329	1.3613	0.445	yes	-	-	-	-	-	-	-	HMDB0254370	Organoheterocyclic compounds	Pyridines and derivatives	Hydropyridines	-	150.055	3.34393	M-H	C8H9NO2	0	31	neg
neg_64	MG(22:4(7Z,10Z,13Z,16Z)/0:0/0:0)	metab_13732	9.9e-05	0.0002111	1.1329	1.1236	1.3085	0.3879	yes	-	-	-	-	-	-	-	HMDB0011584	Lipids and lipid-like molecules	Glycerolipids	Monoradylglycerols	-	451.306	6.37492	M+Na-2H, M+FA-H, M-H	C25H42O4	0	75.1	neg
pos_2829	Desaminotyrosine	metab_2019	3.68e-07	1.61e-06	1.1329	1.1373	1.2619	0.3356	yes	C01744	-	-	-	-	-	-	HMDB0002199	Phenylpropanoids and polyketides	Phenylpropanoic acids	Not Available	501-97-3	184.097	4.43918	M+NH4	C9H10O3	0	56.3	pos
pos_2660	Panthenol	metab_1834	0.0002421	0.0004544	1.1322	1.1409	0.7277	-0.4586	yes	C05944	-	-	map00770	Pantothenate and CoA biosynthesis	Metabolism	Metabolism of cofactors and vitamins	HMDB0004231;HMDB0304820;MJDBOTE0000360	Organic oxygen compounds	Organooxygen compounds	Alcohols and polyols	81-13-0	247.165	4.00333	M+ACN+H	C9H19NO4	0	30.8	pos
neg_1637	Imazamox	metab_8463	0.0005535	0.0009766	1.1322	1.1279	0.7514	-0.4123	yes	C18598	-	-	-	-	-	-	HMDB0253404	Organic acids and derivatives	Carboxylic acids and derivatives	Amino acids, peptides, and analogues	114311-32-9	304.13	3.58797	M-H	C15H19N3O4	0	43.4	neg
pos_3131	Tsangane L 3-glucoside	metab_2355	0.02134	0.0269	1.1318	1.1112	1.4952	0.5804	yes	-	-	-	-	-	-	-	HMDB0040824	Lipids and lipid-like molecules	Prenol lipids	Terpene glycosides	143775-68-2	416.264	5.37043	M+ACN+H	C19H34O7	0	44.2	pos
pos_388	Asp Ile Lys	metab_3170	0.0002834	0.0005242	1.1316	1.1338	0.7769	-0.3642	yes	-	-	-	-	-	-	-	-	-	-	-	-	375.223	1.86097	M+2H, M+H	C16H30N4O6	67.6	0	pos
neg_1459	Dichloroisoproterenol	metab_8266	1.74e-05	4.8e-05	1.1308	1.1271	1.4002	0.4856	yes	C11772	-	-	map07214	beta-Adrenergic receptor agonists/antagonists	Drug Development	Target-based classification: G protein-coupled receptors	HMDB0251197	Benzenoids	Benzene and substituted derivatives	Halobenzenes	59-61-0	292.05	3.38312	M+FA-H	C11H15Cl2NO	0	46	neg
neg_7512	Arkofix	metab_14961	0.007816	0.01072	1.1305	1.1329	0.699	-0.5167	yes	-	-	-	-	-	-	-	HMDB0248602	Organoheterocyclic compounds	Azolidines	Imidazolidines	-	199.033	0.797067	M+Na-2H	C5H10N2O5	0	32	neg
pos_5532	Gly Trp Ile	metab_4990	0.03827	0.0464	1.1305	1.1142	0.6591	-0.6015	yes	-	-	-	-	-	-	-	-	-	-	-	-	375.202	5.18575	M+H	C19H26N4O4	45.5	0	pos
pos_6554	Asn Phe	metab_6120	0.001801	0.002767	1.1304	1.1293	0.7475	-0.4198	yes	-	-	-	-	-	-	-	-	-	-	-	-	280.129	3.35237	M+H	C13H17N3O4	68.9	0	pos
pos_5816	L-Hexanoylcarnitine	metab_5302	0.0001203	0.000243	1.1302	1.135	0.7323	-0.4495	yes	-	-	-	-	-	-	-	HMDB0000756	Lipids and lipid-like molecules	Fatty Acyls	Fatty acid esters	22671-29-0	260.186	4.59172	M+H	C13H25NO4	62.5	0	pos
pos_4423	LysoPE(18:1(9Z)/0:0)	metab_3771	0.0002206	0.0004184	1.1296	1.1284	0.815	-0.2952	yes	-	-	-	-	-	-	-	HMDB0011506	Lipids and lipid-like molecules	Glycerophospholipids	Glycerophosphoethanolamines	89576-29-4	480.308	6.77455	M+H	C23H46NO7P	0	60.3	pos
neg_5092	2-Aminobenzylstatine	metab_12286	0.003051	0.004534	1.1296	1.1356	1.5075	0.5922	yes	-	-	-	-	-	-	-	HMDB0245010	Organic acids and derivatives	Carboxylic acids and derivatives	Amino acids, peptides, and analogues	-	261.161	5.68528	M-H2O-H	C15H24N2O3	0	39.8	neg
pos_4361	Isolithocholic acid	metab_3702	2.8e-06	9.13e-06	1.129	1.1364	0.7718	-0.3738	yes	C17658	-	-	map00121	Secondary bile acid biosynthesis	Metabolism	Lipid metabolism	HMDB0000717;LMST04010004	Lipids and lipid-like molecules	Steroids and steroid derivatives	Bile acids, alcohols and derivatives	1534-35-6	394.331	6.8541	M+NH4	C24H40O3	0	47.5	pos
neg_1928	Leu-His-OH	metab_8786	5.65e-07	3.03e-06	1.1289	1.1328	0.7433	-0.428	yes	-	-	-	-	-	-	-	-	-	-	-	-	375.131	3.96585	M-H	C17H20N4O6	36.9	0	neg
neg_3493	Peiminine	metab_10515	1.99e-05	5.36e-05	1.1287	1.1215	0.7954	-0.3303	yes	C10808	-	-	-	-	-	-	HMDB0256206	Lipids and lipid-like molecules	Steroids and steroid derivatives	Steroidal alkaloids	61825-98-7	450.301	6.60933	M+Na-2H	C27H43NO3	0	44.3	neg
neg_2547	Mofebutazone	metab_9470	0.01254	0.01655	1.1277	1.1119	1.4236	0.5095	yes	-	-	-	-	-	-	-	HMDB0254828	Benzenoids	Benzene and substituted derivatives	Not Available	-	267.091	5.00087	M+Cl	C13H16N2O2	0	33.1	neg
neg_4381	7alpha-Hydroxy-3-oxo-4-cholestenoate	metab_11498	5.56e-07	3e-06	1.1276	1.1261	1.2584	0.3315	yes	C17337	-	-	map00120	Primary bile acid biosynthesis	Metabolism	Lipid metabolism	HMDB0012458;PW_C007985	Lipids and lipid-like molecules	Steroids and steroid derivatives	Bile acids, alcohols and derivatives	115538-85-7	429.297	6.51547	M-H	C27H42O4	0	80.3	neg
pos_3215	Perindopril	metab_2447	5.19e-06	1.56e-05	1.1275	1.1304	1.3268	0.408	yes	C07706	-	-	-	-	-	-	HMDB0014928;PW_C009254;MJDBOTE0001391	Organic acids and derivatives	Carboxylic acids and derivatives	Amino acids, peptides, and analogues	107133-36-8;82834-16-0	432.249	5.6435	M+ACN+Na	C19H32N2O5	0	38	pos
pos_688	Cincassiol B	metab_6478	0.007335	0.009991	1.1274	1.1438	0.7209	-0.4722	yes	-	-	-	-	-	-	-	HMDB0036855	Lipids and lipid-like molecules	Prenol lipids	Diterpenoids	73599-13-0	423.198	4.50322	M+H, M+Na	C20H32O8	0	36.5	pos
pos_7139	4(1H)-Pteridinone, 2-amino-7-(1,2-dihydroxypropyl)-5,6,7,8-tetrahydro-	metab_6767	8.72e-09	9.43e-08	1.1262	1.1268	1.2743	0.3497	yes	-	-	-	-	-	-	-	HMDB0249918	Organoheterocyclic compounds	Pteridines and derivatives	Pterins and derivatives	-	264.109	2.62005	M+Na	C9H15N5O3	0	48.6	pos
neg_5063	Gibberellin A24	metab_12254	2.08e-08	2.48e-07	1.1261	1.1249	1.2142	0.28	yes	C11861	-	-	map01100;map00904;map01110	Metabolic pathways;Diterpenoid biosynthesis;Biosynthesis of secondary metabolites	Metabolism;Metabolism;Metabolism	Global and overview maps;Metabolism of terpenoids and polyketides;Global and overview maps	LMPR0104170018;HMDB0303459	Lipids and lipid-like molecules	Prenol lipids	Diterpenoids	19427-32-8	383.128	5.73232	M+K-2H	C20H26O5	0	46	neg
neg_3541	Linoleic Acid	metab_10569	7.62e-05	0.0001685	1.1258	1.127	0.7808	-0.3571	yes	C01595	Lipids	Fatty acids	map01100;map00591;map01040;map01060	Metabolic pathways;Linoleic acid metabolism;Biosynthesis of unsaturated fatty acids;Biosynthesis of plant secondary metabolites	Metabolism;Metabolism;Metabolism;Metabolism	Global and overview maps;Lipid metabolism;Lipid metabolism;Chemical structure transformation maps	HMDB0006270;LMFA01030120;PW_C000530;HMDB0247706;HMDB0000673;MJDBOTE0000548	Lipids and lipid-like molecules	Fatty Acyls	Lineolic acids and derivatives	506-21-8;60-33-3	279.233	6.69538	M-H	C18H32O2	50.5	0	neg
pos_162	1-Tert-Butyl 4-ethyl 3-oxopiperidine-1,4-dicarboxylate	metab_689	0.02484	0.03096	1.1256	1.1085	1.542	0.6248	yes	-	-	-	-	-	-	-	HMDB0247311	Organoheterocyclic compounds	Piperidines	Piperidinecarboxylic acids and derivatives	-	272.149	5.33777	M+H, M+Na, M+H-H2O	C13H21NO5	0	31.9	pos
pos_2986	MURABUTIDE	metab_2192	1.69e-08	1.45e-07	1.1253	1.127	0.7746	-0.3685	yes	-	-	-	-	-	-	-	HMDB0254948	Organic acids and derivatives	Carboxylic acids and derivatives	Amino acids, peptides, and analogues	-	590.303	4.92907	M+ACN+H	C23H40N4O11	0	65.4	pos
pos_6653	Lysyl-Glycine	metab_6230	8.02e-06	2.25e-05	1.1251	1.1233	1.2711	0.346	yes	-	-	-	-	-	-	-	HMDB0304784;HMDB0028951	Organic acids and derivatives	Carboxylic acids and derivatives	Amino acids, peptides, and analogues	7563-03-03	429.246	3.20938	2M+Na	C8H17N3O3	0	46.3	pos
neg_5945	Prolyl-Tryptophan	metab_13230	8.43e-06	2.6e-05	1.1247	1.1236	0.7602	-0.3955	yes	-	-	-	-	-	-	-	HMDB0029028	Organic acids and derivatives	Carboxylic acids and derivatives	Amino acids, peptides, and analogues	-	300.135	4.39872	M-H	C16H19N3O3	0	36.9	neg
neg_1883	(S)-3-Hydroxy-N-methylcoclaurine	metab_8736	0.0003211	0.0005983	1.1242	1.1332	0.7287	-0.4567	yes	C05202	-	-	map00950;map01100;map01110;map01063	Isoquinoline alkaloid biosynthesis;Metabolic pathways;Biosynthesis of secondary metabolites;Biosynthesis of alkaloids derived from shikimate pathway	Metabolism;Metabolism;Metabolism;Metabolism	Biosynthesis of other secondary metabolites;Global and overview maps;Global and overview maps;Chemical structure transformation maps	HMDB0006921	Organoheterocyclic compounds	Isoquinolines and derivatives	Benzylisoquinolines	-	336.12	3.90323	M+Na-2H	C18H21NO4	0	45.1	neg
neg_5897	Gibberellin A44	metab_13177	2.71e-07	1.71e-06	1.124	1.1264	0.724	-0.4659	yes	C12308	-	-	-	-	-	-	HMDB0036901;LMPR0104170030	Lipids and lipid-like molecules	Prenol lipids	Diterpenoids	36434-15-8	381.145	4.46347	M+Cl	C20H26O5	0	89.3	neg
neg_7009	Dixyrazine	metab_14408	0.002981	0.004441	1.1239	1.1316	0.7327	-0.4487	yes	-	-	-	-	-	-	-	HMDB0251503	Organoheterocyclic compounds	Benzothiazines	Phenothiazines	-	448.205	3.26505	M+Na-2H	C24H33N3O2S	0	37.7	neg
pos_5857	Olamufloxacin	metab_5347	0.0001647	0.0003216	1.1234	1.1223	0.7825	-0.3539	yes	-	-	-	-	-	-	-	HMDB0255928	Organoheterocyclic compounds	Quinolines and derivatives	Quinoline carboxylic acids	-	790.383	4.50322	2M+NH4	C20H23FN4O3	0	59.1	pos
pos_5658	Coumaryl acetate	metab_5127	2.02e-07	9.83e-07	1.1229	1.1268	1.2253	0.2931	yes	C20465	-	-	map00940	Phenylpropanoid biosynthesis	Metabolism	Biosynthesis of other secondary metabolites	HMDB0304297	Benzenoids	Benzene and substituted derivatives	Styrenes	-	210.112	4.92907	M+NH4	C11H12O3	0	51.9	pos
pos_5041	Tauro-alpha-muricholic acid	metab_4451	0.001313	0.00207	1.1228	1.1077	0.808	-0.3075	yes	-	-	-	-	-	-	-	HMDB0000932;HMDB0258742	Lipids and lipid-like molecules	Steroids and steroid derivatives	Bile acids, alcohols and derivatives	25696-60-0	538.281	6.02748	M+Na	C26H45NO7S	0	48.8	pos
neg_4195	Sorbitan palmitate	metab_11292	0.000819	0.001386	1.1226	1.1291	0.8036	-0.3154	yes	-	-	-	-	-	-	-	HMDB0029887;LMFA07011019	Lipids and lipid-like molecules	Fatty Acyls	Fatty acid esters	26266-57-9	437.267	6.85155	M+Cl	C22H42O6	0	60.6	neg
pos_4877	Docosahexaenoic acid	metab_4269	0.0001221	0.000246	1.1226	1.1152	0.7684	-0.38	yes	C06429	Lipids	Fatty acids	map01040	Biosynthesis of unsaturated fatty acids	Metabolism	Lipid metabolism	HMDB0002183;PW_C001472;LMFA01031176;LMFA01030185	Lipids and lipid-like molecules	Fatty Acyls	Fatty acids and conjugates	6217-54-5	293.226	6.155	M+H-2H2O	C22H32O2	0	58.6	pos
pos_4845	9,12,13-TriHOME	metab_4234	0.000753	0.001255	1.1225	1.1148	1.2399	0.3103	yes	C14833	-	-	map00591	Linoleic acid metabolism	Metabolism	Lipid metabolism	HMDB0004708;LMFA02000014	Lipids and lipid-like molecules	Fatty Acyls	Fatty acids and conjugates	-	295.226	6.2027	M+H-2H2O	C18H34O5	0	52.3	pos
pos_5449	Morphine	metab_4900	4.04e-07	1.75e-06	1.1224	1.1198	1.2084	0.273	yes	C01516	-	-	map01100;map01110;map00982;map00950;map04080;map01063	Metabolic pathways;Biosynthesis of secondary metabolites;Drug metabolism - cytochrome P450;Isoquinoline alkaloid biosynthesis;Neuroactive ligand-receptor interaction;Biosynthesis of alkaloids derived from shikimate pathway	Metabolism;Metabolism;Metabolism;Metabolism;Environmental Information Processing;Metabolism	Global and overview maps;Global and overview maps;Xenobiotics biodegradation and metabolism;Biosynthesis of other secondary metabolites;Signaling molecules and interaction;Chemical structure transformation maps	PW_C008829;HMDB0014440	Alkaloids and derivatives	Morphinans	Not Available	57-27-2	303.17	5.34577	M+NH4	C17H19NO3	0	34.6	pos
neg_2653	3-Hydroxysebacic Acid	metab_9588	3.71e-06	1.33e-05	1.122	1.1159	1.3004	0.379	yes	-	-	-	-	-	-	-	HMDB0000350	Organic acids and derivatives	Hydroxy acids and derivatives	Medium-chain hydroxy acids and derivatives	446881-43-2	217.108	5.18383	M-H	C10H18O5	44.8	0	neg
pos_6044	Homo-L-arginine	metab_5556	0.0002407	0.0004523	1.1215	1.122	0.8054	-0.3122	yes	C01924	-	-	-	-	-	-	HMDB0000670	Organic acids and derivatives	Carboxylic acids and derivatives	Amino acids, peptides, and analogues	156-86-5	415.218	4.14067	2M+K	C7H16N4O2	0	58.3	pos
pos_1687	Ala Leu Lys	metab_762	0.002727	0.004049	1.1208	1.1251	0.7548	-0.4057	yes	-	-	-	-	-	-	-	-	-	-	-	-	331.234	1.60557	M+2H, M+H	C15H30N4O4	31.3	0	pos
pos_6983	Val Glu Asn	metab_6593	0.0002202	0.0004178	1.1204	1.1246	0.7898	-0.3404	yes	-	-	-	-	-	-	-	-	-	-	-	-	361.172	2.79575	M+H	C14H24N4O7	37.5	0	pos
pos_580	5'-N-Methylcarboxamidoadenosine	metab_5284	7.1e-07	2.81e-06	1.1197	1.1144	1.2501	0.3221	yes	-	-	-	-	-	-	-	HMDB0246883	Nucleosides, nucleotides, and analogues	Purine nucleosides	Not Available	-	295.115	3.6092	M+H, M+CH3OH+H	C11H14N6O4	0	45.3	pos
neg_5475	Xi-3-Methyl-3-cyclohexen-1-ol	metab_12710	1.18e-06	5.38e-06	1.1194	1.1149	1.3755	0.46	yes	-	-	-	-	-	-	-	HMDB0034372	Organic oxygen compounds	Organooxygen compounds	Alcohols and polyols	-	157.086	5.11715	M+FA-H	C7H12O	0	36.7	neg
pos_860	Isosafrole	metab_7729	3.04e-07	1.37e-06	1.1193	1.1181	1.2175	0.2839	yes	C10472	-	-	-	-	-	-	HMDB0253689;HMDB0033591	Organoheterocyclic compounds	Benzodioxoles	Not Available	120-58-1;94-59-7	180.102	6.09132	M+H, M+NH4	C10H10O2	36.6	0	pos
pos_5404	2-(2-Hydroxyethyl)phenyl hydrogen sulfate	metab_4851	6.54e-12	7.87e-10	1.1188	1.1184	1.3614	0.4451	yes	-	-	-	-	-	-	-	HMDB0304908	Organic acids and derivatives	Organic sulfuric acids and derivatives	Arylsulfates	-	260.058	5.44247	M+ACN+H	C8H10O5S	0	62	pos
pos_7136	1-Methylcytosine	metab_6764	8.44e-08	4.88e-07	1.1176	1.118	1.276	0.3516	yes	-	-	-	-	-	-	-	HMDB0243939	Organoheterocyclic compounds	Diazines	Pyrimidines and pyrimidine derivatives	-	126.066	2.636	M+H	C5H7N3O	0	30.1	pos
neg_3502	N-Stearoyl Threonine	metab_10526	1.35e-05	3.86e-05	1.1176	1.1145	0.7653	-0.3859	yes	-	-	-	-	-	-	-	HMDB0241950	Organic acids and derivatives	Carboxylic acids and derivatives	Amino acids, peptides, and analogues	-	366.301	6.6328	M-H2O-H	C22H43NO4	0	50.8	neg
neg_6497	Fluticasone 17beta-carboxylic acid	metab_13839	1.03e-07	8.11e-07	1.1175	1.1205	0.7737	-0.3702	yes	-	-	-	-	-	-	-	HMDB0061092	Lipids and lipid-like molecules	Steroids and steroid derivatives	Androstane steroids	-	837.349	3.75317	2M+FA-H	C21H26F2O5	0	58.5	neg
pos_3253	9-(4-Fluoro-3-(hydroxymethyl)butyl)guanine	metab_2488	0.0001212	0.0002443	1.1164	1.118	0.7642	-0.3881	yes	-	-	-	-	-	-	-	HMDB0245591	Organoheterocyclic compounds	Imidazopyrimidines	Purines and purine derivatives	-	319.129	5.76348	M+ACN+Na	C10H14FN5O2	0	34.1	pos
pos_824	Lucidenic acid K	metab_7502	1.39e-07	7.32e-07	1.1163	1.118	0.7675	-0.3817	yes	-	-	-	-	-	-	-	HMDB0035890	Lipids and lipid-like molecules	Prenol lipids	Triterpenoids	-	986.535	5.8998	M+H, 2M+ACN+H	C27H36O7	0	74	pos
pos_6070	Castanospermine	metab_5585	4.53e-05	0.000102	1.1141	1.1155	0.7904	-0.3393	yes	C02256	-	-	-	-	-	-	HMDB0249700	Organoheterocyclic compounds	Indolizidines	Not Available	79831-76-8	379.207	4.1006	2M+H	C8H15NO4	0	40.2	pos
neg_1660	Cyclo(D-trp-D-asp-pro-D-val-leu)	metab_8489	8.91e-08	7.22e-07	1.1137	1.1164	0.7879	-0.3439	yes	-	-	-	-	-	-	-	HMDB0249361	Organic acids and derivatives	Carboxylic acids and derivatives	Amino acids, peptides, and analogues	-	609.3	3.61147	M-H	C31H42N6O7	0	67	neg
neg_6747	EPIISOPILOTURINE	metab_14117	0.002811	0.004211	1.1132	1.1034	1.3842	0.469	yes	-	-	-	-	-	-	-	HMDB0251850	Organoheterocyclic compounds	Azoles	Imidazoles	-	323.08	3.50128	M+K-2H	C16H18N2O3	0	38.5	neg
pos_2770	Minoxidil Glucuronide	metab_1955	3.6e-06	1.14e-05	1.1132	1.112	1.3477	0.4305	yes	-	-	-	-	-	-	-	HMDB0254740	Organic oxygen compounds	Organooxygen compounds	Carbohydrates and carbohydrate conjugates	-	350.146	4.29402	M+H-2H2O	C15H23N5O7	0	68	pos
neg_2360	Adomeglivant	metab_9265	3.14e-07	1.92e-06	1.1122	1.1148	0.7406	-0.4331	yes	-	-	-	-	-	-	-	HMDB0248020	Benzenoids	Benzene and substituted derivatives	Biphenyls and derivatives	-	576.234	4.63315	M+Na-2H	C32H36F3NO4	0	40.3	neg
pos_5127	Tomentosic acid	metab_4545	3e-05	7.08e-05	1.112	1.1211	0.7836	-0.3518	yes	-	-	-	-	-	-	-	HMDB0034501	Lipids and lipid-like molecules	Prenol lipids	Triterpenoids	6753-23-7	549.321	5.94782	M+2Na-H	C30H48O6	0	40.3	pos
neg_3531	1-Stearoylglycerophosphoglycerol	metab_10558	3.06e-08	3.29e-07	1.1117	1.1137	0.7907	-0.3389	yes	-	-	-	-	-	-	-	HMDB0061697	Lipids and lipid-like molecules	Glycerophospholipids	Glycerophosphoglycerols	-	533.288	6.67973	M+Na-2H	C24H49O9P	0	69.6	neg
pos_4750	Deoxyspergualin	metab_4130	0.01506	0.01949	1.1109	1.0981	0.731	-0.452	yes	-	-	-	-	-	-	-	HMDB0243514	Organic acids and derivatives	Carboxylic acids and derivatives	Amino acids, peptides, and analogues	-	370.295	6.28965	M+H-H2O	C17H37N7O3	0	69.3	pos
neg_2856	6-Hydroxy-8-methyl-8-azabicyclo[3.2.1]octan-3-yl 3-hydroxy-2-phenylpropanoate	metab_9812	0.001788	0.002788	1.1107	1.1006	0.703	-0.5085	yes	-	-	-	-	-	-	-	HMDB0244793	Alkaloids and derivatives	Tropane alkaloids	Not Available	-	350.161	5.51822	M+FA-H	C17H23NO4	0	34.9	neg
pos_7107	Val Val Asn	metab_6732	9.64e-05	0.0002001	1.1105	1.1188	0.7727	-0.372	yes	-	-	-	-	-	-	-	-	-	-	-	-	331.197	2.68427	M+H	C14H26N4O5	44.6	0	pos
neg_3144	BUTHIDAZOLE	metab_10130	0.0021	0.003225	1.1101	1.1011	0.7626	-0.391	yes	C19112	-	-	-	-	-	-	HMDB0249461	Organoheterocyclic compounds	Azoles	Thiadiazoles	55511-98-3	293.049	5.9627	M+K-2H	C10H16N4O2S	0	58.9	neg
neg_2308	Fumigaclavine A	metab_9207	8.41e-05	0.0001832	1.1101	1.102	1.254	0.3265	yes	C20436	-	-	map01110;map00901	Biosynthesis of secondary metabolites;Indole alkaloid biosynthesis	Metabolism;Metabolism	Global and overview maps;Biosynthesis of other secondary metabolites	HMDB0030202	Alkaloids and derivatives	Ergoline and derivatives	Clavines and derivatives	6879-59-0	335.117	4.54393	M+K-2H	C18H22N2O2	0	39	neg
pos_6534	12'-Apo-b-carotene-3,12'-diol	metab_6098	1.5e-11	1.41e-09	1.11	1.1101	0.8094	-0.3051	yes	-	-	-	-	-	-	-	HMDB0036054	Lipids and lipid-like molecules	Prenol lipids	Diterpenoids	120021-87-6	413.239	3.3762	M+2Na-H	C25H36O2	0	35.1	pos
neg_2175	16alpha-hydroxyprednisolone	metab_9060	4.27e-07	2.44e-06	1.1099	1.1117	0.7365	-0.4413	yes	-	-	-	-	-	-	-	HMDB0244573	Lipids and lipid-like molecules	Steroids and steroid derivatives	Hydroxysteroids	-	421.183	4.32042	M+FA-H	C21H28O6	0	76.4	neg
neg_3343	Torvoside G	metab_10350	0.001154	0.001882	1.1098	1.1164	0.7657	-0.3852	yes	-	-	-	-	-	-	-	HMDB0030337	Lipids and lipid-like molecules	Glycerolipids	Triradylcglycerols	184777-22-8	653.391	6.3358	M+FA-H	C34H56O9	0	39	neg
neg_3360	3'-Hydroxystanozolol	metab_10369	0.0002555	0.0004884	1.1089	1.1036	1.2385	0.3085	yes	-	-	-	-	-	-	-	HMDB0006001	Lipids and lipid-like molecules	Steroids and steroid derivatives	Estrane steroids	125709-39-9	379.216	6.37492	M+Cl	C21H32N2O2	0	40	neg
neg_7098	Leucyl-Lysine	metab_14506	0.001942	0.003003	1.1085	1.1107	0.7078	-0.4986	yes	-	-	-	-	-	-	-	HMDB0028934	Organic acids and derivatives	Carboxylic acids and derivatives	Amino acids, peptides, and analogues	-	258.182	3.18613	M-H	C12H25N3O3	0	35.2	neg
pos_845	2-Methoxyestriol	metab_7525	0.0002853	0.000527	1.1081	1.0978	1.2572	0.3302	yes	-	-	-	-	-	-	-	HMDB0245202	Lipids and lipid-like molecules	Steroids and steroid derivatives	Estrane steroids	-	351.216	6.02748	M+H-H2O, M+CH3OH+H	C19H26O4	0	35.3	pos
neg_1467	Ala Val Asp Asp	metab_8275	1.15e-07	8.87e-07	1.1078	1.1103	0.768	-0.3807	yes	-	-	-	-	-	-	-	-	-	-	-	-	417.163	3.39097	M-H	C16H26N4O9	60	0	neg
pos_6814	Isopentyl gentiobioside	metab_6407	0.0001128	0.0002295	1.1077	1.1095	0.7894	-0.3412	yes	-	-	-	-	-	-	-	HMDB0041512	Lipids and lipid-like molecules	Fatty Acyls	Fatty acyl glycosides	178275-89-3	445.229	2.99335	M+CH3OH+H	C17H32O11	0	38.1	pos
neg_1418	Naloxone	metab_8221	0.01531	0.01991	1.107	1.1237	0.6718	-0.5739	yes	C07252	-	-	-	-	-	-	HMDB0015314;PW_C009596	Benzenoids	Phenanthrenes and derivatives	Not Available	465-65-6	348.123	3.33547	M+Na-2H	C19H21NO4	0	40.1	neg
pos_5145	Cyclohexa-2,4-dienylmethanol	metab_4565	0.0003809	0.0006826	1.1069	1.0982	1.3651	0.449	yes	-	-	-	-	-	-	-	HMDB0250648	Organic oxygen compounds	Organooxygen compounds	Alcohols and polyols	-	111.081	5.9398	M+H	C7H10O	0	40.7	pos
neg_5866	Prephenate	metab_13143	2.48e-11	3.19e-09	1.1068	1.1069	1.2989	0.3773	yes	C00254	-	-	map01100;map01110;map01240;map00998;map01230;map00400;map00401;map01063;map01061;map01060	Metabolic pathways;Biosynthesis of secondary metabolites;Biosynthesis of cofactors;Biosynthesis of various secondary metabolites - part 2;Biosynthesis of amino acids;Phenylalanine, tyrosine and tryptophan biosynthesis;Novobiocin biosynthesis;Biosynthesis of alkaloids derived from shikimate pathway;Biosynthesis of phenylpropanoids;Biosynthesis of plant secondary metabolites	Metabolism;Metabolism;Metabolism;Metabolism;Metabolism;Metabolism;Metabolism;Metabolism;Metabolism;Metabolism	Global and overview maps;Global and overview maps;Global and overview maps;Biosynthesis of other secondary metabolites;Global and overview maps;Amino acid metabolism;Biosynthesis of other secondary metabolites;Chemical structure transformation maps;Chemical structure transformation maps;Chemical structure transformation maps	HMDB0012283	Organic acids and derivatives	Keto acids and derivatives	Gamma-keto acids and derivatives	87664-40-2;126-49-8	271.047	4.5145	M+FA-H	C10H10O6	0	30.9	neg
pos_2389	6-Lactoyltetrahydropterin	metab_1534	0.0008199	0.001355	1.1065	1.1035	0.7854	-0.3484	yes	C04244	-	-	map01100;map00790	Metabolic pathways;Folate biosynthesis	Metabolism;Metabolism	Global and overview maps;Metabolism of cofactors and vitamins	PW_C001388;HMDB0002065	Organoheterocyclic compounds	Pteridines and derivatives	Pterins and derivatives	33405-80-0	479.214	3.36037	2M+H	C9H13N5O3	0	30.3	pos
pos_3488	Cyperolone	metab_2744	6.48e-10	1.64e-08	1.1064	1.1074	1.2238	0.2914	yes	C16946	-	-	-	-	-	-	HMDB0036680	Organic oxygen compounds	Organooxygen compounds	Alcohols and polyols	13741-46-3	259.169	6.25773	M+Na	C15H24O2	0	70.4	pos
pos_5243	17alpha-Methylestradiol	metab_4673	6.1e-07	2.46e-06	1.106	1.1094	1.3082	0.3876	yes	C14483	-	-	-	-	-	-	HMDB0244778	Lipids and lipid-like molecules	Steroids and steroid derivatives	Estrane steroids	302-76-1	309.18	5.78803	M+Na	C19H26O2	0	31.7	pos
neg_4079	DG(18:0/20:5(5Z,8Z,11Z,14Z,17Z)/0:0)	metab_11163	8.88e-08	7.22e-07	1.106	1.1089	0.7875	-0.3446	yes	C00165	-	-	map05214;map05167;map04650;map05163;map04750;map05235;map04015;map04014;map04659;map04540;map04010;map04012;map05022;map04370;map04371;map04072;map04071;map04975;map05143;map05012;map05231;map05146;map04919;map05200;map04961;map04745;map04921;map04920;map04923;map04925;map05017;map04625;map04929;map04726;map04725;map04724;map04723;map04722;map05223;map04720;map04666;map05170;map04664;map04658;map…	Glioma;Kaposi sarcoma-associated herpesvirus infection;Natural killer cell mediated cytotoxicity;Human cytomegalovirus infection;Inflammatory mediator regulation of TRP channels;PD-L1 expression and PD-1 checkpoint pathway in cancer;Rap1 signaling pathway;Ras signaling pathway;Th17 cell differentiation;Gap junction;MAPK signaling pathway;ErbB signaling pathway;Pathways of neurodegeneration - mult…	Human Diseases;Human Diseases;Organismal Systems;Human Diseases;Organismal Systems;Human Diseases;Environmental Information Processing;Environmental Information Processing;Organismal Systems;Cellular Processes;Environmental Information Processing;Environmental Information Processing;Human Diseases;Environmental Information Processing;Environmental Information Processing;Environmental Information …	Cancer: specific types;Infectious disease: viral;Immune system;Infectious disease: viral;Sensory system;Cancer: overview;Signal transduction;Signal transduction;Immune system;Cellular community - eukaryotes;Signal transduction;Signal transduction;Neurodegenerative disease;Signal transduction;Signal transduction;Signal transduction;Signal transduction;Digestive system;Infectious disease: parasitic…	HMDB0007172;PW_C003223	Lipids and lipid-like molecules	Glycerolipids	Diradylglycerols	-	623.501	7.4289	M-H2O-H	C41H70O5	0	43.9	neg
pos_5472	Goshonoside F3	metab_4924	2.43e-05	5.88e-05	1.1059	1.1042	1.2746	0.35	yes	-	-	-	-	-	-	-	HMDB0038376	Lipids and lipid-like molecules	Prenol lipids	Terpene glycosides	90851-26-6	609.328	5.29777	M+H-2H2O	C32H52O13	0	74.7	pos
pos_7178	Ala Ile His	metab_6810	0.0001207	0.0002435	1.1059	1.1075	0.7846	-0.35	yes	-	-	-	-	-	-	-	-	-	-	-	-	340.198	2.54032	M+H	C15H25N5O4	78.2	0	pos
pos_777	Chitobiose	metab_7449	6.04e-06	1.76e-05	1.1058	1.1077	0.7948	-0.3313	yes	C01674	-	-	map01100;map00520;map02060;map02010	Metabolic pathways;Amino sugar and nucleotide sugar metabolism;Phosphotransferase system (PTS);ABC transporters	Metabolism;Metabolism;Environmental Information Processing;Environmental Information Processing	Global and overview maps;Carbohydrate metabolism;Membrane transport;Membrane transport	PW_C001925;HMDB0062702;HMDB0003556	Organic oxygen compounds	Organooxygen compounds	Carbohydrates and carbohydrate conjugates	35061-50-8;577-76-4	444.186	5.43447	M+NH4, M+Na	C15H26N2O12	0	66.5	pos
pos_6097	N-Acetyl-D-tryptophan	metab_5614	1.37e-09	2.63e-08	1.1057	1.104	1.2351	0.3047	yes	C03137	-	-	-	-	-	-	HMDB0255052	Organic acids and derivatives	Carboxylic acids and derivatives	Amino acids, peptides, and analogues	2280-01-05	229.097	4.05197	M+H-H2O	C13H14N2O3	0	68.5	pos
neg_1632	Pentopril	metab_8458	0.0001114	0.0002334	1.1052	1.1118	0.7597	-0.3966	yes	-	-	-	-	-	-	-	HMDB0256290	Organoheterocyclic compounds	Indoles and derivatives	Indolecarboxylic acids and derivatives	-	354.131	3.58013	M+Na-2H	C18H23NO5	0	55.8	neg
pos_2938	Isoforskolin	metab_2139	0.0005475	0.0009369	1.105	1.1144	0.7533	-0.4086	yes	-	-	-	-	-	-	-	HMDB0253641	Lipids and lipid-like molecules	Prenol lipids	Triterpenoids	-	393.223	4.78507	M+H-H2O	C22H34O7	0	52.8	pos
pos_3773	DG(PGE1/0:0/18:0)	metab_3053	4.02e-07	1.74e-06	1.1048	1.1039	1.237	0.3068	yes	-	-	-	-	-	-	-	HMDB0296002	Not Available	Not Available	Not Available	-	659.52	7.30698	M+H-2H2O	C41H74O8	0	54.7	pos
pos_1238	9,10,13-Trihydroxystearic acid	metab_265	0.002148	0.003258	1.1047	1.0969	1.3003	0.3788	yes	-	-	-	-	-	-	-	HMDB0030935	Lipids and lipid-like molecules	Fatty Acyls	Fatty acids and conjugates	50439-74-2	297.242	6.24203	M+H-2H2O, M+H	C18H36O5	0	32.7	pos
pos_5881	(4Z,6Z)-Octa-4,6-dienoylcarnitine	metab_5374	0.0002046	0.0003913	1.1038	1.0945	1.3413	0.4236	yes	-	-	-	-	-	-	-	HMDB0241719	Lipids and lipid-like molecules	Fatty Acyls	Fatty acid esters	-	316.212	4.4632	M+CH3OH+H	C15H25NO4	0	37.6	pos
pos_7123	Ile Gly	metab_6750	4.04e-06	1.26e-05	1.1036	1.1068	0.8266	-0.2748	yes	-	-	-	-	-	-	-	-	-	-	-	-	189.123	2.66798	M+H	C8H16N2O3	64	0	pos
neg_5073	Chenodeoxycholylmethionine	metab_12265	5.71e-07	3.05e-06	1.1035	1.099	0.7688	-0.3793	yes	-	-	-	-	-	-	-	HMDB0242403	Lipids and lipid-like molecules	Steroids and steroid derivatives	Bile acids, alcohols and derivatives	-	568.335	5.7088	M+FA-H	C29H49NO5S	0	67.8	neg
neg_2449	2-(4-Methyl-5-thiazolyl)ethyl octanoate	metab_9361	3.69e-05	9.07e-05	1.1032	1.1037	0.7789	-0.3605	yes	-	-	-	-	-	-	-	HMDB0032423	Organoheterocyclic compounds	Azoles	Thiazoles	163266-17-9	304.115	4.81932	M+Cl	C14H23NO2S	0	44.8	neg
pos_6928	Aspartame	metab_6532	1.17e-05	3.12e-05	1.1031	1.1032	0.8236	-0.28	yes	C11045	-	-	map04742	Taste transduction	Organismal Systems	Sensory system	HMDB0001894;MJDBOTE0001640	Organic acids and derivatives	Carboxylic acids and derivatives	Amino acids, peptides, and analogues	22839-47-0	295.129	2.85002	M+H	C14H18N2O5	61.5	0	pos
neg_1878	DHAP(18:0)	metab_8730	2.78e-05	7.12e-05	1.1023	1.1005	0.7696	-0.3778	yes	C03805	-	-	-	-	-	-	HMDB0011133;PW_C006772	Organic oxygen compounds	Organooxygen compounds	Carbonyl compounds	-	457.23	3.8954	M+Na-2H	C21H41O7P	0	36.4	neg
neg_1378	N-hydroxyl-tryptamine	metab_8176	6.9e-05	0.0001542	1.1022	1.1027	0.7524	-0.4104	yes	C17203	-	-	map01100;map00380	Metabolic pathways;Tryptophan metabolism	Metabolism;Metabolism	Global and overview maps;Amino acid metabolism	HMDB0255154	Organoheterocyclic compounds	Indoles and derivatives	Indoles	-	221.093	3.29633	M+FA-H	C10H12N2O	0	30.9	neg
neg_2424	Vephylline	metab_9334	1.4e-07	1.03e-06	1.1017	1.1043	0.7832	-0.3526	yes	-	-	-	-	-	-	-	HMDB0247220	Organoheterocyclic compounds	Imidazopyrimidines	Purines and purine derivatives	-	681.336	4.76547	2M+Hac-H	C13H21N5O4	0	55.3	neg
pos_1885	N2-Acetyl-L-ornithine	metab_979	2.76e-06	9.02e-06	1.1015	1.1063	0.8135	-0.2979	yes	C00437	-	-	map01100;map01210;map00220;map01110;map01230	Metabolic pathways;2-Oxocarboxylic acid metabolism;Arginine biosynthesis;Biosynthesis of secondary metabolites;Biosynthesis of amino acids	Metabolism;Metabolism;Metabolism;Metabolism;Metabolism	Global and overview maps;Global and overview maps;Amino acid metabolism;Global and overview maps;Global and overview maps	HMDB0003357	Organic acids and derivatives	Carboxylic acids and derivatives	Amino acids, peptides, and analogues	6205-08-09	175.108	1.49378	M+H	C7H14N2O3	33.4	0	pos
neg_5950	Gibberellin A29	metab_13236	3.99e-08	3.99e-07	1.1015	1.098	1.259	0.3322	yes	C06096	-	-	map00904	Diterpenoid biosynthesis	Metabolism	Metabolism of terpenoids and polyketides	LMPR0104170036;HMDB0303458	Lipids and lipid-like molecules	Fatty Acyls	Fatty alcohol esters	-	385.107	4.39088	M+K-2H	C19H24O6	0	36.9	neg
neg_5875	Mifepristone	metab_13153	2.14e-07	1.42e-06	1.1013	1.104	0.7612	-0.3937	yes	C07652	-	-	-	-	-	-	HMDB0014972;MJDBOTE0001512	Lipids and lipid-like molecules	Steroids and steroid derivatives	Oxosteroids	84371-65-3	464.236	4.50172	M+Cl	C29H35NO2	0	59.9	neg
pos_3100	5-HEPE	metab_2321	6.71e-06	1.93e-05	1.1013	1.1	1.2689	0.3435	yes	-	-	-	-	-	-	-	HMDB0005081	Lipids and lipid-like molecules	Fatty Acyls	Eicosanoids	92008-51-0	382.233	5.28178	M+ACN+Na	C20H30O3	0	31.5	pos
pos_1458	Asn Ile Val	metab_509	3.05e-05	7.17e-05	1.101	1.0968	0.8012	-0.3197	yes	-	-	-	-	-	-	-	-	-	-	-	-	345.213	3.63312	M+H, M+2Na-H	C15H28N4O5	55.3	0	pos
pos_6433	Epidermin	metab_5988	4.47e-05	0.000101	1.1007	1.1082	0.7721	-0.3731	yes	-	-	-	-	-	-	-	HMDB0034777	Organic oxygen compounds	Organooxygen compounds	Carbohydrates and carbohydrate conjugates	126050-09-7	325.139	3.52862	M+ACN+Na	C11H19NO6	0	33.5	pos
pos_2267	Trans-3-hydroxy-L-proline	metab_1400	1.11e-05	2.97e-05	1.1007	1.1034	0.8069	-0.3095	yes	C05147	-	-	map00330	Arginine and proline metabolism	Metabolism	Amino acid metabolism	HMDB0059659	Organic acids and derivatives	Carboxylic acids and derivatives	Amino acids, peptides, and analogues	-	304.15	3.08888	2M+ACN+H	C5H9NO3	0	36.3	pos
neg_1450	Arginyltryptophan	metab_8257	0.0001995	0.0003902	1.1006	1.1008	0.7467	-0.4214	yes	-	-	-	-	-	-	-	HMDB0028720	Organic acids and derivatives	Carboxylic acids and derivatives	Amino acids, peptides, and analogues	25615-38-7	381.163	3.36742	M+Na-2H	C17H24N6O3	0	37	neg
pos_5500	Desacetyllevonantradol	metab_4955	4.8e-06	1.46e-05	1.1004	1.101	1.2971	0.3753	yes	-	-	-	-	-	-	-	HMDB0251028	Organoheterocyclic compounds	Quinolines and derivatives	Benzoquinolines	-	418.233	5.24977	M+Na	C25H33NO3	0	44.2	pos
pos_3737	DG(9D5/9D3/0:0)	metab_3014	1.69e-07	8.6e-07	1.1003	1.0984	1.2242	0.2918	yes	C00165	-	-	map05214;map05167;map04650;map05163;map04750;map05235;map04015;map04014;map04659;map04540;map04010;map04012;map05022;map04370;map04371;map04072;map04071;map04975;map05143;map05012;map05231;map05146;map04919;map05200;map04961;map04745;map04921;map04920;map04923;map04925;map05017;map04625;map04929;map04726;map04725;map04724;map04723;map04722;map05223;map04720;map04666;map05170;map04664;map04658;map…	Glioma;Kaposi sarcoma-associated herpesvirus infection;Natural killer cell mediated cytotoxicity;Human cytomegalovirus infection;Inflammatory mediator regulation of TRP channels;PD-L1 expression and PD-1 checkpoint pathway in cancer;Rap1 signaling pathway;Ras signaling pathway;Th17 cell differentiation;Gap junction;MAPK signaling pathway;ErbB signaling pathway;Pathways of neurodegeneration - mult…	Human Diseases;Human Diseases;Organismal Systems;Human Diseases;Organismal Systems;Human Diseases;Environmental Information Processing;Environmental Information Processing;Organismal Systems;Cellular Processes;Environmental Information Processing;Environmental Information Processing;Human Diseases;Environmental Information Processing;Environmental Information Processing;Environmental Information …	Cancer: specific types;Infectious disease: viral;Immune system;Infectious disease: viral;Sensory system;Cancer: overview;Signal transduction;Signal transduction;Immune system;Cellular community - eukaryotes;Signal transduction;Signal transduction;Neurodegenerative disease;Signal transduction;Signal transduction;Signal transduction;Signal transduction;Digestive system;Infectious disease: parasitic…	PW_C063676;HMDB0116437	Lipids and lipid-like molecules	Fatty Acyls	Fatty acids and conjugates	-	655.49	7.16392	M+H-H2O	C41H68O7	0	37.1	pos
neg_4070	Ergocornine	metab_11154	1.17e-07	9.01e-07	1.1003	1.1035	0.8118	-0.3008	yes	C09162	-	-	-	-	-	-	HMDB0251906	Alkaloids and derivatives	Ergoline and derivatives	Lysergic acids and derivatives	564-36-3	582.272	7.45235	M+Na-2H	C31H39N5O5	0	70.3	neg
pos_3074	Asperagenin	metab_2291	1.02e-05	2.79e-05	1.1002	1.0985	1.2909	0.3683	yes	-	-	-	-	-	-	-	HMDB0034293	Lipids and lipid-like molecules	Prenol lipids	Triterpenoids	17305-15-6	449.326	5.19377	M+H	C27H44O5	0	57.9	pos
pos_2645	S-(2-Carboxyethyl)-L-cysteine	metab_1817	9.54e-09	9.97e-08	1.1	1.1021	0.7044	-0.5055	yes	-	-	-	-	-	-	-	HMDB0246645	Organic acids and derivatives	Carboxylic acids and derivatives	Amino acids, peptides, and analogues	-	176.038	3.97132	M+H-H2O	C6H11NO4S	0	54.1	pos
pos_3013	Crispolide	metab_2224	1.1e-06	4.05e-06	1.0999	1.098	0.7702	-0.3766	yes	-	-	-	-	-	-	-	HMDB0036695	Lipids and lipid-like molecules	Prenol lipids	Terpene lactones	83217-86-1	322.165	5.00175	M+ACN+H	C15H20O5	0	62	pos
pos_3294	Ortho-Hydroxyphenylacetic acid	metab_2532	5.8e-08	3.64e-07	1.0997	1.0971	1.2642	0.3383	yes	C05852	-	-	map01100;map00360;map01120;map00643	Metabolic pathways;Phenylalanine metabolism;Microbial metabolism in diverse environments;Styrene degradation	Metabolism;Metabolism;Metabolism;Metabolism	Global and overview maps;Amino acid metabolism;Global and overview maps;Xenobiotics biodegradation and metabolism	HMDB0000669	Benzenoids	Benzene and substituted derivatives	Phenylacetic acids	614-75-5	194.081	5.8838	M+ACN+H	C8H8O3	0	48.6	pos
neg_1629	8-Methoxykynurenate	metab_8454	0.000147	0.0002987	1.0992	1.0936	1.3154	0.3955	yes	C05830	-	-	map00380	Tryptophan metabolism	Metabolism	Amino acid metabolism	HMDB0060426	Organoheterocyclic compounds	Quinolines and derivatives	Quinoline carboxylic acids	2929-14-8	264.051	3.58013	M+FA-H	C11H9NO4	0	70.2	neg
neg_281	Dibutyl sulfosuccinate	metab_9761	0.003929	0.005697	1.0987	1.0853	1.275	0.3506	yes	-	-	-	-	-	-	-	HMDB0242124	Lipids and lipid-like molecules	Fatty Acyls	Fatty acid esters	-	309.101	4.6258	M-H, M+Na-2H	C12H22O7S	0	35.9	neg
neg_2141	Indole carboxylic acid sulfate	metab_9023	1.06e-07	8.26e-07	1.0983	1.1012	0.7757	-0.3665	yes	-	-	-	-	-	-	-	HMDB0304912	Not Available	Not Available	Not Available	-	239.997	4.25702	M-H	C9H7NO5S	0	39.1	neg
neg_1005	L-2-Amino-3-(1-pyrazolyl)propanoic acid	metab_7764	2.04e-05	5.49e-05	1.098	1.096	0.8132	-0.2983	yes	-	-	-	-	-	-	-	HMDB0034267	Organic acids and derivatives	Carboxylic acids and derivatives	Amino acids, peptides, and analogues	2734-48-7	154.061	0.852167	M-H	C6H9N3O2	0	66.2	neg
[truncated: 235 more rows]
