# Supplementary material for: The microbiome- and metabolome-modulating activity of dietary cholesterol: insights from the small and large intestines
Source: Royal Society of Chemistry journal article supplement (doi:10.1039/d4fo03049d), 2025-01-01
Supplement: d4fo03049d10.pdf [file d4fo03049d10.pdf]

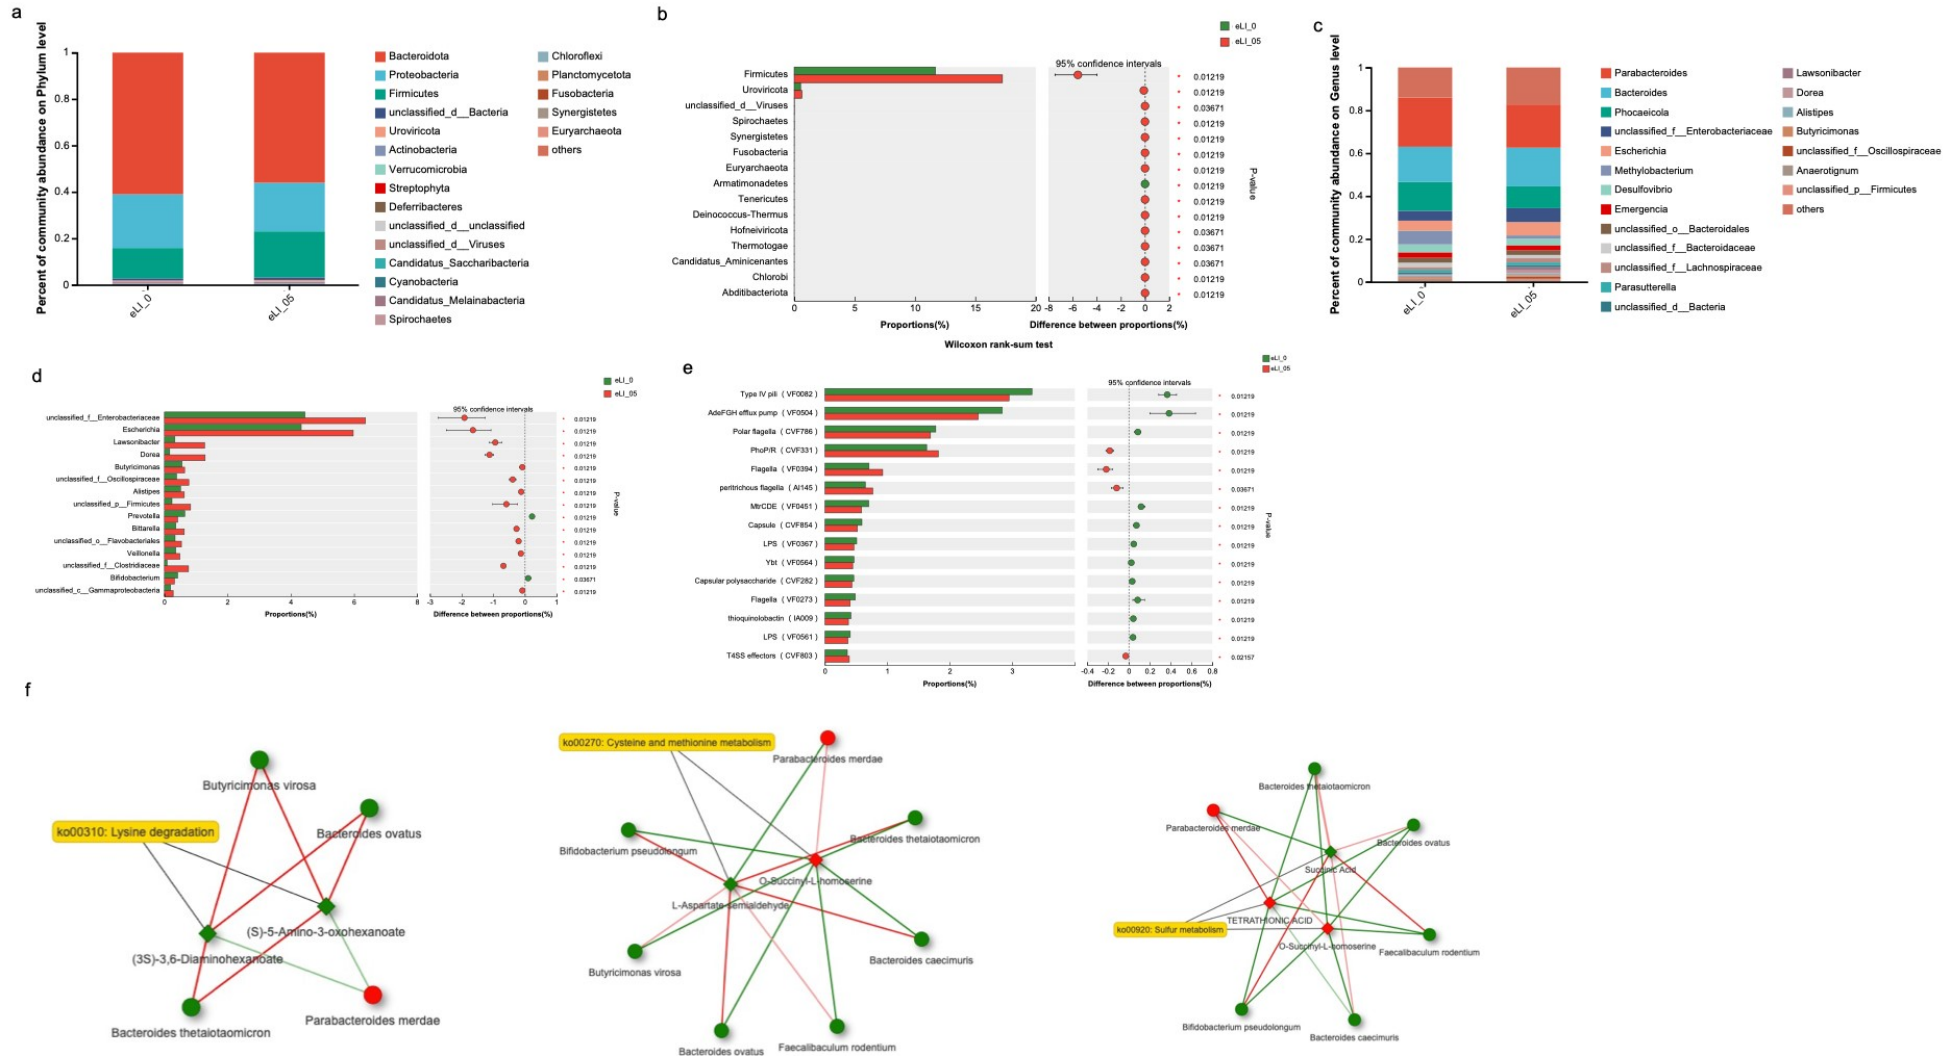

2 Supplementary Fig. S1. Effects of cholesterol on large intestinal microbiota ex vivo. (a) Microbiota composition at the Phylum level for eLI\_0 and eLI\_05 groups. (b)  
3 Top 15 gut microbiota with significant differences in eLI\_0 and eLI\_05 groups at the Phylum level. (c) Microbiota composition at the Genus level for eLI\_0 and eLI\_05  
4 groups. (d) Top 15 gut microbiota with significant differences in eLI\_0 and eLI\_05 groups at the Genus level. (e) Top 15 significantly different virulence factor genes  
5 in eLI\_0 and eLI\_05 groups. (f) Network analysis of significantly changed intestinal microbiota and metabolites. The red/green color of nodes indicates  
6 up/downregulation. The red/green lines indicate the positive/negative correlations between microbes and metabolites. Light nodes/lines indicate no statistical  
7 significance. Dark nodes/lines indicate statistical significance. \*  $P < 0.05$

8

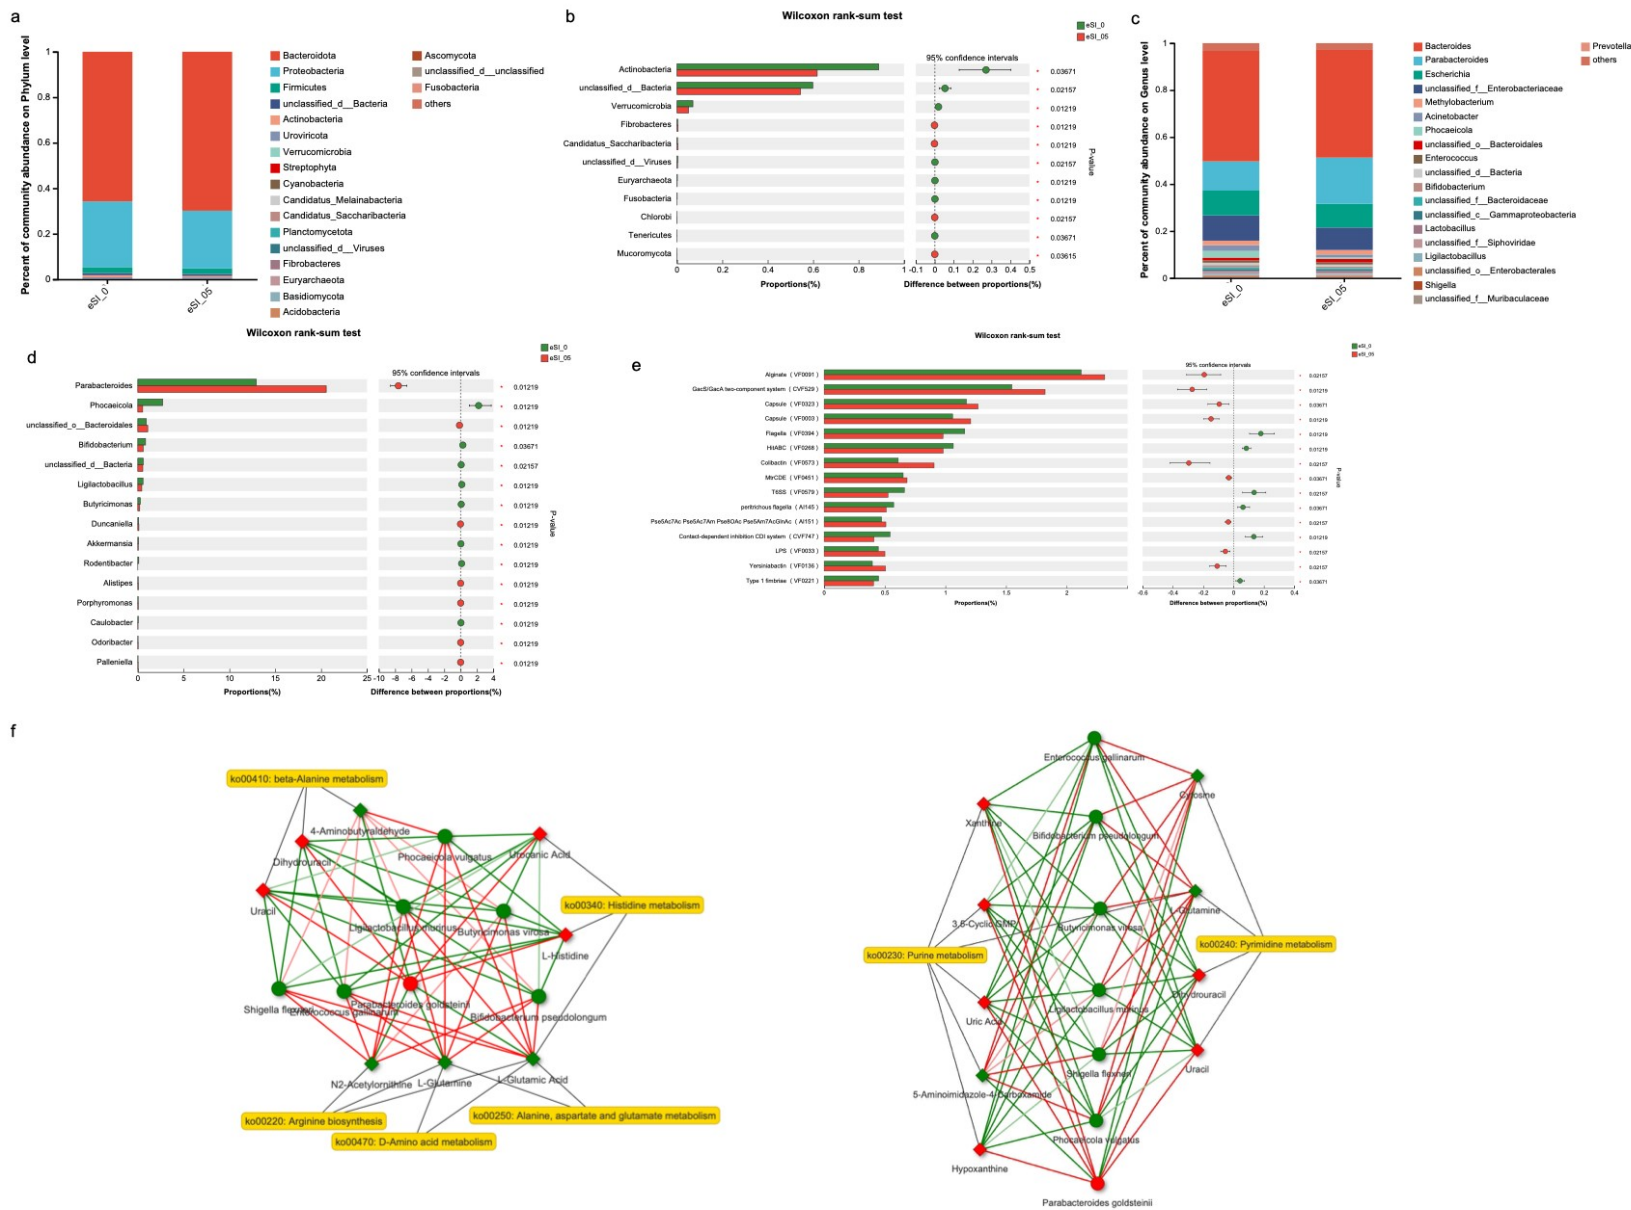

10 Supplementary Fig. S2. Effects of cholesterol on small intestinal microbiota ex vivo. (a) Microbiota composition at the Phylum level for eSI\_0 and eSI\_05 groups. (b)  
11 Top 15 gut microbiota with significant differences in eSI\_0 and eSI\_05 groups at the Phylum level. (c) Microbiota composition at the Genus level for eSI\_0 and eSI\_05  
12 groups. (b) Top 15 gut microbiota with significant differences in eSI\_0 and eSI\_05 groups at the Genus level. (e) Top 15 significantly different virulence factor genes  
13 in eSI\_0 and eSI\_05 groups. (f) Network analysis of significantly changed intestinal microbiota and metabolites. The red/green color of nodes indicates  
14 up/downregulation. The red/green lines indicate the positive/negative correlations between microbes and metabolites. Light nodes/lines indicate no statistical  
15 significance. Dark nodes/lines indicate statistical significance. \*  $P < 0.05$

16

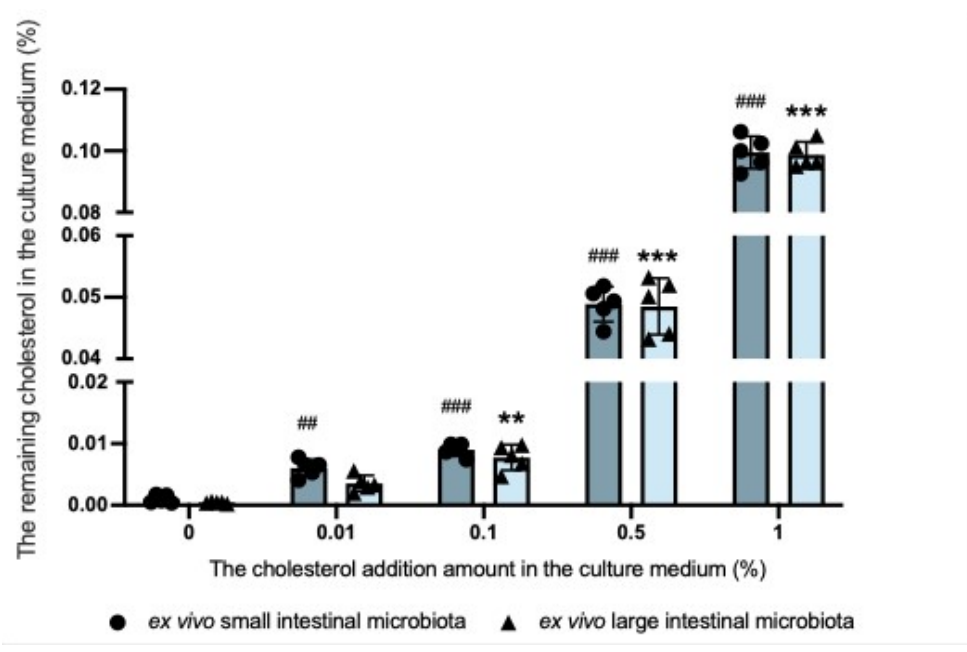

17

18 Supplementary Fig. S3. Cholesterol concentration in the culture medium after co-culturing with the intestinal microbiota. #  $P < 0.05$ , ##  $P < 0.01$ , ###  $P < 0.001$ ,  
 19 compared with the eSI\_0 group; \*  $P < 0.05$ , \*\*  $P < 0.01$ , \*\*\*  $P < 0.001$ , compared with the eLI\_0 group

20

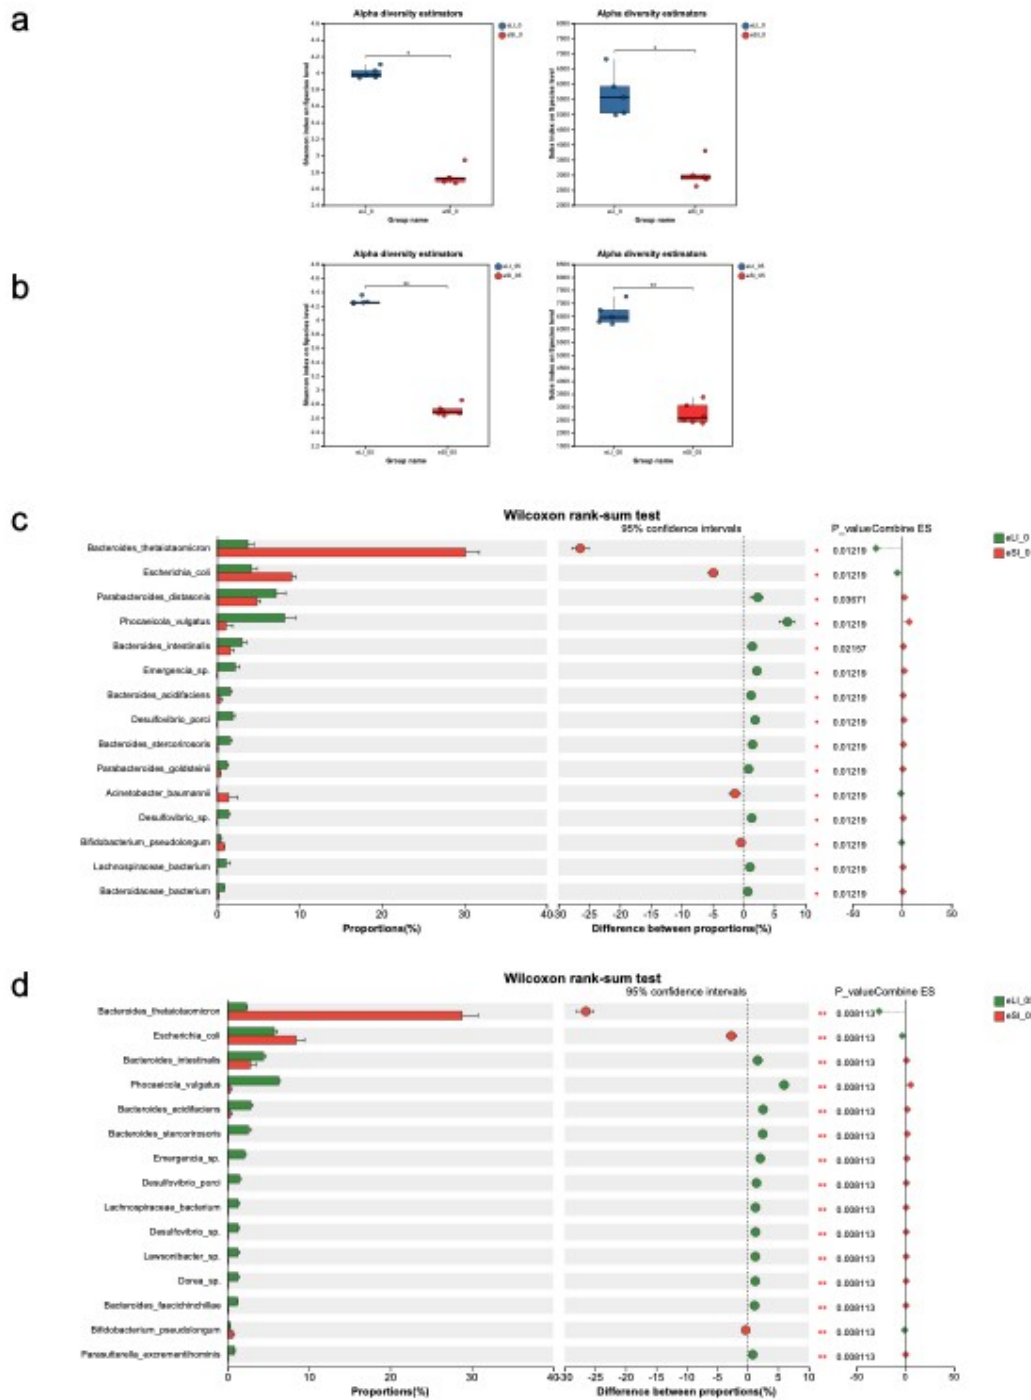

21

22 Supplementary Fig. S4. The differences of cholesterol's effects on the small and large intestinal

23 microbiota in an *ex vivo* model. (a-b) Shannon and Sobs index. (c-d) Significantly different

24 microbiota between eSI and eSI model (the top 15 species by relative abundance). \*  $P < 0.05$ , \*\*  $P$

25 <

0.01

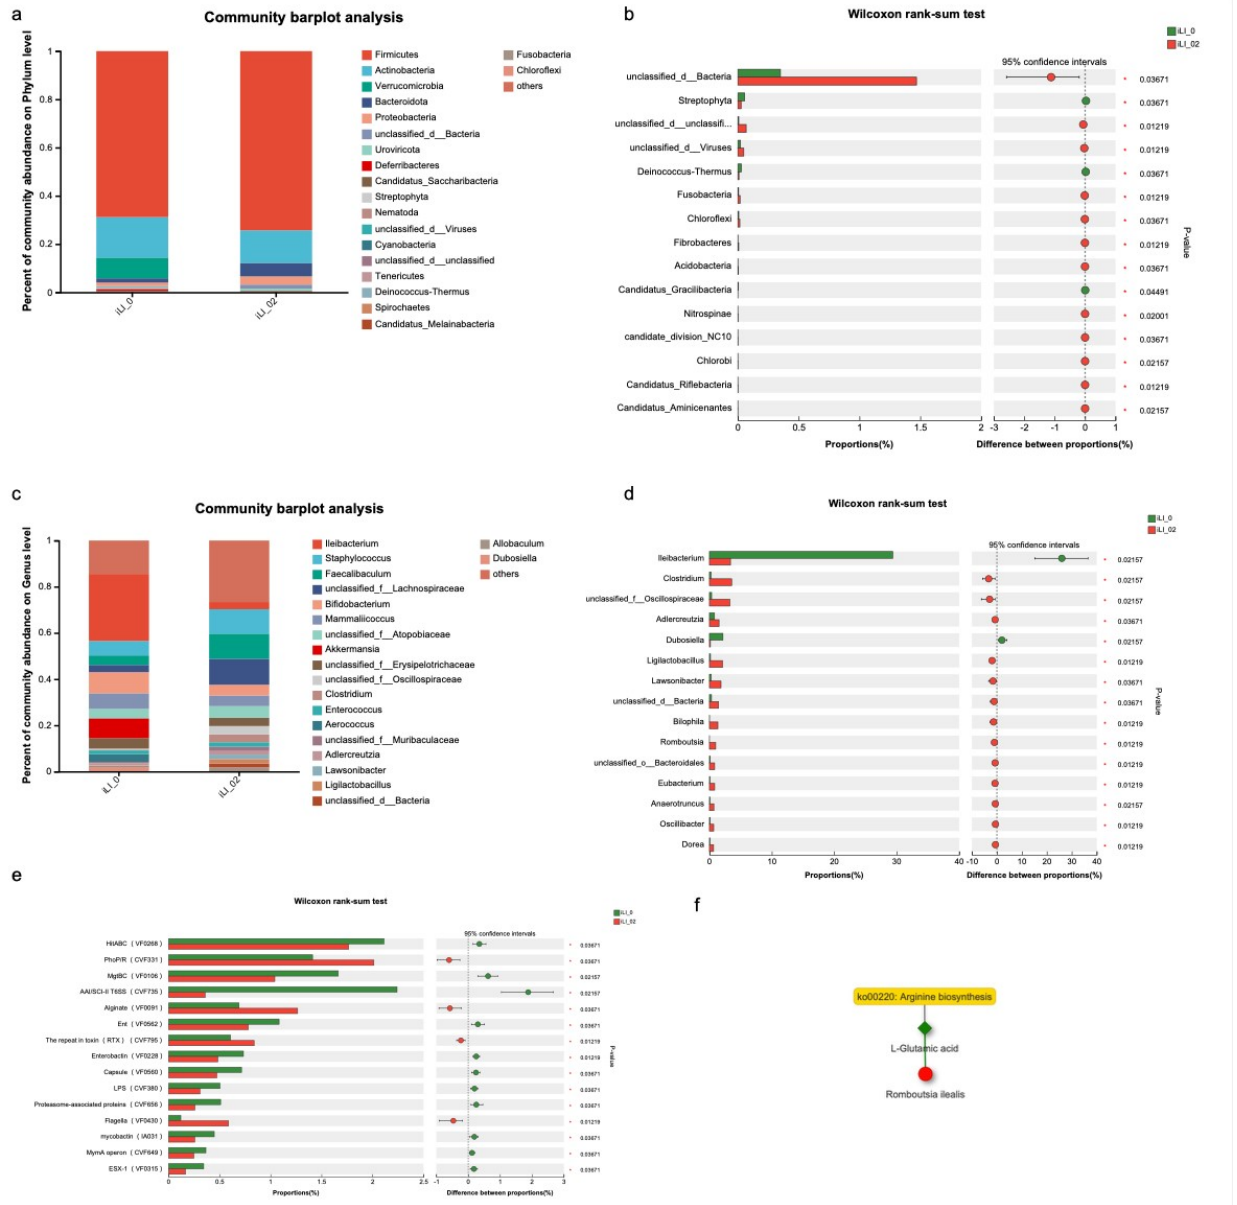

Supplementary Fig. S5. Effects of cholesterol on large intestinal microbiota *in vivo*. (a) Microbiota composition at the Phylum level for iLI\_0 and iLI\_02 groups. (b) Top 15 gut microbiota with significant differences in iLI\_0 and iLI\_02 groups at the Phylum level. (c) Microbiota composition at the Genus level for iLI\_0 and iLI\_02 groups. (d) Top 15 gut microbiota with significant differences in iLI\_0 and iLI\_02 groups at the Genus level. (e) Top 15 significantly different virulence factor genes in iLI\_0 and iLI\_02 groups. (f) Network analysis of significantly changed intestinal microbiota and metabolites. The red/green color of nodes indicates up/downregulation.

The red/green lines indicate the positive/negative correlations between microbes and metabolites.

Light nodes/lines indicate no statistical significance. Dark nodes/lines indicate statistical significance. \*  $P < 0.05$



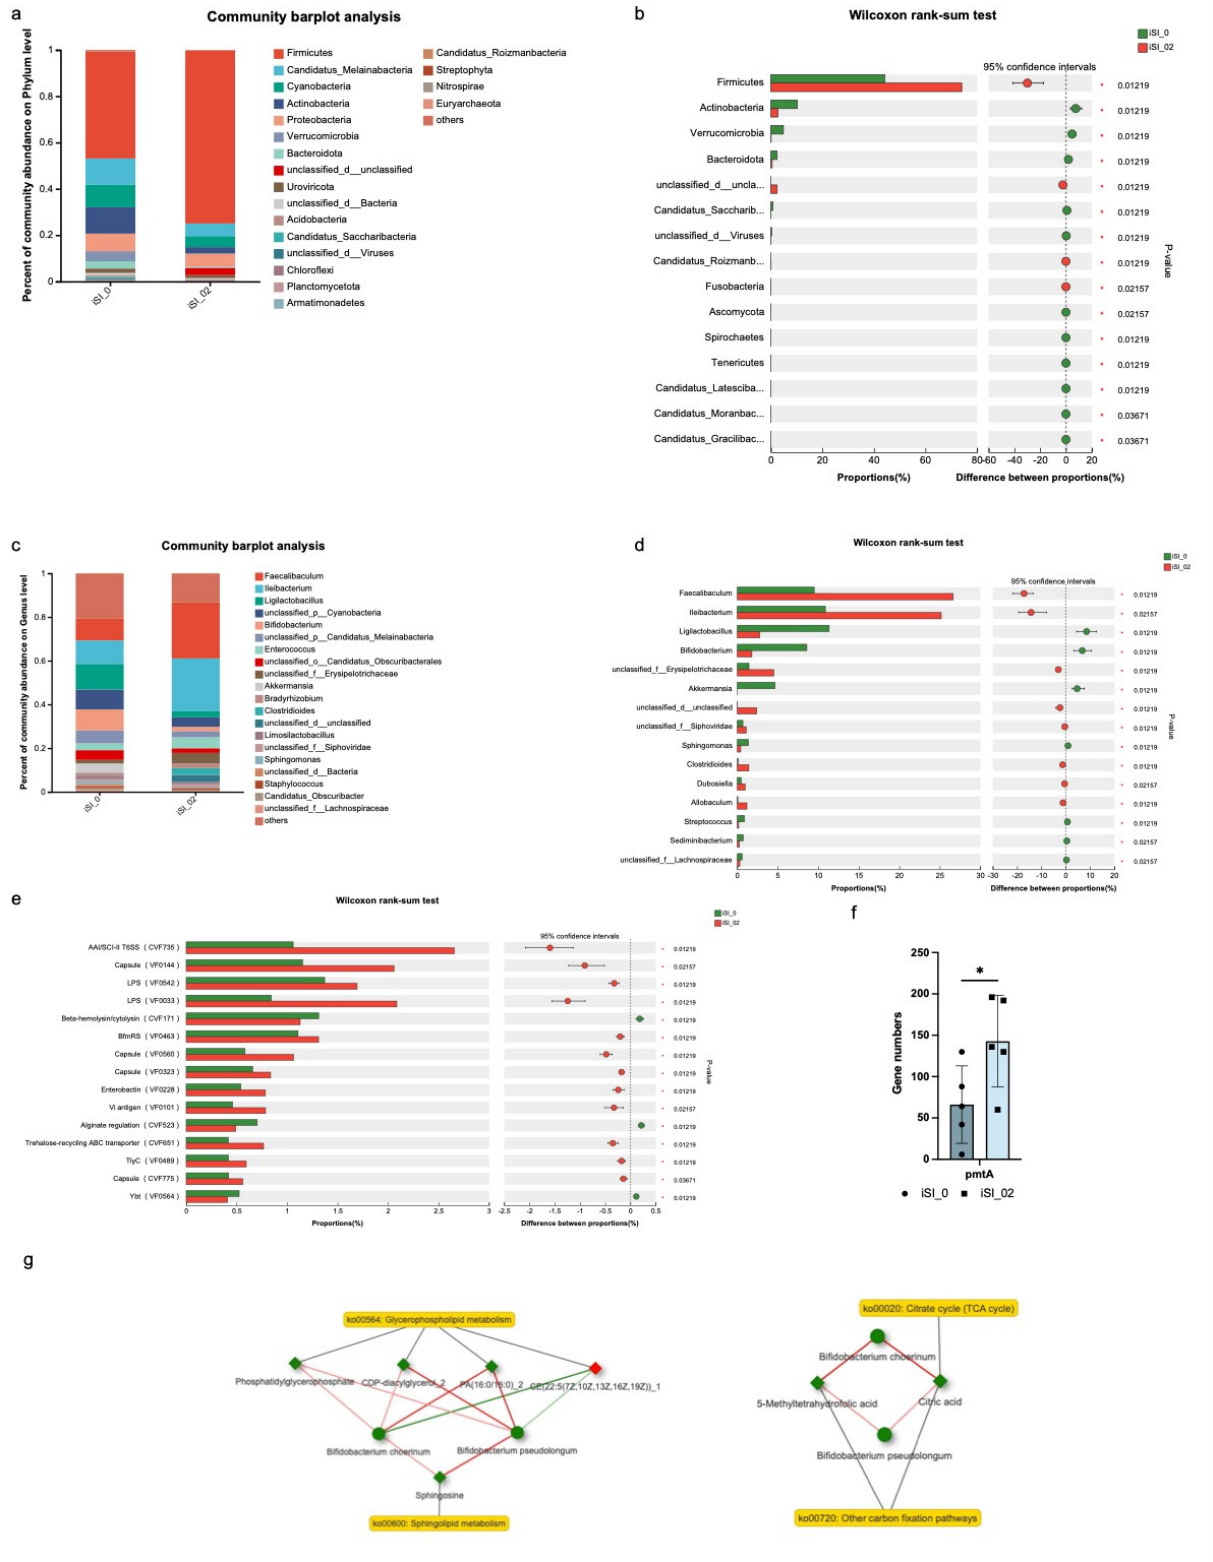

Supplementary Fig. S6. Effects of cholesterol on small intestinal microbiota *in vivo*. (a) Microbiota composition at the Phylum level for iSI\_0 and iSI\_02 groups. (b) Top 15 gut microbiota with significant differences in iSI\_0 and iSI\_02 groups at the Phylum level. (c) Microbiota composition

at the Genus level for iSI\_0 and iSI\_02 groups. (b) Top 15 gut microbiota with significant differences in iSI\_0 and iSI\_02 groups at the Genus level. (c) Top 15 significantly different virulence factor genes in iSI\_0 and iSI\_02 groups. (d) Gene numbers of pmtA in iSI\_0 and iSI\_02 groups. (e) Network analysis of significantly changed intestinal microbiota and metabolites. The red/green color of nodes indicates up/downregulation. The red/green lines indicate the positive/negative correlations between microbes and metabolites. Light nodes/lines indicate no statistical significance. Dark nodes/lines indicate statistical significance. \*  $P < 0.05$

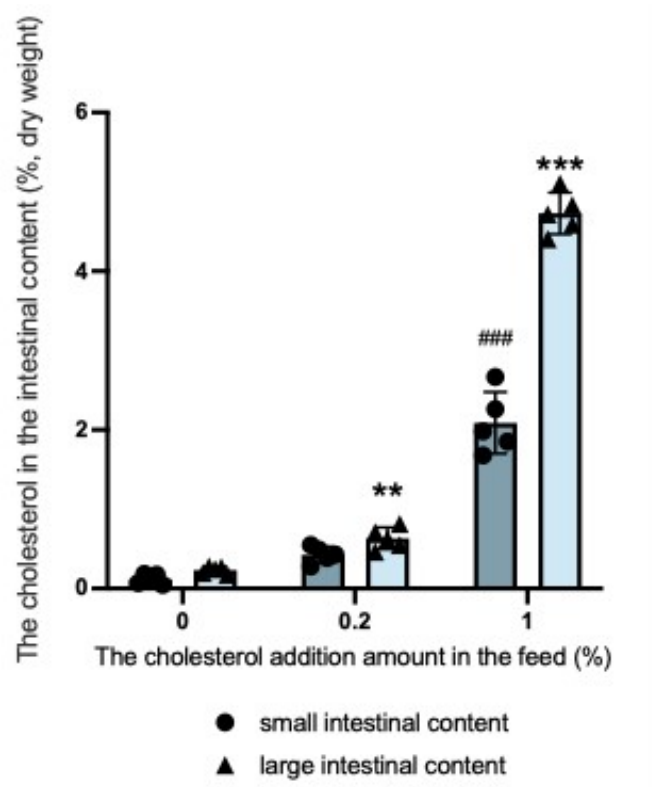

Supplementary Fig. S7. Cholesterol concentration in the intestinal content. #  $P < 0.05$ , ##  $P < 0.01$ , ###  $P < 0.001$ , compared with the iSI\_0 group; \*  $P < 0.05$ , \*\*  $P < 0.01$ , \*\*\*  $P < 0.001$ , compared with the iLI\_0 group

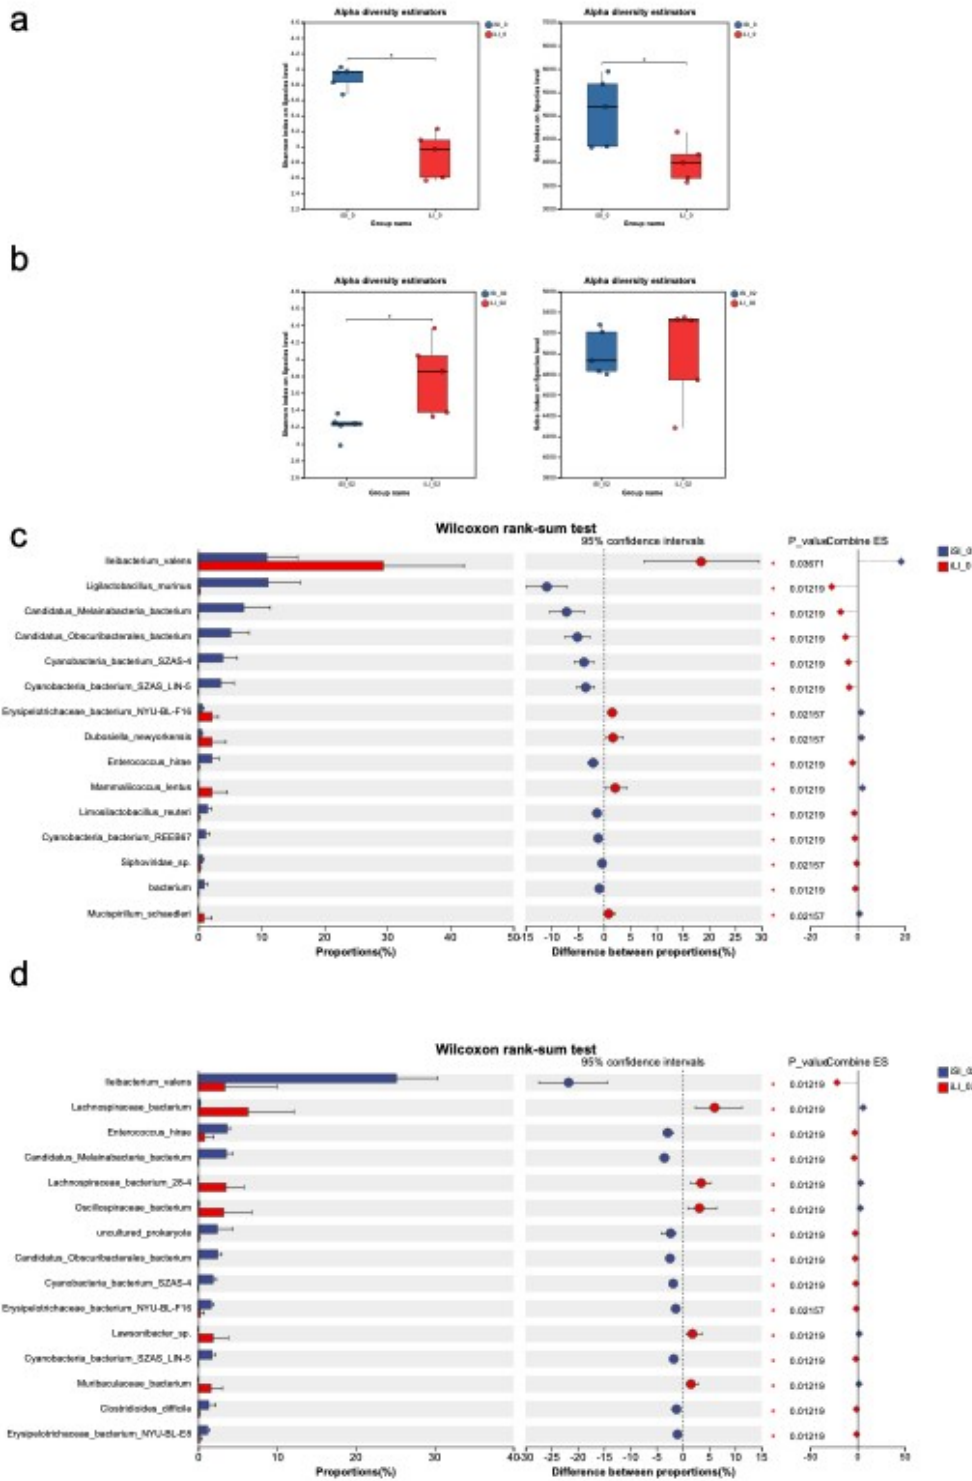

Supplementary Fig. S8. The differences of cholesterol's effects on the small and large intestinal microbiota in an *in vivo* model. (a-b) Shannon and Sobs index. (c-d) Significantly different microbiota between iSI and iSI model (the top 15 species by relative abundance). \*  $P < 0.05$ , \*\*  $P < 0.01$
